# Supplementary material for: Herbicide injury induces DNA methylome alterations in Arabidopsis
Source: PubMed Central journal article supplement (PMC5522609; doi:10.7717/peerj.3560), 2017-07-20

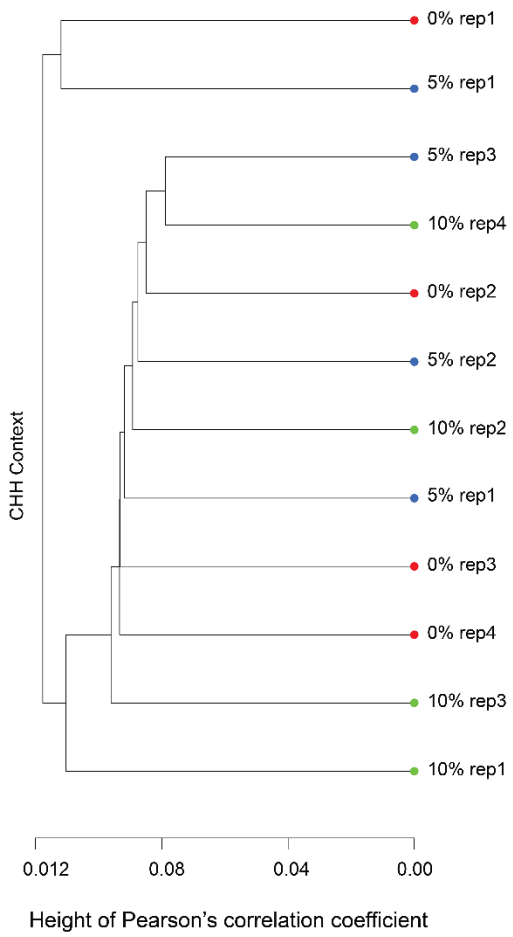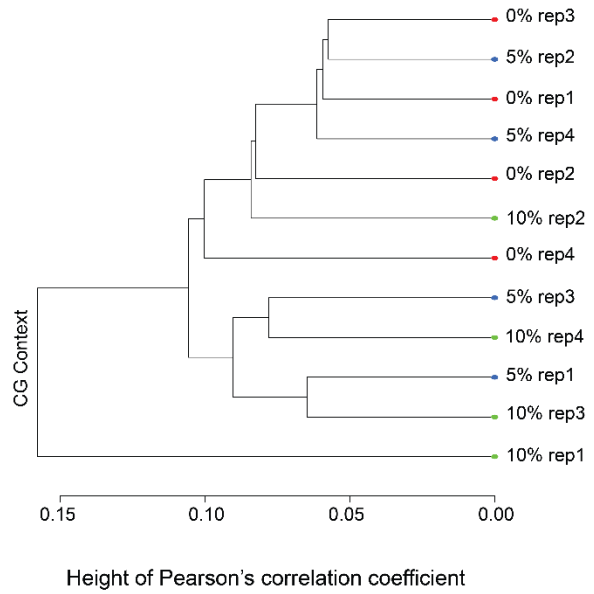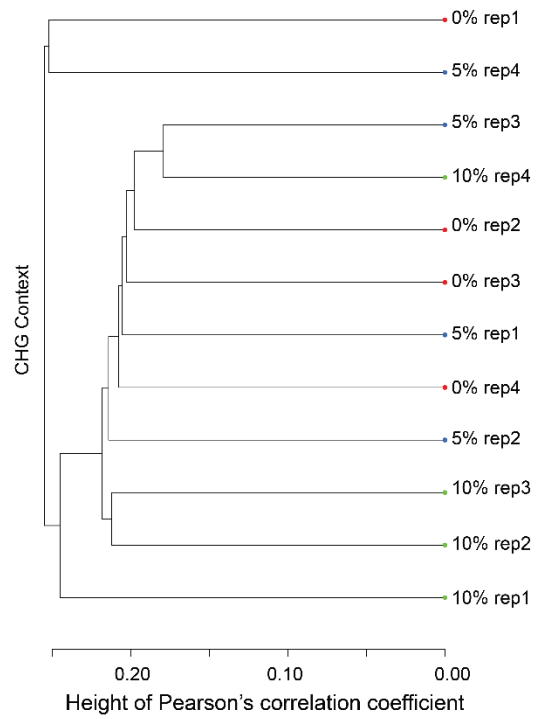

Supplement: peerj-05-3560-s004.pdf [file peerj-05-3560-s004.pdf]
