# Supplementary material for: Herbicide injury induces DNA methylome alterations in Arabidopsis
Source: PeerJ journal article supplement (doi:10.7717/peerj.3560), 2017-07-20

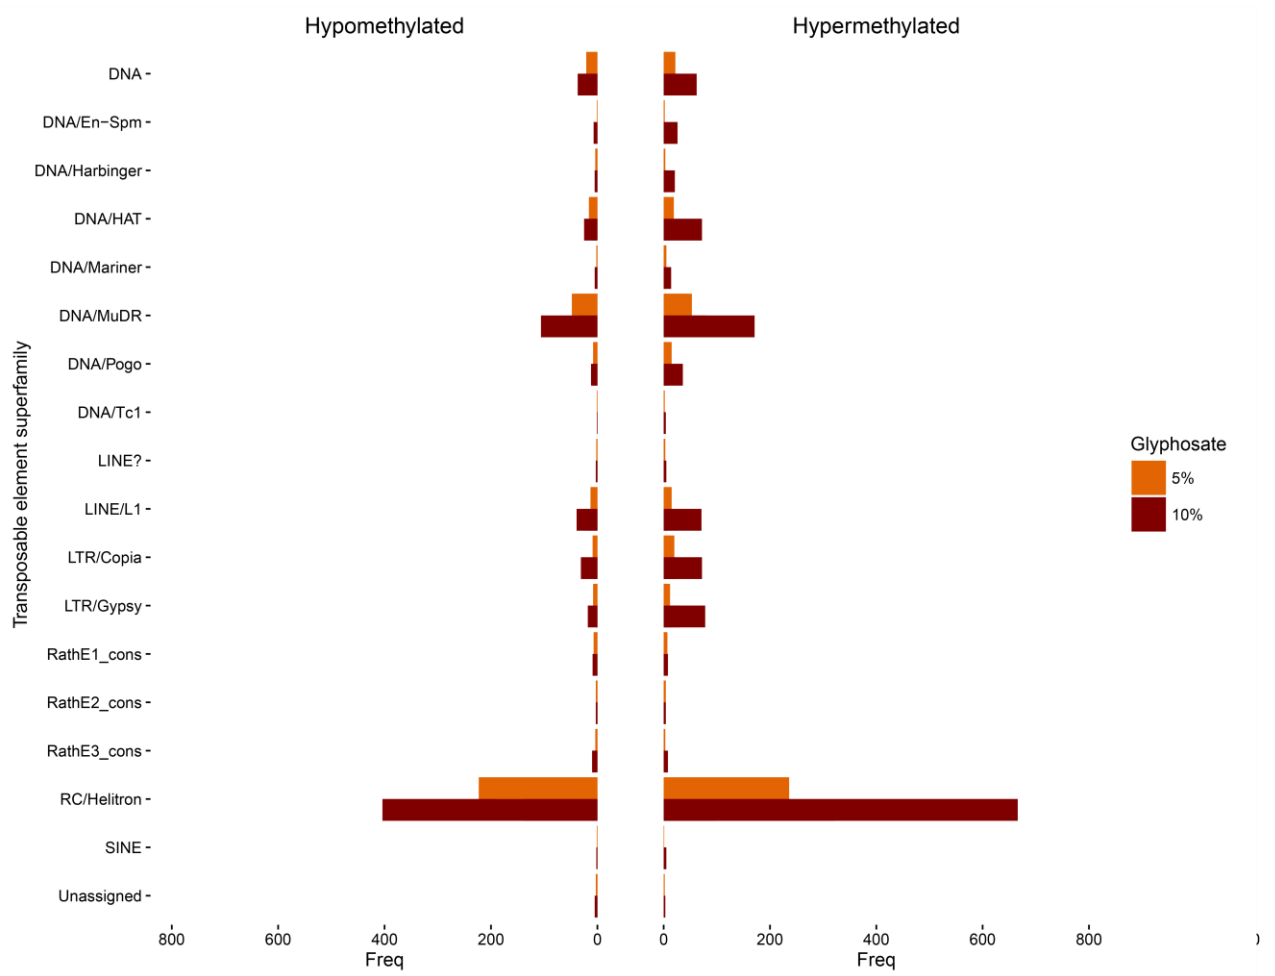

Supplement: Suppl_Fig_5.pdf [file Suppl_Fig_5.pdf]
