# Supplementary material for: Herbicide injury induces DNA methylome alterations in Arabidopsis
Source: PeerJ. 2017 Jul 20;5:e3560. doi: 10.7717/peerj.3560 (PMC5522609; doi:10.7717/peerj.3560)
Supplement: Supplemental Information 8 — All differentially methylated positions (DMPs) identified by methylkit. [file peerj-05-3560-s008.xlsx]

## Sheet: 922_CHG10%
chr	start	end	strand	pvalue	qvalue	meth.diff	geneinfo	category1	description	5% (geneinfo) match	Hyper/hypo	5% DMbase (start) match
Chr2	13717359	13717359	+	0	0	-92.6829	AT2G32291	pseudogene,pseudogenic_transcript,pseudogenic_exon;		OK	hypo	OK
Chr2	13717413	13717413	+	0	0	-91.8367	AT2G32291	pseudogene,pseudogenic_transcript,pseudogenic_exon;		OK	hypo	OK
Chr2	13717369	13717369	+	0	0	-91.0256	AT2G32291	pseudogene,pseudogenic_transcript,pseudogenic_exon;		OK	hypo	OK
Chr2	13717420	13717420	+	0	0	-87.8788	AT2G32291	pseudogene,pseudogenic_transcript,pseudogenic_exon;		OK	hypo	OK
Chr2	13717429	13717429	+	0	0	-83.451	AT2G32291	pseudogene,pseudogenic_transcript,pseudogenic_exon;		OK	hypo	OK
Chr2	13717345	13717345	+	2.91989e-14	1.2455e-09	-79.5455	AT2G32291	pseudogene,pseudogenic_transcript,pseudogenic_exon;		OK	hypo	OK
Chr2	13717555	13717555	+	0	0	-71.2591	AT2G32291	pseudogene,pseudogenic_transcript,pseudogenic_exon;		OK	hypo	OK
Chr2	13717569	13717569	+	0	0	-69.206	AT2G32291	pseudogene,pseudogenic_transcript,pseudogenic_exon;		OK	hypo	OK
Chr2	13717588	13717588	+	0	0	-66.6065	AT2G32291	pseudogene,pseudogenic_transcript,pseudogenic_exon;		OK	hypo	OK
Chr2	13717502	13717502	+	1.11022e-16	5.93394e-12	-65.1263	AT2G32291	pseudogene,pseudogenic_transcript,pseudogenic_exon;		OK	hypo	OK
Chr2	13717557	13717557	-	1.48104e-13	5.47515e-09	-63.0411	AT2G32291	pseudogene,pseudogenic_transcript,pseudogenic_exon;		OK	hypo	OK
Chr5	12662429	12662429	+	0	0	-62.164	AT5G33390	gene,mRNA,protein,exon,CDS;		OK	hypo	OK
Chr5	12662438	12662438	+	0	0	-61.8756	AT5G33390	gene,mRNA,protein,exon,CDS;		OK	hypo	OK
Chr5	12662459	12662459	+	0	0	-61.0398	AT5G33390	gene,mRNA,protein,exon,CDS;		OK	hypo	OK
Chr5	12662453	12662453	+	0	0	-59.9119	AT5G33390	gene,mRNA,protein,exon,CDS;		OK	hypo	OK
Chr5	12662393	12662393	+	3.85936e-12	1.10457e-07	-59.2363	AT5G33390	gene,mRNA,protein,exon,CDS;		OK	hypo	OK
Chr5	12662423	12662423	+	0	0	-57.5824	AT5G33390	gene,mRNA,protein,exon,CDS;		OK	hypo	OK
Chr2	13717571	13717571	-	6.18727e-13	1.98898e-08	-57.4519	AT2G32291	pseudogene,pseudogenic_transcript,pseudogenic_exon;		OK	hypo	OK
Chr3	9394128	9394128	-	0	0	-54.8567	AT3G25727	gene,mRNA,protein,CDS,exon;		OK	hypo	OK
Chr2	13717515	13717515	+	2.36091e-11	5.60079e-07	-54.3465	AT2G32291	pseudogene,pseudogenic_transcript,pseudogenic_exon;		OK	hypo	OK
Chr5	12662414	12662414	+	0	0	-53.9201	AT5G33390	gene,mRNA,protein,exon,CDS;		OK	hypo	OK
Chr5	12662489	12662489	+	0	0	-53.1029	AT5G33390	gene,mRNA,protein,exon,CDS;		OK	hypo	OK
Chr5	12662408	12662408	+	2.31815e-13	8.227e-09	-51.9296	AT5G33390	gene,mRNA,protein,exon,CDS;		OK	hypo	OK
Chr2	13717517	13717517	-	8.36173e-10	1.24897e-05	-50	AT2G32291	pseudogene,pseudogenic_transcript,pseudogenic_exon;		OK	hypo	OK
Chr5	12662444	12662444	+	0	0	-49.8582	AT5G33390	gene,mRNA,protein,exon,CDS;		OK	hypo	OK
Chr5	12662468	12662468	+	0	0	-48.6488	AT5G33390	gene,mRNA,protein,exon,CDS;		OK	hypo	OK
Chr5	12662474	12662474	+	0	0	-48.0474	AT5G33390	gene,mRNA,protein,exon,CDS;		OK	hypo	OK
Chr1	8837272	8837272	+	1.11022e-16	5.93394e-12	-47.0492	AT1G25220	gene,mRNA,three_prime_UTR,exon;	anthranilate synthase beta subunit 1	OK	hypo	OK
Chr5	16600960	16600960	-	8.43095e-07	0.00267918	28.2026	AT5G41490	gene,mRNA,protein,exon,CDS;		OK	hyper	OK
Chr5	9680688	9680688	+	1.26355e-08	0.000119772	30	AT5G27410	gene,mRNA,protein,exon,CDS;		OK	hyper	OK
Chr2	9384460	9384460	+	3.44535e-09	4.16465e-05	30.9877	AT2G22070	gene,mRNA,protein,exon,CDS;	pentatricopeptide (PPR) repeat-containing protein	OK	hyper	OK
Chr3	23079146	23079146	-	1.32118e-08	0.000124174	34.4828	AT3G62360	gene,mRNA,protein;		OK	hyper	OK
Chr3	22071016	22071016	-	2.48932e-08	0.000203942	55.5556	AT3G59750	gene,mRNA,protein,CDS,exon;		OK	hyper	OK
Chr3	11054068	11054068	-	7.80759e-08	0.000487145	-30.259	Chr3	transposable_element,transposon_fragment;			hypo	OK
Chr3	21509736	21509736	+	8.08441e-07	0.00259696	27.1015	NONE				hyper	OK
Chr3	15808110	15808110	-	4.15572e-08	0.000297829	27.8686	NONE				hyper	OK
Chr3	21509746	21509746	+	2.42109e-08	0.000200381	30.4688	NONE				hyper	OK
Chr3	21509722	21509722	+	1.06149e-08	0.000104077	30.9125	NONE				hyper	OK
Chr3	9232690	9232690	+	1.29722e-07	0.000711336	33.8285	NONE				hyper	OK
Chr3	9232674	9232674	+	2.26084e-11	5.45082e-07	34.5599	NONE				hyper	OK
Chr3	15807932	15807932	-	1.21126e-06	0.00339657	36.9899	NONE				hyper	OK
Chr3	21509695	21509695	+	1.09565e-11	2.89316e-07	37.2061	NONE				hyper	OK
Chr2	72541	72541	+	1.63869e-13	5.95865e-09	38.1165	NONE				hyper	OK
Chr4	2335615	2335615	+	0	0	38.8332	NONE				hyper	OK
Chr4	2335713	2335713	+	3.41957e-09	4.14477e-05	40.4493	NONE				hyper	OK
Chr3	21509527	21509527	-	2.59917e-09	3.31335e-05	46.8182	NONE				hyper	OK
Chr3	557970	557970	+	0	0	55.3914	NONE				hyper	OK
Chr4	1063734	1063734	-	0	0	58.3817	NONE				hyper	OK
Chr2	13717340	13717340	-	5.62384e-06	0.0093324	-85	AT2G32291	pseudogene,pseudogenic_transcript,pseudogenic_exon;		OK	hypo	#N/A
Chr2	13717338	13717338	+	5.83721e-10	9.11796e-06	-67.3984	AT2G32291	pseudogene,pseudogenic_transcript,pseudogenic_exon;		OK	hypo	#N/A
Chr2	13717606	13717606	-	4.67153e-10	7.50864e-06	-62.615	AT2G32291	pseudogene,pseudogenic_transcript,pseudogenic_exon;		OK	hypo	#N/A
Chr5	12662320	12662320	+	3.28776e-08	0.000251902	-60.4167	AT5G33390	gene,mRNA;		OK	hypo	#N/A
Chr1	8837682	8837682	-	1.09507e-06	0.00320234	-52.6316	AT1G25220	gene,mRNA,protein,CDS,exon;	anthranilate synthase beta subunit 1	OK	hypo	#N/A
Chr3	9394162	9394162	-	0	0	-47.9592	AT3G25727	gene,mRNA,protein,CDS,exon;		OK	hypo	#N/A
Chr2	13717590	13717590	-	4.81619e-07	0.00180773	-42.8772	AT2G32291	pseudogene,pseudogenic_transcript,pseudogenic_exon;		OK	hypo	#N/A
Chr3	9394126	9394126	+	1.49096e-09	2.04774e-05	-40.4669	AT3G25727	gene,mRNA,protein,CDS,exon;		OK	hypo	#N/A
Chr5	12662483	12662483	+	0	0	-40.1399	AT5G33390	gene,mRNA,protein,exon,CDS;		OK	hypo	#N/A
Chr1	8837642	8837642	-	1.29297e-06	0.00356045	-39.1493	AT1G25220	gene,mRNA,protein,CDS,exon;	anthranilate synthase beta subunit 1	OK	hypo	#N/A
Chr3	9394169	9394169	-	2.02061e-14	8.87506e-10	-38.2979	AT3G25727	gene,mRNA,protein,CDS,exon;		OK	hypo	#N/A
Chr1	8837382	8837382	+	3.21328e-07	0.00136149	-37.1429	AT1G25220	gene,mRNA,three_prime_UTR,exon;	anthranilate synthase beta subunit 1	OK	hypo	#N/A
Chr1	8837515	8837515	+	5.10815e-09	5.80433e-05	-34.4852	AT1G25220	gene,mRNA,protein,CDS,exon;	anthranilate synthase beta subunit 1	OK	hypo	#N/A
Chr5	12662711	12662711	+	3.73478e-08	0.000276137	-33.3019	AT5G33390	gene,mRNA,protein,exon,CDS;		OK	hypo	#N/A
Chr1	8837420	8837420	+	5.93245e-07	0.00211744	-33.0357	AT1G25220	gene,mRNA,three_prime_UTR,exon;	anthranilate synthase beta subunit 1	OK	hypo	#N/A
Chr3	9394069	9394069	-	7.14417e-12	1.96851e-07	-28.7671	AT3G25727	gene,mRNA,protein;		OK	hypo	#N/A
Chr3	11593424	11593424	-	1.87503e-07	0.000938829	-27.3973	AT3G29762	pseudogene,pseudogenic_transcript,pseudogenic_exon;		OK	hypo	#N/A
Chr1	8837497	8837497	+	9.25523e-07	0.00286718	-26.9015	AT1G25220	gene,mRNA,protein,CDS,exon;	anthranilate synthase beta subunit 1	OK	hypo	#N/A
Chr3	22071010	22071010	+	1.7879e-06	0.00444342	38.0081	AT3G59750	gene,mRNA,protein,CDS,exon;		OK	hyper	#N/A
Chr4	14995896	14995896	-	1.08776e-07	0.000619448	42.0807	AT4G30790	gene,mRNA,protein,CDS,exon;		OK	hyper	#N/A
Chr3	22070670	22070670	-	7.80727e-10	1.17805e-05	47.7612	AT3G59750	gene,mRNA,protein,CDS,exon;		OK	hyper	#N/A
Chr3	22071014	22071014	+	2.92544e-12	8.53804e-08	61.0264	AT3G59750	gene,mRNA,protein,CDS,exon;		OK	hyper	#N/A
Chr5	15403488	15403488	-	1.14727e-06	0.00329632	-88	Chr5	transposable_element,transposon_fragment;			hypo	#N/A
Chr2	6830344	6830344	-	5.69726e-10	8.9308e-06	-82.3529	NONE				hypo	#N/A
Chr3	17176736	17176736	+	1.62172e-06	0.00416335	-81.8182	NONE				hypo	#N/A
Chr1	13767684	13767684	-	1.43679e-06	0.00383277	-80	NONE				hypo	#N/A
Chr4	16142084	16142084	-	1.05064e-06	0.00310929	-75.9868	AT4G33585	gene,mRNA,protein,CDS,exon;			hypo	#N/A
Chr1	16466720	16466720	+	8.44809e-09	8.69545e-05	-74.2002	NONE				hypo	#N/A
Chr5	8893344	8893344	-	4.36241e-06	0.00792162	-73.3333	NONE				hypo	#N/A
Chr2	1002225	1002225	-	2.44805e-08	0.00020186	-68.75	Chr2	transposable_element,transposon_fragment;			hypo	#N/A
Chr1	12769833	12769833	-	2.60248e-06	0.00567607	-66.6667	AT1G34795	gene,mRNA,protein,CDS,exon;Chr1	Plant thionin family protein		hypo	#N/A
Chr4	16142094	16142094	-	3.74791e-06	0.00718836	-66.6667	AT4G33585	gene,mRNA,protein,CDS,exon;			hypo	#N/A
Chr3	12996739	12996739	-	8.91912e-07	0.00279724	-66.6165	AT3G32021	transposable_element_gene,mRNA,exon;			hypo	#N/A
Chr3	17176738	17176738	-	9.65676e-07	0.00294226	-65.5556	NONE				hypo	#N/A
Chr4	5988076	5988076	+	3.48366e-12	1.01008e-07	-64.6341	AT4G09455	transposable_element_gene,mRNA,exon;Chr4			hypo	#N/A
Chr3	11231939	11231939	+	5.33495e-06	0.00903181	-63.4921	AT3G29265	transposable_element_gene,mRNA,exon;Chr3			hypo	#N/A
Chr4	5988118	5988118	+	4.87221e-12	1.36798e-07	-62.2222	AT4G09455	transposable_element_gene,mRNA,exon;Chr4			hypo	#N/A
Chr4	5988044	5988044	+	1.2791e-06	0.00353984	-61.5385	AT4G09455	transposable_element_gene,mRNA,exon;Chr4			hypo	#N/A
Chr5	6789387	6789387	-	8.25042e-07	0.00263503	-59.5745	NONE				hypo	#N/A
Chr2	11508817	11508817	-	4.76065e-06	0.00838063	-59.4697	NONE				hypo	#N/A
Chr3	11097345	11097345	-	4.10823e-10	6.67579e-06	-59.1252	Chr3	transposable_element,transposon_fragment;			hypo	#N/A
Chr3	13000643	13000643	+	2.87537e-07	0.00126419	-58.9184	NONE				hypo	#N/A
Chr4	5987851	5987851	-	4.1267e-13	1.37646e-08	-58.7302	AT4G09455	transposable_element_gene,mRNA,exon;Chr4			hypo	#N/A
Chr4	5988173	5988173	+	2.1023e-07	0.00100824	-58.3333	AT4G09455	transposable_element_gene,mRNA,exon;Chr4			hypo	#N/A
Chr4	5988070	5988070	+	3.78501e-10	6.26531e-06	-56.0976	AT4G09455	transposable_element_gene,mRNA,exon;Chr4			hypo	#N/A
Chr2	1002216	1002216	-	8.4947e-07	0.00269011	-55.8824	Chr2	transposable_element,transposon_fragment;			hypo	#N/A
Chr5	22705276	22705276	-	4.69562e-06	0.00830239	-55.3427	NONE				hypo	#N/A
Chr2	8893739	8893739	-	1.58933e-06	0.00410874	-53.125	Chr2	transposable_element,transposon_fragment;			hypo	#N/A
Chr2	5483163	5483163	+	7.68774e-07	0.0025117	-52	AT2G13250	transposable_element_gene,mRNA,exon;Chr2	gypsy-like retrotransposon family (Athila), has a 4.1e-91 P-value blast match to GB:CAA57397 Athila ORF 1 (Arabidopsis thaliana)		hypo	#N/A
Chr5	10560044	10560044	+	4.93245e-06	0.00856895	-51.5782	NONE				hypo	#N/A
Chr3	21969200	21969200	+	4.14405e-08	0.000297473	-51.4881	NONE				hypo	#N/A
Chr1	9630665	9630665	+	9.8573e-09	9.84886e-05	-51.3725	AT1G27671	pseudogene,pseudogenic_transcript,pseudogenic_exon;	pseudogene of DRM2/DMT7 (domain rearranged methyltransferase protein)		hypo	#N/A
Chr4	16141872	16141872	+	2.14462e-12	6.42834e-08	-51.3721	AT4G33585	gene,mRNA,protein,CDS,exon;			hypo	#N/A
Chr4	5988046	5988046	-	4.43867e-13	1.46946e-08	-50.9615	AT4G09455	transposable_element_gene,mRNA,exon;Chr4			hypo	#N/A
Chr2	2251728	2251728	+	5.97403e-06	0.00970769	-50.5515	AT2G05880	transposable_element_gene,mRNA,exon;Chr2	similar to replication protein-related [Arabidopsis thaliana] (TAIR:AT5G35260.1)		hypo	#N/A
Chr2	3011936	3011936	+	6.91047e-07	0.00234914	-50.4137	AT2G07240	gene,mRNA,five_prime_UTR,exon;Chr2	cysteine-type peptidases		hypo	#N/A
Chr3	3542801	3542801	+	2.32199e-06	0.00527976	-50.3788	AT3G11310	gene,mRNA,protein,CDS,exon;			hypo	#N/A
Chr2	10507818	10507818	-	3.29129e-06	0.00660106	-50.3663	Chr2	transposable_element,transposon_fragment;			hypo	#N/A
Chr4	16141874	16141874	-	9.70455e-07	0.00295276	-50.1284	AT4G33585	gene,mRNA,protein,CDS,exon;			hypo	#N/A
Chr4	5988103	5988103	+	4.01656e-08	0.000290712	-50.1075	AT4G09455	transposable_element_gene,mRNA,exon;Chr4			hypo	#N/A
Chr2	6030493	6030493	+	1.59061e-06	0.004109	-50	Chr2	transposable_element,transposon_fragment;			hypo	#N/A
Chr3	11223419	11223419	+	1.14598e-06	0.00329576	-49.9106	Chr3	transposable_element,transposon_fragment;			hypo	#N/A
Chr4	8622272	8622272	+	4.1705e-07	0.0016197	-49.3878	AT4G15096	gene,mRNA,protein,exon,CDS;			hypo	#N/A
Chr2	6721966	6721966	+	4.56302e-14	1.82364e-09	-49.2769	AT2G15410	transposable_element_gene,mRNA,exon;Chr2	gypsy-like retrotransposon family, has a 4.1e-217 P-value blast match to GB:AAD19359 polyprotein (gypsy_Ty3-element) (Sorghum bicolor)		hypo	#N/A
Chr4	2317079	2317079	-	1.89175e-08	0.000165526	-49.0196	NONE				hypo	#N/A
Chr4	5988051	5988051	+	9.2453e-07	0.00286611	-48.5294	AT4G09455	transposable_element_gene,mRNA,exon;Chr4			hypo	#N/A
Chr5	8505599	8505599	-	3.84749e-07	0.00153008	-48.4749	AT5G24775	transposable_element_gene,mRNA,exon;			hypo	#N/A
Chr1	6960060	6960060	+	8.9759e-07	0.00280418	-48.4102	NONE				hypo	#N/A
Chr2	6962088	6962088	-	1.12582e-06	0.00326378	-48.2372	Chr2	transposable_element,transposon_fragment;			hypo	#N/A
Chr3	22031690	22031690	+	2.84468e-07	0.00125318	-47.6663	NONE				hypo	#N/A
Chr1	4493748	4493748	-	8.04843e-07	0.00258915	-47.6316	Chr1	transposable_element,transposon_fragment;			hypo	#N/A
Chr1	6960029	6960029	+	7.40958e-08	0.000468686	-47.5	NONE				hypo	#N/A
Chr4	6727697	6727697	-	3.60782e-06	0.00703207	-47.4855	AT4G10990	transposable_element_gene,mRNA,exon;Chr4			hypo	#N/A
Chr4	11686353	11686353	-	4.01239e-06	0.00748741	-47.4725	NONE				hypo	#N/A
Chr4	5988438	5988438	+	1.98716e-06	0.00478836	-47.3684	AT4G09455	transposable_element_gene,mRNA,exon;Chr4			hypo	#N/A
Chr5	13047501	13047501	+	7.61211e-07	0.00250325	-47.0588	Chr5	transposable_element,transposon_fragment;			hypo	#N/A
Chr3	22767602	22767602	-	0	0	-46.7781	Chr3	transposable_element,transposon_fragment;			hypo	#N/A
Chr4	5987844	5987844	-	9.96692e-12	2.66357e-07	-46.7532	AT4G09455	transposable_element_gene,mRNA,exon;Chr4			hypo	#N/A
Chr2	2155253	2155253	-	3.41716e-06	0.0067796	-46.5903	Chr2	transposable_element,transposon_fragment;			hypo	#N/A
Chr4	5297956	5297956	-	5.10046e-06	0.00878364	-46.5659	NONE				hypo	#N/A
Chr2	4812859	4812859	-	3.24038e-07	0.00136905	-46.5476	AT2G11940	transposable_element_gene,mRNA,exon;Chr2	gypsy-like retrotransposon family, has a 7.0e-189 P-value blast match to GB:AAD19359 polyprotein (gypsy_Ty3-element) (Sorghum bicolor)		hypo	#N/A
Chr3	16274451	16274451	-	4.0335e-07	0.00158069	-46.2745	Chr3	transposable_element,transposon_fragment;			hypo	#N/A
Chr3	12349314	12349314	+	9.97846e-07	0.00299502	-45.9481	AT3G30720	gene,mRNA,exon,five_prime_UTR;Chr3			hypo	#N/A
Chr1	6960001	6960001	+	1.13548e-06	0.00327731	-45.4545	NONE				hypo	#N/A
Chr5	26259954	26259954	-	2.95162e-07	0.00128812	-45.4521	Chr5	transposable_element,transposon_fragment;			hypo	#N/A
Chr5	11149744	11149744	-	4.01857e-06	0.00749041	-45.3901	AT5G29090	transposable_element_gene,mRNA,exon;Chr5			hypo	#N/A
Chr5	5528835	5528835	-	2.78631e-07	0.00124477	-45.1748	AT5G16810	gene,mRNA,protein;			hypo	#N/A
Chr4	5987849	5987849	+	4.79366e-07	0.00180217	-45	AT4G09455	transposable_element_gene,mRNA,exon;Chr4			hypo	#N/A
Chr4	4324913	4324913	+	2.36789e-07	0.00109994	-44.6336	AT4G07517	transposable_element_gene,mRNA,exon;Chr4			hypo	#N/A
Chr1	13353182	13353182	+	4.53859e-13	1.49141e-08	-44.5606	NONE				hypo	#N/A
Chr4	1955837	1955837	+	4.30104e-07	0.00165627	-44.3208	Chr4	transposable_element,transposon_fragment;			hypo	#N/A
Chr3	5986979	5986979	-	7.77067e-12	2.10197e-07	-44.2249	AT3G17500	gene,mRNA,protein,exon,CDS;			hypo	#N/A
Chr3	11097329	11097329	-	7.41536e-07	0.00246211	-44.181	Chr3	transposable_element,transposon_fragment;			hypo	#N/A
Chr3	14509729	14509729	-	4.50461e-10	7.26667e-06	-43.8528	AT3G42385	gene,mRNA,protein,exon,CDS;Chr3			hypo	#N/A
Chr5	18260099	18260099	+	2.64569e-06	0.00574028	-43.6389	Chr5	transposable_element,transposon_fragment;			hypo	#N/A
Chr3	11859295	11859295	-	2.29942e-07	0.00107489	-43.5484	Chr3	transposable_element,transposon_fragment;			hypo	#N/A
Chr4	14979703	14979703	+	3.20854e-13	1.12891e-08	-43.452	NONE				hypo	#N/A
Chr1	21747227	21747227	+	8.48162e-07	0.00269011	-43.439	AT1G58602	gene,mRNA;Chr1	LRR and NB-ARC domains-containing disease resistance protein		hypo	#N/A
Chr3	21969001	21969001	+	8.4599e-14	3.26346e-09	-43.4306	NONE				hypo	#N/A
Chr4	5084430	5084430	+	5.55112e-16	2.83056e-11	-43.1666	AT4G08110	transposable_element_gene,mRNA,exon;Chr4			hypo	#N/A
Chr4	1752771	1752771	-	1.05738e-06	0.0031171	-43.0909	AT4G03810	transposable_element_gene,mRNA,exon;Chr4			hypo	#N/A
Chr1	21249265	21249265	-	0	0	-43.0322	NONE				hypo	#N/A
Chr3	10641241	10641241	-	6.80274e-07	0.00232751	-43.0137	AT3G28410	gene,mRNA,protein,CDS,exon;			hypo	#N/A
Chr3	5986733	5986733	+	2.25623e-06	0.00519951	-42.8488	AT3G17500	gene,mRNA,protein,exon,CDS;			hypo	#N/A
Chr1	12987671	12987671	+	2.04053e-06	0.00485632	-42.8388	NONE				hypo	#N/A
Chr4	16142062	16142062	+	7.22755e-14	2.83742e-09	-42.7789	AT4G33585	gene,mRNA,protein,CDS,exon;			hypo	#N/A
Chr1	17554695	17554695	-	5.1251e-07	0.00189624	-42.6467	NONE				hypo	#N/A
Chr3	16602926	16602926	+	3.45814e-06	0.00683036	-42.6056	AT3G45270	transposable_element_gene,mRNA,exon;Chr3			hypo	#N/A
Chr1	26395149	26395149	-	2.19817e-06	0.00510818	-42.5837	AT1G70080	gene,mRNA,protein;	Terpenoid cyclases/Protein prenyltransferases superfamily protein		hypo	#N/A
Chr1	22357019	22357019	+	6.17869e-07	0.00217539	-42.3387	NONE				hypo	#N/A
Chr1	12166620	12166620	+	1.25722e-08	0.000119428	-42.3299	AT1G33550	transposable_element_gene,mRNA,exon;Chr1	pseudogene, hypothetical protein		hypo	#N/A
Chr4	5987694	5987694	-	8.7616e-07	0.0027527	-42.2222	AT4G09455	transposable_element_gene,mRNA,exon;Chr4			hypo	#N/A
Chr4	5988053	5988053	-	1.63519e-10	3.04791e-06	-42.1569	AT4G09455	transposable_element_gene,mRNA,exon;Chr4			hypo	#N/A
Chr2	5791772	5791772	+	1.61574e-06	0.00415522	-42.1053	NONE				hypo	#N/A
Chr2	1402389	1402389	-	7.56742e-08	0.000473544	-41.8585	AT2G04160	gene,mRNA,protein,CDS,exon;	Subtilisin-like serine endopeptidase family protein		hypo	#N/A
Chr3	7902588	7902588	-	4.37151e-08	0.000308313	-41.8557	AT3G22350	gene,mRNA,protein,exon,CDS;			hypo	#N/A
ChrM	25084	25084	+	2.63197e-08	0.000212185	-41.8075					hypo	#N/A
Chr3	14923296	14923296	+	7.79346e-07	0.00253343	-41.6988	AT3G42820	transposable_element_gene,mRNA,exon;Chr3			hypo	#N/A
Chr3	11097318	11097318	-	1.59241e-07	0.00083721	-41.6667	Chr3	transposable_element,transposon_fragment;			hypo	#N/A
Chr5	8751836	8751836	-	3.67056e-06	0.0071142	-41.6667	NONE				hypo	#N/A
Chr1	17056910	17056910	+	7.77156e-16	3.83069e-11	-41.5409	AT1G45120	transposable_element_gene,mRNA,exon;Chr1	copia-like retrotransposon family, has a 1.5e-294 P-value blast match to GB:CAA72989 open reading frame 1 (Ty1_Copia-element) (Brassica oleracea)		hypo	#N/A
Chr1	14189967	14189967	+	1.4501e-08	0.000133339	-41.5	AT1G37170	transposable_element_gene,mRNA,exon;Chr1	Mutator-like transposase family, has a 1.1e-84 P-value blast match to O22278 /203-375 Pfam PF03108 MuDR family transposase (MuDr-element domain)		hypo	#N/A
Chr3	13313664	13313664	-	1.9254e-06	0.00469569	-41.4024	NONE				hypo	#N/A
Chr4	5988000	5988000	-	1.34061e-10	2.65501e-06	-41.2371	AT4G09455	transposable_element_gene,mRNA,exon;Chr4			hypo	#N/A
Chr4	2316809	2316809	-	2.7899e-07	0.00124513	-41.0518	NONE				hypo	#N/A
Chr2	7527774	7527774	+	3.01605e-06	0.00621161	-41.0288	AT2G17305	gene,mRNA,protein,exon,CDS;	CONTAINS InterPro DOMAIN/s: FBD (InterPro:IPR013596), FBD-like (InterPro:IPR006566)		hypo	#N/A
Chr1	13478965	13478965	+	1.53441e-07	0.000814227	-40.8062	NONE				hypo	#N/A
Chr3	12389140	12389140	+	7.25279e-08	0.000462282	-40.6872	AT3G30745	transposable_element_gene,mRNA,exon;Chr3			hypo	#N/A
Chr4	5084335	5084335	+	0	0	-40.455	AT4G08110	transposable_element_gene,mRNA,exon;Chr4			hypo	#N/A
Chr3	11457957	11457957	-	2.83977e-06	0.00597334	-40.3693	AT3G29634	transposable_element_gene,mRNA,exon;			hypo	#N/A
Chr1	21249372	21249372	-	3.34986e-09	4.09384e-05	-40.3236	Chr1	transposable_element,transposon_fragment;			hypo	#N/A
Chr5	9894308	9894308	+	1.01001e-06	0.00302334	-40.2715	AT5G27885	transposable_element_gene,mRNA,exon;Chr5			hypo	#N/A
Chr5	11765850	11765850	-	2.63476e-08	0.000212185	-40.25	AT5G31909	pseudogene,pseudogenic_transcript,pseudogenic_exon;			hypo	#N/A
Chr1	22357051	22357051	+	1.39322e-08	0.000129845	-40.1462	NONE				hypo	#N/A
Chr1	11323797	11323797	-	4.89297e-06	0.00852561	-40.0419	AT1G31640	gene,mRNA,protein,CDS,exon;	AGAMOUS-like 92		hypo	#N/A
Chr4	2043122	2043122	-	6.14564e-07	0.00217064	-40.0037	NONE				hypo	#N/A
Chr4	5987842	5987842	+	2.82761e-06	0.00595624	-40	AT4G09455	transposable_element_gene,mRNA,exon;Chr4			hypo	#N/A
Chr5	22703648	22703648	-	1.11893e-09	1.59096e-05	-40	NONE				hypo	#N/A
Chr3	5986966	5986966	-	2.9141e-09	3.66219e-05	-39.8789	AT3G17500	gene,mRNA,protein,exon,CDS;			hypo	#N/A
Chr4	2188309	2188309	-	5.81667e-06	0.00955346	-39.7681	NONE				hypo	#N/A
Chr4	5987998	5987998	+	1.03074e-06	0.00306679	-39.6226	AT4G09455	transposable_element_gene,mRNA,exon;Chr4			hypo	#N/A
Chr3	11053992	11053992	-	2.54481e-07	0.00116265	-39.611	Chr3	transposable_element,transposon_fragment;			hypo	#N/A
Chr4	16141896	16141896	+	3.63598e-13	1.24076e-08	-39.5413	AT4G33585	gene,mRNA,protein,CDS,exon;			hypo	#N/A
Chr5	10942489	10942489	-	2.4917e-08	0.000203942	-39.4277	AT5G28920	gene,mRNA,protein,CDS,exon;			hypo	#N/A
Chr4	5988369	5988369	-	4.06342e-14	1.66909e-09	-39.3444	AT4G09455	transposable_element_gene,mRNA,exon;Chr4			hypo	#N/A
Chr4	2174790	2174790	-	2.13753e-06	0.00500659	-39.2828	AT4G04407	transposable_element_gene,mRNA,exon;Chr4			hypo	#N/A
Chr4	3430115	3430115	+	2.4371e-06	0.00543836	-39.2446	NONE				hypo	#N/A
Chr5	12246559	12246559	+	5.95113e-06	0.00967757	-39.1283	AT5G32598	transposable_element_gene,mRNA,exon;Chr5			hypo	#N/A
Chr4	5988072	5988072	-	4.80895e-09	5.56027e-05	-39.0244	AT4G09455	transposable_element_gene,mRNA,exon;Chr4			hypo	#N/A
Chr5	11520638	11520638	-	9.53883e-07	0.00292321	-38.9007	AT5G31919	transposable_element_gene,mRNA,exon;Chr5			hypo	#N/A
Chr3	17842594	17842594	-	2.23267e-10	4.02624e-06	-38.7471	NONE				hypo	#N/A
Chr5	8893342	8893342	+	1.24911e-06	0.00347198	-38.7097	NONE				hypo	#N/A
Chr2	10279402	10279402	-	2.1481e-06	0.00501546	-38.6975	Chr2	transposable_element,transposon_fragment;			hypo	#N/A
Chr4	16142082	16142082	+	2.25734e-09	2.9453e-05	-38.6936	AT4G33585	gene,mRNA,protein,CDS,exon;			hypo	#N/A
Chr4	2164810	2164810	-	1.62811e-06	0.00417011	-38.3861	AT4G04402	gene,mRNA,protein;			hypo	#N/A
Chr5	19199139	19199139	+	0	0	-38.2228	AT5G47300	gene,mRNA,protein,exon,CDS;			hypo	#N/A
Chr5	11517836	11517836	-	3.70854e-06	0.00714674	-38.2134	AT5G31778	transposable_element_gene,mRNA,exon;Chr5			hypo	#N/A
Chr4	3733889	3733889	-	1.58576e-06	0.00410429	-38.0121	Chr4	transposable_element,transposon_fragment;			hypo	#N/A
Chr3	16377696	16377696	+	4.91843e-07	0.00183972	-37.9721	Chr3	transposable_element,transposon_fragment;			hypo	#N/A
Chr4	3512524	3512524	-	5.13035e-06	0.00882141	-37.9487	AT4G06568	transposable_element_gene,mRNA,exon;			hypo	#N/A
Chr2	796057	796057	-	2.42249e-09	3.13215e-05	-37.9048	AT2G02795	gene,mRNA,protein,exon,CDS;AT2G02800	unknown protein		hypo	#N/A
Chr4	5988078	5988078	-	9.35883e-09	9.5224e-05	-37.8049	AT4G09455	transposable_element_gene,mRNA,exon;Chr4			hypo	#N/A
Chr5	8204213	8204213	+	1.87793e-10	3.43781e-06	-37.7186	AT5G24200	gene,mRNA,protein,exon,CDS;			hypo	#N/A
Chr3	5986953	5986953	-	3.42667e-11	7.71644e-07	-37.6898	AT3G17500	gene,mRNA,protein,exon,CDS;			hypo	#N/A
Chr2	2527719	2527719	-	5.53552e-06	0.00925619	-37.6352	AT2G06400	transposable_element_gene,mRNA,exon;Chr2	non-LTR retrotransposon family (LINE), has a 1.2e-27 P-value blast match to GB:NP_038603 L1 repeat, Tf subfamily, member 23 (LINE-element) (Mus musculus)		hypo	#N/A
Chr2	2946238	2946238	-	1.93889e-06	0.00471029	-37.5889	NONE				hypo	#N/A
Chr5	11464772	11464772	+	3.5525e-08	0.000265313	-37.3803	AT5G31845	transposable_element_gene,mRNA,exon;Chr5			hypo	#N/A
Chr5	19199121	19199121	+	0	0	-37.2874	AT5G47300	gene,mRNA,protein,exon,CDS;			hypo	#N/A
Chr2	5752154	5752154	-	3.40074e-07	0.00141258	-37.2703	Chr2	transposable_element,transposon_fragment;			hypo	#N/A
Chr3	15916248	15916248	+	7.16108e-08	0.000457752	-37.2549	NONE				hypo	#N/A
Chr1	17713868	17713868	+	3.3989e-08	0.000258372	-37.21	Chr1	transposable_element,transposon_fragment;			hypo	#N/A
Chr1	24857361	24857361	+	5.9423e-07	0.00211744	-37.2074	NONE				hypo	#N/A
Chr4	12599014	12599014	-	3.38505e-06	0.00672805	-37.0738	AT4G24300	gene,mRNA,protein,CDS,exon;			hypo	#N/A
Chr2	10547869	10547869	-	1.56514e-06	0.00407231	-37.0427	AT2G24755	gene,ncRNA,exon;AT2G24760	transposable_element,transposon_fragment;		hypo	#N/A
Chr1	10545195	10545195	-	2.72499e-07	0.0012223	-36.9424	AT1G30060	gene,mRNA,protein,CDS,exon;	COP1-interacting protein-related		hypo	#N/A
Chr1	13042953	13042953	-	1.54735e-06	0.00403785	-36.823	NONE				hypo	#N/A
Chr5	7344605	7344605	+	2.0824e-07	0.00100285	-36.7375	AT5G22150	gene,mRNA,protein;			hypo	#N/A
Chr3	7902209	7902209	+	1.86577e-06	0.00458554	-36.649	AT3G22350	gene,mRNA,protein,exon,CDS;			hypo	#N/A
Chr2	5346016	5346016	-	1.13626e-07	0.000642945	-36.619	AT2G13000	transposable_element_gene,mRNA,exon;Chr2	CACTA-like transposase family (Tnp2/En/Spm), has a 9.0e-151 P-value blast match to GB:CAA40555 TNP2 (CACTA-element) (Antirrhinum majus)		hypo	#N/A
Chr2	16253474	16253474	+	4.11616e-06	0.00763701	-36.5854	NONE				hypo	#N/A
Chr4	3508066	3508066	-	1.68768e-06	0.00427333	-36.5838	AT4G06566	transposable_element_gene,mRNA,exon;Chr4			hypo	#N/A
Chr4	5988003	5988003	+	3.45257e-06	0.00682544	-36.5385	AT4G09455	transposable_element_gene,mRNA,exon;Chr4			hypo	#N/A
Chr4	2763438	2763438	-	2.72749e-06	0.00582966	-36.4726	AT4G05470	gene,mRNA,protein,CDS,exon;			hypo	#N/A
Chr4	2188846	2188846	+	7.77123e-08	0.000485559	-36.4503	NONE				hypo	#N/A
Chr5	19549396	19549396	+	4.27734e-06	0.0078243	-36.4255	Chr5	transposable_element,transposon_fragment;			hypo	#N/A
Chr3	3542896	3542896	-	1.33636e-09	1.85842e-05	-36.386	AT3G11310	gene,mRNA,protein,CDS,exon;			hypo	#N/A
Chr1	26395178	26395178	-	4.55895e-06	0.00815829	-36.3636	AT1G70080	gene,mRNA,protein,CDS,exon;	Terpenoid cyclases/Protein prenyltransferases superfamily protein		hypo	#N/A
Chr5	19965125	19965125	-	1.11022e-16	5.93394e-12	-36.3566	NONE				hypo	#N/A
Chr3	16829843	16829843	-	3.12499e-06	0.00637382	-36.3071	AT3G45800	gene,mRNA,protein,CDS,exon;			hypo	#N/A
Chr3	15007032	15007032	-	4.58412e-07	0.0017411	-36.2803	AT3G42940	gene,mRNA,protein,exon,CDS;			hypo	#N/A
Chr5	9275398	9275398	-	5.93441e-07	0.00211744	-36.2393	AT5G26642	transposable_element_gene,mRNA,exon;Chr5			hypo	#N/A
Chr5	7554165	7554165	-	1.20287e-06	0.00338252	-36.2166	NONE				hypo	#N/A
Chr3	14084147	14084147	+	3.04179e-10	5.19e-06	-36.1944	AT3G33528	gene,mRNA,five_prime_UTR,exon;			hypo	#N/A
Chr5	1511379	1511379	-	3.87639e-07	0.0015354	-36.1147	AT5G05120	gene,mRNA,protein,exon,CDS;			hypo	#N/A
Chr5	22705281	22705281	-	2.94453e-07	0.00128695	-36.1111	AT5G56061	pseudogene,pseudogenic_transcript,pseudogenic_exon;			hypo	#N/A
Chr1	10545180	10545180	-	1.85476e-07	0.000931831	-36.0048	AT1G30060	gene,mRNA,protein,CDS,exon;	COP1-interacting protein-related		hypo	#N/A
Chr1	13353236	13353236	+	2.97494e-11	6.83805e-07	-36	NONE				hypo	#N/A
Chr1	16042918	16042918	+	1.4644e-06	0.00388868	-35.9979	Chr1	transposable_element;			hypo	#N/A
Chr3	16829286	16829286	-	6.24313e-06	0.00993392	-35.9759	NONE				hypo	#N/A
Chr5	13773822	13773822	-	1.18775e-06	0.00336038	-35.9635	Chr5	transposable_element,transposon_fragment;			hypo	#N/A
Chr3	20728881	20728881	+	2.4957e-07	0.00114493	-35.7938	AT3G55860	gene,mRNA,protein,CDS,exon;			hypo	#N/A
Chr5	9636647	9636647	-	7.64314e-07	0.00250773	-35.7592	AT5G27340	gene,mRNA,protein,exon,CDS;			hypo	#N/A
Chr1	16891057	16891057	-	1.62128e-06	0.00416335	-35.7561	NONE				hypo	#N/A
Chr4	3628680	3628680	-	1.98069e-06	0.00477539	-35.6875	AT4G06592	transposable_element_gene,mRNA,exon;Chr4			hypo	#N/A
Chr4	3104168	3104168	+	6.11012e-06	0.00981734	-35.6863	AT4G06487	transposable_element_gene,mRNA,exon;Chr4			hypo	#N/A
Chr1	12497667	12497667	+	3.41235e-06	0.00677612	-35.6709	NONE				hypo	#N/A
Chr4	2790814	2790814	-	2.8017e-06	0.00592982	-35.6111	AT4G05510	transposable_element_gene,mRNA,exon;Chr4			hypo	#N/A
Chr3	3542920	3542920	-	1.2157e-09	1.71209e-05	-35.6035	AT3G11310	gene,mRNA,protein,CDS,exon;			hypo	#N/A
Chr5	12495716	12495716	-	3.21763e-07	0.00136203	-35.5817	Chr5	transposable_element,transposon_fragment;			hypo	#N/A
Chr3	14976958	14976958	-	7.1017e-08	0.000454611	-35.5259	AT3G42910	transposable_element_gene,mRNA,exon;			hypo	#N/A
Chr4	5084256	5084256	+	3.79834e-11	8.42509e-07	-35.4309	AT4G08110	transposable_element_gene,mRNA,exon;Chr4			hypo	#N/A
Chr2	1402374	1402374	-	4.03226e-07	0.00158069	-35.4012	AT2G04160	gene,mRNA,protein,CDS,exon;	Subtilisin-like serine endopeptidase family protein		hypo	#N/A
Chr3	11856366	11856366	-	6.42346e-09	7.03599e-05	-35.3694	AT3G30213	transposable_element_gene,mRNA,exon;Chr3			hypo	#N/A
Chr3	17114036	17114036	+	1.37233e-06	0.00371816	-35.3512	AT3G46487	transposable_element_gene,mRNA,exon;Chr3			hypo	#N/A
Chr3	7041358	7041358	+	3.55271e-15	1.659e-10	-35.2682	Chr3	transposable_element,transposon_fragment;			hypo	#N/A
Chr2	1469695	1469695	-	2.5028e-06	0.00552935	-35.266	AT2G04250	pseudogene,pseudogenic_transcript,pseudogenic_exon;	pseudogene, hypothetical protein		hypo	#N/A
Chr4	2308834	2308834	+	3.41183e-09	4.14477e-05	-35.2092	NONE				hypo	#N/A
Chr2	6074069	6074069	+	3.30391e-06	0.00661707	-35.1648	Chr2	transposable_element,transposon_fragment;			hypo	#N/A
Chr2	8560813	8560813	-	1.64195e-06	0.00419589	-35.1577	NONE				hypo	#N/A
Chr4	4714729	4714729	+	2.21383e-11	5.42596e-07	-35.1285	Chr4	transposable_element,transposon_fragment;			hypo	#N/A
Chr5	13578060	13578060	-	1.14076e-07	0.000644664	-35.0649	Chr5	transposable_element,transposon_fragment;			hypo	#N/A
Chr3	7765043	7765043	+	2.26059e-08	0.000190293	-35.0316	AT3G22050	gene,mRNA,protein,exon,CDS;			hypo	#N/A
Chr1	6014220	6014220	+	3.0033e-07	0.00130013	-35.0225	NONE				hypo	#N/A
Chr3	16697782	16697782	+	7.92033e-09	8.24792e-05	-35	AT3G45525	gene,mRNA,protein,CDS,exon;			hypo	#N/A
Chr3	17393197	17393197	-	6.89707e-07	0.0023469	-34.9794	AT3G47230	transposable_element_gene,mRNA,exon;Chr3			hypo	#N/A
Chr4	9508371	9508371	-	3.70097e-07	0.00149618	-34.9417	NONE				hypo	#N/A
Chr5	11013685	11013685	-	5.88495e-06	0.0096034	-34.8485	Chr5	transposable_element,transposon_fragment;			hypo	#N/A
Chr4	5988288	5988288	-	7.61613e-14	2.96374e-09	-34.7826	AT4G09455	transposable_element_gene,mRNA,exon;Chr4			hypo	#N/A
Chr3	11502171	11502171	-	2.22618e-06	0.00515168	-34.7462	Chr3	transposable_element,transposon_fragment;			hypo	#N/A
Chr4	5987819	5987819	-	1.06342e-09	1.52671e-05	-34.7222	AT4G09455	transposable_element_gene,mRNA,exon;Chr4			hypo	#N/A
Chr2	6274772	6274772	-	1.77867e-06	0.00442542	-34.6918	AT2G14670	gene,mRNA,protein,CDS,exon;Chr2	sucrose-proton symporter 8		hypo	#N/A
Chr3	12348458	12348458	-	5.20708e-06	0.00888789	-34.6644	AT3G30722	transposable_element_gene,mRNA,exon;Chr3			hypo	#N/A
Chr3	10678574	10678574	+	2.95786e-06	0.0061326	-34.6119	NONE				hypo	#N/A
Chr2	6027576	6027576	+	1.19251e-07	0.000662935	-34.5519	AT2G14230	transposable_element_gene,mRNA,exon;Chr2	CACTA-like transposase family (Ptta/En/Spm), has a 2.0e-119 P-value blast match to At5g36655.1/81-333 CACTA-like transposase family (Ptta/En/Spm) (CACTA-element) (Arabidopsis thaliana)		hypo	#N/A
Chr2	2712795	2712795	+	1.8678e-06	0.004588	-34.4531	AT2G06780	transposable_element_gene,mRNA,exon;Chr2	non-LTR retrotransposon family (LINE), has a 5.8e-17 P-value blast match to GB:NP_038602 L1 repeat, Tf subfamily, member 18 (LINE-element) (Mus musculus)		hypo	#N/A
Chr1	13353206	13353206	+	6.7086e-11	1.41046e-06	-34.4192	NONE				hypo	#N/A
Chr3	12701240	12701240	-	2.80705e-06	0.00593131	-34.3449	NONE				hypo	#N/A
Chr1	16883685	16883685	+	5.55208e-06	0.00926989	-34.31	NONE				hypo	#N/A
Chr2	3885540	3885540	-	4.31953e-06	0.0078663	-34.3038	AT2G10200	transposable_element_gene,mRNA,exon;Chr2	gypsy-like retrotransposon family (Athila), has a 1.6e-218 P-value blast match to GB:CAA57397 Athila ORF 1 (Arabidopsis thaliana)		hypo	#N/A
Chr3	15000448	15000448	+	6.90563e-08	0.000445921	-34.2996	Chr3	transposable_element,transposon_fragment;			hypo	#N/A
Chr3	13025162	13025162	+	6.97523e-07	0.00236376	-34.2881	AT3G32031	transposable_element_gene,mRNA,exon;Chr3			hypo	#N/A
Chr1	15802404	15802404	-	3.81809e-07	0.00152459	-34.2698	AT1G42320	transposable_element_gene,mRNA,exon;Chr1	gypsy-like retrotransposon family, has a 4.9e-261 P-value blast match to GB:AAD27547 polyprotein (Gypsy_Ty3-element) (Oryza sativa subsp. indica)		hypo	#N/A
Chr3	10917742	10917742	+	4.87412e-08	0.000335754	-34.2439	AT3G28915	transposable_element_gene,mRNA,exon;Chr3			hypo	#N/A
Chr2	5791745	5791745	-	5.30543e-06	0.00899348	-34.2105	NONE				hypo	#N/A
Chr4	30200	30200	-	1.16721e-06	0.00332906	-34.2051	AT4G00070	gene,mRNA,protein;			hypo	#N/A
Chr3	11852651	11852651	+	2.33513e-09	3.02897e-05	-34.2039	Chr3	transposable_element,transposon_fragment;			hypo	#N/A
Chr4	5220152	5220152	-	3.59482e-07	0.0014671	-34.2007	Chr4	transposable_element,transposon_fragment;			hypo	#N/A
Chr4	3083888	3083888	-	3.98481e-06	0.00745882	-34.1583	Chr4	transposable_element,transposon_fragment;			hypo	#N/A
Chr1	7074505	7074505	-	1.01332e-09	1.45951e-05	-34.1578	AT1G20400	gene,mRNA,protein,CDS,exon;	Protein of unknown function (DUF1204)		hypo	#N/A
Chr1	13841410	13841410	+	2.05569e-08	0.000176462	-34.1546	AT1G36630	transposable_element_gene,mRNA,exon;	CACTA-like transposase family (Tnp1/En/Spm), has a 2.5e-213 P-value blast match to ref|NP_189784.1| TNP1-related protein (Arabidopsis thaliana) (CACTA-element)		hypo	#N/A
Chr5	14015693	14015693	-	1.54745e-07	0.000819186	-34.1474	NONE				hypo	#N/A
Chr1	16298624	16298624	-	5.74437e-06	0.00947683	-34.1331	Chr1	transposable_element,transposon_fragment;			hypo	#N/A
Chr1	11503012	11503012	+	3.78722e-06	0.00724488	-34.1324	AT1G31983	pseudogene,pseudogenic_transcript,pseudogenic_exon;	pseudogene, hypothetical protein		hypo	#N/A
Chr5	11746007	11746007	-	4.36134e-06	0.00792162	-34.1252	AT5G31855	transposable_element_gene,mRNA,exon;Chr5			hypo	#N/A
Chr3	10521943	10521943	-	1.88014e-08	0.000164836	-34.0253	NONE				hypo	#N/A
Chr3	15292775	15292775	+	2.8276e-06	0.00595624	-34.0229	NONE				hypo	#N/A
Chr5	10942614	10942614	+	1.28321e-06	0.00354304	-34.015	AT5G28920	gene,mRNA,protein;			hypo	#N/A
Chr4	3824920	3824920	-	3.87419e-06	0.00735222	-34.0084	Chr4	transposable_element,transposon_fragment;			hypo	#N/A
Chr3	14333669	14333669	-	7.86696e-09	8.2285e-05	-33.9668	AT3G42174	transposable_element_gene,mRNA,exon;Chr3			hypo	#N/A
Chr3	13218104	13218104	-	2.39113e-06	0.00536819	-33.8816	NONE				hypo	#N/A
Chr5	14083607	14083607	-	9.60023e-08	0.000567847	-33.8642	AT5G35935	transposable_element_gene,mRNA,exon;Chr5			hypo	#N/A
Chr3	16710810	16710810	-	3.76816e-06	0.00721775	-33.8603	AT3G45550	transposable_element_gene,mRNA,exon;Chr3			hypo	#N/A
Chr3	7950112	7950112	-	2.61039e-07	0.00118649	-33.8333	AT3G22421	gene,mRNA,protein,CDS,exon;			hypo	#N/A
Chr4	6105375	6105375	+	6.94635e-09	7.49766e-05	-33.8141	AT4G09660	gene,mRNA,protein,exon,CDS;			hypo	#N/A
Chr3	7738908	7738908	-	2.78206e-06	0.00590516	-33.8028	AT3G21960	gene,mRNA,protein;			hypo	#N/A
Chr2	4617604	4617604	+	1.15339e-07	0.000648499	-33.7491	Chr2	transposable_element,transposon_fragment;			hypo	#N/A
Chr2	4299560	4299560	+	1.70379e-07	0.000880928	-33.719	AT2G10910	transposable_element_gene,mRNA,exon;Chr2	non-LTR retrotransposon family (LINE), has a 1.5e-24 P-value blast match to GB:AAB41224 ORF2 (LINE-element) (Rattus norvegicus)		hypo	#N/A
Chr3	15916415	15916415	-	1.57142e-07	0.000828909	-33.6918	AT3G44210	gene,mRNA,protein;			hypo	#N/A
Chr4	1063882	1063882	-	2.03669e-10	3.68782e-06	-33.6826	NONE				hypo	#N/A
Chr3	3542803	3542803	-	1.59564e-10	2.99939e-06	-33.6615	AT3G11310	gene,mRNA,protein,CDS,exon;			hypo	#N/A
Chr3	13452613	13452613	-	1.48066e-06	0.00392383	-33.6341	AT3G32904	gene,mRNA,protein,CDS,exon;			hypo	#N/A
Chr5	18260015	18260015	-	6.168e-07	0.00217457	-33.6134	Chr5	transposable_element,transposon_fragment;			hypo	#N/A
Chr2	4497377	4497377	-	1.63241e-07	0.000848389	-33.602	AT2G11310	transposable_element_gene,mRNA,exon;Chr2	gypsy-like retrotransposon family, has a 9.3e-175 P-value blast match to GB:AAD11615 prpol (gypsy_Ty3-element) (Zea mays)		hypo	#N/A
Chr5	13472413	13472413	-	1.18687e-06	0.00336003	-33.5859	AT5G35207	transposable_element_gene,mRNA,exon;Chr5			hypo	#N/A
Chr1	16421953	16421953	+	1.6092e-06	0.00414078	-33.552	Chr1	transposable_element,transposon_fragment;			hypo	#N/A
Chr4	5988869	5988869	+	5.89626e-07	0.00211626	-33.5351	AT4G09455	transposable_element_gene,mRNA,exon;Chr4			hypo	#N/A
Chr4	4469653	4469653	+	1.57115e-06	0.00408076	-33.441	AT4G07680	transposable_element_gene,mRNA,exon;Chr4			hypo	#N/A
Chr1	13353191	13353191	+	5.52566e-10	8.72346e-06	-33.3914	NONE				hypo	#N/A
Chr3	16377711	16377711	+	7.53839e-09	7.98894e-05	-33.3859	Chr3	transposable_element,transposon_fragment;			hypo	#N/A
Chr2	3863061	3863061	-	5.56055e-06	0.00927582	-33.3726	AT2G10175	transposable_element_gene,mRNA,exon;Chr2	similar to unknown protein [Arabidopsis thaliana] (TAIR:AT3G30650.1)		hypo	#N/A
Chr1	12987862	12987862	+	5.9921e-07	0.00212827	-33.3724	Chr1	transposable_element,transposon_fragment;			hypo	#N/A
Chr2	4820911	4820911	+	1.98039e-07	0.000973154	-33.3642	AT2G11950	transposable_element_gene,mRNA,exon;Chr2	copia-like retrotransposon family, has a 1.9e-158 P-value blast match to gb|AAO73527.1| gag-pol polyprotein (Glycine max) (SIRE1) (Ty1_Copia-family)		hypo	#N/A
Chr3	22767438	22767438	-	0	0	-33.3249	Chr3	transposable_element,transposon_fragment;			hypo	#N/A
Chr3	15007030	15007030	+	1.99439e-07	0.000975126	-33.2832	AT3G42940	gene,mRNA,protein,exon,CDS;			hypo	#N/A
Chr2	6027751	6027751	-	2.60845e-10	4.55574e-06	-33.2708	AT2G14230	transposable_element_gene,mRNA,exon;Chr2	CACTA-like transposase family (Ptta/En/Spm), has a 2.0e-119 P-value blast match to At5g36655.1/81-333 CACTA-like transposase family (Ptta/En/Spm) (CACTA-element) (Arabidopsis thaliana)		hypo	#N/A
Chr1	12987855	12987855	+	1.84774e-06	0.00455634	-33.2309	Chr1	transposable_element,transposon_fragment;			hypo	#N/A
Chr3	5867424	5867424	+	6.78661e-07	0.00232664	-33.1791	AT3G17190	gene,mRNA,protein,exon,CDS;			hypo	#N/A
Chr5	10318586	10318586	+	6.16846e-06	0.00987175	-33.1717	Chr5	transposable_element;			hypo	#N/A
Chr2	5303563	5303563	-	3.71713e-06	0.00715709	-33.1639	AT2G12920	transposable_element_gene,mRNA,exon;Chr2	gypsy-like retrotransposon family, has a 1.2e-128 P-value blast match to GB:AAD19359 polyprotein (gypsy_Ty3-element) (Sorghum bicolor)		hypo	#N/A
Chr4	3361031	3361031	+	7.04815e-08	0.000452493	-33.1344	AT4G06536	gene,mRNA,protein,exon,CDS;			hypo	#N/A
Chr1	17280239	17280239	-	1.37374e-06	0.00371816	-33.0924	NONE				hypo	#N/A
Chr5	7462483	7462483	-	1.32086e-07	0.000718969	-33.0556	NONE				hypo	#N/A
Chr3	14921181	14921181	-	7.09386e-08	0.000454611	-32.971	AT3G42820	transposable_element_gene,mRNA,exon;Chr3			hypo	#N/A
Chr2	13717755	13717755	+	3.23189e-06	0.00651992	-32.9351	Chr2	transposable_element,transposon_fragment;			hypo	#N/A
Chr4	1791538	1791538	-	2.23239e-06	0.00516067	-32.823	AT4G03830	gene,mRNA,protein,exon,CDS;			hypo	#N/A
Chr5	13528351	13528351	-	4.18062e-06	0.00770309	-32.8157	AT5G35331	transposable_element_gene,mRNA,exon;Chr5			hypo	#N/A
Chr2	4529833	4529833	+	4.06044e-07	0.00158634	-32.813	Chr2	transposable_element,transposon_fragment;			hypo	#N/A
Chr4	3722753	3722753	-	1.17765e-06	0.00334677	-32.7869	NONE				hypo	#N/A
Chr3	10961955	10961955	-	4.42518e-07	0.00169233	-32.7392	NONE				hypo	#N/A
Chr1	6302669	6302669	+	6.68664e-07	0.00229948	-32.7173	AT1G18310	gene,mRNA,protein,CDS,exon;Chr1	glycosyl hydrolase family 81 protein		hypo	#N/A
Chr3	11856116	11856116	+	4.39325e-06	0.00795747	-32.6929	AT3G30213	transposable_element_gene,mRNA,exon;Chr3			hypo	#N/A
Chr4	4380598	4380598	+	4.80705e-06	0.0084322	-32.6309	AT4G07560	transposable_element_gene,mRNA,exon;Chr4			hypo	#N/A
Chr1	11871297	11871297	-	4.95011e-07	0.0018469	-32.6161	AT1G32780	gene,mRNA,protein,CDS,exon;	GroES-like zinc-binding dehydrogenase family protein		hypo	#N/A
Chr4	2840236	2840236	-	1.02844e-08	0.000101385	-32.5816	AT4G05570	transposable_element_gene,mRNA;Chr4			hypo	#N/A
Chr3	13032462	13032462	+	6.82567e-07	0.00233103	-32.5571	AT3G32030	gene,mRNA,protein,CDS,exon;			hypo	#N/A
Chr5	9442579	9442579	-	2.45995e-06	0.00547008	-32.5385	AT5G26840	gene,mRNA,protein,CDS,exon;			hypo	#N/A
Chr3	12478603	12478603	-	3.93101e-06	0.00740789	-32.4755	Chr3	transposable_element,transposon_fragment;			hypo	#N/A
Chr3	12120950	12120950	-	2.18277e-06	0.00508037	-32.3529	Chr3	transposable_element,transposon_fragment;			hypo	#N/A
Chr5	1559980	1559980	+	7.52887e-08	0.000473544	-32.3473	AT5G05260	gene,mRNA,protein,CDS,exon;			hypo	#N/A
Chr5	12465529	12465529	-	4.17427e-11	9.21288e-07	-32.2952	AT5G33210	gene,mRNA,protein;			hypo	#N/A
Chr3	15000462	15000462	+	1.5173e-07	0.000809992	-32.2864	Chr3	transposable_element,transposon_fragment;			hypo	#N/A
Chr1	10545269	10545269	-	1.22313e-09	1.7171e-05	-32.2708	AT1G30060	gene,mRNA,protein;	COP1-interacting protein-related		hypo	#N/A
Chr4	5987901	5987901	-	8.3276e-07	0.00265394	-32.2581	AT4G09455	transposable_element_gene,mRNA,exon;Chr4			hypo	#N/A
Chr4	5691016	5691016	-	4.06709e-06	0.00756179	-32.2041	AT4G08880	transposable_element_gene,mRNA,exon;Chr4			hypo	#N/A
Chr1	12032829	12032829	-	1.10133e-06	0.00321219	-32.1775	Chr1	transposable_element,transposon_fragment;			hypo	#N/A
Chr4	11039795	11039795	+	3.26194e-06	0.00656263	-32.1748	AT4G20490	transposable_element_gene,mRNA,exon;Chr4			hypo	#N/A
Chr5	10746298	10746298	+	1.89019e-09	2.52568e-05	-32.0893	NONE				hypo	#N/A
Chr4	3673262	3673262	-	1.1821e-08	0.000114001	-32.0814	NONE				hypo	#N/A
Chr3	16691252	16691252	+	5.16342e-06	0.00884741	-32.0331	AT3G45510	gene,mRNA,protein,CDS,exon;			hypo	#N/A
Chr1	12953096	12953096	-	2.00588e-06	0.00481058	-31.9711	Chr1	transposable_element,transposon_fragment;			hypo	#N/A
Chr4	4982560	4982560	+	1.54642e-06	0.00403781	-31.9663	AT4G08091	transposable_element_gene,mRNA,exon;Chr4			hypo	#N/A
Chr5	11575205	11575205	+	3.19204e-06	0.00646611	-31.9534	Chr5	transposable_element,transposon_fragment;			hypo	#N/A
Chr1	5717344	5717344	+	2.08867e-07	0.00100285	-31.9149	AT1G16710	gene,mRNA,protein,exon,CDS;	histone acetyltransferase of the CBP family 12		hypo	#N/A
Chr4	16142072	16142072	+	1.33532e-08	0.000124974	-31.7383	AT4G33585	gene,mRNA,protein,CDS,exon;			hypo	#N/A
Chr2	3656707	3656707	-	5.07472e-06	0.0087495	-31.7346	AT2G09589	transposable_element_gene,mRNA,exon;Chr2	gypsy-like retrotransposon family (Athila), has a 1.2e-32 P-value blast match to GB:CAA57397 Athila ORF 1 (Arabidopsis thaliana)		hypo	#N/A
Chr4	4099937	4099937	+	2.54221e-06	0.00558395	-31.7204	AT4G06752	transposable_element_gene,mRNA,exon;Chr4			hypo	#N/A
Chr3	15034408	15034408	+	1.06512e-08	0.000104077	-31.7152	AT3G42993	transposable_element_gene,mRNA,exon;Chr3			hypo	#N/A
Chr3	7041360	7041360	-	4.97257e-06	0.00861694	-31.679	Chr3	transposable_element,transposon_fragment;			hypo	#N/A
Chr3	6771875	6771875	+	2.5048e-06	0.005531	-31.6667	Chr3	transposable_element,transposon_fragment;			hypo	#N/A
Chr4	4499766	4499766	-	1.0218e-06	0.0030487	-31.6457	AT4G07713	transposable_element_gene,mRNA,exon;Chr4			hypo	#N/A
Chr2	3011403	3011403	-	1.11242e-07	0.000630258	-31.6376	AT2G07240	gene,mRNA,protein,CDS,exon;Chr2	cysteine-type peptidases		hypo	#N/A
Chr3	7764930	7764930	+	7.16165e-07	0.0024096	-31.6064	AT3G22050	gene,mRNA,protein,exon,CDS;			hypo	#N/A
Chr5	13696453	13696453	+	8.33894e-08	0.000511662	-31.5939	AT5G35495	transposable_element_gene,mRNA,exon;Chr5			hypo	#N/A
Chr2	1617993	1617993	-	1.38176e-06	0.00373311	-31.5904	Chr2	transposable_element,transposon_fragment;			hypo	#N/A
Chr2	6029475	6029475	-	8.85927e-08	0.000534912	-31.5803	AT2G14230	transposable_element_gene,mRNA,exon;Chr2	CACTA-like transposase family (Ptta/En/Spm), has a 2.0e-119 P-value blast match to At5g36655.1/81-333 CACTA-like transposase family (Ptta/En/Spm) (CACTA-element) (Arabidopsis thaliana)		hypo	#N/A
Chr3	3543050	3543050	+	6.12295e-09	6.7401e-05	-31.5514	AT3G11310	gene,mRNA,protein,CDS,exon;			hypo	#N/A
Chr3	6294893	6294893	-	5.66883e-07	0.0020647	-31.5079	AT3G18340	gene,mRNA,protein,exon,CDS;			hypo	#N/A
Chr5	13386971	13386971	-	1.55162e-06	0.00404663	-31.5024	AT5G35120	gene,mRNA,protein,CDS,exon;			hypo	#N/A
Chr4	5084258	5084258	-	6.79186e-07	0.00232664	-31.4921	AT4G08110	transposable_element_gene,mRNA,exon;Chr4			hypo	#N/A
Chr2	246548	246548	-	1.30759e-06	0.00358512	-31.4886	AT2G01550	transposable_element_gene,mRNA,exon;Chr2	non-LTR retrotransposon family (LINE), has a 4.9e-48 P-value blast match to GB:AAA39398 ORF2 (Mus musculus) (LINE-element)		hypo	#N/A
Chr3	13088723	13088723	+	7.23617e-07	0.00242659	-31.482	AT3G32092	transposable_element_gene,mRNA,exon;Chr3			hypo	#N/A
Chr5	11152359	11152359	-	5.70275e-07	0.00207365	-31.4663	AT5G29100	transposable_element_gene,mRNA,exon;Chr5			hypo	#N/A
Chr4	7704081	7704081	-	5.43027e-06	0.00914222	-31.4458	AT4G13264	transposable_element_gene,mRNA,exon;Chr4			hypo	#N/A
Chr2	8560642	8560642	-	1.35286e-06	0.00367744	-31.4151	Chr2	transposable_element,transposon_fragment;			hypo	#N/A
Chr5	1559944	1559944	+	1.28929e-06	0.00355251	-31.4131	AT5G05260	gene,mRNA,protein,CDS,exon;			hypo	#N/A
Chr3	12349102	12349102	-	9.70367e-07	0.00295276	-31.3953	AT3G30720	gene,mRNA,exon,five_prime_UTR;Chr3			hypo	#N/A
Chr3	7902027	7902027	+	5.4484e-06	0.00915536	-31.3889	AT3G22350	gene,mRNA,protein,exon,CDS;			hypo	#N/A
Chr3	3542812	3542812	-	2.46958e-09	3.17553e-05	-31.3716	AT3G11310	gene,mRNA,protein,CDS,exon;			hypo	#N/A
Chr1	17843244	17843244	-	2.5312e-06	0.00556712	-31.3309	AT1G48290	transposable_element_gene,mRNA,exon;Chr1	similar to unknown protein [Arabidopsis thaliana] (TAIR:AT1G43660.1)		hypo	#N/A
Chr4	5084268	5084268	+	3.75385e-10	6.23701e-06	-31.3165	AT4G08110	transposable_element_gene,mRNA,exon;Chr4			hypo	#N/A
Chr5	10318683	10318683	+	4.10183e-07	0.00159759	-31.3068	Chr5	transposable_element;			hypo	#N/A
Chr1	15797875	15797875	-	9.72461e-07	0.00295279	-31.3043	Chr1	transposable_element,transposon_fragment;			hypo	#N/A
Chr1	17056803	17056803	+	3.56611e-09	4.28726e-05	-31.2925	AT1G45120	transposable_element_gene,mRNA,exon;Chr1	copia-like retrotransposon family, has a 1.5e-294 P-value blast match to GB:CAA72989 open reading frame 1 (Ty1_Copia-element) (Brassica oleracea)		hypo	#N/A
Chr5	10724466	10724466	-	1.33428e-06	0.00363805	-31.25	NONE				hypo	#N/A
Chr5	9181998	9181998	+	4.59937e-06	0.00820482	-31.2105	Chr5	transposable_element,transposon_fragment;			hypo	#N/A
Chr2	3746654	3746654	-	4.75642e-06	0.00837983	-31.2002	Chr2	transposable_element,transposon_fragment;			hypo	#N/A
Chr4	236909	236909	-	8.85774e-08	0.000534912	-31.1845	AT4G00540	gene,mRNA,protein;			hypo	#N/A
Chr1	18053849	18053849	+	3.76922e-07	0.00151321	-31.1195	AT1G48810	transposable_element_gene,mRNA,exon;Chr1	copia-like retrotransposon family, has a 7.2e-46 P-value blast match to GB:CAA72990 open reading frame 2 (Ty1_Copia-element) (Brassica oleracea)		hypo	#N/A
Chr3	16245185	16245185	+	9.49204e-07	0.00291409	-31.0896	AT3G44705	transposable_element_gene,mRNA,exon;			hypo	#N/A
Chr5	15585346	15585346	-	2.26513e-08	0.000190314	-31.0722	AT5G38930	gene,mRNA,protein,exon,CDS;			hypo	#N/A
Chr4	6536713	6536713	+	5.97528e-10	9.26837e-06	-31.0153	Chr4	transposable_element,transposon_fragment;			hypo	#N/A
Chr5	19199106	19199106	+	1.02141e-14	4.53116e-10	-31.0136	AT5G47300	gene,mRNA,protein,exon,CDS;			hypo	#N/A
Chr5	12943133	12943133	+	1.93851e-06	0.00471029	-30.9939	AT5G34696	transposable_element_gene,mRNA,exon;Chr5			hypo	#N/A
Chr1	17590697	17590697	+	4.66161e-06	0.00826863	-30.9903	AT1G47770	gene,mRNA,protein,exon,CDS;	Beta-galactosidase related protein		hypo	#N/A
Chr3	15158610	15158610	+	7.25711e-07	0.00242973	-30.9543	Chr3	transposable_element,transposon_fragment;			hypo	#N/A
Chr5	13505527	13505527	+	5.66342e-06	0.00937115	-30.902	AT5G35260	transposable_element_gene,mRNA,exon;Chr5			hypo	#N/A
Chr4	5987785	5987785	-	3.02502e-06	0.00622692	-30.8894	AT4G09455	transposable_element_gene,mRNA,exon;Chr4			hypo	#N/A
Chr2	1936641	1936641	+	2.76079e-11	6.44601e-07	-30.8642	AT2G05320	gene,mRNA,protein,exon,CDS;	beta-1,2-N-acetylglucosaminyltransferase II		hypo	#N/A
Chr5	11534727	11534727	-	9.82151e-07	0.00297002	-30.8621	AT5G30420	pseudogene,pseudogenic_transcript,pseudogenic_exon;			hypo	#N/A
Chr4	2008949	2008949	+	3.52077e-06	0.00692214	-30.8576	AT4G04165	transposable_element_gene,mRNA,exon;Chr4			hypo	#N/A
Chr2	4811607	4811607	-	2.34707e-07	0.00109141	-30.8382	AT2G11930	pseudogene,pseudogenic_transcript,pseudogenic_exon;	pseudogene, hypothetical protein, and genefinder		hypo	#N/A
Chr2	3036636	3036636	-	3.70482e-06	0.0071452	-30.7769	NONE				hypo	#N/A
Chr2	6030069	6030069	+	2.05232e-08	0.000176462	-30.7559	AT2G14240	transposable_element_gene,mRNA,exon;Chr2	similar to unknown protein [Arabidopsis thaliana] (TAIR:AT2G13320.1)		hypo	#N/A
Chr2	1228300	1228300	+	1.84291e-07	0.000931831	-30.7371	AT2G03935	pseudogene,pseudogenic_transcript,pseudogenic_exon;	pseudogene similar to putative carboxyl-terminal proteinase		hypo	#N/A
Chr4	1865601	1865601	-	7.41666e-08	0.000468686	-30.7339	NONE				hypo	#N/A
Chr2	4413130	4413130	+	3.43752e-06	0.00680478	-30.7273	Chr2	transposable_element,transposon_fragment;			hypo	#N/A
Chr1	13308096	13308096	-	5.07062e-06	0.00874675	-30.7009	NONE				hypo	#N/A
Chr4	8901136	8901136	+	3.28306e-06	0.00659018	-30.6475	AT4G15590	transposable_element_gene,mRNA,exon;			hypo	#N/A
Chr3	16377715	16377715	+	2.92392e-07	0.00128173	-30.5941	Chr3	transposable_element,transposon_fragment;			hypo	#N/A
Chr2	1280373	1280373	-	3.86396e-07	0.00153184	-30.5601	NONE				hypo	#N/A
Chr1	17057469	17057469	-	2.60427e-08	0.000211594	-30.5556	AT1G45120	transposable_element_gene,mRNA,exon;Chr1	copia-like retrotransposon family, has a 1.5e-294 P-value blast match to GB:CAA72989 open reading frame 1 (Ty1_Copia-element) (Brassica oleracea)		hypo	#N/A
Chr2	8560819	8560819	-	4.97212e-07	0.00185356	-30.5283	NONE				hypo	#N/A
Chr4	3437855	3437855	+	4.06222e-07	0.00158634	-30.5195	AT4G06550	transposable_element_gene,mRNA,exon;Chr4			hypo	#N/A
Chr3	16887802	16887802	-	2.34823e-06	0.00531033	-30.5028	AT3G45940	gene,mRNA,protein,CDS,exon;			hypo	#N/A
Chr3	15863759	15863759	+	1.05523e-06	0.00311458	-30.4683	NONE				hypo	#N/A
Chr1	4332088	4332088	-	2.80607e-06	0.00593131	-30.4274	AT1G12720	transposable_element_gene,mRNA,exon;Chr1	Mutator-like transposase family, has a 1.2e-40 P-value blast match to GB:AAA21566 mudrA of transposon=MuDR (MuDr-element) (Zea mays)		hypo	#N/A
Chr3	10108236	10108236	+	1.35937e-06	0.00369286	-30.4002	AT3G27327	transposable_element_gene,mRNA,exon;Chr3			hypo	#N/A
Chr3	14303073	14303073	+	6.18969e-06	0.00989502	-30.3987	NONE				hypo	#N/A
Chr4	3092199	3092199	+	1.84866e-06	0.00455634	-30.3742	AT4G06485	transposable_element_gene,mRNA,exon;Chr4			hypo	#N/A
Chr1	11509392	11509392	-	1.05771e-07	0.000610963	-30.3418	AT1G32010	gene,mRNA,protein,CDS,exon;	myosin heavy chain-related		hypo	#N/A
Chr2	1600756	1600756	-	4.83861e-07	0.00181446	-30.2544	AT2G04580	transposable_element_gene,mRNA,exon;Chr2	similar to unknown protein [Arabidopsis thaliana] (TAIR:AT2G22440.1)		hypo	#N/A
Chr1	13014231	13014231	-	3.01707e-09	3.76735e-05	-30.25	AT1G35390	transposable_element_gene,mRNA,exon;	non-LTR retrotransposon family (LINE), has a 2.6e-43 P-value blast match to GB:AAA67727 reverse transcriptase (LINE-element) (Mus musculus)		hypo	#N/A
Chr4	7182482	7182482	-	3.02184e-09	3.76735e-05	-30.2326	AT4G11970	gene,mRNA,protein,exon,CDS;			hypo	#N/A
Chr5	14088111	14088111	+	3.80834e-08	0.000279711	-30.2326	AT5G35935	transposable_element_gene,mRNA,exon;Chr5			hypo	#N/A
Chr2	4333282	4333282	+	1.11908e-06	0.00325112	-30.221	AT2G10970	gene,mRNA,protein,CDS,exon;	Plant invertase/pectin methylesterase inhibitor superfamily protein		hypo	#N/A
Chr3	14921574	14921574	-	1.41096e-06	0.00377977	-30.1417	AT3G42820	transposable_element_gene,mRNA;Chr3			hypo	#N/A
Chr2	3462409	3462409	-	5.23811e-06	0.00891684	-30.1318	NONE				hypo	#N/A
Chr2	4008948	4008948	+	1.69e-06	0.00427677	-30.1007	AT2G10430	pseudogene,pseudogenic_transcript,pseudogenic_exon;	pseudogene, similar to putative reverse transcriptase, blastp match of 34% identity and 1.6e-24 P-value to GP|27311287|gb|AAO00713.1||AC078894 putative reverse transcriptase {Oryza sativa (japonica cultivar-group)}		hypo	#N/A
Chr3	15916082	15916082	+	3.53684e-12	1.01884e-07	-30.0855	NONE				hypo	#N/A
Chr4	5753563	5753563	-	3.68999e-07	0.00149493	-30.0709	AT4G08970	transposable_element_gene,mRNA,exon;Chr4			hypo	#N/A
Chr4	1759060	1759060	-	2.07567e-07	0.00100088	-30.0685	NONE				hypo	#N/A
Chr4	3650164	3650164	+	9.65158e-08	0.000569017	-30.0563	NONE				hypo	#N/A
Chr5	14087572	14087572	-	9.44182e-09	9.58e-05	-30.0227	AT5G35935	transposable_element_gene,mRNA,exon;Chr5			hypo	#N/A
Chr3	22767940	22767940	-	2.51408e-06	0.00554046	-30.0096	NONE				hypo	#N/A
Chr5	12387258	12387258	+	5.44374e-06	0.00915536	-29.902	AT5G32690	pseudogene,pseudogenic_transcript;AT5G32950	transposable_element,transposon_fragment;		hypo	#N/A
Chr4	2343066	2343066	+	2.80178e-07	0.00124792	-29.8611	NONE				hypo	#N/A
Chr4	5988105	5988105	-	5.76096e-06	0.00949006	-29.8507	AT4G09455	transposable_element_gene,mRNA,exon;Chr4			hypo	#N/A
Chr5	13226423	13226423	-	4.1553e-06	0.00767922	-29.8031	NONE				hypo	#N/A
Chr2	5102296	5102296	+	1.52982e-07	0.000813738	-29.784	AT2G12510	transposable_element_gene,mRNA,exon;Chr2	gypsy-like retrotransposon family, has a 2.8e-206 P-value blast match to GB:BAA84458 GAG-POL precursor (gypsy_Ty3-element) (Oryza sativa)gi|5902445|dbj|BAA84458.1| GAG-POL precursor (Oryza sativa (japonica cultivar-group)) (RIRE2) (Gypsy_Ty3-family)		hypo	#N/A
Chr1	7071694	7071694	+	1.84531e-07	0.000931831	-29.7833	Chr1	transposable_element,transposon_fragment;			hypo	#N/A
Chr2	4493462	4493462	-	1.52369e-07	0.000812429	-29.7749	AT2G11300	transposable_element_gene,mRNA,exon;Chr2	pseudogene, hypothetical protein, similar to GB:AAD38224		hypo	#N/A
Chr3	3542914	3542914	-	8.29739e-07	0.00264622	-29.7437	AT3G11310	gene,mRNA,protein,CDS,exon;			hypo	#N/A
Chr1	24614265	24614265	+	5.89416e-10	9.17462e-06	-29.7297	AT1G66120	gene,mRNA,protein,exon,CDS;	AMP-dependent synthetase and ligase family protein		hypo	#N/A
Chr3	5915822	5915822	+	1.52694e-08	0.000139093	-29.7277	AT3G17320	gene,mRNA,protein,CDS,exon;			hypo	#N/A
Chr5	12957114	12957114	+	2.3321e-06	0.00529731	-29.7156	AT5G34770	transposable_element_gene,mRNA,exon;Chr5			hypo	#N/A
Chr2	4490370	4490370	-	2.82186e-07	0.00125224	-29.6662	AT2G11290	transposable_element_gene,mRNA,exon;Chr2	gypsy-like retrotransposon family, has a 1.2e-92 P-value blast match to GB:AAD27547 polyprotein (Gypsy_Ty3-element) (Oryza sativa subsp. indica)		hypo	#N/A
Chr2	9379160	9379160	-	6.07986e-06	0.00980697	-29.6535	Chr2	transposable_element,transposon_fragment;			hypo	#N/A
Chr2	1936643	1936643	-	7.89506e-10	1.18726e-05	-29.6296	AT2G05320	gene,mRNA,protein,exon,CDS;	beta-1,2-N-acetylglucosaminyltransferase II		hypo	#N/A
Chr3	14955133	14955133	+	4.1732e-07	0.0016197	-29.6296	AT3G42880	gene,mRNA,protein,exon,CDS;			hypo	#N/A
Chr5	11204669	11204669	+	1.64657e-06	0.0042004	-29.6156	Chr5	transposable_element,transposon_fragment;			hypo	#N/A
Chr2	1956689	1956689	+	8.83527e-08	0.000534912	-29.6098	AT2G05360	gene,mRNA,protein;	BEST Arabidopsis thaliana protein match is: F-box associated ubiquitination effector family protein (TAIR:AT1G64295.1)		hypo	#N/A
Chr5	9721212	9721212	+	6.57442e-07	0.00227677	-29.5887	Chr5	transposable_element,transposon_fragment;			hypo	#N/A
Chr3	12815980	12815980	-	5.33618e-06	0.00903181	-29.5556	Chr3	transposable_element,transposon_fragment;			hypo	#N/A
Chr3	15916413	15916413	+	4.3091e-08	0.000305368	-29.539	AT3G44210	gene,mRNA,protein;			hypo	#N/A
Chr5	12199572	12199572	-	3.45076e-06	0.00682544	-29.5227	Chr5	transposable_element,transposon_fragment;			hypo	#N/A
Chr3	3542859	3542859	-	8.58136e-10	1.2732e-05	-29.5114	AT3G11310	gene,mRNA,protein,CDS,exon;			hypo	#N/A
Chr4	5084397	5084397	+	3.02774e-08	0.00023689	-29.4353	AT4G08110	transposable_element_gene,mRNA,exon;Chr4			hypo	#N/A
Chr2	10649199	10649199	+	1.65708e-06	0.00421994	-29.4256	AT2G25030	pseudogene,pseudogenic_transcript,pseudogenic_exon;			hypo	#N/A
Chr1	17197409	17197409	+	3.35898e-06	0.00669411	-29.424	AT1G45832	transposable_element_gene,mRNA,exon;Chr1	hAT-like transposase family (hobo/Ac/Tam3), has a 2.3e-80 P-value blast match to GB:AAD24567 transposase Tag2 (hAT-element) (Arabidopsis thaliana)		hypo	#N/A
Chr4	3005924	3005924	-	4.81413e-06	0.00843794	-29.4209	AT4G05634	transposable_element_gene,mRNA,exon;Chr4			hypo	#N/A
Chr5	22165166	22165166	-	1.32511e-11	3.4177e-07	-29.4204	NONE				hypo	#N/A
Chr2	4844069	4844069	+	2.68197e-06	0.00577001	-29.4176	AT2G12020	transposable_element_gene,mRNA,exon;Chr2	gypsy-like retrotransposon family, has a 3.4e-107 P-value blast match to f23m2 reverse transcriptase (from Dan Voytas http://www.public.iastate.edu/~voytas) (Gypsy_Ty3-family)		hypo	#N/A
Chr2	2388020	2388020	-	3.39716e-07	0.00141241	-29.4034	AT2G06130	transposable_element_gene,mRNA,exon;Chr2	Mutator-like transposase family, has a 2.7e-30 P-value blast match to O80466 /172-336 Pfam PF03108 MuDR family transposase (MuDr-element domain)		hypo	#N/A
Chr1	12652901	12652901	+	4.61013e-06	0.00821158	-29.4011	NONE				hypo	#N/A
Chr2	4665961	4665961	+	6.08613e-06	0.00980697	-29.3794	AT2G11630	pseudogene,pseudogenic_transcript,pseudogenic_exon;	pseudogene, similar to P0005C02.7, blastp match of 61% identity and 1.2e-108 P-value to GP|24414144|dbj|BAC22388.1||AP004554 P0005C02.7 {Oryza sativa (japonica cultivar-group)}		hypo	#N/A
Chr4	5949486	5949486	-	3.79279e-06	0.00724642	-29.3771	AT4G09380	transposable_element_gene,mRNA,exon;Chr4			hypo	#N/A
Chr5	12968114	12968114	+	4.58883e-07	0.0017414	-29.3552	AT5G34790	transposable_element_gene,mRNA,exon;Chr5			hypo	#N/A
Chr1	12222388	12222388	+	2.4683e-06	0.00547767	-29.3367	AT1G33720	gene,mRNA,protein;	cytochrome P450, family 76, subfamily C, polypeptide 6		hypo	#N/A
Chr5	8204215	8204215	-	1.21544e-07	0.000673148	-29.2977	AT5G24200	gene,mRNA,protein,exon,CDS;			hypo	#N/A
Chr2	796037	796037	+	1.381e-06	0.00373311	-29.2851	AT2G02795	gene,mRNA,protein,exon,CDS;AT2G02800	unknown protein		hypo	#N/A
Chr5	17253307	17253307	-	3.16606e-06	0.00643076	-29.2454	AT5G43015	transposable_element_gene,mRNA,exon;Chr5			hypo	#N/A
Chr4	3508081	3508081	-	3.62624e-07	0.00147314	-29.2419	AT4G06566	transposable_element_gene,mRNA,exon;Chr4			hypo	#N/A
Chr5	17210754	17210754	+	5.1979e-06	0.00888602	-29.23	AT5G42930	gene,mRNA,protein,CDS,exon;			hypo	#N/A
Chr5	16017918	16017918	+	5.13721e-06	0.00882512	-29.2269	NONE				hypo	#N/A
Chr2	8041608	8041608	-	5.63261e-09	6.27823e-05	-29.1667	NONE				hypo	#N/A
Chr5	11034997	11034997	+	2.36451e-06	0.0053333	-29.1667	AT5G29015	transposable_element_gene,mRNA,exon;Chr5			hypo	#N/A
Chr2	3037943	3037943	-	2.58419e-07	0.001177	-29.1625	AT2G07320	transposable_element_gene,mRNA;	similar to unknown protein [Arabidopsis thaliana] (TAIR:AT5G37880.1)		hypo	#N/A
Chr3	15813534	15813534	+	3.83325e-06	0.00730144	-29.1306	AT3G44042	transposable_element_gene,mRNA,exon;Chr3			hypo	#N/A
Chr4	3715251	3715251	-	2.95949e-06	0.0061326	-29.1221	AT4G06609	transposable_element_gene,mRNA,exon;Chr4			hypo	#N/A
Chr1	12377669	12377669	-	6.55394e-08	0.000426314	-29.1124	NONE				hypo	#N/A
Chr5	15888385	15888385	+	4.27378e-06	0.0078243	-29.0293	AT5G39690	gene,mRNA,protein;			hypo	#N/A
ChrM	315692	315692	-	3.06029e-06	0.00627649	-29.0218					hypo	#N/A
Chr2	6027811	6027811	-	1.21148e-08	0.000115827	-29.0132	AT2G14230	transposable_element_gene,mRNA,exon;Chr2	CACTA-like transposase family (Ptta/En/Spm), has a 2.0e-119 P-value blast match to At5g36655.1/81-333 CACTA-like transposase family (Ptta/En/Spm) (CACTA-element) (Arabidopsis thaliana)		hypo	#N/A
Chr5	12915341	12915341	-	5.62618e-06	0.0093324	-28.9978	NONE				hypo	#N/A
Chr3	22767585	22767585	-	5.21451e-11	1.11582e-06	-28.9912	Chr3	transposable_element,transposon_fragment;			hypo	#N/A
Chr4	5988871	5988871	-	1.02061e-06	0.0030487	-28.956	AT4G09455	transposable_element_gene,mRNA,exon;Chr4			hypo	#N/A
Chr4	1912435	1912435	+	3.25688e-06	0.00655543	-28.9474	AT4G03980	transposable_element_gene,mRNA,exon;Chr4			hypo	#N/A
Chr1	15574556	15574556	-	1.14404e-07	0.000645697	-28.94	AT1G41803	transposable_element_gene,mRNA,exon;Chr1	gypsy-like retrotransposon family, has a 2.1e-256 P-value blast match to GB:AAD27547 polyprotein (Gypsy_Ty3-element) (Oryza sativa subsp. indica)		hypo	#N/A
Chr3	10640878	10640878	+	3.11917e-06	0.00636782	-28.9314	AT3G28410	gene,mRNA,protein,CDS,exon;			hypo	#N/A
Chr3	13952283	13952283	+	1.28746e-07	0.000706857	-28.9263	AT3G33142	transposable_element_gene,mRNA,exon;Chr3			hypo	#N/A
Chr5	13933206	13933206	-	1.52964e-11	3.88064e-07	-28.9225	NONE				hypo	#N/A
Chr1	14006652	14006652	-	7.70196e-07	0.00251416	-28.9091	NONE				hypo	#N/A
Chr1	17324617	17324617	-	1.91213e-08	0.000166652	-28.8303	AT1G47265	gene,mRNA,protein,exon,CDS;	unknown protein		hypo	#N/A
Chr3	12941685	12941685	+	9.92778e-07	0.0029885	-28.8266	AT3G31940	transposable_element_gene,mRNA,exon;Chr3			hypo	#N/A
Chr5	14084001	14084001	-	3.30751e-09	4.05325e-05	-28.8008	AT5G35935	transposable_element_gene,mRNA,exon;Chr5			hypo	#N/A
Chr3	18193116	18193116	+	0	0	-28.7998	AT3G49070	gene,mRNA,protein,CDS,exon;			hypo	#N/A
Chr5	10280511	10280511	-	1.45541e-06	0.00387544	-28.7954	AT5G28290	gene,mRNA,protein,CDS,exon;			hypo	#N/A
Chr3	20487407	20487407	-	4.78971e-06	0.00841407	-28.7807	NONE				hypo	#N/A
Chr2	4617244	4617244	-	3.43167e-06	0.00679624	-28.7802	Chr2	transposable_element,transposon_fragment;			hypo	#N/A
Chr2	2527935	2527935	-	7.22641e-07	0.00242659	-28.7802	NONE				hypo	#N/A
Chr2	9382375	9382375	-	1.08269e-07	0.00061843	-28.7561	Chr2	transposable_element,transposon_fragment;			hypo	#N/A
Chr3	15218040	15218040	-	1.93085e-06	0.00469865	-28.7541	AT3G43251	pseudogene,pseudogenic_transcript;			hypo	#N/A
Chr5	7332328	7332328	-	1.95978e-11	4.85696e-07	-28.75	AT5G22110	gene,mRNA,protein,CDS,exon;			hypo	#N/A
Chr4	3489930	3489930	+	1.75768e-06	0.00439702	-28.7483	AT4G06561	transposable_element_gene,mRNA,exon;Chr4			hypo	#N/A
Chr2	10186147	10186147	+	4.67302e-07	0.00176635	-28.7252	AT2G23945	gene,mRNA,protein,CDS,exon;	Eukaryotic aspartyl protease family protein		hypo	#N/A
Chr4	249202	249202	+	7.9568e-07	0.00256899	-28.6957	AT4G00580	gene,mRNA,protein,exon,CDS;			hypo	#N/A
Chr1	24482357	24482357	-	1.23083e-06	0.00343189	-28.6344	NONE				hypo	#N/A
Chr2	5212365	5212365	-	2.80886e-08	0.000222512	-28.6231	AT2G12720	transposable_element_gene,mRNA,exon;Chr2	Mutator-like transposase family, has a 7.6e-66 P-value blast match to O22273 /233-373 Pfam PF03108 MuDR family transposase (MuDr-element domain)		hypo	#N/A
Chr5	26259765	26259765	-	1.29116e-08	0.000122129	-28.6178	AT5G65676	transposable_element_gene,mRNA,exon;Chr5			hypo	#N/A
Chr3	11121951	11121951	+	1.07851e-06	0.00316645	-28.5765	Chr3	transposable_element,transposon_fragment;			hypo	#N/A
Chr3	11975867	11975867	-	5.02291e-09	5.73541e-05	-28.5714	AT3G30380	gene,mRNA,protein;			hypo	#N/A
Chr2	4496403	4496403	-	3.99092e-08	0.000289763	-28.5621	AT2G11310	transposable_element_gene,mRNA,exon;Chr2	gypsy-like retrotransposon family, has a 9.3e-175 P-value blast match to GB:AAD11615 prpol (gypsy_Ty3-element) (Zea mays)		hypo	#N/A
Chr1	21872127	21872127	-	2.71548e-06	0.00581428	-28.5617	Chr1	transposable_element,transposon_fragment;			hypo	#N/A
Chr5	12970432	12970432	+	7.71643e-09	8.13102e-05	-28.5451	AT5G34795	pseudogene,pseudogenic_transcript,pseudogenic_exon;Chr5			hypo	#N/A
Chr2	4490802	4490802	+	2.86195e-06	0.00599442	-28.5294	Chr2	transposable_element,transposon_fragment;			hypo	#N/A
Chr1	16274199	16274199	+	4.50278e-09	5.25664e-05	-28.4946	NONE				hypo	#N/A
Chr3	22767684	22767684	-	2.08005e-06	0.00490908	-28.4914	Chr3	transposable_element,transposon_fragment;			hypo	#N/A
Chr4	18583984	18583984	-	2.83147e-09	3.57862e-05	-28.4898	AT4G40100	gene,mRNA,protein,exon,CDS;			hypo	#N/A
Chr4	12841975	12841975	-	1.31385e-08	0.000124011	-28.4885	NONE				hypo	#N/A
Chr1	19714198	19714198	+	1.16567e-07	0.000651276	-28.485	NONE				hypo	#N/A
Chr2	4493195	4493195	-	2.308e-06	0.00526142	-28.4843	AT2G11300	transposable_element_gene,mRNA,exon;Chr2	pseudogene, hypothetical protein, similar to GB:AAD38224		hypo	#N/A
Chr1	14199285	14199285	+	1.60135e-09	2.17912e-05	-28.4504	AT1G37190	transposable_element_gene,mRNA,exon;Chr1	pseudogene, hypothetical protein, contains similarity to hypothetical proteins from (Arabidopsis thaliana)		hypo	#N/A
Chr3	7749257	7749257	-	1.52975e-07	0.000813738	-28.4452	AT3G21990	gene,mRNA,exon,five_prime_UTR;			hypo	#N/A
Chr3	13240150	13240150	+	6.52491e-08	0.000425048	-28.4409	AT3G32280	gene,mRNA,protein,exon,CDS;			hypo	#N/A
Chr3	14882512	14882512	+	4.27121e-06	0.0078243	-28.4314	Chr3	transposable_element,transposon_fragment;			hypo	#N/A
Chr5	12979902	12979902	-	4.77407e-08	0.000332885	-28.4224	AT5G34825	transposable_element_gene,mRNA,exon;Chr5			hypo	#N/A
Chr1	9465035	9465035	+	5.18534e-06	0.00887469	-28.4208	AT1G27220	gene,mRNA,protein;	paired amphipathic helix repeat-containing protein		hypo	#N/A
Chr5	10373919	10373919	-	1.24117e-07	0.000683986	-28.4092	AT5G28450	gene,mRNA,protein,CDS,exon;			hypo	#N/A
Chr1	11371067	11371067	-	8.10865e-07	0.00260111	-28.4053	AT1G31750	gene,mRNA,protein,CDS,exon;	proline-rich family protein		hypo	#N/A
Chr5	2374577	2374577	+	5.0294e-08	0.000341959	-28.3751	AT5G07505	transposable_element_gene,mRNA,exon;Chr5			hypo	#N/A
Chr4	1774939	1774939	+	7.60906e-07	0.00250325	-28.3666	NONE				hypo	#N/A
Chr5	15585320	15585320	-	6.87537e-10	1.04454e-05	-28.3525	AT5G38930	gene,mRNA,protein,exon,CDS;			hypo	#N/A
Chr3	15863246	15863246	+	2.09513e-06	0.00492666	-28.3333	NONE				hypo	#N/A
Chr5	12068019	12068019	+	2.011e-07	0.000979276	-28.3235	AT5G32433	transposable_element_gene,mRNA,exon;Chr5			hypo	#N/A
Chr3	10094569	10094569	-	3.16768e-06	0.00643076	-28.3019	NONE				hypo	#N/A
Chr5	12970395	12970395	+	4.25658e-08	0.000303098	-28.296	AT5G34795	pseudogene,pseudogenic_transcript,pseudogenic_exon;Chr5			hypo	#N/A
Chr3	11098682	11098682	+	3.45612e-06	0.00682942	-28.2848	AT3G29120	transposable_element_gene,mRNA,exon;Chr3			hypo	#N/A
Chr2	5256287	5256287	+	3.00987e-07	0.00130013	-28.2815	AT2G12800	transposable_element_gene,mRNA,exon;Chr2	gypsy-like retrotransposon family (Athila), has a 5.0e-230 P-value blast match to GB:CAA57397 Athila ORF 1 (Arabidopsis thaliana)		hypo	#N/A
Chr5	12940881	12940881	-	1.99974e-06	0.00480975	-28.241	AT5G34686	transposable_element_gene,mRNA,exon;Chr5			hypo	#N/A
Chr2	2325989	2325989	+	2.08917e-06	0.0049167	-28.2192	AT2G05995	gene,ncRNA;Chr2	other RNA		hypo	#N/A
Chr1	15962977	15962977	+	1.55874e-09	2.12765e-05	-28.2091	AT1G42520	transposable_element_gene,mRNA,exon;Chr1	CACTA-like transposase family (Ptta/En/Spm), has a 5.3e-69 P-value blast match to At5g36655.1/81-333 CACTA-like transposase family (Ptta/En/Spm) (CACTA-element) (Arabidopsis thaliana)		hypo	#N/A
Chr4	2973807	2973807	-	1.74995e-07	0.000895401	-28.2051	AT4G05613	transposable_element_gene,mRNA,exon;Chr4			hypo	#N/A
Chr2	6233415	6233415	-	2.23678e-07	0.00105114	-28.199	Chr2	transposable_element,transposon_fragment;			hypo	#N/A
Chr3	14926462	14926462	+	1.57893e-06	0.00409377	-28.1924	AT3G42820	transposable_element_gene,mRNA,exon;Chr3			hypo	#N/A
Chr5	15581877	15581877	+	3.96472e-08	0.000289078	-28.143	AT5G38920	gene,mRNA,protein,CDS,exon;			hypo	#N/A
Chr1	12759417	12759417	-	1.88808e-06	0.00462756	-28.1381	AT1G34967	transposable_element_gene,mRNA,exon;Chr1	copia-like retrotransposon family, has a 8.6e-83 P-value blast match to GB:CAA72989 open reading frame 1 (Ty1_Copia-element) (Brassica oleracea)		hypo	#N/A
Chr4	4302673	4302673	+	5.8439e-07	0.00210502	-28.1266	AT4G07502	transposable_element_gene,mRNA,exon;Chr4			hypo	#N/A
Chr2	2742089	2742089	-	1.30537e-06	0.00358512	-28.1068	AT2G06830	transposable_element_gene,mRNA,exon;Chr2	copia-like retrotransposon family, has a 0. P-value blast match to dbj|BAA78425.1| polyprotein (Arabidopsis thaliana) (AtRE1) (Ty1_Copia-element)		hypo	#N/A
Chr3	8714828	8714828	+	3.53415e-08	0.000264388	-28.096	NONE				hypo	#N/A
Chr3	22767409	22767409	-	2.74701e-11	6.44601e-07	-28.0731	Chr3	transposable_element,transposon_fragment;			hypo	#N/A
Chr3	12065294	12065294	-	4.46214e-06	0.00804019	-28.0706	AT3G30430	gene,mRNA,protein,exon,CDS;			hypo	#N/A
Chr3	15350914	15350914	+	5.16139e-07	0.00190671	-28.0637	AT3G43425	transposable_element_gene,mRNA,exon;Chr3			hypo	#N/A
Chr3	17393123	17393123	-	3.17127e-07	0.00135037	-28.0387	AT3G47230	transposable_element_gene,mRNA,exon;Chr3			hypo	#N/A
Chr2	6560249	6560249	+	2.31964e-06	0.00527712	-28.0348	NONE				hypo	#N/A
Chr4	2402327	2402327	+	2.82278e-07	0.00125224	-28.0303	AT4G04730	gene,mRNA,protein,CDS,exon;			hypo	#N/A
Chr3	12680346	12680346	-	3.56546e-07	0.00146049	-28.0289	AT3G31312	transposable_element_gene,mRNA,exon;Chr3			hypo	#N/A
Chr2	1748085	1748085	-	6.88238e-07	0.00234498	-28.0196	AT2G04970	transposable_element_gene,mRNA,exon;Chr2	similar to heat shock protein binding [Arabidopsis thaliana] (TAIR:AT1G32830.1)		hypo	#N/A
Chr1	21335618	21335618	+	7.47778e-08	0.000471876	-28.0141	Chr1	transposable_element,transposon_fragment;			hypo	#N/A
Chr5	7462476	7462476	-	1.15516e-07	0.000648672	-28	NONE				hypo	#N/A
Chr5	10280668	10280668	-	3.19229e-06	0.00646611	-28	AT5G28290	gene,mRNA,protein;			hypo	#N/A
Chr3	12705185	12705185	-	8.77878e-08	0.000533485	-27.9332	Chr3	transposable_element,transposon_fragment;			hypo	#N/A
Chr5	8504390	8504390	-	1.13318e-06	0.00327706	-27.9073	AT5G24775	transposable_element_gene,mRNA,exon;Chr5			hypo	#N/A
Chr5	19965130	19965130	-	5.36621e-10	8.50199e-06	-27.8995	NONE				hypo	#N/A
Chr5	11432619	11432619	+	7.127e-07	0.00240303	-27.8891	AT5G31662	transposable_element_gene,mRNA,exon;Chr5			hypo	#N/A
Chr1	13720904	13720904	-	2.02464e-07	0.000983757	-27.8639	AT1G36420	transposable_element_gene,mRNA,exon;Chr1	gypsy-like retrotransposon family, has a 0.00011 P-value blast match to GB:AAD22153 polyprotein (Gypsy_Ty3-element) (Sorghum bicolor)		hypo	#N/A
Chr5	12969756	12969756	+	5.24639e-06	0.00892409	-27.8541	AT5G34795	pseudogene,pseudogenic_transcript,pseudogenic_exon;			hypo	#N/A
Chr4	5988359	5988359	+	2.73562e-08	0.000218662	-27.8351	AT4G09455	transposable_element_gene,mRNA,exon;Chr4			hypo	#N/A
Chr4	4949536	4949536	-	1.38738e-06	0.0037369	-27.8222	Chr4	transposable_element,transposon_fragment;			hypo	#N/A
Chr4	3140130	3140130	+	5.05613e-07	0.00187723	-27.8002	AT4G06497	transposable_element_gene,mRNA,exon;			hypo	#N/A
Chr3	11856893	11856893	-	3.23186e-13	1.12891e-08	-27.7964	AT3G30213	transposable_element_gene,mRNA,exon;Chr3			hypo	#N/A
Chr2	11123753	11123753	+	1.8546e-07	0.000931831	-27.7744	AT2G26120	gene,mRNA,protein,exon,CDS;			hypo	#N/A
Chr3	22241433	22241433	+	3.46582e-09	4.178e-05	-27.7685	NONE				hypo	#N/A
Chr4	4440142	4440142	-	8.06262e-08	0.000499719	-27.7626	AT4G07660	transposable_element_gene,mRNA,exon;Chr4			hypo	#N/A
Chr5	15498364	15498364	-	3.22511e-06	0.0065136	-27.7496	Chr5	transposable_element,transposon_fragment;			hypo	#N/A
Chr4	1938865	1938865	+	7.48862e-07	0.00248103	-27.746	NONE				hypo	#N/A
Chr2	6027755	6027755	-	1.71179e-07	0.00088196	-27.7195	AT2G14230	transposable_element_gene,mRNA,exon;Chr2	CACTA-like transposase family (Ptta/En/Spm), has a 2.0e-119 P-value blast match to At5g36655.1/81-333 CACTA-like transposase family (Ptta/En/Spm) (CACTA-element) (Arabidopsis thaliana)		hypo	#N/A
Chr3	5815318	5815318	+	3.25101e-11	7.39596e-07	-27.7024	AT3G17050	transposable_element_gene,mRNA,exon;Chr3			hypo	#N/A
Chr5	11580774	11580774	+	2.62554e-10	4.56761e-06	-27.6625	AT5G31980	transposable_element_gene,mRNA,exon;Chr5			hypo	#N/A
Chr3	14887251	14887251	-	3.86161e-06	0.00734285	-27.6164	Chr3	transposable_element;			hypo	#N/A
Chr1	16475344	16475344	-	1.81632e-06	0.00449892	-27.6073	Chr1	transposable_element,transposon_fragment;			hypo	#N/A
Chr3	11975773	11975773	+	5.5548e-09	6.2161e-05	-27.6018	AT3G30380	gene,mRNA,protein,exon,CDS;			hypo	#N/A
Chr3	13423134	13423134	+	2.88059e-08	0.000226978	-27.5947	Chr3	transposable_element,transposon_fragment;			hypo	#N/A
Chr3	14537989	14537989	-	4.16813e-06	0.00768841	-27.5946	Chr3	transposable_element,transposon_fragment;			hypo	#N/A
Chr5	12361955	12361955	+	2.41943e-06	0.00541333	-27.5711	AT5G32690	pseudogene,pseudogenic_transcript;AT5G32850	transposable_element,transposon_fragment;		hypo	#N/A
Chr1	958839	958839	-	4.29519e-07	0.00165546	-27.5689	AT1G03810	gene,mRNA,protein,exon,CDS;	Nucleic acid-binding, OB-fold-like protein		hypo	#N/A
Chr2	5338842	5338842	+	3.51507e-07	0.00144653	-27.568	AT2G12980	transposable_element_gene,mRNA,exon;Chr2	CACTA-like transposase family (Ptta/En/Spm), has a 6.5e-99 P-value blast match to At5g36655.1/81-333 CACTA-like transposase family (Ptta/En/Spm) (CACTA-element) (Arabidopsis thaliana)		hypo	#N/A
Chr2	3916103	3916103	+	8.07635e-07	0.00259625	-27.5621	AT2G10240	transposable_element_gene,mRNA,exon;Chr2	pseudogene, similar to putative helicase, PIF1 family of mitochondrial helicases		hypo	#N/A
Chr4	16142099	16142099	+	3.27164e-09	4.0204e-05	-27.548	AT4G33585	gene,mRNA,protein,CDS,exon;			hypo	#N/A
Chr4	1725615	1725615	-	3.55319e-06	0.00697154	-27.5469	NONE				hypo	#N/A
Chr1	13014229	13014229	+	3.24928e-07	0.00137019	-27.4868	AT1G35390	transposable_element_gene,mRNA,exon;	non-LTR retrotransposon family (LINE), has a 2.6e-43 P-value blast match to GB:AAA67727 reverse transcriptase (LINE-element) (Mus musculus)		hypo	#N/A
Chr3	14583516	14583516	+	9.29526e-08	0.000552757	-27.4741	Chr3	transposable_element,transposon_fragment;			hypo	#N/A
Chr5	13042535	13042535	+	2.99076e-06	0.00617385	-27.4689	AT5G34846	transposable_element_gene,mRNA,exon;Chr5			hypo	#N/A
Chr5	11087185	11087185	-	2.67161e-06	0.00575889	-27.4606	AT5G29037	transposable_element_gene,mRNA,exon;Chr5			hypo	#N/A
Chr1	13084791	13084791	+	3.5486e-06	0.00696807	-27.4386	AT1G35520	gene,mRNA,protein,CDS,exon;	auxin response factor 15		hypo	#N/A
Chr5	10510568	10510568	+	7.78605e-07	0.00253343	-27.395	Chr5	transposable_element,transposon_fragment;			hypo	#N/A
Chr5	14083982	14083982	-	7.71572e-07	0.00251562	-27.3901	AT5G35935	transposable_element_gene,mRNA,exon;Chr5			hypo	#N/A
Chr2	4199103	4199103	+	5.87689e-06	0.00960217	-27.3879	Chr2	transposable_element,transposon_fragment;			hypo	#N/A
Chr3	5915824	5915824	-	1.23882e-06	0.00344987	-27.381	AT3G17320	gene,mRNA,protein,CDS,exon;			hypo	#N/A
Chr4	7013306	7013306	+	2.7281e-06	0.00582966	-27.3798	NONE				hypo	#N/A
Chr5	15579339	15579339	-	1.63763e-06	0.00418964	-27.3794	AT5G38910	gene,mRNA,protein,exon,CDS;			hypo	#N/A
Chr5	21192917	21192917	-	1.07336e-07	0.000615997	-27.314	NONE				hypo	#N/A
Chr5	14083469	14083469	-	1.86604e-09	2.50852e-05	-27.2925	AT5G35935	transposable_element_gene,mRNA,exon;Chr5			hypo	#N/A
Chr4	3335905	3335905	+	6.58425e-07	0.0022784	-27.2777	NONE				hypo	#N/A
Chr5	11038118	11038118	-	2.68412e-06	0.00577184	-27.2727	AT5G29015	transposable_element_gene,mRNA,exon;Chr5			hypo	#N/A
Chr4	1938888	1938888	+	3.71902e-07	0.00149965	-27.2614	NONE				hypo	#N/A
Chr2	3103935	3103935	-	3.74192e-06	0.00718836	-27.2581	Chr2	transposable_element,transposon_fragment;			hypo	#N/A
Chr5	15601284	15601284	-	1.98539e-07	0.00097429	-27.2555	Chr5	transposable_element,transposon_fragment;			hypo	#N/A
Chr3	10641758	10641758	+	4.01709e-08	0.000290712	-27.2373	AT3G28410	gene,mRNA,protein,CDS,exon;			hypo	#N/A
Chr5	10942461	10942461	+	3.28126e-08	0.00025184	-27.2358	AT5G28920	gene,mRNA,protein,CDS,exon;			hypo	#N/A
Chr1	18644791	18644791	-	6.19997e-08	0.00040929	-27.2251	AT1G50330	pseudogene,pseudogenic_transcript,pseudogenic_exon;	pseudogene, similar to pectin methylesterase, blastp match of 57% identity and 9.8e-69 P-value to GP|20269071|emb|CAD29733.1||AJ441325 pectin methylesterase {Sesbania rostrata}		hypo	#N/A
Chr2	5038961	5038961	+	8.09488e-08	0.000500844	-27.198	AT2G12440	transposable_element_gene,mRNA,exon;	pseudogene, similar to putative reverse transcriptase, blastp match of 29% identity and 8.8e-79 P-value to GP|27311287|gb|AAO00713.1||AC078894 putative reverse transcriptase {Oryza sativa (japonica cultivar-group)}		hypo	#N/A
Chr4	3442142	3442142	+	1.56791e-06	0.00407711	-27.196	Chr4	transposable_element,transposon_fragment;			hypo	#N/A
Chr4	3820655	3820655	+	3.21615e-06	0.00650296	-27.1945	AT4G06650	transposable_element_gene,mRNA,exon;Chr4			hypo	#N/A
Chr2	5300305	5300305	-	6.55553e-07	0.002272	-27.1808	AT2G12910	transposable_element_gene,mRNA,exon;Chr2	pseudogene, hypothetical protein		hypo	#N/A
Chr2	3901831	3901831	-	1.09323e-07	0.00062177	-27.1573	Chr2	transposable_element,transposon_fragment;			hypo	#N/A
Chr2	3116299	3116299	+	2.48257e-08	0.000203942	-27.1451	AT2G07483	transposable_element_gene,mRNA,exon;Chr2	CACTA-like transposase family (Tnp1/En/Spm), has a 7.6e-13 P-value blast match to ref|NP_189784.1| TNP1-related protein (Arabidopsis thaliana) (CACTA-element)		hypo	#N/A
Chr4	5988255	5988255	-	1.91657e-09	2.55324e-05	-27.1413	AT4G09455	transposable_element_gene,mRNA,exon;Chr4			hypo	#N/A
Chr5	15813584	15813584	-	2.89276e-06	0.00604753	-27.1214	NONE				hypo	#N/A
Chr4	4363642	4363642	-	4.50388e-06	0.00809238	-27.1205	AT4G07528	transposable_element_gene,mRNA,exon;Chr4			hypo	#N/A
Chr3	7764993	7764993	+	4.34474e-09	5.09897e-05	-27.1134	AT3G22050	gene,mRNA,protein,exon,CDS;			hypo	#N/A
Chr2	4221411	4221411	-	2.62071e-06	0.00570181	-27.0833	NONE				hypo	#N/A
Chr3	10917767	10917767	+	1.00624e-06	0.00301614	-27.0743	AT3G28915	transposable_element_gene,mRNA,exon;Chr3			hypo	#N/A
Chr3	11054039	11054039	-	3.16212e-09	3.89661e-05	-27.0562	Chr3	transposable_element,transposon_fragment;			hypo	#N/A
Chr4	4973667	4973667	+	5.55112e-15	2.53875e-10	-27.0553	AT4G08090	transposable_element_gene,mRNA,exon;Chr4			hypo	#N/A
Chr4	3350225	3350225	-	9.17881e-08	0.000548099	-27.055	AT4G06532	transposable_element_gene,mRNA,exon;Chr4			hypo	#N/A
Chr5	1230314	1230314	+	1.38387e-08	0.000129245	-27.0231	NONE				hypo	#N/A
Chr5	19965650	19965650	-	6.09039e-06	0.00980697	-27.0206	AT5G49250	gene,mRNA,protein,exon,CDS;			hypo	#N/A
Chr4	410696	410696	+	1.71177e-07	0.00088196	-27.0163	NONE				hypo	#N/A
Chr3	10806359	10806359	-	1.18733e-10	2.37263e-06	-27.0132	AT3G28780	gene,mRNA,protein,CDS,exon;			hypo	#N/A
Chr2	6030066	6030066	+	3.91271e-06	0.00738619	-27.0081	AT2G14240	transposable_element_gene,mRNA,exon;Chr2	similar to unknown protein [Arabidopsis thaliana] (TAIR:AT2G13320.1)		hypo	#N/A
Chr5	14083999	14083999	+	3.02326e-09	3.76735e-05	-26.9978	AT5G35935	transposable_element_gene,mRNA,exon;Chr5			hypo	#N/A
Chr2	4488736	4488736	-	2.38317e-06	0.00535856	-26.9689	NONE				hypo	#N/A
Chr4	7558808	7558808	+	2.94438e-06	0.00611511	-26.9643	AT4G12915	transposable_element_gene,mRNA,exon;Chr4			hypo	#N/A
Chr5	22165310	22165310	-	4.86197e-06	0.00849494	-26.9587	NONE				hypo	#N/A
Chr5	13137437	13137437	-	5.5104e-06	0.00923158	-26.9365	Chr5	transposable_element,transposon_fragment;			hypo	#N/A
Chr5	10942645	10942645	-	3.46133e-06	0.00683363	-26.9357	AT5G28920	gene,mRNA,protein;			hypo	#N/A
Chr3	11682488	11682488	+	2.34942e-06	0.00531033	-26.9306	AT3G29783	transposable_element_gene,mRNA,exon;Chr3			hypo	#N/A
Chr2	2952574	2952574	-	1.42762e-06	0.00381518	-26.911	NONE				hypo	#N/A
Chr2	3962591	3962591	-	5.13847e-06	0.00882512	-26.9105	Chr2	transposable_element,transposon_fragment;			hypo	#N/A
Chr3	11852495	11852495	+	9.33545e-07	0.00287997	-26.9017	Chr3	transposable_element,transposon_fragment;			hypo	#N/A
Chr1	13043466	13043466	+	1.74408e-08	0.000154126	-26.8808	NONE				hypo	#N/A
Chr2	2195801	2195801	-	6.25584e-06	0.00994344	-26.8756	AT2G05780	transposable_element_gene,mRNA,exon;Chr2	non-LTR retrotransposon family (LINE), has a 2.5e-37 P-value blast match to GB:NP_038603 L1 repeat, Tf subfamily, member 23 (LINE-element) (Mus musculus)		hypo	#N/A
Chr5	12192367	12192367	+	6.96905e-07	0.00236362	-26.8707	AT5G32520	transposable_element_gene,mRNA,exon;Chr5			hypo	#N/A
Chr5	10724450	10724450	-	1.95444e-06	0.00472734	-26.8657	NONE				hypo	#N/A
Chr2	4500669	4500669	+	7.22143e-09	7.73809e-05	-26.8532	Chr2	transposable_element,transposon_fragment;			hypo	#N/A
Chr3	12978016	12978016	-	1.13858e-06	0.00328199	-26.8219	NONE				hypo	#N/A
Chr1	12223164	12223164	-	9.71902e-07	0.00295279	-26.8112	AT1G33720	gene,mRNA,protein;	cytochrome P450, family 76, subfamily C, polypeptide 6		hypo	#N/A
Chr3	12326158	12326158	-	2.65834e-07	0.00120459	-26.8057	AT3G30716	transposable_element_gene,mRNA,exon;Chr3			hypo	#N/A
Chr1	13174989	13174989	-	9.28237e-08	0.000552731	-26.801	AT1G35640	transposable_element_gene,mRNA;Chr1	transposable_element_gene		hypo	#N/A
Chr4	3656208	3656208	-	1.39667e-06	0.0037546	-26.7978	Chr4	transposable_element,transposon_fragment;			hypo	#N/A
Chr2	3979503	3979503	+	3.8154e-06	0.00727682	-26.7961	AT2G10330	transposable_element_gene,mRNA,exon;Chr2	gypsy-like retrotransposon family, has a 5.7e-176 P-value blast match to GB:AAD19359 polyprotein (gypsy_Ty3-element) (Sorghum bicolor)		hypo	#N/A
Chr4	5027327	5027327	-	3.21999e-06	0.00650775	-26.7769	Chr4	transposable_element,transposon_fragment;			hypo	#N/A
Chr4	3566364	3566364	-	3.56122e-07	0.0014601	-26.7606	AT4G06580	transposable_element_gene,mRNA,exon;			hypo	#N/A
Chr2	4789337	4789337	-	1.22908e-06	0.0034292	-26.7485	AT2G11851	gene,mRNA,exon,five_prime_UTR;	unknown protein		hypo	#N/A
Chr2	6253020	6253020	+	3.82543e-07	0.00152608	-26.7436	AT2G14630	transposable_element_gene,mRNA;Chr2	similar to unknown protein [Arabidopsis thaliana] (TAIR:AT5G28785.1)		hypo	#N/A
Chr4	3165050	3165050	+	6.49122e-08	0.000424099	-26.7344	AT4G06500	transposable_element_gene,mRNA,exon;Chr4			hypo	#N/A
Chr2	41308	41308	-	8.72983e-07	0.00274661	-26.7258	Chr2	transposable_element,transposon_fragment;			hypo	#N/A
Chr5	11369634	11369634	+	4.40195e-06	0.00795875	-26.7157	AT5G30406	transposable_element_gene,mRNA,exon;Chr5			hypo	#N/A
Chr1	24482342	24482342	-	3.40132e-08	0.000258372	-26.6615	NONE				hypo	#N/A
Chr5	12978781	12978781	-	4.78431e-08	0.000332885	-26.6397	Chr5	transposable_element,transposon_fragment;			hypo	#N/A
Chr3	18530802	18530802	-	5.62759e-07	0.00205353	-26.634	AT3G49980	gene,mRNA,protein,CDS,exon;			hypo	#N/A
Chr5	11603644	11603644	-	4.79962e-06	0.0084225	-26.6318	AT5G30269	transposable_element_gene,mRNA,exon;Chr5			hypo	#N/A
Chr2	5728428	5728428	+	9.21059e-07	0.00285734	-26.631	AT2G13740	transposable_element_gene,mRNA,exon;Chr2	pseudogene, hypothetical protein		hypo	#N/A
Chr2	1637034	1637034	+	2.65772e-08	0.00021359	-26.6221	Chr2	transposable_element,transposon_fragment;			hypo	#N/A
Chr3	4455857	4455857	+	3.90178e-06	0.00737724	-26.5996	AT3G13624	pseudogene,pseudogenic_transcript,pseudogenic_exon;			hypo	#N/A
Chr2	3064470	3064470	-	3.62778e-10	6.05021e-06	-26.5969	AT2G07380	transposable_element_gene,mRNA,exon;Chr2	Mutator-like transposase family, has a 5.0e-62 P-value blast match to O22273 /233-373 Pfam PF03108 MuDR family transposase (MuDr-element domain)		hypo	#N/A
ChrM	198876	198876	+	2.54262e-06	0.00558395	-26.595					hypo	#N/A
Chr5	11372744	11372744	+	5.98597e-06	0.00971686	-26.5734	Chr5	transposable_element,transposon_fragment;			hypo	#N/A
Chr4	4273138	4273138	+	2.23033e-08	0.000188575	-26.5711	AT4G07490	transposable_element_gene,mRNA,exon;Chr4			hypo	#N/A
Chr1	15885320	15885320	-	8.95763e-07	0.00280239	-26.567	NONE				hypo	#N/A
Chr1	10152729	10152729	-	2.72359e-06	0.00582564	-26.555	NONE				hypo	#N/A
Chr5	15601302	15601302	-	8.93322e-09	9.13123e-05	-26.5529	Chr5	transposable_element,transposon_fragment;			hypo	#N/A
Chr5	8586029	8586029	+	6.26232e-06	0.00995017	-26.5493	NONE				hypo	#N/A
Chr4	2065042	2065042	-	1.7149e-06	0.00431517	-26.5288	AT4G04280	transposable_element_gene,mRNA,exon;Chr4			hypo	#N/A
Chr3	11929452	11929452	+	6.09815e-06	0.00980985	-26.5263	Chr3	transposable_element,transposon_fragment;			hypo	#N/A
Chr5	12136626	12136626	+	4.4597e-07	0.00170113	-26.4943	AT5G32505	transposable_element_gene,mRNA,exon;Chr5			hypo	#N/A
Chr2	2768552	2768552	+	9.64422e-08	0.000569017	-26.4721	AT2G06860	transposable_element_gene,mRNA,exon;Chr2	similar to Ulp1 protease family protein [Arabidopsis thaliana] (TAIR:AT1G35770.1)		hypo	#N/A
Chr5	12179940	12179940	-	5.65169e-06	0.00935873	-26.4463	AT5G32518	transposable_element_gene,mRNA,exon;Chr5			hypo	#N/A
Chr3	3542941	3542941	-	7.02469e-07	0.00237522	-26.4345	AT3G11310	gene,mRNA,protein,CDS,exon;			hypo	#N/A
Chr2	5024067	5024067	-	9.77372e-10	1.41693e-05	-26.4331	AT2G12410	transposable_element_gene,mRNA,exon;Chr2	copia-like retrotransposon family, has a 5.0e-99 P-value blast match to gb|AAG52949.1| gag/pol polyprotein (Endovir1-1) (Arabidopsis thaliana) (Ty1_Copia-family)		hypo	#N/A
Chr3	17394917	17394917	-	1.9242e-07	0.000954826	-26.4236	AT3G47240	transposable_element_gene,mRNA;Chr3			hypo	#N/A
Chr5	13328968	13328968	+	1.93082e-06	0.00469865	-26.3984	AT5G35065	transposable_element_gene,mRNA,exon;Chr5			hypo	#N/A
Chr3	16520916	16520916	+	3.74796e-06	0.00718836	-26.3654	Chr3	transposable_element,transposon_fragment;			hypo	#N/A
Chr5	1560004	1560004	-	6.45165e-09	7.04945e-05	-26.3501	AT5G05260	gene,mRNA,protein,CDS,exon;			hypo	#N/A
Chr5	15203848	15203848	+	1.26308e-06	0.00350205	-26.3229	AT5G38096	pseudogene,pseudogenic_transcript;			hypo	#N/A
Chr1	22046713	22046713	-	1.95543e-06	0.00472734	-26.3158	AT1G59890	gene,mRNA,protein,exon,CDS;	SIN3-like 5		hypo	#N/A
Chr5	18258958	18258958	+	8.99948e-07	0.00280953	-26.3122	Chr5	transposable_element,transposon_fragment;			hypo	#N/A
Chr1	13613146	13613146	-	2.0363e-06	0.00484924	-26.3018	AT1G36230	gene,mRNA,protein,CDS,exon;	unknown protein		hypo	#N/A
Chr2	4226811	4226811	-	9.26623e-07	0.00286829	-26.2981	Chr2	transposable_element;			hypo	#N/A
Chr3	3542918	3542918	+	1.58126e-06	0.00409742	-26.2958	AT3G11310	gene,mRNA,protein,CDS,exon;			hypo	#N/A
Chr2	5301353	5301353	-	2.00494e-06	0.00481058	-26.2857	Chr2	transposable_element,transposon_fragment;			hypo	#N/A
Chr3	10806332	10806332	-	3.07886e-09	3.8152e-05	-26.2839	AT3G28780	gene,mRNA,protein,CDS,exon;			hypo	#N/A
Chr4	1938440	1938440	-	5.63368e-06	0.00933805	-26.2835	Chr4	transposable_element,transposon_fragment;			hypo	#N/A
Chr3	12923058	12923058	+	3.10653e-06	0.0063537	-26.2829	AT3G31920	transposable_element_gene,mRNA,exon;Chr3			hypo	#N/A
Chr4	3323961	3323961	+	2.94057e-07	0.00128649	-26.2761	AT4G06527	transposable_element_gene,mRNA,exon;Chr4			hypo	#N/A
Chr3	15459041	15459041	-	3.83641e-10	6.30336e-06	-26.2681	AT3G43563	transposable_element_gene,mRNA,exon;Chr3			hypo	#N/A
Chr1	15209356	15209356	-	1.92253e-06	0.00469127	-26.2481	Chr1	transposable_element,transposon_fragment;			hypo	#N/A
Chr1	23173556	23173556	+	1.60175e-06	0.00412882	-26.2439	AT1G62580	gene,mRNA,protein,exon,CDS;	Flavin-binding monooxygenase family protein		hypo	#N/A
Chr4	5084280	5084280	+	2.28052e-06	0.00523918	-26.2069	AT4G08110	transposable_element_gene,mRNA,exon;Chr4			hypo	#N/A
Chr3	13368264	13368264	+	6.15179e-06	0.00985574	-26.2	NONE				hypo	#N/A
Chr1	10545359	10545359	-	4.35239e-06	0.00791315	-26.1908	AT1G30060	gene,mRNA,protein;	COP1-interacting protein-related		hypo	#N/A
Chr5	12356257	12356257	+	5.4731e-06	0.00918992	-26.1905	AT5G32690	pseudogene,pseudogenic_transcript;AT5G32825	transposable_element,transposon_fragment;		hypo	#N/A
Chr3	20206400	20206400	-	6.30589e-08	0.000414432	-26.1529	AT3G54590	gene,mRNA,protein,exon,CDS;			hypo	#N/A
Chr1	19678073	19678073	+	5.15339e-06	0.00883705	-26.1423	AT1G52850	transposable_element_gene,mRNA,exon;Chr1	CACTA-like transposase family (Ptta/En/Spm), has a 4.2e-106 P-value blast match to At5g36655.1/81-333 CACTA-like transposase family (Ptta/En/Spm) (CACTA-element) (Arabidopsis thaliana)		hypo	#N/A
Chr4	5297966	5297966	+	2.06971e-06	0.00490471	-26.1349	NONE				hypo	#N/A
Chr1	18806921	18806921	-	1.19867e-11	3.14648e-07	-26.1286	AT1G50735	transposable_element_gene,mRNA,exon;Chr1	Member of Sadhu non-coding retrotransposon family		hypo	#N/A
Chr2	1973811	1973811	+	3.33162e-07	0.0013927	-26.1267	AT2G05390	transposable_element_gene,mRNA,exon;Chr2	copia-like retrotransposon family, has a 7.2e-200 P-value blast match to gb|AAG52949.1| gag/pol polyprotein (Endovir1-1) (Arabidopsis thaliana) (Ty1_Copia-family)		hypo	#N/A
Chr4	249215	249215	+	2.39988e-07	0.00111015	-26.1222	AT4G00580	gene,mRNA,protein,exon,CDS;			hypo	#N/A
Chr3	15158330	15158330	-	1.55444e-08	0.000140444	-26.1219	AT3G43157	transposable_element_gene,mRNA,exon;Chr3			hypo	#N/A
Chr1	17520916	17520916	-	5.98327e-07	0.00212684	-26.1192	AT1G47650	transposable_element_gene,mRNA,exon;Chr1	copia-like retrotransposon family, has a 0. P-value blast match to GB:CAA72989 open reading frame 1 (Ty1_Copia-element) (Brassica oleracea)		hypo	#N/A
Chr2	1667377	1667377	+	3.38511e-06	0.00672805	-26.101	AT2G04760	transposable_element_gene,mRNA,exon;Chr2	non-LTR retrotransposon family (LINE), has a 1.8e-38 P-value blast match to GB:NP_038605 L1 repeat, Tf subfamily, member 30 (LINE-element) (Mus musculus)		hypo	#N/A
Chr3	15306143	15306143	-	1.33333e-07	0.000723981	-26.1002	AT3G43356	transposable_element_gene,mRNA,exon;Chr3			hypo	#N/A
Chr3	15859764	15859764	-	2.98166e-06	0.00616079	-26.0934	AT3G44096	transposable_element_gene,mRNA,exon;Chr3			hypo	#N/A
Chr1	10401885	10401885	-	3.39069e-06	0.00673612	-26.087	AT1G29730	gene,mRNA,protein,CDS,exon;	Leucine-rich repeat transmembrane protein kinase		hypo	#N/A
Chr5	13933328	13933328	-	1.19235e-06	0.00336911	-26.0844	NONE				hypo	#N/A
Chr4	4276534	4276534	-	7.67009e-07	0.0025117	-26.0738	AT4G07491	transposable_element_gene,mRNA,exon;Chr4			hypo	#N/A
Chr5	16015842	16015842	+	2.22287e-06	0.00514671	-26.068	NONE				hypo	#N/A
Chr3	11584906	11584906	+	1.63875e-09	2.22318e-05	-26.0548	AT3G29755	transposable_element_gene,mRNA,exon;Chr3			hypo	#N/A
Chr3	8615485	8615485	-	3.31001e-07	0.00138527	-26.051	NONE				hypo	#N/A
Chr3	11975775	11975775	-	2.54379e-09	3.26148e-05	-26.0404	AT3G30380	gene,mRNA,protein,exon,CDS;			hypo	#N/A
Chr5	13542055	13542055	-	2.88555e-07	0.00126741	-26.0318	Chr5	transposable_element,transposon_fragment;			hypo	#N/A
Chr3	16468273	16468273	+	9.78102e-07	0.00296383	-26.0274	AT3G45010	gene,mRNA,protein,exon,CDS;			hypo	#N/A
Chr4	4632237	4632237	-	1.92822e-06	0.00469865	-26.0118	AT4G07810	transposable_element_gene,mRNA,exon;Chr4			hypo	#N/A
Chr1	16148334	16148334	+	2.21258e-07	0.00104198	-25.9991	Chr1	transposable_element,transposon_fragment;			hypo	#N/A
Chr3	5983270	5983270	-	6.50274e-08	0.000424227	-25.9974	AT3G17480	gene,mRNA,protein,exon,CDS;			hypo	#N/A
Chr2	4792193	4792193	-	4.53675e-06	0.00813498	-25.9914	NONE				hypo	#N/A
Chr2	6159593	6159593	+	2.68767e-06	0.00577667	-25.9857	AT2G14470	transposable_element_gene,mRNA,exon;Chr2	pseudogene, similar to putative helicase, low similarity to SP|Q9UUA2 DNA repair and recombination protein pif1, mitochondrial precursor {Schizosaccharomyces pombe}		hypo	#N/A
Chr5	12293286	12293286	-	4.01185e-07	0.00157692	-25.978	AT5G32624	transposable_element_gene,mRNA,exon;Chr5			hypo	#N/A
Chr4	5664555	5664555	-	2.57703e-11	6.08096e-07	-25.9748	Chr4	transposable_element,transposon_fragment;			hypo	#N/A
Chr5	10362930	10362930	+	5.17311e-10	8.28107e-06	-25.9725	AT5G28415	transposable_element_gene,mRNA,exon;Chr5			hypo	#N/A
Chr3	12040250	12040250	+	5.34517e-06	0.00904356	-25.9721	AT3G30415	pseudogene,pseudogenic_transcript,pseudogenic_exon;			hypo	#N/A
Chr2	4517983	4517983	-	4.15795e-06	0.00767922	-25.9527	AT2G11340	transposable_element_gene,mRNA,exon;Chr2	gypsy-like retrotransposon family (Athila), has a 4.5e-221 P-value blast match to GB:CAA57397 Athila ORF 1 (Arabidopsis thaliana)		hypo	#N/A
Chr1	14056884	14056884	-	8.74217e-07	0.00274855	-25.9504	AT1G37035	transposable_element_gene,mRNA,exon;Chr1	Mutator-like transposase family, has a 5.6e-50 P-value blast match to Q9S9L1 /206-367 Pfam PF03108 MuDR family transposase (MuDr-element domain)		hypo	#N/A
Chr5	11195985	11195985	-	4.84985e-08	0.000335123	-25.9395	Chr5	transposable_element,transposon_fragment;			hypo	#N/A
Chr5	21373791	21373791	+	4.45318e-07	0.0017001	-25.937	AT5G52700	gene,mRNA,protein,exon,CDS;			hypo	#N/A
Chr5	15498371	15498371	-	5.47967e-06	0.00919398	-25.9355	Chr5	transposable_element,transposon_fragment;			hypo	#N/A
Chr5	7462518	7462518	-	5.49841e-06	0.00921498	-25.9259	NONE				hypo	#N/A
Chr5	10745837	10745837	+	1.20235e-06	0.00338252	-25.8981	Chr5	transposable_element,transposon_fragment;			hypo	#N/A
Chr3	22767512	22767512	-	3.46279e-13	1.19082e-08	-25.8796	Chr3	transposable_element,transposon_fragment;			hypo	#N/A
Chr3	22767559	22767559	-	1.53144e-10	2.92835e-06	-25.8795	Chr3	transposable_element,transposon_fragment;			hypo	#N/A
Chr5	10257351	10257351	+	1.59129e-06	0.004109	-25.859	AT5G28266	transposable_element_gene,mRNA,exon;Chr5			hypo	#N/A
Chr2	6961909	6961909	-	2.80089e-06	0.00592982	-25.8547	Chr2	transposable_element,transposon_fragment;			hypo	#N/A
Chr3	10636208	10636208	-	8.72882e-07	0.00274661	-25.8459	AT3G28400	transposable_element_gene,mRNA,exon;Chr3			hypo	#N/A
Chr4	1652327	1652327	+	3.9482e-06	0.00742476	-25.8404	AT4G03728	gene,mRNA,protein,CDS,exon;			hypo	#N/A
Chr2	3038298	3038298	-	1.42443e-07	0.000766876	-25.8371	AT2G07320	transposable_element_gene,mRNA;	similar to unknown protein [Arabidopsis thaliana] (TAIR:AT5G37880.1)		hypo	#N/A
Chr1	13014226	13014226	+	1.06766e-07	0.000614311	-25.8297	AT1G35390	transposable_element_gene,mRNA,exon;	non-LTR retrotransposon family (LINE), has a 2.6e-43 P-value blast match to GB:AAA67727 reverse transcriptase (LINE-element) (Mus musculus)		hypo	#N/A
Chr3	22767295	22767295	-	4.33415e-08	0.000306653	-25.8229	Chr3	transposable_element,transposon_fragment;			hypo	#N/A
Chr5	17890264	17890264	-	1.15519e-06	0.00331051	-25.8156	Chr5	transposable_element,transposon_fragment;			hypo	#N/A
Chr2	1403238	1403238	+	6.02752e-06	0.00975529	-25.8015	AT2G04160	gene,mRNA,protein,CDS,exon;	Subtilisin-like serine endopeptidase family protein		hypo	#N/A
Chr1	25751296	25751296	+	1.94417e-06	0.00471333	-25.7982	NONE				hypo	#N/A
Chr5	13064276	13064276	+	1.22868e-06	0.0034292	-25.78	NONE				hypo	#N/A
Chr5	13518352	13518352	-	4.95963e-08	0.000338797	-25.779	AT5G35300	gene,mRNA,protein,exon,CDS;			hypo	#N/A
Chr1	11318756	11318756	+	4.72864e-07	0.00178226	-25.767	AT1G31630	gene,mRNA,protein,CDS,exon;	AGAMOUS-like 86		hypo	#N/A
Chr2	3044861	3044861	-	3.33265e-06	0.00665726	-25.737	Chr2	transposable_element,transposon_fragment;			hypo	#N/A
Chr5	19965234	19965234	-	1.95295e-06	0.00472676	-25.7354	NONE				hypo	#N/A
Chr5	9891173	9891173	-	7.57016e-07	0.00249686	-25.7322	Chr5	transposable_element,transposon_fragment;			hypo	#N/A
Chr2	2502893	2502893	-	4.7011e-06	0.00830877	-25.723	AT2G06340	transposable_element_gene,mRNA,exon;Chr2	pseudogene, hypothetical protein		hypo	#N/A
Chr5	12147138	12147138	-	9.74417e-08	0.000572544	-25.7215	AT5G32512	transposable_element_gene,mRNA,exon;Chr5			hypo	#N/A
Chr5	22165182	22165182	-	3.83625e-10	6.30336e-06	-25.7042	NONE				hypo	#N/A
Chr1	13407387	13407387	-	4.65324e-07	0.00176132	-25.693	NONE				hypo	#N/A
Chr3	10806779	10806779	-	7.04822e-08	0.000452493	-25.6834	AT3G28780	gene,mRNA,protein,CDS,exon;			hypo	#N/A
Chr4	4757591	4757591	-	3.30209e-06	0.0066164	-25.6618	AT4G07936	transposable_element_gene,mRNA,exon;Chr4			hypo	#N/A
Chr2	2865673	2865673	+	9.88273e-07	0.0029804	-25.6617	NONE				hypo	#N/A
Chr5	15579060	15579060	-	4.95724e-06	0.0086038	-25.6576	AT5G38910	gene,mRNA,protein,exon,CDS;			hypo	#N/A
Chr3	22767669	22767669	-	9.31121e-07	0.00287449	-25.6342	Chr3	transposable_element,transposon_fragment;			hypo	#N/A
Chr1	10545297	10545297	-	4.26253e-06	0.0078243	-25.6339	AT1G30060	gene,mRNA,protein;	COP1-interacting protein-related		hypo	#N/A
Chr4	3921112	3921112	-	2.51728e-06	0.00554477	-25.6078	AT4G06688	gene,mRNA,protein;			hypo	#N/A
Chr3	7749246	7749246	-	2.12589e-07	0.0010119	-25.5952	NONE				hypo	#N/A
Chr5	12225396	12225396	-	5.93455e-07	0.00211744	-25.5885	AT5G32591	transposable_element_gene,mRNA,exon;Chr5			hypo	#N/A
Chr4	5510734	5510734	-	3.49457e-06	0.00688393	-25.5849	AT4G08630	gene,mRNA,protein,CDS,exon;			hypo	#N/A
Chr5	11035659	11035659	+	1.1139e-06	0.0032382	-25.5786	AT5G29015	transposable_element_gene,mRNA,exon;Chr5			hypo	#N/A
Chr2	4987704	4987704	+	2.39746e-10	4.25424e-06	-25.5648	AT2G12380	transposable_element_gene,mRNA,exon;Chr2	pseudogene, myosin-related protein, similar to GB:AAC28203		hypo	#N/A
Chr3	14514445	14514445	+	6.28597e-06	0.00997346	-25.5633	AT3G42386	transposable_element_gene,mRNA,exon;Chr3			hypo	#N/A
Chr2	5024037	5024037	-	9.90097e-09	9.87026e-05	-25.5617	AT2G12410	transposable_element_gene,mRNA,exon;Chr2	copia-like retrotransposon family, has a 5.0e-99 P-value blast match to gb|AAG52949.1| gag/pol polyprotein (Endovir1-1) (Arabidopsis thaliana) (Ty1_Copia-family)		hypo	#N/A
Chr1	17714003	17714003	-	9.78101e-07	0.00296383	-25.5499	Chr1	transposable_element,transposon_fragment;			hypo	#N/A
Chr3	10806748	10806748	-	5.2291e-08	0.000354699	-25.5478	AT3G28780	gene,mRNA,protein,CDS,exon;			hypo	#N/A
Chr4	4178605	4178605	-	4.47449e-07	0.00170425	-25.5354	AT4G07355	transposable_element_gene,mRNA,exon;Chr4			hypo	#N/A
Chr3	12804504	12804504	-	2.90867e-12	8.53804e-08	-25.5303	AT3G31440	transposable_element_gene,mRNA,exon;AT3G31442	transposable_element,transposon_fragment;		hypo	#N/A
Chr4	5755300	5755300	-	2.23169e-08	0.000188575	-25.5301	AT4G08970	transposable_element_gene,mRNA,exon;			hypo	#N/A
Chr4	5664549	5664549	-	4.12041e-08	0.000296255	-25.5292	Chr4	transposable_element,transposon_fragment;			hypo	#N/A
Chr3	7041321	7041321	+	6.68087e-07	0.00229928	-25.526	Chr3	transposable_element,transposon_fragment;			hypo	#N/A
Chr4	10052254	10052254	-	1.50409e-06	0.00395757	-25.5207	AT4G18150	gene,mRNA,protein,exon,CDS;			hypo	#N/A
Chr5	13124411	13124411	+	1.67658e-06	0.00425009	-25.5104	AT5G34856	transposable_element_gene,mRNA,exon;Chr5			hypo	#N/A
Chr3	3542894	3542894	+	1.09899e-06	0.00320957	-25.5026	AT3G11310	gene,mRNA,protein,CDS,exon;			hypo	#N/A
Chr2	4492568	4492568	-	1.28109e-06	0.00354304	-25.488	AT2G11300	transposable_element_gene,mRNA,exon;Chr2	pseudogene, hypothetical protein, similar to GB:AAD38224		hypo	#N/A
Chr1	23173377	23173377	-	2.34152e-08	0.000194521	-25.4714	AT1G62580	gene,mRNA,protein,exon,CDS;	Flavin-binding monooxygenase family protein		hypo	#N/A
Chr1	7071081	7071081	+	2.75476e-06	0.00586967	-25.467	AT1G20390	transposable_element_gene,mRNA,exon;Chr1	gypsy-like retrotransposon family, has a 1.5e-251 P-value blast match to GB:AAD19359 polyprotein (gypsy_Ty3-element) (Sorghum bicolor)		hypo	#N/A
Chr5	9282064	9282064	-	3.96476e-06	0.00743492	-25.4407	NONE				hypo	#N/A
Chr3	14922085	14922085	+	3.51129e-06	0.0069138	-25.4263	AT3G42820	transposable_element_gene,mRNA;Chr3			hypo	#N/A
Chr2	5811686	5811686	-	6.05371e-06	0.00979051	-25.4219	AT2G13860	transposable_element_gene,mRNA,exon;Chr2	gypsy-like retrotransposon family, has a 2.4e-275 P-value blast match to GB:AAD27547 polyprotein (Gypsy_Ty3-element) (Oryza sativa subsp. indica)		hypo	#N/A
Chr2	3007329	3007329	+	3.27423e-08	0.000251735	-25.3891	AT2G07240	gene,mRNA,protein,CDS,exon;Chr2	cysteine-type peptidases		hypo	#N/A
Chr3	18831172	18831172	+	2.49097e-06	0.00551144	-25.3856	AT3G50674	gene,mRNA,protein,exon,CDS;			hypo	#N/A
Chr4	4532087	4532087	-	2.06925e-07	0.000999956	-25.3817	Chr4	transposable_element,transposon_fragment;			hypo	#N/A
Chr4	4392969	4392969	+	9.82406e-08	0.000576475	-25.3807	Chr4	transposable_element,transposon_fragment;			hypo	#N/A
Chr5	9413767	9413767	-	3.83717e-06	0.00730476	-25.3782	AT5G26775	transposable_element_gene,mRNA,exon;Chr5			hypo	#N/A
Chr5	11556129	11556129	+	7.87714e-07	0.0025507	-25.3761	AT5G31511	transposable_element_gene,mRNA,exon;Chr5			hypo	#N/A
Chr5	20394316	20394316	+	3.33404e-07	0.0013927	-25.3731	NONE				hypo	#N/A
Chr3	16563799	16563799	+	4.32341e-06	0.00787013	-25.3664	NONE				hypo	#N/A
Chr4	3382942	3382942	-	2.6774e-06	0.00576577	-25.3556	AT4G06543	transposable_element_gene,mRNA,exon;Chr4			hypo	#N/A
Chr1	23173558	23173558	-	4.40978e-07	0.00169056	-25.3535	AT1G62580	gene,mRNA,protein,exon,CDS;	Flavin-binding monooxygenase family protein		hypo	#N/A
Chr5	11049081	11049081	+	2.07538e-06	0.00490908	-25.3523	AT5G29022	transposable_element_gene,mRNA,exon;Chr5			hypo	#N/A
Chr3	10561664	10561664	+	2.47124e-07	0.00113723	-25.3469	AT3G28295	transposable_element_gene,mRNA,exon;Chr3			hypo	#N/A
Chr5	12023653	12023653	+	1.40791e-06	0.00377535	-25.3452	AT5G32410	transposable_element_gene,mRNA,exon;Chr5			hypo	#N/A
Chr5	12199528	12199528	-	3.10963e-08	0.000241659	-25.3233	AT5G32540	transposable_element_gene,mRNA,exon;			hypo	#N/A
Chr3	11855737	11855737	-	1.77655e-08	0.000156682	-25.3232	AT3G30213	transposable_element_gene,mRNA,exon;Chr3			hypo	#N/A
Chr4	3109547	3109547	+	1.51403e-06	0.00397193	-25.2874	AT4G06488	transposable_element_gene,mRNA,exon;Chr4			hypo	#N/A
Chr1	15448779	15448779	+	1.17031e-06	0.00333444	-25.2676	AT1G40630	transposable_element_gene,mRNA,exon;Chr1	gypsy-like retrotransposon family (Athila), has a 8.7e-230 P-value blast match to GB:CAA57397 Athila ORF 1 (Arabidopsis thaliana)		hypo	#N/A
Chr3	14698050	14698050	+	3.89554e-06	0.00737724	-25.2637	AT3G42600	transposable_element_gene,mRNA,exon;Chr3			hypo	#N/A
Chr2	4051997	4051997	-	2.53529e-06	0.00557336	-25.2494	AT2G10510	transposable_element_gene,mRNA,exon;Chr2	copia-like retrotransposon family, has a 2.5e-94 P-value blast match to gb|AAG52949.1| gag/pol polyprotein (Endovir1-1) (Arabidopsis thaliana) (Ty1_Copia-family)		hypo	#N/A
Chr4	6689391	6689391	+	5.56659e-06	0.00927582	-25.2414	AT4G10890	gene,mRNA,protein,exon,CDS;Chr4			hypo	#N/A
Chr2	11123668	11123668	+	2.74423e-08	0.000218956	-25.2409	AT2G26120	gene,mRNA,protein,exon,CDS;			hypo	#N/A
Chr5	10585393	10585393	-	1.7609e-06	0.00439757	-25.2384	AT5G28593	transposable_element_gene,mRNA,exon;Chr5			hypo	#N/A
Chr3	13365675	13365675	+	5.59538e-06	0.00931066	-25.2141	AT3G32405	transposable_element_gene,mRNA,exon;Chr3			hypo	#N/A
Chr5	12456022	12456022	-	6.70134e-08	0.000433992	-25.2116	AT5G33202	transposable_element_gene,mRNA,exon;Chr5			hypo	#N/A
Chr1	17714142	17714142	+	7.59668e-07	0.00250325	-25.2113	Chr1	transposable_element,transposon_fragment;			hypo	#N/A
Chr1	15682181	15682181	-	4.26709e-06	0.0078243	-25.2049	AT1G41920	gene,mRNA,protein;Chr1	General transcription factor 2-related zinc finger protein		hypo	#N/A
Chr3	15813687	15813687	-	4.29094e-09	5.0492e-05	-25.1967	AT3G44042	transposable_element_gene,mRNA,exon;Chr3			hypo	#N/A
Chr5	13312657	13312657	+	1.17119e-06	0.00333481	-25.1797	NONE				hypo	#N/A
Chr5	11684185	11684185	-	1.84162e-06	0.00454887	-25.179	NONE				hypo	#N/A
Chr4	3756256	3756256	+	2.00049e-07	0.000975228	-25.1439	AT4G06630	transposable_element_gene,mRNA,exon;Chr4			hypo	#N/A
Chr5	14715839	14715839	+	2.44454e-06	0.00544948	-25.1123	AT5G37175	transposable_element_gene,mRNA,exon;Chr5			hypo	#N/A
Chr1	15052079	15052079	+	2.49379e-06	0.00551494	-25.1066	Chr1	transposable_element,transposon_fragment;			hypo	#N/A
Chr3	22767614	22767614	-	1.51047e-08	0.000137876	-25.1005	Chr3	transposable_element,transposon_fragment;			hypo	#N/A
Chr2	1403317	1403317	-	5.44795e-06	0.00915536	-25.0916	AT2G04160	gene,mRNA,protein,CDS,exon;	Subtilisin-like serine endopeptidase family protein		hypo	#N/A
Chr3	16245909	16245909	+	3.83652e-07	0.00152779	-25.0903	AT3G44705	transposable_element_gene,mRNA,exon;			hypo	#N/A
Chr1	8643725	8643725	-	1.60488e-06	0.00413449	-25.0892	NONE				hypo	#N/A
Chr4	3351346	3351346	+	4.72367e-06	0.00833537	-25.085	AT4G06532	transposable_element_gene,mRNA,exon;Chr4			hypo	#N/A
Chr2	5326094	5326094	-	1.26558e-06	0.0035046	-25.0726	AT2G12950	transposable_element_gene,mRNA,exon;Chr2	CACTA-like transposase family (En/Spm), has a 2.9e-105 P-value blast match to GB:AAD55677 putative transposase protein (CACTA-element) transposon=Shooter (Zea mays)		hypo	#N/A
Chr3	15582823	15582823	-	1.04588e-06	0.00309934	-25.0722	AT3G43681	transposable_element_gene,mRNA,exon;Chr3			hypo	#N/A
Chr4	3647430	3647430	+	1.08457e-07	0.00061843	-25.0664	AT4G06596	transposable_element_gene,mRNA,exon;Chr4			hypo	#N/A
Chr3	11854815	11854815	+	2.20558e-08	0.000187082	-25.0615	AT3G30213	transposable_element_gene,mRNA,exon;Chr3			hypo	#N/A
Chr5	11122540	11122540	-	9.46814e-07	0.00290924	-25.0564	AT5G29058	transposable_element_gene,mRNA,exon;Chr5			hypo	#N/A
Chr4	3360985	3360985	+	7.92142e-07	0.00255943	-25.0532	AT4G06536	gene,mRNA,protein,exon,CDS;			hypo	#N/A
Chr1	29263762	29263762	+	1.63285e-08	0.000145745	25.304	AT1G77820	transposable_element_gene,mRNA,exon;	pseudogene, endonuclease/exonuclease/phosphatase family protein, contains similarity to reverse transcriptase GI:976278 from (Arabidopsis thaliana)		hyper	#N/A
Chr3	8660037	8660037	+	3.13289e-07	0.00133893	25.4222	Chr3	transposable_element,transposon_fragment;			hyper	#N/A
Chr3	5957650	5957650	-	1.88433e-09	2.52546e-05	25.558	AT3G17410	gene,mRNA,protein,exon,CDS;			hyper	#N/A
Chr3	10678832	10678832	+	1.93375e-07	0.00095849	25.6946	Chr3	transposable_element,transposon_fragment;			hyper	#N/A
Chr1	19171883	19171883	-	4.34139e-06	0.00789639	25.698	NONE				hyper	#N/A
Chr1	3980260	3980260	-	2.30685e-08	0.000192001	25.7709	AT1G11785	gene,mRNA,protein;	unknown protein		hyper	#N/A
Chr3	16528516	16528516	+	1.69648e-06	0.00428827	25.8055	AT3G45140	gene,mRNA,protein,exon,CDS;			hyper	#N/A
Chr3	12363015	12363015	+	2.40724e-06	0.00539342	25.9579	AT3G30737	transposable_element_gene,mRNA,exon;Chr3			hyper	#N/A
Chr4	7527227	7527227	+	1.31895e-07	0.000718813	25.974	AT4G12820	gene,mRNA,protein,CDS,exon;			hyper	#N/A
Chr5	15221996	15221996	+	2.25491e-06	0.00519918	26	AT5G38140	gene,mRNA,protein,CDS,exon;			hyper	#N/A
Chr4	7520224	7520224	+	2.9976e-15	1.41468e-10	26.0282	Chr4	transposable_element,transposon_fragment;			hyper	#N/A
Chr2	17488701	17488701	+	3.64131e-09	4.36583e-05	26.0659	Chr2	transposable_element,transposon_fragment;			hyper	#N/A
Chr2	8403653	8403653	+	2.00298e-06	0.00481058	26.1538	NONE				hyper	#N/A
Chr5	9822635	9822635	+	2.10021e-09	2.76467e-05	26.3929	AT5G27730	gene,mRNA,protein,exon,CDS;			hyper	#N/A
Chr5	16681601	16681601	-	1.43587e-06	0.00383262	26.6435	Chr5	transposable_element,transposon_fragment;			hyper	#N/A
Chr5	1559344	1559344	-	7.09461e-11	1.47761e-06	27.1132	NONE				hyper	#N/A
Chr3	8660023	8660023	+	1.91548e-07	0.00095263	27.4323	Chr3	transposable_element,transposon_fragment;			hyper	#N/A
Chr2	6036445	6036445	+	1.51771e-06	0.00397689	27.5458	NONE				hyper	#N/A
Chr1	24857712	24857712	+	2.11617e-06	0.00496402	27.6614	AT1G66640	gene,mRNA,protein,exon,CDS;	RNI-like superfamily protein		hyper	#N/A
Chr5	17095886	17095886	+	5.73319e-07	0.00207981	28.2567	NONE				hyper	#N/A
Chr1	18029223	18029223	-	8.44562e-08	0.000517492	28.2589	NONE				hyper	#N/A
Chr3	14097008	14097008	-	2.05604e-08	0.000176462	28.273	Chr3	transposable_element;			hyper	#N/A
Chr1	17384435	17384435	+	3.82622e-06	0.00729431	28.5441	Chr1	transposable_element,transposon_fragment;			hyper	#N/A
Chr2	13374923	13374923	+	5.15918e-09	5.83856e-05	28.7055	Chr2	transposable_element;			hyper	#N/A
Chr1	26185828	26185828	+	2.87692e-06	0.00602292	28.8889	NONE				hyper	#N/A
Chr2	17488590	17488590	+	2.08016e-06	0.00490908	29.2981	Chr2	transposable_element,transposon_fragment;			hyper	#N/A
Chr4	5783271	5783271	-	1.20541e-10	2.39796e-06	29.6292	AT4G09012	gene,mRNA,protein,CDS,exon;			hyper	#N/A
Chr1	17384447	17384447	+	3.46926e-06	0.00684318	29.7695	Chr1	transposable_element,transposon_fragment;			hyper	#N/A
Chr1	10144752	10144752	+	7.45262e-09	7.92837e-05	30.0303	NONE				hyper	#N/A
Chr4	6560434	6560434	+	6.91854e-09	7.48585e-05	30.1653	AT4G10613	gene,mRNA,exon,five_prime_UTR;			hyper	#N/A
Chr3	9232687	9232687	+	3.94087e-06	0.00741726	30.2586	NONE				hyper	#N/A
Chr1	25929415	25929415	-	1.14633e-06	0.00329576	30.7466	NONE				hyper	#N/A
Chr5	23652671	23652671	+	4.44425e-06	0.00801256	30.8915	AT5G58510	gene,mRNA,protein,CDS,exon;			hyper	#N/A
Chr3	9740169	9740169	+	6.06683e-06	0.00979391	31.3579	Chr3	transposable_element,transposon_fragment;			hyper	#N/A
Chr3	17566900	17566900	+	2.81002e-09	3.56165e-05	32.0062	NONE				hyper	#N/A
Chr3	23207472	23207472	+	1.28345e-06	0.00354304	33.3333	AT3G62725	transposable_element_gene,mRNA,exon;Chr3			hyper	#N/A
Chr5	21091862	21091862	-	9.85605e-07	0.00297641	33.6667	AT5G51890	gene,mRNA,protein,CDS,exon;			hyper	#N/A
Chr1	17384454	17384454	+	1.42598e-06	0.00381309	33.6971	Chr1	transposable_element,transposon_fragment;			hyper	#N/A
Chr1	18931255	18931255	+	4.47556e-07	0.00170425	34.3434	NONE				hyper	#N/A
Chr1	10363136	10363136	+	8.11377e-09	8.42958e-05	34.4836	AT1G29650	transposable_element_gene,mRNA,exon;Chr1	non-LTR retrotransposon family (LINE), has a 1.5e-28 P-value blast match to GB:NP_038603 L1 repeat, Tf subfamily, member 23 (LINE-element) (Mus musculus)		hyper	#N/A
Chr5	1559506	1559506	-	7.89091e-08	0.000490963	34.9265	NONE				hyper	#N/A
Chr2	4871160	4871160	+	1.21864e-08	0.000116261	35.1034	NONE				hyper	#N/A
Chr3	17684025	17684025	+	1.01643e-08	0.000101072	35.5325	NONE				hyper	#N/A
Chr3	16019319	16019319	-	4.43696e-07	0.00169537	35.5932	AT3G44340	gene,mRNA,protein,CDS,exon;			hyper	#N/A
Chr3	17684057	17684057	+	1.41403e-08	0.000131017	35.7143	NONE				hyper	#N/A
Chr1	17384459	17384459	+	1.02718e-08	0.000101385	36.6071	Chr1	transposable_element,transposon_fragment;			hyper	#N/A
Chr1	19171946	19171946	-	1.14908e-13	4.35688e-09	36.934	NONE				hyper	#N/A
Chr5	10613476	10613476	+	1.87403e-11	4.69694e-07	37.0544	NONE				hyper	#N/A
Chr2	8568564	8568564	-	2.08887e-08	0.000178893	37.6642	NONE				hyper	#N/A
Chr4	2020164	2020164	+	3.46541e-07	0.00143007	38.0952	NONE				hyper	#N/A
Chr5	13615666	13615666	+	1.6942e-13	6.11041e-09	39.0244	NONE				hyper	#N/A
Chr5	21091566	21091566	+	4.4061e-08	0.000310259	40.1059	AT5G51890	gene,mRNA,protein,CDS,exon;			hyper	#N/A
Chr5	21091538	21091538	+	5.02925e-09	5.73541e-05	40.2778	AT5G51890	gene,mRNA,protein,CDS,exon;			hyper	#N/A
Chr3	14762106	14762106	-	7.08974e-09	7.63385e-05	41.1993	NONE				hyper	#N/A
Chr2	240724	240724	-	4.19142e-06	0.00771014	41.25	Chr2	transposable_element,transposon_fragment;			hyper	#N/A
Chr4	10248152	10248152	-	1.45402e-06	0.00387407	43.287	NONE				hyper	#N/A
Chr4	5743028	5743028	-	5.56711e-06	0.00927582	43.9951	AT4G08953	transposable_element_gene,mRNA,exon;Chr4			hyper	#N/A
Chr5	1559481	1559481	-	2.30277e-10	4.13584e-06	44.0344	NONE				hyper	#N/A
Chr5	16499241	16499241	-	0	0	44.3038	AT5G41240	gene,mRNA,protein,CDS,exon;Chr5			hyper	#N/A
Chr4	6180323	6180323	+	2.69797e-06	0.0057932	46.78	NONE				hyper	#N/A
Chr1	29263913	29263913	+	1.02057e-10	2.06733e-06	48.0938	AT1G77820	transposable_element_gene,mRNA,exon;Chr1	pseudogene, endonuclease/exonuclease/phosphatase family protein, contains similarity to reverse transcriptase GI:976278 from (Arabidopsis thaliana)		hyper	#N/A
Chr2	9432170	9432170	-	8.5945e-08	0.000523027	48.207	NONE				hyper	#N/A
Chr1	12435636	12435636	+	1.19948e-06	0.00338252	48.9394	NONE				hyper	#N/A
Chr1	29263901	29263901	+	2.30045e-11	5.51635e-07	49.403	AT1G77820	transposable_element_gene,mRNA,exon;Chr1	pseudogene, endonuclease/exonuclease/phosphatase family protein, contains similarity to reverse transcriptase GI:976278 from (Arabidopsis thaliana)		hyper	#N/A
Chr2	8568513	8568513	-	1.34764e-11	3.45573e-07	49.4093	NONE				hyper	#N/A
Chr1	12435630	12435630	+	4.87065e-08	0.000335754	51.1628	NONE				hyper	#N/A
Chr5	10613624	10613624	+	2.1414e-06	0.00501302	56.993	NONE				hyper	#N/A
Chr3	20768654	20768654	+	1.16408e-06	0.00332738	66.6667	AT3G55970	gene,mRNA,protein;			hyper	#N/A
Chr3	16876355	16876355	+	7.56549e-07	0.00249686	69.4257	AT3G45910	gene,mRNA,protein,CDS,exon;			hyper	#N/A
Chr3	10062784	10062784	-	4.90067e-06	0.00853231	83.3333	NONE				hyper	#N/A
Chr4	721772	721772	+	8.93227e-07	0.00279724	85	NONE				hyper	#N/A

## Sheet: 84_CHG5%
chr	start	end	strand	pvalue	qvalue	meth.diff	geneinfo	category	description	10% geneinfo match	hyper/hypo	10% DMbase (start) match
Chr1	8837272	8837272	+	1.68088e-12	1.98263e-07	-34.0735	AT1G25220	gene,mRNA,three_prime_UTR,exon	anthranilate synthase beta subunit 1	OK	hypo	OK
Chr2	9384460	9384460	+	8.68804e-09	0.000532881	29.3096	AT2G22070	gene,mRNA,protein,exon,CDS	pentatricopeptide (PPR) repeat-containing protein	OK	hyper	OK
Chr2	13717413	13717413	+	0	0	-89.2617	AT2G32291	pseudogene,pseudogenic_transcript,pseudogenic_exon	Pseudogene of AT2G31470	OK	hypo	OK
Chr2	13717369	13717369	+	0	0	-82.8571	AT2G32291	pseudogene,pseudogenic_transcript,pseudogenic_exon	Pseudogene of AT2G31470	OK	hypo	OK
Chr2	13717420	13717420	+	0	0	-81.2812	AT2G32291	pseudogene,pseudogenic_transcript,pseudogenic_exon	Pseudogene of AT2G31470	OK	hypo	OK
Chr2	13717359	13717359	+	0	0	-77.0115	AT2G32291	pseudogene,pseudogenic_transcript,pseudogenic_exon	Pseudogene of AT2G31470	OK	hypo	OK
Chr2	13717429	13717429	+	0	0	-76.4034	AT2G32291	pseudogene,pseudogenic_transcript,pseudogenic_exon	Pseudogene of AT2G31470	OK	hypo	OK
Chr2	13717345	13717345	+	3.26185e-11	3.12602e-06	-68.2927	AT2G32291	pseudogene,pseudogenic_transcript,pseudogenic_exon	Pseudogene of AT2G31470	OK	hypo	OK
Chr2	13717555	13717555	+	0	0	-65.7294	AT2G32291	pseudogene,pseudogenic_transcript,pseudogenic_exon	Pseudogene of AT2G31470	OK	hypo	OK
Chr2	13717502	13717502	+	5.92859e-14	8.26432e-09	-59.1406	AT2G32291	pseudogene,pseudogenic_transcript,pseudogenic_exon	Pseudogene of AT2G31470	OK	hypo	OK
Chr2	13717588	13717588	+	1.09283e-11	1.14253e-06	-50.3846	AT2G32291	pseudogene,pseudogenic_transcript,pseudogenic_exon	Pseudogene of AT2G31470	OK	hypo	OK
Chr2	13717557	13717557	-	7.49264e-10	5.9426e-05	-49.243	AT2G32291	pseudogene,pseudogenic_transcript,pseudogenic_exon	Pseudogene of AT2G31470	OK	hypo	OK
Chr2	13717569	13717569	+	3.32414e-10	2.82918e-05	-47.6256	AT2G32291	pseudogene,pseudogenic_transcript,pseudogenic_exon	Pseudogene of AT2G31470	OK	hypo	OK
Chr2	13717515	13717515	+	1.92443e-08	0.00104148	-44.1026	AT2G32291	pseudogene,pseudogenic_transcript,pseudogenic_exon	Pseudogene of AT2G31470	OK	hypo	OK
Chr2	13717517	13717517	-	1.74309e-07	0.0062644	-39.3939	AT2G32291	pseudogene,pseudogenic_transcript,pseudogenic_exon	Pseudogene of AT2G31470	OK	hypo	OK
Chr2	13717571	13717571	-	1.81094e-07	0.00645781	-34.7858	AT2G32291	pseudogene,pseudogenic_transcript,pseudogenic_exon	Pseudogene of AT2G31470	OK	hypo	OK
Chr3	9394128	9394128	-	6.61515e-12	7.07687e-07	-34.9453	AT3G25727	gene,mRNA,protein,CDS,exon	BEST Arabidopsis thaliana protein match is: RNA-directed DNA polymerase (reverse transcriptase)-related family protein (TAIR:AT2G02520.1)	OK	hypo	OK
Chr3	22071016	22071016	-	7.87866e-08	0.00323596	50.2525	AT3G59750	gene,mRNA,protein,CDS,exon	Concanavalin A-like lectin protein kinase family protein	OK	hyper	OK
Chr3	23079146	23079146	-	2.87673e-07	0.00958935	32.8699	AT3G62360	gene,mRNA,protein	Carbohydrate-binding-like fold	OK	hyper	OK
Chr5	9680688	9680688	+	3.38263e-10	2.82918e-05	30	AT5G27410	gene,mRNA,protein,exon,CDS	D-aminoacid aminotransferase-like PLP-dependent enzymes superfamily protein	OK	hyper	OK
Chr5	12662429	12662429	+	0	0	-54.7584	AT5G33390	gene,mRNA,protein,exon,CDS	glycine-rich protein	OK	hypo	OK
Chr5	12662459	12662459	+	0	0	-49.6855	AT5G33390	gene,mRNA,protein,exon,CDS	glycine-rich protein	OK	hypo	OK
Chr5	12662423	12662423	+	1.11022e-16	2.04287e-11	-48.2353	AT5G33390	gene,mRNA,protein,exon,CDS	glycine-rich protein	OK	hypo	OK
Chr5	12662393	12662393	+	9.80394e-09	0.000593413	-46.0784	AT5G33390	gene,mRNA,protein,exon,CDS	glycine-rich protein	OK	hypo	OK
Chr5	12662438	12662438	+	0	0	-43.9223	AT5G33390	gene,mRNA,protein,exon,CDS	glycine-rich protein	OK	hypo	OK
Chr5	12662453	12662453	+	0	0	-43.1626	AT5G33390	gene,mRNA,protein,exon,CDS	glycine-rich protein	OK	hypo	OK
Chr5	12662408	12662408	+	1.26724e-09	9.10857e-05	-41.0395	AT5G33390	gene,mRNA,protein,exon,CDS	glycine-rich protein	OK	hypo	OK
Chr5	12662414	12662414	+	2.54907e-12	2.93151e-07	-39.3205	AT5G33390	gene,mRNA,protein,exon,CDS	glycine-rich protein	OK	hypo	OK
Chr5	12662444	12662444	+	2.22045e-16	3.92859e-11	-37.3649	AT5G33390	gene,mRNA,protein,exon,CDS	glycine-rich protein	OK	hypo	OK
Chr5	12662489	12662489	+	1.11022e-16	2.04287e-11	-32.0254	AT5G33390	gene,mRNA,protein,exon,CDS	glycine-rich protein	OK	hypo	OK
Chr5	12662468	12662468	+	6.99441e-15	1.10949e-09	-30.9676	AT5G33390	gene,mRNA,protein,exon,CDS	glycine-rich protein	OK	hypo	OK
Chr5	12662474	12662474	+	2.59237e-13	3.31256e-08	-25.2766	AT5G33390	gene,mRNA,protein,exon,CDS	glycine-rich protein	OK	hypo	OK
Chr5	16600960	16600960	-	3.18407e-08	0.00159208	29.9898	AT5G41490	gene,mRNA,protein,exon,CDS	F-box associated ubiquitination effector family protein	OK	hyper	OK
Chr3	11054068	11054068	-	2.15884e-08	0.00115476	-31.2594	Chr3	transposable_element,transposon_fragment			hypo	OK
Chr2	72541	72541	+	6.78224e-08	0.00286231	27.8968	NONE				hyper	OK
Chr4	2335615	2335615	+	4.32487e-12	4.73689e-07	30.1555	NONE				hyper	OK
Chr4	2335713	2335713	+	5.81798e-08	0.0025454	37.697	NONE				hyper	OK
Chr3	15808110	15808110	-	1.15463e-14	1.77048e-09	38.685	NONE				hyper	OK
Chr3	21509736	21509736	+	1.26565e-14	1.87812e-09	40.312	NONE				hyper	OK
Chr3	21509527	21509527	-	2.78185e-08	0.00145419	40.9848	NONE				hyper	OK
Chr3	15807932	15807932	-	8.59401e-10	6.58892e-05	42.6742	NONE				hyper	OK
Chr3	9232690	9232690	+	1.1394e-11	1.16475e-06	43.3252	NONE				hyper	OK
Chr3	9232674	9232674	+	0	0	44.5372	NONE				hyper	OK
Chr3	21509695	21509695	+	0	0	48.2224	NONE				hyper	OK
Chr3	21509722	21509722	+	0	0	51.1862	NONE				hyper	OK
Chr3	21509746	21509746	+	0	0	51.4274	NONE				hyper	OK
Chr3	557970	557970	+	0	0	53.9459	NONE				hyper	OK
Chr4	1063734	1063734	-	0	0	54.1954	NONE				hyper	OK
Chr3	11593408	11593408	-	4.76791e-10	3.9166e-05	-27.3211	AT3G29762	pseudogene,pseudogenic_transcript,pseudogenic_exon	pseudogene, RNA polymerase A beta prime subunit (fragment), similar to RNA polymerase A beta prime subunit GB:CAB48413 (Chloroplast Sinapis alba)	OK	hypo	#N/A
Chr4	14995894	14995894	+	1.15451e-07	0.00446292	55.5556	AT4G30790	gene,mRNA,protein,CDS,exon	INVOLVED IN: autophagy	OK	hyper	#N/A
Chr1	2158043	2158043	+	1.59861e-12	1.93521e-07	26.962	AT1G07025	gene,mRNA,protein,CDS,exon	Mitochondrial substrate carrier family protein		hyper	#N/A
Chr1	2158045	2158045	-	9.48226e-08	0.00374098	28.0056	AT1G07025	gene,mRNA,protein,CDS,exon	Mitochondrial substrate carrier family protein		hyper	#N/A
Chr1	2158085	2158085	+	0	0	33.3566	AT1G07025	gene,mRNA,protein,CDS,exon	Mitochondrial substrate carrier family protein		hyper	#N/A
Chr1	5566059	5566059	+	2.16663e-10	1.91668e-05	-29.8851	AT1G16270	gene,mRNA,protein,exon,CDS	Protein kinase superfamily protein with octicosapeptide/Phox/Bem1p domain		hypo	#N/A
Chr1	12595326	12595326	-	1.62859e-07	0.0059458	35.6341	AT1G34460	gene,mRNA,protein	5|CYC3		hyper	#N/A
Chr3	8048179	8048179	-	2.80127e-07	0.00940596	37.5725	AT3G22770	gene,mRNA,protein,CDS,exon	F-box associated ubiquitination effector family protein		hyper	#N/A
Chr3	18672192	18672192	-	4.86137e-10	3.92332e-05	29.6296	AT3G50350	gene,mRNA,protein,exon,CDS	Protein of unknown function (DUF1685)		hyper	#N/A
Chr3	18672210	18672210	-	5.12496e-08	0.00235754	30.5316	AT3G50350	gene,mRNA,protein,exon,CDS	Protein of unknown function (DUF1685)		hyper	#N/A
Chr5	1642921	1642921	-	3.00761e-09	0.000192158	-29.8851	AT5G05560	gene,mRNA,protein,exon,CDS	E3 ubiquitin ligase, putative		hypo	#N/A
Chr5	14273188	14273188	+	0	0	33.2851	AT5G36228	gene,mRNA,exon,three_prime_UTR	nucleic acid binding		hyper	#N/A
Chr5	14273225	14273225	+	0	0	57.6951	AT5G36228	gene,mRNA,exon,three_prime_UTR	nucleic acid binding		hyper	#N/A
Chr5	19195419	19195419	+	3.92475e-08	0.00190045	28.8337	AT5G47280	gene,mRNA,protein,exon,CDS	ADR1-like 3		hyper	#N/A
Chr1	18033891	18033891	-	5.03702e-08	0.00235754	-41.298	Chr1	transposable_element			hypo	#N/A
Chr3	17580075	17580075	+	1.39837e-09	9.60102e-05	26.0504	Chr3	transposable_element,transposon_fragment			hyper	#N/A
Chr3	17580113	17580113	+	3.57405e-11	3.35532e-06	30.4968	Chr3	transposable_element,transposon_fragment			hyper	#N/A
Chr3	17580058	17580058	+	3.18344e-11	3.11579e-06	69.0476	Chr3	transposable_element,transposon_fragment			hyper	#N/A
Chr4	5314664	5314664	+	2.00489e-07	0.00698691	-32.7381	NONE				hypo	#N/A
Chr4	1938611	1938611	+	6.4195e-08	0.00275986	-32.2193	NONE				hypo	#N/A
Chr5	19675505	19675505	-	6.97465e-08	0.00291675	-26.7894	NONE				hypo	#N/A
Chr4	6977656	6977656	+	1.1384e-08	0.000671381	26.548	NONE				hyper	#N/A
Chr3	21509583	21509583	+	9.51485e-08	0.00374098	27.9834	NONE				hyper	#N/A
Chr4	6977644	6977644	+	9.04356e-10	6.81991e-05	28.1132	NONE				hyper	#N/A
Chr4	6977658	6977658	-	1.2401e-08	0.000713079	30.0241	NONE				hyper	#N/A
Chr1	10144605	10144605	+	5.6781e-08	0.00252232	31.7556	NONE				hyper	#N/A
Chr1	9925398	9925398	-	0	0	36.1713	NONE				hyper	#N/A
Chr1	19226771	19226771	-	1.5294e-09	0.000101963	37.6623	NONE				hyper	#N/A
Chr4	6977646	6977646	-	4.88498e-15	8.02554e-10	38.0339	NONE				hyper	#N/A
Chr1	25216051	25216051	+	3.50783e-08	0.00171665	41.039	NONE				hyper	#N/A
Chr3	21509688	21509688	+	2.65866e-10	2.30758e-05	42.7946	NONE				hyper	#N/A
Chr1	25216086	25216086	+	2.55534e-07	0.0086433	42.924	NONE				hyper	#N/A
Chr3	17520431	17520431	-	1.21326e-08	0.000706476	44.0678	NONE				hyper	#N/A
Chr1	19226783	19226783	-	1.55095e-11	1.55099e-06	45.9459	NONE				hyper	#N/A
Chr3	16798132	16798132	+	8.96331e-08	0.00358542	53.0303	NONE				hyper	#N/A
Chr3	17579993	17579993	-	7.8935e-10	6.15442e-05	77.551	NONE				hyper	#N/A

## Sheet: 613_CHH5%
chr	start	end	strand	pvalue	qvalue	meth.diff	geneinfo	category1	description	10% geneinfo match	hyper/hypo	10% DMbase (start) match
Chr1	9630648	9630648	+	2.17532e-06	0.000520068	-29.1667	AT1G27671	pseudogene,pseudogenic_transcript,pseudogenic_exon;	pseudogene of DRM2/DMT7 (domain rearranged methyltransferase protein)	OK	hypo	OK
Chr1	8837263	8837263	+	1.37819e-08	8.87699e-06	-27.5084	AT1G25220	gene,mRNA,three_prime_UTR,exon;	anthranilate synthase beta subunit 1	OK	hypo	OK
Chr1	8837280	8837280	+	3.87161e-09	3.18339e-06	-25.6134	AT1G25220	gene,mRNA,three_prime_UTR,exon;	anthranilate synthase beta subunit 1	OK	hypo	OK
Chr1	10363037	10363037	+	7.15937e-06	0.00134339	-27.325	AT1G29650	transposable_element_gene,mRNA,exon;Chr1	non-LTR retrotransposon family (LINE), has a 1.5e-28 P-value blast match to GB:NP_038603 L1 repeat, Tf subfamily, member 23 (LINE-element) (Mus musculus)	OK	hypo	#N/A
Chr1	17256515	17256515	+	5.36238e-14	2.93218e-10	-25.7449	AT1G46624	transposable_element_gene,mRNA,exon;	gypsy-like retrotransposon family, has a 4.3e-213 P-value blast match to GB:AAD11615 prpol (gypsy_Ty3-element) (Zea mays)	OK	hypo	#N/A
Chr1	16283160	16283160	+	8.52922e-05	0.00943977	-75	AT1G43200	transposable_element_gene,mRNA,exon;Chr1	pseudogene, hypothetical protein, contains Pfam profile PF03384: Drosophila protein of unknown function, DUF287		hypo	#N/A
Chr1	16299095	16299095	+	3.16183e-05	0.00435576	-67.8571	Chr1	transposable_element,transposon_fragment;			hypo	#N/A
Chr1	8457385	8457385	+	1.5079e-05	0.00242508	-58.3333	Chr1	transposable_element,transposon_fragment;			hypo	#N/A
Chr1	30251603	30251603	+	6.18134e-07	0.00018965	-54.5455	Chr1	transposable_element,transposon_fragment;			hypo	#N/A
Chr1	20319651	20319651	+	3.66075e-05	0.004891	-51.6667	NONE				hypo	#N/A
Chr1	16755065	16755065	+	7.67262e-05	0.00868436	-48	AT1G44080	gene,mRNA,protein;Chr1	F-box family protein with a domain of unknown function (DUF295)		hypo	#N/A
Chr1	15468075	15468075	+	8.51578e-06	0.00154038	-38.2353	Chr1	transposable_element,transposon_fragment;			hypo	#N/A
Chr1	28470889	28470889	+	7.36182e-06	0.00137367	-38.0094	NONE				hypo	#N/A
Chr1	4330144	4330144	+	5.59302e-08	2.75344e-05	-37.5616	Chr1	transposable_element,transposon_fragment;			hypo	#N/A
Chr1	14020213	14020213	+	1.55513e-07	6.30982e-05	-37.1429	AT1G36975	transposable_element_gene,mRNA,exon;	gypsy-like retrotransposon family, has a 1.4e-171 P-value blast match to GB:AAD22153 polyprotein (Gypsy_Ty3-element) (Sorghum bicolor)		hypo	#N/A
Chr1	16663733	16663733	+	7.9904e-05	0.00896578	-36.3091	AT1G43930	transposable_element_gene,mRNA,exon;Chr1	Mutator-like transposase family, has a 1.2e-56 P-value blast match to GB:AAA21566 mudrA of transposon=MuDR (MuDr-element) (Zea mays)		hypo	#N/A
Chr1	29379669	29379669	+	5.23796e-07	0.000165919	-36	AT1G78095	transposable_element_gene,mRNA,exon;	Mutator-like transposase family, has a 5.0e-45 P-value blast match to GB:AAA21566 mudrA of transposon=MuDR (MuDr-element) (Zea mays)		hypo	#N/A
Chr1	13131784	13131784	+	1.04067e-06	0.000288283	-35.5769	Chr1	transposable_element,transposon_fragment;			hypo	#N/A
Chr1	10156262	10156262	+	1.86615e-05	0.00287153	-35.2137	Chr1	transposable_element,transposon_fragment;			hypo	#N/A
Chr1	12581815	12581815	+	1.88708e-06	0.000464741	-34.9038	NONE				hypo	#N/A
Chr1	27635623	27635623	+	1.02171e-05	0.00178128	-34.8518	NONE				hypo	#N/A
Chr1	16892169	16892169	+	8.33884e-05	0.00926902	-34.6154	NONE				hypo	#N/A
Chr1	13148461	13148461	+	3.27975e-05	0.0044868	-34.5653	NONE				hypo	#N/A
Chr1	13491758	13491758	+	7.91079e-05	0.00889598	-34.4828	AT1G36095	gene,mRNA,protein,CDS,exon;	DNA binding		hypo	#N/A
Chr1	15511713	15511713	+	1.46654e-05	0.00237216	-34.4828	AT1G41740	transposable_element_gene,mRNA,exon;Chr1	gypsy-like retrotransposon family, has a 2.8e-119 P-value blast match to GB:CAA73042 polyprotein (Gypsy_Ty3-element) (Ananas comosus)		hypo	#N/A
Chr1	16691739	16691739	+	6.67467e-06	0.0012714	-34.236	NONE				hypo	#N/A
Chr1	21451514	21451514	+	1.95027e-09	1.82455e-06	-33.7453	AT1G58020	transposable_element_gene,mRNA,exon;Chr1	non-LTR retrotransposon family (LINE), has a 3.7e-49 P-value blast match to GB:NP_038603 L1 repeat, Tf subfamily, member 23 (LINE-element) (Mus musculus)		hypo	#N/A
Chr1	25161288	25161288	+	1.12624e-05	0.00192373	-33.3995	AT1G67240	transposable_element_gene,mRNA,exon;Chr1	Mutator-like transposase family, has a 4.5e-23 P-value blast match to GB:AAA21566 mudrA of transposon=MuDR (MuDr-element) (Zea mays)		hypo	#N/A
Chr1	11149231	11149231	+	2.99521e-07	0.000106571	-33.3333	AT1G31210	transposable_element_gene,mRNA,exon;Chr1	copia-like retrotransposon family, has a 2.3e-253 P-value blast match to dbj|BAA78425.1| polyprotein (Arabidopsis thaliana) (AtRE1) (Ty1_Copia-element)		hypo	#N/A
Chr1	21471358	21471358	+	5.85673e-05	0.00705212	-33.3333	NONE				hypo	#N/A
Chr1	16286450	16286450	+	1.09185e-05	0.00187781	-32.6549	Chr1	transposable_element,transposon_fragment;			hypo	#N/A
Chr1	13491145	13491145	+	3.14265e-05	0.00433441	-32.5926	NONE				hypo	#N/A
Chr1	28527382	28527382	+	4.19616e-05	0.00543946	-32.4447	Chr1	transposable_element,transposon_fragment;			hypo	#N/A
Chr1	16113074	16113074	+	2.01362e-07	7.74916e-05	-32.3085	AT1G42888	transposable_element_gene,mRNA,exon;Chr1	gypsy-like retrotransposon family (Athila), has a 4.6e-24 P-value blast match to GB:CAA57397 Athila ORF 1 (Arabidopsis thaliana)		hypo	#N/A
Chr1	11305725	11305725	+	3.45293e-05	0.00467047	-32.0772	AT1G31570	transposable_element_gene,mRNA,exon;Chr1	CACTA-like transposase family (Tnp2/En/Spm), has a 0. P-value blast match to gb|AAG52024.1|AC022456_5 Tam1-homologous transposon protein TNP2, putative		hypo	#N/A
Chr1	13916345	13916345	+	7.09735e-05	0.00818183	-31.9601	Chr1	transposable_element,transposon_fragment;			hypo	#N/A
Chr1	15182680	15182680	+	1.48278e-05	0.00239353	-31.9149	AT1G40117	transposable_element_gene,mRNA,exon;Chr1	gypsy-like retrotransposon family (Athila), has a 1.8e-281 P-value blast match to GB:CAA57397 Athila ORF 1 (Arabidopsis thaliana)		hypo	#N/A
Chr1	21452306	21452306	+	1.98728e-05	0.00301909	-31.5789	AT1G58020	transposable_element_gene,mRNA,exon;Chr1	non-LTR retrotransposon family (LINE), has a 3.7e-49 P-value blast match to GB:NP_038603 L1 repeat, Tf subfamily, member 23 (LINE-element) (Mus musculus)		hypo	#N/A
Chr1	13889045	13889045	+	5.11895e-06	0.00103088	-31.3725	Chr1	transposable_element,transposon_fragment;			hypo	#N/A
Chr1	16611338	16611338	+	4.33279e-05	0.00558042	-31.25	Chr1	transposable_element,transposon_fragment;			hypo	#N/A
Chr1	29477372	29477372	+	6.12869e-05	0.00730831	-31.25	AT1G78350	transposable_element_gene,mRNA,exon;Chr1	Mutator-like transposase family, has a 9.0e-42 P-value blast match to GB:AAA21566 mudrA of transposon=MuDR (MuDr-element) (Zea mays)		hypo	#N/A
Chr1	16663725	16663725	+	3.36886e-05	0.00458138	-30.9524	AT1G43930	transposable_element_gene,mRNA,exon;Chr1	Mutator-like transposase family, has a 1.2e-56 P-value blast match to GB:AAA21566 mudrA of transposon=MuDR (MuDr-element) (Zea mays)		hypo	#N/A
Chr1	8731900	8731900	+	4.53167e-10	5.54916e-07	-30.8918	AT1G24640	transposable_element_gene,mRNA,exon;Chr1	non-LTR retrotransposon family (LINE), has a 4.3e-37 P-value blast match to GB:NP_038602 L1 repeat, Tf subfamily, member 18 (LINE-element) (Mus musculus)		hypo	#N/A
Chr1	23296595	23296595	+	8.18426e-06	0.00149328	-30.6093	Chr1	transposable_element,transposon_fragment;			hypo	#N/A
Chr1	13150194	13150194	+	1.01004e-06	0.000281872	-30.5556	Chr1	transposable_element,transposon_fragment;			hypo	#N/A
Chr1	14222777	14222777	+	5.4019e-05	0.00662608	-30.3831	AT1G37340	transposable_element_gene,mRNA,exon;Chr1	gypsy-like retrotransposon family (Athila), has a 9.2e-199 P-value blast match to GB:CAA57397 Athila ORF 1 (Arabidopsis thaliana)		hypo	#N/A
Chr1	19338644	19338644	+	7.49146e-06	0.00139218	-30.303	AT1G52010	transposable_element_gene,mRNA,exon;Chr1	Mutator-like transposase family, has a 2.8e-81 P-value blast match to O65231 /281-442 Pfam PF03108 MuDR family transposase (MuDr-element domain)		hypo	#N/A
Chr1	18303246	18303246	+	1.75397e-06	0.000437857	-30.2326	AT1G49440	transposable_element_gene,mRNA,exon;Chr1	non-LTR retrotransposon family (LINE), has a 3.6e-05 P-value blast match to GB:AAB41224 ORF2 (LINE-element) (Rattus norvegicus)		hypo	#N/A
Chr1	16079301	16079301	+	3.05069e-06	0.000682699	-30	Chr1	transposable_element,transposon_fragment;			hypo	#N/A
Chr1	15149564	15149564	+	2.73454e-05	0.00388623	-29.5455	Chr1	transposable_element,transposon_fragment;			hypo	#N/A
Chr1	15563754	15563754	+	8.82149e-05	0.00968428	-29.5455	Chr1	transposable_element,transposon_fragment;			hypo	#N/A
Chr1	22105283	22105283	+	7.81512e-05	0.00881055	-29.4851	Chr1	transposable_element,transposon_fragment;			hypo	#N/A
Chr1	17529572	17529572	+	9.33858e-06	0.00165809	-29.4643	NONE				hypo	#N/A
Chr1	17406643	17406643	+	3.76716e-08	2.00009e-05	-29.4085	Chr1	transposable_element,transposon_fragment;			hypo	#N/A
Chr1	14499932	14499932	+	6.84868e-06	0.00129709	-29.2683	Chr1	transposable_element,transposon_fragment;			hypo	#N/A
Chr1	21602205	21602205	+	1.58577e-05	0.0025231	-29.2498	NONE				hypo	#N/A
Chr1	17280488	17280488	+	2.6562e-05	0.00379793	-29.2048	NONE				hypo	#N/A
Chr1	14435041	14435041	+	9.7427e-08	4.32509e-05	-29.2033	AT1G38350	transposable_element_gene,mRNA,exon;Chr1	gypsy-like retrotransposon family (Athila), has a 1.8e-278 P-value blast match to GB:CAA57397 Athila ORF 1 (Arabidopsis thaliana)		hypo	#N/A
Chr1	12581833	12581833	+	1.57423e-05	0.00250897	-29.2006	NONE				hypo	#N/A
Chr1	5916261	5916261	+	1.35716e-07	5.65876e-05	-29.1259	Chr1	transposable_element,transposon_fragment;			hypo	#N/A
Chr1	15445744	15445744	+	1.03593e-05	0.00180112	-29.0909	Chr1	transposable_element,transposon_fragment;			hypo	#N/A
Chr1	13787981	13787981	+	1.16052e-08	7.74252e-06	-28.5824	Chr1	transposable_element,transposon_fragment;			hypo	#N/A
Chr1	16581677	16581677	+	5.99082e-06	0.00116692	-28.5714	NONE				hypo	#N/A
Chr1	21992327	21992327	+	2.08971e-06	0.000504076	-28.5714	AT1G59770	transposable_element_gene,mRNA,exon;Chr1	hAT-like transposase family (hobo/Ac/Tam3), has a 5.2e-49 P-value blast match to GB:AAD24567 transposase Tag2 (hAT-element) (Arabidopsis thaliana)		hypo	#N/A
Chr1	13178066	13178066	+	1.83763e-05	0.0028371	-28.4864	Chr1	transposable_element,transposon_fragment;			hypo	#N/A
Chr1	16087051	16087051	+	4.6465e-08	2.36868e-05	-28.3638	AT1G42727	transposable_element_gene,mRNA,exon;Chr1	CACTA-like transposase family (Ptta/En/Spm), has a 2.4e-35 P-value blast match to At5g29026.1/8-244 CACTA-like transposase family (Ptta/En/Spm) (CACTA-element) (Arabidopsis thaliana)		hypo	#N/A
Chr1	14249897	14249897	+	1.48226e-07	6.07903e-05	-28.3582	AT1G37669	transposable_element_gene,mRNA,exon;Chr1	gypsy-like retrotransposon family (Athila), has a 2.0e-258 P-value blast match to GB:CAA57397 Athila ORF 1 (Arabidopsis thaliana)		hypo	#N/A
Chr1	4683331	4683331	+	1.7256e-06	0.00043208	-28	AT1G13660	transposable_element_gene,mRNA,exon;Chr1	Mutator-like transposase family, has a 2.6e-36 P-value blast match to GB:AAA21566 mudrA of transposon=MuDR (MuDr-element) (Zea mays)		hypo	#N/A
Chr1	16588000	16588000	+	6.2284e-05	0.00740298	-28	AT1G43830	transposable_element_gene,mRNA,exon;Chr1	gypsy-like retrotransposon family (Athila), has a 2.0e-118 P-value blast match to gb|AAL06421.1|AF378079_1 reverse transcriptase (Athila4) (Arabidopsis thaliana) (Gypsy_Ty3-family)		hypo	#N/A
Chr1	5914620	5914620	+	1.87303e-06	0.000462132	-27.907	AT1G17275	transposable_element_gene,mRNA,exon;Chr1	Mutator-like transposase family, has a 5.8e-31 P-value blast match to GB:AAA21566 mudrA of transposon=MuDR (MuDr-element) (Zea mays)		hypo	#N/A
Chr1	14207717	14207717	+	7.34643e-07	0.000218095	-27.8223	Chr1	transposable_element,transposon_fragment;			hypo	#N/A
Chr1	15454071	15454071	+	1.42459e-06	0.000371091	-27.7681	Chr1	transposable_element,transposon_fragment;			hypo	#N/A
Chr1	20314065	20314065	+	5.70326e-05	0.00691068	-27.7464	AT1G54430	transposable_element_gene,mRNA,exon;Chr1	similar to unknown protein [Arabidopsis thaliana] (TAIR:AT3G13250.1)		hypo	#N/A
Chr1	16610414	16610414	+	8.911e-06	0.00159672	-27.641	AT1G43840	transposable_element_gene,mRNA,exon;Chr1	CACTA-like transposase family (Ptta/En/Spm), has a 5.2e-121 P-value blast match to At5g36655.1/81-333 CACTA-like transposase family (Ptta/En/Spm) (CACTA-element) (Arabidopsis thaliana)		hypo	#N/A
Chr1	19676819	19676819	+	1.03138e-06	0.000286384	-27.5149	Chr1	transposable_element,transposon_fragment;			hypo	#N/A
Chr1	15053431	15053431	+	3.71763e-05	0.0049484	-27.5	NONE				hypo	#N/A
Chr1	13792522	13792522	+	3.38347e-08	1.83539e-05	-27.4478	AT1G36540	transposable_element_gene,mRNA,exon;Chr1	gypsy-like retrotransposon family (Athila), has a 2.7e-301 P-value blast match to GB:CAA57397 Athila ORF 1 (Arabidopsis thaliana)		hypo	#N/A
Chr1	9707449	9707449	+	3.65057e-09	3.03056e-06	-27.4351	NONE				hypo	#N/A
Chr1	6541256	6541256	+	1.24081e-05	0.00207714	-27.3896	Chr1	transposable_element,transposon_fragment;			hypo	#N/A
Chr1	5099885	5099885	+	4.78575e-07	0.000154164	-26.9841	AT1G14800	gene,mRNA,protein,exon,CDS;	Nucleic acid-binding, OB-fold-like protein		hypo	#N/A
Chr1	16725248	16725248	+	8.9373e-14	4.48236e-10	-26.8693	AT1G44030	gene,mRNA,protein,CDS,exon;	Cysteine/Histidine-rich C1 domain family protein		hypo	#N/A
Chr1	14218877	14218877	+	3.26828e-07	0.00011422	-26.8627	AT1G37340	transposable_element_gene,mRNA,exon;Chr1	gypsy-like retrotransposon family (Athila), has a 9.2e-199 P-value blast match to GB:CAA57397 Athila ORF 1 (Arabidopsis thaliana)		hypo	#N/A
Chr1	16502053	16502053	+	2.93221e-05	0.00410539	-26.7857	AT1G43724	transposable_element_gene,mRNA,exon;Chr1	copia-like retrotransposon family, has a 3.1e-61 P-value blast match to GB:AAC02666 polyprotein (Ty1_Copia-element) (Arabidopsis thaliana)		hypo	#N/A
Chr1	16389379	16389379	+	1.38965e-08	8.93591e-06	-26.7239	AT1G43502	transposable_element_gene,mRNA,exon;	gypsy-like retrotransposon family, has a 1.1e-158 P-value blast match to GB:AAD27547 polyprotein (Gypsy_Ty3-element) (Oryza sativa subsp. indica)		hypo	#N/A
Chr1	7352903	7352903	+	1.07841e-05	0.00185906	-26.7152	NONE				hypo	#N/A
Chr1	13509294	13509294	+	3.93379e-07	0.000132339	-26.6789	Chr1	transposable_element,transposon_fragment;			hypo	#N/A
Chr1	13666028	13666028	+	1.20098e-05	0.002024	-26.6092	Chr1	transposable_element,transposon_fragment;			hypo	#N/A
Chr1	16384192	16384192	+	6.2788e-09	4.68206e-06	-26.5823	AT1G43444	transposable_element_gene,mRNA,exon;Chr1	gypsy-like retrotransposon family, has a 7.2e-242 P-value blast match to GB:AAD27547 polyprotein (Gypsy_Ty3-element) (Oryza sativa subsp. indica)		hypo	#N/A
Chr1	17361883	17361883	+	1.99696e-05	0.00302963	-26.5083	AT1G47360	transposable_element_gene,mRNA,exon;Chr1	copia-like retrotransposon family, has a 1.2e-307 P-value blast match to GB:CAA31653 polyprotein (Ty1_Copia-element) (Arabidopsis thaliana)		hypo	#N/A
Chr1	13560628	13560628	+	1.77636e-15	1.5723e-11	-26.3514	AT1G36185	transposable_element_gene,mRNA,exon;Chr1	copia-like retrotransposon family, has a 0. P-value blast match to GB:CAA72989 open reading frame 1 (Ty1_Copia-element) (Brassica oleracea)		hypo	#N/A
Chr1	4334099	4334099	+	6.64705e-06	0.00126758	-26.3472	Chr1	transposable_element,transposon_fragment;			hypo	#N/A
Chr1	18303796	18303796	+	8.77305e-05	0.00964465	-26.3158	AT1G49440	transposable_element_gene,mRNA,exon;Chr1	non-LTR retrotransposon family (LINE), has a 3.6e-05 P-value blast match to GB:AAB41224 ORF2 (LINE-element) (Rattus norvegicus)		hypo	#N/A
Chr1	15952163	15952163	+	8.46254e-05	0.00937802	-26.3001	AT1G42500	transposable_element_gene,mRNA,exon;Chr1	CACTA-like transposase family (Ptta/En/Spm), has a 1.8e-101 P-value blast match to At5g36655.1/81-333 CACTA-like transposase family (Ptta/En/Spm) (CACTA-element) (Arabidopsis thaliana)		hypo	#N/A
Chr1	12715996	12715996	+	6.9667e-05	0.00806766	-26.2547	AT1G34700	transposable_element_gene,mRNA,exon;Chr1	Mutator-like transposase family, has a 2.6e-83 P-value blast match to O65231 /281-442 Pfam PF03108 MuDR family transposase (MuDr-element domain)		hypo	#N/A
Chr1	15208321	15208321	+	4.56923e-07	0.000148697	-26.2295	Chr1	transposable_element,transposon_fragment;			hypo	#N/A
Chr1	12836545	12836545	+	4.54129e-05	0.0057901	-26.1905	AT1G35110	transposable_element_gene,mRNA;Chr1	similar to Ulp1 protease family protein [Arabidopsis thaliana] (TAIR:AT5G28970.1)		hypo	#N/A
Chr1	16386144	16386144	+	5.60263e-05	0.00681367	-26.1893	AT1G43444	transposable_element_gene,mRNA,exon;Chr1	gypsy-like retrotransposon family, has a 7.2e-242 P-value blast match to GB:AAD27547 polyprotein (Gypsy_Ty3-element) (Oryza sativa subsp. indica)		hypo	#N/A
Chr1	12672539	12672539	+	1.16226e-06	0.000315033	-26.1207	AT1G34600	transposable_element_gene,mRNA,exon;Chr1	gypsy-like retrotransposon family, has a 1.1e-135 P-value blast match to GB:AAD19359 polyprotein (gypsy_Ty3-element) (Sorghum bicolor)		hypo	#N/A
Chr1	12079681	12079681	+	3.27959e-06	0.000722578	-26.087	NONE				hypo	#N/A
Chr1	16626309	16626309	+	2.00861e-09	1.86607e-06	-26.0652	Chr1	transposable_element,transposon_fragment;			hypo	#N/A
Chr1	15072315	15072315	+	6.0968e-05	0.00727991	-25.9577	AT1G40101	transposable_element_gene,mRNA,exon;Chr1	gypsy-like retrotransposon family (Athila), has a 5.6e-152 P-value blast match to GB:CAA57397 Athila ORF 1 (Arabidopsis thaliana)		hypo	#N/A
Chr1	15445765	15445765	+	2.67487e-05	0.00381829	-25.9259	Chr1	transposable_element,transposon_fragment;			hypo	#N/A
Chr1	25159511	25159511	+	3.75609e-05	0.00499035	-25.9259	AT1G67240	transposable_element_gene,mRNA,exon;Chr1	Mutator-like transposase family, has a 4.5e-23 P-value blast match to GB:AAA21566 mudrA of transposon=MuDR (MuDr-element) (Zea mays)		hypo	#N/A
Chr1	6658884	6658884	+	1.15403e-07	4.97608e-05	-25.8884	AT1G19260	gene,mRNA,protein,CDS,exon;	TTF-type zinc finger protein with HAT dimerisation domain		hypo	#N/A
Chr1	13300306	13300306	+	4.27485e-06	0.000893927	-25.8308	Chr1	transposable_element,transposon_fragment;			hypo	#N/A
Chr1	11308636	11308636	+	1.50033e-06	0.000387049	-25.8065	AT1G31570	transposable_element_gene,mRNA,exon;Chr1	CACTA-like transposase family (Tnp2/En/Spm), has a 0. P-value blast match to gb|AAG52024.1|AC022456_5 Tam1-homologous transposon protein TNP2, putative		hypo	#N/A
Chr1	21125609	21125609	+	2.68293e-05	0.00382684	-25.8065	Chr1	transposable_element,transposon_fragment;			hypo	#N/A
Chr1	12907417	12907417	+	1.49756e-07	6.12171e-05	-25.8003	Chr1	transposable_element;			hypo	#N/A
Chr1	16743019	16743019	+	9.83494e-10	1.04438e-06	-25.7426	Chr1	transposable_element,transposon_fragment;			hypo	#N/A
Chr1	7355463	7355463	+	7.66311e-05	0.00867612	-25.7143	AT1G21020	transposable_element_gene,mRNA,exon;Chr1	similar to Ulp1 protease family protein [Arabidopsis thaliana] (TAIR:AT1G08740.1)		hypo	#N/A
Chr1	16117450	16117450	+	6.74783e-05	0.0078718	-25.641	NONE				hypo	#N/A
Chr1	14435081	14435081	+	1.19144e-06	0.000321342	-25.619	AT1G38350	transposable_element_gene,mRNA,exon;Chr1	gypsy-like retrotransposon family (Athila), has a 1.8e-278 P-value blast match to GB:CAA57397 Athila ORF 1 (Arabidopsis thaliana)		hypo	#N/A
Chr1	14095972	14095972	+	5.14635e-06	0.00103519	-25.5804	AT1G37057	transposable_element_gene,mRNA,exon;Chr1	hAT-like transposase family (hobo/Ac/Tam3), has a 7.8e-25 P-value blast match to GB:AAD24567 transposase Tag2 (hAT-element) (Arabidopsis thaliana)		hypo	#N/A
Chr1	13336699	13336699	+	5.74139e-10	6.74298e-07	-25.5319	AT1G35870	transposable_element_gene,mRNA,exon;Chr1	gypsy-like retrotransposon family, has a 1.4e-152 P-value blast match to GB:AAD22153 polyprotein (Gypsy_Ty3-element) (Sorghum bicolor)		hypo	#N/A
Chr1	15427220	15427220	+	4.62966e-06	0.000952733	-25.5319	Chr1	transposable_element,transposon_fragment;			hypo	#N/A
Chr1	16079312	16079312	+	3.22623e-05	0.00442685	-25.5319	Chr1	transposable_element,transposon_fragment;			hypo	#N/A
Chr1	12018862	12018862	+	4.35366e-06	0.000906813	-25.5029	AT1G33135	transposable_element_gene,mRNA,exon;Chr1	similar to unknown protein [Arabidopsis thaliana] (TAIR:AT2G13320.1)		hypo	#N/A
Chr1	14482578	14482578	+	2.57899e-05	0.00370955	-25.4945	Chr1	transposable_element,transposon_fragment;			hypo	#N/A
Chr1	15536723	15536723	+	2.5721e-07	9.43573e-05	-25.4942	Chr1	transposable_element,transposon_fragment;			hypo	#N/A
Chr1	13902110	13902110	+	1.96903e-06	0.000480224	-25.4717	Chr1	transposable_element,transposon_fragment;			hypo	#N/A
Chr1	15074386	15074386	+	2.28737e-09	2.07337e-06	-25.4545	AT1G40101	transposable_element_gene,mRNA,exon;Chr1	gypsy-like retrotransposon family (Athila), has a 5.6e-152 P-value blast match to GB:CAA57397 Athila ORF 1 (Arabidopsis thaliana)		hypo	#N/A
Chr1	11308031	11308031	+	4.49209e-05	0.0057421	-25.4237	AT1G31570	transposable_element_gene,mRNA,exon;Chr1	CACTA-like transposase family (Tnp2/En/Spm), has a 0. P-value blast match to gb|AAG52024.1|AC022456_5 Tam1-homologous transposon protein TNP2, putative		hypo	#N/A
Chr1	15449977	15449977	+	1.00992e-05	0.00176486	-25.386	AT1G40630	transposable_element_gene,mRNA,exon;Chr1	gypsy-like retrotransposon family (Athila), has a 8.7e-230 P-value blast match to GB:CAA57397 Athila ORF 1 (Arabidopsis thaliana)		hypo	#N/A
Chr1	15785426	15785426	+	1.24164e-06	0.000332161	-25.3731	Chr1	transposable_element,transposon_fragment;			hypo	#N/A
Chr1	15597182	15597182	+	2.54993e-08	1.45872e-05	-25.2614	Chr1	transposable_element;			hypo	#N/A
Chr1	17530309	17530309	+	9.43689e-06	0.00167163	-25.2528	NONE				hypo	#N/A
Chr1	14222749	14222749	+	1.69988e-05	0.00266668	-25.2206	AT1G37340	transposable_element_gene,mRNA,exon;Chr1	gypsy-like retrotransposon family (Athila), has a 9.2e-199 P-value blast match to GB:CAA57397 Athila ORF 1 (Arabidopsis thaliana)		hypo	#N/A
Chr1	15453643	15453643	+	7.35852e-07	0.000218387	-25.1389	Chr1	transposable_element,transposon_fragment;			hypo	#N/A
Chr1	17028137	17028137	+	6.6367e-10	7.60104e-07	-25.1232	AT1G45020	transposable_element_gene,mRNA,exon;Chr1	copia-like retrotransposon family, has a 1.6e-248 P-value blast match to dbj|BAA78426.1| polyprotein (AtRE2-1) (Arabidopsis thaliana) (Ty1_Copia-element)		hypo	#N/A
Chr1	10144955	10144955	+	5.10882e-06	0.00102917	25.8788	NONE				hyper	#N/A
Chr1	10144954	10144954	+	8.24532e-05	0.00918784	26.177	NONE				hyper	#N/A
Chr1	13664548	13664548	+	7.25608e-06	0.0013576	28.2165	AT1G36305	transposable_element_gene,mRNA,exon;Chr1	gypsy-like retrotransposon family, has a 0. P-value blast match to GB:AAD27547 polyprotein (Gypsy_Ty3-element) (Oryza sativa subsp. indica)		hyper	#N/A
Chr1	26425907	26425907	+	7.87867e-05	0.00886709	30.4538	NONE				hyper	#N/A
Chr1	26185770	26185770	+	7.9316e-06	0.00145568	38.8046	NONE				hyper	#N/A
Chr1	15943480	15943480	+	7.16749e-05	0.00824183	42.6075	NONE				hyper	#N/A
Chr1	26185756	26185756	+	4.50376e-05	0.00575417	44.5883	NONE				hyper	#N/A
Chr1	9867509	9867509	+	9.32834e-07	0.000264304	44.9495	Chr1	transposable_element,transposon_fragment;			hyper	#N/A
Chr1	25160718	25160718	+	8.03069e-05	0.00900194	66.6667	AT1G67240	transposable_element_gene,mRNA,exon;Chr1	Mutator-like transposase family, has a 4.5e-23 P-value blast match to GB:AAA21566 mudrA of transposon=MuDR (MuDr-element) (Zea mays)		hyper	#N/A
Chr2	13717380	13717380	+	0	0	-73.6	AT2G32291	pseudogene,pseudogenic_transcript,pseudogenic_exon;	Pseudogene of AT2G31470	OK	hypo	OK
Chr2	13717418	13717418	+	2.27101e-11	4.67091e-08	-57.3152	AT2G32291	pseudogene,pseudogenic_transcript,pseudogenic_exon;	Pseudogene of AT2G31470	OK	hypo	OK
Chr2	13717343	13717343	+	6.67148e-06	0.00127104	-38.4615	AT2G32291	pseudogene,pseudogenic_transcript,pseudogenic_exon;	Pseudogene of AT2G31470	OK	hypo	OK
Chr2	4097980	4097980	+	5.31358e-05	0.00654238	-85.7143	Chr2	transposable_element,transposon_fragment;			hypo	#N/A
Chr2	3906925	3906925	+	4.36607e-06	0.000908911	-44.4444	Chr2	transposable_element,transposon_fragment;			hypo	#N/A
Chr2	15595843	15595843	+	2.97589e-06	0.00066936	-43.4783	Chr2	transposable_element,transposon_fragment;			hypo	#N/A
Chr2	1017657	1017657	+	6.58964e-05	0.00773334	-43.0622	Chr2	transposable_element,transposon_fragment;			hypo	#N/A
Chr2	17339544	17339544	+	9.68158e-08	4.30437e-05	-42.2253	Chr2	transposable_element,transposon_fragment;			hypo	#N/A
Chr2	1636512	1636512	+	6.83727e-05	0.00794935	-42.0998	Chr2	transposable_element,transposon_fragment;			hypo	#N/A
Chr2	534112	534112	+	1.20925e-05	0.00203565	-41.6667	AT2G02110	transposable_element_gene,mRNA,exon;Chr2	non-LTR retrotransposon family (LINE), has a 1.7e-36 P-value blast match to GB:AAA67727 reverse transcriptase (LINE-element) (Mus musculus)		hypo	#N/A
Chr2	5272596	5272596	+	7.95622e-05	0.00893544	-41.6667	AT2G12840	transposable_element_gene,mRNA,exon;Chr2	pseudogene, hypothetical protein		hypo	#N/A
Chr2	2300899	2300899	+	7.03828e-05	0.00812903	-40	Chr2	transposable_element,transposon_fragment;			hypo	#N/A
Chr2	5852860	5852860	+	8.20887e-09	5.83724e-06	-39.2857	AT2G13940	transposable_element_gene,mRNA,exon;Chr2	copia-like retrotransposon family, has a 4.4e-197 P-value blast match to GB:AAA57005 Hopscotch polyprotein (Ty1_Copia-element) (Zea mays)		hypo	#N/A
Chr2	1686860	1686860	+	1.93023e-06	0.000472964	-38.5373	NONE				hypo	#N/A
Chr2	2504920	2504920	+	3.4209e-05	0.00463443	-36.9048	NONE				hypo	#N/A
Chr2	3735553	3735553	+	1.69181e-05	0.0026558	-36.3636	AT2G09870	transposable_element_gene,mRNA,exon;Chr2	gypsy-like retrotransposon family (Athila), has a 5.6e-224 P-value blast match to GB:CAA57397 Athila ORF 1 (Arabidopsis thaliana)		hypo	#N/A
Chr2	2799490	2799490	+	4.09677e-05	0.00533976	-35.7143	Chr2	transposable_element,transposon_fragment;			hypo	#N/A
Chr2	1487578	1487578	+	2.38732e-06	0.000561455	-35.2485	AT2G04290	transposable_element_gene,mRNA,exon;Chr2	non-LTR retrotransposon family (LINE), has a 4.1e-36 P-value blast match to GB:NP_038607 L1 repeat, Tf subfamily, member 9 (LINE-element) (Mus musculus)		hypo	#N/A
Chr2	5809781	5809781	+	4.36757e-05	0.0056142	-34.4828	AT2G13860	transposable_element_gene,mRNA,exon;Chr2	gypsy-like retrotransposon family, has a 2.4e-275 P-value blast match to GB:AAD27547 polyprotein (Gypsy_Ty3-element) (Oryza sativa subsp. indica)		hypo	#N/A
Chr2	15595836	15595836	+	5.35687e-06	0.00106835	-34.375	Chr2	transposable_element,transposon_fragment;			hypo	#N/A
Chr2	5620755	5620755	+	4.98874e-05	0.00623177	-34.127	AT2G13470	transposable_element_gene,mRNA,exon;Chr2	non-LTR retrotransposon family (LINE), has a 3.6e-14 P-value blast match to GB:NP_038602 L1 repeat, Tf subfamily, member 18 (LINE-element) (Mus musculus)		hypo	#N/A
Chr2	6268668	6268668	+	6.92205e-07	0.000207531	-33.371	AT2G14650	transposable_element_gene,mRNA,exon;Chr2	gypsy-like retrotransposon family, has a 1.6e-311 P-value blast match to GB:AAD27547 polyprotein (Gypsy_Ty3-element) (Oryza sativa subsp. indica)		hypo	#N/A
Chr2	4009050	4009050	+	4.32657e-05	0.00557482	-33.3333	AT2G10430	pseudogene,pseudogenic_transcript,pseudogenic_exon;	pseudogene, similar to putative reverse transcriptase, blastp match of 34% identity and 1.6e-24 P-value to GP|27311287|gb|AAO00713.1||AC078894 putative reverse transcriptase {Oryza sativa (japonica cultivar-group)}		hypo	#N/A
Chr2	4954029	4954029	+	8.84324e-09	6.19739e-06	-32.7869	AT2G12330	transposable_element_gene,mRNA,exon;Chr2	gypsy-like retrotransposon family (Athila), has a 3.1e-219 P-value blast match to GB:CAA57397 Athila ORF 1 (Arabidopsis thaliana)		hypo	#N/A
Chr2	15478684	15478684	+	6.19945e-05	0.00737727	-32.6961	NONE				hypo	#N/A
Chr2	7018010	7018010	+	1.08484e-07	4.71973e-05	-32.5746	AT2G16180	transposable_element_gene,mRNA,exon;Chr2	pseudogene, Ulp1 protease family, contains Pfam profile PF02902: Ulp1 protease family, C-terminal catalytic domain		hypo	#N/A
Chr2	3603779	3603779	+	1.27833e-05	0.00212627	-32.4665	NONE				hypo	#N/A
Chr2	6525767	6525767	+	6.81874e-08	3.23051e-05	-32.1429	AT2G15060	transposable_element_gene,mRNA,exon;Chr2	CACTA-like transposase family (Tnp1/En/Spm), has a 1.8e-63 P-value blast match to ref|NP_189784.1| TNP1-related protein (Arabidopsis thaliana) (CACTA-element)		hypo	#N/A
Chr2	4008141	4008141	+	1.09637e-07	4.76396e-05	-31.7949	AT2G10420	transposable_element_gene,mRNA,exon;Chr2	CACTA-like transposase family (Tnp2/En/Spm), has a 1.7e-82 P-value blast match to gb|AAG52024.1|AC022456_5 Tam1-homologous transposon protein TNP2, putative		hypo	#N/A
Chr2	5882160	5882160	+	6.84638e-06	0.00129685	-31.5789	Chr2	transposable_element,transposon_fragment;			hypo	#N/A
Chr2	6003150	6003150	+	1.0726e-05	0.00185135	-31.3725	Chr2	transposable_element,transposon_fragment;			hypo	#N/A
Chr2	2277832	2277832	+	2.24096e-05	0.00332181	-31.25	AT2G05930	transposable_element_gene,mRNA,exon;Chr2	copia-like retrotransposon family, has a 0. P-value blast match to gb|AAG52949.1| gag/pol polyprotein (Endovir1-1) (Arabidopsis thaliana) (Ty1_Copia-family)		hypo	#N/A
Chr2	4780012	4780012	+	2.31309e-05	0.00340736	-31.25	Chr2	transposable_element,transposon_fragment;			hypo	#N/A
Chr2	5628725	5628725	+	1.26396e-10	1.94684e-07	-30.8934	AT2G13500	gene,mRNA,protein;	unknown protein		hypo	#N/A
Chr2	18972583	18972583	+	2.70841e-08	1.53085e-05	-30.8824	AT2G46190	gene,mRNA,protein;			hypo	#N/A
Chr2	2052928	2052928	+	2.78657e-05	0.00394203	-30.1834	AT2G05570	transposable_element_gene,mRNA,exon;Chr2	Mutator-like transposase family, has a 4.8e-75 P-value blast match to O65231 /281-442 Pfam PF03108 MuDR family transposase (MuDr-element domain)		hypo	#N/A
Chr2	18651491	18651491	+	1.67148e-08	1.03632e-05	-30.1693	AT2G45230	transposable_element_gene,mRNA,exon;			hypo	#N/A
Chr2	2465913	2465913	+	2.06391e-05	0.00310883	-30	Chr2	transposable_element,transposon_fragment;			hypo	#N/A
Chr2	4011234	4011234	+	6.46982e-10	7.45618e-07	-30	AT2G10430	pseudogene,pseudogenic_transcript,pseudogenic_exon;	pseudogene, similar to putative reverse transcriptase, blastp match of 34% identity and 1.6e-24 P-value to GP|27311287|gb|AAO00713.1||AC078894 putative reverse transcriptase {Oryza sativa (japonica cultivar-group)}		hypo	#N/A
Chr2	6974013	6974013	+	6.59136e-05	0.00773512	-30	AT2G16030	gene,mRNA,three_prime_UTR,exon;	S-adenosyl-L-methionine-dependent methyltransferases superfamily protein		hypo	#N/A
Chr2	13223680	13223680	+	1.38704e-05	0.00226855	-29.8377	AT2G31080	transposable_element_gene,mRNA,exon;Chr2	non-LTR retrotransposon family (LINE), has a 1.3e-49 P-value blast match to GB:NP_038603 L1 repeat, Tf subfamily, member 23 (LINE-element) (Mus musculus)		hypo	#N/A
Chr2	4414565	4414565	+	5.50619e-05	0.0067238	-29.7619	Chr2	transposable_element,transposon_fragment;			hypo	#N/A
Chr2	5599124	5599124	+	5.65347e-08	2.7758e-05	-29.5238	AT2G13450	gene,mRNA,protein,CDS,exon;	unknown protein		hypo	#N/A
Chr2	3492283	3492283	+	1.85444e-06	0.000458303	-29.1667	NONE				hypo	#N/A
Chr2	6115509	6115509	+	7.03173e-05	0.00812308	-29.0323	AT2G14400	transposable_element_gene,mRNA,exon;Chr2	gypsy-like retrotransposon family, has a 5.4e-191 P-value blast match to GB:BAA84458 GAG-POL precursor (gypsy_Ty3-element) (Oryza sativa)gi|5902445|dbj|BAA84458.1| GAG-POL precursor (Oryza sativa (japonica cultivar-group)) (RIRE2) (Gypsy_Ty3-family)		hypo	#N/A
Chr2	4007928	4007928	+	2.48107e-05	0.00360064	-28.9736	Chr2	transposable_element;			hypo	#N/A
Chr2	4008098	4008098	+	1.4762e-06	0.000382044	-28.8136	AT2G10420	transposable_element_gene,mRNA,exon;Chr2	CACTA-like transposase family (Tnp2/En/Spm), has a 1.7e-82 P-value blast match to gb|AAG52024.1|AC022456_5 Tam1-homologous transposon protein TNP2, putative		hypo	#N/A
Chr2	6881709	6881709	+	1.93959e-08	1.17012e-05	-28.6655	AT2G15800	transposable_element_gene,mRNA,exon;Chr2	transposable_element_gene		hypo	#N/A
Chr2	7234217	7234217	+	3.0565e-10	4.03597e-07	-28.6566	AT2G16680	transposable_element_gene,mRNA,exon;Chr2	non-LTR retrotransposon family (LINE), has a 5.0e-35 P-value blast match to GB:NP_038605 L1 repeat, Tf subfamily, member 30 (LINE-element) (Mus musculus)		hypo	#N/A
Chr2	3872804	3872804	+	2.57245e-05	0.00370249	-28.6272	Chr2	transposable_element,transposon_fragment;			hypo	#N/A
Chr2	18497861	18497861	+	8.95783e-05	0.00979971	-28.5714	NONE				hypo	#N/A
Chr2	2483181	2483181	+	2.7142e-05	0.00386276	-28.5544	AT2G06290	transposable_element_gene,mRNA,exon;	non-LTR retrotransposon family (LINE), has a 1.2e-30 P-value blast match to GB:AAA39398 ORF2 (Mus musculus) (LINE-element)		hypo	#N/A
Chr2	1632626	1632626	+	4.34266e-08	2.24359e-05	-28.3875	AT2G04670	transposable_element_gene,mRNA,exon;Chr2	gypsy-like retrotransposon family, has a 1.2e-313 P-value blast match to GB:AAD27547 polyprotein (Gypsy_Ty3-element) (Oryza sativa subsp. indica)		hypo	#N/A
Chr2	9529483	9529483	+	1.47945e-06	0.000382783	-28.2037	AT2G22440	gene,mRNA,protein,exon,CDS;	BEST Arabidopsis thaliana protein match is: Ribonuclease H-like superfamily protein (TAIR:AT4G29090.1)		hypo	#N/A
Chr2	4007825	4007825	+	1.61438e-06	0.000410354	-28.1328	Chr2	transposable_element;			hypo	#N/A
Chr2	10593971	10593971	+	3.6586e-06	0.000790013	-28.125	AT2G24890	transposable_element_gene,mRNA,exon;Chr2	Mutator-like transposase family, has a 4.7e-61 P-value blast match to O22273 /233-373 Pfam PF03108 MuDR family transposase (MuDr-element domain)		hypo	#N/A
Chr2	5043667	5043667	+	3.23697e-06	0.000715343	-27.8674	AT2G12450	transposable_element_gene,mRNA,exon;Chr2	gypsy-like retrotransposon family, has a 1.7e-96 P-value blast match to GB:AAD11615 prpol (gypsy_Ty3-element) (Zea mays)		hypo	#N/A
Chr2	1835939	1835939	+	4.50761e-05	0.00575719	-27.7778	NONE				hypo	#N/A
Chr2	3975432	3975432	+	1.28332e-05	0.00213293	-27.7778	AT2G10320	transposable_element_gene,mRNA,exon;Chr2	gypsy-like retrotransposon family (Athila), has a 2.3e-75 P-value blast match to GB:CAA57397 Athila ORF 1 (Arabidopsis thaliana)		hypo	#N/A
Chr2	6092653	6092653	+	7.45176e-06	0.00138618	-27.7778	NONE				hypo	#N/A
Chr2	6548676	6548676	+	5.59949e-05	0.00681069	-27.7445	NONE				hypo	#N/A
Chr2	4121586	4121586	+	6.30816e-07	0.000192733	-27.6991	Chr2	transposable_element,transposon_fragment;			hypo	#N/A
Chr2	5905060	5905060	+	4.92464e-06	0.00100006	-27.6647	Chr2	transposable_element,transposon_fragment;			hypo	#N/A
Chr2	6459023	6459023	+	3.42917e-09	2.87945e-06	-27.6316	AT2G14970	transposable_element_gene,mRNA,exon;Chr2	CACTA-like transposase family (Tnp1/En/Spm), has a 0. P-value blast match to ref|NP_189784.1| TNP1-related protein (Arabidopsis thaliana) (CACTA-element)		hypo	#N/A
Chr2	7237585	7237585	+	7.01942e-06	0.00132257	-27.6136	AT2G16690	transposable_element_gene,mRNA,exon;Chr2	similar to unknown protein [Arabidopsis thaliana] (TAIR:AT2G41570.1)		hypo	#N/A
Chr2	4985018	4985018	+	7.5453e-07	0.000222975	-27.5569	AT2G12370	transposable_element_gene,mRNA,exon;Chr2	gypsy-like retrotransposon family, has a 9.3e-204 P-value blast match to GB:AAD19359 polyprotein (gypsy_Ty3-element) (Sorghum bicolor)		hypo	#N/A
Chr2	6269041	6269041	+	4.12963e-09	3.34797e-06	-27.5344	AT2G14650	transposable_element_gene,mRNA,exon;Chr2	gypsy-like retrotransposon family, has a 1.6e-311 P-value blast match to GB:AAD27547 polyprotein (Gypsy_Ty3-element) (Oryza sativa subsp. indica)		hypo	#N/A
Chr2	5032852	5032852	+	9.47334e-06	0.00167635	-27.5224	Chr2	transposable_element,transposon_fragment;			hypo	#N/A
Chr2	4777953	4777953	+	1.90137e-08	1.15159e-05	-27.5075	AT2G11840	transposable_element_gene,mRNA,exon;Chr2	gypsy-like retrotransposon family (Athila), has a 5.2e-173 P-value blast match to GB:CAA57397 Athila ORF 1 (Arabidopsis thaliana)		hypo	#N/A
Chr2	6701016	6701016	+	7.66054e-15	5.65692e-11	-27.4396	AT2G15380	transposable_element_gene,mRNA,exon;Chr2	non-LTR retrotransposon family (LINE), has a 1.1e-29 P-value blast match to GB:NP_038603 L1 repeat, Tf subfamily, member 23 (LINE-element) (Mus musculus)		hypo	#N/A
Chr2	5785662	5785662	+	3.52991e-09	2.9481e-06	-27.4091	AT2G13830	transposable_element_gene,mRNA,exon;Chr2	gypsy-like retrotransposon family, has a 4.4e-283 P-value blast match to GB:AAD22153 polyprotein (Gypsy_Ty3-element) (Sorghum bicolor)		hypo	#N/A
Chr2	533977	533977	+	6.13554e-09	4.6e-06	-27.3951	AT2G02110	transposable_element_gene,mRNA,exon;Chr2	non-LTR retrotransposon family (LINE), has a 1.7e-36 P-value blast match to GB:AAA67727 reverse transcriptase (LINE-element) (Mus musculus)		hypo	#N/A
Chr2	7232249	7232249	+	2.03545e-07	7.81303e-05	-27.3821	NONE				hypo	#N/A
Chr2	8997734	8997734	+	3.46512e-12	9.82e-09	-27.3802	NONE				hypo	#N/A
Chr2	14409870	14409870	+	1.30907e-08	8.52524e-06	-27.2669	AT2G34100	gene,mRNA;AT2G34130	transposable_element,transposon_fragment;		hypo	#N/A
Chr2	5599481	5599481	+	1.59419e-05	0.00253401	-27.2659	AT2G13450	gene,mRNA,protein,CDS,exon;	unknown protein		hypo	#N/A
Chr2	824767	824767	+	6.69526e-07	0.000202107	-27.1186	NONE				hypo	#N/A
Chr2	6178137	6178137	+	2.23899e-06	0.000532236	-27.0789	Chr2	transposable_element,transposon_fragment;			hypo	#N/A
Chr2	5786455	5786455	+	1.61967e-06	0.00041151	-27.0089	AT2G13830	transposable_element_gene,mRNA,exon;Chr2	gypsy-like retrotransposon family, has a 4.4e-283 P-value blast match to GB:AAD22153 polyprotein (Gypsy_Ty3-element) (Sorghum bicolor)		hypo	#N/A
Chr2	8997396	8997396	+	2.00489e-05	0.00304013	-26.9624	NONE				hypo	#N/A
Chr2	4560855	4560855	+	2.47895e-08	1.42908e-05	-26.9535	AT2G11430	transposable_element_gene,mRNA,exon;Chr2	gypsy-like retrotransposon family, has a 0. P-value blast match to GB:AAD27547 polyprotein (Gypsy_Ty3-element) (Oryza sativa subsp. indica)		hypo	#N/A
Chr2	14411198	14411198	+	4.26132e-07	0.000140807	-26.9022	AT2G34100	gene,mRNA;AT2G34130	transposable_element,transposon_fragment;		hypo	#N/A
Chr2	7230884	7230884	+	8.27116e-14	4.18072e-10	-26.8917	AT2G16676	gene,mRNA,protein,CDS,exon;	unknown protein		hypo	#N/A
Chr2	6255994	6255994	+	5.28639e-05	0.00651553	-26.7895	Chr2	transposable_element,transposon_fragment;			hypo	#N/A
Chr2	6845965	6845965	+	1.99094e-06	0.000484622	-26.7857	AT2G15720	transposable_element_gene,mRNA,exon;Chr2	non-LTR retrotransposon family (LINE), has a 5.4e-35 P-value blast match to GB:AAB41224 ORF2 (LINE-element) (Rattus norvegicus)		hypo	#N/A
Chr2	2477313	2477313	+	2.44393e-12	7.35617e-09	-26.7161	AT2G06290	transposable_element_gene,mRNA,exon;	non-LTR retrotransposon family (LINE), has a 1.2e-30 P-value blast match to GB:AAA39398 ORF2 (Mus musculus) (LINE-element)		hypo	#N/A
Chr2	4729063	4729063	+	2.95322e-05	0.00412792	-26.6846	Chr2	transposable_element,transposon_fragment;			hypo	#N/A
Chr2	2451155	2451155	+	3.40132e-08	1.84297e-05	-26.6615	Chr2	transposable_element,transposon_fragment;			hypo	#N/A
Chr2	5332710	5332710	+	1.41142e-05	0.00230046	-26.5306	AT2G12970	transposable_element_gene,mRNA,exon;Chr2	gypsy-like retrotransposon family, has a 6.2e-259 P-value blast match to GB:CAA73042 polyprotein (Gypsy_Ty3-element) (Ananas comosus)		hypo	#N/A
Chr2	6766709	6766709	+	1.14703e-06	0.000311514	-26.4833	AT2G15510	transposable_element_gene,mRNA,exon;Chr2	non-LTR retrotransposon family (LINE), has a 3.0e-20 P-value blast match to GB:NP_038602 L1 repeat, Tf subfamily, member 18 (LINE-element) (Mus musculus)		hypo	#N/A
Chr2	3730569	3730569	+	2.61748e-05	0.00375386	-26.4706	AT2G09865	transposable_element_gene,mRNA;Chr2	similar to unknown protein [Arabidopsis thaliana] (TAIR:AT1G38380.1)		hypo	#N/A
Chr2	6082659	6082659	+	6.35458e-05	0.00751675	-26.4706	NONE				hypo	#N/A
Chr2	17675973	17675973	+	2.67838e-05	0.00382174	-26.3942	NONE				hypo	#N/A
Chr2	18594523	18594523	+	1.68757e-05	0.00265098	-26.3158	AT2G45090	pseudogene,pseudogenic_transcript,pseudogenic_exon;			hypo	#N/A
Chr2	6264813	6264813	+	1.11594e-05	0.00190974	-26.2042	Chr2	transposable_element,transposon_fragment;			hypo	#N/A
Chr2	3680960	3680960	+	1.43279e-08	9.16014e-06	-26.0274	Chr2	transposable_element,transposon_fragment;			hypo	#N/A
Chr2	6772227	6772227	+	4.66105e-12	1.26454e-08	-25.7516	AT2G15520	transposable_element_gene,mRNA,exon;Chr2	similar to zinc finger protein, putative [Arabidopsis thaliana] (TAIR:AT3G24680.1)		hypo	#N/A
Chr2	2010651	2010651	+	2.69365e-07	9.79727e-05	-25.7036	Chr2	transposable_element,transposon_fragment;			hypo	#N/A
Chr2	1820685	1820685	+	1.20677e-07	5.14967e-05	-25.6622	AT2G05090	transposable_element_gene,mRNA,exon;Chr2	similar to unknown protein [Arabidopsis thaliana] (TAIR:AT5G37080.1)		hypo	#N/A
Chr2	7235610	7235610	+	1.31344e-05	0.00217162	-25.5864	AT2G16680	transposable_element_gene,mRNA,exon;Chr2	non-LTR retrotransposon family (LINE), has a 5.0e-35 P-value blast match to GB:NP_038605 L1 repeat, Tf subfamily, member 30 (LINE-element) (Mus musculus)		hypo	#N/A
Chr2	4171135	4171135	+	3.68711e-07	0.000125657	-25.3418	AT2G10650	transposable_element_gene,mRNA,exon;Chr2	gypsy-like retrotransposon family (Athila), has a 3.5e-43 P-value blast match to GB:CAA57397 Athila ORF 1 (Arabidopsis thaliana)		hypo	#N/A
Chr2	6886421	6886421	+	1.22977e-08	8.11101e-06	-25.3158	AT2G15810	transposable_element_gene,mRNA,exon;	Mutator-like transposase family, has a 1.5e-12 P-value blast match to GB:AAA21566 mudrA of transposon=MuDR (MuDr-element) (Zea mays)		hypo	#N/A
Chr2	7230814	7230814	+	2.29466e-05	0.00338549	-25.1807	AT2G16676	gene,mRNA,three_prime_UTR,exon;	unknown protein		hypo	#N/A
Chr2	5991799	5991799	+	3.58345e-06	0.000776163	-25.1401	AT2G14180	transposable_element_gene,mRNA,exon;Chr2	gypsy-like retrotransposon family (Athila), has a 3.3e-307 P-value blast match to GB:CAA57397 Athila ORF 1 (Arabidopsis thaliana)		hypo	#N/A
Chr2	6151345	6151345	+	7.56453e-05	0.00859288	26.3158	AT2G14450	transposable_element_gene,mRNA,exon;Chr2	similar to unknown protein [Arabidopsis thaliana] (TAIR:AT1G35920.1)		hyper	#N/A
Chr2	6259065	6259065	+	9.1873e-05	0.00999631	27.9927	AT2G14640	transposable_element_gene,mRNA,exon;Chr2	gypsy-like retrotransposon family, has a 2.5e-119 P-value blast match to GB:AAD27547 polyprotein (Gypsy_Ty3-element) (Oryza sativa subsp. indica)		hyper	#N/A
Chr2	9432117	9432117	+	4.42357e-09	3.5343e-06	36.9528	NONE				hyper	#N/A
Chr2	6253596	6253596	+	8.08479e-05	0.00904765	39.1304	Chr2	transposable_element,transposon_fragment;			hyper	#N/A
Chr2	17094358	17094358	+	2.51796e-05	0.00364029	42.1245	AT2G40955	gene,mRNA,protein,exon,CDS;			hyper	#N/A
Chr2	9432127	9432127	+	1.8956e-10	2.73909e-07	51.0526	NONE				hyper	#N/A
Chr3	8654410	8654410	+	7.81328e-07	0.000229218	-47.7546	NONE				hypo	OK
Chr3	14702404	14702404	+	2.62372e-05	0.00376037	-25.4545	AT3G42621	transposable_element_gene,mRNA,exon;Chr3		OK	hypo	#N/A
Chr3	13435818	13435818	+	2.75838e-05	0.00391243	-47.619	Chr3	transposable_element,transposon_fragment;			hypo	#N/A
Chr3	13772428	13772428	+	7.31858e-07	0.000217368	-46.4286	NONE				hypo	#N/A
Chr3	16173547	16173547	+	6.27127e-05	0.00743953	-43.3333	NONE				hypo	#N/A
Chr3	17176732	17176732	+	4.4351e-05	0.00568433	-42.8571	NONE				hypo	#N/A
Chr3	8654387	8654387	+	4.34715e-05	0.00559538	-42.5926	NONE				hypo	#N/A
Chr3	17176722	17176722	+	4.39985e-06	0.00091496	-41.3793	NONE				hypo	#N/A
Chr3	11548029	11548029	+	5.88239e-05	0.00707665	-40.9091	AT3G29710	transposable_element_gene,mRNA;Chr3			hypo	#N/A
Chr3	18654596	18654596	+	2.9906e-06	0.000671877	-40.625	AT3G50320	gene,mRNA,protein,CDS,exon;			hypo	#N/A
Chr3	12962921	12962921	+	1.18077e-06	0.000318979	-40.3846	AT3G31970	transposable_element_gene,mRNA,exon;Chr3			hypo	#N/A
Chr3	12175892	12175892	+	4.5848e-05	0.00583558	-39.2857	AT3G30585	transposable_element_gene,mRNA,exon;Chr3			hypo	#N/A
Chr3	13807559	13807559	+	8.08479e-05	0.00904765	-39.1304	Chr3	transposable_element,transposon_fragment;			hypo	#N/A
Chr3	1967049	1967049	+	8.38327e-05	0.00930666	-38.5808	NONE				hypo	#N/A
Chr3	15543424	15543424	+	3.56152e-05	0.00478459	-36.3636	AT3G43635	transposable_element_gene,mRNA,exon;Chr3			hypo	#N/A
Chr3	16593554	16593554	+	1.14317e-05	0.00194633	-35.4592	AT3G45253	transposable_element_gene,mRNA,exon;Chr3			hypo	#N/A
Chr3	11060147	11060147	+	1.92429e-07	7.47588e-05	-35.3347	AT3G29076	transposable_element_gene,mRNA,exon;Chr3			hypo	#N/A
Chr3	12988200	12988200	+	5.58514e-05	0.00679687	-34.2105	Chr3	transposable_element,transposon_fragment;			hypo	#N/A
Chr3	15724517	15724517	+	2.02055e-07	7.77122e-05	-33.8928	AT3G43867	transposable_element_gene,mRNA,exon;Chr3			hypo	#N/A
Chr3	4931390	4931390	+	3.84631e-06	0.000822165	-33.4193	Chr3	transposable_element,transposon_fragment;			hypo	#N/A
Chr3	19739903	19739903	+	1.1612e-05	0.00197042	-33.3623	Chr3	transposable_element,transposon_fragment;			hypo	#N/A
Chr3	11147704	11147704	+	3.43999e-05	0.00465476	-32.2581	NONE				hypo	#N/A
Chr3	8846946	8846946	+	8.1087e-06	0.00148277	-31.8182	AT3G24365	transposable_element_gene,mRNA,exon;Chr3			hypo	#N/A
Chr3	15585794	15585794	+	2.39656e-05	0.00350344	-31.5789	AT3G43684	transposable_element_gene,mRNA,exon;Chr3			hypo	#N/A
Chr3	17394882	17394882	+	8.0913e-08	3.71537e-05	-31.5068	AT3G47240	transposable_element_gene,mRNA;Chr3			hypo	#N/A
Chr3	14071365	14071365	+	5.00984e-07	0.000160027	-31.1411	Chr3	transposable_element,transposon_fragment;			hypo	#N/A
Chr3	9621378	9621378	+	8.0598e-07	0.000235008	-31.14	AT3G26265	transposable_element_gene,mRNA,exon;Chr3			hypo	#N/A
Chr3	15400277	15400277	+	1.49382e-07	6.11159e-05	-31.0345	AT3G43500	gene,mRNA,protein,CDS,exon;			hypo	#N/A
Chr3	15261802	15261802	+	3.36886e-05	0.00458138	-30.9524	Chr3	transposable_element,transposon_fragment;			hypo	#N/A
Chr3	11060119	11060119	+	2.48889e-06	0.00058036	-30.7733	AT3G29076	transposable_element_gene,mRNA,exon;Chr3			hypo	#N/A
Chr3	13102086	13102086	+	3.61817e-06	0.000782676	-30.6122	AT3G32110	transposable_element_gene,mRNA,exon;Chr3			hypo	#N/A
Chr3	11322150	11322150	+	5.62251e-05	0.00683334	-30.5556	NONE				hypo	#N/A
Chr3	14066708	14066708	+	6.76441e-05	0.00788617	-30.5556	Chr3	transposable_element,transposon_fragment;			hypo	#N/A
Chr3	13427598	13427598	+	9.87412e-07	0.000276814	-30.537	Chr3	transposable_element,transposon_fragment;			hypo	#N/A
Chr3	11709285	11709285	+	2.46415e-05	0.00358266	-30.5173	AT3G29796	gene,mRNA,protein;Chr3			hypo	#N/A
Chr3	4277180	4277180	+	8.16051e-08	3.74271e-05	-30.5	AT3G13250	transposable_element_gene,mRNA,exon;Chr3			hypo	#N/A
Chr3	16881491	16881491	+	2.65122e-06	0.000610538	-30.486	Chr3	transposable_element,transposon_fragment;			hypo	#N/A
Chr3	14795680	14795680	+	1.67925e-07	6.71018e-05	-30.1587	Chr3	transposable_element,transposon_fragment;			hypo	#N/A
Chr3	17431428	17431428	+	7.70614e-05	0.0087139	-30	AT3G47310	transposable_element_gene,mRNA,exon;Chr3			hypo	#N/A
Chr3	12115485	12115485	+	5.72266e-05	0.00692985	-29.7297	AT3G30490	transposable_element_gene,mRNA,exon;Chr3			hypo	#N/A
Chr3	15597313	15597313	+	2.71697e-08	1.53502e-05	-29.4433	AT3G43688	transposable_element_gene,mRNA,exon;Chr3			hypo	#N/A
Chr3	15175323	15175323	+	2.54826e-06	0.000591536	-29.3333	AT3G43175	transposable_element_gene,mRNA,exon;Chr3			hypo	#N/A
Chr3	11541654	11541654	+	4.47692e-05	0.0057278	-29.2717	Chr3	transposable_element,transposon_fragment;			hypo	#N/A
Chr3	13621388	13621388	+	7.85874e-05	0.00884903	-29.1667	Chr3	transposable_element,transposon_fragment;			hypo	#N/A
Chr3	20260148	20260148	+	4.16013e-09	3.36506e-06	-29.1018	AT3G54730	gene,mRNA,protein,exon,CDS,three_prime_UTR;			hypo	#N/A
Chr3	1557754	1557754	+	3.10862e-15	2.5372e-11	-29.0608	AT3G05410	gene,mRNA,protein;AT3G05415	transposable_element,transposon_fragment;		hypo	#N/A
Chr3	15543410	15543410	+	3.42025e-05	0.00463419	-29.0323	AT3G43635	transposable_element_gene,mRNA,exon;Chr3			hypo	#N/A
Chr3	23205703	23205703	+	1.00934e-08	6.90865e-06	-28.7879	AT3G62725	transposable_element_gene,mRNA,exon;Chr3			hypo	#N/A
Chr3	11882152	11882152	+	3.61882e-09	3.00678e-06	-28.6488	NONE				hypo	#N/A
Chr3	13410906	13410906	+	3.33761e-05	0.00454749	-28.585	Chr3	transposable_element,transposon_fragment;			hypo	#N/A
Chr3	12133139	12133139	+	5.25828e-07	0.000166413	-28.5714	Chr3	transposable_element,transposon_fragment;			hypo	#N/A
Chr3	20727683	20727683	+	1.14449e-05	0.00194828	-28.5714	AT3G55860	gene,mRNA,three_prime_UTR,exon;			hypo	#N/A
Chr3	13398250	13398250	+	7.61374e-05	0.00863384	-28.2609	AT3G32475	transposable_element_gene,mRNA,exon;Chr3			hypo	#N/A
Chr3	17437048	17437048	+	9.07892e-05	0.00990038	-28.1416	Chr3	transposable_element,transposon_fragment;			hypo	#N/A
Chr3	11334074	11334074	+	5.1332e-09	3.98412e-06	-28.1268	Chr3	transposable_element,transposon_fragment;			hypo	#N/A
Chr3	12533914	12533914	+	2.94982e-07	0.000105319	-28.0702	AT3G30825	transposable_element_gene,mRNA,exon;Chr3			hypo	#N/A
Chr3	13126658	13126658	+	6.34431e-07	0.000193562	-28.0702	NONE				hypo	#N/A
Chr3	13873290	13873290	+	6.44267e-10	7.43594e-07	-28	AT3G33106	transposable_element_gene,mRNA,exon;Chr3			hypo	#N/A
Chr3	12499368	12499368	+	1.64244e-09	1.58435e-06	-27.7228	AT3G30811	transposable_element_gene,mRNA,exon;Chr3			hypo	#N/A
Chr3	13805370	13805370	+	4.95994e-05	0.0062043	-27.6224	AT3G33069	transposable_element_gene,mRNA,exon;Chr3			hypo	#N/A
Chr3	15461482	15461482	+	2.64848e-06	0.000609943	-27.6179	Chr3	transposable_element,transposon_fragment;			hypo	#N/A
Chr3	14788350	14788350	+	9.00474e-05	0.00983827	-27.4621	Chr3	transposable_element,transposon_fragment;			hypo	#N/A
Chr3	10343755	10343755	+	2.95042e-10	3.91747e-07	-27.4242	AT3G27883	transposable_element_gene,mRNA,exon;Chr3			hypo	#N/A
Chr3	10885968	10885968	+	4.18518e-05	0.00542805	-27.3805	AT3G28865	transposable_element_gene,mRNA,exon;			hypo	#N/A
Chr3	13102073	13102073	+	5.14892e-05	0.00638017	-27.2727	AT3G32110	transposable_element_gene,mRNA,exon;Chr3			hypo	#N/A
Chr3	12103675	12103675	+	2.27147e-05	0.00335805	-27.2298	Chr3	transposable_element,transposon_fragment;			hypo	#N/A
Chr3	12501554	12501554	+	4.51544e-08	2.31741e-05	-27.1429	Chr3	transposable_element,transposon_fragment;			hypo	#N/A
Chr3	10931607	10931607	+	7.68469e-05	0.00869522	-27.0833	Chr3	transposable_element,transposon_fragment;			hypo	#N/A
Chr3	11688369	11688369	+	8.11838e-08	3.72559e-05	-27.027	AT3G29782	transposable_element_gene,mRNA,exon;Chr3			hypo	#N/A
Chr3	13782218	13782218	+	8.55338e-05	0.00945976	-27.027	NONE				hypo	#N/A
Chr3	14267814	14267814	+	7.31051e-06	0.00136567	-26.9231	AT3G42086	transposable_element_gene,mRNA,exon;Chr3			hypo	#N/A
Chr3	21324649	21324649	+	8.38011e-05	0.0093045	-26.8293	AT3G57586	transposable_element_gene,mRNA,exon;Chr3			hypo	#N/A
Chr3	16957768	16957768	+	2.34917e-05	0.00344976	-26.7742	AT3G46183	transposable_element_gene,mRNA,exon;Chr3			hypo	#N/A
Chr3	18794962	18794962	+	2.76379e-06	0.000631249	-26.6703	AT3G50625	transposable_element_gene,mRNA,exon;Chr3			hypo	#N/A
Chr3	12479607	12479607	+	8.7666e-05	0.0096392	-26.5913	AT3G30802	transposable_element_gene,mRNA,exon;Chr3			hypo	#N/A
Chr3	10919113	10919113	+	7.02434e-11	1.18711e-07	-26.5906	AT3G28915	transposable_element_gene,mRNA,exon;Chr3			hypo	#N/A
Chr3	12500649	12500649	+	1.65319e-10	2.44159e-07	-26.5487	Chr3	transposable_element,transposon_fragment;			hypo	#N/A
Chr3	20728523	20728523	+	2.27402e-05	0.00336156	-26.5306	AT3G55860	gene,mRNA,protein;			hypo	#N/A
Chr3	14718220	14718220	+	2.34889e-05	0.00344975	-26.4405	AT3G42626	transposable_element_gene,mRNA,exon;Chr3			hypo	#N/A
Chr3	12233025	12233025	+	4.83153e-05	0.00608253	-26.4347	Chr3	transposable_element,transposon_fragment;			hypo	#N/A
Chr3	9619801	9619801	+	5.53184e-05	0.00674492	-26.409	Chr3	transposable_element,transposon_fragment;			hypo	#N/A
Chr3	16437778	16437778	+	2.55656e-09	2.27274e-06	-26.3736	Chr3	transposable_element,transposon_fragment;			hypo	#N/A
Chr3	13623760	13623760	+	4.0633e-06	0.000859589	-26.3607	Chr3	transposable_element,transposon_fragment;			hypo	#N/A
Chr3	11636147	11636147	+	1.15744e-09	1.19056e-06	-26.3474	AT3G29769	transposable_element_gene,mRNA,exon;Chr3			hypo	#N/A
Chr3	8132945	8132945	+	1.00582e-07	4.43921e-05	-26.3009	NONE				hypo	#N/A
Chr3	9693141	9693141	+	4.85466e-09	3.80834e-06	-26.203	AT3G26483	transposable_element_gene,mRNA,exon;Chr3			hypo	#N/A
Chr3	12214086	12214086	+	9.77529e-06	0.0017187	-26.1905	Chr3	transposable_element,transposon_fragment;			hypo	#N/A
Chr3	9694359	9694359	+	3.58616e-06	0.000776706	-26.0585	AT3G26483	transposable_element_gene,mRNA,exon;Chr3			hypo	#N/A
Chr3	15271078	15271078	+	4.53151e-06	0.000936662	-26.0563	Chr3	transposable_element,transposon_fragment;			hypo	#N/A
Chr3	15364529	15364529	+	8.03327e-05	0.00900371	-26.0551	AT3G43436	transposable_element_gene,mRNA,exon;Chr3			hypo	#N/A
Chr3	9392591	9392591	+	1.0402e-08	7.07516e-06	-25.9596	AT3G25725	transposable_element_gene,mRNA,exon;Chr3			hypo	#N/A
Chr3	15596475	15596475	+	4.65957e-06	0.000957567	-25.8687	AT3G43688	transposable_element_gene,mRNA,exon;Chr3			hypo	#N/A
Chr3	14557914	14557914	+	1.53233e-08	9.65327e-06	-25.8401	AT3G42432	transposable_element_gene,mRNA,exon;Chr3			hypo	#N/A
Chr3	10888197	10888197	+	3.19267e-06	0.000707732	-25.8127	AT3G28865	transposable_element_gene,mRNA,exon;			hypo	#N/A
Chr3	14416060	14416060	+	7.48874e-05	0.00852752	-25.7673	Chr3	transposable_element,transposon_fragment;			hypo	#N/A
Chr3	11296410	11296410	+	5.86868e-06	0.00114763	-25.6934	NONE				hypo	#N/A
Chr3	11019867	11019867	+	2.00202e-08	1.20186e-05	-25.641	AT3G29032	transposable_element_gene,mRNA,exon;Chr3			hypo	#N/A
Chr3	12824699	12824699	+	5.10858e-05	0.00634121	-25.641	Chr3	transposable_element,transposon_fragment;			hypo	#N/A
Chr3	22387808	22387808	+	5.86556e-05	0.00706078	-25.641	AT3G60565	transposable_element_gene,mRNA,exon;Chr3			hypo	#N/A
Chr3	11514320	11514320	+	4.00629e-05	0.00524901	-25.5814	Chr3	transposable_element,transposon_fragment;			hypo	#N/A
Chr3	13644526	13644526	+	5.36651e-05	0.00659432	-25.5814	Chr3	transposable_element,transposon_fragment;			hypo	#N/A
Chr3	15260702	15260702	+	8.9437e-07	0.000255444	-25.5758	Chr3	transposable_element,transposon_fragment;			hypo	#N/A
Chr3	12178677	12178677	+	3.12076e-05	0.00431253	-25.5183	AT3G30587	transposable_element_gene,mRNA,exon;Chr3			hypo	#N/A
Chr3	1557744	1557744	+	9.86822e-12	2.34854e-08	-25.4177	AT3G05410	gene,mRNA,protein;AT3G05415	transposable_element,transposon_fragment;		hypo	#N/A
Chr3	20482567	20482567	+	2.02332e-05	0.00306268	-25.2525	AT3G55254	gene,mRNA,protein,CDS,exon;			hypo	#N/A
Chr3	12949809	12949809	+	3.8482e-05	0.0050845	-25.1989	Chr3	transposable_element,transposon_fragment;			hypo	#N/A
Chr3	12221122	12221122	+	5.97966e-05	0.00716505	-25.1166	AT3G30668	transposable_element_gene,mRNA,exon;Chr3			hypo	#N/A
Chr3	21327606	21327606	+	3.88352e-05	0.00512243	26.1675	AT3G57586	transposable_element_gene,mRNA,exon;Chr3			hyper	#N/A
Chr3	18672202	18672202	+	4.11732e-07	0.000137251	27.4311	AT3G50350	gene,mRNA,protein,exon,CDS;			hyper	#N/A
Chr3	18672220	18672220	+	7.25751e-08	3.39625e-05	27.8227	AT3G50350	gene,mRNA,protein,exon,CDS;			hyper	#N/A
Chr3	16798158	16798158	+	5.14748e-06	0.00103519	28.0735	NONE				hyper	#N/A
Chr3	18672232	18672232	+	1.15531e-07	4.97995e-05	29.4118	AT3G50350	gene,mRNA,protein,exon,CDS;			hyper	#N/A
Chr3	21509754	21509754	+	3.15936e-12	9.09273e-09	29.9225	NONE				hyper	#N/A
Chr3	16798083	16798083	+	3.22308e-06	0.000713128	30.6977	NONE				hyper	#N/A
Chr3	15780650	15780650	+	7.17207e-10	8.13047e-07	34.3968	Chr3	transposable_element,transposon_fragment;			hyper	#N/A
Chr3	17520458	17520458	+	3.55548e-06	0.000771094	38.2127	NONE				hyper	#N/A
Chr3	17520463	17520463	+	9.30114e-06	0.00165341	39.0602	NONE				hyper	#N/A
Chr3	17520491	17520491	+	3.17311e-05	0.00436803	41.0101	NONE				hyper	#N/A
Chr3	17147453	17147453	+	8.03254e-05	0.00900316	42.4224	Chr3	transposable_element;			hyper	#N/A
Chr3	17520487	17520487	+	9.83225e-06	0.00172707	43.4127	NONE				hyper	#N/A
Chr3	17579999	17579999	+	1.68365e-06	0.000423794	55.102	NONE				hyper	#N/A
Chr3	8574665	8574665	+	6.34639e-09	4.72371e-06	56.4103	NONE				hyper	#N/A
Chr3	8574666	8574666	+	6.34639e-09	4.72371e-06	56.4103	NONE				hyper	#N/A
Chr4	1744628	1744628	+	3.28779e-05	0.00449522	-30.5556	AT4G03800	transposable_element_gene,mRNA,exon;Chr4		OK	hypo	#N/A
Chr4	2335191	2335191	+	1.50014e-05	0.00241593	-58.8101	NONE				hypo	#N/A
Chr4	5046186	5046186	+	7.32562e-06	0.00136805	-47.0588	Chr4	transposable_element,transposon_fragment;			hypo	#N/A
Chr4	2198963	2198963	+	8.52335e-05	0.00943489	-42.8571	Chr4	transposable_element,transposon_fragment;			hypo	#N/A
Chr4	2711383	2711383	+	1.19731e-05	0.00201915	-42.3077	AT4G05306	transposable_element_gene,mRNA,exon;Chr4			hypo	#N/A
Chr4	6070434	6070434	+	7.38523e-05	0.0084374	-40	AT4G09595	transposable_element_gene,mRNA,exon;Chr4			hypo	#N/A
Chr4	6081010	6081010	+	1.39281e-08	8.95178e-06	-38.794	AT4G09625	transposable_element_gene,mRNA,exon;Chr4			hypo	#N/A
Chr4	5753618	5753618	+	1.9711e-05	0.00299955	-38.7097	AT4G08970	transposable_element_gene,mRNA,exon;Chr4			hypo	#N/A
Chr4	4760095	4760095	+	6.77777e-07	0.000204216	-37.1581	AT4G07937	transposable_element_gene,mRNA,exon;Chr4			hypo	#N/A
Chr4	6426993	6426993	+	7.67362e-05	0.00868523	-37.1111	Chr4	transposable_element,transposon_fragment;			hypo	#N/A
Chr4	3964629	3964629	+	5.2637e-05	0.00649434	-36	AT4G06708	transposable_element_gene,mRNA,exon;Chr4			hypo	#N/A
Chr4	6650645	6650645	+	8.95305e-05	0.00979578	-35.4312	NONE				hypo	#N/A
Chr4	5257500	5257500	+	1.74492e-05	0.00272232	-34.4828	Chr4	transposable_element,transposon_fragment;			hypo	#N/A
Chr4	2299411	2299411	+	6.95962e-05	0.00806114	-33.5913	AT4G04590	transposable_element_gene,mRNA,exon;Chr4			hypo	#N/A
Chr4	4288450	4288450	+	3.55289e-05	0.00477603	-33.3333	Chr4	transposable_element,transposon_fragment;			hypo	#N/A
Chr4	5108464	5108464	+	1.27218e-05	0.00211886	-33.3333	Chr4	transposable_element,transposon_fragment;			hypo	#N/A
Chr4	6915639	6915639	+	1.75781e-05	0.00273917	-33.2941	AT4G11375	transposable_element_gene,mRNA,exon;Chr4			hypo	#N/A
Chr4	3930037	3930037	+	3.14265e-05	0.00433441	-32.5926	AT4G06692	transposable_element_gene,mRNA,exon;Chr4			hypo	#N/A
Chr4	861859	861859	+	1.48945e-05	0.00240238	-32.5581	AT4G01975	transposable_element_gene,mRNA,exon;Chr4			hypo	#N/A
Chr4	3636117	3636117	+	4.61673e-05	0.00586715	-32.4828	AT4G06593	transposable_element_gene,mRNA,exon;Chr4			hypo	#N/A
Chr4	11822053	11822053	+	9.20206e-06	0.00163978	-32.4324	AT4G22415	transposable_element_gene,mRNA,exon;Chr4			hypo	#N/A
Chr4	3565463	3565463	+	7.99125e-05	0.00896646	-32.1429	Chr4	transposable_element,transposon_fragment;			hypo	#N/A
Chr4	1448597	1448597	+	5.70763e-05	0.00691489	-32.0623	AT4G03300	transposable_element_gene,mRNA;			hypo	#N/A
Chr4	3311909	3311909	+	2.12497e-06	0.000510485	-31.7073	AT4G06524	transposable_element_gene,mRNA,exon;Chr4			hypo	#N/A
Chr4	1801689	1801689	+	5.51696e-05	0.00673355	-31.4286	Chr4	transposable_element,transposon_fragment;			hypo	#N/A
Chr4	3831653	3831653	+	4.5729e-05	0.0058235	-31.4286	Chr4	transposable_element,transposon_fragment;			hypo	#N/A
Chr4	2281192	2281192	+	1.91298e-05	0.00292916	-31.25	Chr4	transposable_element,transposon_fragment;			hypo	#N/A
Chr4	4385359	4385359	+	9.50577e-08	4.24473e-05	-30.9067	AT4G07563	transposable_element_gene,mRNA,exon;Chr4			hypo	#N/A
Chr4	1448267	1448267	+	8.63309e-07	0.000248325	-30.6343	AT4G03300	transposable_element_gene,mRNA;			hypo	#N/A
Chr4	632394	632394	+	1.42786e-05	0.00232198	-30.609	AT4G01490	transposable_element_gene,mRNA,exon;Chr4			hypo	#N/A
Chr4	3007144	3007144	+	1.69949e-06	0.000426921	-30.4348	AT4G05634	transposable_element_gene,mRNA,exon;Chr4			hypo	#N/A
Chr4	5645000	5645000	+	5.1956e-05	0.00642528	-30.0784	AT4G08860	transposable_element_gene,mRNA,exon;Chr4			hypo	#N/A
Chr4	2431745	2431745	+	5.21721e-05	0.00644686	-30.0435	NONE				hypo	#N/A
Chr4	5065472	5065472	+	3.00546e-07	0.000106867	-29.8509	AT4G08113	transposable_element_gene,mRNA,exon;Chr4			hypo	#N/A
Chr4	3691682	3691682	+	8.33666e-07	0.000241493	-29.7304	Chr4	transposable_element,transposon_fragment;			hypo	#N/A
Chr4	6655115	6655115	+	5.61159e-10	6.62061e-07	-29.6455	NONE				hypo	#N/A
Chr4	2285057	2285057	+	6.00854e-05	0.00719158	-29.596	AT4G04560	transposable_element_gene,mRNA,exon;Chr4			hypo	#N/A
Chr4	3844243	3844243	+	5.89835e-05	0.00709364	-29.5455	AT4G06656	transposable_element_gene,mRNA,exon;Chr4			hypo	#N/A
Chr4	8421639	8421639	+	8.86718e-05	0.00972442	-29.4926	Chr4	transposable_element,transposon_fragment;			hypo	#N/A
Chr4	2287819	2287819	+	5.56837e-08	2.7434e-05	-29.2897	AT4G04560	transposable_element_gene,mRNA,exon;Chr4			hypo	#N/A
Chr4	6057351	6057351	+	2.95717e-06	0.00066662	-29.1806	NONE				hypo	#N/A
Chr4	4857028	4857028	+	6.82328e-07	0.000205204	-29.1209	AT4G08030	transposable_element_gene,mRNA,exon;Chr4			hypo	#N/A
Chr4	5075096	5075096	+	3.0485e-07	0.00010808	-28.9793	AT4G08115	transposable_element_gene,mRNA,exon;Chr4			hypo	#N/A
Chr4	1565396	1565396	+	1.30566e-07	5.48591e-05	-28.9087	NONE				hypo	#N/A
Chr4	5060222	5060222	+	1.09422e-05	0.00188096	-28.8594	Chr4	transposable_element,transposon_fragment;			hypo	#N/A
Chr4	4488556	4488556	+	5.54947e-05	0.00676174	-28.5714	Chr4	transposable_element,transposon_fragment;			hypo	#N/A
Chr4	4022036	4022036	+	8.30281e-05	0.00923798	-28.2051	Chr4	transposable_element,transposon_fragment;			hypo	#N/A
Chr4	4488531	4488531	+	4.24869e-05	0.00549492	-28.125	Chr4	transposable_element,transposon_fragment;			hypo	#N/A
Chr4	10543230	10543230	+	5.13136e-05	0.00636207	-28	AT4G19300	transposable_element_gene,mRNA,exon;Chr4			hypo	#N/A
Chr4	5132289	5132289	+	1.71859e-06	0.000430658	-27.7778	AT4G08138	transposable_element_gene,mRNA,exon;Chr4			hypo	#N/A
Chr4	2870768	2870768	+	1.83512e-10	2.66261e-07	-27.6705	AT4G05585	transposable_element_gene,mRNA,exon;Chr4			hypo	#N/A
Chr4	1454401	1454401	+	7.2835e-06	0.00136161	-27.6596	AT4G03300	transposable_element_gene,mRNA;			hypo	#N/A
Chr4	5625034	5625034	+	7.86091e-05	0.00885096	-27.5862	AT4G08830	transposable_element_gene,mRNA,exon;Chr4			hypo	#N/A
Chr4	5044003	5044003	+	1.56419e-05	0.00249563	-27.5376	Chr4	transposable_element,transposon_fragment;			hypo	#N/A
Chr4	6128954	6128954	+	2.32799e-06	0.000549752	-27.4616	AT4G09710	transposable_element_gene,mRNA,exon;Chr4			hypo	#N/A
Chr4	10553734	10553734	+	1.66531e-05	0.00262361	-27.2727	Chr4	transposable_element,transposon_fragment;			hypo	#N/A
Chr4	3944623	3944623	+	6.69526e-07	0.000202107	-27.1186	AT4G06699	transposable_element_gene,mRNA,exon;Chr4			hypo	#N/A
Chr4	6953794	6953794	+	7.62292e-05	0.00864173	-27.1035	AT4G11430	gene,mRNA,protein,exon,CDS;			hypo	#N/A
Chr4	4647194	4647194	+	5.53102e-12	1.45475e-08	-26.9661	AT4G07830	transposable_element_gene,mRNA,exon;Chr4			hypo	#N/A
Chr4	5397503	5397503	+	6.46517e-06	0.0012407	-26.9367	Chr4	transposable_element,transposon_fragment;			hypo	#N/A
Chr4	1763831	1763831	+	4.25026e-05	0.00549621	-26.8197	AT4G03813	transposable_element_gene,mRNA,exon;			hypo	#N/A
Chr4	5081026	5081026	+	4.80671e-07	0.000154672	-26.7857	AT4G08100	transposable_element_gene,mRNA,exon;Chr4			hypo	#N/A
Chr4	5078947	5078947	+	4.86334e-05	0.00611443	-26.7316	NONE				hypo	#N/A
Chr4	3468873	3468873	+	5.91888e-05	0.00711171	-26.6667	Chr4	transposable_element,transposon_fragment;			hypo	#N/A
Chr4	4945574	4945574	+	4.36157e-05	0.00560928	-26.6667	AT4G08072	transposable_element_gene,mRNA,exon;Chr4			hypo	#N/A
Chr4	4647423	4647423	+	2.23821e-12	6.83784e-09	-26.6448	AT4G07830	transposable_element_gene,mRNA,exon;Chr4			hypo	#N/A
Chr4	4212134	4212134	+	1.37117e-10	2.08464e-07	-26.6258	AT4G07415	transposable_element_gene,mRNA,exon;Chr4			hypo	#N/A
Chr4	14334157	14334157	+	6.6167e-06	0.00126278	-26.5306	AT4G29090	gene,mRNA,protein,exon,CDS;Chr4			hypo	#N/A
Chr4	7692093	7692093	+	8.32698e-05	0.00925963	-26.4706	AT4G13253	transposable_element_gene,mRNA,exon;Chr4			hypo	#N/A
Chr4	11042103	11042103	+	5.23343e-09	4.04652e-06	-26.3132	AT4G20510	transposable_element_gene,mRNA,exon;Chr4			hypo	#N/A
Chr4	4560431	4560431	+	3.51051e-05	0.00473316	-26.1834	Chr4	transposable_element,transposon_fragment;			hypo	#N/A
Chr4	5025661	5025661	+	2.00298e-06	0.000486943	-26.1538	AT4G08105	transposable_element_gene,mRNA,exon;Chr4			hypo	#N/A
Chr4	4043588	4043588	+	1.31064e-05	0.00216791	-26.087	Chr4	transposable_element,transposon_fragment;			hypo	#N/A
Chr4	4050953	4050953	+	1.75123e-05	0.00273067	-26.087	AT4G06742	transposable_element_gene,mRNA,exon;Chr4			hypo	#N/A
Chr4	6729451	6729451	+	6.14058e-11	1.06641e-07	-26.0319	AT4G10990	transposable_element_gene,mRNA,exon;			hypo	#N/A
Chr4	4760107	4760107	+	1.89447e-05	0.00290714	-25.8724	AT4G07937	transposable_element_gene,mRNA,exon;Chr4			hypo	#N/A
Chr4	5068599	5068599	+	6.77038e-08	3.21192e-05	-25.7952	AT4G08114	transposable_element_gene,mRNA,exon;Chr4			hypo	#N/A
Chr4	3468894	3468894	+	7.37905e-05	0.00843208	-25.7759	Chr4	transposable_element,transposon_fragment;			hypo	#N/A
Chr4	5489961	5489961	+	7.66805e-05	0.00868095	-25.7728	AT4G08602	transposable_element_gene,mRNA,exon;Chr4			hypo	#N/A
Chr4	3746759	3746759	+	8.74817e-05	0.0096244	-25.7143	AT4G06626	transposable_element_gene,mRNA,exon;Chr4			hypo	#N/A
Chr4	5065647	5065647	+	1.36086e-06	0.000357686	-25.7112	AT4G08113	transposable_element_gene,mRNA,exon;Chr4			hypo	#N/A
Chr4	4719730	4719730	+	1.53946e-07	6.2579e-05	-25.641	Chr4	transposable_element,transposon_fragment;			hypo	#N/A
Chr4	9734837	9734837	+	1.11266e-05	0.00190573	-25.641	AT4G17450	transposable_element_gene,mRNA,exon;Chr4			hypo	#N/A
Chr4	11368155	11368155	+	4.45772e-05	0.00570719	-25.641	Chr4	transposable_element,transposon_fragment;			hypo	#N/A
Chr4	1788236	1788236	+	2.18162e-06	0.000521404	-25.6256	Chr4	transposable_element,transposon_fragment;			hypo	#N/A
Chr4	5934211	5934211	+	3.56782e-07	0.000122428	-25.594	Chr4	transposable_element,transposon_fragment;			hypo	#N/A
Chr4	4946512	4946512	+	5.04789e-05	0.00628814	-25.4902	AT4G08072	transposable_element_gene,mRNA,exon;Chr4			hypo	#N/A
Chr4	634384	634384	+	2.50895e-06	0.000584196	-25.4237	AT4G01490	transposable_element_gene,mRNA,exon;Chr4			hypo	#N/A
Chr4	4100757	4100757	+	2.47873e-07	9.16428e-05	-25.3968	AT4G06752	transposable_element_gene,mRNA,exon;Chr4			hypo	#N/A
Chr4	1455248	1455248	+	5.95399e-05	0.00714323	-25.3456	AT4G03300	transposable_element_gene,mRNA,exon;Chr4			hypo	#N/A
Chr4	3860904	3860904	+	3.95095e-08	2.07692e-05	-25.3333	NONE				hypo	#N/A
Chr4	5269893	5269893	+	2.23095e-09	2.03269e-06	-25.2747	AT4G08340	transposable_element_gene,mRNA,exon;Chr4			hypo	#N/A
Chr4	4563529	4563529	+	1.94613e-10	2.8027e-07	-25.2739	AT4G07755	transposable_element_gene,mRNA,exon;Chr4			hypo	#N/A
Chr4	5401796	5401796	+	4.3665e-06	0.000908951	-25.2723	Chr4	transposable_element,transposon_fragment;			hypo	#N/A
Chr4	4440328	4440328	+	1.7367e-11	3.71165e-08	-25.2252	AT4G07660	transposable_element_gene,mRNA,exon;Chr4			hypo	#N/A
Chr4	5052308	5052308	+	6.18547e-11	1.07198e-07	-25.2174	AT4G08109	transposable_element_gene,mRNA,exon;Chr4			hypo	#N/A
Chr4	5024857	5024857	+	2.68889e-07	9.78636e-05	-25.153	AT4G08105	transposable_element_gene,mRNA,exon;Chr4			hypo	#N/A
Chr4	5061076	5061076	+	2.11672e-05	0.00317247	-25.1464	AT4G08112	transposable_element_gene,mRNA,exon;Chr4			hypo	#N/A
Chr4	6729659	6729659	+	1.09871e-05	0.00188651	-25.0238	AT4G10990	transposable_element_gene,mRNA,exon;			hypo	#N/A
Chr4	4759350	4759350	+	5.87036e-07	0.000181632	25.9184	AT4G07937	transposable_element_gene,mRNA,exon;Chr4			hyper	#N/A
Chr4	7527210	7527210	+	7.24546e-08	3.39247e-05	26.7606	AT4G12820	gene,mRNA,protein,CDS,exon;			hyper	#N/A
Chr4	7527211	7527211	+	7.24546e-08	3.39247e-05	26.7606	AT4G12820	gene,mRNA,protein,CDS,exon;			hyper	#N/A
Chr4	16891299	16891299	+	1.52752e-05	0.00245004	29.2683	NONE				hyper	#N/A
Chr4	6532697	6532697	+	2.65281e-05	0.00379462	32.3853	AT4G10580	transposable_element_gene,mRNA,exon;Chr4			hyper	#N/A
Chr4	6551649	6551649	+	2.37681e-09	2.13796e-06	40	AT4G10603	gene,mRNA,protein,exon,CDS;			hyper	#N/A
Chr5	26259966	26259966	+	7.84262e-13	2.81786e-09	-45.6824	Chr5	transposable_element,transposon_fragment;			hypo	OK
Chr5	26258525	26258525	+	1.51059e-05	0.00242871	-37.0968	AT5G65676	transposable_element_gene,mRNA,exon;Chr5		OK	hypo	#N/A
Chr5	10359821	10359821	+	1.52862e-08	9.64245e-06	-28.93	AT5G28415	transposable_element_gene,mRNA,exon;Chr5		OK	hypo	#N/A
Chr5	26258887	26258887	+	2.74891e-13	1.15965e-09	-26.9207	AT5G65676	transposable_element_gene,mRNA,exon;Chr5		OK	hypo	#N/A
Chr5	10363830	10363830	+	4.56481e-05	0.00581672	-26.7311	AT5G28415	transposable_element_gene,mRNA,exon;Chr5		OK	hypo	#N/A
Chr5	13618245	13618245	+	5.07032e-05	0.00630676	-64.7059	Chr5	transposable_element,transposon_fragment;			hypo	#N/A
Chr5	9281185	9281185	+	5.28976e-05	0.00651903	-61.9048	NONE				hypo	#N/A
Chr5	8893338	8893338	+	4.9158e-05	0.00616419	-56.5217	NONE				hypo	#N/A
Chr5	355864	355864	+	4.2247e-07	0.000139832	-49.3506	Chr5	transposable_element,transposon_fragment;			hypo	#N/A
Chr5	2036860	2036860	+	1.2275e-05	0.00205949	-48.7043	AT5G06630	gene,mRNA,protein,CDS,exon;			hypo	#N/A
Chr5	8893314	8893314	+	3.17718e-07	0.000111754	-43.3333	NONE				hypo	#N/A
Chr5	17897063	17897063	+	7.80887e-06	0.00143826	-41.4031	AT5G44416	transposable_element_gene,mRNA,exon;Chr5			hypo	#N/A
Chr5	15286594	15286594	+	3.4567e-06	0.00075389	-38.2353	NONE				hypo	#N/A
Chr5	14584534	14584534	+	1.36327e-05	0.00223723	-36.3636	AT5G36935	transposable_element_gene,mRNA,exon;Chr5			hypo	#N/A
Chr5	18933757	18933757	+	2.1886e-08	1.29028e-05	-35.8209	Chr5	transposable_element,transposon_fragment;			hypo	#N/A
Chr5	12195188	12195188	+	2.17712e-05	0.00324307	-35.4839	Chr5	transposable_element,transposon_fragment;			hypo	#N/A
Chr5	10712806	10712806	+	2.19836e-06	0.000524444	-34.8837	Chr5	transposable_element,transposon_fragment;			hypo	#N/A
Chr5	15491249	15491249	+	4.13349e-05	0.00537677	-34.6429	Chr5	transposable_element,transposon_fragment;			hypo	#N/A
Chr5	13889750	13889750	+	5.75753e-05	0.0069608	-34.6154	AT5G35725	transposable_element_gene,mRNA,exon;Chr5			hypo	#N/A
Chr5	12753614	12753614	+	7.91079e-05	0.00889598	-34.4828	AT5G33438	transposable_element_gene,mRNA,exon;Chr5			hypo	#N/A
Chr5	9323668	9323668	+	7.67797e-05	0.00868851	-34.1304	NONE				hypo	#N/A
Chr5	7027807	7027807	+	1.66989e-06	0.000421123	-34.0108	AT5G20750	transposable_element_gene,mRNA;			hypo	#N/A
Chr5	13325619	13325619	+	8.71906e-05	0.00959809	-34.0022	AT5G35057	transposable_element_gene,mRNA,exon;Chr5			hypo	#N/A
Chr5	2040592	2040592	+	9.53236e-07	0.000268885	-33.7436	AT5G06640	gene,mRNA,protein,CDS,exon;			hypo	#N/A
Chr5	8893347	8893347	+	9.89607e-06	0.00173577	-33.3333	NONE				hypo	#N/A
Chr5	10580774	10580774	+	1.90858e-05	0.00292369	-33.3333	AT5G28590	gene,mRNA,protein;			hypo	#N/A
Chr5	12232913	12232913	+	5.58669e-05	0.00679854	-33.3333	AT5G32593	transposable_element_gene,mRNA,exon;Chr5			hypo	#N/A
Chr5	12523496	12523496	+	5.25834e-05	0.0064892	-33.3333	Chr5	transposable_element,transposon_fragment;			hypo	#N/A
Chr5	14261854	14261854	+	6.96426e-06	0.00131442	-33.3333	Chr5	transposable_element,transposon_fragment;			hypo	#N/A
Chr5	15244811	15244811	+	3.24189e-07	0.000113505	-33.3051	NONE				hypo	#N/A
Chr5	14680753	14680753	+	8.45149e-08	3.84794e-05	-33.1953	NONE				hypo	#N/A
Chr5	10127390	10127390	+	4.42381e-07	0.000145075	-32.5926	NONE				hypo	#N/A
Chr5	10354205	10354205	+	3.36643e-05	0.00457871	-32.4507	AT5G28405	transposable_element_gene,mRNA,exon;Chr5			hypo	#N/A
Chr5	6406016	6406016	+	1.7661e-07	6.98522e-05	-32	AT5G19097	transposable_element_gene,mRNA,exon;Chr5			hypo	#N/A
Chr5	10403004	10403004	+	6.133e-05	0.00731278	-32	Chr5	transposable_element,transposon_fragment;			hypo	#N/A
Chr5	10241466	10241466	+	8.40425e-05	0.00932473	-31.9048	AT5G28263	transposable_element_gene,mRNA,exon;Chr5			hypo	#N/A
Chr5	9187992	9187992	+	1.13974e-08	7.64101e-06	-31.8873	Chr5	transposable_element,transposon_fragment;			hypo	#N/A
Chr5	8928386	8928386	+	2.39656e-05	0.00350344	-31.5789	Chr5	transposable_element,transposon_fragment;			hypo	#N/A
Chr5	13023478	13023478	+	5.78353e-06	0.00113506	-31.5789	Chr5	transposable_element,transposon_fragment;			hypo	#N/A
Chr5	9644359	9644359	+	3.53936e-07	0.000121688	-31.5771	NONE				hypo	#N/A
Chr5	26259921	26259921	+	1.63402e-05	0.00258408	-31.3273	Chr5	transposable_element,transposon_fragment;			hypo	#N/A
Chr5	13032160	13032160	+	6.12869e-05	0.00730831	-31.25	Chr5	transposable_element,transposon_fragment;			hypo	#N/A
Chr5	26070273	26070273	+	6.08736e-07	0.000187315	-31.0541	Chr5	transposable_element,transposon_fragment;			hypo	#N/A
Chr5	3906754	3906754	+	9.96096e-06	0.00174478	-30.974	AT5G12085	transposable_element_gene,mRNA,exon;Chr5			hypo	#N/A
Chr5	13126724	13126724	+	3.71744e-06	0.000800144	-30.9524	AT5G34856	transposable_element_gene,mRNA,exon;Chr5			hypo	#N/A
Chr5	503323	503323	+	4.17875e-05	0.00542328	-30.7648	NONE				hypo	#N/A
Chr5	12297029	12297029	+	8.43191e-07	0.000243659	-30.6187	Chr5	transposable_element,transposon_fragment;			hypo	#N/A
Chr5	15494729	15494729	+	1.43163e-05	0.00232656	-30.5847	AT5G38705	transposable_element_gene,mRNA,exon;Chr5			hypo	#N/A
Chr5	29228	29228	+	6.5108e-06	0.00124779	-30.5556	NONE				hypo	#N/A
Chr5	8930809	8930809	+	8.16434e-05	0.00911583	-30.5556	AT5G25615	transposable_element_gene,mRNA,exon;Chr5			hypo	#N/A
Chr5	9893109	9893109	+	1.25077e-07	5.29953e-05	-30.0783	AT5G27885	transposable_element_gene,mRNA,exon;Chr5			hypo	#N/A
Chr5	8893346	8893346	+	3.1353e-05	0.00432659	-30	NONE				hypo	#N/A
Chr5	8893351	8893351	+	3.1353e-05	0.00432659	-30	NONE				hypo	#N/A
Chr5	11476447	11476447	+	4.71835e-05	0.00597263	-29.7872	AT5G32002	transposable_element_gene,mRNA,exon;Chr5			hypo	#N/A
Chr5	11982670	11982670	+	6.94008e-06	0.00131081	-29.7872	AT5G32345	transposable_element_gene,mRNA,exon;Chr5			hypo	#N/A
Chr5	3909743	3909743	+	3.77181e-05	0.00500694	-29.7778	AT5G12090	gene,mRNA,protein;Chr5			hypo	#N/A
Chr5	5113898	5113898	+	3.07791e-05	0.00426591	-29.7774	AT5G15690	gene,mRNA,protein,CDS,exon;			hypo	#N/A
Chr5	12711898	12711898	+	5.72266e-05	0.00692985	-29.7297	Chr5	transposable_element,transposon_fragment;			hypo	#N/A
Chr5	12507390	12507390	+	7.31263e-08	3.41649e-05	-29.6701	Chr5	transposable_element,transposon_fragment;			hypo	#N/A
Chr5	20061611	20061611	+	2.53186e-07	9.3168e-05	-29.5775	AT5G49465	transposable_element_gene,mRNA,exon;Chr5			hypo	#N/A
Chr5	14833753	14833753	+	1.42469e-07	5.87978e-05	-29.4947	AT5G37390	transposable_element_gene,mRNA,exon;Chr5			hypo	#N/A
Chr5	9185275	9185275	+	5.97604e-05	0.00716174	-29.4623	AT5G26236	transposable_element_gene,mRNA,exon;Chr5			hypo	#N/A
Chr5	7038096	7038096	+	2.10218e-06	0.000506203	-29.2683	AT5G20780	transposable_element_gene,mRNA,exon;			hypo	#N/A
Chr5	13989361	13989361	+	4.27705e-11	7.92614e-08	-29.1879	Chr5	transposable_element,transposon_fragment;			hypo	#N/A
Chr5	14579019	14579019	+	1.18408e-06	0.000319703	-29.0433	AT5G36935	transposable_element_gene,mRNA,exon;Chr5			hypo	#N/A
Chr5	13373773	13373773	+	4.48275e-05	0.00573413	-29.0278	AT5G35113	transposable_element_gene,mRNA,exon;Chr5			hypo	#N/A
Chr5	11650188	11650188	+	2.04574e-05	0.00308841	-29.011	Chr5	transposable_element,transposon_fragment;			hypo	#N/A
Chr5	12512306	12512306	+	7.13246e-05	0.00821252	-28.9912	NONE				hypo	#N/A
Chr5	9909661	9909661	+	1.3469e-10	2.05662e-07	-28.9474	AT5G27895	transposable_element_gene,mRNA,exon;			hypo	#N/A
Chr5	14616310	14616310	+	2.54728e-06	0.000591378	-28.9474	Chr5	transposable_element;			hypo	#N/A
Chr5	3908717	3908717	+	4.67825e-06	0.000960555	-28.7879	AT5G12085	transposable_element_gene,mRNA,exon;Chr5			hypo	#N/A
Chr5	14833692	14833692	+	5.31217e-11	9.44704e-08	-28.7374	AT5G37390	transposable_element_gene,mRNA,exon;Chr5			hypo	#N/A
Chr5	15923602	15923602	+	2.6422e-05	0.00378182	-28.5745	AT5G39770	gene,mRNA,protein;			hypo	#N/A
Chr5	11982713	11982713	+	5.06692e-06	0.00102279	-28.5714	AT5G32345	transposable_element_gene,mRNA,exon;Chr5			hypo	#N/A
Chr5	17308317	17308317	+	2.24656e-06	0.000533806	-28.4483	AT5G43105	transposable_element_gene,mRNA,exon;Chr5			hypo	#N/A
Chr5	21169312	21169312	+	3.38268e-11	6.51798e-08	-28.3965	AT5G52090	gene,mRNA,protein,CDS,exon;			hypo	#N/A
Chr5	11421067	11421067	+	2.79602e-07	0.000100938	-28.3333	AT5G31212	transposable_element_gene,mRNA,exon;Chr5			hypo	#N/A
Chr5	6210378	6210378	+	6.57072e-05	0.00771675	-28.125	AT5G18633	transposable_element_gene,mRNA,exon;Chr5			hypo	#N/A
Chr5	14547570	14547570	+	5.77316e-15	4.44082e-11	-28.021	AT5G36900	gene,mRNA,protein;			hypo	#N/A
Chr5	11454534	11454534	+	4.24023e-06	0.000888629	-27.907	AT5G32103	transposable_element_gene,mRNA,exon;Chr5			hypo	#N/A
Chr5	21544346	21544346	+	3.09817e-05	0.00428909	-27.907	AT5G53135	transposable_element_gene,mRNA,exon;Chr5			hypo	#N/A
Chr5	8930269	8930269	+	4.71668e-05	0.00597111	-27.8931	AT5G25615	transposable_element_gene,mRNA,exon;Chr5			hypo	#N/A
Chr5	70068	70068	+	2.25537e-07	8.47674e-05	-27.8203	Chr5	transposable_element,transposon_fragment;			hypo	#N/A
Chr5	9417327	9417327	+	2.68861e-05	0.00383338	-27.5458	NONE				hypo	#N/A
Chr5	15244798	15244798	+	6.82282e-06	0.00129371	-27.4764	NONE				hypo	#N/A
Chr5	13651051	13651051	+	2.81513e-06	0.000640551	-27.451	Chr5	transposable_element,transposon_fragment;			hypo	#N/A
Chr5	13123554	13123554	+	1.28052e-08	8.37023e-06	-27.3973	AT5G34856	transposable_element_gene,mRNA,exon;Chr5			hypo	#N/A
Chr5	12740637	12740637	+	1.3218e-05	0.00218274	-27.2727	Chr5	transposable_element,transposon_fragment;			hypo	#N/A
Chr5	10732843	10732843	+	2.81126e-06	0.000639792	-27.2349	AT5G28692	transposable_element_gene,mRNA,exon;Chr5			hypo	#N/A
Chr5	8550780	8550780	+	1.14543e-08	7.67086e-06	-27.162	Chr5	transposable_element,transposon_fragment;			hypo	#N/A
Chr5	13071532	13071532	+	9.2016e-10	9.901e-07	-27.0322	AT5G34849	transposable_element_gene,mRNA,exon;Chr5			hypo	#N/A
Chr5	13650992	13650992	+	1.76034e-07	6.96812e-05	-26.9393	Chr5	transposable_element,transposon_fragment;			hypo	#N/A
Chr5	11585697	11585697	+	1.61629e-06	0.000410811	-26.9231	Chr5	transposable_element,transposon_fragment;			hypo	#N/A
Chr5	7030519	7030519	+	1.11022e-16	1.32845e-12	-26.8569	AT5G20750	transposable_element_gene,mRNA;Chr5			hypo	#N/A
Chr5	14833480	14833480	+	2.48674e-07	9.18602e-05	-26.7442	AT5G37390	transposable_element_gene,mRNA;Chr5			hypo	#N/A
Chr5	12074770	12074770	+	1.24268e-05	0.00207974	-26.7257	NONE				hypo	#N/A
Chr5	4209467	4209467	+	4.54849e-06	0.00093947	-26.6667	AT5G13205	transposable_element_gene,mRNA,exon;Chr5			hypo	#N/A
Chr5	8893372	8893372	+	2.31639e-05	0.00341094	-26.6667	NONE				hypo	#N/A
Chr5	9712072	9712072	+	5.40825e-06	0.00107694	-26.6667	AT5G27505	transposable_element_gene,mRNA,exon;Chr5			hypo	#N/A
Chr5	6210274	6210274	+	1.00661e-07	4.44136e-05	-26.6576	AT5G18633	transposable_element_gene,mRNA,exon;Chr5			hypo	#N/A
Chr5	8575241	8575241	+	4.60074e-05	0.00585165	-26.5046	AT5G24915	transposable_element_gene,mRNA,exon;Chr5			hypo	#N/A
Chr5	11771209	11771209	+	2.34663e-08	1.36702e-05	-26.4438	AT5G31927	transposable_element_gene,mRNA,exon;Chr5			hypo	#N/A
Chr5	10549908	10549908	+	1.68128e-06	0.000423307	-26.4151	AT5G28545	transposable_element_gene,mRNA,exon;Chr5			hypo	#N/A
Chr5	12505922	12505922	+	1.43848e-08	9.18451e-06	-26.3399	AT5G33252	transposable_element_gene,mRNA,exon;Chr5			hypo	#N/A
Chr5	8723061	8723061	+	1.12066e-06	0.000305658	-26.2184	AT5G25205	transposable_element_gene,mRNA,exon;Chr5			hypo	#N/A
Chr5	11683405	11683405	+	2.92265e-05	0.00409524	-26.1905	NONE				hypo	#N/A
Chr5	13651661	13651661	+	7.1887e-05	0.00826083	-26.1905	Chr5	transposable_element,transposon_fragment;			hypo	#N/A
Chr5	13933684	13933684	+	2.20686e-07	8.32752e-05	-26.1905	NONE				hypo	#N/A
Chr5	7505309	7505309	+	8.59501e-06	0.00155143	-26.087	AT5G22590	gene,mRNA,protein,exon,CDS;			hypo	#N/A
Chr5	11806484	11806484	+	3.30711e-05	0.0045145	-25.9527	Chr5	transposable_element,transposon_fragment;			hypo	#N/A
Chr5	7037054	7037054	+	2.10886e-08	1.25299e-05	-25.912	AT5G20780	transposable_element_gene,mRNA,exon;Chr5			hypo	#N/A
Chr5	65165	65165	+	3.47767e-06	0.000757142	-25.8775	Chr5	transposable_element,transposon_fragment;			hypo	#N/A
Chr5	9996061	9996061	+	5.08983e-05	0.00632616	-25.8333	AT5G27965	transposable_element_gene,mRNA,exon;Chr5			hypo	#N/A
Chr5	15648205	15648205	+	5.11742e-11	9.1807e-08	-25.6824	AT5G39095	transposable_element_gene,mRNA,exon;Chr5			hypo	#N/A
Chr5	71140	71140	+	1.51196e-06	0.000389426	-25.6522	Chr5	transposable_element,transposon_fragment;			hypo	#N/A
Chr5	11930314	11930314	+	6.22971e-05	0.00740327	-25.5814	NONE				hypo	#N/A
Chr5	17440975	17440975	+	1.29537e-05	0.0021488	-25.5057	AT5G43415	transposable_element_gene,mRNA,exon;			hypo	#N/A
Chr5	10727314	10727314	+	2.65656e-05	0.00379831	-25.4902	Chr5	transposable_element,transposon_fragment;			hypo	#N/A
Chr5	11098629	11098629	+	6.9798e-06	0.00131671	-25.4902	NONE				hypo	#N/A
Chr5	12240908	12240908	+	1.44162e-05	0.00234005	-25.4902	Chr5	transposable_element,transposon_fragment;			hypo	#N/A
Chr5	13396496	13396496	+	6.82599e-09	5.0201e-06	-25.4813	Chr5	transposable_element,transposon_fragment;			hypo	#N/A
Chr5	9183231	9183231	+	3.21392e-08	1.75863e-05	-25.4759	AT5G26236	transposable_element_gene,mRNA,exon;Chr5			hypo	#N/A
Chr5	7027865	7027865	+	5.09134e-06	0.00102655	-25.4308	AT5G20750	transposable_element_gene,mRNA;			hypo	#N/A
Chr5	10777389	10777389	+	7.13873e-14	3.73493e-10	-25.3846	Chr5	transposable_element,transposon_fragment;			hypo	#N/A
Chr5	8928366	8928366	+	1.65004e-05	0.00260466	-25.3304	Chr5	transposable_element,transposon_fragment;			hypo	#N/A
Chr5	16259974	16259974	+	1.9984e-15	1.73323e-11	-25.3086	AT5G40605	transposable_element_gene,mRNA,exon;			hypo	#N/A
Chr5	15719280	15719280	+	6.95276e-08	3.28373e-05	-25.3012	AT5G39245	transposable_element_gene,mRNA,exon;Chr5			hypo	#N/A
Chr5	15336660	15336660	+	4.23285e-06	0.000887419	-25.2929	AT5G38365	transposable_element_gene,mRNA,exon;Chr5			hypo	#N/A
Chr5	2261080	2261080	+	1.83623e-05	0.00283584	-25.137	AT5G07215	transposable_element_gene,mRNA,exon;Chr5			hypo	#N/A
Chr5	11347688	11347688	+	2.43139e-14	1.49621e-10	-25.0723	AT5G30189	transposable_element_gene,mRNA,exon;Chr5			hypo	#N/A
Chr5	9948847	9948847	+	1.78606e-06	0.000444293	-25.0617	NONE				hypo	#N/A
Chr5	18143122	18143122	+	3.12361e-12	9.00901e-09	-25.0553	AT5G44925	transposable_element_gene,mRNA,exon;Chr5			hypo	#N/A
Chr5	18142555	18142555	+	5.11979e-11	9.18072e-08	-25.0299	AT5G44925	transposable_element_gene,mRNA,exon;Chr5			hypo	#N/A
Chr5	12625541	12625541	+	1.78975e-07	7.05916e-05	-25.0277	Chr5	transposable_element,transposon_fragment;			hypo	#N/A
Chr5	14273197	14273197	+	0	0	28.4588	AT5G36228	gene,mRNA,exon,three_prime_UTR;			hyper	#N/A
Chr5	14256324	14256324	+	4.98343e-05	0.00622765	36.2051	NONE				hyper	#N/A
Chr5	12578572	12578572	+	6.5152e-06	0.00124844	36.964	AT5G33310	pseudogene,pseudogenic_transcript,pseudogenic_exon;			hyper	#N/A

## Sheet: 500_CHH10%
chr	start	end	strand	pvalue	qvalue	meth.diff	geneinfo	category1	description	5% geneinfo match	hyper/hypo	5% DMbase (start) match
Chr2	13717380	13717380	+	0	0	-78.5714	AT2G32291	pseudogene,pseudogenic_transcript,pseudogenic_exon;		OK	hypo	OK
Chr2	13717343	13717343	+	3.26185e-11	1.01961e-06	-68.2927	AT2G32291	pseudogene,pseudogenic_transcript,pseudogenic_exon;		OK	hypo	OK
Chr2	13717418	13717418	+	9.05795e-11	2.62452e-06	-54.1295	AT2G32291	pseudogene,pseudogenic_transcript,pseudogenic_exon;		OK	hypo	OK
Chr1	8837263	8837263	+	1.74305e-14	9.15639e-10	-44.8523	AT1G25220	gene,mRNA,three_prime_UTR,exon;	anthranilate synthase beta subunit 1	OK	hypo	OK
Chr1	8837280	8837280	+	7.15838e-12	2.48326e-07	-34.6809	AT1G25220	gene,mRNA,three_prime_UTR,exon;	anthranilate synthase beta subunit 1	OK	hypo	OK
Chr1	9630648	9630648	+	8.41564e-07	0.0073872	-31.25	AT1G27671	pseudogene,pseudogenic_transcript,pseudogenic_exon;	pseudogene of DRM2/DMT7 (domain rearranged methyltransferase protein)	OK	hypo	OK
Chr3	8654410	8654410	+	5.00213e-07	0.00488247	-50.1075	NONE				hypo	OK
Chr5	26259966	26259966	+	1.02276e-11	3.42461e-07	-44.8052	Chr5	transposable_element,transposon_fragment;			hypo	OK
Chr2	13717364	13717364	+	0	0	-80.1587	AT2G32291	pseudogene,pseudogenic_transcript,pseudogenic_exon;		OK	hypo	#N/A
Chr2	13717373	13717373	+	0	0	-75.7962	AT2G32291	pseudogene,pseudogenic_transcript,pseudogenic_exon;		OK	hypo	#N/A
Chr2	13717376	13717376	+	0	0	-74.2331	AT2G32291	pseudogene,pseudogenic_transcript,pseudogenic_exon;		OK	hypo	#N/A
Chr2	13717367	13717367	+	0	0	-74.1007	AT2G32291	pseudogene,pseudogenic_transcript,pseudogenic_exon;		OK	hypo	#N/A
Chr2	13717358	13717358	+	4.44089e-16	2.93511e-11	-73.5826	AT2G32291	pseudogene,pseudogenic_transcript,pseudogenic_exon;		OK	hypo	#N/A
Chr2	13717344	13717344	+	4.43244e-11	1.35413e-06	-72.2764	AT2G32291	pseudogene,pseudogenic_transcript,pseudogenic_exon;		OK	hypo	#N/A
Chr2	13717353	13717353	+	6.51479e-13	2.69443e-08	-72.0091	AT2G32291	pseudogene,pseudogenic_transcript,pseudogenic_exon;		OK	hypo	#N/A
Chr2	13717381	13717381	+	0	0	-71.123	AT2G32291	pseudogene,pseudogenic_transcript,pseudogenic_exon;		OK	hypo	#N/A
Chr2	13717403	13717403	+	1.66533e-15	1.02372e-10	-66.8421	AT2G32291	pseudogene,pseudogenic_transcript,pseudogenic_exon;		OK	hypo	#N/A
Chr2	13717393	13717393	+	5.44009e-15	3.09052e-10	-64.1414	AT2G32291	pseudogene,pseudogenic_transcript,pseudogenic_exon;		OK	hypo	#N/A
Chr2	13717338	13717338	+	8.68285e-10	2.05386e-05	-64.1026	AT2G32291	pseudogene,pseudogenic_transcript,pseudogenic_exon;		OK	hypo	#N/A
Chr2	13717413	13717413	+	3.40949e-13	1.47972e-08	-63.0208	AT2G32291	pseudogene,pseudogenic_transcript,pseudogenic_exon;		OK	hypo	#N/A
Chr2	13717419	13717419	+	3.18634e-14	1.59115e-09	-61.809	AT2G32291	pseudogene,pseudogenic_transcript,pseudogenic_exon;		OK	hypo	#N/A
Chr1	9630656	9630656	+	1.15972e-09	2.66529e-05	-59.1837	AT1G27671	pseudogene,pseudogenic_transcript,pseudogenic_exon;	pseudogene of DRM2/DMT7 (domain rearranged methyltransferase protein)	OK	hypo	#N/A
Chr1	9630676	9630676	+	9.88866e-11	2.84483e-06	-55.2709	AT1G27671	pseudogene,pseudogenic_transcript,pseudogenic_exon;	pseudogene of DRM2/DMT7 (domain rearranged methyltransferase protein)	OK	hypo	#N/A
Chr1	9630660	9630660	+	6.71505e-08	0.00094763	-51.0989	AT1G27671	pseudogene,pseudogenic_transcript,pseudogenic_exon;	pseudogene of DRM2/DMT7 (domain rearranged methyltransferase protein)	OK	hypo	#N/A
Chr2	13717582	13717582	+	2.77556e-15	1.66569e-10	-50	AT2G32291	pseudogene,pseudogenic_transcript,pseudogenic_exon;		OK	hypo	#N/A
Chr1	9630675	9630675	+	1.05428e-08	0.000192438	-49.5567	AT1G27671	pseudogene,pseudogenic_transcript,pseudogenic_exon;	pseudogene of DRM2/DMT7 (domain rearranged methyltransferase protein)	OK	hypo	#N/A
Chr1	9630683	9630683	+	1.40877e-09	3.16924e-05	-48.7063	AT1G27671	pseudogene,pseudogenic_transcript,pseudogenic_exon;	pseudogene of DRM2/DMT7 (domain rearranged methyltransferase protein)	OK	hypo	#N/A
Chr2	13717440	13717440	+	5.17963e-12	1.84103e-07	-48.374	AT2G32291	pseudogene,pseudogenic_transcript,pseudogenic_exon;		OK	hypo	#N/A
Chr1	9630674	9630674	+	5.36879e-08	0.000785675	-47.2906	AT1G27671	pseudogene,pseudogenic_transcript,pseudogenic_exon;	pseudogene of DRM2/DMT7 (domain rearranged methyltransferase protein)	OK	hypo	#N/A
Chr1	9630662	9630662	+	6.12843e-14	2.91632e-09	-46.7588	AT1G27671	pseudogene,pseudogenic_transcript,pseudogenic_exon;	pseudogene of DRM2/DMT7 (domain rearranged methyltransferase protein)	OK	hypo	#N/A
Chr1	8837269	8837269	+	0	0	-46.2264	AT1G25220	gene,mRNA,three_prime_UTR,exon;	anthranilate synthase beta subunit 1	OK	hypo	#N/A
Chr2	13717594	13717594	+	1.66692e-10	4.58673e-06	-45.4915	AT2G32291	pseudogene,pseudogenic_transcript,pseudogenic_exon;		OK	hypo	#N/A
Chr2	13717436	13717436	+	5.57414e-10	1.36813e-05	-45.4839	AT2G32291	pseudogene,pseudogenic_transcript,pseudogenic_exon;		OK	hypo	#N/A
Chr1	8837245	8837245	+	0	0	-45.4545	AT1G25220	gene,mRNA,three_prime_UTR,exon;	anthranilate synthase beta subunit 1	OK	hypo	#N/A
Chr2	13717554	13717554	+	1.83881e-09	4.02033e-05	-43.7014	AT2G32291	pseudogene,pseudogenic_transcript,pseudogenic_exon;		OK	hypo	#N/A
Chr1	9630682	9630682	+	3.47628e-07	0.00368671	-42.5015	AT1G27671	pseudogene,pseudogenic_transcript,pseudogenic_exon;	pseudogene of DRM2/DMT7 (domain rearranged methyltransferase protein)	OK	hypo	#N/A
Chr2	13717564	13717564	+	8.33696e-11	2.42954e-06	-42.4501	AT2G32291	pseudogene,pseudogenic_transcript,pseudogenic_exon;		OK	hypo	#N/A
Chr1	8837264	8837264	+	4.65294e-13	1.96048e-08	-41.5631	AT1G25220	gene,mRNA,three_prime_UTR,exon;	anthranilate synthase beta subunit 1	OK	hypo	#N/A
Chr5	26259912	26259912	+	3.4407e-07	0.00366628	-41.2202	AT5G65676	transposable_element_gene,mRNA,exon;Chr5		OK	hypo	#N/A
Chr5	26259911	26259911	+	3.4597e-07	0.00367953	-40.864	AT5G65676	transposable_element_gene,mRNA,exon;Chr5		OK	hypo	#N/A
Chr1	9630672	9630672	+	1.3215e-09	2.99624e-05	-39.5646	AT1G27671	pseudogene,pseudogenic_transcript,pseudogenic_exon;	pseudogene of DRM2/DMT7 (domain rearranged methyltransferase protein)	OK	hypo	#N/A
Chr2	13717472	13717472	+	4.81233e-07	0.00475458	-39.5534	AT2G32291	pseudogene,pseudogenic_transcript,pseudogenic_exon;		OK	hypo	#N/A
Chr1	8837250	8837250	+	3.7137e-13	1.60143e-08	-38.709	AT1G25220	gene,mRNA,three_prime_UTR,exon;	anthranilate synthase beta subunit 1	OK	hypo	#N/A
Chr1	8837254	8837254	+	3.3773e-13	1.4689e-08	-38.517	AT1G25220	gene,mRNA,three_prime_UTR,exon;	anthranilate synthase beta subunit 1	OK	hypo	#N/A
Chr1	8837276	8837276	+	3.61866e-12	1.31865e-07	-37.617	AT1G25220	gene,mRNA,three_prime_UTR,exon;	anthranilate synthase beta subunit 1	OK	hypo	#N/A
Chr2	13717452	13717452	+	5.13048e-09	0.000101428	-37.6068	AT2G32291	pseudogene,pseudogenic_transcript,pseudogenic_exon;		OK	hypo	#N/A
Chr1	8837283	8837283	+	4.67404e-14	2.25607e-09	-36.6972	AT1G25220	gene,mRNA,three_prime_UTR,exon;	anthranilate synthase beta subunit 1	OK	hypo	#N/A
Chr2	13717446	13717446	+	4.89577e-07	0.00481117	-36.5638	AT2G32291	pseudogene,pseudogenic_transcript,pseudogenic_exon;		OK	hypo	#N/A
Chr1	8837281	8837281	+	3.14671e-12	1.15082e-07	-35.5983	AT1G25220	gene,mRNA,three_prime_UTR,exon;	anthranilate synthase beta subunit 1	OK	hypo	#N/A
Chr1	9630678	9630678	+	9.4127e-07	0.00805456	-34.5695	AT1G27671	pseudogene,pseudogenic_transcript,pseudogenic_exon;	pseudogene of DRM2/DMT7 (domain rearranged methyltransferase protein)	OK	hypo	#N/A
Chr1	8837288	8837288	+	1.11232e-11	3.71221e-07	-34.0362	AT1G25220	gene,mRNA,three_prime_UTR,exon;	anthranilate synthase beta subunit 1	OK	hypo	#N/A
Chr1	17258462	17258462	+	1.95996e-09	4.22591e-05	-33.1629	AT1G46624	transposable_element_gene,mRNA,exon;Chr1	gypsy-like retrotransposon family, has a 4.3e-213 P-value blast match to GB:AAD11615 prpol (gypsy_Ty3-element) (Zea mays)	OK	hypo	#N/A
Chr4	1747973	1747973	+	7.34671e-07	0.00662723	-30.6534	AT4G03800	transposable_element_gene,mRNA,exon;		OK	hypo	#N/A
Chr1	8837290	8837290	+	2.22129e-11	7.07468e-07	-29.7297	AT1G25220	gene,mRNA,three_prime_UTR,exon;	anthranilate synthase beta subunit 1	OK	hypo	#N/A
Chr5	10361109	10361109	+	3.00454e-10	7.76054e-06	-28.1745	AT5G28415	transposable_element_gene,mRNA,exon;Chr5		OK	hypo	#N/A
Chr1	8837313	8837313	+	3.31605e-10	8.48924e-06	-27.7778	AT1G25220	gene,mRNA,three_prime_UTR,exon;	anthranilate synthase beta subunit 1	OK	hypo	#N/A
Chr5	10361139	10361139	+	5.13169e-07	0.00498354	-26.9002	AT5G28415	transposable_element_gene,mRNA,exon;Chr5		OK	hypo	#N/A
Chr5	26258725	26258725	+	1.23243e-08	0.000220186	-26.6002	AT5G65676	transposable_element_gene,mRNA,exon;Chr5		OK	hypo	#N/A
Chr5	10362364	10362364	+	4.08432e-08	0.000626253	-26.5756	AT5G28415	transposable_element_gene,mRNA,exon;Chr5		OK	hypo	#N/A
Chr3	14702734	14702734	+	5.75214e-07	0.00545654	-26.0296	AT3G42621	transposable_element_gene,mRNA,exon;Chr3		OK	hypo	#N/A
Chr1	10363097	10363097	+	1.93401e-13	8.59651e-09	32.243	AT1G29650	transposable_element_gene,mRNA,exon;Chr1	non-LTR retrotransposon family (LINE), has a 1.5e-28 P-value blast match to GB:NP_038603 L1 repeat, Tf subfamily, member 23 (LINE-element) (Mus musculus)	OK	hyper	#N/A
Chr5	8893324	8893324	+	8.15577e-09	0.00015358	-86.9565	NONE				hypo	#N/A
Chr5	21028136	21028136	+	1.15186e-12	4.52341e-08	-78.5714	AT5G51760	gene,mRNA,protein;			hypo	#N/A
Chr5	8893317	8893317	+	7.24583e-07	0.00655085	-74.0741	NONE				hypo	#N/A
Chr2	6830340	6830340	+	8.19176e-07	0.00723148	-73.75	NONE				hypo	#N/A
Chr5	8893301	8893301	+	1.18805e-07	0.00153433	-70.5882	NONE				hypo	#N/A
Chr5	21028121	21028121	+	9.79439e-12	3.30142e-07	-70.2194	AT5G51760	gene,mRNA,protein;			hypo	#N/A
Chr1	29460865	29460865	+	9.06978e-09	0.000167977	-67.6471	NONE				hypo	#N/A
Chr1	10703048	10703048	+	9.00391e-14	4.18617e-09	-64.9909	NONE				hypo	#N/A
Chr5	21028165	21028165	+	4.18675e-10	1.05186e-05	-64.9123	AT5G51760	gene,mRNA,protein;			hypo	#N/A
Chr5	21028152	21028152	+	1.6658e-08	0.000286721	-63.2168	AT5G51760	gene,mRNA,protein;			hypo	#N/A
Chr1	11564724	11564724	+	4.97966e-07	0.00486759	-62.2642	AT1G32140	gene,mRNA,protein,CDS,exon;	F-box family protein		hypo	#N/A
Chr4	5988130	5988130	+	3.72058e-12	1.35335e-07	-61.5385	AT4G09455	transposable_element_gene,mRNA,exon;Chr4			hypo	#N/A
Chr2	18730164	18730164	+	2.71172e-07	0.00303838	-61.3333	NONE				hypo	#N/A
Chr5	21028107	21028107	+	5.68475e-07	0.00540275	-60.8609	AT5G51760	gene,mRNA,protein;			hypo	#N/A
Chr5	21028158	21028158	+	6.54125e-08	0.00092837	-60.1648	AT5G51760	gene,mRNA,protein;			hypo	#N/A
Chr5	11990756	11990756	+	1.04048e-06	0.00872796	-59.1168	Chr5	transposable_element,transposon_fragment;			hypo	#N/A
Chr1	22357049	22357049	+	1.92069e-14	9.96017e-10	-58.9334	NONE				hypo	#N/A
Chr3	17176721	17176721	+	3.5525e-08	0.000550997	-58.6422	NONE				hypo	#N/A
Chr5	8657116	8657116	+	4.40394e-10	1.10095e-05	-58.5714	NONE				hypo	#N/A
Chr2	16253464	16253464	+	1.00499e-07	0.00132672	-58.4314	NONE				hypo	#N/A
Chr3	15912327	15912327	+	9.99564e-07	0.00845486	-58.3333	NONE				hypo	#N/A
Chr1	29460856	29460856	+	5.08919e-08	0.000752805	-58.0645	NONE				hypo	#N/A
Chr1	13522015	13522015	+	8.73073e-07	0.00761001	-57.8947	Chr1	transposable_element,transposon_fragment;			hypo	#N/A
Chr5	21028099	21028099	+	2.67364e-08	0.000429149	-57.0186	AT5G51760	gene,mRNA,protein;			hypo	#N/A
Chr3	5986743	5986743	+	1.2765e-10	3.5906e-06	-56.9703	AT3G17500	gene,mRNA,protein,exon,CDS;			hypo	#N/A
Chr1	18282214	18282214	+	2.8713e-07	0.00318892	-56.7154	NONE				hypo	#N/A
Chr3	8654433	8654433	+	4.52959e-07	0.0045418	-56.6667	NONE				hypo	#N/A
Chr5	12312833	12312833	+	1.23812e-07	0.00158885	-56.2092	AT5G32630	transposable_element_gene,mRNA,exon;Chr5			hypo	#N/A
Chr1	10703052	10703052	+	3.63082e-09	7.48533e-05	-55.942	NONE				hypo	#N/A
Chr2	1002213	1002213	+	3.24002e-07	0.00349666	-55.5556	Chr2	transposable_element,transposon_fragment;			hypo	#N/A
Chr3	15880963	15880963	+	2.56519e-07	0.00291293	-55.4531	NONE				hypo	#N/A
Chr1	6960077	6960077	+	2.35313e-09	5.00426e-05	-54.5455	NONE				hypo	#N/A
Chr1	10703012	10703012	+	4.56837e-08	0.000688981	-54.251	Chr1	transposable_element,transposon_fragment;			hypo	#N/A
Chr4	1901738	1901738	+	9.08022e-07	0.00781787	-53.75	Chr4	transposable_element,transposon_fragment;			hypo	#N/A
Chr1	29460839	29460839	+	5.33791e-07	0.00513011	-53.5714	NONE				hypo	#N/A
Chr1	22357042	22357042	+	7.51066e-13	3.05017e-08	-53.5131	NONE				hypo	#N/A
Chr5	8204334	8204334	+	3.28961e-08	0.000513352	-53.2217	AT5G24200	gene,mRNA,protein,exon,CDS;			hypo	#N/A
Chr1	10703042	10703042	+	1.50685e-08	0.000261814	-53.1977	NONE				hypo	#N/A
Chr1	10703024	10703024	+	6.44313e-08	0.00091573	-52.987	NONE				hypo	#N/A
Chr4	5988099	5988099	+	1.46644e-09	3.28438e-05	-52.809	AT4G09455	transposable_element_gene,mRNA,exon;Chr4			hypo	#N/A
Chr3	5986761	5986761	+	3.66243e-11	1.13431e-06	-50.2302	AT3G17500	gene,mRNA,protein,exon,CDS;			hypo	#N/A
Chr1	6960084	6960084	+	5.93833e-08	0.000852976	-50	NONE				hypo	#N/A
Chr1	26395141	26395141	+	8.25232e-09	0.000154786	-50	AT1G70080	gene,mRNA,protein;			hypo	#N/A
Chr1	26395160	26395160	+	9.64471e-09	0.000177577	-50	AT1G70080	gene,mRNA,protein,CDS,exon;			hypo	#N/A
Chr4	5988428	5988428	+	7.95047e-07	0.00707405	-50	AT4G09455	transposable_element_gene,mRNA,exon;Chr4			hypo	#N/A
Chr5	8657100	8657100	+	5.49306e-08	0.000800387	-49.8537	NONE				hypo	#N/A
Chr1	21249866	21249866	+	1.44209e-07	0.00180927	-49.8389	NONE				hypo	#N/A
Chr3	11097346	11097346	+	1.90314e-07	0.00229379	-49.359	Chr3	transposable_element,transposon_fragment;			hypo	#N/A
Chr1	22357040	22357040	+	2.62555e-10	6.90507e-06	-49.3564	NONE				hypo	#N/A
Chr1	15987244	15987244	+	2.65943e-09	5.59099e-05	-49.2537	NONE				hypo	#N/A
Chr3	11097353	11097353	+	1.11131e-06	0.00918118	-48.9362	Chr3	transposable_element,transposon_fragment;			hypo	#N/A
Chr3	11097354	11097354	+	9.61851e-07	0.00819412	-48.9362	Chr3	transposable_element,transposon_fragment;			hypo	#N/A
Chr1	8515426	8515426	+	1.29052e-12	5.04836e-08	-48.9087	Chr1	transposable_element,transposon_fragment;			hypo	#N/A
Chr5	26259965	26259965	+	1.82077e-14	9.49068e-10	-48.5553	Chr5	transposable_element,transposon_fragment;			hypo	#N/A
Chr1	6959995	6959995	+	7.48229e-07	0.00671659	-48.4848	NONE				hypo	#N/A
Chr4	5314585	5314585	+	0	0	-48.2965	NONE				hypo	#N/A
Chr5	12662400	12662400	+	4.012e-11	1.23689e-06	-48.2759	AT5G33390	gene,mRNA,protein,exon,CDS;			hypo	#N/A
Chr1	26395161	26395161	+	1.51047e-08	0.000262217	-48.1481	AT1G70080	gene,mRNA,protein,CDS,exon;			hypo	#N/A
Chr5	26259981	26259981	+	4.41536e-13	1.87995e-08	-47.5683	Chr5	transposable_element,transposon_fragment;			hypo	#N/A
Chr1	22357043	22357043	+	4.91872e-10	1.22059e-05	-47.0925	NONE				hypo	#N/A
Chr1	14473364	14473364	+	1.18164e-06	0.0096014	-47.0588	NONE				hypo	#N/A
Chr3	4373044	4373044	+	1.1551e-06	0.00943504	-46.8673	NONE				hypo	#N/A
Chr3	11097325	11097325	+	1.3931e-08	0.000245823	-46.7532	Chr3	transposable_element,transposon_fragment;			hypo	#N/A
Chr1	26395142	26395142	+	5.65239e-08	0.000820057	-46.4286	AT1G70080	gene,mRNA,protein;			hypo	#N/A
Chr1	26395164	26395164	+	4.79924e-08	0.000717381	-46.2963	AT1G70080	gene,mRNA,protein,CDS,exon;			hypo	#N/A
Chr3	5986764	5986764	+	2.98702e-10	7.72514e-06	-46.2516	AT3G17500	gene,mRNA,protein,exon,CDS;			hypo	#N/A
Chr1	6960011	6960011	+	3.46384e-07	0.00367953	-46.1538	NONE				hypo	#N/A
Chr3	11097338	11097338	+	1.10324e-07	0.00144323	-46.0775	Chr3	transposable_element,transposon_fragment;			hypo	#N/A
Chr1	6960054	6960054	+	4.9786e-07	0.00486759	-45.4545	NONE				hypo	#N/A
Chr3	5986737	5986737	+	1.72983e-07	0.002119	-45.2273	AT3G17500	gene,mRNA,protein,exon,CDS;			hypo	#N/A
Chr4	5987904	5987904	+	1.59595e-09	3.54693e-05	-45.1613	AT4G09455	transposable_element_gene,mRNA,exon;Chr4			hypo	#N/A
Chr1	24506662	24506662	+	1.09207e-10	3.10639e-06	-44.9723	NONE				hypo	#N/A
Chr4	4250617	4250617	+	2.73655e-07	0.00306426	-44.6617	NONE				hypo	#N/A
Chr3	11502205	11502205	+	4.16478e-10	1.04894e-05	-44.6615	Chr3	transposable_element,transposon_fragment;			hypo	#N/A
Chr4	1707946	1707946	+	1.20745e-06	0.00976019	-44.6581	NONE				hypo	#N/A
Chr4	3168785	3168785	+	6.04521e-07	0.00567597	-44.3137	AT4G06503	transposable_element_gene,mRNA,exon;Chr4			hypo	#N/A
Chr3	17176760	17176760	+	1.0904e-08	0.000198138	-44.2567	NONE				hypo	#N/A
Chr3	5986740	5986740	+	1.95741e-07	0.00234383	-44.1192	AT3G17500	gene,mRNA,protein,exon,CDS;			hypo	#N/A
Chr2	8939527	8939527	+	1.18886e-06	0.00964459	-43.6594	NONE				hypo	#N/A
Chr2	3673409	3673409	+	3.71526e-07	0.00388515	-43.6508	NONE				hypo	#N/A
Chr4	2714203	2714203	+	6.83099e-07	0.00623995	-43.5957	NONE				hypo	#N/A
Chr3	15482687	15482687	+	8.74453e-07	0.00761312	-43.5897	NONE				hypo	#N/A
Chr1	8515435	8515435	+	2.77307e-09	5.82383e-05	-43.3704	Chr1	transposable_element,transposon_fragment;			hypo	#N/A
Chr1	640766	640766	+	6.16503e-08	0.000881781	-43.2351	Chr1	transposable_element,transposon_fragment;			hypo	#N/A
Chr5	8657094	8657094	+	1.07448e-06	0.00894633	-42.9397	NONE				hypo	#N/A
Chr5	11500877	11500877	+	4.11319e-07	0.00420347	-42.775	NONE				hypo	#N/A
Chr4	2802785	2802785	+	1.21542e-07	0.00156369	-42.7206	Chr4	transposable_element,transposon_fragment;			hypo	#N/A
Chr3	17176796	17176796	+	8.3156e-07	0.00731208	-42.5599	NONE				hypo	#N/A
Chr2	2170091	2170091	+	3.70137e-07	0.00387463	-42.4036	AT2G05752	gene,mRNA,protein,CDS,exon;			hypo	#N/A
Chr3	5986768	5986768	+	8.21104e-09	0.000154334	-42.3527	AT3G17500	gene,mRNA,protein,exon,CDS;			hypo	#N/A
Chr5	17601905	17601905	+	1.79921e-07	0.00218414	-42.2675	AT5G43800	transposable_element_gene,mRNA,exon;Chr5			hypo	#N/A
Chr1	22357048	22357048	+	2.02246e-07	0.00241031	-42.2551	NONE				hypo	#N/A
Chr1	13155797	13155797	+	7.35061e-07	0.0066278	-42.1569	Chr1	transposable_element,transposon_fragment;			hypo	#N/A
Chr4	3481314	3481314	+	7.52783e-08	0.0010478	-42.0478	AT4G06558	transposable_element_gene,mRNA,exon;Chr4			hypo	#N/A
Chr3	12944733	12944733	+	1.06241e-06	0.00887539	-41.6928	AT3G31945	transposable_element_gene,mRNA,exon;Chr3			hypo	#N/A
Chr2	8092171	8092171	+	9.81697e-07	0.00832834	-41.6843	NONE				hypo	#N/A
Chr4	4975795	4975795	+	7.82759e-07	0.00698624	-41.6667	AT4G08090	transposable_element_gene,mRNA,exon;			hypo	#N/A
Chr5	8893357	8893357	+	2.50058e-07	0.0028556	-41.6667	NONE				hypo	#N/A
Chr3	11097314	11097314	+	5.56162e-08	0.000808813	-41.5873	Chr3	transposable_element,transposon_fragment;			hypo	#N/A
Chr4	5988818	5988818	+	6.90267e-10	1.67188e-05	-41.5789	AT4G09455	transposable_element_gene,mRNA,exon;Chr4			hypo	#N/A
Chr1	24506658	24506658	+	4.82937e-07	0.00476033	-41.4923	NONE				hypo	#N/A
Chr4	1063889	1063889	+	0	0	-41.4634	NONE				hypo	#N/A
Chr3	12890033	12890033	+	6.50244e-07	0.00600492	-41.2955	AT3G31904	transposable_element_gene,mRNA,exon;Chr3			hypo	#N/A
Chr1	22357047	22357047	+	3.44266e-07	0.00366643	-40.9091	NONE				hypo	#N/A
Chr4	1063890	1063890	+	0	0	-40.898	NONE				hypo	#N/A
Chr2	8092165	8092165	+	4.35657e-07	0.00439445	-40.8476	NONE				hypo	#N/A
Chr3	9394138	9394138	+	2.5181e-12	9.37881e-08	-40.6178	AT3G25727	gene,mRNA,protein,CDS,exon;			hypo	#N/A
Chr3	5986780	5986780	+	8.1248e-11	2.37455e-06	-40.3339	AT3G17500	gene,mRNA,protein,exon,CDS;			hypo	#N/A
Chr5	26259992	26259992	+	9.00317e-08	0.00121551	-40.3175	Chr5	transposable_element,transposon_fragment;			hypo	#N/A
Chr3	8654441	8654441	+	7.57584e-08	0.00105087	-39.9889	NONE				hypo	#N/A
Chr5	26259994	26259994	+	3.94585e-10	9.98779e-06	-39.1713	Chr5	transposable_element,transposon_fragment;			hypo	#N/A
Chr1	6960040	6960040	+	1.04125e-06	0.0087292	-39.0244	NONE				hypo	#N/A
Chr4	5988846	5988846	+	1.58068e-07	0.00196004	-39.0054	AT4G09455	transposable_element_gene,mRNA,exon;Chr4			hypo	#N/A
Chr1	12740400	12740400	+	1.15e-07	0.00149474	-39.0046	NONE				hypo	#N/A
Chr2	8092163	8092163	+	2.03209e-07	0.00242036	-38.9831	NONE				hypo	#N/A
Chr3	9394175	9394175	+	9.24326e-10	2.17119e-05	-38.973	AT3G25727	gene,mRNA,protein,CDS,exon;			hypo	#N/A
Chr4	5314573	5314573	+	6.33704e-12	2.21735e-07	-38.9417	NONE				hypo	#N/A
Chr5	11636470	11636470	+	5.82941e-08	0.000840913	-38.6302	AT5G30520	gene,mRNA,protein;			hypo	#N/A
Chr1	22357058	22357058	+	1.18128e-08	0.000211609	-38.5557	NONE				hypo	#N/A
Chr5	15601417	15601417	+	1.65522e-07	0.00203748	-38.3988	Chr5	transposable_element,transposon_fragment;			hypo	#N/A
Chr2	10709440	10709440	+	3.14978e-09	6.60128e-05	-38.3165	AT2G25160	gene,mRNA,protein,CDS,exon;			hypo	#N/A
Chr1	21617407	21617407	+	1.95465e-07	0.00234331	-38.2793	NONE				hypo	#N/A
Chr3	557832	557832	+	1.04361e-14	5.62836e-10	-37.9577	NONE				hypo	#N/A
Chr4	1063879	1063879	+	3.87357e-13	1.66328e-08	-37.7977	NONE				hypo	#N/A
Chr3	5986773	5986773	+	4.96763e-08	0.000739273	-37.6335	AT3G17500	gene,mRNA,protein,exon,CDS;			hypo	#N/A
Chr4	14398224	14398224	+	1.57794e-08	0.000272993	-37.5798	AT4G29200	gene,mRNA,protein,CDS,exon;			hypo	#N/A
Chr4	1063871	1063871	+	5.4512e-14	2.61249e-09	-36.9619	NONE				hypo	#N/A
Chr3	557834	557834	+	1.13243e-13	5.19334e-09	-36.9347	NONE				hypo	#N/A
Chr5	11057088	11057088	+	4.4519e-09	8.91455e-05	-36.5448	Chr5	transposable_element,transposon_fragment;			hypo	#N/A
Chr1	22357057	22357057	+	4.69268e-07	0.004666	-36.0039	NONE				hypo	#N/A
Chr3	12946614	12946614	+	1.76943e-08	0.000301811	-35.9073	AT3G31945	transposable_element_gene,mRNA,exon;Chr3			hypo	#N/A
Chr3	9394012	9394012	+	1.10128e-07	0.0014416	-35.7827	AT3G25727	gene,mRNA,protein;			hypo	#N/A
Chr3	13830639	13830639	+	2.54952e-07	0.00289677	-35.7612	AT3G33100	transposable_element_gene,mRNA,exon;Chr3			hypo	#N/A
Chr3	13511977	13511977	+	1.21301e-07	0.00156157	-35.7478	AT3G32966	transposable_element_gene,mRNA,exon;Chr3			hypo	#N/A
Chr1	8515420	8515420	+	2.69562e-13	1.18516e-08	-35.7009	Chr1	transposable_element,transposon_fragment;			hypo	#N/A
Chr3	7041351	7041351	+	8.43769e-15	4.64978e-10	-35.6923	Chr3	transposable_element,transposon_fragment;			hypo	#N/A
Chr2	4792202	4792202	+	2.94512e-10	7.62653e-06	-35.6659	NONE				hypo	#N/A
Chr4	5988812	5988812	+	1.14241e-07	0.00148773	-35.5538	AT4G09455	transposable_element_gene,mRNA,exon;Chr4			hypo	#N/A
Chr3	557837	557837	+	9.53237e-13	3.79501e-08	-35.5067	NONE				hypo	#N/A
Chr5	11074617	11074617	+	1.50729e-07	0.00187825	-35.4118	Chr5	transposable_element,transposon_fragment;			hypo	#N/A
Chr1	13199437	13199437	+	1.89391e-07	0.00228539	-35.3945	AT1G35663	transposable_element_gene,mRNA;Chr1	similar to DNA binding / transposase [Arabidopsis thaliana] (TAIR:AT4G04635.1)		hypo	#N/A
Chr2	3919430	3919430	+	2.96334e-08	0.000469316	-35.2941	AT2G10240	transposable_element_gene,mRNA,exon;Chr2			hypo	#N/A
Chr4	5314578	5314578	+	5.17266e-11	1.56608e-06	-35.1523	NONE				hypo	#N/A
Chr4	1063873	1063873	+	2.88458e-12	1.06071e-07	-35.115	NONE				hypo	#N/A
Chr3	13385272	13385272	+	7.93544e-09	0.00014985	-35.1073	AT3G32445	pseudogene,pseudogenic_transcript,pseudogenic_exon;			hypo	#N/A
Chr4	5314561	5314561	+	5.74516e-09	0.000112155	-34.8528	NONE				hypo	#N/A
Chr4	5987892	5987892	+	9.79769e-08	0.00129947	-34.7222	AT4G09455	transposable_element_gene,mRNA,exon;Chr4			hypo	#N/A
Chr3	7041339	7041339	+	1.65492e-11	5.36374e-07	-34.7018	Chr3	transposable_element,transposon_fragment;			hypo	#N/A
Chr3	9393987	9393987	+	2.67431e-07	0.00301048	-34.5291	AT3G25727	gene,mRNA,protein;			hypo	#N/A
Chr2	8560633	8560633	+	1.38495e-08	0.000244627	-34.3025	Chr2	transposable_element,transposon_fragment;			hypo	#N/A
Chr2	6622804	6622804	+	9.01041e-07	0.00778694	-33.926	AT2G15250	transposable_element_gene,mRNA,exon;Chr2			hypo	#N/A
Chr3	557816	557816	+	3.55138e-12	1.29647e-07	-33.8932	NONE				hypo	#N/A
Chr2	3233929	3233929	+	1.04221e-06	0.00873154	-33.8889	NONE				hypo	#N/A
Chr2	6029806	6029806	+	7.73575e-10	1.85808e-05	-33.7704	AT2G14240	transposable_element_gene,mRNA,exon;Chr2			hypo	#N/A
Chr3	557826	557826	+	1.60062e-11	5.21281e-07	-33.6891	NONE				hypo	#N/A
Chr4	1063868	1063868	+	7.37868e-11	2.17218e-06	-33.6789	NONE				hypo	#N/A
Chr1	22357064	22357064	+	3.93103e-07	0.00406247	-33.6264	NONE				hypo	#N/A
Chr5	10626763	10626763	+	8.94095e-09	0.000165895	-33.398	AT5G28624	transposable_element_gene,mRNA,exon;Chr5			hypo	#N/A
Chr3	9394099	9394099	+	9.7985e-08	0.00129947	-33.324	AT3G25727	gene,mRNA,protein;			hypo	#N/A
Chr3	14976938	14976938	+	4.31028e-08	0.00065741	-33.2832	AT3G42910	transposable_element_gene,mRNA,exon;			hypo	#N/A
Chr5	13933586	13933586	+	2.19848e-08	0.000363258	-33.0556	NONE				hypo	#N/A
Chr3	13240121	13240121	+	5.48356e-08	0.000800156	-32.9505	AT3G32280	gene,mRNA,protein,exon,CDS;			hypo	#N/A
Chr4	5314754	5314754	+	4.83813e-12	1.7349e-07	-32.8854	NONE				hypo	#N/A
Chr2	1973928	1973928	+	2.77547e-08	0.000442683	-32.8453	AT2G05390	transposable_element_gene,mRNA,exon;Chr2			hypo	#N/A
Chr2	796122	796122	+	2.51215e-07	0.00286137	-32.5862	AT2G02795	gene,mRNA,protein,exon,CDS;AT2G02800			hypo	#N/A
Chr3	22767618	22767618	+	7.38298e-13	3.01649e-08	-32.5558	Chr3	transposable_element,transposon_fragment;			hypo	#N/A
Chr3	13010743	13010743	+	1.02181e-08	0.000187187	-32.5215	AT3G32026	transposable_element_gene,mRNA,exon;Chr3			hypo	#N/A
Chr3	15033753	15033753	+	4.82991e-07	0.00476033	-32.5068	AT3G42993	transposable_element_gene,mRNA,exon;Chr3			hypo	#N/A
Chr4	1063888	1063888	+	1.31777e-09	2.99115e-05	-32.4649	NONE				hypo	#N/A
Chr3	13452223	13452223	+	3.27416e-08	0.000511334	-32.4055	AT3G32904	gene,mRNA,protein;			hypo	#N/A
Chr5	8505377	8505377	+	1.24631e-07	0.00159645	-32.3973	AT5G24775	transposable_element_gene,mRNA,exon;			hypo	#N/A
Chr2	4292239	4292239	+	2.92212e-07	0.00323471	-32.3709	AT2G10895	transposable_element_gene,mRNA,exon;Chr2			hypo	#N/A
Chr3	14764385	14764385	+	4.90519e-07	0.00481574	-32.3264	NONE				hypo	#N/A
Chr4	2763252	2763252	+	4.10727e-07	0.00420166	-32.2342	NONE				hypo	#N/A
Chr5	6789437	6789437	+	7.46369e-08	0.0010407	-32.2034	NONE				hypo	#N/A
Chr2	10732721	10732721	+	3.52755e-07	0.00372935	-32	NONE				hypo	#N/A
Chr3	15859775	15859775	+	4.29937e-07	0.0043476	-31.8902	AT3G44096	transposable_element_gene,mRNA,exon;Chr3			hypo	#N/A
Chr2	3885275	3885275	+	3.60493e-07	0.00380122	-31.8867	AT2G10200	transposable_element_gene,mRNA,exon;Chr2			hypo	#N/A
Chr3	12994464	12994464	+	1.9486e-07	0.00234022	-31.8669	NONE				hypo	#N/A
Chr5	13933226	13933226	+	7.23195e-11	2.13209e-06	-31.6336	NONE				hypo	#N/A
Chr2	3841747	3841747	+	8.11064e-07	0.00718811	-31.6315	Chr2	transposable_element,transposon_fragment;			hypo	#N/A
Chr4	1742567	1742567	+	2.51271e-07	0.00286137	-31.2447	Chr4	transposable_element,transposon_fragment;			hypo	#N/A
Chr5	8204332	8204332	+	2.28846e-08	0.00037702	-31.1917	AT5G24200	gene,mRNA,protein,exon,CDS;			hypo	#N/A
Chr5	12958914	12958914	+	7.8696e-07	0.00701445	-31.1442	AT5G34770	transposable_element_gene,mRNA,exon;Chr5			hypo	#N/A
Chr3	557815	557815	+	7.5135e-11	2.20866e-06	-31.1037	NONE				hypo	#N/A
Chr1	17714019	17714019	+	1.41406e-08	0.000248899	-31.0565	Chr1	transposable_element,transposon_fragment;			hypo	#N/A
Chr1	9812120	9812120	+	1.64283e-10	4.53277e-06	-31.018	NONE				hypo	#N/A
Chr1	10545404	10545404	+	3.45979e-09	7.19137e-05	-30.9687	AT1G30060	gene,mRNA,protein,CDS,exon;	COP1-interacting protein-related		hypo	#N/A
Chr5	22165227	22165227	+	2.8304e-12	1.04268e-07	-30.8394	NONE				hypo	#N/A
Chr1	17961610	17961610	+	5.84898e-11	1.75507e-06	-30.7368	NONE				hypo	#N/A
Chr3	12712772	12712772	+	7.99041e-07	0.00710022	-30.7101	Chr3	transposable_element,transposon_fragment;			hypo	#N/A
Chr4	379119	379119	+	1.21039e-10	3.42368e-06	-30.6324	NONE				hypo	#N/A
Chr4	10112350	10112350	+	7.17426e-13	2.94908e-08	-30.6029	NONE				hypo	#N/A
Chr2	6029787	6029787	+	1.31365e-10	3.68485e-06	-30.597	AT2G14240	transposable_element_gene,mRNA,exon;Chr2			hypo	#N/A
Chr4	1767685	1767685	+	2.39365e-07	0.00274901	-30.5856	AT4G03816	transposable_element_gene,mRNA,exon;Chr4			hypo	#N/A
Chr4	3368981	3368981	+	2.92704e-10	7.59917e-06	-30.5173	Chr4	transposable_element,transposon_fragment;			hypo	#N/A
Chr1	8515414	8515414	+	1.09983e-08	0.000199431	-30.5147	Chr1	transposable_element,transposon_fragment;			hypo	#N/A
Chr5	13353355	13353355	+	1.10109e-06	0.00911913	-30.4767	NONE				hypo	#N/A
Chr3	15350906	15350906	+	1.59029e-07	0.00196714	-30.3793	AT3G43425	transposable_element_gene,mRNA,exon;Chr3			hypo	#N/A
Chr3	16887804	16887804	+	4.91925e-08	0.000733693	-30.3199	AT3G45940	gene,mRNA,protein,CDS,exon;			hypo	#N/A
Chr2	6029735	6029735	+	8.54872e-15	4.69816e-10	-30.2794	Chr2	transposable_element,transposon_fragment;			hypo	#N/A
Chr4	4472294	4472294	+	1.49521e-07	0.00186665	-30.2648	AT4G07685	transposable_element_gene,mRNA,exon;Chr4			hypo	#N/A
Chr4	379125	379125	+	8.05532e-10	1.92115e-05	-30.2419	NONE				hypo	#N/A
Chr5	8506153	8506153	+	5.31396e-10	1.31063e-05	-30.235	AT5G24775	transposable_element_gene,mRNA,exon;			hypo	#N/A
Chr5	11991923	11991923	+	2.92613e-07	0.0032356	-30.2321	Chr5	transposable_element,transposon_fragment;			hypo	#N/A
Chr2	5157809	5157809	+	2.16246e-10	5.81711e-06	-30.1772	AT2G12640	transposable_element_gene,mRNA,exon;Chr2			hypo	#N/A
Chr2	9382371	9382371	+	8.37123e-08	0.00114009	-30.1309	Chr2	transposable_element,transposon_fragment;			hypo	#N/A
Chr3	14432069	14432069	+	3.2722e-08	0.000511334	-30.1282	AT3G42256	transposable_element_gene,mRNA,exon;Chr3			hypo	#N/A
Chr2	9382358	9382358	+	6.24852e-07	0.00581825	-30.0938	Chr2	transposable_element,transposon_fragment;			hypo	#N/A
Chr1	8515410	8515410	+	7.23166e-09	0.000137458	-30.0858	Chr1	transposable_element,transposon_fragment;			hypo	#N/A
Chr1	24250900	24250900	+	3.07638e-07	0.00335045	-29.9633	NONE				hypo	#N/A
Chr3	9394165	9394165	+	3.24836e-10	8.34765e-06	-29.9583	AT3G25727	gene,mRNA,protein,CDS,exon;			hypo	#N/A
Chr5	11286415	11286415	+	8.17456e-08	0.00111973	-29.9516	AT5G29624	gene,mRNA,protein,exon,CDS;			hypo	#N/A
Chr4	4116714	4116714	+	4.57004e-09	9.124e-05	-29.9201	AT4G07320	pseudogene,pseudogenic_transcript,pseudogenic_exon;			hypo	#N/A
Chr3	16377715	16377715	+	5.84675e-08	0.000842814	-29.917	Chr3	transposable_element,transposon_fragment;			hypo	#N/A
Chr4	5988338	5988338	+	1.06892e-08	0.000194759	-29.8969	AT4G09455	transposable_element_gene,mRNA,exon;Chr4			hypo	#N/A
Chr5	2353396	2353396	+	6.30449e-08	0.000898494	-29.8039	AT5G07430	gene,mRNA,protein,exon,CDS;			hypo	#N/A
Chr5	14088226	14088226	+	1.88858e-09	4.1026e-05	-29.7823	AT5G35935	transposable_element_gene,mRNA,exon;Chr5			hypo	#N/A
Chr3	12796115	12796115	+	5.17832e-07	0.00500852	-29.6563	AT3G31430	gene,mRNA,protein,CDS,exon;			hypo	#N/A
Chr4	4264144	4264144	+	5.25002e-08	0.000773841	-29.6369	AT4G07470	transposable_element_gene,mRNA;Chr4			hypo	#N/A
Chr1	22357251	22357251	+	5.91964e-09	0.000115116	-29.584	AT1G60720	gene,mRNA,protein,exon,CDS;			hypo	#N/A
Chr2	9382372	9382372	+	5.93688e-08	0.000852976	-29.5355	Chr2	transposable_element,transposon_fragment;			hypo	#N/A
Chr3	14504198	14504198	+	6.51217e-07	0.00600842	-29.4545	AT3G42383	transposable_element_gene,mRNA,exon;Chr3			hypo	#N/A
Chr4	4280994	4280994	+	2.31779e-07	0.00268717	-29.4462	AT4G07492	transposable_element_gene,mRNA,exon;Chr4			hypo	#N/A
Chr1	12425015	12425015	+	4.86954e-07	0.00479238	-29.3651	NONE				hypo	#N/A
Chr3	12741214	12741214	+	6.32711e-07	0.00587101	-29.3532	Chr3	transposable_element,transposon_fragment;			hypo	#N/A
Chr1	17961602	17961602	+	1.32871e-12	5.18773e-08	-29.3455	NONE				hypo	#N/A
Chr2	5445767	5445767	+	2.66352e-07	0.00300435	-29.3455	NONE				hypo	#N/A
Chr3	9394052	9394052	+	8.755e-09	0.000163193	-29.3067	AT3G25727	gene,mRNA,protein;			hypo	#N/A
Chr5	11910777	11910777	+	1.44113e-07	0.00180919	-29.3058	AT5G32254	transposable_element_gene,mRNA,exon;Chr5			hypo	#N/A
Chr3	17205314	17205314	+	6.40663e-07	0.00593541	-29.2279	NONE				hypo	#N/A
Chr5	11522673	11522673	+	1.04542e-06	0.00875001	-29.2003	Chr5	transposable_element,transposon_fragment;			hypo	#N/A
Chr2	9947439	9947439	+	1.7126e-07	0.00210299	-29.1735	NONE				hypo	#N/A
Chr5	10906922	10906922	+	8.15209e-07	0.00721536	-29.1353	AT5G28892	transposable_element_gene,mRNA,exon;Chr5			hypo	#N/A
Chr4	5988042	5988042	+	2.9379e-07	0.00324153	-29.1262	AT4G09455	transposable_element_gene,mRNA,exon;Chr4			hypo	#N/A
Chr5	12968104	12968104	+	3.4686e-07	0.00368049	-29.1003	AT5G34790	transposable_element_gene,mRNA,exon;Chr5			hypo	#N/A
Chr3	15409638	15409638	+	6.75463e-07	0.00617922	-29.044	AT3G43521	transposable_element_gene,mRNA,exon;Chr3			hypo	#N/A
Chr3	11121963	11121963	+	2.73784e-07	0.00306426	-29.024	Chr3	transposable_element,transposon_fragment;			hypo	#N/A
Chr4	3168008	3168008	+	6.12333e-07	0.0057254	-29.0054	AT4G06502	transposable_element_gene,mRNA,exon;Chr4			hypo	#N/A
Chr5	12369013	12369013	+	6.71378e-07	0.00615233	-28.9894	AT5G32690	pseudogene,pseudogenic_transcript;AT5G32875	transposable_element,transposon_fragment;		hypo	#N/A
Chr3	13053457	13053457	+	2.42101e-11	7.68656e-07	-28.9702	AT3G32043	transposable_element_gene,mRNA,exon;			hypo	#N/A
Chr3	9394155	9394155	+	4.0701e-07	0.00417251	-28.9061	AT3G25727	gene,mRNA,protein,CDS,exon;			hypo	#N/A
Chr2	4250293	4250293	+	1.02736e-06	0.00865737	-28.7967	Chr2	transposable_element,transposon_fragment;			hypo	#N/A
Chr3	5986786	5986786	+	7.20092e-07	0.00653067	-28.7526	AT3G17500	gene,mRNA,protein,exon,CDS;			hypo	#N/A
Chr4	5988315	5988315	+	1.77483e-07	0.00215974	-28.75	AT4G09455	transposable_element_gene,mRNA,exon;Chr4			hypo	#N/A
Chr5	12437728	12437728	+	8.65719e-07	0.00755986	-28.7423	Chr5	transposable_element,transposon_fragment;			hypo	#N/A
Chr4	2835322	2835322	+	1.32909e-11	4.39804e-07	-28.7248	AT4G05556	transposable_element_gene,mRNA,exon;Chr4			hypo	#N/A
Chr3	11631768	11631768	+	6.56431e-07	0.0060455	-28.714	NONE				hypo	#N/A
Chr5	14086297	14086297	+	8.8241e-08	0.00119452	-28.69	AT5G35935	transposable_element_gene,mRNA,exon;Chr5			hypo	#N/A
Chr3	15102975	15102975	+	4.16951e-07	0.00424815	-28.6535	AT3G43126	transposable_element_gene,mRNA,exon;Chr3			hypo	#N/A
Chr5	26258418	26258418	+	1.44873e-08	0.000253677	-28.5839	Chr5	transposable_element,transposon_fragment;			hypo	#N/A
Chr5	11235288	11235288	+	8.517e-07	0.00746321	-28.5714	NONE				hypo	#N/A
Chr4	3387087	3387087	+	1.05563e-06	0.00882577	-28.3966	Chr4	transposable_element,transposon_fragment;			hypo	#N/A
Chr5	22165220	22165220	+	5.15699e-13	2.15935e-08	-28.3517	NONE				hypo	#N/A
Chr3	12995224	12995224	+	1.8687e-08	0.000315997	-28.34	AT3G32021	transposable_element_gene,mRNA,exon;Chr3			hypo	#N/A
Chr4	1627045	1627045	+	2.20088e-07	0.00259028	-28.3164	AT4G03670	transposable_element_gene,mRNA;Chr4			hypo	#N/A
Chr3	14013333	14013333	+	5.18283e-07	0.00501049	-28.3069	NONE				hypo	#N/A
Chr5	26260012	26260012	+	1.0376e-06	0.00871103	-28.2609	Chr5	transposable_element,transposon_fragment;			hypo	#N/A
Chr5	1559845	1559845	+	5.57362e-11	1.67742e-06	-28.2115	AT5G05260	gene,mRNA,protein,CDS,exon;			hypo	#N/A
Chr4	5988063	5988063	+	6.17528e-07	0.00576598	-28.1553	AT4G09455	transposable_element_gene,mRNA,exon;Chr4			hypo	#N/A
Chr4	14398242	14398242	+	3.5793e-08	0.00055428	-28.0807	AT4G29200	gene,mRNA,protein,CDS,exon;			hypo	#N/A
Chr1	9812102	9812102	+	1.08962e-09	2.52427e-05	-28.0588	NONE				hypo	#N/A
Chr5	12969752	12969752	+	6.69392e-07	0.0061397	-28.0585	AT5G34795	pseudogene,pseudogenic_transcript,pseudogenic_exon;			hypo	#N/A
Chr3	13169991	13169991	+	2.53051e-07	0.00287841	-28.0027	AT3G32195	transposable_element_gene,mRNA,exon;Chr3			hypo	#N/A
Chr1	9812112	9812112	+	2.19225e-08	0.000362526	-28.0002	NONE				hypo	#N/A
Chr4	379116	379116	+	8.98926e-08	0.00121444	-27.9742	NONE				hypo	#N/A
Chr3	22790358	22790358	+	8.88937e-07	0.00771596	-27.9644	NONE				hypo	#N/A
Chr4	3669320	3669320	+	7.00528e-07	0.00638186	-27.963	NONE				hypo	#N/A
Chr2	5433381	5433381	+	9.46451e-07	0.00808677	-27.9426	NONE				hypo	#N/A
Chr2	3179080	3179080	+	1.18508e-07	0.00153245	-27.9409	AT2G07570	transposable_element_gene,mRNA,exon;			hypo	#N/A
Chr4	1063866	1063866	+	5.65127e-08	0.000820057	-27.9395	NONE				hypo	#N/A
Chr5	8505447	8505447	+	1.30928e-07	0.00166328	-27.8595	AT5G24775	transposable_element_gene,mRNA,exon;			hypo	#N/A
Chr1	17714034	17714034	+	1.04463e-06	0.0087482	-27.8554	Chr1	transposable_element,transposon_fragment;			hypo	#N/A
Chr4	3658361	3658361	+	1.17421e-06	0.00954875	-27.8496	NONE				hypo	#N/A
Chr4	3910614	3910614	+	3.41616e-07	0.00364975	-27.8055	AT4G06682	transposable_element_gene,mRNA,exon;Chr4			hypo	#N/A
Chr4	1657608	1657608	+	6.68672e-07	0.00613587	-27.7845	NONE				hypo	#N/A
Chr2	16973022	16973022	+	2.10519e-07	0.0024986	-27.7553	AT2G40680	transposable_element_gene,mRNA,exon;Chr2			hypo	#N/A
Chr3	12686651	12686651	+	3.04413e-07	0.00332428	-27.7397	AT3G31317	transposable_element_gene,mRNA,exon;Chr3			hypo	#N/A
Chr5	12488964	12488964	+	1.99987e-09	4.30736e-05	-27.7015	AT5G33237	transposable_element_gene,mRNA,exon;Chr5			hypo	#N/A
Chr3	13638967	13638967	+	7.95587e-08	0.00109383	-27.6713	Chr3	transposable_element,transposon_fragment;			hypo	#N/A
Chr5	11505237	11505237	+	1.98998e-07	0.002373	-27.6575	AT5G30410	transposable_element_gene,mRNA,exon;Chr5			hypo	#N/A
Chr5	11153398	11153398	+	5.00628e-07	0.00488305	-27.6491	Chr5	transposable_element;			hypo	#N/A
Chr5	11168695	11168695	+	6.28164e-07	0.00584102	-27.5682	AT5G29380	transposable_element_gene,mRNA,exon;Chr5			hypo	#N/A
Chr5	22165194	22165194	+	2.79629e-11	8.83642e-07	-27.5056	NONE				hypo	#N/A
Chr2	3037977	3037977	+	1.94614e-08	0.000328269	-27.4552	AT2G07320	transposable_element_gene,mRNA;			hypo	#N/A
Chr3	15006878	15006878	+	2.43512e-09	5.16775e-05	-27.4487	AT3G42940	gene,mRNA,protein,exon,CDS;			hypo	#N/A
Chr3	17011241	17011241	+	4.82991e-07	0.00476033	-27.4177	NONE				hypo	#N/A
Chr3	14292596	14292596	+	1.20974e-07	0.00155935	-27.3988	AT3G42115	transposable_element_gene,mRNA,exon;Chr3			hypo	#N/A
Chr2	4509758	4509758	+	1.22107e-06	0.00985107	-27.3423	AT2G11330	transposable_element_gene,mRNA,exon;Chr2			hypo	#N/A
Chr2	15791345	15791345	+	1.8443e-07	0.00223352	-27.2637	NONE				hypo	#N/A
Chr2	15791338	15791338	+	1.25931e-07	0.00161093	-27.2351	NONE				hypo	#N/A
Chr5	12976700	12976700	+	2.11079e-10	5.69193e-06	-27.203	AT5G34820	transposable_element_gene,mRNA,exon;Chr5			hypo	#N/A
Chr5	12665161	12665161	+	4.07312e-07	0.00417307	-27.1855	AT5G33395	transposable_element_gene,mRNA,exon;			hypo	#N/A
Chr2	5036390	5036390	+	2.18024e-08	0.000360835	-27.1683	AT2G12440	transposable_element_gene,mRNA,exon;Chr2			hypo	#N/A
Chr2	2795018	2795018	+	5.86985e-07	0.00554549	-27.1394	Chr2	transposable_element,transposon_fragment;			hypo	#N/A
Chr5	11109509	11109509	+	8.57193e-07	0.00750484	-27.0806	AT5G29046	transposable_element_gene,mRNA,exon;Chr5			hypo	#N/A
Chr1	15734988	15734988	+	5.16067e-07	0.00499821	-27.0469	AT1G42130	transposable_element_gene,mRNA,exon;Chr1	CACTA-like transposase family (Tnp2/En/Spm), has a 1.6e-236 P-value blast match to gb|AAG52024.1|AC022456_5 Tam1-homologous transposon protein TNP2, putative		hypo	#N/A
Chr3	13968529	13968529	+	2.78148e-07	0.0031045	-27.0218	AT3G33154	transposable_element_gene,mRNA,exon;Chr3			hypo	#N/A
Chr3	14763251	14763251	+	2.54155e-07	0.00288933	-27.0175	AT3G42680	transposable_element_gene,mRNA;Chr3			hypo	#N/A
Chr5	5853712	5853712	+	1.1364e-06	0.0093313	-26.9997	AT5G17730	gene,mRNA,protein,CDS,exon;			hypo	#N/A
Chr4	2106850	2106850	+	4.43467e-07	0.00446211	-26.9737	AT4G04316	transposable_element_gene,mRNA,exon;			hypo	#N/A
Chr5	11273692	11273692	+	1.16663e-06	0.00950134	-26.9633	Chr5	transposable_element,transposon_fragment;			hypo	#N/A
Chr5	11038102	11038102	+	1.08733e-06	0.00903103	-26.9475	AT5G29015	transposable_element_gene,mRNA,exon;Chr5			hypo	#N/A
Chr2	4470433	4470433	+	5.92689e-07	0.00558782	-26.9343	AT2G11235	transposable_element_gene,mRNA,exon;Chr2			hypo	#N/A
Chr1	16190897	16190897	+	5.65176e-07	0.00537898	-26.89	AT1G43060	transposable_element_gene,mRNA,exon;Chr1	gypsy-like retrotransposon family (Athila), has a 1.8e-196 P-value blast match to GB:CAA57397 Athila ORF 1 (Arabidopsis thaliana)		hypo	#N/A
Chr4	4112666	4112666	+	5.26504e-07	0.00507299	-26.8677	AT4G07315	transposable_element_gene,mRNA,exon;Chr4			hypo	#N/A
Chr4	3324213	3324213	+	4.72663e-07	0.00468969	-26.8657	AT4G06527	transposable_element_gene,mRNA,exon;Chr4			hypo	#N/A
Chr4	4499599	4499599	+	9.0167e-07	0.00778694	-26.8429	AT4G07713	transposable_element_gene,mRNA,exon;Chr4			hypo	#N/A
Chr1	24506682	24506682	+	1.08904e-09	2.52427e-05	-26.8293	NONE				hypo	#N/A
Chr3	11845435	11845435	+	3.27427e-07	0.00352609	-26.8121	AT3G30211	transposable_element_gene,mRNA,exon;			hypo	#N/A
Chr1	12759381	12759381	+	1.97331e-07	0.0023559	-26.776	AT1G34967	transposable_element_gene,mRNA,exon;Chr1	copia-like retrotransposon family, has a 8.6e-83 P-value blast match to GB:CAA72989 open reading frame 1 (Ty1_Copia-element) (Brassica oleracea)		hypo	#N/A
Chr4	1729101	1729101	+	3.00344e-07	0.00329228	-26.6908	NONE				hypo	#N/A
Chr2	15791342	15791342	+	7.42851e-08	0.00103683	-26.683	NONE				hypo	#N/A
Chr1	16001672	16001672	+	3.83986e-07	0.00399497	-26.6603	AT1G42595	transposable_element_gene,mRNA,exon;Chr1	Mutator-like transposase family, has a 1.7e-75 P-value blast match to Q9S9L1 /206-367 Pfam PF03108 MuDR family transposase (MuDr-element domain)		hypo	#N/A
Chr3	15480654	15480654	+	4.73506e-07	0.00468969	-26.6477	NONE				hypo	#N/A
Chr5	11136931	11136931	+	8.18632e-07	0.00722983	-26.6457	AT5G29075	transposable_element_gene,mRNA,exon;Chr5			hypo	#N/A
Chr5	20394292	20394292	+	2.32014e-07	0.00268717	-26.5625	NONE				hypo	#N/A
Chr4	379109	379109	+	1.36752e-09	3.08676e-05	-26.5379	NONE				hypo	#N/A
Chr2	2932823	2932823	+	4.39516e-07	0.00442896	-26.5203	AT2G07070	transposable_element_gene,mRNA,exon;Chr2			hypo	#N/A
Chr5	12971728	12971728	+	1.02216e-06	0.00862075	-26.5203	AT5G34800	transposable_element_gene,mRNA,exon;Chr5			hypo	#N/A
Chr5	11467501	11467501	+	6.5573e-07	0.00604179	-26.5082	AT5G31845	transposable_element_gene,mRNA,exon;Chr5			hypo	#N/A
Chr4	3763638	3763638	+	7.31682e-08	0.00102336	-26.4832	NONE				hypo	#N/A
Chr4	2803347	2803347	+	4.94339e-08	0.00073675	-26.4706	Chr4	transposable_element,transposon_fragment;			hypo	#N/A
Chr4	6647133	6647133	+	4.06755e-07	0.00417251	-26.4648	Chr4	transposable_element,transposon_fragment;			hypo	#N/A
Chr5	12495759	12495759	+	1.1748e-07	0.00152305	-26.4389	Chr5	transposable_element,transposon_fragment;			hypo	#N/A
Chr2	4919038	4919038	+	2.21202e-07	0.00259945	-26.4368	Chr2	transposable_element,transposon_fragment;			hypo	#N/A
Chr4	3656188	3656188	+	1.22113e-06	0.00985107	-26.3955	Chr4	transposable_element,transposon_fragment;			hypo	#N/A
Chr2	17788402	17788402	+	5.36446e-08	0.00078561	-26.3798	AT2G42730	gene,mRNA,protein;			hypo	#N/A
Chr4	5988312	5988312	+	1.38509e-09	3.12292e-05	-26.3768	AT4G09455	transposable_element_gene,mRNA,exon;Chr4			hypo	#N/A
Chr4	3489692	3489692	+	2.05549e-07	0.00244679	-26.3733	AT4G06561	transposable_element_gene,mRNA,exon;Chr4			hypo	#N/A
Chr5	12913869	12913869	+	8.16072e-07	0.00721668	-26.3462	NONE				hypo	#N/A
Chr3	11854849	11854849	+	5.45401e-07	0.00521778	-26.3243	AT3G30213	transposable_element_gene,mRNA,exon;Chr3			hypo	#N/A
Chr3	12746493	12746493	+	1.53318e-07	0.00190776	-26.2764	AT3G31374	transposable_element_gene,mRNA,exon;Chr3			hypo	#N/A
Chr2	4611288	4611288	+	4.78937e-07	0.00473652	-26.2637	Chr2	transposable_element,transposon_fragment;			hypo	#N/A
Chr4	3134259	3134259	+	1.51774e-07	0.00189011	-26.2302	AT4G06495	transposable_element_gene,mRNA,exon;Chr4			hypo	#N/A
Chr3	5986992	5986992	+	4.15437e-07	0.00423671	-26.2255	AT3G17500	gene,mRNA,protein,exon,CDS;			hypo	#N/A
Chr1	13353200	13353200	+	7.63368e-08	0.00105744	-26.2182	NONE				hypo	#N/A
Chr2	1917457	1917457	+	5.24646e-11	1.58604e-06	-26.1663	NONE				hypo	#N/A
Chr4	6536735	6536735	+	4.17281e-07	0.00424936	-26.1626	Chr4	transposable_element,transposon_fragment;			hypo	#N/A
Chr4	6536723	6536723	+	7.89595e-08	0.00108633	-26.1587	Chr4	transposable_element,transposon_fragment;			hypo	#N/A
Chr4	14332293	14332293	+	3.61361e-08	0.000559166	-26.1538	NONE				hypo	#N/A
Chr3	14763286	14763286	+	2.32121e-07	0.00268717	-26.1459	AT3G42680	transposable_element_gene,mRNA;Chr3			hypo	#N/A
Chr2	1917468	1917468	+	4.24142e-09	8.56088e-05	-26.0985	NONE				hypo	#N/A
Chr1	24614265	24614265	+	9.65985e-09	0.000177604	-26.0274	AT1G66120	gene,mRNA,protein,exon,CDS;			hypo	#N/A
Chr2	1252053	1252053	+	1.58594e-09	3.52856e-05	-26.0056	NONE				hypo	#N/A
Chr5	11575653	11575653	+	1.09678e-07	0.00143663	-25.9854	AT5G31536	transposable_element_gene,mRNA,exon;Chr5			hypo	#N/A
Chr2	6028654	6028654	+	1.34555e-09	3.04054e-05	-25.9468	AT2G14230	transposable_element_gene,mRNA,exon;Chr2			hypo	#N/A
Chr2	4504697	4504697	+	4.01347e-07	0.00413436	-25.8441	AT2G11320	transposable_element_gene,mRNA,exon;Chr2			hypo	#N/A
Chr2	1927051	1927051	+	2.94271e-07	0.00324506	-25.8242	NONE				hypo	#N/A
Chr2	3654122	3654122	+	2.51759e-07	0.00286531	-25.803	Chr2	transposable_element,transposon_fragment;			hypo	#N/A
Chr4	10112349	10112349	+	1.95418e-09	4.21794e-05	-25.7993	NONE				hypo	#N/A
Chr4	8972655	8972655	+	2.82776e-07	0.00314574	-25.7576	AT4G15760	gene,mRNA,three_prime_UTR,exon;			hypo	#N/A
Chr5	11003633	11003633	+	7.75399e-08	0.00107117	-25.7372	AT5G28970	transposable_element_gene,mRNA,exon;Chr5			hypo	#N/A
Chr3	18861107	18861107	+	6.48495e-10	1.57637e-05	-25.7341	Chr3	transposable_element,transposon_fragment;			hypo	#N/A
Chr2	17788367	17788367	+	1.43534e-08	0.000251986	-25.6318	AT2G42730	gene,mRNA,protein;			hypo	#N/A
Chr4	2973389	2973389	+	9.44548e-08	0.00126509	-25.6225	AT4G05613	transposable_element_gene,mRNA,exon;Chr4			hypo	#N/A
Chr2	4487759	4487759	+	8.97373e-07	0.0077681	-25.62	NONE				hypo	#N/A
Chr2	4617970	4617970	+	4.02721e-07	0.00414071	-25.6198	Chr2	transposable_element,transposon_fragment;			hypo	#N/A
Chr1	21751597	21751597	+	2.17657e-11	6.94318e-07	-25.5769	AT1G58561	transposable_element_gene,mRNA,exon;AT1G58602	transposable_element,transposon_fragment;		hypo	#N/A
Chr4	3352631	3352631	+	3.02914e-07	0.00331327	-25.5655	AT4G06532	transposable_element_gene,mRNA,exon;Chr4			hypo	#N/A
Chr1	6744192	6744192	+	4.4586e-07	0.00447951	-25.4936	Chr1	transposable_element,transposon_fragment;			hypo	#N/A
Chr4	3523803	3523803	+	3.5385e-10	9.01308e-06	-25.3939	AT4G06639	gene,mRNA,protein,CDS,exon;			hypo	#N/A
Chr5	22165195	22165195	+	8.95684e-12	3.04781e-07	-25.3524	NONE				hypo	#N/A
Chr1	24614262	24614262	+	6.45633e-09	0.000123885	-25.3333	AT1G66120	gene,mRNA,protein,exon,CDS;			hypo	#N/A
Chr4	379127	379127	+	1.41077e-07	0.00177658	-25.3216	NONE				hypo	#N/A
Chr5	9182074	9182074	+	2.5948e-07	0.0029416	-25.2736	Chr5	transposable_element,transposon_fragment;			hypo	#N/A
Chr1	9812118	9812118	+	3.37423e-07	0.00361053	-25.2632	NONE				hypo	#N/A
Chr4	10112364	10112364	+	1.06258e-10	3.02677e-06	-25.2435	NONE				hypo	#N/A
Chr2	1917463	1917463	+	9.58376e-11	2.76498e-06	-25.2381	NONE				hypo	#N/A
Chr5	12979736	12979736	+	8.97924e-10	2.11408e-05	-25.2313	AT5G34825	transposable_element_gene,mRNA,exon;Chr5			hypo	#N/A
Chr3	12648243	12648243	+	1.09076e-06	0.00905581	-25.2144	AT3G30875	pseudogene,pseudogenic_transcript,pseudogenic_exon;			hypo	#N/A
Chr3	11855481	11855481	+	3.78678e-07	0.00394922	-25.2136	AT3G30213	transposable_element_gene,mRNA,exon;Chr3			hypo	#N/A
Chr4	6536668	6536668	+	5.92024e-07	0.00558457	-25.203	Chr4	transposable_element,transposon_fragment;			hypo	#N/A
Chr3	13665549	13665549	+	5.33954e-07	0.00513011	-25.163	AT3G33070	transposable_element_gene,mRNA,exon;Chr3			hypo	#N/A
Chr3	15011775	15011775	+	5.37259e-07	0.00515207	-25.1516	AT3G42945	transposable_element_gene,mRNA,exon;Chr3			hypo	#N/A
Chr2	2767673	2767673	+	9.51663e-08	0.00127294	-25.1507	AT2G06860	transposable_element_gene,mRNA;Chr2			hypo	#N/A
Chr4	4453072	4453072	+	8.16953e-07	0.00721815	-25.1409	AT4G07664	transposable_element_gene,mRNA,exon;Chr4			hypo	#N/A
Chr4	10112347	10112347	+	1.1627e-09	2.66911e-05	-25.0807	NONE				hypo	#N/A
Chr1	17961578	17961578	+	5.97687e-08	0.000857902	-25.0135	NONE				hypo	#N/A
Chr3	18254864	18254864	+	4.68301e-11	1.42637e-06	25.0519	AT3G49230	gene,mRNA,protein,exon,CDS;			hyper	#N/A
Chr4	2800870	2800870	+	1.17176e-07	0.00152009	25.3007	Chr4	transposable_element,transposon_fragment;			hyper	#N/A
Chr3	9739424	9739424	+	6.4162e-07	0.00594156	27.2252	NONE				hyper	#N/A
Chr2	4871049	4871049	+	6.70996e-07	0.00615162	27.5375	NONE				hyper	#N/A
Chr4	5964697	5964697	+	4.59246e-07	0.00458665	28.8264	Chr4	transposable_element,transposon_fragment;			hyper	#N/A
Chr3	8426947	8426947	+	2.62603e-07	0.00296537	29.0237	NONE				hyper	#N/A
Chr2	8568544	8568544	+	2.28759e-07	0.00266504	29.1644	NONE				hyper	#N/A
Chr4	2019985	2019985	+	3.62851e-09	7.48533e-05	29.2019	NONE				hyper	#N/A
Chr3	10938221	10938221	+	7.77156e-16	4.9582e-11	29.305	NONE				hyper	#N/A
Chr1	17874305	17874305	+	4.40083e-07	0.00443247	30.1242	Chr1	transposable_element,transposon_fragment;			hyper	#N/A
Chr5	10613485	10613485	+	2.27769e-08	0.000375733	30.1542	NONE				hyper	#N/A
Chr1	18931294	18931294	+	8.78859e-07	0.00763834	30.1587	NONE				hyper	#N/A
Chr1	18931282	18931282	+	1.03108e-06	0.00868509	30.1667	NONE				hyper	#N/A
Chr2	8568522	8568522	+	3.3602e-08	0.00052289	30.7108	NONE				hyper	#N/A
Chr1	23152504	23152504	+	3.85572e-07	0.0040072	31.0189	AT1G62540	gene,mRNA,protein;			hyper	#N/A
Chr1	18931298	18931298	+	5.53878e-08	0.000806468	31.044	NONE				hyper	#N/A
Chr3	10938197	10938197	+	0	0	31.2969	NONE				hyper	#N/A
Chr5	13615663	13615663	+	6.48106e-11	1.92758e-06	31.7073	NONE				hyper	#N/A
Chr4	1063728	1063728	+	2.60431e-07	0.00294758	31.9444	NONE				hyper	#N/A
Chr2	8568518	8568518	+	2.7831e-07	0.0031045	32.1529	NONE				hyper	#N/A
Chr5	13615674	13615674	+	6.1278e-10	1.49494e-05	32.5855	NONE				hyper	#N/A
Chr2	4871221	4871221	+	2.8966e-07	0.00321349	32.8049	NONE				hyper	#N/A
Chr5	13615665	13615665	+	4.85619e-10	1.20655e-05	32.9969	NONE				hyper	#N/A
Chr3	557977	557977	+	1.57588e-07	0.00195529	33.1071	NONE				hyper	#N/A
Chr1	19781079	19781079	+	1.15841e-06	0.00945191	33.4174	NONE				hyper	#N/A
Chr3	9232673	9232673	+	1.98023e-07	0.00236277	33.5859	NONE				hyper	#N/A
Chr2	8568555	8568555	+	7.01182e-07	0.00638494	33.956	NONE				hyper	#N/A
Chr3	21509532	21509532	+	6.02805e-07	0.00566249	35.0543	NONE				hyper	#N/A
Chr4	2020126	2020126	+	8.6373e-07	0.00754575	35.0992	NONE				hyper	#N/A
Chr1	25343356	25343356	+	8.73345e-07	0.00761001	35.1064	Chr1	transposable_element,transposon_fragment;			hyper	#N/A
Chr3	21509509	21509509	+	3.82681e-07	0.00398532	35.8757	NONE				hyper	#N/A
Chr2	8568527	8568527	+	2.68346e-08	0.000430041	35.9389	NONE				hyper	#N/A
Chr1	29263889	29263889	+	1.6593e-07	0.00204001	36.2173	AT1G77820	transposable_element_gene,mRNA,exon;Chr1			hyper	#N/A
Chr1	29263924	29263924	+	1.81002e-07	0.00219464	37.4064	AT1G77820	transposable_element_gene,mRNA,exon;Chr1			hyper	#N/A
Chr2	8568508	8568508	+	7.08846e-08	0.000996467	37.4306	NONE				hyper	#N/A
Chr1	12960043	12960043	+	3.61678e-08	0.000559229	37.6965	AT1G35320	gene,mRNA;	unknown protein		hyper	#N/A
Chr1	29263920	29263920	+	7.99667e-08	0.0010972	38.1485	AT1G77820	transposable_element_gene,mRNA,exon;Chr1			hyper	#N/A
Chr1	29263931	29263931	+	9.96217e-08	0.00131599	38.1723	AT1G77820	transposable_element_gene,mRNA,exon;Chr1			hyper	#N/A
Chr1	29263932	29263932	+	1.7861e-07	0.00216953	39.4634	AT1G77820	transposable_element_gene,mRNA,exon;Chr1			hyper	#N/A
Chr1	29263929	29263929	+	1.62817e-07	0.00200756	39.9086	AT1G77820	transposable_element_gene,mRNA,exon;Chr1			hyper	#N/A
Chr5	17107735	17107735	+	6.27674e-08	0.000896354	41.5094	NONE				hyper	#N/A
Chr2	8568520	8568520	+	3.35597e-09	6.99715e-05	42.1763	NONE				hyper	#N/A
Chr3	14762036	14762036	+	7.21344e-11	2.12974e-06	43.7753	NONE				hyper	#N/A
Chr5	17107743	17107743	+	3.55537e-08	0.000550997	44	NONE				hyper	#N/A
Chr5	17107744	17107744	+	3.55537e-08	0.000550997	44	NONE				hyper	#N/A
Chr5	17107740	17107740	+	1.46878e-08	0.000256078	45.098	NONE				hyper	#N/A
Chr5	17107691	17107691	+	6.10623e-15	3.43041e-10	45.1623	Chr5	transposable_element,transposon_fragment;			hyper	#N/A
Chr1	25343336	25343336	+	9.90289e-11	2.84488e-06	47.5316	NONE				hyper	#N/A
Chr5	17107693	17107693	+	5.21805e-15	2.97273e-10	47.6696	Chr5	transposable_element,transposon_fragment;			hyper	#N/A
Chr5	17107688	17107688	+	3.10862e-15	1.84369e-10	47.7047	Chr5	transposable_element,transposon_fragment;			hyper	#N/A
Chr1	12435644	12435644	+	5.01523e-07	0.00488348	51.2121	NONE				hyper	#N/A
Chr2	8568448	8568448	+	4.76091e-07	0.00471069	52.1303	NONE				hyper	#N/A
Chr1	12435640	12435640	+	2.83591e-08	0.000450545	52.2727	NONE				hyper	#N/A
Chr1	12435642	12435642	+	4.29938e-09	8.65196e-05	56.8182	NONE				hyper	#N/A
Chr3	20768664	20768664	+	5.31247e-07	0.00511138	58.1395	AT3G55970	gene,mRNA,protein;			hyper	#N/A
Chr5	17107726	17107726	+	0	0	64.206	NONE				hyper	#N/A
Chr1	26185919	26185919	+	1.41778e-07	0.00178431	66.6667	NONE				hyper	#N/A
Chr5	17107723	17107723	+	0	0	66.6969	NONE				hyper	#N/A
Chr5	17107710	17107710	+	0	0	67.5676	NONE				hyper	#N/A
Chr1	25343353	25343353	+	6.68085e-08	0.000944867	75.0388	Chr1	transposable_element,transposon_fragment;			hyper	#N/A

## Sheet: 21,919_CG10%
chr	start	end	strand	pvalue	qvalue	meth.diff	geneinfo	category1	description	5% geneinfo match	hyper/hypo	5% DMbase (start) match
Chr1	26034074	26034074	+	0	0	-92.2078	AT1G69250	gene,mRNA,protein,exon,CDS;Chr1		OK	hypo	OK
Chr1	29160116	29160116	-	2.01595e-08	5.22753e-06	-88.0702	AT1G77600	gene,mRNA,protein,CDS,exon;		OK	hypo	OK
Chr1	20840509	20840509	-	8.65974e-15	1.03685e-11	-87.6701	AT1G55750	gene,mRNA,protein,CDS,exon;		OK	hypo	OK
Chr1	28088229	28088229	+	0	0	-87.4329	AT1G74750	gene,mRNA,protein,exon,CDS;		OK	hypo	OK
Chr1	6048813	6048813	+	3.10307e-13	2.73061e-10	-85.5204	AT1G17580	gene,mRNA,protein,exon,CDS;	myosin 1	OK	hypo	OK
Chr1	28621446	28621446	+	5.03305e-10	2.04244e-07	-82.0106	AT1G76280	gene,mRNA,protein,CDS,exon;		OK	hypo	OK
Chr1	30101672	30101672	+	1.497e-07	2.99117e-05	-81.8182	AT1G80020	transposable_element_gene,mRNA,exon;Chr1		OK	hypo	OK
Chr1	11460100	11460100	-	3.90132e-13	3.36421e-10	-80.5556	AT1G31910	gene,mRNA,protein,exon,CDS;		OK	hypo	OK
Chr1	29997953	29997953	+	9.52241e-07	0.000146726	-80.1587	AT1G79710	gene,mRNA,exon,three_prime_UTR;AT1G79720		OK	hypo	OK
Chr1	29667451	29667451	+	7.99361e-14	7.96885e-11	-78.7375	AT1G78910	gene,mRNA,protein,exon,CDS;		OK	hypo	OK
Chr1	26991468	26991468	-	0	0	-78.3784	AT1G71770	gene,mRNA,protein,CDS,exon;		OK	hypo	OK
Chr1	23958093	23958093	+	5.40679e-14	5.57798e-11	-78.022	AT1G64520	gene,mRNA,protein,exon,CDS;		OK	hypo	OK
Chr1	494879	494879	+	0	0	-77.3873	AT1G02420	gene,mRNA,protein,exon,CDS;	Pentatricopeptide repeat (PPR) superfamily protein	OK	hypo	OK
Chr1	9541988	9541988	-	1.11022e-16	1.86814e-13	-76.7677	AT1G27470	gene,mRNA,protein,CDS,exon;	transducin family protein / WD-40 repeat family protein	OK	hypo	OK
Chr1	2072756	2072756	+	1.5849e-06	0.000226454	-76.2821	AT1G06740	transposable_element_gene,mRNA,exon;Chr1	Mutator-like transposase family, has a 2.7e-53 P-value blast match to GB:AAA21566 mudrA of transposon=MuDR (MuDr-element) (Zea mays)	OK	hypo	OK
Chr1	6066038	6066038	+	0	0	-76.2821	AT1G17630	gene,mRNA,protein,exon,CDS;	Pentatricopeptide repeat (PPR-like) superfamily protein	OK	hypo	OK
Chr1	3603022	3603022	+	0	0	-75.9358	AT1G10820	gene,mRNA,protein,CDS,exon;	Protein of unknown function (DUF3755)	OK	hypo	OK
Chr1	3603023	3603023	-	0	0	-75.4018	AT1G10820	gene,mRNA,protein,CDS,exon;	Protein of unknown function (DUF3755)	OK	hypo	OK
Chr1	4257957	4257957	+	0	0	-75.2525	AT1G12480	gene,mRNA,protein,CDS,exon;	C4-dicarboxylate transporter/malic acid transport protein	OK	hypo	OK
Chr1	1781244	1781244	+	2.46649e-09	8.29379e-07	-75	AT1G05890	gene,mRNA,protein,exon,CDS;	RING/U-box superfamily protein	OK	hypo	OK
Chr1	7776031	7776031	+	1.49391e-06	0.000215283	-75	AT1G22060	gene,mRNA,protein,CDS,exon;	LOCATED IN: vacuole	OK	hypo	OK
Chr1	8000022	8000022	-	0	0	-75	AT1G22620	gene,mRNA,protein,CDS,exon;	Phosphoinositide phosphatase family protein	OK	hypo	OK
Chr1	5771551	5771551	+	0	0	-74.1062	AT1G16870	gene,mRNA,protein,CDS,exon;	mitochondrial 28S ribosomal protein S29-related	OK	hypo	OK
Chr1	10087177	10087177	-	0	0	-74.0741	AT1G28710	gene,mRNA,protein,CDS,exon;	Nucleotide-diphospho-sugar transferase family protein	OK	hypo	OK
Chr1	24137979	24137979	-	0	0	-73.9217	AT1G64980	gene,mRNA,protein,CDS,exon;		OK	hypo	OK
Chr1	2274052	2274052	+	0	0	-73.5788	AT1G07390	gene,mRNA,protein,exon,CDS;	receptor like protein 1	OK	hypo	OK
Chr1	27030340	27030340	-	2.54301e-06	0.000338883	-73.0994	AT1G71865	gene,mRNA,protein,exon,CDS;		OK	hypo	OK
Chr1	1796215	1796215	+	0	0	-72.8648	AT1G05910	gene,mRNA,protein,exon,CDS;	cell division cycle protein 48-related / CDC48-related	OK	hypo	OK
Chr1	4257579	4257579	+	1.05427e-12	8.29798e-10	-72.5146	AT1G12480	gene,mRNA,protein,CDS,exon;	C4-dicarboxylate transporter/malic acid transport protein	OK	hypo	OK
Chr1	30065361	30065361	+	0	0	-71.5517	AT1G79930	gene,mRNA,protein;		OK	hypo	OK
Chr1	24476335	24476335	-	1.34714e-12	1.03628e-09	-71.131	AT1G65800	gene,mRNA,protein,exon,CDS;		OK	hypo	OK
Chr1	10425005	10425005	-	1.08672e-11	6.7189e-09	-71.1064	AT1G29770	gene,mRNA,protein,exon,CDS;	Haloacid dehalogenase-like hydrolase (HAD) superfamily protein	OK	hypo	OK
Chr1	30124140	30124140	-	9.33142e-13	7.43001e-10	-71.0884	AT1G80070	gene,mRNA,protein;		OK	hypo	OK
Chr1	4791035	4791035	-	0	0	-70.8682	AT1G13980	gene,mRNA,protein,exon,CDS;	sec7 domain-containing protein	OK	hypo	OK
Chr1	29728587	29728587	-	0	0	-70.7298	AT1G79020	gene,mRNA,protein;		OK	hypo	OK
Chr1	3835711	3835711	+	1.58175e-08	4.24138e-06	-70.625	AT1G11390	gene,mRNA,protein;	Protein kinase superfamily protein	OK	hypo	OK
Chr1	3282215	3282215	-	5.55112e-16	8.43503e-13	-70.1528	AT1G10050	gene,mRNA,protein,exon,CDS;	glycosyl hydrolase family 10 protein / carbohydrate-binding domain-containing protein	OK	hypo	OK
Chr1	12538072	12538072	+	1.56541e-14	1.78639e-11	-70.101	AT1G34355	gene,mRNA,protein,exon,CDS;		OK	hypo	OK
Chr1	21885317	21885317	-	6.01484e-09	1.81451e-06	-69.9584	AT1G59580	gene,mRNA,protein,exon,CDS;		OK	hypo	OK
Chr1	5770042	5770042	+	0	0	-69.6778	AT1G16858	gene,mRNA,exon,three_prime_UTR;AT1G16860	conserved peptide upstream open reading frame 55	OK	hypo	OK
Chr1	4999353	4999353	+	3.00308e-09	9.85706e-07	-69.5652	AT1G14590	gene,mRNA,protein,CDS,exon;	Nucleotide-diphospho-sugar transferase family protein	OK	hypo	OK
Chr1	28090914	28090914	-	3.30551e-10	1.40587e-07	-69.4737	AT1G74770	gene,mRNA,protein,CDS,exon;		OK	hypo	OK
Chr1	30080067	30080067	+	9.54792e-15	1.1311e-11	-69.4386	AT1G79960	gene,mRNA,protein,CDS,exon;		OK	hypo	OK
Chr1	28088230	28088230	-	0	0	-69.3662	AT1G74750	gene,mRNA,protein,exon,CDS;		OK	hypo	OK
Chr1	3641710	3641710	+	4.15057e-12	2.85121e-09	-69.2308	AT1G10910	gene,mRNA,protein;	Pentatricopeptide repeat (PPR) superfamily protein	OK	hypo	OK
Chr1	8022716	8022716	-	0	0	-69.2308	AT1G22670	gene,mRNA,protein,CDS,exon;	Protease-associated (PA) RING/U-box zinc finger family protein	OK	hypo	OK
Chr1	11460099	11460099	+	6.27853e-10	2.4809e-07	-69.2308	AT1G31910	gene,mRNA,protein,exon,CDS;		OK	hypo	OK
Chr1	27475604	27475604	-	0	0	-69.1621	AT1G73040	gene,mRNA,protein,CDS,exon;		OK	hypo	OK
Chr1	28632475	28632475	+	0	0	-68.6706	AT1G76320	gene,mRNA,protein,exon,CDS;		OK	hypo	OK
Chr1	16470250	16470250	+	6.27918e-11	3.2399e-08	-68.6514	AT1G43670	gene,mRNA,protein,exon,CDS;		OK	hypo	OK
Chr1	4435134	4435134	+	0	0	-68.4444	AT1G12990	gene,mRNA,protein,exon,CDS;	beta-1,4-N-acetylglucosaminyltransferase family protein	OK	hypo	OK
Chr1	6570737	6570737	-	1.50422e-07	3.00365e-05	-68.2609	AT1G19025	gene,mRNA,protein,exon,CDS;	DNA repair metallo-beta-lactamase family protein	OK	hypo	OK
Chr1	21166691	21166691	+	1.09594e-09	4.04894e-07	-68.2251	AT1G56500	gene,mRNA,protein;		OK	hypo	OK
Chr1	532407	532407	+	2.43383e-12	1.77022e-09	-68.1442	AT1G02530	gene,mRNA,protein,exon,CDS;	P-glycoprotein 12	OK	hypo	OK
Chr1	29667452	29667452	-	7.63944e-13	6.20707e-10	-67.9599	AT1G78910	gene,mRNA,protein,exon,CDS;		OK	hypo	OK
Chr1	29274360	29274360	-	0	0	-67.8872	AT1G77850	gene,mRNA,protein,exon,CDS;		OK	hypo	OK
Chr1	25106959	25106959	+	1.04631e-10	5.07778e-08	-67.8855	AT1G67140	gene,mRNA,protein,CDS,exon;		OK	hypo	OK
Chr1	4754087	4754087	-	0	0	-67.8187	AT1G13900	gene,mRNA,protein,CDS,exon;	Purple acid phosphatases superfamily protein	OK	hypo	OK
Chr1	7928599	7928599	+	1.11022e-16	1.86814e-13	-67.6471	AT1G22460	gene,mRNA,protein,CDS,exon;	O-fucosyltransferase family protein	OK	hypo	OK
Chr1	19661062	19661062	+	4.30878e-13	3.67529e-10	-67.5737	AT1G52780	gene,mRNA,protein,exon,CDS;		OK	hypo	OK
Chr1	4017970	4017970	-	8.82256e-11	4.36819e-08	-67.5325	AT1G11910	gene,mRNA,protein,CDS,exon;	aspartic proteinase A1	OK	hypo	OK
Chr1	11397340	11397340	+	2.93388e-12	2.09559e-09	-67.3913	AT1G31800	gene,mRNA,protein,exon,CDS;		OK	hypo	OK
Chr1	26820343	26820343	+	6.27054e-12	4.112e-09	-67.193	AT1G71110	gene,mRNA,protein,exon,CDS;		OK	hypo	OK
Chr1	21166692	21166692	-	1.18235e-10	5.66076e-08	-67.1795	AT1G56500	gene,mRNA,protein;		OK	hypo	OK
Chr1	29394609	29394609	-	0	0	-67.1467	AT1G78120	gene,mRNA,protein,CDS,exon;		OK	hypo	OK
Chr1	27828628	27828628	-	1.60016e-06	0.000228264	-67.1429	AT1G73990	gene,mRNA,protein,exon,CDS;		OK	hypo	OK
Chr1	10733206	10733206	+	8.51134e-10	3.23595e-07	-67.0906	AT1G30400	gene,mRNA,protein,exon,CDS;		OK	hypo	OK
Chr1	28090913	28090913	+	4.88498e-15	6.16627e-12	-66.733	AT1G74770	gene,mRNA,protein,CDS,exon;		OK	hypo	OK
Chr1	8760181	8760181	-	0	0	-66.7299	AT1G24764	gene,mRNA,protein,CDS,exon;	microtubule-associated proteins 70-2	OK	hypo	OK
Chr1	5094875	5094875	-	0	0	-66.6667	AT1G14790	gene,mRNA,protein,CDS,exon;	RNA-dependent RNA polymerase 1	OK	hypo	OK
Chr1	5943363	5943363	-	4.62091e-11	2.46474e-08	-66.6667	AT1G17350	gene,mRNA,protein,exon,CDS;	NADH:ubiquinone oxidoreductase intermediate-associated protein 30	OK	hypo	OK
Chr1	9025147	9025147	-	1.62583e-08	4.34444e-06	-66.6667	AT1G26110	gene,mRNA,protein,CDS,exon;	decapping 5	OK	hypo	OK
Chr1	8407135	8407135	-	0	0	-66.6514	AT1G23780	gene,mRNA,protein,CDS,exon;	F-box family protein	OK	hypo	OK
Chr1	10290529	10290529	-	3.06977e-13	2.70452e-10	-66.4771	AT1G29400	gene,mRNA,protein;	MEI2-like protein 5	OK	hypo	OK
Chr1	4791034	4791034	+	0	0	-66.4615	AT1G13980	gene,mRNA,protein,exon,CDS;	sec7 domain-containing protein	OK	hypo	OK
Chr1	9546814	9546814	+	0	0	-66.2664	AT1G27490	gene,mRNA,protein,CDS,exon;	F-box and associated interaction domains-containing protein	OK	hypo	OK
Chr1	2546628	2546628	-	2.13922e-10	9.54278e-08	-66.1538	AT1G08130	gene,mRNA,protein,CDS,exon;	DNA ligase 1	OK	hypo	OK
Chr1	11361040	11361040	-	5.53664e-07	9.21987e-05	-66.1111	AT1G31730	gene,mRNA,protein;		OK	hypo	OK
Chr1	6532266	6532266	+	0	0	-65.7485	AT1G18900	gene,mRNA,protein,exon,CDS;	Pentatricopeptide repeat (PPR) superfamily protein	OK	hypo	OK
Chr1	6693683	6693683	+	3.49331e-06	0.000444926	-65.7143	AT1G19370	gene,mRNA,protein,CDS,exon;	unknown protein	OK	hypo	OK
Chr1	27566074	27566074	+	5.62161e-12	3.7301e-09	-65.7143	AT1G73320	gene,mRNA,protein,CDS,exon,three_prime_UTR;		OK	hypo	OK
Chr1	1853507	1853507	-	0	0	-65.4567	AT1G06110	gene,mRNA,protein,CDS,exon;	SKP1/ASK-interacting protein 16	OK	hypo	OK
Chr1	23744144	23744144	-	4.86278e-14	5.0605e-11	-65.4095	AT1G63990	gene,mRNA,protein,CDS,exon;		OK	hypo	OK
Chr1	7304504	7304504	+	1.38054e-11	8.32943e-09	-65.3846	AT1G20960	gene,mRNA,protein,CDS,exon;	U5 small nuclear ribonucleoprotein helicase, putative	OK	hypo	OK
Chr1	18529113	18529113	-	1.1749e-06	0.000175408	-65.3017	AT1G50030	gene,mRNA,protein;		OK	hypo	OK
Chr1	29274359	29274359	+	4.44089e-16	6.86077e-13	-65.1648	AT1G77850	gene,mRNA,protein,exon,CDS;		OK	hypo	OK
Chr1	8100871	8100871	+	0	0	-65.1494	AT1G22882	gene,mRNA,protein,exon,CDS;	Galactose-binding protein	OK	hypo	OK
Chr1	2314015	2314015	-	0	0	-65.1174	AT1G07530	gene,mRNA,protein,CDS,exon;	SCARECROW-like 14	OK	hypo	OK
Chr1	11397346	11397346	+	0	0	-65.0943	AT1G31800	gene,mRNA,protein,exon,CDS;		OK	hypo	OK
Chr1	25106960	25106960	-	2.97911e-10	1.28105e-07	-65.0776	AT1G67140	gene,mRNA,protein,CDS,exon;		OK	hypo	OK
Chr1	18529073	18529073	-	2.09136e-08	5.39019e-06	-65	AT1G50030	gene,mRNA,protein;		OK	hypo	OK
Chr1	7928600	7928600	-	1.23457e-12	9.5825e-10	-64.9616	AT1G22460	gene,mRNA,protein,CDS,exon;	O-fucosyltransferase family protein	OK	hypo	OK
Chr1	20718032	20718032	-	0	0	-64.864	AT1G55490	gene,mRNA,protein,CDS,exon;		OK	hypo	OK
Chr1	23804510	23804510	-	0	0	-64.8324	AT1G64140	gene,mRNA,protein,CDS,exon;AT1G64142		OK	hypo	OK
Chr1	22730693	22730693	+	8.88178e-16	1.29942e-12	-64.7619	AT1G61600	gene,mRNA,protein,exon,CDS;		OK	hypo	OK
Chr1	23873330	23873330	+	3.33067e-16	5.22857e-13	-64.6612	AT1G64330	gene,mRNA,protein,exon,CDS;		OK	hypo	OK
Chr1	6368418	6368418	-	4.32435e-11	2.32365e-08	-64.5833	AT1G18490	gene,mRNA,protein,exon,CDS;	Protein of unknown function (DUF1637)	OK	hypo	OK
Chr1	1781245	1781245	-	0	0	-64.5015	AT1G05890	gene,mRNA,protein,exon,CDS;	RING/U-box superfamily protein	OK	hypo	OK
Chr1	11184639	11184639	+	0	0	-64.436	AT1G31280	gene,mRNA,protein,exon,CDS;		OK	hypo	OK
Chr1	2651748	2651748	+	2.22045e-16	3.58774e-13	-64.4068	AT1G08420	gene,mRNA,protein,exon,CDS;	BRI1 suppressor 1 (BSU1)-like 2	OK	hypo	OK
Chr1	5333574	5333574	-	3.33067e-16	5.22857e-13	-64.3429	AT1G15520	gene,mRNA,protein;	pleiotropic drug resistance 12	OK	hypo	OK
Chr1	30124139	30124139	+	7.67275e-13	6.22726e-10	-64.3403	AT1G80070	gene,mRNA,protein;		OK	hypo	OK
Chr1	2314713	2314713	+	7.09988e-13	5.80694e-10	-64.2857	AT1G07530	gene,mRNA,protein,CDS,exon;	SCARECROW-like 14	OK	hypo	OK
Chr1	10291758	10291758	+	6.57252e-14	6.64894e-11	-64.2857	AT1G29400	gene,mRNA,protein,CDS,exon;	MEI2-like protein 5	OK	hypo	OK
Chr1	11541836	11541836	+	3.44169e-15	4.45698e-12	-64.2857	AT1G32090	gene,mRNA,protein,CDS,exon;		OK	hypo	OK
Chr1	3795087	3795087	-	3.09197e-11	1.7225e-08	-64.2477	AT1G11300	gene,mRNA,protein,exon,CDS;	protein serine/threonine kinases	OK	hypo	OK
Chr1	4017969	4017969	+	1.08247e-13	1.053e-10	-64.0071	AT1G11910	gene,mRNA,protein,CDS,exon;	aspartic proteinase A1	OK	hypo	OK
Chr1	9943159	9943159	+	6.18467e-10	2.44616e-07	-63.9818	AT1G28340	gene,mRNA,protein,exon,CDS;	receptor like protein 4	OK	hypo	OK
Chr1	12266422	12266422	-	1.11022e-16	1.86814e-13	-63.9303	AT1G33810	gene,mRNA,protein;		OK	hypo	OK
Chr1	23864346	23864346	+	0	0	-63.7125	AT1G64300	gene,mRNA,protein,exon,CDS;		OK	hypo	OK
Chr1	9943160	9943160	-	1.47899e-07	2.9595e-05	-63.6829	AT1G28340	gene,mRNA,protein,exon,CDS;	receptor like protein 4	OK	hypo	OK
Chr1	26202691	26202691	-	0	0	-63.6291	AT1G69670	gene,mRNA,protein,CDS,exon;		OK	hypo	OK
Chr1	21010634	21010634	-	0	0	-63.5417	AT1G56145	gene,mRNA,protein,CDS,exon;		OK	hypo	OK
Chr1	1961134	1961134	-	0	0	-63.5009	AT1G06430	gene,mRNA,protein,CDS,exon;	FTSH protease 8	OK	hypo	OK
Chr1	4074097	4074097	+	0	0	-63.4299	AT1G12050	gene,mRNA,protein,exon,CDS;	fumarylacetoacetase, putative	OK	hypo	OK
Chr1	28652142	28652142	-	2.74707e-07	5.05576e-05	-63.3333	AT1G76380	gene,mRNA,protein,CDS,exon;		OK	hypo	OK
Chr1	25240238	25240238	+	7.62346e-12	4.8908e-09	-63.2295	AT1G67370	gene,mRNA,protein,CDS,exon;		OK	hypo	OK
Chr1	1317302	1317302	+	2.30482e-13	2.08778e-10	-63.2035	AT1G04700	gene,mRNA,protein,exon,CDS;	PB1 domain-containing protein tyrosine kinase	OK	hypo	OK
Chr1	29819624	29819624	-	1.2442e-08	3.44127e-06	-63.141	AT1G79280	gene,mRNA,protein,CDS,exon;		OK	hypo	OK
Chr1	26923010	26923010	+	1.30039e-11	7.89611e-09	-63.0471	AT1G71440	gene,mRNA,protein,CDS,exon;		OK	hypo	OK
Chr1	29565234	29565234	+	0	0	-63.027	AT1G78590	gene,mRNA,protein;		OK	hypo	OK
Chr1	27788228	27788228	-	2.85889e-05	0.0026235	-63	AT1G73890	gene,mRNA,protein,CDS,exon;		OK	hypo	OK
Chr1	23732475	23732475	+	1.61723e-05	0.00162426	-62.987	AT1G63940	gene,mRNA,protein,exon,CDS;		OK	hypo	OK
Chr1	24476334	24476334	+	0	0	-62.9349	AT1G65800	gene,mRNA,protein,exon,CDS;		OK	hypo	OK
Chr1	22220329	22220329	-	5.6045e-05	0.00459689	-62.8788	AT1G60260	gene,mRNA,protein,CDS,exon;		OK	hypo	OK
Chr1	29150851	29150851	-	9.3581e-11	4.59965e-08	-62.8788	AT1G77590	gene,mRNA,protein,CDS,exon;		OK	hypo	OK
Chr1	19567087	19567087	+	0	0	-62.8717	AT1G52520	gene,mRNA,protein,exon,CDS;		OK	hypo	OK
Chr1	30079725	30079725	+	0	0	-62.8061	AT1G79960	gene,mRNA,protein,CDS,exon;		OK	hypo	OK
Chr1	6407100	6407100	-	2.85933e-10	1.235e-07	-62.8049	AT1G18610	gene,mRNA,protein;	Galactose oxidase/kelch repeat superfamily protein	OK	hypo	OK
Chr1	19757875	19757875	+	1.11022e-16	1.86814e-13	-62.799	AT1G53025	gene,mRNA,protein;		OK	hypo	OK
Chr1	19151622	19151622	+	3.88471e-10	1.62236e-07	-62.7193	AT1G51640	gene,mRNA,protein,CDS,exon;AT1G51645		OK	hypo	OK
Chr1	5319145	5319145	+	0	0	-62.6263	AT1G15480	gene,mRNA,protein;	Tetratricopeptide repeat (TPR)-like superfamily protein	OK	hypo	OK
Chr1	12490131	12490131	-	1.62963e-05	0.00163488	-62.5	AT1G34260	gene,mRNA,protein,exon,CDS;		OK	hypo	OK
Chr1	29676367	29676367	+	1.96254e-06	0.000271999	-62.5	AT1G78920	gene,mRNA,protein,exon,CDS;		OK	hypo	OK
Chr1	11848004	11848004	-	1.20051e-10	5.73358e-08	-62.4211	AT1G32750	gene,mRNA,protein,CDS,exon;		OK	hypo	OK
Chr1	23000787	23000787	+	3.1476e-10	1.34459e-07	-62.3684	AT1G62262	gene,mRNA,protein,CDS,exon;		OK	hypo	OK
Chr1	29151577	29151577	-	0	0	-62.3611	AT1G77590	gene,mRNA,protein,CDS,exon;		OK	hypo	OK
Chr1	3633635	3633635	-	3.53172e-06	0.000449178	-62.3188	AT1G10900	gene,mRNA,protein,CDS,exon;	Phosphatidylinositol-4-phosphate 5-kinase family protein	OK	hypo	OK
Chr1	19757876	19757876	-	9.15432e-10	3.45377e-07	-62.3138	AT1G53025	gene,mRNA,protein;		OK	hypo	OK
Chr1	20213081	20213081	-	2.19637e-11	1.26906e-08	-62.2105	AT1G54130	gene,mRNA,protein,exon,CDS;		OK	hypo	OK
Chr1	18353883	18353883	+	1.90048e-08	4.97026e-06	-62.1328	AT1G49580	gene,mRNA,protein,exon,CDS;		OK	hypo	OK
Chr1	7307847	7307847	-	2.07612e-13	1.90016e-10	-62.1132	AT1G20960	gene,mRNA,protein,CDS,exon;	U5 small nuclear ribonucleoprotein helicase, putative	OK	hypo	OK
Chr1	27099404	27099404	-	3.64819e-13	3.16809e-10	-61.9883	AT1G71980	gene,mRNA,protein,exon,CDS;		OK	hypo	OK
Chr1	7713939	7713939	+	4.47323e-09	1.39921e-06	-61.9444	AT1G21930	gene,mRNA,protein;	unknown protein	OK	hypo	OK
Chr1	8892923	8892923	+	4.77577e-07	8.13037e-05	-61.9369	AT1G25350	gene,mRNA,protein,CDS,exon;	glutamine-tRNA ligase, putative / glutaminyl-tRNA synthetase, putative / GlnRS, putative	OK	hypo	OK
Chr1	3468764	3468764	+	0	0	-61.8663	AT1G10520	gene,mRNA,protein;	DNA polymerase lambda (POLL)	OK	hypo	OK
Chr1	25071705	25071705	-	0	0	-61.8199	AT1G67120	gene,mRNA,protein,CDS,exon;		OK	hypo	OK
Chr1	4823315	4823315	-	8.45707e-07	0.000132508	-61.7716	AT1G14080	gene,mRNA,protein,exon,CDS;	fucosyltransferase 6	OK	hypo	OK
Chr1	7246116	7246116	-	4.1217e-12	2.83296e-09	-61.5517	AT1G20840	gene,mRNA,protein,CDS,exon;	tonoplast monosaccharide transporter1	OK	hypo	OK
Chr1	3114276	3114276	+	0.000121238	0.0087141	-61.5385	AT1G09620	gene,mRNA,protein,CDS,exon;	ATP binding	OK	hypo	OK
Chr1	30080068	30080068	-	2.37921e-13	2.14832e-10	-61.4619	AT1G79960	gene,mRNA,protein,CDS,exon;		OK	hypo	OK
Chr1	1192993	1192993	+	0	0	-61.416	AT1G04420	gene,mRNA,protein,exon,CDS;	NAD(P)-linked oxidoreductase superfamily protein	OK	hypo	OK
Chr1	24476329	24476329	+	0	0	-61.3891	AT1G65800	gene,mRNA,protein,exon,CDS;		OK	hypo	OK
Chr1	1683919	1683919	+	0	0	-61.3409	AT1G05630	gene,mRNA,protein,exon,CDS;	Endonuclease/exonuclease/phosphatase family protein	OK	hypo	OK
Chr1	5253972	5253972	+	1.21095e-10	5.77302e-08	-61.2623	AT1G15280	gene,mRNA,protein,exon,CDS;	CASC3/Barentsz eIF4AIII binding	OK	hypo	OK
Chr1	7602266	7602266	+	9.47886e-12	5.94702e-09	-61.2607	AT1G21650	gene,mRNA,protein;AT1G21651	Preprotein translocase SecA family protein	OK	hypo	OK
Chr1	26991467	26991467	+	0	0	-61.25	AT1G71770	gene,mRNA,protein,CDS,exon;		OK	hypo	OK
Chr1	2651438	2651438	+	0	0	-61.0918	AT1G08420	gene,mRNA,protein;	BRI1 suppressor 1 (BSU1)-like 2	OK	hypo	OK
Chr1	22091083	22091083	+	2.30446e-08	5.87353e-06	-61.0577	AT1G59990	gene,mRNA,protein,CDS,exon;		OK	hypo	OK
Chr1	10290528	10290528	+	2.53071e-09	8.4866e-07	-60.9731	AT1G29400	gene,mRNA,protein;	MEI2-like protein 5	OK	hypo	OK
Chr1	24820481	24820481	-	2.011e-06	0.000277703	-60.9626	AT1G66530	gene,mRNA,protein,CDS,exon;		OK	hypo	OK
Chr1	29717830	29717830	-	1.33227e-15	1.87568e-12	-60.9459	AT1G79000	gene,mRNA,protein,CDS,exon;		OK	hypo	OK
Chr1	27029933	27029933	-	1.10827e-05	0.00118244	-60.9108	AT1G71865	gene,mRNA;		OK	hypo	OK
Chr1	18236067	18236067	+	2.93576e-12	2.09613e-09	-60.907	AT1G49300	gene,mRNA,protein;		OK	hypo	OK
Chr1	25143785	25143785	+	4.54194e-08	1.06171e-05	-60.9039	AT1G67210	gene,mRNA,exon,three_prime_UTR;		OK	hypo	OK
Chr1	12160360	12160360	-	2.66787e-13	2.38106e-10	-60.8923	AT1G33530	gene,mRNA,protein,exon,CDS;		OK	hypo	OK
Chr1	26820344	26820344	-	0	0	-60.8866	AT1G71110	gene,mRNA,protein,exon,CDS;		OK	hypo	OK
Chr1	13210158	13210158	+	0	0	-60.565	AT1G35680	gene,mRNA,protein,exon,CDS;		OK	hypo	OK
Chr1	6938650	6938650	+	2.27374e-13	2.06114e-10	-60.5556	AT1G20010	gene,mRNA,protein,CDS,exon;	tubulin beta-5 chain	OK	hypo	OK
Chr1	6368404	6368404	+	8.66607e-12	5.48171e-09	-60.5229	AT1G18490	gene,mRNA,protein,exon,CDS;	Protein of unknown function (DUF1637)	OK	hypo	OK
Chr1	6693684	6693684	-	2.75002e-12	1.97918e-09	-60.4414	AT1G19370	gene,mRNA,protein,CDS,exon;	unknown protein	OK	hypo	OK
Chr1	22346966	22346966	-	0	0	-60.4345	AT1G60670	gene,mRNA,protein;		OK	hypo	OK
Chr1	23533325	23533325	+	7.96696e-13	6.4359e-10	-60.3333	AT1G63450	gene,mRNA,protein,exon,CDS;		OK	hypo	OK
Chr1	6025185	6025185	-	3.33067e-16	5.22857e-13	-60.2991	AT1G17520	gene,mRNA,protein,CDS,exon;	Homeodomain-like/winged-helix DNA-binding family protein	OK	hypo	OK
Chr1	6416783	6416783	-	0	0	-60.2087	AT1G18640	gene,mRNA,protein,CDS,exon;	3-phosphoserine phosphatase	OK	hypo	OK
Chr1	4961068	4961068	+	1.85915e-09	6.45763e-07	-60.1174	AT1G14500	gene,mRNA,protein,exon,CDS;	Ankyrin repeat family protein	OK	hypo	OK
Chr1	20417854	20417854	+	0	0	-60	AT1G54710	gene,mRNA,protein,CDS,exon;		OK	hypo	OK
Chr1	1683920	1683920	-	1.27787e-13	1.22472e-10	-59.9921	AT1G05630	gene,mRNA,protein,exon,CDS;	Endonuclease/exonuclease/phosphatase family protein	OK	hypo	OK
Chr1	6630845	6630845	-	5.55112e-16	8.43503e-13	-59.9668	AT1G19220	gene,mRNA,protein,CDS,exon;	auxin response factor 19	OK	hypo	OK
Chr1	7080464	7080464	-	0	0	-59.944	AT1G20410	gene,mRNA,protein,CDS,exon;	Pseudouridine synthase family protein	OK	hypo	OK
Chr1	4435393	4435393	+	1.54312e-07	3.06941e-05	-59.9265	AT1G12990	gene,mRNA,protein,exon,CDS;	beta-1,4-N-acetylglucosaminyltransferase family protein	OK	hypo	OK
Chr1	12844260	12844260	+	0	0	-59.88	AT1G35115	transposable_element_gene,mRNA,exon;Chr1		OK	hypo	OK
Chr1	20030161	20030161	-	3.81787e-11	2.07808e-08	-59.7985	AT1G53650	gene,mRNA,protein,CDS,exon;		OK	hypo	OK
Chr1	2331752	2331752	-	5.29425e-10	2.13578e-07	-59.7895	AT1G07570	gene,mRNA,protein,CDS,exon;	Protein kinase superfamily protein	OK	hypo	OK
Chr1	27077553	27077553	-	1.03251e-14	1.21655e-11	-59.7645	AT1G71930	gene,mRNA,protein,exon,CDS;		OK	hypo	OK
Chr1	11264089	11264089	+	0	0	-59.6406	AT1G31470	gene,mRNA,protein,CDS,exon;		OK	hypo	OK
Chr1	5671568	5671568	-	9.21485e-15	1.09621e-11	-59.5842	AT1G16570	gene,mRNA,protein,CDS,exon;	UDP-Glycosyltransferase superfamily protein	OK	hypo	OK
Chr1	22346965	22346965	+	7.87097e-05	0.00609932	-59.5238	AT1G60670	gene,mRNA,protein;		OK	hypo	OK
Chr1	29033093	29033093	-	1.37067e-06	0.000200342	-59.5238	AT1G77280	gene,mRNA,protein,CDS,exon;		OK	hypo	OK
Chr1	8743260	8743260	+	3.35194e-06	0.000429414	-59.375	AT1G24706	gene,mRNA,protein,exon,CDS;	THO2	OK	hypo	OK
Chr1	8000021	8000021	+	2.03457e-09	7.00445e-07	-59.3612	AT1G22620	gene,mRNA,protein,CDS,exon;	Phosphoinositide phosphatase family protein	OK	hypo	OK
Chr1	25163944	25163944	-	7.17761e-08	1.58486e-05	-59.2437	AT1G67250	gene,mRNA,protein;		OK	hypo	OK
Chr1	25512219	25512219	-	1.76877e-08	4.66873e-06	-59.1085	AT1G68060	gene,mRNA,protein,CDS,exon;		OK	hypo	OK
Chr1	25143792	25143792	+	4.03804e-09	1.27866e-06	-59.0909	AT1G67210	gene,mRNA,exon,three_prime_UTR;		OK	hypo	OK
Chr1	23864347	23864347	-	5.19488e-07	8.7422e-05	-59.0336	AT1G64300	gene,mRNA,protein,exon,CDS;		OK	hypo	OK
Chr1	20213080	20213080	+	0	0	-59.0333	AT1G54130	gene,mRNA,protein,exon,CDS;		OK	hypo	OK
Chr1	11588305	11588305	-	0	0	-58.9872	AT1G32180	gene,mRNA,protein;		OK	hypo	OK
Chr1	22412495	22412495	+	3.70397e-06	0.000467629	-58.9008	AT1G60890	gene,mRNA,protein,CDS,exon;		OK	hypo	OK
Chr1	7598569	7598569	-	5.04546e-09	1.55208e-06	-58.8235	AT1G21650	gene,mRNA,protein;	Preprotein translocase SecA family protein	OK	hypo	OK
Chr1	7951128	7951128	+	0	0	-58.8235	AT1G22510	gene,mRNA,protein;	RING/U-box protein with domain of unknown function (DUF 1232)	OK	hypo	OK
Chr1	9040431	9040431	+	3.79018e-06	0.000476836	-58.8235	AT1G26150	gene,mRNA,protein,CDS,exon;	proline-rich extensin-like receptor kinase 10	OK	hypo	OK
Chr1	6368405	6368405	-	1.16892e-09	4.28173e-07	-58.6848	AT1G18490	gene,mRNA,protein,exon,CDS;	Protein of unknown function (DUF1637)	OK	hypo	OK
Chr1	30123201	30123201	-	1.17684e-14	1.37521e-11	-58.6781	AT1G80070	gene,mRNA,protein;		OK	hypo	OK
Chr1	6649065	6649065	+	1.47603e-05	0.00150459	-58.6667	AT1G19230	gene,mRNA,protein,exon,CDS;	Riboflavin synthase-like superfamily protein	OK	hypo	OK
Chr1	7092774	7092774	+	5.88418e-15	7.29069e-12	-58.6638	AT1G20460	gene,mRNA,protein;	unknown protein	OK	hypo	OK
Chr1	3471121	3471121	+	3.72261e-11	2.03159e-08	-58.6275	AT1G10522	gene,mRNA,protein,exon,CDS;	unknown protein	OK	hypo	OK
Chr1	11555074	11555074	-	1.2819e-09	4.64906e-07	-58.5714	AT1G32120	gene,mRNA,protein,exon,CDS;		OK	hypo	OK
Chr1	30065362	30065362	-	2.7718e-10	1.20238e-07	-58.5354	AT1G79930	gene,mRNA,protein;		OK	hypo	OK
Chr1	1979943	1979943	+	1.25455e-14	1.46049e-11	-58.5145	AT1G06490	gene,mRNA,protein,exon,CDS;	glucan synthase-like 7	OK	hypo	OK
Chr1	19134821	19134821	+	4.23173e-07	7.31805e-05	-58.5082	AT1G51600	gene,mRNA,protein,exon,CDS;		OK	hypo	OK
Chr1	5121491	5121491	+	1.82354e-12	1.35702e-09	-58.4543	AT1G14850	gene,mRNA,protein,CDS,exon;	nucleoporin 155	OK	hypo	OK
Chr1	25945257	25945257	-	0	0	-58.4212	AT1G69020	gene,mRNA,protein,CDS,exon;		OK	hypo	OK
Chr1	28225178	28225178	+	1.2373e-07	2.535e-05	-58.3784	AT1G75210	gene,mRNA,protein,exon,CDS;		OK	hypo	OK
Chr1	8131428	8131428	+	1.56443e-07	3.10427e-05	-58.3721	AT1G22970	gene,mRNA,protein,CDS,exon;	unknown protein	OK	hypo	OK
Chr1	22294820	22294820	+	4.4631e-12	3.04498e-09	-58.3293	AT1G60505	gene,ncRNA,exon;AT1G60510		OK	hypo	OK
Chr1	17344214	17344214	+	6.75349e-13	5.5494e-10	-58.2076	AT1G47310	gene,mRNA,protein,exon,CDS;		OK	hypo	OK
Chr1	1342300	1342300	-	2.02272e-12	1.49322e-09	-58.1757	AT1G04780	gene,mRNA,protein,CDS,exon;	Ankyrin repeat family protein	OK	hypo	OK
Chr1	3114027	3114027	-	7.52931e-09	2.2115e-06	-58.1159	AT1G09620	gene,mRNA,protein,CDS,exon;	ATP binding	OK	hypo	OK
Chr1	23805744	23805744	-	2.40249e-08	6.09775e-06	-58.0645	AT1G64140	gene,mRNA,protein,CDS,exon;AT1G64142		OK	hypo	OK
Chr1	5307219	5307219	-	5.97386e-07	9.84949e-05	-58.0357	AT1G15440	gene,mRNA,protein,CDS,exon;	periodic tryptophan protein 2	OK	hypo	OK
Chr1	25111600	25111600	-	5.93969e-14	6.06851e-11	-58.0098	AT1G67140	gene,mRNA,protein;		OK	hypo	OK
Chr1	26347289	26347289	+	6.70908e-13	5.51536e-10	-57.9632	AT1G69950	transposable_element_gene,mRNA,exon;Chr1		OK	hypo	OK
Chr1	19503695	19503695	+	2.83048e-11	1.59024e-08	-57.9539	AT1G52360	gene,mRNA,protein;		OK	hypo	OK
Chr1	19114221	19114221	+	8.30556e-11	4.14327e-08	-57.9469	AT1G51538	gene,mRNA,protein,exon,CDS;		OK	hypo	OK
Chr1	4150284	4150284	-	1.64117e-10	7.55431e-08	-57.9132	AT1G12230	gene,mRNA,protein;	Aldolase superfamily protein	OK	hypo	OK
Chr1	25836153	25836153	-	4.26185e-11	2.29239e-08	-57.8947	AT1G68790	gene,mRNA,protein,CDS,exon;		OK	hypo	OK
Chr1	19207022	19207022	-	1.67422e-13	1.56445e-10	-57.7562	AT1G51790	gene,mRNA,protein,CDS,exon;		OK	hypo	OK
Chr1	20769781	20769781	+	1.38712e-10	6.50636e-08	-57.7124	AT1G55590	gene,mRNA,protein,CDS,exon;		OK	hypo	OK
Chr1	1126418	1126418	+	1.93303e-06	0.000268419	-57.6923	AT1G04230	gene,mRNA,protein;	Protein of unknown function (DUF2361)	OK	hypo	OK
Chr1	25314964	25314964	+	0	0	-57.6923	AT1G67550	gene,mRNA,protein,exon,CDS;		OK	hypo	OK
Chr1	27030339	27030339	+	1.0504e-10	5.09495e-08	-57.6437	AT1G71865	gene,mRNA,protein,exon,CDS;		OK	hypo	OK
Chr1	8760285	8760285	-	3.35614e-11	1.85209e-08	-57.6355	AT1G24764	gene,mRNA,protein,CDS,exon;	microtubule-associated proteins 70-2	OK	hypo	OK
Chr1	11750473	11750473	-	8.88178e-16	1.29942e-12	-57.6271	AT1G32500	gene,mRNA,protein,CDS,exon;		OK	hypo	OK
Chr1	7305731	7305731	-	2.22045e-16	3.58774e-13	-57.5758	AT1G20960	gene,mRNA,protein,CDS,exon;	U5 small nuclear ribonucleoprotein helicase, putative	OK	hypo	OK
Chr1	14026715	14026715	-	5.1979e-11	2.73697e-08	-57.5758	AT1G36980	gene,mRNA,protein,exon,CDS;		OK	hypo	OK
Chr1	23805090	23805090	+	7.66454e-07	0.000121956	-57.5758	AT1G64140	gene,mRNA,protein,CDS,exon;AT1G64142		OK	hypo	OK
Chr1	5716241	5716241	-	4.0153e-10	1.67312e-07	-57.5607	AT1G16710	gene,mRNA,protein,exon,CDS;	histone acetyltransferase of the CBP family 12	OK	hypo	OK
Chr1	4149669	4149669	+	3.49633e-08	8.46783e-06	-57.5	AT1G12230	gene,mRNA,protein,exon,CDS;	Aldolase superfamily protein	OK	hypo	OK
Chr1	11696621	11696621	+	6.66134e-16	9.96644e-13	-57.483	AT1G32415	gene,mRNA,protein,exon,CDS;		OK	hypo	OK
Chr1	25277744	25277744	-	1.76482e-11	1.04119e-08	-57.4768	AT1G67480	gene,mRNA,protein,exon,CDS;		OK	hypo	OK
Chr1	4764553	4764553	+	5.50604e-12	3.66248e-09	-57.4473	AT1G13940	gene,mRNA,protein,CDS,exon;	Plant protein of unknown function (DUF863)	OK	hypo	OK
Chr1	8407580	8407580	-	3.33067e-16	5.22857e-13	-57.4468	AT1G23780	gene,mRNA,protein,CDS,exon;	F-box family protein	OK	hypo	OK
Chr1	23759265	23759265	-	0	0	-57.4393	AT1G64040	gene,mRNA,protein,CDS,exon;		OK	hypo	OK
Chr1	10084703	10084703	+	9.4794e-05	0.00711622	-57.4074	AT1G28700	gene,mRNA,protein,CDS,exon;	Nucleotide-diphospho-sugar transferase family protein	OK	hypo	OK
Chr1	10733207	10733207	-	5.79758e-13	4.82938e-10	-57.3608	AT1G30400	gene,mRNA,protein,exon,CDS;		OK	hypo	OK
Chr1	7790680	7790680	+	1.71831e-09	6.02789e-07	-57.1964	AT1G22070	gene,mRNA,protein,exon,CDS;	TGA1A-related gene 3	OK	hypo	OK
Chr1	23589597	23589597	+	5.19371e-07	8.74098e-05	-57.1429	AT1G63640	gene,mRNA,protein,CDS,exon;		OK	hypo	OK
Chr1	4736441	4736441	-	0	0	-57.0697	AT1G13820	gene,mRNA,protein,exon,CDS;	alpha/beta-Hydrolases superfamily protein	OK	hypo	OK
Chr1	3407479	3407479	-	0	0	-56.966	AT1G10390	gene,mRNA,protein,CDS,exon;	Nucleoporin autopeptidase	OK	hypo	OK
Chr1	6595756	6595756	-	1.89883e-10	8.58433e-08	-56.9608	AT1G19100	gene,mRNA,protein,exon,CDS;	Histidine kinase-, DNA gyrase B-, and HSP90-like ATPase family protein	OK	hypo	OK
Chr1	5779559	5779559	+	0	0	-56.9575	AT1G16900	gene,mRNA,protein,CDS,exon;	Alg9-like mannosyltransferase family	OK	hypo	OK
Chr1	28632467	28632467	+	5.9952e-15	7.4084e-12	-56.7093	AT1G76320	gene,mRNA,protein,exon,CDS;		OK	hypo	OK
Chr1	9948200	9948200	+	0	0	-56.6739	AT1G28350	gene,mRNA,protein,exon,CDS;	Nucleotidylyl transferase superfamily protein	OK	hypo	OK
Chr1	10388708	10388708	+	1.42664e-13	1.35293e-10	-56.6667	AT1G29710	gene,mRNA,protein,exon,CDS;	Tetratricopeptide repeat (TPR)-like superfamily protein	OK	hypo	OK
Chr1	14025793	14025793	+	4.0849e-09	1.2911e-06	-56.5957	AT1G36980	gene,mRNA,protein;		OK	hypo	OK
Chr1	8470552	8470552	+	6.94689e-12	4.5052e-09	-56.562	AT1G23950	gene,mRNA,protein,CDS,exon;	Protein of unknown function (DUF626)	OK	hypo	OK
Chr1	22091084	22091084	-	1.68754e-14	1.91277e-11	-56.3845	AT1G59990	gene,mRNA,protein,CDS,exon;		OK	hypo	OK
Chr1	3683180	3683180	+	0	0	-56.2927	AT1G11050	gene,mRNA,protein,exon,CDS;	Protein kinase superfamily protein	OK	hypo	OK
Chr1	26496101	26496101	-	2.04421e-08	5.28909e-06	-56.2331	AT1G70320	gene,mRNA,protein,CDS,exon;		OK	hypo	OK
Chr1	29987086	29987086	+	3.50568e-07	6.22548e-05	-56.1924	AT1G79690	gene,mRNA,protein;		OK	hypo	OK
Chr1	11750472	11750472	+	0	0	-56.1508	AT1G32500	gene,mRNA,protein,CDS,exon;		OK	hypo	OK
Chr1	26716210	26716210	-	0	0	-56.1244	AT1G70850	gene,mRNA,protein,CDS,exon;		OK	hypo	OK
Chr1	1602716	1602716	+	8.69785e-05	0.00662501	-56.1111	AT1G05460	gene,mRNA,protein,CDS,exon;	P-loop containing nucleoside triphosphate hydrolases superfamily protein	OK	hypo	OK
Chr1	7205186	7205186	-	2.10111e-05	0.00202601	-56.1039	AT1G20750	gene,mRNA,protein,CDS,exon;	RAD3-like DNA-binding helicase protein	OK	hypo	OK
Chr1	1791022	1791022	+	6.58653e-11	3.37729e-08	-56.0933	AT1G05910	gene,mRNA,protein,exon,CDS;	cell division cycle protein 48-related / CDC48-related	OK	hypo	OK
Chr1	6710601	6710601	-	0	0	-56.0606	AT1G19394	gene,mRNA,protein,exon,CDS;AT1G19396	unknown protein	OK	hypo	OK
Chr1	1948972	1948972	-	7.94254e-13	6.41948e-10	-56	AT1G06390	gene,mRNA,protein,exon,CDS;	GSK3/SHAGGY-like protein kinase 1	OK	hypo	OK
Chr1	23854075	23854075	+	1.659e-06	0.000235469	-56	AT1G64280	gene,mRNA,protein,CDS,exon;		OK	hypo	OK
Chr1	11750530	11750530	-	2.98731e-09	9.81489e-07	-55.8824	AT1G32500	gene,mRNA,protein,CDS,exon;		OK	hypo	OK
Chr1	28124574	28124574	+	5.40679e-14	5.57798e-11	-55.7998	AT1G74860	gene,mRNA,protein;		OK	hypo	OK
Chr1	24477900	24477900	-	1.5884e-12	1.19892e-09	-55.7685	AT1G65810	gene,mRNA,protein,CDS,exon;		OK	hypo	OK
Chr1	3314310	3314310	+	2.99071e-10	1.28499e-07	-55.6957	AT1G10130	gene,mRNA,protein;	endoplasmic reticulum-type calcium-transporting ATPase 3	OK	hypo	OK
Chr1	25352749	25352749	+	3.09189e-05	0.00280149	-55.6802	AT1G67640	gene,mRNA,protein,CDS,exon;		OK	hypo	OK
Chr1	25460206	25460206	+	1.96481e-10	8.85557e-08	-55.6022	AT1G67890	gene,mRNA,protein,exon,CDS;		OK	hypo	OK
Chr1	29040781	29040781	-	3.67484e-14	3.91684e-11	-55.5919	AT1G77300	gene,mRNA,protein,CDS,exon,three_prime_UTR;		OK	hypo	OK
Chr1	2777827	2777827	+	9.19227e-06	0.00101033	-55.5556	AT1G08720	gene,mRNA,protein,exon,CDS;	Protein kinase superfamily protein	OK	hypo	OK
Chr1	23758881	23758881	-	4.95091e-07	8.38493e-05	-55.5556	AT1G64040	gene,mRNA,protein,CDS,exon;		OK	hypo	OK
Chr1	26497659	26497659	-	3.27516e-14	3.51924e-11	-55.5398	AT1G70320	gene,mRNA,protein,CDS,exon;		OK	hypo	OK
Chr1	4435112	4435112	+	1.25455e-14	1.46049e-11	-55.2683	AT1G12990	gene,mRNA,protein,exon,CDS;	beta-1,4-N-acetylglucosaminyltransferase family protein	OK	hypo	OK
Chr1	29151539	29151539	-	0	0	-55.1724	AT1G77590	gene,mRNA,protein,CDS,exon;		OK	hypo	OK
Chr1	17955817	17955817	+	1.22894e-09	4.47674e-07	-55.1196	AT1G48570	gene,mRNA,protein;		OK	hypo	OK
Chr1	30366997	30366997	+	4.77396e-15	6.05298e-12	-55.0987	AT1G80810	gene,mRNA,protein,exon,CDS;		OK	hypo	OK
Chr1	22213180	22213180	-	2.03306e-10	9.13312e-08	-55.0926	AT1G60230	gene,mRNA,protein,CDS,exon;		OK	hypo	OK
Chr1	815406	815406	+	9.99201e-15	1.18144e-11	-55.0021	AT1G03310	gene,mRNA,protein,exon,CDS;	debranching enzyme 1	OK	hypo	OK
Chr1	6548577	6548577	+	3.77273e-05	0.00330933	-55	AT1G18950	gene,mRNA,protein;	DDT domain superfamily	OK	hypo	OK
Chr1	314067	314067	-	0	0	-54.8792	AT1G01910	gene,mRNA,protein;	P-loop containing nucleoside triphosphate hydrolases superfamily protein	OK	hypo	OK
Chr1	24864232	24864232	-	7.55285e-13	6.1421e-10	-54.8644	AT1G66670	gene,mRNA,protein,CDS,exon;		OK	hypo	OK
Chr1	24371953	24371953	-	4.67957e-09	1.45536e-06	-54.8423	AT1G65560	gene,mRNA,protein,CDS,exon;		OK	hypo	OK
Chr1	815407	815407	-	1.38873e-06	0.000202589	-54.7619	AT1G03310	gene,mRNA,protein,exon,CDS;	debranching enzyme 1	OK	hypo	OK
Chr1	19609557	19609557	-	0	0	-54.76	AT1G52640	gene,mRNA,protein,CDS,exon;		OK	hypo	OK
Chr1	17828286	17828286	-	4.54192e-13	3.85549e-10	-54.7078	AT1G48270	gene,mRNA,three_prime_UTR,exon;		OK	hypo	OK
Chr1	29040780	29040780	+	3.44491e-09	1.1126e-06	-54.7059	AT1G77300	gene,mRNA,protein,CDS,exon,three_prime_UTR;		OK	hypo	OK
Chr1	1796029	1796029	+	5.8796e-08	1.3323e-05	-54.7038	AT1G05910	gene,mRNA,protein;	cell division cycle protein 48-related / CDC48-related	OK	hypo	OK
Chr1	1371446	1371446	-	0	0	-54.7025	AT1G04860	gene,mRNA,protein,CDS,exon;	ubiquitin-specific protease 2	OK	hypo	OK
Chr1	10643282	10643282	+	0	0	-54.6958	AT1G30240	gene,mRNA,protein,CDS,exon;		OK	hypo	OK
Chr1	30226594	30226594	+	7.30532e-10	2.83157e-07	-54.6875	AT1G80400	gene,mRNA,protein,exon,CDS;		OK	hypo	OK
Chr1	7819583	7819583	+	4.58453e-06	0.00056103	-54.6798	AT1G22150	gene,mRNA,protein;	3	OK	hypo	OK
Chr1	6761774	6761774	+	1.74971e-13	1.62719e-10	-54.6528	AT1G19520	gene,mRNA,protein,exon,CDS;	pentatricopeptide (PPR) repeat-containing protein	OK	hypo	OK
Chr1	26633654	26633654	+	6.9178e-13	5.67433e-10	-54.6474	AT1G70630	gene,mRNA,protein,exon,CDS;		OK	hypo	OK
Chr1	29679661	29679661	-	2.49256e-06	0.000333289	-54.6453	AT1G78930	gene,mRNA,protein,CDS,exon;		OK	hypo	OK
Chr1	28262061	28262061	+	7.17981e-13	5.86324e-10	-54.5932	AT1G75310	gene,mRNA,protein,exon,CDS;		OK	hypo	OK
Chr1	28737725	28737725	-	3.1494e-10	1.3452e-07	-54.5675	AT1G76580	gene,mRNA,protein,exon,CDS;		OK	hypo	OK
Chr1	9941476	9941476	+	8.85796e-09	2.54991e-06	-54.5055	AT1G28340	gene,mRNA,protein;	receptor like protein 4	OK	hypo	OK
Chr1	5330416	5330416	-	1.81244e-12	1.34984e-09	-54.4709	AT1G15510	gene,mRNA,protein,exon,CDS;	Tetratricopeptide repeat (TPR)-like superfamily protein	OK	hypo	OK
Chr1	4736440	4736440	+	3.15928e-05	0.0028513	-54.4444	AT1G13820	gene,mRNA,protein,exon,CDS;	alpha/beta-Hydrolases superfamily protein	OK	hypo	OK
Chr1	9796875	9796875	+	2.33322e-11	1.33583e-08	-54.4209	AT1G28090	gene,mRNA,protein,exon,CDS;	Polynucleotide adenylyltransferase family protein	OK	hypo	OK
Chr1	20417855	20417855	-	0	0	-54.4	AT1G54710	gene,mRNA,protein,CDS,exon;		OK	hypo	OK
Chr1	27822505	27822505	+	1.1865e-12	9.24127e-10	-54.3927	AT1G73980	gene,mRNA,protein;		OK	hypo	OK
Chr1	28621447	28621447	-	0	0	-54.3256	AT1G76280	gene,mRNA,protein,CDS,exon;		OK	hypo	OK
Chr1	4844029	4844029	-	2.85927e-12	2.04903e-09	-54.2764	AT1G14170	gene,mRNA,protein,CDS,exon;	RNA-binding KH domain-containing protein	OK	hypo	OK
Chr1	8131429	8131429	-	2.08211e-08	5.37196e-06	-54.2576	AT1G22970	gene,mRNA,protein,CDS,exon;	unknown protein	OK	hypo	OK
Chr1	1508307	1508307	+	6.79445e-10	2.66032e-07	-54.2517	AT1G05200	gene,mRNA,protein,exon,CDS;	glutamate receptor 3.4	OK	hypo	OK
Chr1	23584002	23584002	-	1.56087e-06	0.000223478	-54.2453	AT1G63610	gene,mRNA,protein,CDS,exon;		OK	hypo	OK
Chr1	3864763	3864763	-	2.48794e-06	0.000332779	-54.2284	AT1G11480	gene,mRNA,protein,CDS,exon;	eukaryotic translation initiation factor-related	OK	hypo	OK
Chr1	27502646	27502646	-	1.11022e-15	1.59463e-12	-54.1799	AT1G73140	gene,mRNA,protein,CDS,exon;		OK	hypo	OK
Chr1	1346834	1346834	-	1.20452e-08	3.34529e-06	-54.1667	AT1G04790	gene,mRNA,protein,exon,CDS;	RING/U-box superfamily protein	OK	hypo	OK
Chr1	7001654	7001654	+	9.87037e-08	2.08962e-05	-54.1667	AT1G20200	gene,mRNA,protein,CDS,exon;	PAM domain (PCI/PINT associated module) protein	OK	hypo	OK
Chr1	10813001	10813001	+	0	0	-54.1497	AT1G30520	gene,mRNA,protein,exon,CDS;		OK	hypo	OK
Chr1	9474343	9474343	-	1.00102e-09	3.73515e-07	-54.1209	AT1G27280	gene,mRNA,protein,exon,CDS;	Paired amphipathic helix (PAH2) superfamily protein	OK	hypo	OK
Chr1	26639517	26639517	+	3.13138e-12	2.2174e-09	-54.1026	AT1G70650	gene,mRNA,protein,exon,CDS;		OK	hypo	OK
Chr1	5418835	5418835	+	1.11022e-16	1.86814e-13	-54.1017	AT1G15750	gene,mRNA,protein,CDS,exon;	Transducin family protein / WD-40 repeat family protein	OK	hypo	OK
Chr1	3505196	3505196	+	1.65328e-06	0.000234747	-54.0909	AT1G10600	gene,mRNA,exon,three_prime_UTR;	associated molecule with the SH3 domain of STAM 2	OK	hypo	OK
Chr1	6357468	6357468	-	1.0054e-11	6.26849e-09	-53.9729	AT1G18470	gene,mRNA,protein,CDS,exon;	Transmembrane Fragile-X-F-associated protein	OK	hypo	OK
Chr1	5239196	5239196	+	5.01831e-08	1.15936e-05	-53.9216	AT1G15215	gene,mRNA,protein,exon,CDS;	BEST Arabidopsis thaliana protein match is: sequence-specific DNA binding transcription factors	OK	hypo	OK
Chr1	9985577	9985577	+	2.22045e-16	3.58774e-13	-53.882	AT1G28420	gene,mRNA,protein,exon,CDS;	homeobox-1	OK	hypo	OK
Chr1	17809656	17809656	-	3.91354e-13	3.37317e-10	-53.7751	AT1G48240	gene,mRNA,protein,CDS,exon;		OK	hypo	OK
Chr1	29141857	29141857	-	3.52279e-09	1.13484e-06	-53.7546	AT1G77550	gene,mRNA,protein,CDS,exon;		OK	hypo	OK
Chr1	28135274	28135274	+	6.23945e-14	6.34672e-11	-53.723	AT1G74900	gene,mRNA,protein;		OK	hypo	OK
Chr1	3815267	3815267	-	8.54872e-15	1.02488e-11	-53.492	AT1G11340	gene,mRNA,protein,CDS,exon;	S-locus lectin protein kinase family protein	OK	hypo	OK
Chr1	23548473	23548473	-	2.22045e-16	3.58774e-13	-53.4434	AT1G63490	gene,mRNA,protein;		OK	hypo	OK
Chr1	7246196	7246196	-	0	0	-53.4344	AT1G20840	gene,mRNA,protein,CDS,exon;	tonoplast monosaccharide transporter1	OK	hypo	OK
Chr1	30262917	30262917	-	3.6123e-08	8.71161e-06	-53.3824	AT1G80490	gene,mRNA,protein,CDS,exon;		OK	hypo	OK
Chr1	6761892	6761892	+	0	0	-53.3226	AT1G19520	gene,mRNA,protein,exon,CDS;	pentatricopeptide (PPR) repeat-containing protein	OK	hypo	OK
Chr1	10771700	10771700	+	8.76203e-09	2.52485e-06	-53.2828	AT1G30460	gene,mRNA,protein,CDS,exon;		OK	hypo	OK
Chr1	12933551	12933551	-	1.91543e-09	6.63379e-07	-53.268	AT1G35250	gene,mRNA,protein,CDS,exon;		OK	hypo	OK
Chr1	9716604	9716604	-	4.13497e-07	7.18067e-05	-53.268	AT1G27900	gene,mRNA,protein,CDS,exon;	RNA helicase family protein	OK	hypo	OK
Chr1	4249850	4249850	-	1.24798e-10	5.92664e-08	-53.2662	AT1G12460	gene,mRNA,protein,exon,CDS;	Leucine-rich repeat protein kinase family protein	OK	hypo	OK
Chr1	30262916	30262916	+	8.42986e-10	3.20877e-07	-53.2072	AT1G80490	gene,mRNA,protein,CDS,exon;		OK	hypo	OK
Chr1	11705412	11705412	-	0	0	-53.1862	AT1G32430	gene,mRNA,protein,CDS,exon;		OK	hypo	OK
Chr1	3163556	3163556	-	3.57439e-07	6.33078e-05	-53.1469	AT1G09770	gene,mRNA,protein,exon,CDS;	cell division cycle 5	OK	hypo	OK
Chr1	26716207	26716207	-	1.11022e-16	1.86814e-13	-53.1346	AT1G70850	gene,mRNA,protein,CDS,exon;		OK	hypo	OK
Chr1	11757503	11757503	+	2.25264e-13	2.04452e-10	-53.1331	AT1G32510	gene,mRNA,protein,exon,CDS;		OK	hypo	OK
Chr1	16135286	16135286	+	2.15647e-09	7.37061e-07	-53.0769	AT1G42980	gene,mRNA,protein;		OK	hypo	OK
Chr1	6532257	6532257	+	1.88738e-15	2.59401e-12	-53.0506	AT1G18900	gene,mRNA,protein,exon,CDS;	Pentatricopeptide repeat (PPR) superfamily protein	OK	hypo	OK
Chr1	3602945	3602945	+	1.7895e-09	6.24436e-07	-52.9412	AT1G10820	gene,mRNA,protein;	Protein of unknown function (DUF3755)	OK	hypo	OK
Chr1	26639508	26639508	+	7.78582e-09	2.27618e-06	-52.9004	AT1G70650	gene,mRNA,protein,exon,CDS;		OK	hypo	OK
Chr1	4185294	4185294	-	3.02239e-08	7.46268e-06	-52.8774	AT1G12300	gene,mRNA,protein,CDS,exon;	Tetratricopeptide repeat (TPR)-like superfamily protein	OK	hypo	OK
Chr1	22509570	22509570	-	1.16351e-13	1.12386e-10	-52.8733	AT1G61100	gene,mRNA,protein,CDS,exon;		OK	hypo	OK
Chr1	24528027	24528027	-	2.498e-14	2.74395e-11	-52.849	AT1G65920	gene,mRNA,protein,CDS,exon;		OK	hypo	OK
Chr1	25460207	25460207	-	8.77076e-15	1.0498e-11	-52.808	AT1G67890	gene,mRNA,protein,exon,CDS;		OK	hypo	OK
Chr1	7828674	7828674	-	5.05075e-11	2.6667e-08	-52.6728	AT1G22180	gene,mRNA,protein,CDS,exon;	Sec14p-like phosphatidylinositol transfer family protein	OK	hypo	OK
Chr1	20395919	20395919	-	2.80198e-12	2.01344e-09	-52.6506	AT1G54610	gene,mRNA,protein,CDS,exon;Chr1		OK	hypo	OK
Chr1	30205656	30205656	-	0	0	-52.6398	AT1G80350	gene,mRNA,protein,CDS,exon;		OK	hypo	OK
Chr1	1264016	1264016	+	3.3005e-06	0.000423984	-52.6395	AT1G04600	gene,mRNA,protein;	myosin XI A	OK	hypo	OK
Chr1	4435394	4435394	-	1.75896e-06	0.000247564	-52.6114	AT1G12990	gene,mRNA,protein,exon,CDS;	beta-1,4-N-acetylglucosaminyltransferase family protein	OK	hypo	OK
Chr1	25790107	25790107	+	2.85333e-07	5.22585e-05	-52.6098	AT1G68690	gene,mRNA,protein,exon,CDS;		OK	hypo	OK
Chr1	2881540	2881540	+	5.58235e-10	2.23422e-07	-52.5926	AT1G08960	gene,mRNA,protein,exon,CDS;	cation exchanger 11	OK	hypo	OK
Chr1	16135287	16135287	-	3.47158e-07	6.1744e-05	-52.5794	AT1G42980	gene,mRNA,protein;		OK	hypo	OK
Chr1	7820720	7820720	+	9.45236e-11	4.64148e-08	-52.5356	AT1G22150	gene,mRNA,protein,exon,CDS;	3	OK	hypo	OK
Chr1	25257515	25257515	+	6.106e-12	4.01264e-09	-52.4894	AT1G67420	gene,mRNA,protein;		OK	hypo	OK
Chr1	4844735	4844735	-	2.66753e-05	0.00247576	-52.4814	AT1G14170	gene,mRNA,protein,CDS,exon;	RNA-binding KH domain-containing protein	OK	hypo	OK
Chr1	10425216	10425216	+	3.60822e-13	3.13632e-10	-52.3742	AT1G29770	gene,mRNA,protein,exon,CDS;	Haloacid dehalogenase-like hydrolase (HAD) superfamily protein	OK	hypo	OK
Chr1	7591741	7591741	-	1.11471e-10	5.37941e-08	-52.3497	AT1G21640	gene,mRNA,protein,exon,CDS;	NAD kinase 2	OK	hypo	OK
Chr1	3113111	3113111	+	3.17502e-09	1.03507e-06	-52.2974	AT1G09620	gene,mRNA,protein;	ATP binding	OK	hypo	OK
Chr1	25836152	25836152	+	2.85286e-07	5.22535e-05	-52.2287	AT1G68790	gene,mRNA,protein,CDS,exon;		OK	hypo	OK
Chr1	3601158	3601158	-	1.4181e-11	8.52545e-09	-52.2059	AT1G10820	gene,mRNA,three_prime_UTR,exon;	Protein of unknown function (DUF3755)	OK	hypo	OK
Chr1	29685850	29685850	+	2.17413e-06	0.000296717	-52.1635	AT1G78950	gene,mRNA,protein,CDS,exon;		OK	hypo	OK
Chr1	6442191	6442191	+	7.16871e-13	5.85805e-10	-52.1287	AT1G18700	gene,mRNA,protein,exon,CDS;	DNAJ heat shock N-terminal domain-containing protein	OK	hypo	OK
Chr1	5779560	5779560	-	6.77923e-10	2.65464e-07	-52.1256	AT1G16900	gene,mRNA,protein,CDS,exon;	Alg9-like mannosyltransferase family	OK	hypo	OK
Chr1	8157881	8157881	+	4.52971e-14	4.74057e-11	-52.1099	AT1G23030	gene,mRNA,protein,exon,CDS;	ARM repeat superfamily protein	OK	hypo	OK
Chr1	4510196	4510196	+	5.55112e-16	8.43503e-13	-52.1018	AT1G13210	gene,mRNA,protein;	autoinhibited Ca2+/ATPase II	OK	hypo	OK
Chr1	10682166	10682166	+	1.51144e-08	4.07975e-06	-52.0927	AT1G30320	gene,mRNA,protein,exon,CDS;		OK	hypo	OK
Chr1	29654371	29654371	-	1.26963e-11	7.72834e-09	-52.0907	AT1G78880	gene,mRNA,protein,CDS,exon;AT1G78882		OK	hypo	OK
Chr1	26225156	26225156	+	5.2317e-12	3.49648e-09	-52.0803	AT1G69710	gene,mRNA,protein,exon,CDS;		OK	hypo	OK
Chr1	29156936	29156936	-	2.51489e-09	8.44118e-07	-52.0312	AT1G77600	gene,mRNA,protein,CDS,exon;		OK	hypo	OK
Chr1	4575595	4575595	-	0	0	-52.0253	AT1G13350	gene,mRNA,protein,CDS,exon;	Protein kinase superfamily protein	OK	hypo	OK
Chr1	2748785	2748785	-	6.88338e-15	8.40207e-12	-51.9697	AT1G08640	gene,mRNA,protein;	Chloroplast J-like domain 1	OK	hypo	OK
Chr1	1371092	1371092	+	7.99798e-06	0.00089949	-51.9608	AT1G04860	gene,mRNA,protein,CDS,exon;	ubiquitin-specific protease 2	OK	hypo	OK
Chr1	24066287	24066287	-	7.13001e-05	0.00561481	-51.9608	AT1G64790	gene,mRNA,protein,CDS,exon;		OK	hypo	OK
Chr1	29166661	29166661	+	1.78977e-06	0.000251156	-51.9608	AT1G77610	gene,mRNA,protein,exon,CDS;		OK	hypo	OK
Chr1	26109182	26109182	-	2.66792e-06	0.000353187	-51.9444	AT1G69450	gene,mRNA,protein,CDS,exon;		OK	hypo	OK
Chr1	7620977	7620977	+	2.48625e-06	0.000332581	-51.8854	AT1G21700	gene,mRNA,protein,CDS,exon;	SWITCH/sucrose nonfermenting 3C	OK	hypo	OK
Chr1	8090843	8090843	-	5.44009e-14	5.60921e-11	-51.875	AT1G22870	gene,mRNA,protein,exon,CDS;	Protein kinase family protein with ARM repeat domain	OK	hypo	OK
Chr1	5769554	5769554	+	7.27973e-13	5.93959e-10	-51.8579	AT1G16858	gene,mRNA,exon,three_prime_UTR;AT1G16860	conserved peptide upstream open reading frame 55	OK	hypo	OK
Chr1	4613339	4613339	+	1.21383e-05	0.00127506	-51.8519	AT1G13450	gene,mRNA,protein,CDS,exon,three_prime_UTR;	Homeodomain-like superfamily protein	OK	hypo	OK
Chr1	12266421	12266421	+	0.000101697	0.0075325	-51.8519	AT1G33810	gene,mRNA,protein;		OK	hypo	OK
Chr1	11263198	11263198	-	1.50411e-10	6.98163e-08	-51.8421	AT1G31460	gene,mRNA,five_prime_UTR,exon;AT1G31470		OK	hypo	OK
Chr1	11426356	11426356	-	4.17996e-08	9.87521e-06	-51.7758	AT1G31840	gene,mRNA,protein,exon,CDS;		OK	hypo	OK
Chr1	7328837	7328837	-	2.5608e-06	0.00034086	-51.7054	AT1G20980	gene,mRNA,protein,exon,CDS;	squamosa promoter binding protein-like 14	OK	hypo	OK
Chr1	5716223	5716223	+	6.89402e-10	2.69445e-07	-51.634	AT1G16710	gene,mRNA,protein,exon,CDS;	histone acetyltransferase of the CBP family 12	OK	hypo	OK
Chr1	10446409	10446409	-	5.55279e-10	2.2272e-07	-51.6284	AT1G29840	gene,mRNA,protein;	alpha/beta-Hydrolases superfamily protein	OK	hypo	OK
Chr1	8504989	8504989	+	0	0	-51.6047	AT1G24030	gene,mRNA,protein,exon,CDS;AT1G24040	Protein kinase superfamily protein	OK	hypo	OK
Chr1	30366983	30366983	+	1.38469e-11	8.34998e-09	-51.5536	AT1G80810	gene,mRNA,protein,exon,CDS;		OK	hypo	OK
Chr1	10280743	10280743	-	3.43701e-06	0.000438702	-51.5152	AT1G29370	gene,mRNA,protein,CDS,exon;	Kinase-related protein of unknown function (DUF1296)	OK	hypo	OK
Chr1	4501271	4501271	+	6.22391e-13	5.14511e-10	-51.4887	AT1G13190	gene,mRNA,protein,exon,CDS;	RNA-binding (RRM/RBD/RNP motifs) family protein	OK	hypo	OK
Chr1	3835130	3835130	-	4.9839e-11	2.63668e-08	-51.4529	AT1G11390	gene,mRNA,protein,CDS,exon;	Protein kinase superfamily protein	OK	hypo	OK
Chr1	9297058	9297058	+	0	0	-51.4286	AT1G26830	gene,mRNA,protein,exon,CDS;	cullin 3	OK	hypo	OK
Chr1	8613091	8613091	+	1.94933e-12	1.44452e-09	-51.3889	AT1G24290	gene,mRNA,protein,CDS,exon;	AAA-type ATPase family protein	OK	hypo	OK
Chr1	6649053	6649053	+	2.42421e-08	6.14571e-06	-51.3344	AT1G19230	gene,mRNA,protein,exon,CDS;	Riboflavin synthase-like superfamily protein	OK	hypo	OK
Chr1	4149653	4149653	+	2.66318e-06	0.000352672	-51.2903	AT1G12230	gene,mRNA,protein,exon,CDS;	Aldolase superfamily protein	OK	hypo	OK
Chr1	2778074	2778074	-	1.49758e-08	4.04737e-06	-51.2632	AT1G08720	gene,mRNA,protein,exon,CDS;	Protein kinase superfamily protein	OK	hypo	OK
Chr1	9185762	9185762	+	9.24227e-06	0.00101471	-51.2308	AT1G26580	gene,mRNA,protein,exon,CDS;	FUNCTIONS IN: molecular_function unknown	OK	hypo	OK
Chr1	12648763	12648763	+	3.93352e-13	3.38723e-10	-51.2126	AT1G34550	gene,mRNA,protein;		OK	hypo	OK
Chr1	27890238	27890238	+	5.25634e-08	1.20749e-05	-51.1989	AT1G74160	gene,mRNA,protein;		OK	hypo	OK
Chr1	6321454	6321454	+	4.31108e-08	1.01442e-05	-51.1612	AT1G18370	gene,mRNA,protein,CDS,exon;	ATP binding microtubule motor family protein	OK	hypo	OK
Chr1	6422431	6422431	-	7.15838e-12	4.6229e-09	-51.1285	AT1G18660	gene,mRNA,protein,exon,CDS;	zinc finger (C3HC4-type RING finger) family protein	OK	hypo	OK
Chr1	18864440	18864440	+	7.11416e-07	0.000114335	-51.1264	AT1G50890	gene,mRNA,protein;		OK	hypo	OK
Chr1	5180944	5180944	-	2.7193e-10	1.18239e-07	-51.0638	AT1G15040	gene,mRNA,protein,CDS,exon;	Class I glutamine amidotransferase-like superfamily protein	OK	hypo	OK
Chr1	7328836	7328836	+	2.36094e-10	1.04213e-07	-51.0563	AT1G20980	gene,mRNA,protein,exon,CDS;	squamosa promoter binding protein-like 14	OK	hypo	OK
Chr1	5307899	5307899	+	8.28367e-11	4.13403e-08	-51.004	AT1G15440	gene,mRNA,protein,CDS,exon;	periodic tryptophan protein 2	OK	hypo	OK
Chr1	29822451	29822451	+	6.04302e-07	9.94092e-05	-51.0025	AT1G79280	gene,mRNA,protein;		OK	hypo	OK
Chr1	6722442	6722442	+	0	0	-50.9502	AT1G19420	pseudogene,pseudogenic_transcript,pseudogenic_exon;	pseudogene, CHP-rich zinc finger protein	OK	hypo	OK
Chr1	8760048	8760048	-	0	0	-50.9454	AT1G24764	gene,mRNA,protein;	microtubule-associated proteins 70-2	OK	hypo	OK
Chr1	24475797	24475797	+	6.22224e-11	3.21366e-08	-50.9418	AT1G65800	gene,mRNA,protein,exon,CDS;		OK	hypo	OK
Chr1	3654446	3654446	-	2.10831e-13	1.92486e-10	-50.9205	AT1G10930	gene,mRNA,protein;	DNA helicase (RECQl4A)	OK	hypo	OK
Chr1	11744585	11744585	-	2.10942e-15	2.86617e-12	-50.915	AT1G32490	gene,mRNA,protein,CDS,exon;		OK	hypo	OK
Chr1	6133435	6133435	-	1.32072e-12	1.01816e-09	-50.8772	AT1G17820	gene,mRNA,protein,CDS,exon;	Putative integral membrane protein conserved region (DUF2404)	OK	hypo	OK
Chr1	26234163	26234163	-	8.9595e-14	8.85301e-11	-50.8403	AT1G69740	gene,mRNA,protein;		OK	hypo	OK
Chr1	7092775	7092775	-	1.2493e-11	7.61588e-09	-50.7598	AT1G20460	gene,mRNA,protein;	unknown protein	OK	hypo	OK
Chr1	25277749	25277749	-	4.1509e-09	1.30991e-06	-50.7181	AT1G67480	gene,mRNA,protein,exon,CDS;		OK	hypo	OK
Chr1	2569678	2569678	+	5.68465e-10	2.27074e-07	-50.7143	AT1G08190	gene,mRNA,protein;	vacuolar protein sorting 41	OK	hypo	OK
Chr1	10771701	10771701	-	0	0	-50.7016	AT1G30460	gene,mRNA,protein,CDS,exon;		OK	hypo	OK
Chr1	1329567	1329567	+	3.42173e-08	8.31054e-06	-50.6944	AT1G04730	gene,mRNA,protein,CDS,exon;	P-loop containing nucleoside triphosphate hydrolases superfamily protein	OK	hypo	OK
Chr1	25211233	25211233	+	0	0	-50.6845	AT1G67325	gene,mRNA,protein,CDS,exon;		OK	hypo	OK
Chr1	2075399	2075399	+	0	0	-50.5867	AT1G06750	gene,mRNA,protein,exon,CDS;	P-loop containing nucleoside triphosphate hydrolases superfamily protein	OK	hypo	OK
Chr1	4183526	4183526	-	9.99201e-16	1.44584e-12	-50.5786	AT1G12300	gene,mRNA,three_prime_UTR,exon;	Tetratricopeptide repeat (TPR)-like superfamily protein	OK	hypo	OK
Chr1	25277743	25277743	+	0	0	-50.5758	AT1G67480	gene,mRNA,protein,exon,CDS;		OK	hypo	OK
Chr1	19997354	19997354	-	6.01972e-07	9.91008e-05	-50.555	AT1G53590	gene,mRNA,protein;		OK	hypo	OK
Chr1	4369137	4369137	-	2.67841e-12	1.93291e-09	-50.5495	AT1G12820	gene,mRNA,protein,CDS,exon;	auxin signaling F-box 3	OK	hypo	OK
Chr1	23548472	23548472	+	9.41048e-10	3.53762e-07	-50.4814	AT1G63490	gene,mRNA,protein;		OK	hypo	OK
Chr1	5499991	5499991	+	3.84017e-08	9.18509e-06	-50.4762	AT1G16020	gene,mRNA,protein,exon,CDS;	Protein of unknown function (DUF1712)	OK	hypo	OK
Chr1	5009498	5009498	-	1.85163e-07	3.58962e-05	-50.4607	AT1G14610	gene,mRNA,protein,CDS,exon;	valyl-tRNA synthetase / valine--tRNA ligase (VALRS)	OK	hypo	OK
Chr1	7218130	7218130	+	9.80149e-12	6.12657e-09	-50.4421	AT1G20780	gene,mRNA,protein,exon,CDS;	senescence-associated E3 ubiquitin ligase 1	OK	hypo	OK
Chr1	7328843	7328843	+	2.39918e-10	1.05739e-07	-50.4274	AT1G20980	gene,mRNA,protein,exon,CDS;	squamosa promoter binding protein-like 14	OK	hypo	OK
Chr1	4257580	4257580	-	8.96623e-09	2.57687e-06	-50.3805	AT1G12480	gene,mRNA,protein,CDS,exon;	C4-dicarboxylate transporter/malic acid transport protein	OK	hypo	OK
Chr1	30247825	30247825	+	5.00108e-09	1.54012e-06	-50.3636	AT1G80460	gene,mRNA,protein,CDS,exon;		OK	hypo	OK
Chr1	10425217	10425217	-	3.55768e-09	1.14438e-06	-50.3239	AT1G29770	gene,mRNA,protein,exon,CDS;	Haloacid dehalogenase-like hydrolase (HAD) superfamily protein	OK	hypo	OK
Chr1	7156224	7156224	-	1.55787e-07	3.09341e-05	-50.267	AT1G20640	gene,mRNA,protein,exon,CDS;	Plant regulator RWP-RK family protein	OK	hypo	OK
Chr1	28097310	28097310	-	4.88373e-06	0.000592525	-50.2381	AT1G74780	gene,mRNA,protein,exon,CDS;		OK	hypo	OK
Chr1	27872202	27872202	-	9.43123e-09	2.69584e-06	-50.1701	AT1G74120	gene,mRNA,protein,CDS,exon;		OK	hypo	OK
Chr1	29729397	29729397	+	5.57137e-09	1.69483e-06	-50.1515	AT1G79020	gene,mRNA,protein;		OK	hypo	OK
Chr1	1346833	1346833	+	1.64468e-12	1.23812e-09	-50.1457	AT1G04790	gene,mRNA,protein,exon,CDS;	RING/U-box superfamily protein	OK	hypo	OK
Chr1	7001655	7001655	-	0	0	-50.1375	AT1G20200	gene,mRNA,protein,CDS,exon;	PAM domain (PCI/PINT associated module) protein	OK	hypo	OK
Chr1	5925217	5925217	+	0	0	-50.1258	AT1G17290	gene,mRNA,protein;	alanine aminotransferas	OK	hypo	OK
Chr1	3587781	3587781	-	5.51781e-14	5.68301e-11	-50.0772	AT1G10760	gene,mRNA,protein,CDS,exon;	Pyruvate phosphate dikinase, PEP/pyruvate binding domain	OK	hypo	OK
Chr1	6086102	6086102	+	2.45604e-08	6.21916e-06	-50.0625	AT1G17690	gene,mRNA,protein;	FUNCTIONS IN: molecular_function unknown	OK	hypo	OK
Chr1	8047917	8047917	+	9.01649e-11	4.4499e-08	-50.0472	AT1G22730	gene,mRNA,protein,exon,CDS;	MA3 domain-containing protein	OK	hypo	OK
Chr1	23804093	23804093	-	6.51856e-12	4.25503e-09	-50.0128	AT1G64140	gene,mRNA,protein,CDS,exon;AT1G64142		OK	hypo	OK
Chr1	2372287	2372287	+	6.51606e-05	0.0052076	-50	AT1G07670	gene,mRNA,protein;	endomembrane-type CA-ATPase 4	OK	hypo	OK
Chr1	6649660	6649660	+	1.91158e-05	0.00187184	-50	AT1G19240	gene,mRNA,protein,CDS,exon;	unknown protein	OK	hypo	OK
Chr1	8157870	8157870	+	2.68785e-13	2.39716e-10	-50	AT1G23030	gene,mRNA,protein,exon,CDS;	ARM repeat superfamily protein	OK	hypo	OK
Chr1	22587584	22587584	-	0.000123665	0.00885121	-50	AT1G61250	gene,mRNA,protein,exon,CDS;		OK	hypo	OK
Chr1	29615422	29615422	-	7.62927e-06	0.000863875	-50	AT1G78760	gene,mRNA,protein,CDS,exon;		OK	hypo	OK
Chr1	25485067	25485067	-	0	0	-49.9465	AT1G67970	gene,mRNA,protein,CDS,exon;		OK	hypo	OK
Chr1	12465021	12465021	-	2.69658e-06	0.000356466	-49.9354	AT1G34220	gene,mRNA,protein,CDS,exon;		OK	hypo	OK
Chr1	29893109	29893109	+	2.23381e-07	4.22316e-05	-49.8821	AT1G79460	gene,mRNA,protein;		OK	hypo	OK
Chr1	23987989	23987989	-	8.9553e-06	0.000988313	-49.882	AT1G64583	gene,mRNA,protein,CDS,exon;		OK	hypo	OK
Chr1	6407099	6407099	+	3.33067e-14	3.57473e-11	-49.88	AT1G18610	gene,mRNA,protein;	Galactose oxidase/kelch repeat superfamily protein	OK	hypo	OK
Chr1	10920248	10920248	+	0	0	-49.8286	AT1G30760	gene,mRNA,protein,exon,CDS;		OK	hypo	OK
Chr1	23805091	23805091	-	2.22045e-16	3.58774e-13	-49.8016	AT1G64140	gene,mRNA,protein,CDS,exon;AT1G64142		OK	hypo	OK
Chr1	26233465	26233465	+	3.78139e-10	1.58386e-07	-49.7743	AT1G69740	gene,mRNA,protein,exon,CDS;		OK	hypo	OK
Chr1	30072832	30072832	+	0	0	-49.7652	AT1G79940	gene,mRNA,protein,exon,CDS;		OK	hypo	OK
Chr1	7031023	7031023	+	7.17093e-13	5.85857e-10	-49.742	AT1G20300	gene,mRNA,protein,exon,CDS;	Pentatricopeptide repeat (PPR) superfamily protein	OK	hypo	OK
Chr1	23758880	23758880	+	6.23645e-07	0.000102169	-49.7357	AT1G64040	gene,mRNA,protein,CDS,exon;		OK	hypo	OK
Chr1	4645753	4645753	+	1.98766e-06	0.000274931	-49.7222	AT1G13580	gene,mRNA,protein,CDS,exon;	LAG1 longevity assurance homolog 3	OK	hypo	OK
Chr1	23842673	23842673	+	3.78808e-13	3.27725e-10	-49.6811	AT1G64250	transposable_element_gene,mRNA,exon;Chr1		OK	hypo	OK
Chr1	4041292	4041292	-	2.12602e-07	4.04377e-05	-49.6549	AT1G11960	gene,mRNA,protein,CDS,exon;	ERD (early-responsive to dehydration stress) family protein	OK	hypo	OK
Chr1	12648764	12648764	-	8.02469e-13	6.47457e-10	-49.6539	AT1G34550	gene,mRNA,protein;		OK	hypo	OK
Chr1	9048832	9048832	-	9.40132e-10	3.53542e-07	-49.6164	AT1G26170	gene,mRNA,protein;	ARM repeat superfamily protein	OK	hypo	OK
Chr1	1685399	1685399	-	1.03356e-05	0.00111554	-49.6139	AT1G05630	gene,mRNA,protein,exon,CDS;	Endonuclease/exonuclease/phosphatase family protein	OK	hypo	OK
Chr1	2044100	2044100	-	8.53095e-13	6.8457e-10	-49.6008	AT1G06670	gene,mRNA,protein,exon,CDS;	nuclear DEIH-boxhelicase	OK	hypo	OK
Chr1	9944981	9944981	+	3.80214e-10	1.59147e-07	-49.5614	AT1G28350	gene,mRNA,protein,exon,CDS;	Nucleotidylyl transferase superfamily protein	OK	hypo	OK
Chr1	6767782	6767782	+	0	0	-49.5327	AT1G19550	gene,mRNA,protein,CDS,exon;	Glutathione S-transferase family protein	OK	hypo	OK
Chr1	10834173	10834173	-	1.42246e-10	6.65105e-08	-49.5168	AT1G30580	gene,mRNA,protein;		OK	hypo	OK
Chr1	19134804	19134804	+	3.31535e-08	8.08831e-06	-49.463	AT1G51600	gene,mRNA,protein,exon,CDS;		OK	hypo	OK
Chr1	5467265	5467265	-	5.93451e-06	0.000698674	-49.4505	AT1G15910	gene,mRNA,protein,exon,CDS;	XH/XS domain-containing protein	OK	hypo	OK
Chr1	21569455	21569455	+	6.62724e-06	0.000767261	-49.4307	AT1G58230	gene,mRNA,protein;		OK	hypo	OK
Chr1	11529875	11529875	+	0	0	-49.4169	AT1G32050	gene,mRNA,protein,exon,CDS;		OK	hypo	OK
Chr1	26361103	26361103	-	2.86327e-13	2.54135e-10	-49.4155	AT1G69990	gene,mRNA,protein,CDS,exon;		OK	hypo	OK
Chr1	10446408	10446408	+	5.94865e-09	1.79733e-06	-49.359	AT1G29840	gene,mRNA,protein;	alpha/beta-Hydrolases superfamily protein	OK	hypo	OK
Chr1	29536090	29536090	-	5.7138e-08	1.30015e-05	-49.3579	AT1G78510	gene,mRNA,protein,CDS,exon;		OK	hypo	OK
Chr1	27424809	27424809	-	1.72177e-07	3.37056e-05	-49.2873	AT1G72880	gene,mRNA,protein;		OK	hypo	OK
Chr1	8971138	8971138	-	1.58762e-14	1.80894e-11	-49.2308	AT1G25540	gene,mRNA,protein,CDS,exon;	phytochrome and flowering time regulatory protein (PFT1)	OK	hypo	OK
Chr1	6289523	6289523	-	1.24578e-12	9.65333e-10	-49.1803	AT1G18270	gene,mRNA,protein,CDS,exon;	ketose-bisphosphate aldolase class-II family protein	OK	hypo	OK
Chr1	1649651	1649651	-	9.9563e-11	4.8599e-08	-49.1751	AT1G05570	gene,mRNA,protein,CDS,exon;	callose synthase 1	OK	hypo	OK
Chr1	11106637	11106637	+	2.22045e-16	3.58774e-13	-49.1503	AT1G31120	gene,mRNA,protein,CDS,exon;		OK	hypo	OK
Chr1	2043804	2043804	+	1.33823e-09	4.83108e-07	-49.1411	AT1G06670	gene,mRNA,protein,exon,CDS;	nuclear DEIH-boxhelicase	OK	hypo	OK
Chr1	2739266	2739266	-	1.2978e-06	0.000191019	-49.0683	AT1G08620	gene,mRNA,protein;	Transcription factor jumonji (jmj) family protein / zinc finger (C5HC2 type) family protein	OK	hypo	OK
Chr1	2704739	2704739	+	2.22045e-16	3.58774e-13	-49.0523	AT1G08540	gene,mRNA,protein,exon,CDS;	RNApolymerase sigma subunit 2	OK	hypo	OK
Chr1	20229132	20229132	+	2.9138e-05	0.00266566	-49.0476	AT1G54180	gene,mRNA,protein,exon,CDS;		OK	hypo	OK
Chr1	5801903	5801903	-	4.15159e-05	0.0035791	-49.0347	AT1G16970	gene,mRNA,protein,CDS,exon;	KU70 homolog	OK	hypo	OK
Chr1	7327956	7327956	+	1.02137e-08	2.89301e-06	-49.0313	AT1G20980	gene,mRNA,protein,exon,CDS;	squamosa promoter binding protein-like 14	OK	hypo	OK
Chr1	26421568	26421568	+	6.21795e-06	0.000727528	-49.0233	AT1G70160	gene,mRNA,protein,exon,CDS;		OK	hypo	OK
Chr1	6289481	6289481	-	1.0123e-11	6.30729e-09	-49.0129	AT1G18270	gene,mRNA,protein;	ketose-bisphosphate aldolase class-II family protein	OK	hypo	OK
Chr1	10352409	10352409	-	4.37408e-08	1.02767e-05	-49.0037	AT1G29630	gene,mRNA,protein,exon,CDS;	5'-3' exonuclease family protein	OK	hypo	OK
Chr1	3602946	3602946	-	1.54727e-05	0.00156462	-49.0028	AT1G10820	gene,mRNA,protein;	Protein of unknown function (DUF3755)	OK	hypo	OK
Chr1	9124354	9124354	-	7.14551e-12	4.61781e-09	-48.9833	AT1G26370	gene,mRNA,protein,CDS,exon;	RNA helicase family protein	OK	hypo	OK
Chr1	5121492	5121492	-	1.3034e-13	1.24629e-10	-48.9527	AT1G14850	gene,mRNA,protein,CDS,exon;	nucleoporin 155	OK	hypo	OK
Chr1	29819623	29819623	+	3.48478e-10	1.47263e-07	-48.9462	AT1G79280	gene,mRNA,protein,CDS,exon;		OK	hypo	OK
Chr1	27566075	27566075	-	7.16852e-05	0.00563815	-48.9279	AT1G73320	gene,mRNA,protein,CDS,exon,three_prime_UTR;		OK	hypo	OK
Chr1	5307218	5307218	+	2.00619e-08	5.20551e-06	-48.9115	AT1G15440	gene,mRNA,protein,CDS,exon;	periodic tryptophan protein 2	OK	hypo	OK
Chr1	11263197	11263197	+	1.7089e-11	1.01175e-08	-48.9085	AT1G31460	gene,mRNA,five_prime_UTR,exon;AT1G31470		OK	hypo	OK
Chr1	19661063	19661063	-	6.65464e-11	3.40843e-08	-48.8943	AT1G52780	gene,mRNA,protein,exon,CDS;		OK	hypo	OK
Chr1	12505581	12505581	+	0	0	-48.8875	AT1G34300	gene,mRNA,protein,exon,CDS;		OK	hypo	OK
Chr1	4454248	4454248	-	8.17377e-05	0.00629074	-48.8801	AT1G13060	gene,mRNA,protein;	20S proteasome beta subunit E1	OK	hypo	OK
Chr1	20529959	20529959	+	3.28466e-10	1.39781e-07	-48.8636	AT1G55020	gene,mRNA,protein,exon,CDS;		OK	hypo	OK
Chr1	12449688	12449688	+	1.23711e-08	3.4245e-06	-48.8571	AT1G34180	gene,mRNA,protein,exon,CDS;		OK	hypo	OK
Chr1	29955915	29955915	+	8.27256e-10	3.15993e-07	-48.8535	AT1G79610	gene,mRNA,protein;		OK	hypo	OK
Chr1	5937488	5937488	+	4.7832e-10	1.95192e-07	-48.8178	AT1G17340	gene,mRNA,protein,exon,CDS;	Phosphoinositide phosphatase family protein	OK	hypo	OK
Chr1	1353927	1353927	+	9.10631e-08	1.94783e-05	-48.8095	AT1G04810	gene,mRNA,protein,exon,CDS;	26S proteasome regulatory complex, non-ATPase subcomplex, Rpn2/Psmd1 subunit	OK	hypo	OK
Chr1	2615854	2615854	+	7.5527e-07	0.000120363	-48.7879	AT1G08300	gene,mRNA,protein,exon,CDS;	no vein-like	OK	hypo	OK
Chr1	2217467	2217467	+	1.53344e-12	1.1625e-09	-48.7179	AT1G07220	gene,mRNA,protein;	Arabidopsis thaliana protein of unknown function (DUF821)	OK	hypo	OK
Chr1	7475357	7475357	+	4.77096e-12	3.22763e-09	-48.7072	AT1G21330	transposable_element_gene,mRNA,exon;Chr1	similar to unknown protein [Arabidopsis thaliana] (TAIR:AT2G40680.1)	OK	hypo	OK
Chr1	4728120	4728120	+	0	0	-48.6631	AT1G13790	gene,mRNA,protein,exon,CDS;	XH/XS domain-containing protein	OK	hypo	OK
Chr1	8323643	8323643	+	1.64202e-13	1.53748e-10	-48.596	AT1G23440	gene,mRNA,protein;	Peptidase C15, pyroglutamyl peptidase I-like	OK	hypo	OK
Chr1	7819565	7819565	+	4.49545e-05	0.00382506	-48.5931	AT1G22150	gene,mRNA,protein,exon,CDS;	3	OK	hypo	OK
Chr1	3505197	3505197	-	1.2221e-07	2.50857e-05	-48.5889	AT1G10600	gene,mRNA,exon,three_prime_UTR;	associated molecule with the SH3 domain of STAM 2	OK	hypo	OK
Chr1	4128054	4128054	+	4.4631e-13	3.79554e-10	-48.5714	AT1G12160	gene,mRNA,protein,exon,CDS;	Flavin-binding monooxygenase family protein	OK	hypo	OK
Chr1	19103101	19103101	-	5.07372e-13	4.27356e-10	-48.5695	AT1G51510	gene,mRNA,protein,CDS,exon;		OK	hypo	OK
Chr1	2881541	2881541	-	4.74065e-14	4.93897e-11	-48.5676	AT1G08960	gene,mRNA,protein,exon,CDS;	cation exchanger 11	OK	hypo	OK
Chr1	1485759	1485759	-	5.17397e-12	3.46416e-09	-48.532	AT1G05150	gene,mRNA,protein,CDS,exon;	Calcium-binding tetratricopeptide family protein	OK	hypo	OK
Chr1	29033092	29033092	+	4.20257e-08	9.92039e-06	-48.4848	AT1G77280	gene,mRNA,protein,CDS,exon;		OK	hypo	OK
Chr1	11274988	11274988	-	3.91895e-05	0.00341396	-48.4702	AT1G31500	gene,mRNA,protein,CDS,exon;		OK	hypo	OK
Chr1	3163555	3163555	+	4.08034e-10	1.69564e-07	-48.4475	AT1G09770	gene,mRNA,protein,exon,CDS;	cell division cycle 5	OK	hypo	OK
Chr1	10087611	10087611	+	1.0103e-14	1.19304e-11	-48.4375	AT1G28710	gene,mRNA,protein,CDS,exon;	Nucleotide-diphospho-sugar transferase family protein	OK	hypo	OK
Chr1	2978286	2978286	-	1.22725e-11	7.49505e-09	-48.4321	AT1G09220	gene,mRNA,protein,CDS,exon;	Pentatricopeptide repeat (PPR) superfamily protein	OK	hypo	OK
Chr1	4183525	4183525	+	2.79388e-10	1.21068e-07	-48.4184	AT1G12300	gene,mRNA,three_prime_UTR,exon;	Tetratricopeptide repeat (TPR)-like superfamily protein	OK	hypo	OK
Chr1	30105965	30105965	-	4.39648e-14	4.6142e-11	-48.4128	AT1G80030	gene,mRNA,protein;		OK	hypo	OK
Chr1	1371445	1371445	+	5.10488e-11	2.69144e-08	-48.4082	AT1G04860	gene,mRNA,protein,CDS,exon;	ubiquitin-specific protease 2	OK	hypo	OK
Chr1	19479782	19479782	+	2.66887e-08	6.68484e-06	-48.3871	AT1G52310	gene,mRNA,protein,exon,CDS;		OK	hypo	OK
Chr1	29555821	29555821	-	3.74621e-06	0.000472091	-48.359	AT1G78580	gene,mRNA,protein;		OK	hypo	OK
Chr1	16275513	16275513	+	6.63428e-07	0.000107723	-48.3516	AT1G43190	gene,mRNA,protein,CDS,exon;		OK	hypo	OK
Chr1	9056057	9056057	-	1.11022e-16	1.86814e-13	-48.34	AT1G26180	gene,mRNA,protein,exon,CDS;	unknown protein	OK	hypo	OK
Chr1	4728121	4728121	-	8.90696e-10	3.3718e-07	-48.2486	AT1G13790	gene,mRNA,protein,exon,CDS;	XH/XS domain-containing protein	OK	hypo	OK
Chr1	9288720	9288720	-	4.80089e-08	1.11464e-05	-48.2089	AT1G26810	gene,mRNA,protein,CDS,exon;	galactosyltransferase1	OK	hypo	OK
Chr1	28371805	28371805	-	4.41384e-10	1.81708e-07	-48.1665	AT1G75560	gene,mRNA,protein,CDS,exon;		OK	hypo	OK
Chr1	5234595	5234595	+	0	0	-48.1481	AT1G15210	gene,mRNA,protein,CDS,exon;	pleiotropic drug resistance 7	OK	hypo	OK
Chr1	6205942	6205942	+	1.54649e-05	0.00156391	-48.1481	AT1G18030	gene,mRNA,protein;	Protein phosphatase 2C family protein	OK	hypo	OK
Chr1	11420039	11420039	-	7.75913e-07	0.000123187	-48.1436	AT1G31830	gene,mRNA,protein,CDS,exon;		OK	hypo	OK
Chr1	11541837	11541837	-	3.72768e-10	1.56491e-07	-48.1348	AT1G32090	gene,mRNA,protein,CDS,exon;		OK	hypo	OK
Chr1	9518340	9518340	+	2.7824e-10	1.20613e-07	-48.1081	AT1G27410	gene,mRNA,protein,exon,CDS;	DNA repair metallo-beta-lactamase family protein	OK	hypo	OK
Chr1	1353928	1353928	-	8.90571e-11	4.40287e-08	-48.1033	AT1G04810	gene,mRNA,protein,exon,CDS;	26S proteasome regulatory complex, non-ATPase subcomplex, Rpn2/Psmd1 subunit	OK	hypo	OK
Chr1	27922409	27922409	+	3.64185e-11	1.99281e-08	-48.0952	AT1G74250	gene,mRNA,protein,exon,CDS;		OK	hypo	OK
Chr1	25485120	25485120	-	2.10942e-15	2.86617e-12	-48.0777	AT1G67970	gene,mRNA,protein,CDS,exon;		OK	hypo	OK
Chr1	6733088	6733088	-	8.11044e-08	1.76347e-05	-48	AT1G19450	gene,mRNA,protein,CDS,exon;	Major facilitator superfamily protein	OK	hypo	OK
Chr1	11233525	11233525	-	1.1311e-08	3.16517e-06	-48	AT1G31360	gene,mRNA,protein,exon,CDS;		OK	hypo	OK
Chr1	23758784	23758784	+	4.09126e-08	9.69972e-06	-47.9487	AT1G64040	gene,mRNA,protein,CDS,exon;		OK	hypo	OK
Chr1	12243686	12243686	+	1.47804e-05	0.00150635	-47.8261	AT1G33770	gene,mRNA,protein;		OK	hypo	OK
Chr1	30072903	30072903	+	3.82139e-13	3.30375e-10	-47.8228	AT1G79940	gene,mRNA,protein,exon,CDS;		OK	hypo	OK
Chr1	23633314	23633314	-	7.93411e-07	0.000125559	-47.8143	AT1G63710	gene,mRNA,protein,CDS,exon;		OK	hypo	OK
Chr1	5383341	5383341	+	3.16849e-07	5.70847e-05	-47.7987	AT1G15660	gene,mRNA,protein,exon,CDS;	centromere protein C	OK	hypo	OK
Chr1	29535887	29535887	-	6.2228e-13	5.14511e-10	-47.7419	AT1G78510	gene,mRNA,protein,CDS,exon;		OK	hypo	OK
Chr1	30247826	30247826	-	0	0	-47.7212	AT1G80460	gene,mRNA,protein,CDS,exon;		OK	hypo	OK
Chr1	5670037	5670037	-	2.75611e-07	5.07088e-05	-47.7089	AT1G16560	gene,mRNA,protein;	Per1-like family protein	OK	hypo	OK
Chr1	26497658	26497658	+	1.73251e-11	1.02458e-08	-47.7007	AT1G70320	gene,mRNA,protein,CDS,exon;		OK	hypo	OK
Chr1	2044099	2044099	+	6.40488e-13	5.28643e-10	-47.6856	AT1G06670	gene,mRNA,protein,exon,CDS;	nuclear DEIH-boxhelicase	OK	hypo	OK
Chr1	5254001	5254001	+	2.1727e-07	4.12323e-05	-47.6812	AT1G15280	gene,mRNA,protein,exon,CDS;	CASC3/Barentsz eIF4AIII binding	OK	hypo	OK
Chr1	8526034	8526034	-	1.29863e-10	6.14431e-08	-47.6596	AT1G24100	gene,mRNA,protein,CDS,exon;	UDP-glucosyl transferase 74B1	OK	hypo	OK
Chr1	3587780	3587780	+	7.53352e-07	0.000120103	-47.619	AT1G10760	gene,mRNA,protein,CDS,exon;	Pyruvate phosphate dikinase, PEP/pyruvate binding domain	OK	hypo	OK
Chr1	7001490	7001490	-	0	0	-47.5809	AT1G20200	gene,mRNA,protein,CDS,exon;	PAM domain (PCI/PINT associated module) protein	OK	hypo	OK
Chr1	5950390	5950390	+	3.32042e-09	1.07725e-06	-47.5549	AT1G17360	gene,mRNA,protein,exon,CDS;	BEST Arabidopsis thaliana protein match is: COP1-interacting protein-related (TAIR:AT1G72410.1)	OK	hypo	OK
Chr1	6896142	6896142	-	1.78639e-06	0.000250759	-47.5452	AT1G19870	gene,mRNA,protein,CDS,exon;	IQ-domain 32	OK	hypo	OK
Chr1	11106638	11106638	-	3.75144e-13	3.24936e-10	-47.5423	AT1G31120	gene,mRNA,protein,CDS,exon;		OK	hypo	OK
Chr1	1791021	1791021	-	1.15992e-07	2.39931e-05	-47.5186	AT1G05910	gene,mRNA,protein,exon,CDS;	cell division cycle protein 48-related / CDC48-related	OK	hypo	OK
Chr1	3917592	3917592	+	1.76659e-05	0.0017503	-47.5108	AT1G11650	gene,mRNA,protein;	RNA-binding (RRM/RBD/RNP motifs) family protein	OK	hypo	OK
Chr1	1602717	1602717	-	1.43494e-10	6.70007e-08	-47.5	AT1G05460	gene,mRNA,protein,CDS,exon;	P-loop containing nucleoside triphosphate hydrolases superfamily protein	OK	hypo	OK
Chr1	6973956	6973956	+	0	0	-47.4918	AT1G20110	gene,mRNA,protein,exon,CDS;	RING/FYVE/PHD zinc finger superfamily protein	OK	hypo	OK
Chr1	5512944	5512944	-	0	0	-47.4515	AT1G16070	gene,mRNA,protein,CDS,exon;	tubby like protein 8	OK	hypo	OK
Chr1	8056907	8056907	+	9.35307e-12	5.87607e-09	-47.449	AT1G22760	gene,mRNA,protein,exon,CDS;	poly(A) binding protein 3	OK	hypo	OK
Chr1	28528942	28528942	-	1.31006e-14	1.51842e-11	-47.4164	AT1G76010	gene,mRNA,protein,CDS,exon;		OK	hypo	OK
Chr1	24857703	24857703	+	1.92784e-10	8.70697e-08	-47.4076	AT1G66640	gene,mRNA,protein,exon,CDS;		OK	hypo	OK
Chr1	2978283	2978283	-	1.11184e-11	6.86047e-09	-47.3769	AT1G09220	gene,mRNA,protein,CDS,exon;	Pentatricopeptide repeat (PPR) superfamily protein	OK	hypo	OK
Chr1	390815	390815	-	1.37256e-08	3.74838e-06	-47.3623	AT1G02100	gene,mRNA,protein,exon,CDS;	Leucine carboxyl methyltransferase	OK	hypo	OK
Chr1	28817852	28817852	+	4.38538e-14	4.60385e-11	-47.3554	AT1G76780	gene,mRNA,protein,exon,CDS;		OK	hypo	OK
Chr1	5937428	5937428	-	5.99214e-07	9.87216e-05	-47.3262	AT1G17340	gene,mRNA,protein,exon,CDS;	Phosphoinositide phosphatase family protein	OK	hypo	OK
Chr1	30099631	30099631	+	1.72085e-13	1.60478e-10	-47.3256	AT1G80010	gene,mRNA,protein,exon,CDS;		OK	hypo	OK
Chr1	28298532	28298532	+	9.89455e-05	0.00736098	-47.234	AT1G75400	gene,mRNA,protein,exon,CDS;		OK	hypo	OK
Chr1	30385762	30385762	+	1.67084e-09	5.88256e-07	-47.2099	AT1G80850	gene,mRNA,protein,CDS,exon;		OK	hypo	OK
Chr1	2314905	2314905	-	5.25857e-12	3.5138e-09	-47.1188	AT1G07530	gene,mRNA,protein,CDS,exon;	SCARECROW-like 14	OK	hypo	OK
Chr1	2314425	2314425	-	9.39409e-11	4.61374e-08	-47.1096	AT1G07530	gene,mRNA,protein,CDS,exon;	SCARECROW-like 14	OK	hypo	OK
Chr1	7205181	7205181	-	6.78778e-06	0.000783102	-47.0714	AT1G20750	gene,mRNA,protein,CDS,exon;	RAD3-like DNA-binding helicase protein	OK	hypo	OK
Chr1	18872319	18872319	+	1.12935e-08	3.16099e-06	-47.0588	AT1G50920	gene,mRNA,protein,exon,CDS;		OK	hypo	OK
Chr1	11158750	11158750	+	2.53654e-06	0.000338167	-47.0252	AT1G31230	gene,mRNA,protein,CDS,exon;		OK	hypo	OK
Chr1	27077576	27077576	+	1.20789e-06	0.000179709	-47.0238	AT1G71930	gene,mRNA,protein,exon,CDS;		OK	hypo	OK
Chr1	25116695	25116695	-	7.50572e-09	2.20492e-06	-47.0234	AT1G67140	gene,mRNA,protein,CDS,exon;		OK	hypo	OK
Chr1	2617980	2617980	+	4.19739e-07	7.26716e-05	-47.0143	AT1G08300	gene,mRNA,protein,exon,CDS;	no vein-like	OK	hypo	OK
Chr1	10351629	10351629	-	7.65712e-10	2.95092e-07	-46.982	AT1G29630	gene,mRNA,protein;	5'-3' exonuclease family protein	OK	hypo	OK
Chr1	12505582	12505582	-	1.73732e-08	4.59391e-06	-46.9804	AT1G34300	gene,mRNA,protein,exon,CDS;		OK	hypo	OK
Chr1	5307399	5307399	+	4.80978e-08	1.11663e-05	-46.9024	AT1G15440	gene,mRNA,protein,CDS,exon;	periodic tryptophan protein 2	OK	hypo	OK
Chr1	29058661	29058661	+	6.11737e-09	1.84259e-06	-46.9015	AT1G77320	gene,mRNA,protein,exon,CDS;		OK	hypo	OK
Chr1	7304505	7304505	-	1.5707e-05	0.00158497	-46.875	AT1G20960	gene,mRNA,protein,CDS,exon;	U5 small nuclear ribonucleoprotein helicase, putative	OK	hypo	OK
Chr1	2733074	2733074	+	2.26907e-08	5.79292e-06	-46.8398	AT1G08600	gene,mRNA,protein,exon,CDS;	P-loop containing nucleoside triphosphate hydrolases superfamily protein	OK	hypo	OK
Chr1	20591291	20591291	-	1.1305e-05	0.00120204	-46.8254	AT1G55200	gene,mRNA,protein,CDS,exon;		OK	hypo	OK
Chr1	3794767	3794767	-	3.01878e-08	7.45592e-06	-46.824	AT1G11300	gene,mRNA,protein,exon,CDS;	protein serine/threonine kinases	OK	hypo	OK
Chr1	7965549	7965549	+	1.27998e-09	4.643e-07	-46.7213	AT1G22540	gene,mRNA,protein,exon,CDS;	Major facilitator superfamily protein	OK	hypo	OK
Chr1	2996237	2996237	+	2.36172e-08	6.00293e-06	-46.6341	AT1G09270	gene,mRNA,protein,exon,CDS;	importin alpha isoform 4	OK	hypo	OK
Chr1	11847445	11847445	-	2.22045e-16	3.58774e-13	-46.633	AT1G32750	gene,mRNA,protein,CDS,exon;		OK	hypo	OK
Chr1	9986749	9986749	+	5.28422e-07	8.86297e-05	-46.6309	AT1G28420	gene,mRNA,protein,exon,CDS;	homeobox-1	OK	hypo	OK
Chr1	25511855	25511855	-	9.37053e-05	0.0070474	-46.625	AT1G68060	gene,mRNA,protein,CDS,exon;		OK	hypo	OK
Chr1	10414833	10414833	-	1.50013e-06	0.000216062	-46.6231	AT1G29750	gene,mRNA,protein,CDS,exon;	receptor-like kinase in flowers 1	OK	hypo	OK
Chr1	23758830	23758830	+	3.28134e-08	8.01643e-06	-46.5627	AT1G64040	gene,mRNA,protein,CDS,exon;		OK	hypo	OK
Chr1	22029156	22029156	-	1.7805e-09	6.21656e-07	-46.558	AT1G59840	gene,mRNA,exon,three_prime_UTR;AT1G59850		OK	hypo	OK
Chr1	9056049	9056049	-	1.08191e-12	8.48847e-10	-46.5323	AT1G26180	gene,mRNA,protein;	unknown protein	OK	hypo	OK
Chr1	8866107	8866107	+	3.45509e-05	0.0030735	-46.5149	AT1G25280	gene,mRNA,protein,exon,CDS;	tubby like protein 10	OK	hypo	OK
Chr1	8470553	8470553	-	6.24578e-12	4.09649e-09	-46.496	AT1G23950	gene,mRNA,protein,CDS,exon;	Protein of unknown function (DUF626)	OK	hypo	OK
Chr1	4805863	4805863	+	8.11725e-10	3.10872e-07	-46.4833	AT1G14030	gene,mRNA,protein,CDS,exon;	Rubisco methyltransferase family protein	OK	hypo	OK
Chr1	7586390	7586390	-	2.50922e-05	0.00235221	-46.4607	AT1G21630	gene,mRNA,protein,exon,CDS;	Calcium-binding EF hand family protein	OK	hypo	OK
Chr1	5537670	5537670	+	2.55351e-14	2.80077e-11	-46.4296	AT1G16160	gene,mRNA,protein,exon,CDS;	wall associated kinase-like 5	OK	hypo	OK
Chr1	20452419	20452419	-	1.21554e-06	0.000180658	-46.4286	AT1G54830	gene,mRNA,exon,three_prime_UTR;		OK	hypo	OK
Chr1	26689790	26689790	-	1.1535e-09	4.2311e-07	-46.4231	AT1G70770	gene,mRNA,protein,CDS,exon;		OK	hypo	OK
Chr1	29654370	29654370	+	0	0	-46.4052	AT1G78880	gene,mRNA,protein,CDS,exon;AT1G78882		OK	hypo	OK
Chr1	10920264	10920264	+	0	0	-46.4006	AT1G30760	gene,mRNA,protein,exon,CDS;		OK	hypo	OK
Chr1	28524881	28524881	-	1.39914e-06	0.000203762	-46.3704	AT1G75990	gene,mRNA,protein,CDS,exon;		OK	hypo	OK
Chr1	28007224	28007224	+	1.11022e-16	1.86814e-13	-46.3632	AT1G74510	gene,mRNA,protein,exon,CDS;		OK	hypo	OK
Chr1	26198296	26198296	-	3.61432e-07	6.38803e-05	-46.3534	AT1G69650	gene,mRNA,protein,CDS,exon;		OK	hypo	OK
Chr1	23348332	23348332	+	2.66014e-07	4.91928e-05	-46.3415	AT1G63010	gene,mRNA,protein,CDS,exon;		OK	hypo	OK
Chr1	2370975	2370975	+	8.89456e-08	1.91015e-05	-46.3235	AT1G07670	gene,mRNA,protein,CDS,exon;	endomembrane-type CA-ATPase 4	OK	hypo	OK
Chr1	30076858	30076858	+	6.82454e-13	5.60156e-10	-46.2963	AT1G79950	gene,mRNA,protein;		OK	hypo	OK
Chr1	5173459	5173459	-	2.13215e-10	9.51814e-08	-46.2878	AT1G15020	gene,mRNA,protein,CDS,exon;	quiescin-sulfhydryl oxidase 1	OK	hypo	OK
Chr1	10352412	10352412	+	6.13307e-09	1.84657e-06	-46.25	AT1G29630	gene,mRNA,protein,exon,CDS;	5'-3' exonuclease family protein	OK	hypo	OK
Chr1	25523538	25523538	-	1.25833e-07	2.57024e-05	-46.2121	AT1G68100	gene,mRNA,protein;		OK	hypo	OK
Chr1	8470764	8470764	+	1.67975e-09	5.9083e-07	-46.1289	AT1G23950	gene,mRNA,protein,CDS,exon;	Protein of unknown function (DUF626)	OK	hypo	OK
Chr1	10992642	10992642	+	1.17539e-09	4.30243e-07	-46.1234	AT1G30870	gene,mRNA,protein,exon,CDS;		OK	hypo	OK
Chr1	27942711	27942711	+	6.16736e-05	0.00497677	-46.1133	AT1G74320	gene,mRNA,protein,exon,CDS;		OK	hypo	OK
Chr1	8743261	8743261	-	1.10374e-07	2.30164e-05	-46.0877	AT1G24706	gene,mRNA,protein,exon,CDS;	THO2	OK	hypo	OK
Chr1	22294821	22294821	-	5.86894e-08	1.33025e-05	-46.0688	AT1G60505	gene,ncRNA,exon;AT1G60510		OK	hypo	OK
Chr1	10352408	10352408	+	1.1118e-08	3.11846e-06	-46.0169	AT1G29630	gene,mRNA,protein,exon,CDS;	5'-3' exonuclease family protein	OK	hypo	OK
Chr1	7559649	7559649	-	9.16711e-13	7.30547e-10	-46.0016	AT1G21580	gene,mRNA,protein,CDS,exon;	Zinc finger C-x8-C-x5-C-x3-H type family protein	OK	hypo	OK
Chr1	18060075	18060075	-	1.99043e-08	5.17332e-06	-46	AT1G48830	gene,mRNA,protein,CDS,exon;		OK	hypo	OK
Chr1	4737492	4737492	+	7.62345e-11	3.8382e-08	-45.9819	AT1G13820	gene,mRNA,protein,exon,CDS;	alpha/beta-Hydrolases superfamily protein	OK	hypo	OK
Chr1	9855748	9855748	+	1.27429e-06	0.00018806	-45.9756	AT1G28210	gene,mRNA,protein,exon,CDS;	DNAJ heat shock family protein	OK	hypo	OK
Chr1	6570733	6570733	-	2.17823e-06	0.000297136	-45.9259	AT1G19025	gene,mRNA,protein,exon,CDS;	DNA repair metallo-beta-lactamase family protein	OK	hypo	OK
Chr1	25387767	25387767	+	8.1794e-09	2.37659e-06	-45.903	AT1G67720	gene,mRNA,protein,exon,CDS;		OK	hypo	OK
Chr1	2897399	2897399	+	3.41051e-07	6.08333e-05	-45.9005	AT1G09010	gene,mRNA,protein,CDS,exon;	glycoside hydrolase family 2 protein	OK	hypo	OK
Chr1	27166926	27166926	+	6.84861e-09	2.03664e-06	-45.9001	AT1G72180	gene,mRNA,protein,exon,CDS;		OK	hypo	OK
Chr1	6253108	6253108	-	1.56355e-07	3.10286e-05	-45.8333	AT1G18160	gene,mRNA,protein,exon,CDS;	Protein kinase superfamily protein	OK	hypo	OK
Chr1	8879214	8879214	+	2.84485e-09	9.40027e-07	-45.8003	AT1G25320	gene,mRNA,protein,exon,CDS;	Leucine-rich repeat protein kinase family protein	OK	hypo	OK
Chr1	26347308	26347308	+	8.63521e-09	2.49258e-06	-45.7855	AT1G69950	transposable_element_gene,mRNA,exon;Chr1		OK	hypo	OK
Chr1	4744274	4744274	+	4.56935e-06	0.000559484	-45.7638	AT1G13860	gene,mRNA,protein,CDS,exon;	QUASIMODO2 LIKE 1	OK	hypo	OK
Chr1	1371093	1371093	-	1.1366e-05	0.00120782	-45.7161	AT1G04860	gene,mRNA,protein,CDS,exon;	ubiquitin-specific protease 2	OK	hypo	OK
Chr1	3386986	3386986	+	1.78146e-05	0.00176236	-45.7143	AT1G10320	gene,mRNA,protein;	Zinc finger C-x8-C-x5-C-x3-H type family protein	OK	hypo	OK
Chr1	19838560	19838560	+	3.52557e-07	6.25593e-05	-45.7143	AT1G53190	gene,mRNA,protein,exon,CDS;		OK	hypo	OK
Chr1	7425929	7425929	+	1.41995e-06	0.000206281	-45.6818	AT1G21210	gene,mRNA,protein,exon,CDS;	wall associated kinase 4	OK	hypo	OK
Chr1	12914068	12914068	+	1.41995e-06	0.000206281	-45.6818	AT1G35220	gene,mRNA;		OK	hypo	OK
Chr1	6748411	6748411	-	1.42303e-06	0.000206599	-45.6584	AT1G19485	gene,mRNA,protein,exon,CDS;	Transducin/WD40 repeat-like superfamily protein	OK	hypo	OK
Chr1	8093900	8093900	+	4.99429e-09	1.53826e-06	-45.641	AT1G22870	gene,mRNA,protein,exon,CDS;	Protein kinase family protein with ARM repeat domain	OK	hypo	OK
Chr1	6081419	6081419	+	5.26779e-12	3.51932e-09	-45.6396	AT1G17680	gene,mRNA,protein;	tetratricopeptide repeat (TPR)-containing protein	OK	hypo	OK
Chr1	18711944	18711944	+	3.74501e-06	0.000471955	-45.6349	AT1G50500	gene,mRNA,protein,CDS,exon;		OK	hypo	OK
Chr1	25366480	25366480	-	4.95282e-12	3.32995e-09	-45.6289	AT1G67680	gene,mRNA,protein,CDS,exon;		OK	hypo	OK
Chr1	8896607	8896607	+	1.11022e-16	1.86814e-13	-45.6025	AT1G25360	gene,mRNA,protein,exon,CDS;	Pentatricopeptide repeat (PPR) superfamily protein	OK	hypo	OK
Chr1	7838204	7838204	-	2.00872e-08	5.21105e-06	-45.5833	AT1G22200	gene,mRNA,protein;	Endoplasmic reticulum vesicle transporter protein	OK	hypo	OK
Chr1	3614111	3614111	+	4.55191e-13	3.86042e-10	-45.5614	AT1G10850	gene,mRNA,protein,exon,CDS;	Leucine-rich repeat protein kinase family protein	OK	hypo	OK
Chr1	12490155	12490155	+	8.33322e-11	4.15147e-08	-45.5166	AT1G34260	gene,mRNA,protein,exon,CDS;		OK	hypo	OK
Chr1	23758785	23758785	-	3.31257e-07	5.93139e-05	-45.5128	AT1G64040	gene,mRNA,protein,CDS,exon;		OK	hypo	OK
Chr1	7008106	7008106	+	8.39342e-11	4.17752e-08	-45.4704	AT1G20225	gene,mRNA,protein,CDS,exon;	Thioredoxin superfamily protein	OK	hypo	OK
Chr1	10843162	10843162	+	0.000128041	0.00910188	-45.4545	AT1G30600	gene,mRNA,protein,CDS,exon;		OK	hypo	OK
Chr1	24415531	24415531	+	6.09152e-07	0.000100105	-45.4545	AT1G65650	gene,mRNA,protein,CDS,exon;		OK	hypo	OK
Chr1	18046202	18046202	-	7.43455e-08	1.63496e-05	-45.4451	AT1G48790	gene,mRNA,protein;		OK	hypo	OK
Chr1	6435511	6435511	+	9.91476e-09	2.81837e-06	-45.395	AT1G18690	gene,mRNA,protein,exon,CDS;	Galactosyl transferase GMA12/MNN10 family protein	OK	hypo	OK
Chr1	24477246	24477246	-	3.97793e-13	3.42229e-10	-45.3317	AT1G65810	gene,mRNA,protein,CDS,exon;		OK	hypo	OK
Chr1	5708040	5708040	+	2.49605e-05	0.0023414	-45.2903	AT1G16690	gene,mRNA,protein,exon,CDS;	Enhancer of polycomb-like transcription factor protein	OK	hypo	OK
Chr1	30076859	30076859	-	1.58952e-06	0.000226991	-45.283	AT1G79950	gene,mRNA,protein;		OK	hypo	OK
Chr1	445019	445019	-	9.95976e-07	0.000152392	-45.2525	AT1G02270	gene,mRNA,protein,CDS,exon;	Calcium-binding endonuclease/exonuclease/phosphatase family	OK	hypo	OK
Chr1	10425172	10425172	+	6.17117e-11	3.19085e-08	-45.1724	AT1G29770	gene,mRNA,protein,exon,CDS;	Haloacid dehalogenase-like hydrolase (HAD) superfamily protein	OK	hypo	OK
Chr1	7486412	7486412	+	6.42562e-11	3.30723e-08	-45.1648	AT1G21380	gene,mRNA,protein,CDS,exon;	Target of Myb protein 1	OK	hypo	OK
Chr1	5893439	5893439	-	2.31669e-11	1.3276e-08	-45.1498	AT1G17230	gene,mRNA,protein,exon,CDS;AT1G17232	Leucine-rich receptor-like protein kinase family protein	OK	hypo	OK
Chr1	25835349	25835349	-	3.67597e-11	2.0094e-08	-45.1465	AT1G68790	gene,mRNA,protein,CDS,exon;		OK	hypo	OK
Chr1	1812931	1812931	-	6.94926e-05	0.00549433	-45.122	AT1G05960	gene,mRNA,protein,CDS,exon;	ARM repeat superfamily protein	OK	hypo	OK
Chr1	9998799	9998799	+	1.59187e-10	7.34748e-08	-45.0467	AT1G28440	gene,mRNA,protein,exon,CDS;	HAESA-like 1	OK	hypo	OK
Chr1	1924544	1924544	-	2.26607e-05	0.00215846	-45	AT1G06290	gene,mRNA,protein,exon,CDS;	acyl-CoA oxidase 3	OK	hypo	OK
Chr1	3114026	3114026	+	1.85315e-07	3.59162e-05	-45	AT1G09620	gene,mRNA,protein,CDS,exon;	ATP binding	OK	hypo	OK
Chr1	9040432	9040432	-	3.31733e-08	8.0926e-06	-45	AT1G26150	gene,mRNA,protein,CDS,exon;	proline-rich extensin-like receptor kinase 10	OK	hypo	OK
Chr1	30099632	30099632	-	3.19273e-06	0.000412101	-44.9444	AT1G80010	gene,mRNA,protein,exon,CDS;		OK	hypo	OK
Chr1	19968137	19968137	-	1.11511e-12	8.7304e-10	-44.8561	AT1G53500	gene,mRNA,protein,CDS,exon;		OK	hypo	OK
Chr1	12428464	12428464	+	7.07245e-07	0.000113753	-44.8413	AT1G34120	gene,mRNA,protein,exon,CDS;		OK	hypo	OK
Chr1	26421569	26421569	-	2.60905e-08	6.55273e-06	-44.8307	AT1G70160	gene,mRNA,protein,exon,CDS;		OK	hypo	OK
Chr1	19151623	19151623	-	8.45037e-07	0.000132445	-44.8276	AT1G51640	gene,mRNA,protein,CDS,exon;AT1G51645		OK	hypo	OK
Chr1	10390062	10390062	-	1.22771e-06	0.000182116	-44.8113	AT1G29715	pseudogene,pseudogenic_transcript;	pseudogene, putative receptor-related serine/threonine kinase, blastp match of 67% identity and 2.6e-98 P-value to GP|8671882|gb|AAF78445.1|AC018748_24|AC018748 Contains a weak similarity to disease resistance protein (cf-5) gene from Lycopersicon esculentum gb|AF053993 and contains multiple leucine rich PF|00560 repeats and protein kinase PF|00069 domain. EST gb|T0-TRUNCATED-	OK	hypo	OK
Chr1	29167356	29167356	+	1.72973e-13	1.61185e-10	-44.7761	AT1G77610	gene,mRNA,protein,exon,CDS;		OK	hypo	OK
Chr1	12687373	12687373	-	4.15282e-09	1.31018e-06	-44.7368	AT1G34630	gene,mRNA,protein,exon,CDS,three_prime_UTR;		OK	hypo	OK
Chr1	2740850	2740850	+	5.04818e-13	4.25302e-10	-44.6886	AT1G08620	gene,mRNA,protein,exon,CDS;	Transcription factor jumonji (jmj) family protein / zinc finger (C5HC2 type) family protein	OK	hypo	OK
Chr1	18637364	18637364	-	5.99661e-06	0.000704914	-44.5993	AT1G50310	gene,mRNA,protein,exon,CDS;		OK	hypo	OK
Chr1	25387342	25387342	-	2.18086e-09	7.4464e-07	-44.5988	AT1G67720	gene,mRNA,protein,exon,CDS;		OK	hypo	OK
Chr1	10182337	10182337	+	1.07948e-08	3.03841e-06	-44.5967	AT1G29150	gene,mRNA,protein,exon,CDS;	non-ATPase subunit 9	OK	hypo	OK
Chr1	26923011	26923011	-	1.12605e-05	0.00119816	-44.5946	AT1G71440	gene,mRNA,protein,CDS,exon;		OK	hypo	OK
Chr1	16620927	16620927	+	1.56631e-06	0.000224188	-44.5906	AT1G43850	gene,mRNA,protein,exon,CDS;		OK	hypo	OK
Chr1	5117385	5117385	-	1.11572e-08	3.1285e-06	-44.5733	AT1G14850	gene,mRNA,protein,CDS,exon;	nucleoporin 155	OK	hypo	OK
Chr1	24268976	24268976	-	1.1866e-06	0.000176941	-44.5659	AT1G65340	gene,mRNA,protein,CDS,exon;		OK	hypo	OK
Chr1	29717701	29717701	-	5.7419e-10	2.29039e-07	-44.5177	AT1G79000	gene,mRNA,protein,CDS,exon;		OK	hypo	OK
Chr1	25421180	25421180	-	6.60235e-07	0.000107274	-44.4891	AT1G67800	gene,mRNA,protein;		OK	hypo	OK
Chr1	28371804	28371804	+	6.01098e-10	2.38717e-07	-44.4645	AT1G75560	gene,mRNA,protein,CDS,exon;		OK	hypo	OK
Chr1	10514697	10514697	+	7.62572e-06	0.000863585	-44.4444	AT1G30010	gene,mRNA,protein,exon,CDS;		OK	hypo	OK
Chr1	3795086	3795086	+	0	0	-44.4385	AT1G11300	gene,mRNA,protein,exon,CDS;	protein serine/threonine kinases	OK	hypo	OK
Chr1	10642100	10642100	+	2.042e-10	9.16547e-08	-44.4325	AT1G30240	gene,mRNA,protein,CDS,exon;		OK	hypo	OK
Chr1	29884794	29884794	-	6.02792e-08	1.36198e-05	-44.4272	AT1G79440	gene,mRNA,protein;		OK	hypo	OK
Chr1	10352580	10352580	-	2.71887e-08	6.7949e-06	-44.386	AT1G29630	gene,mRNA,protein,exon,CDS;	5'-3' exonuclease family protein	OK	hypo	OK
Chr1	11696891	11696891	+	5.44634e-10	2.19045e-07	-44.3713	AT1G32415	gene,mRNA,protein,exon,CDS;		OK	hypo	OK
Chr1	20663059	20663059	-	2.69171e-10	1.17204e-07	-44.2898	AT1G55350	gene,mRNA,protein;		OK	hypo	OK
Chr1	7575009	7575009	+	3.23986e-07	5.81964e-05	-44.2697	AT1G21610	gene,mRNA,protein,exon,CDS;	wound-responsive family protein	OK	hypo	OK
Chr1	7819566	7819566	-	1.4112e-12	1.07949e-09	-44.2013	AT1G22150	gene,mRNA,protein;	3	OK	hypo	OK
Chr1	5253863	5253863	-	2.70766e-11	1.5275e-08	-44.2006	AT1G15280	gene,mRNA,protein,exon,CDS;	CASC3/Barentsz eIF4AIII binding	OK	hypo	OK
Chr1	6549596	6549596	+	4.43856e-10	1.82563e-07	-44.1991	AT1G18950	gene,mRNA,protein;	DDT domain superfamily	OK	hypo	OK
Chr1	10796908	10796908	-	4.46946e-09	1.39815e-06	-44.1715	AT1G30490	gene,mRNA,protein;		OK	hypo	OK
Chr1	21926186	21926186	+	2.52876e-06	0.000337324	-44.1667	AT1G59660	gene,mRNA,protein;		OK	hypo	OK
Chr1	2314607	2314607	+	3.45961e-10	1.46367e-07	-44.1659	AT1G07530	gene,mRNA,protein,CDS,exon;	SCARECROW-like 14	OK	hypo	OK
Chr1	6111113	6111113	-	3.15927e-08	7.75716e-06	-44.0975	AT1G17760	gene,mRNA,protein,CDS,exon;	Tetratricopeptide repeat (TPR)-like superfamily protein	OK	hypo	OK
Chr1	1791020	1791020	+	3.12604e-07	5.64266e-05	-44.0513	AT1G05910	gene,mRNA,protein,exon,CDS;	cell division cycle protein 48-related / CDC48-related	OK	hypo	OK
Chr1	8854840	8854840	-	4.98197e-11	2.63614e-08	-44.0286	AT1G25260	gene,mRNA,protein,CDS,exon;	Ribosomal protein L10 family protein	OK	hypo	OK
Chr1	2569668	2569668	+	4.09351e-07	7.11661e-05	-43.9959	AT1G08190	gene,mRNA,protein;	vacuolar protein sorting 41	OK	hypo	OK
Chr1	10182338	10182338	-	2.97382e-07	5.40796e-05	-43.9803	AT1G29150	gene,mRNA,protein,exon,CDS;	non-ATPase subunit 9	OK	hypo	OK
Chr1	999027	999027	+	4.87733e-10	1.98535e-07	-43.9635	AT1G03910	gene,mRNA,protein;	EXPRESSED IN: 25 plant structures	OK	hypo	OK
Chr1	4825280	4825280	-	2.11573e-10	9.45056e-08	-43.9328	AT1G14090	pseudogene,pseudogenic_transcript,pseudogenic_exon;	pseudogene, pentatricopeptide (PPR) repeat-containing protein, contains Pfam profile PF01535: PPR repeat	OK	hypo	OK
Chr1	29988533	29988533	-	1.50701e-10	6.99424e-08	-43.8935	AT1G79690	gene,mRNA,protein;		OK	hypo	OK
Chr1	8100854	8100854	+	0	0	-43.8596	AT1G22882	gene,mRNA,protein,exon,CDS;	Galactose-binding protein	OK	hypo	OK
Chr1	16157000	16157000	+	1.24321e-06	0.000184002	-43.8089	AT1G43020	gene,mRNA,protein,exon,CDS,three_prime_UTR;		OK	hypo	OK
Chr1	29161061	29161061	-	5.32738e-07	8.92605e-05	-43.8048	AT1G77600	gene,mRNA,protein,CDS,exon;		OK	hypo	OK
Chr1	25277748	25277748	+	3.16414e-14	3.41482e-11	-43.7242	AT1G67480	gene,mRNA,protein,exon,CDS;		OK	hypo	OK
Chr1	29950809	29950809	+	1.01269e-09	3.77261e-07	-43.6282	AT1G79600	gene,mRNA,protein,CDS,exon;		OK	hypo	OK
Chr1	8612866	8612866	+	4.34883e-07	7.49461e-05	-43.6066	AT1G24290	gene,mRNA,protein,CDS,exon;	AAA-type ATPase family protein	OK	hypo	OK
Chr1	28206480	28206480	-	0	0	-43.5897	AT1G75150	gene,mRNA,protein,CDS,exon;		OK	hypo	OK
Chr1	6848980	6848980	-	1.52151e-07	3.03278e-05	-43.5805	AT1G19810	pseudogene,pseudogenic_transcript,pseudogenic_exon;	pseudogene, putative cell division control protein, blastp match of 53% identity and 2.2e-113 P-value to GP|6069665|dbj|BAA85441.1||AP000616 EST D15969(C1695) corresponds to a region of the predicted gene.~similar to valosin-containing protein (U20213) {Oryza sativa (japonica cultivar-group)}	OK	hypo	OK
Chr1	5801902	5801902	+	5.42642e-08	1.24232e-05	-43.5751	AT1G16970	gene,mRNA,protein,CDS,exon;	KU70 homolog	OK	hypo	OK
Chr1	3411276	3411276	+	0	0	-43.5376	AT1G10390	gene,mRNA,protein,CDS,exon;	Nucleoporin autopeptidase	OK	hypo	OK
Chr1	7304476	7304476	+	1.20029e-06	0.000178708	-43.5274	AT1G20960	gene,mRNA,protein,CDS,exon;	U5 small nuclear ribonucleoprotein helicase, putative	OK	hypo	OK
Chr1	26632482	26632482	-	1.60298e-09	5.66412e-07	-43.5	AT1G70630	gene,mRNA,protein,exon,CDS;		OK	hypo	OK
Chr1	25372671	25372671	+	1.69012e-05	0.0016858	-43.4566	AT1G67690	gene,mRNA,protein,exon,CDS;		OK	hypo	OK
Chr1	5407084	5407084	+	7.84006e-06	0.000884068	-43.4271	AT1G15720	gene,mRNA,protein,exon,CDS;	TRF-like 5	OK	hypo	OK
Chr1	6067924	6067924	-	2.53692e-06	0.000338204	-43.3721	AT1G17640	gene,mRNA,protein,CDS,exon;	RNA-binding (RRM/RBD/RNP motifs) family protein	OK	hypo	OK
Chr1	28371796	28371796	+	2.78772e-08	6.94444e-06	-43.335	AT1G75560	gene,mRNA,protein,CDS,exon;		OK	hypo	OK
Chr1	27912621	27912621	-	7.23465e-07	0.000115989	-43.3333	AT1G74210	gene,mRNA,protein,exon,CDS;		OK	hypo	OK
Chr1	2418163	2418163	-	6.51163e-08	1.45783e-05	-43.29	AT1G07810	gene,mRNA,protein;	ER-type Ca2+-ATPase 1	OK	hypo	OK
Chr1	16275489	16275489	+	8.8465e-05	0.00671735	-43.2895	AT1G43190	gene,mRNA,protein,CDS,exon;		OK	hypo	OK
Chr1	7220350	7220350	+	5.56333e-13	4.64995e-10	-43.2742	AT1G20780	gene,mRNA,protein,exon,CDS;	senescence-associated E3 ubiquitin ligase 1	OK	hypo	OK
Chr1	10388146	10388146	+	2.038e-08	5.27601e-06	-43.2728	AT1G29710	gene,mRNA,protein,exon,CDS;	Tetratricopeptide repeat (TPR)-like superfamily protein	OK	hypo	OK
Chr1	6372392	6372392	-	9.15965e-08	1.95765e-05	-43.2432	AT1G18500	gene,mRNA,protein;	methylthioalkylmalate synthase-like 4	OK	hypo	OK
Chr1	3193601	3193601	-	2.14508e-11	1.24157e-08	-43.2331	AT1G09830	gene,mRNA,protein,CDS,exon;	Glycinamide ribonucleotide (GAR) synthetase	OK	hypo	OK
Chr1	4825266	4825266	-	1.5771e-10	7.2857e-08	-43.2323	AT1G14090	pseudogene,pseudogenic_transcript,pseudogenic_exon;	pseudogene, pentatricopeptide (PPR) repeat-containing protein, contains Pfam profile PF01535: PPR repeat	OK	hypo	OK
Chr1	10352413	10352413	-	4.93964e-06	0.00059819	-43.2286	AT1G29630	gene,mRNA,protein,exon,CDS;	5'-3' exonuclease family protein	OK	hypo	OK
Chr1	1508305	1508305	+	4.13551e-06	0.000513711	-43.1429	AT1G05200	gene,mRNA,protein,exon,CDS;	glutamate receptor 3.4	OK	hypo	OK
Chr1	24464183	24464183	-	3.59671e-11	1.97103e-08	-43.1287	AT1G65780	gene,mRNA,protein,CDS,exon;		OK	hypo	OK
Chr1	20843108	20843108	-	7.98154e-08	1.73922e-05	-43.1184	AT1G55750	gene,mRNA,protein,CDS,exon;		OK	hypo	OK
Chr1	2514929	2514929	-	3.14444e-07	5.67167e-05	-43.0952	AT1G08070	gene,mRNA,protein,CDS,exon;	Tetratricopeptide repeat (TPR)-like superfamily protein	OK	hypo	OK
Chr1	6611533	6611533	-	1.18882e-06	0.000177229	-43.0952	AT1G19140	gene,mRNA,protein,CDS,exon;	FUNCTIONS IN: molecular_function unknown	OK	hypo	OK
Chr1	20102967	20102967	-	1.18721e-10	5.68035e-08	-43.0949	AT1G53840	gene,mRNA,protein,exon,CDS;		OK	hypo	OK
Chr1	3426129	3426129	-	0.000127289	0.00905941	-42.915	AT1G10417	gene,mRNA,protein,CDS,exon;	Encodes protein with unknown function whose expression is repressed by inoculation with Agrobacterium tumerifaciens.	OK	hypo	OK
Chr1	3220866	3220866	-	9.42638e-06	0.00103205	-42.9093	AT1G09910	gene,mRNA,protein,CDS,exon;	Rhamnogalacturonate lyase family protein	OK	hypo	OK
Chr1	30149621	30149621	+	3.10486e-10	1.32971e-07	-42.8819	AT1G80150	gene,mRNA,protein,exon,CDS;		OK	hypo	OK
Chr1	6309575	6309575	+	3.81746e-07	6.6981e-05	-42.8571	AT1G18335	gene,mRNA,protein;	Acyl-CoA N-acyltransferases (NAT) superfamily protein	OK	hypo	OK
Chr1	17778831	17778831	+	0.000109665	0.00801482	-42.8571	AT1G48120	gene,mRNA,protein,CDS,exon;		OK	hypo	OK
Chr1	9197132	9197132	-	0	0	-42.8365	AT1G26620	gene,mRNA,protein,CDS,exon;	Plant protein of unknown function (DUF863)	OK	hypo	OK
Chr1	10446401	10446401	+	3.57579e-07	6.33295e-05	-42.8302	AT1G29840	gene,mRNA,protein;	alpha/beta-Hydrolases superfamily protein	OK	hypo	OK
Chr1	8093901	8093901	-	6.26414e-06	0.000732052	-42.8277	AT1G22870	gene,mRNA,protein,exon,CDS;	Protein kinase family protein with ARM repeat domain	OK	hypo	OK
Chr1	29968784	29968784	+	1.00238e-06	0.000153202	-42.8205	AT1G79640	gene,mRNA,protein,CDS,exon;		OK	hypo	OK
Chr1	9247927	9247927	+	8.79209e-08	1.89221e-05	-42.8087	AT1G26750	gene,mRNA,protein,exon,CDS;	unknown protein	OK	hypo	OK
Chr1	17454067	17454067	+	2.10101e-11	1.21791e-08	-42.7899	AT1G47530	gene,mRNA,protein,exon,CDS;		OK	hypo	OK
Chr1	394511	394511	-	2.23198e-06	0.000303415	-42.7841	AT1G02110	gene,mRNA,protein;	Protein of unknown function (DUF630 and DUF632)	OK	hypo	OK
Chr1	6973503	6973503	+	7.77156e-16	1.14652e-12	-42.7179	AT1G20110	gene,mRNA,protein,exon,CDS;	RING/FYVE/PHD zinc finger superfamily protein	OK	hypo	OK
Chr1	4982837	4982837	+	2.32889e-05	0.00220778	-42.6705	AT1G14560	gene,mRNA,protein,exon,CDS;	Mitochondrial substrate carrier family protein	OK	hypo	OK
Chr1	19192753	19192753	+	6.774e-11	3.45998e-08	-42.6523	AT1G51745	gene,mRNA,protein,exon,CDS;		OK	hypo	OK
Chr1	29822452	29822452	-	9.78619e-05	0.00730077	-42.6282	AT1G79280	gene,mRNA,protein;		OK	hypo	OK
Chr1	4295398	4295398	-	1.49933e-05	0.00152406	-42.6144	AT1G12620	gene,mRNA,protein,CDS,exon;	Pentatricopeptide repeat (PPR) superfamily protein	OK	hypo	OK
Chr1	18660376	18660376	-	7.69479e-06	0.000870287	-42.5963	AT1G50370	gene,mRNA,protein,exon,CDS;		OK	hypo	OK
Chr1	9542157	9542157	+	4.16897e-06	0.000517242	-42.5831	AT1G27470	gene,mRNA,protein;	transducin family protein / WD-40 repeat family protein	OK	hypo	OK
Chr1	9297406	9297406	+	5.40682e-11	2.83728e-08	-42.5746	AT1G26830	gene,mRNA,protein,exon,CDS;	cullin 3	OK	hypo	OK
Chr1	28270920	28270920	-	1.81753e-06	0.000254579	-42.5647	AT1G75340	gene,mRNA,protein,CDS,exon;		OK	hypo	OK
Chr1	7008107	7008107	-	2.87427e-07	5.25846e-05	-42.5259	AT1G20225	gene,mRNA,protein,CDS,exon;	Thioredoxin superfamily protein	OK	hypo	OK
Chr1	3050136	3050136	-	5.27883e-09	1.61594e-06	-42.4908	AT1G09450	gene,mRNA,protein,exon,CDS;	Protein kinase superfamily protein	OK	hypo	OK
Chr1	11542324	11542324	-	2.23377e-11	1.28706e-08	-42.488	AT1G32090	gene,mRNA,protein;		OK	hypo	OK
Chr1	27919720	27919720	+	4.44089e-16	6.86077e-13	-42.4868	AT1G74240	gene,mRNA,protein;		OK	hypo	OK
Chr1	8613092	8613092	-	2.00534e-08	5.20367e-06	-42.4733	AT1G24290	gene,mRNA,protein,CDS,exon;	AAA-type ATPase family protein	OK	hypo	OK
Chr1	7446487	7446487	+	2.04138e-10	9.16382e-08	-42.472	AT1G21270	gene,mRNA,protein,exon,CDS;	wall-associated kinase 2	OK	hypo	OK
Chr1	5516655	5516655	-	1.73038e-07	3.38471e-05	-42.4615	AT1G16090	gene,mRNA,protein,exon,CDS;	wall associated kinase-like 7	OK	hypo	OK
Chr1	9920904	9920904	+	2.77327e-07	5.09964e-05	-42.4154	AT1G28320	gene,mRNA,protein,CDS,exon;	protease-related	OK	hypo	OK
Chr1	20191151	20191151	+	6.91944e-09	2.05473e-06	-42.399	AT1G54090	gene,mRNA,protein,exon,CDS;		OK	hypo	OK
Chr1	21885387	21885387	-	1.94526e-08	5.07125e-06	-42.381	AT1G59580	gene,mRNA,protein,exon,CDS;		OK	hypo	OK
Chr1	23420091	23420091	+	1.43224e-06	0.000207764	-42.3469	AT1G63150	gene,mRNA,protein,exon,CDS;		OK	hypo	OK
Chr1	3334691	3334691	-	0	0	-42.3077	AT1G10170	gene,mRNA,protein,CDS,exon;	NF-X-like 1	OK	hypo	OK
Chr1	16655717	16655717	-	5.98397e-06	0.00070369	-42.3077	AT1G43900	gene,mRNA,protein,exon,CDS;		OK	hypo	OK
Chr1	5626403	5626403	-	2.34314e-10	1.03574e-07	-42.2973	AT1G16480	gene,mRNA,protein,CDS,exon;	Tetratricopeptide repeat (TPR)-like superfamily protein	OK	hypo	OK
Chr1	17739128	17739128	+	2.47981e-06	0.00033186	-42.2425	AT1G48090	gene,mRNA,protein,CDS,exon;		OK	hypo	OK
Chr1	11432092	11432092	-	8.72182e-08	1.87917e-05	-42.2373	AT1G31850	gene,mRNA,protein,exon,CDS;		OK	hypo	OK
Chr1	20937045	20937045	+	1.82455e-05	0.00179912	-42.234	AT1G55970	gene,mRNA,protein,CDS,exon;		OK	hypo	OK
Chr1	24739092	24739092	+	7.73633e-08	1.69187e-05	-42.216	AT1G66345	gene,mRNA,protein,exon,CDS;		OK	hypo	OK
Chr1	3115687	3115687	-	2.6125e-09	8.72368e-07	-42.2151	AT1G09620	gene,mRNA,protein,CDS,exon;	ATP binding	OK	hypo	OK
Chr1	7578211	7578211	+	3.1412e-05	0.00283755	-42.1769	AT1G21610	gene,mRNA,protein;	wound-responsive family protein	OK	hypo	OK
Chr1	4982845	4982845	+	4.09148e-05	0.00353626	-42.1569	AT1G14560	gene,mRNA,protein,exon,CDS;	Mitochondrial substrate carrier family protein	OK	hypo	OK
Chr1	20988310	20988310	-	7.83995e-08	1.7117e-05	-42.0635	AT1G56120	gene,mRNA,protein,CDS,exon;		OK	hypo	OK
Chr1	29997954	29997954	-	2.63007e-07	4.86902e-05	-42.0635	AT1G79710	gene,mRNA,exon,three_prime_UTR;AT1G79720		OK	hypo	OK
Chr1	7620978	7620978	-	5.98345e-09	1.80681e-06	-42.0414	AT1G21700	gene,mRNA,protein,CDS,exon;	SWITCH/sucrose nonfermenting 3C	OK	hypo	OK
Chr1	4792191	4792191	-	4.60496e-06	0.000563155	-42.019	AT1G13980	gene,mRNA,protein,exon,CDS;	sec7 domain-containing protein	OK	hypo	OK
Chr1	348974	348974	-	5.10353e-07	8.61107e-05	-42.0139	AT1G02010	gene,mRNA,protein,exon,CDS;	secretory 1A	OK	hypo	OK
Chr1	27287793	27287793	-	1.77686e-07	3.46336e-05	-42.0105	AT1G72480	gene,mRNA,protein,CDS,exon;		OK	hypo	OK
Chr1	6436085	6436085	+	8.5757e-12	5.43198e-09	-41.978	AT1G18690	gene,mRNA,protein,exon,CDS;	Galactosyl transferase GMA12/MNN10 family protein	OK	hypo	OK
Chr1	22509138	22509138	-	1.85228e-10	8.40161e-08	-41.9355	AT1G61100	gene,mRNA,protein,CDS,exon;		OK	hypo	OK
Chr1	10807545	10807545	-	9.70867e-10	3.63658e-07	-41.8699	AT1G30510	gene,mRNA,protein,CDS,exon;		OK	hypo	OK
Chr1	23483962	23483962	+	7.57194e-06	0.000858256	-41.8037	AT1G63300	gene,mRNA,protein,exon,CDS;		OK	hypo	OK
Chr1	9929695	9929695	+	1.62543e-07	3.20777e-05	-41.7957	AT1G28323	transposable_element_gene,mRNA,exon;Chr1	copia-like retrotransposon family, has a 1.9e-140 P-value blast match to gb|AAG52949.1| gag/pol polyprotein (Endovir1-1) (Arabidopsis thaliana) (Ty1_Copia-family)	OK	hypo	OK
Chr1	23594854	23594854	-	2.04985e-07	3.91924e-05	-41.7768	AT1G63640	gene,mRNA,protein;		OK	hypo	OK
Chr1	29058467	29058467	+	2.39234e-09	8.07244e-07	-41.7625	AT1G77320	gene,mRNA,protein,exon,CDS;		OK	hypo	OK
Chr1	24287849	24287849	+	2.40455e-08	6.10171e-06	-41.7624	AT1G65380	gene,mRNA,protein,exon,CDS;		OK	hypo	OK
Chr1	11540889	11540889	-	2.35121e-06	0.000317291	-41.7417	AT1G32090	gene,mRNA,protein,CDS,exon;		OK	hypo	OK
Chr1	11146722	11146722	+	2.75597e-08	6.87369e-06	-41.679	AT1G31190	gene,mRNA,protein,exon,CDS;		OK	hypo	OK
Chr1	3917571	3917571	+	5.11103e-06	0.000616181	-41.6667	AT1G11650	gene,mRNA,protein;	RNA-binding (RRM/RBD/RNP motifs) family protein	OK	hypo	OK
Chr1	10441330	10441330	+	1.56275e-05	0.00157825	-41.6149	AT1G29830	gene,mRNA,protein;	Magnesium transporter CorA-like family protein	OK	hypo	OK
Chr1	29150764	29150764	-	2.55682e-06	0.000340441	-41.5992	AT1G77590	gene,mRNA,protein,CDS,exon;		OK	hypo	OK
Chr1	2617981	2617981	-	1.07871e-07	2.25544e-05	-41.5546	AT1G08300	gene,mRNA,protein,exon,CDS;	no vein-like	OK	hypo	OK
Chr1	7485972	7485972	+	7.31702e-09	2.15634e-06	-41.4892	AT1G21380	gene,mRNA,protein,CDS,exon;	Target of Myb protein 1	OK	hypo	OK
Chr1	28790138	28790138	-	3.40663e-09	1.10212e-06	-41.4053	AT1G76710	gene,mRNA,protein,CDS,exon;		OK	hypo	OK
Chr1	16704382	16704382	-	6.98894e-06	0.000802803	-41.3834	AT1G43997	pseudogene,pseudogenic_transcript,pseudogenic_exon;		OK	hypo	OK
Chr1	25192104	25192104	+	3.78586e-14	4.0178e-11	-41.3497	AT1G67290	gene,mRNA,protein,CDS,exon;		OK	hypo	OK
Chr1	27788227	27788227	+	2.77242e-08	6.91006e-06	-41.3333	AT1G73890	gene,mRNA,protein,CDS,exon;		OK	hypo	OK
Chr1	18510022	18510022	+	6.74683e-13	5.54516e-10	-41.3248	AT1G49980	gene,mRNA,protein;		OK	hypo	OK
Chr1	4882921	4882921	-	7.27306e-05	0.00570449	-41.3078	AT1G14300	gene,mRNA,protein,CDS,exon;	ARM repeat superfamily protein	OK	hypo	OK
Chr1	30001763	30001763	+	4.20888e-05	0.00361988	-41.2991	AT1G79730	gene,mRNA,protein;		OK	hypo	OK
Chr1	19999870	19999870	+	6.72839e-08	1.49946e-05	-41.2593	AT1G53590	gene,mRNA,protein,exon,CDS;		OK	hypo	OK
Chr1	4184454	4184454	-	3.85198e-10	1.60996e-07	-41.2327	AT1G12300	gene,mRNA,protein,CDS,exon;	Tetratricopeptide repeat (TPR)-like superfamily protein	OK	hypo	OK
Chr1	4448498	4448498	+	2.43363e-10	1.0714e-07	-41.1962	AT1G13040	gene,mRNA,protein,exon,CDS;	Pentatricopeptide repeat (PPR-like) superfamily protein	OK	hypo	OK
Chr1	7304477	7304477	-	0.00013456	0.00948422	-41.1765	AT1G20960	gene,mRNA,protein,CDS,exon;	U5 small nuclear ribonucleoprotein helicase, putative	OK	hypo	OK
Chr1	3418052	3418052	-	6.13465e-06	0.00071885	-41.1306	AT1G10410	gene,mRNA,protein,CDS,exon;	Protein of unknown function (DUF1336)	OK	hypo	OK
Chr1	22384833	22384833	-	5.89959e-08	1.33642e-05	-41.1285	AT1G60800	gene,mRNA,protein,CDS,exon;		OK	hypo	OK
Chr1	1319054	1319054	+	1.76947e-08	4.66957e-06	-41.0776	AT1G04700	gene,mRNA,protein,exon,CDS;	PB1 domain-containing protein tyrosine kinase	OK	hypo	OK
Chr1	26733527	26733527	-	1.76894e-07	3.45048e-05	-41.0657	AT1G70900	gene,mRNA,protein,exon,CDS;		OK	hypo	OK
Chr1	28081331	28081331	-	3.71615e-07	6.54119e-05	-41.0618	AT1G74740	gene,mRNA,protein,CDS,exon;		OK	hypo	OK
Chr1	25557542	25557542	+	0.000126885	0.00903609	-40.9823	AT1G68185	gene,mRNA,protein,exon,CDS;		OK	hypo	OK
Chr1	8081874	8081874	+	1.68514e-06	0.000238547	-40.9722	AT1G22850	gene,mRNA,protein,CDS,exon;	SNARE associated Golgi protein family	OK	hypo	OK
Chr1	8666752	8666752	+	4.79831e-11	2.54645e-08	-40.9687	AT1G24460	gene,mRNA,protein,exon,CDS;	unknown protein	OK	hypo	OK
Chr1	314053	314053	-	9.14047e-13	7.29209e-10	-40.9664	AT1G01910	gene,mRNA,protein;	P-loop containing nucleoside triphosphate hydrolases superfamily protein	OK	hypo	OK
Chr1	5937427	5937427	+	7.15403e-06	0.000818944	-40.9372	AT1G17340	gene,mRNA,protein,exon,CDS;	Phosphoinositide phosphatase family protein	OK	hypo	OK
Chr1	16444422	16444422	-	5.49153e-09	1.67302e-06	-40.9357	AT1G43650	gene,mRNA,protein,CDS,exon;		OK	hypo	OK
Chr1	27475622	27475622	-	4.04485e-10	1.68411e-07	-40.9314	AT1G73040	gene,mRNA,protein,CDS,exon;		OK	hypo	OK
Chr1	5677365	5677365	-	1.22829e-08	3.40237e-06	-40.905	AT1G16610	gene,mRNA,protein,CDS,exon;	arginine/serine-rich 45	OK	hypo	OK
Chr1	10044817	10044817	-	8.68057e-11	4.3048e-08	-40.9014	AT1G28580	gene,mRNA,protein,CDS,exon;	GDSL-like Lipase/Acylhydrolase superfamily protein	OK	hypo	OK
Chr1	11761503	11761503	-	7.57454e-10	2.92427e-07	-40.8522	AT1G32530	gene,mRNA,protein,CDS,exon;		OK	hypo	OK
Chr1	30278526	30278526	+	1.26697e-08	3.49719e-06	-40.8336	AT1G80530	gene,mRNA,protein,CDS,exon;		OK	hypo	OK
Chr1	21503686	21503686	+	2.14306e-08	5.50873e-06	-40.7842	AT1G58070	gene,mRNA,protein,exon,CDS;		OK	hypo	OK
Chr1	25257516	25257516	-	1.66756e-10	7.66242e-08	-40.7835	AT1G67420	gene,mRNA,protein;		OK	hypo	OK
Chr1	10940655	10940655	-	4.42354e-06	0.000544045	-40.7407	AT1G30810	gene,mRNA,protein,CDS,exon;		OK	hypo	OK
Chr1	24066286	24066286	+	3.63895e-07	6.42482e-05	-40.7407	AT1G64790	gene,mRNA,protein,CDS,exon;		OK	hypo	OK
Chr1	28524880	28524880	+	1.61863e-08	4.32739e-06	-40.6818	AT1G75990	gene,mRNA,protein,CDS,exon;		OK	hypo	OK
Chr1	5254002	5254002	-	2.3469e-10	1.03692e-07	-40.6713	AT1G15280	gene,mRNA,protein,exon,CDS;	CASC3/Barentsz eIF4AIII binding	OK	hypo	OK
Chr1	20654234	20654234	+	3.76221e-09	1.20108e-06	-40.6646	AT1G55350	gene,mRNA,three_prime_UTR,exon;		OK	hypo	OK
Chr1	24140188	24140188	+	3.78176e-06	0.000476003	-40.625	AT1G64990	gene,mRNA,protein,CDS,exon;		OK	hypo	OK
Chr1	30106853	30106853	-	8.99125e-12	5.66705e-09	-40.5856	AT1G80030	gene,mRNA,protein;		OK	hypo	OK
Chr1	3795027	3795027	-	1.48838e-07	2.97557e-05	-40.5303	AT1G11300	gene,mRNA,protein,exon,CDS;	protein serine/threonine kinases	OK	hypo	OK
Chr1	3219741	3219741	+	5.65923e-05	0.00463367	-40.5128	AT1G09900	gene,mRNA,protein,exon,CDS;	Pentatricopeptide repeat (PPR-like) superfamily protein	OK	hypo	OK
Chr1	9124353	9124353	+	2.34778e-05	0.00222278	-40.4698	AT1G26370	gene,mRNA,protein,CDS,exon;	RNA helicase family protein	OK	hypo	OK
Chr1	20769782	20769782	-	3.60737e-10	1.51819e-07	-40.4678	AT1G55590	gene,mRNA,protein,CDS,exon;		OK	hypo	OK
Chr1	30077629	30077629	+	9.00755e-11	4.44668e-08	-40.4274	AT1G79950	gene,mRNA,protein,exon,CDS;		OK	hypo	OK
Chr1	5969088	5969088	-	5.18635e-06	0.000623798	-40.3825	AT1G17410	gene,mRNA,protein,CDS,exon;	Nucleoside diphosphate kinase family protein	OK	hypo	OK
Chr1	6918011	6918011	+	3.23204e-10	1.37668e-07	-40.374	AT1G19930	gene,mRNA,protein,exon,CDS;	Galactose oxidase/kelch repeat superfamily protein	OK	hypo	OK
Chr1	23935456	23935456	+	3.81975e-05	0.00334304	-40.3382	AT1G64430	gene,mRNA,protein,exon,CDS;		OK	hypo	OK
Chr1	5717186	5717186	-	3.94129e-14	4.17198e-11	-40.3361	AT1G16710	gene,mRNA,protein,exon,CDS;	histone acetyltransferase of the CBP family 12	OK	hypo	OK
Chr1	3736296	3736296	+	2.20804e-08	5.65662e-06	-40.2843	AT1G11160	gene,mRNA,protein,exon,CDS;	Transducin/WD40 repeat-like superfamily protein	OK	hypo	OK
Chr1	18236756	18236756	+	4.14446e-12	2.84755e-09	-40.277	AT1G49300	gene,mRNA,protein,exon,CDS;		OK	hypo	OK
Chr1	7819584	7819584	-	1.34984e-08	3.69451e-06	-40.2486	AT1G22150	gene,mRNA,protein;	3	OK	hypo	OK
Chr1	9444282	9444282	+	1.39565e-05	0.00143672	-40.2267	AT1G27180	gene,mRNA,protein,exon,CDS;	disease resistance protein (TIR-NBS-LRR class), putative	OK	hypo	OK
Chr1	5650382	5650382	-	2.35454e-11	1.34699e-08	-40.2145	AT1G16520	gene,mRNA,protein,exon,CDS;	unknown protein	OK	hypo	OK
Chr1	19660047	19660047	+	4.80522e-09	1.48796e-06	-40.1966	AT1G52780	gene,mRNA,protein,exon,CDS;		OK	hypo	OK
Chr1	4149654	4149654	-	6.79856e-06	0.000784027	-40.1914	AT1G12230	gene,mRNA,protein,exon,CDS;	Aldolase superfamily protein	OK	hypo	OK
Chr1	5626387	5626387	-	1.51684e-08	4.09283e-06	-40.1833	AT1G16480	gene,mRNA,protein,CDS,exon;	Tetratricopeptide repeat (TPR)-like superfamily protein	OK	hypo	OK
Chr1	2043805	2043805	-	3.28266e-05	0.00294554	-40.0657	AT1G06670	gene,mRNA,protein,exon,CDS;	nuclear DEIH-boxhelicase	OK	hypo	OK
Chr1	6423073	6423073	-	6.31514e-07	0.000103302	-40.0407	AT1G18660	gene,mRNA,protein,exon,CDS;	zinc finger (C3HC4-type RING finger) family protein	OK	hypo	OK
Chr1	18064571	18064571	+	6.59817e-06	0.000764566	-40.0314	AT1G48840	gene,mRNA,protein;		OK	hypo	OK
Chr1	2072107	2072107	-	6.78199e-05	0.00538383	-40	AT1G06740	transposable_element_gene,mRNA,exon;Chr1	Mutator-like transposase family, has a 2.7e-53 P-value blast match to GB:AAA21566 mudrA of transposon=MuDR (MuDr-element) (Zea mays)	OK	hypo	OK
Chr1	14026729	14026729	-	7.92186e-09	2.31175e-06	-40	AT1G36980	gene,mRNA,exon,three_prime_UTR;		OK	hypo	OK
Chr1	4445016	4445016	-	9.58281e-08	2.03784e-05	-39.9764	AT1G13030	gene,mRNA,protein;	sphere organelles protein-related	OK	hypo	OK
Chr1	25309254	25309254	+	6.89927e-11	3.51668e-08	-39.9429	AT1G67530	gene,mRNA,protein,exon,CDS;		OK	hypo	OK
Chr1	29685851	29685851	-	5.63737e-06	0.000668819	-39.9397	AT1G78950	gene,mRNA,protein,CDS,exon;		OK	hypo	OK
Chr1	24415532	24415532	-	1.14453e-10	5.49818e-08	-39.9327	AT1G65650	gene,mRNA,protein,CDS,exon;		OK	hypo	OK
Chr1	2088541	2088541	-	1.95732e-13	1.80214e-10	-39.9219	AT1G06790	gene,mRNA,protein;	RNA polymerase Rpb7 N-terminal domain-containing protein	OK	hypo	OK
Chr1	3035921	3035921	+	1.96119e-11	1.14408e-08	-39.899	AT1G09410	gene,mRNA,protein,exon,CDS;	pentatricopeptide (PPR) repeat-containing protein	OK	hypo	OK
Chr1	2481223	2481223	+	2.72195e-09	9.04995e-07	-39.8715	AT1G07990	gene,mRNA,protein,exon,CDS;	SIT4 phosphatase-associated family protein	OK	hypo	OK
Chr1	30079726	30079726	-	7.04388e-06	0.000807986	-39.8701	AT1G79960	gene,mRNA,protein,CDS,exon;		OK	hypo	OK
Chr1	10807483	10807483	-	5.26181e-11	2.76708e-08	-39.8551	AT1G30510	gene,mRNA,protein,CDS,exon;		OK	hypo	OK
Chr1	30101673	30101673	-	7.72705e-11	3.88666e-08	-39.8546	AT1G80020	transposable_element_gene,mRNA,exon;Chr1		OK	hypo	OK
Chr1	29020811	29020811	-	1.50363e-05	0.00152755	-39.8138	AT1G77250	gene,mRNA,protein,CDS,exon;		OK	hypo	OK
Chr1	8221444	8221444	-	6.28292e-06	0.000733992	-39.7891	AT1G23190	gene,mRNA,protein,exon,CDS;	Phosphoglucomutase/phosphomannomutase family protein	OK	hypo	OK
Chr1	1397493	1397493	-	0.000132798	0.00938181	-39.7683	AT1G04930	gene,mRNA,protein;	hydroxyproline-rich glycoprotein family protein	OK	hypo	OK
Chr1	24774587	24774587	-	1.34556e-11	8.13695e-09	-39.7622	AT1G66410	gene,mRNA,protein,CDS,exon;		OK	hypo	OK
Chr1	19998157	19998157	-	2.60984e-08	6.5534e-06	-39.7441	AT1G53590	gene,mRNA,protein;		OK	hypo	OK
Chr1	16655688	16655688	-	7.92523e-05	0.00613228	-39.7321	AT1G43900	gene,mRNA,protein,exon,CDS;		OK	hypo	OK
Chr1	3317967	3317967	+	2.37215e-06	0.000319754	-39.7158	AT1G10130	gene,mRNA,protein,exon,CDS;	endoplasmic reticulum-type calcium-transporting ATPase 3	OK	hypo	OK
Chr1	7441002	7441002	+	2.04753e-09	7.04383e-07	-39.6229	AT1G21250	gene,mRNA,protein,exon,CDS;	cell wall-associated kinase	OK	hypo	OK
Chr1	11761202	11761202	-	6.66134e-16	9.96644e-13	-39.5914	AT1G32530	gene,mRNA,protein,CDS,exon;		OK	hypo	OK
Chr1	2398076	2398076	-	1.00282e-09	3.74035e-07	-39.5392	AT1G07730	gene,mRNA,protein,CDS,exon;AT1G07740	Disease resistance-responsive (dirigent-like protein) family protein	OK	hypo	OK
Chr1	19422502	19422502	+	7.22903e-07	0.000115914	-39.4781	AT1G52160	gene,mRNA,protein,CDS,exon;		OK	hypo	OK
Chr1	9296436	9296436	+	4.68877e-07	8.004e-05	-39.4737	AT1G26830	gene,mRNA,protein,exon,CDS;	cullin 3	OK	hypo	OK
Chr1	18715179	18715179	+	1.73928e-05	0.0017277	-39.4665	AT1G50500	gene,mRNA,protein,CDS,exon;		OK	hypo	OK
Chr1	12490130	12490130	+	3.9491e-06	0.00049409	-39.3742	AT1G34260	gene,mRNA,protein,exon,CDS;		OK	hypo	OK
Chr1	23758831	23758831	-	5.33472e-05	0.00441211	-39.3487	AT1G64040	gene,mRNA,protein,CDS,exon;		OK	hypo	OK
Chr1	23804348	23804348	-	4.5302e-09	1.41452e-06	-39.2994	AT1G64140	gene,mRNA,protein,CDS,exon;AT1G64142		OK	hypo	OK
Chr1	20583327	20583327	+	1.81334e-08	4.76902e-06	-39.296	AT1G55175	gene,mRNA,protein,exon,CDS;		OK	hypo	OK
Chr1	3917593	3917593	-	1.29521e-05	0.00134792	-39.2857	AT1G11650	gene,mRNA,protein;	RNA-binding (RRM/RBD/RNP motifs) family protein	OK	hypo	OK
Chr1	26198211	26198211	-	6.08771e-08	1.37381e-05	-39.2857	AT1G69650	gene,mRNA,protein;		OK	hypo	OK
Chr1	24094820	24094820	+	6.73006e-09	2.00541e-06	-39.2704	AT1G64840	gene,mRNA,protein,exon,CDS;		OK	hypo	OK
Chr1	20075808	20075808	+	8.71037e-10	3.30381e-07	-39.2701	AT1G53780	gene,mRNA,protein,CDS,exon;		OK	hypo	OK
Chr1	6066425	6066425	+	4.89877e-07	8.30918e-05	-39.2308	AT1G17630	gene,mRNA,protein,exon,CDS;	Pentatricopeptide repeat (PPR-like) superfamily protein	OK	hypo	OK
Chr1	2043090	2043090	-	8.53252e-07	0.000133464	-39.2241	AT1G06670	gene,mRNA,protein;	nuclear DEIH-boxhelicase	OK	hypo	OK
Chr1	10479686	10479686	+	4.4022e-05	0.00375827	-39.1536	AT1G29940	gene,mRNA,protein,CDS,exon;	nuclear RNA polymerase A2	OK	hypo	OK
Chr1	4454247	4454247	+	5.8695e-08	1.33025e-05	-39.1449	AT1G13060	gene,mRNA,protein;	20S proteasome beta subunit E1	OK	hypo	OK
Chr1	27315036	27315036	-	3.32679e-06	0.000426724	-39.1351	AT1G72540	gene,mRNA,protein,CDS,exon;		OK	hypo	OK
Chr1	24694107	24694107	-	1.8583e-05	0.00182719	-39.0772	AT1G66250	gene,mRNA,protein,exon,CDS;		OK	hypo	OK
Chr1	2503119	2503119	-	1.41176e-09	5.05753e-07	-39.038	AT1G08060	gene,mRNA,protein;	ATP-dependent helicase family protein	OK	hypo	OK
Chr1	3454616	3454616	+	1.92408e-05	0.00188104	-39.0244	AT1G10490	gene,mRNA,protein,exon,CDS;	Domain of unknown function (DUF1726)	OK	hypo	OK
Chr1	6649362	6649362	-	2.34475e-10	1.03622e-07	-38.9973	AT1G19230	gene,mRNA,exon,three_prime_UTR;AT1G19240	Riboflavin synthase-like superfamily protein	OK	hypo	OK
Chr1	10786007	10786007	+	1.229e-07	2.52078e-05	-38.9428	AT1G30470	gene,mRNA,protein,exon,CDS;		OK	hypo	OK
Chr1	11235319	11235319	-	1.12731e-08	3.15583e-06	-38.9406	AT1G31360	gene,mRNA,protein,exon,CDS;		OK	hypo	OK
Chr1	165583	165583	-	3.43103e-08	8.32766e-06	-38.9274	AT1G01448	gene,ncRNA,exon;	other RNA	OK	hypo	OK
Chr1	28007231	28007231	+	2.53734e-11	1.43998e-08	-38.9241	AT1G74510	gene,mRNA,protein,exon,CDS;		OK	hypo	OK
Chr1	28097309	28097309	+	5.552e-05	0.00456132	-38.9099	AT1G74780	gene,mRNA,protein,exon,CDS;		OK	hypo	OK
Chr1	27519381	27519381	+	9.1979e-07	0.000142468	-38.8889	AT1G73180	gene,mRNA,protein,exon,CDS;		OK	hypo	OK
Chr1	5717185	5717185	+	1.59109e-08	4.26331e-06	-38.8706	AT1G16710	gene,mRNA,protein,exon,CDS;	histone acetyltransferase of the CBP family 12	OK	hypo	OK
Chr1	3651128	3651128	-	4.62797e-05	0.00391927	-38.8141	AT1G10930	gene,mRNA,protein,CDS,exon;	DNA helicase (RECQl4A)	OK	hypo	OK
Chr1	9518341	9518341	-	1.37417e-08	3.75158e-06	-38.7496	AT1G27410	gene,mRNA,protein,exon,CDS;	DNA repair metallo-beta-lactamase family protein	OK	hypo	OK
Chr1	22029155	22029155	+	1.99115e-05	0.00193618	-38.7466	AT1G59840	gene,mRNA,exon,three_prime_UTR;AT1G59850		OK	hypo	OK
Chr1	25092306	25092306	+	7.0026e-06	0.000804162	-38.7153	AT1G67120	gene,mRNA,protein,CDS,exon;		OK	hypo	OK
Chr1	10484679	10484679	-	3.72546e-06	0.00046994	-38.7001	AT1G29940	gene,mRNA,protein,CDS,exon;	nuclear RNA polymerase A2	OK	hypo	OK
Chr1	3334690	3334690	+	1.39863e-10	6.55207e-08	-38.6905	AT1G10170	gene,mRNA,protein,CDS,exon;	NF-X-like 1	OK	hypo	OK
Chr1	8891058	8891058	+	2.43979e-08	6.18265e-06	-38.6829	AT1G25350	gene,mRNA,protein,CDS,exon;	glutamine-tRNA ligase, putative / glutaminyl-tRNA synthetase, putative / GlnRS, putative	OK	hypo	OK
Chr1	2314714	2314714	-	1.00446e-10	4.8972e-08	-38.5965	AT1G07530	gene,mRNA,protein,CDS,exon;	SCARECROW-like 14	OK	hypo	OK
Chr1	20922594	20922594	+	2.73893e-06	0.000361384	-38.5337	AT1G55940	gene,mRNA,protein,CDS,exon;		OK	hypo	OK
Chr1	6252375	6252375	+	8.43592e-07	0.000132278	-38.527	AT1G18160	gene,mRNA,protein;	Protein kinase superfamily protein	OK	hypo	OK
Chr1	26821628	26821628	+	1.80899e-11	1.06351e-08	-38.5217	AT1G71120	gene,mRNA,protein,CDS,exon;		OK	hypo	OK
Chr1	20935573	20935573	-	7.05698e-10	2.74798e-07	-38.4848	AT1G55970	gene,mRNA,protein,CDS,exon;		OK	hypo	OK
Chr1	5028547	5028547	+	1.4196e-07	2.85535e-05	-38.4685	AT1G14650	gene,mRNA,protein,exon,CDS;	SWAP (Suppressor-of-White-APricot)/surp domain-containing protein / ubiquitin family protein	OK	hypo	OK
Chr1	26007079	26007079	+	5.57701e-07	9.2779e-05	-38.4505	AT1G69170	gene,mRNA,exon,three_prime_UTR;		OK	hypo	OK
Chr1	4731671	4731671	-	5.60515e-06	0.000665683	-38.4453	AT1G13800	gene,mRNA,protein,CDS,exon;	Tetratricopeptide repeat (TPR)-like superfamily protein	OK	hypo	OK
Chr1	5887574	5887574	+	3.30459e-05	0.00296156	-38.4354	AT1G17220	gene,mRNA,protein,exon,CDS;	Translation initiation factor 2, small GTP-binding protein	OK	hypo	OK
Chr1	4464519	4464519	+	3.35856e-05	0.00300266	-38.4163	AT1G13100	gene,mRNA,protein,exon,CDS;	cytochrome P450, family 71, subfamily B, polypeptide 29	OK	hypo	OK
Chr1	10087612	10087612	-	1.01774e-10	4.95344e-08	-38.3838	AT1G28710	gene,mRNA,protein,CDS,exon;	Nucleotide-diphospho-sugar transferase family protein	OK	hypo	OK
Chr1	7220144	7220144	+	6.66134e-14	6.72775e-11	-38.3721	AT1G20780	gene,mRNA,protein,exon,CDS;	senescence-associated E3 ubiquitin ligase 1	OK	hypo	OK
Chr1	18069985	18069985	-	1.11009e-06	0.000166917	-38.3656	AT1G48860	gene,mRNA,protein,CDS,exon;		OK	hypo	OK
Chr1	881754	881754	-	9.91686e-06	0.00107704	-38.3638	AT1G03530	gene,mRNA,protein,CDS,exon;	nuclear assembly factor 1	OK	hypo	OK
Chr1	7838203	7838203	+	2.9381e-07	5.35551e-05	-38.338	AT1G22200	gene,mRNA,protein;	Endoplasmic reticulum vesicle transporter protein	OK	hypo	OK
Chr1	10857016	10857016	+	9.51082e-05	0.00713637	-38.3333	AT1G30620	gene,mRNA,protein,exon,CDS;		OK	hypo	OK
Chr1	26787776	26787776	-	1.49012e-06	0.000214837	-38.254	AT1G71010	gene,mRNA,protein,exon,CDS;		OK	hypo	OK
Chr1	7304040	7304040	-	7.52591e-09	2.21068e-06	-38.2365	AT1G20960	gene,mRNA,protein,CDS,exon;	U5 small nuclear ribonucleoprotein helicase, putative	OK	hypo	OK
Chr1	1508308	1508308	-	4.88743e-05	0.00410511	-38.1843	AT1G05200	gene,mRNA,protein,exon,CDS;	glutamate receptor 3.4	OK	hypo	OK
Chr1	8467151	8467151	+	1.80902e-05	0.00178595	-38.0952	AT1G23940	gene,mRNA,protein;	ARM repeat superfamily protein	OK	hypo	OK
Chr1	20663058	20663058	+	5.53825e-06	0.000658762	-38.0637	AT1G55350	gene,mRNA,protein;		OK	hypo	OK
Chr1	25211234	25211234	-	1.12014e-05	0.00119336	-38.0616	AT1G67325	gene,mRNA,protein,CDS,exon;		OK	hypo	OK
Chr1	24130612	24130612	+	4.21539e-07	7.29423e-05	-38.0495	AT1G64960	gene,mRNA,protein,exon,CDS;		OK	hypo	OK
Chr1	2897400	2897400	-	4.85173e-09	1.49985e-06	-37.9669	AT1G09010	gene,mRNA,protein,CDS,exon;	glycoside hydrolase family 2 protein	OK	hypo	OK
Chr1	26109092	26109092	-	2.29793e-06	0.000311236	-37.9645	AT1G69450	gene,mRNA,protein,CDS,exon;		OK	hypo	OK
Chr1	16754270	16754270	-	2.73781e-13	2.43996e-10	-37.8988	AT1G44080	gene,mRNA,protein,CDS,exon;		OK	hypo	OK
Chr1	29000423	29000423	-	3.71145e-05	0.00326436	-37.8979	AT1G77180	gene,mRNA,protein,CDS,exon;		OK	hypo	OK
Chr1	9597107	9597107	-	7.75748e-09	2.26861e-06	-37.8788	AT1G27595	gene,mRNA,protein,exon,CDS;	CONTAINS InterPro DOMAIN/s: Symplekin tight junction protein C-terminal (InterPro:IPR022075)	OK	hypo	OK
Chr1	9444283	9444283	-	3.11299e-05	0.00281716	-37.8468	AT1G27180	gene,mRNA,protein,exon,CDS;	disease resistance protein (TIR-NBS-LRR class), putative	OK	hypo	OK
Chr1	12585450	12585450	-	8.55198e-07	0.000133723	-37.8116	AT1G34420	gene,mRNA,protein,exon,CDS;		OK	hypo	OK
Chr1	1788092	1788092	+	2.55622e-06	0.000340385	-37.7778	AT1G05900	gene,mRNA,protein;	endonuclease III 2	OK	hypo	OK
Chr1	24965552	24965552	-	0.000124852	0.00891615	-37.7287	AT1G66920	gene,mRNA,protein,CDS,exon;		OK	hypo	OK
Chr1	5925218	5925218	-	5.80656e-07	9.61221e-05	-37.7204	AT1G17290	gene,mRNA,protein;	alanine aminotransferas	OK	hypo	OK
Chr1	2095554	2095554	-	4.81757e-08	1.11837e-05	-37.6957	AT1G06820	gene,mRNA,protein,CDS,exon;	carotenoid isomerase	OK	hypo	OK
Chr1	7486413	7486413	-	2.55628e-10	1.11953e-07	-37.6899	AT1G21380	gene,mRNA,protein,CDS,exon;	Target of Myb protein 1	OK	hypo	OK
Chr1	30105964	30105964	+	9.71892e-07	0.000149306	-37.688	AT1G80030	gene,mRNA,protein;		OK	hypo	OK
Chr1	12844247	12844247	+	5.72287e-12	3.79049e-09	-37.6609	AT1G35115	transposable_element_gene,mRNA,exon;Chr1		OK	hypo	OK
Chr1	314545	314545	-	4.3414e-09	1.36316e-06	-37.6263	AT1G01910	gene,mRNA,protein,CDS,exon;	P-loop containing nucleoside triphosphate hydrolases superfamily protein	OK	hypo	OK
Chr1	3794766	3794766	+	4.60741e-08	1.07538e-05	-37.5992	AT1G11300	gene,mRNA,protein,exon,CDS;	protein serine/threonine kinases	OK	hypo	OK
Chr1	22466661	22466661	+	1.64879e-07	3.24608e-05	-37.5855	AT1G60995	gene,mRNA,protein;		OK	hypo	OK
Chr1	6435512	6435512	-	1.10203e-08	3.09528e-06	-37.5753	AT1G18690	gene,mRNA,protein,exon,CDS;	Galactosyl transferase GMA12/MNN10 family protein	OK	hypo	OK
Chr1	9288891	9288891	-	8.35912e-09	2.42253e-06	-37.5701	AT1G26810	gene,mRNA,protein,CDS,exon;	galactosyltransferase1	OK	hypo	OK
Chr1	29418057	29418057	+	4.84457e-09	1.49802e-06	-37.5595	AT1G78180	gene,mRNA,protein,exon,CDS;		OK	hypo	OK
Chr1	17054140	17054140	+	2.04125e-05	0.00197695	-37.5	AT1G45110	gene,mRNA,protein,exon,CDS;		OK	hypo	OK
Chr1	20844020	20844020	-	5.42474e-07	9.06578e-05	-37.5	AT1G55750	gene,mRNA,protein,CDS,exon;		OK	hypo	OK
Chr1	18665720	18665720	+	6.11039e-10	2.42015e-07	-37.4439	AT1G50380	gene,mRNA,protein,exon,CDS;		OK	hypo	OK
Chr1	22346929	22346929	-	2.19298e-07	4.15724e-05	-37.3827	AT1G60670	gene,mRNA,protein;		OK	hypo	OK
Chr1	27932475	27932475	+	1.09354e-05	0.00116943	-37.3373	AT1G74290	gene,mRNA,protein,exon,CDS;		OK	hypo	OK
Chr1	24131341	24131341	+	8.26785e-05	0.00634994	-37.3333	AT1G64960	gene,mRNA,protein,exon,CDS;		OK	hypo	OK
Chr1	26787775	26787775	+	5.61511e-09	1.70687e-06	-37.3333	AT1G71010	gene,mRNA,protein,exon,CDS;		OK	hypo	OK
Chr1	5626375	5626375	-	1.02469e-06	0.000156044	-37.3194	AT1G16480	gene,mRNA,protein,CDS,exon;	Tetratricopeptide repeat (TPR)-like superfamily protein	OK	hypo	OK
Chr1	16444424	16444424	-	4.23568e-06	0.000524445	-37.2625	AT1G43650	gene,mRNA,protein,CDS,exon;		OK	hypo	OK
Chr1	324194	324194	-	1.11393e-07	2.31892e-05	-37.2573	AT1G01940	gene,mRNA,protein;	Cyclophilin-like peptidyl-prolyl cis-trans isomerase family protein	OK	hypo	OK
Chr1	8658811	8658811	-	5.97367e-09	1.80436e-06	-37.2093	AT1G24430	gene,mRNA,protein,CDS,exon;	HXXXD-type acyl-transferase family protein	OK	hypo	OK
Chr1	6748410	6748410	+	2.98675e-10	1.28367e-07	-37.1639	AT1G19485	gene,mRNA,protein,exon,CDS;	Transducin/WD40 repeat-like superfamily protein	OK	hypo	OK
Chr1	10086995	10086995	+	2.074e-06	0.000285252	-37.1542	AT1G28710	gene,mRNA,protein,CDS,exon;	Nucleotide-diphospho-sugar transferase family protein	OK	hypo	OK
Chr1	22702688	22702688	-	9.00316e-08	1.92907e-05	-37.0635	AT1G61540	gene,mRNA,protein,exon,CDS;		OK	hypo	OK
Chr1	24527540	24527540	-	7.86038e-13	6.36003e-10	-37.063	AT1G65920	gene,mRNA,protein,CDS,exon;		OK	hypo	OK
Chr1	25454228	25454228	-	2.25686e-08	5.76726e-06	-37.037	AT1G67880	gene,mRNA,protein,CDS,exon;		OK	hypo	OK
Chr1	5050855	5050855	-	1.02054e-06	0.000155527	-37.0062	AT1G14688	gene,mRNA,protein,CDS,exon;	FUNCTIONS IN: molecular_function unknown	OK	hypo	OK
Chr1	2370976	2370976	-	3.14832e-05	0.002843	-36.9853	AT1G07670	gene,mRNA,protein,CDS,exon;	endomembrane-type CA-ATPase 4	OK	hypo	OK
Chr1	10920257	10920257	+	6.66134e-16	9.96644e-13	-36.9352	AT1G30760	gene,mRNA,protein,exon,CDS;		OK	hypo	OK
Chr1	10786008	10786008	-	3.81937e-07	6.70113e-05	-36.9281	AT1G30470	gene,mRNA,protein,exon,CDS;		OK	hypo	OK
Chr1	25378340	25378340	-	3.06077e-11	1.70641e-08	-36.8219	AT1G67710	gene,mRNA,protein,CDS,exon;		OK	hypo	OK
Chr1	4570608	4570608	-	4.09016e-06	0.000508607	-36.8049	AT1G13340	gene,mRNA,protein,CDS,exon;	Regulator of Vps4 activity in the MVB pathway protein	OK	hypo	OK
Chr1	25436595	25436595	+	6.16468e-05	0.00497494	-36.7596	AT1G67840	gene,mRNA,protein,exon,CDS,three_prime_UTR;		OK	hypo	OK
Chr1	5173717	5173717	-	9.37855e-05	0.00705229	-36.7347	AT1G15020	gene,mRNA,protein,CDS,exon;	quiescin-sulfhydryl oxidase 1	OK	hypo	OK
Chr1	29357990	29357990	-	1.06491e-05	0.00114317	-36.7164	AT1G78070	gene,mRNA,protein,exon,CDS;		OK	hypo	OK
Chr1	23533923	23533923	-	7.19916e-05	0.0056584	-36.7021	AT1G63450	gene,mRNA,protein,exon,CDS;		OK	hypo	OK
Chr1	3555457	3555457	+	0.00012581	0.00897176	-36.6667	AT1G10700	gene,mRNA,protein,exon,CDS;	phosphoribosyl pyrophosphate (PRPP) synthase 3	OK	hypo	OK
Chr1	25474540	25474540	-	2.60543e-05	0.00242806	-36.6472	AT1G67930	gene,mRNA,protein,CDS,exon;		OK	hypo	OK
Chr1	2384586	2384586	-	2.51557e-06	0.000335964	-36.6197	AT1G07705	gene,mRNA,protein,exon,CDS;	NOT2 / NOT3 / NOT5 family	OK	hypo	OK
Chr1	2686899	2686899	-	1.63736e-06	0.000232852	-36.604	AT1G08490	gene,mRNA,protein;	chloroplastic NIFS-like cysteine desulfurase	OK	hypo	OK
Chr1	2342897	2342897	+	8.25773e-08	1.79107e-05	-36.5979	AT1G07615	gene,mRNA,protein,CDS,exon;	GTP-binding protein Obg/CgtA	OK	hypo	OK
Chr1	10479687	10479687	-	9.33282e-06	0.00102314	-36.5438	AT1G29940	gene,mRNA,protein,CDS,exon;	nuclear RNA polymerase A2	OK	hypo	OK
Chr1	26386561	26386561	-	7.41038e-07	0.000118447	-36.5385	AT1G70060	gene,mRNA,protein,exon,CDS;		OK	hypo	OK
Chr1	6425518	6425518	-	0.000101402	0.00751288	-36.5079	AT1G18660	gene,mRNA,protein,exon,CDS,three_prime_UTR;	zinc finger (C3HC4-type RING finger) family protein	OK	hypo	OK
Chr1	6732076	6732076	-	4.3114e-05	0.00369388	-36.4634	AT1G19450	gene,mRNA,protein;	Major facilitator superfamily protein	OK	hypo	OK
Chr1	3079122	3079122	+	5.9508e-14	6.0765e-11	-36.4583	AT1G09530	gene,mRNA,protein,exon,CDS;	phytochrome interacting factor 3	OK	hypo	OK
Chr1	11248115	11248115	-	1.4447e-08	3.9205e-06	-36.4492	AT1G31410	gene,mRNA,protein,CDS,exon;		OK	hypo	OK
Chr1	18471636	18471636	-	5.64903e-05	0.00462671	-36.4368	AT1G49890	gene,mRNA,protein,exon,CDS;		OK	hypo	OK
Chr1	5565685	5565685	-	4.22342e-07	7.30569e-05	-36.4003	AT1G16270	gene,mRNA,protein,exon,CDS;	Protein kinase superfamily protein with octicosapeptide/Phox/Bem1p domain	OK	hypo	OK
Chr1	11401565	11401565	+	4.02781e-06	0.000502222	-36.3636	AT1G31810	gene,mRNA,protein;		OK	hypo	OK
Chr1	11266687	11266687	+	4.72125e-07	8.05202e-05	-36.3585	AT1G31480	gene,mRNA,protein;		OK	hypo	OK
Chr1	4764271	4764271	-	5.22655e-06	0.000627837	-36.2968	AT1G13940	gene,mRNA,protein,CDS,exon;	Plant protein of unknown function (DUF863)	OK	hypo	OK
Chr1	10292055	10292055	-	1.44176e-08	3.9131e-06	-36.2965	AT1G29400	gene,mRNA,protein,CDS,exon;	MEI2-like protein 5	OK	hypo	OK
Chr1	4488028	4488028	+	7.66947e-10	2.95537e-07	-36.2951	AT1G13160	gene,mRNA,protein,exon,CDS;	ARM repeat superfamily protein	OK	hypo	OK
Chr1	26234162	26234162	+	0.000108869	0.00796767	-36.2821	AT1G69740	gene,mRNA,protein;		OK	hypo	OK
Chr1	29598002	29598002	-	2.93466e-05	0.00268203	-36.2378	AT1G78690	gene,mRNA,protein;		OK	hypo	OK
Chr1	8470784	8470784	+	1.97034e-07	3.78896e-05	-36.1798	AT1G23950	gene,mRNA,protein,CDS,exon;	Protein of unknown function (DUF626)	OK	hypo	OK
Chr1	11588310	11588310	-	3.07516e-07	5.56679e-05	-36.1781	AT1G32180	gene,mRNA,protein;		OK	hypo	OK
Chr1	23472245	23472245	-	5.17231e-07	8.71042e-05	-36.1742	AT1G63290	gene,mRNA,protein,CDS,exon;		OK	hypo	OK
Chr1	8604842	8604842	+	7.39474e-06	0.000841421	-36.1685	AT1G24267	gene,mRNA,protein,CDS,exon;	Protein of unknown function (DUF1664)	OK	hypo	OK
Chr1	22747970	22747970	-	4.28735e-11	2.30477e-08	-36.1661	AT1G61640	gene,mRNA,protein,CDS,exon;		OK	hypo	OK
Chr1	4613340	4613340	-	0.000101785	0.00753814	-36.1582	AT1G13450	gene,mRNA,protein,CDS,exon,three_prime_UTR;	Homeodomain-like superfamily protein	OK	hypo	OK
Chr1	21259484	21259484	-	3.54425e-06	0.000450509	-36.1481	AT1G56710	gene,mRNA,protein,CDS,exon;		OK	hypo	OK
Chr1	25994411	25994411	-	2.34034e-06	0.000315974	-36.1228	AT1G69150	gene,mRNA,protein,CDS,exon;		OK	hypo	OK
Chr1	20645035	20645035	+	3.63692e-05	0.003209	-36.1111	AT1G55325	gene,mRNA,protein,exon,CDS;		OK	hypo	OK
Chr1	21894550	21894550	+	5.9746e-05	0.0048465	-36.1111	AT1G59610	gene,mRNA,protein,exon,CDS;		OK	hypo	OK
Chr1	9855749	9855749	-	3.01131e-05	0.00274029	-36.092	AT1G28210	gene,mRNA,protein,exon,CDS;	DNAJ heat shock family protein	OK	hypo	OK
Chr1	27219597	27219597	-	3.04041e-06	0.000395171	-36.0833	AT1G72300	gene,mRNA,protein,CDS,exon;		OK	hypo	OK
Chr1	28298533	28298533	-	1.68337e-09	5.91822e-07	-36.0508	AT1G75400	gene,mRNA,protein,exon,CDS;		OK	hypo	OK
Chr1	19646091	19646091	+	5.76313e-06	0.000681535	-36.0434	AT1G52740	gene,mRNA,protein,exon,CDS;		OK	hypo	OK
Chr1	30001764	30001764	-	1.0637e-07	2.22858e-05	-35.9903	AT1G79730	gene,mRNA,protein;		OK	hypo	OK
Chr1	20030157	20030157	-	1.34132e-05	0.00138899	-35.9518	AT1G53650	gene,mRNA,protein,CDS,exon;		OK	hypo	OK
Chr1	5516654	5516654	+	6.28697e-08	1.41275e-05	-35.9479	AT1G16090	gene,mRNA,protein,exon,CDS;	wall associated kinase-like 7	OK	hypo	OK
Chr1	3792513	3792513	+	2.59209e-06	0.000344517	-35.8974	AT1G11290	gene,mRNA,protein,CDS,exon;	Pentatricopeptide repeat (PPR) superfamily protein	OK	hypo	OK
Chr1	8616493	8616493	+	1.71685e-06	0.000242451	-35.8974	AT1G24300	gene,mRNA,protein,CDS,exon;	GYF domain-containing protein	OK	hypo	OK
Chr1	5716224	5716224	-	8.10477e-06	0.000909427	-35.8396	AT1G16710	gene,mRNA,protein,exon,CDS;	histone acetyltransferase of the CBP family 12	OK	hypo	OK
Chr1	6397606	6397606	-	1.28613e-07	2.62053e-05	-35.7888	AT1G18580	gene,mRNA,protein,exon,CDS;	galacturonosyltransferase 11	OK	hypo	OK
Chr1	20770429	20770429	-	3.98788e-05	0.00346258	-35.735	AT1G55590	gene,mRNA,protein,CDS,exon;		OK	hypo	OK
Chr1	8954005	8954005	-	7.59881e-07	0.000121045	-35.6667	AT1G25490	gene,mRNA,protein,exon,CDS;	ARM repeat superfamily protein	OK	hypo	OK
Chr1	25387768	25387768	-	2.40126e-06	0.000323177	-35.5891	AT1G67720	gene,mRNA,protein,exon,CDS;		OK	hypo	OK
Chr1	23000622	23000622	+	2.02972e-06	0.000279943	-35.4678	AT1G62262	gene,mRNA,protein;		OK	hypo	OK
Chr1	5627931	5627931	-	3.10745e-05	0.00281311	-35.4441	AT1G16480	gene,mRNA,protein,CDS,exon;	Tetratricopeptide repeat (TPR)-like superfamily protein	OK	hypo	OK
Chr1	27704895	27704895	-	5.22603e-06	0.000627795	-35.409	AT1G73680	gene,mRNA,protein,CDS,exon;		OK	hypo	OK
Chr1	22194371	22194371	+	6.43244e-08	1.44185e-05	-35.3399	AT1G60170	gene,mRNA,protein,exon,CDS;		OK	hypo	OK
Chr1	2180973	2180973	+	1.23845e-12	9.60863e-10	-35.2273	AT1G07110	gene,mRNA,protein,CDS,exon;	fructose-2,6-bisphosphatase	OK	hypo	OK
Chr1	3820386	3820386	-	2.84451e-06	0.000372999	-35.2102	AT1G11350	gene,mRNA,protein,CDS,exon;	S-domain-1 13	OK	hypo	OK
Chr1	10813013	10813013	+	3.85828e-07	6.76138e-05	-35.2019	AT1G30520	gene,mRNA,protein,exon,CDS;		OK	hypo	OK
Chr1	7564197	7564197	-	4.22952e-05	0.00363493	-35.1974	AT1G21580	gene,mRNA,protein,CDS,exon;	Zinc finger C-x8-C-x5-C-x3-H type family protein	OK	hypo	OK
Chr1	5550102	5550102	-	7.12771e-07	0.000114522	-35.1852	AT1G16220	gene,mRNA,protein,exon,CDS;	Protein phosphatase 2C family protein	OK	hypo	OK
Chr1	2686168	2686168	+	3.99525e-08	9.4995e-06	-35.1564	AT1G08490	gene,mRNA,protein;	chloroplastic NIFS-like cysteine desulfurase	OK	hypo	OK
Chr1	5925592	5925592	+	0.000137186	0.00963581	-35.1507	AT1G17290	gene,mRNA,protein,exon,CDS;	alanine aminotransferas	OK	hypo	OK
Chr1	30099637	30099637	+	1.96609e-08	5.11869e-06	-35.1416	AT1G80010	gene,mRNA,protein,exon,CDS;		OK	hypo	OK
Chr1	16276037	16276037	-	4.54393e-05	0.00385924	-35.1351	AT1G43190	gene,mRNA,protein,CDS,exon;		OK	hypo	OK
Chr1	4041291	4041291	+	2.4165e-08	6.12994e-06	-35.119	AT1G11960	gene,mRNA,protein,CDS,exon;	ERD (early-responsive to dehydration stress) family protein	OK	hypo	OK
Chr1	10113946	10113946	+	4.90356e-07	8.31502e-05	-35.1136	AT1G29000	gene,mRNA,protein,exon,CDS;	Heavy metal transport/detoxification superfamily protein	OK	hypo	OK
Chr1	10460839	10460839	-	1.40936e-06	0.000205033	-35.0649	AT1G29880	gene,mRNA,protein,CDS,exon;	glycyl-tRNA synthetase / glycine--tRNA ligase	OK	hypo	OK
Chr1	8879930	8879930	+	8.2845e-08	1.79597e-05	-35.0406	AT1G25320	gene,mRNA,protein,exon,CDS;	Leucine-rich repeat protein kinase family protein	OK	hypo	OK
Chr1	30325115	30325115	+	8.15033e-09	2.36963e-06	-35.0281	AT1G80680	gene,mRNA,protein,exon,CDS;		OK	hypo	OK
Chr1	5512955	5512955	-	6.66971e-10	2.61674e-07	-34.9607	AT1G16070	gene,mRNA,protein,CDS,exon;	tubby like protein 8	OK	hypo	OK
Chr1	27916291	27916291	+	4.71017e-07	8.03642e-05	-34.9379	AT1G74230	gene,mRNA,protein,exon,CDS;		OK	hypo	OK
Chr1	12595331	12595331	-	3.16622e-08	7.77319e-06	-34.9083	AT1G34460	gene,mRNA,protein;		OK	hypo	OK
Chr1	5893449	5893449	-	3.06949e-08	7.56281e-06	-34.8457	AT1G17230	gene,mRNA,protein,exon,CDS;AT1G17232	Leucine-rich receptor-like protein kinase family protein	OK	hypo	OK
Chr1	29029543	29029543	+	1.39525e-11	8.40585e-09	-34.8093	AT1G77270	gene,mRNA,protein,exon,CDS;		OK	hypo	OK
Chr1	24477719	24477719	-	2.47907e-08	6.26802e-06	-34.75	AT1G65810	gene,mRNA,protein,CDS,exon;		OK	hypo	OK
Chr1	16679430	16679430	+	5.43204e-08	1.24345e-05	-34.7375	AT1G43960	transposable_element_gene,mRNA,exon;Chr1		OK	hypo	OK
Chr1	15946706	15946706	-	5.28355e-12	3.52794e-09	-34.7368	AT1G42490	pseudogene,pseudogenic_transcript,pseudogenic_exon;		OK	hypo	OK
Chr1	7080113	7080113	-	1.6806e-05	0.00167806	-34.6563	AT1G20410	gene,mRNA,protein,CDS,exon;	Pseudouridine synthase family protein	OK	hypo	OK
Chr1	26711292	26711292	-	5.2685e-07	8.84022e-05	-34.6533	AT1G70830	gene,mRNA,protein,CDS,exon,five_prime_UTR;		OK	hypo	OK
Chr1	22053416	22053416	+	4.32083e-09	1.3574e-06	-34.6348	AT1G59900	gene,mRNA,protein;		OK	hypo	OK
Chr1	11696215	11696215	+	7.72715e-13	6.26182e-10	-34.6052	AT1G32415	gene,mRNA,protein,exon,CDS;		OK	hypo	OK
Chr1	7775610	7775610	-	3.82163e-10	1.59909e-07	-34.5596	AT1G22060	gene,mRNA,protein,CDS,exon;	LOCATED IN: vacuole	OK	hypo	OK
Chr1	22054282	22054282	-	3.90615e-07	6.832e-05	-34.5162	AT1G59910	gene,mRNA,protein,CDS,exon;		OK	hypo	OK
Chr1	24881643	24881643	-	0.000134904	0.00950298	-34.4415	AT1G66720	gene,mRNA,protein,exon,CDS;		OK	hypo	OK
Chr1	18595813	18595813	-	1.04912e-08	2.9613e-06	-34.4262	AT1G50200	gene,mRNA,protein,CDS,exon;		OK	hypo	OK
Chr1	359526	359526	-	4.32483e-08	1.01746e-05	-34.3878	AT1G02050	gene,mRNA,protein,CDS,exon;	Chalcone and stilbene synthase family protein	OK	hypo	OK
Chr1	17263943	17263943	+	1.46549e-14	1.6838e-11	-34.3627	AT1G46696	gene,mRNA,protein,CDS,exon;		OK	hypo	OK
Chr1	18044611	18044611	+	1.08325e-05	0.00116031	-34.3537	AT1G48790	gene,mRNA,protein;		OK	hypo	OK
Chr1	6170514	6170514	-	9.08207e-09	2.60631e-06	-34.3137	AT1G17940	gene,mRNA,protein;	Endosomal targeting BRO1-like domain-containing protein	OK	hypo	OK
Chr1	27475632	27475632	-	3.61944e-08	8.72541e-06	-34.3079	AT1G73040	gene,mRNA,protein,CDS,exon;		OK	hypo	OK
Chr1	30262571	30262571	-	8.81439e-05	0.00669696	-34.3053	AT1G80490	gene,mRNA,protein,CDS,exon;		OK	hypo	OK
Chr1	10034632	10034632	-	8.10954e-06	0.000909795	-34.3013	AT1G28530	gene,mRNA,protein,CDS,exon;	unknown protein	OK	hypo	OK
Chr1	18285853	18285853	-	0.000141076	0.0098602	-34.2857	AT1G49410	gene,mRNA;		OK	hypo	OK
Chr1	12595283	12595283	-	4.69687e-10	1.92183e-07	-34.2669	AT1G34460	gene,mRNA,protein;		OK	hypo	OK
Chr1	7422114	7422114	+	1.03467e-06	0.000157271	-34.2461	AT1G21200	gene,mRNA,protein,exon,CDS;	sequence-specific DNA binding transcription factors	OK	hypo	OK
Chr1	26860338	26860338	-	2.49581e-06	0.000333675	-34.1988	AT1G71250	gene,mRNA,protein,exon,CDS;		OK	hypo	OK
Chr1	10945862	10945862	-	6.98456e-06	0.000802325	-34.1688	AT1G30820	gene,mRNA,protein,CDS,exon;		OK	hypo	OK
Chr1	4831782	4831782	+	6.26031e-06	0.000731703	-34.1627	AT1G14110	gene,mRNA,protein,exon,CDS;	fucosyltransferase 9	OK	hypo	OK
Chr1	2454061	2454061	-	1.79643e-05	0.00177531	-34.1022	AT1G07910	gene,mRNA,protein,exon,CDS;	RNAligase	OK	hypo	OK
Chr1	9026739	9026739	+	1.19048e-05	0.00125502	-34.0875	AT1G26110	gene,mRNA,protein,CDS,exon;	decapping 5	OK	hypo	OK
Chr1	30061546	30061546	-	2.23755e-05	0.0021368	-34.0534	AT1G79920	gene,mRNA,protein,CDS,exon;		OK	hypo	OK
Chr1	21492060	21492060	+	2.27008e-06	0.000307881	-34.0426	AT1G58060	gene,mRNA,protein;		OK	hypo	OK
Chr1	2337459	2337459	+	1.12748e-05	0.00119931	-34.0275	AT1G07590	gene,mRNA,protein,CDS,exon;	Tetratricopeptide repeat (TPR)-like superfamily protein	OK	hypo	OK
Chr1	18711945	18711945	-	3.36909e-05	0.00301046	-34	AT1G50500	gene,mRNA,protein,CDS,exon;		OK	hypo	OK
Chr1	10764077	10764077	+	2.01301e-07	3.85898e-05	-33.871	AT1G30450	gene,mRNA,protein,exon,CDS;		OK	hypo	OK
Chr1	28524878	28524878	-	2.68371e-06	0.000354972	-33.8082	AT1G75990	gene,mRNA,protein,CDS,exon;		OK	hypo	OK
Chr1	10200312	10200312	-	5.47104e-05	0.00450471	-33.7347	AT1G29180	gene,mRNA,protein,exon,CDS;	Cysteine/Histidine-rich C1 domain family protein	OK	hypo	OK
Chr1	7411964	7411964	-	7.5424e-07	0.000120219	-33.7012	AT1G21160	gene,mRNA,protein,CDS,exon;	eukaryotic translation initiation factor 2 (eIF-2) family protein	OK	hypo	OK
Chr1	6290965	6290965	-	7.88249e-05	0.00610634	-33.697	AT1G18270	gene,mRNA,protein;	ketose-bisphosphate aldolase class-II family protein	OK	hypo	OK
Chr1	47948	47948	-	1.43958e-06	0.000208649	-33.6806	AT1G01090	gene,mRNA,protein,CDS,exon;	pyruvate dehydrogenase E1 alpha	OK	hypo	OK
Chr1	12669843	12669843	-	2.30228e-06	0.000311689	-33.6735	AT1G34600	transposable_element_gene,mRNA,exon;Chr1		OK	hypo	OK
Chr1	17181258	17181258	-	7.69051e-13	6.2376e-10	-33.6735	AT1G45545	gene,mRNA,protein,CDS,exon;		OK	hypo	OK
Chr1	20989748	20989748	-	6.49427e-06	0.000754442	-33.6733	AT1G56120	gene,mRNA,protein,CDS,exon;		OK	hypo	OK
Chr1	3968448	3968448	-	5.02482e-05	0.0041995	-33.6552	AT1G11750	gene,mRNA,protein,exon,CDS;	CLP protease proteolytic subunit 6	OK	hypo	OK
Chr1	7819576	7819576	-	1.7349e-06	0.000244696	-33.5975	AT1G22150	gene,mRNA,protein;	3	OK	hypo	OK
Chr1	22587583	22587583	+	7.34463e-07	0.000117528	-33.5971	AT1G61250	gene,mRNA,protein,exon,CDS;		OK	hypo	OK
Chr1	5667537	5667537	+	2.68885e-07	4.96369e-05	-33.5897	AT1G16550	pseudogene,pseudogenic_transcript,pseudogenic_exon;	pseudogene, putative cell division cycle protein, blastp match of 53% identity and 2.4e-136 P-value to GP|6069665|dbj|BAA85441.1||AP000616 EST D15969(C1695) corresponds to a region of the predicted gene.~similar to valosin-containing protein (U20213) {Oryza sativa (japonica cultivar-group)}	OK	hypo	OK
Chr1	8628380	8628380	+	2.1778e-05	0.00208842	-33.5714	AT1G24320	gene,mRNA,protein,CDS,exon;	Six-hairpin glycosidases superfamily protein	OK	hypo	OK
Chr1	2337460	2337460	-	4.12499e-08	9.76592e-06	-33.5426	AT1G07590	gene,mRNA,protein,CDS,exon;	Tetratricopeptide repeat (TPR)-like superfamily protein	OK	hypo	OK
Chr1	8047918	8047918	-	6.88883e-05	0.00545366	-33.5423	AT1G22730	gene,mRNA,protein,exon,CDS;	MA3 domain-containing protein	OK	hypo	OK
Chr1	18114741	18114741	+	4.52949e-07	7.76651e-05	-33.5149	AT1G48970	gene,mRNA,protein,CDS,exon;		OK	hypo	OK
Chr1	30321196	30321196	+	4.04601e-05	0.00350418	-33.4609	AT1G80670	gene,mRNA,protein,CDS,exon;		OK	hypo	OK
Chr1	10034055	10034055	-	4.72186e-09	1.46607e-06	-33.4235	AT1G28530	gene,mRNA,protein;	unknown protein	OK	hypo	OK
Chr1	741638	741638	+	7.46362e-08	1.64028e-05	-33.3333	AT1G03090	gene,mRNA,protein;	methylcrotonyl-CoA carboxylase alpha chain, mitochondrial / 3-methylcrotonyl-CoA carboxylase 1 (MCCA)	OK	hypo	OK
Chr1	8505664	8505664	+	1.97674e-08	5.14064e-06	-33.3333	AT1G24040	gene,mRNA,three_prime_UTR,exon;	Acyl-CoA N-acyltransferases (NAT) superfamily protein	OK	hypo	OK
Chr1	10034054	10034054	+	4.2037e-10	1.74045e-07	-33.3333	AT1G28530	gene,mRNA,protein;	unknown protein	OK	hypo	OK
Chr1	7602267	7602267	-	1.81165e-05	0.00178802	-33.221	AT1G21650	gene,mRNA,protein;AT1G21651	Preprotein translocase SecA family protein	OK	hypo	OK
Chr1	10796907	10796907	+	3.5454e-05	0.00314016	-33.1933	AT1G30490	gene,mRNA,protein;		OK	hypo	OK
Chr1	10291376	10291376	-	5.81167e-06	0.000686178	-33.1587	AT1G29400	gene,mRNA,protein,CDS,exon;	MEI2-like protein 5	OK	hypo	OK
Chr1	29862999	29862999	-	9.14505e-05	0.00690478	-33.1044	AT1G79380	gene,mRNA,protein,exon,CDS;		OK	hypo	OK
Chr1	4731670	4731670	+	6.42173e-05	0.005146	-33.068	AT1G13800	gene,mRNA,protein,CDS,exon;	Tetratricopeptide repeat (TPR)-like superfamily protein	OK	hypo	OK
Chr1	20586120	20586120	-	1.06359e-13	1.03546e-10	-33.0275	AT1G55180	gene,mRNA,protein,CDS,exon;		OK	hypo	OK
Chr1	12595280	12595280	-	1.31641e-09	4.76023e-07	-32.9848	AT1G34460	gene,mRNA,protein;		OK	hypo	OK
Chr1	532410	532410	+	8.07225e-05	0.0062266	-32.9573	AT1G02530	gene,mRNA,protein,exon,CDS;	P-glycoprotein 12	OK	hypo	OK
Chr1	21001752	21001752	+	5.92461e-05	0.00481186	-32.9565	AT1G56140	gene,mRNA,protein,CDS,exon;		OK	hypo	OK
Chr1	4754116	4754116	-	4.75281e-05	0.00400856	-32.9052	AT1G13900	gene,mRNA,protein,CDS,exon;	Purple acid phosphatases superfamily protein	OK	hypo	OK
Chr1	25191980	25191980	+	2.84839e-06	0.000373402	-32.8292	AT1G67290	gene,mRNA,protein,CDS,exon;		OK	hypo	OK
Chr1	22468513	22468513	-	2.40574e-07	4.50264e-05	-32.8125	AT1G60995	gene,mRNA,protein;		OK	hypo	OK
Chr1	26911690	26911690	-	3.25438e-05	0.00292457	-32.8005	AT1G71400	gene,mRNA,protein,exon,CDS;		OK	hypo	OK
Chr1	24131342	24131342	-	3.6257e-05	0.00320025	-32.7656	AT1G64960	gene,mRNA,protein,exon,CDS;		OK	hypo	OK
Chr1	24998356	24998356	-	3.44089e-08	8.34776e-06	-32.7586	AT1G66980	gene,mRNA,protein,CDS,exon;		OK	hypo	OK
Chr1	11158340	11158340	+	1.16079e-06	0.000173588	-32.7185	AT1G31220	gene,mRNA,protein,exon,CDS;		OK	hypo	OK
Chr1	27512374	27512374	+	1.00053e-06	0.00015295	-32.6923	AT1G73170	gene,mRNA,protein,CDS,exon;		OK	hypo	OK
Chr1	18665717	18665717	+	1.93199e-06	0.000268315	-32.6892	AT1G50380	gene,mRNA,protein,exon,CDS;		OK	hypo	OK
Chr1	2307764	2307764	+	8.80218e-07	0.000137154	-32.6369	AT1G07510	gene,mRNA,protein,exon,CDS;	FTSH protease 10	OK	hypo	OK
Chr1	2360849	2360849	-	6.37274e-08	1.43011e-05	-32.6087	AT1G07650	gene,mRNA,protein,CDS,exon;	Leucine-rich repeat transmembrane protein kinase	OK	hypo	OK
Chr1	17482122	17482122	+	8.98292e-05	0.00680376	-32.571	AT1G47570	gene,mRNA,protein,exon,CDS;		OK	hypo	OK
Chr1	16655716	16655716	+	1.47885e-07	2.95939e-05	-32.5581	AT1G43900	gene,mRNA,protein,exon,CDS;		OK	hypo	OK
Chr1	20037380	20037380	+	1.60643e-06	0.000229044	-32.5062	AT1G53670	gene,mRNA,protein;		OK	hypo	OK
Chr1	26033895	26033895	+	4.80735e-06	0.000584466	-32.5	AT1G69250	gene,mRNA,protein,exon,CDS;Chr1		OK	hypo	OK
[truncated: 20,788 more rows]

## Sheet: 16,320_CG5%
chr	start	end	strand	pvalue	qvalue	meth.diff	geneinfo	category1	description	10% geneinfo match	hyper/hypo	10% DMbase (start) match
[truncated: 16,320 more rows]
