# Supplementary material for: Herbicide injury induces DNA methylome alterations in Arabidopsis
Source: PeerJ. 2017 Jul 20;5:e3560. doi: 10.7717/peerj.3560 (PMC5522609; doi:10.7717/peerj.3560)
Supplement: Supplemental Information 9 — All differentially methylated regions (DMRs) identified using eDMR algorithm. [file peerj-05-3560-s009.xlsx]

## Sheet: CHH
Chromosome	5% start	5% end	10% start	10% end	5% annotation	10% annotation	5% meanDiff	10% meanDiff	5% direction	10% direction
Chr3	17520457	17520491			Intergenic		40.4239		hyper		gene,mRNA,protein,exon,CDS	CDS
Chr3	18672201	18672232			AT3G50350:CDS;		28.2219		hyper		gene,mRNA,protein	mRNA
Chr5	65164	71140			AT5G01185:transposable_element_gene;AT5TE00230:transposable_element;		-26.45		hypo		gene,mRNA,protein,CDS,exon	CDS
Chr1	16384191	16389379			AT1G43444:transposable_element_gene;AT1G43502:transposable_element_gene;AT1TE53995:transposable_element;		-26.4985		hypo		gene,mRNA,protein,five_prime_UTR,CDS,three_prime_UTR,exon	three_prime_UTR,five_prime_UTR
Chr1	15445743	15454071			AT1G40630:transposable_element_gene;AT1TE51000:transposable_element;AT1TE51005:transposable_element;AT1TE51010:transposable_element;AT1TE51015:transposable_element;AT1TE51020:transposable_element;		-26.662		hypo		gene,mRNA,three_prime_UTR,exon	three_prime_UTR
Chr5	13650991	13651661			AT5TE48550:transposable_element;AT5TE48555:transposable_element;		-26.8603		hypo		pseudogene,pseudogenic_transcript,pseudogenic_exon	pseudogene
Chr2	7230813	7237585			AT2G16676:three_prime_UTR,five_prime_UTR;AT2G16680:transposable_element_gene;AT2G16690:transposable_element_gene;AT2TE29460:transposable_element;AT2TE29465:transposable_element;		-26.8852		hypo		transposable_element_gene,mRNA,exon	transposable_element_gene
Chr4	5060221	5068599			AT4G08112:transposable_element_gene;AT4G08113:transposable_element_gene;AT4G08114:transposable_element_gene;AT4TE21075:transposable_element;AT4TE21080:transposable_element;AT4TE21085:transposable_element;AT4TE21090:transposable_element;		-27.0726		hypo		transposable_element,transposon_fragment	transposable_element
Chr3	12499367	12501554			AT3G30811:transposable_element_gene;AT3TE51535:transposable_element;		-27.1381		hypo
Chr1	14218876	14222777			AT1G37340:transposable_element_gene;AT1TE46665:transposable_element;AT1TE46670:transposable_element;		-27.4888		hypo
Chr4	5075095	5081026			AT4G08100:transposable_element_gene;AT4G08115:transposable_element_gene;AT4TE21095:transposable_element;AT4TE21100:transposable_element;AT4TE21110:transposable_element;		-27.4989		hypo
Chr1	11305724	11308636			AT1G31570:transposable_element_gene;AT1TE36570:transposable_element;		-27.7691		hypo
Chr5	14833479	14833753			AT5G37390:transposable_element_gene;AT5TE53465:transposable_element;		-28.3254		hypo
Chr5	12505921	12512306			AT5G33252:transposable_element_gene;AT5TE44310:transposable_element;AT5TE44315:transposable_element;AT5TE44320:transposable_element;AT5TE44325:transposable_element;AT5TE44330:transposable_element;		-28.3337		hypo
Chr5	7027806	7030519			AT5G20750:transposable_element_gene;AT5TE25460:transposable_element;		-28.7662		hypo
Chr5	8928365	8930809			AT5G25615:transposable_element_gene;AT5TE32355:transposable_element;		-28.8395		hypo
Chr5	9183230	9187992			AT5G26236:transposable_element_gene;AT5TE33235:transposable_element;		-28.9418		hypo
Chr2	6264812	6269041			AT2G14650:transposable_element_gene;AT2TE25540:transposable_element;		-29.0366		hypo
Chr5	3906753	3909743			AT5G12085:transposable_element_gene;AT5G12090:CDS;AT5TE14165:transposable_element;		-29.8466		hypo
Chr4	2281191	2287819			AT4G04550:transposable_element_gene;AT4G04560:transposable_element_gene;AT4TE10590:transposable_element;AT4TE10595:transposable_element;AT4TE10600:transposable_element;		-30.0452		hypo
Chr2	4007824	4011234			AT2G10420:transposable_element_gene;AT2G10430:pseudogene;AT2TE16955:transposable_element;AT2TE16960:transposable_element;		-30.1747		hypo
Chr5	26258524	26259966	26259910	26260012	AT5G65676:transposable_element_gene;AT5TE94555:transposable_element;	AT5G65676:transposable_element_gene;AT5TE94555:transposable_element;	-35.2568	-41.3453	hypo	hypo
Chr5	8893313	8893372	8893300	8893357	Intergenic	Intergenic	-36.6425	-68.3214	hypo	hypo
Chr2	13717342	13717418	13717337	13717594	AT2G32291:pseudogene;	AT2G32291:pseudogene;	-56.4589	-60.1366	hypo	hypo
Chr1			12435639	12435644		Intergenic		53.4343		hyper
Chr1			25343335	25343356		AT1TE83175:transposable_element;		52.5589		hyper
Chr5			17107687	17107744		AT5TE61795:transposable_element;		51.3615		hyper
Chr1			29263888	29263932		AT1G77820:transposable_element_gene;AT1TE95740:transposable_element;		38.2194		hyper
Chr2			8568447	8568555		Intergenic		36.7075		hyper
Chr5			13615662	13615674		Intergenic		32.4299		hyper
Chr1			18931281	18931298		Intergenic		30.4565		hyper
Chr3			557814	557977		Intergenic		-25.1397		hypo
Chr2			1917456	1917468		Intergenic		-25.8343		hypo
Chr4			6536667	6536735		AT4TE27915:transposable_element;		-25.8414		hypo
Chr4			10112346	10112364		Intergenic		-26.6816		hypo
Chr2			15791337	15791345		Intergenic		-27.0606		hypo
Chr5			22165193	22165227		Intergenic		-28.0123		hypo
Chr1			9812101	9812120		Intergenic		-28.085		hypo
Chr4			379108	379127		Intergenic		-28.1416		hypo
Chr4			1063727	1063890		Intergenic		-28.2639		hypo
Chr1			17961577	17961610		Intergenic		-28.3652		hypo
Chr2			9382357	9382372		AT2TE39830:transposable_element;		-29.92		hypo
Chr2			6029734	6029806		AT2G14240:transposable_element_gene;AT2TE24525:transposable_element;		-31.5489		hypo
Chr3			9393986	9394175		AT3G25727:CDS;		-33.9247		hypo
Chr1			8515409	8515435		AT1TE27475:transposable_element;		-37.7161		hypo
Chr1			24506657	24506682		Intergenic		-37.7646		hypo
Chr1			8837244	8837313		AT1G25220:three_prime_UTR;		-37.8046		hypo
Chr4			5314560	5314754		Intergenic		-38.0257		hypo
Chr4			5987891	5988428		AT4G09455:transposable_element_gene;AT4TE25200:transposable_element;		-38.6536		hypo
Chr4			5988811	5988846		AT4G09455:transposable_element_gene;AT4TE25200:transposable_element;		-38.7127		hypo
Chr2			8092162	8092171		Intergenic		-40.505		hypo
Chr3			5986736	5986992		AT3G17500:CDS;		-41.8097		hypo
Chr1			22357039	22357251		AT1G60720:CDS;		-42.9829		hypo
Chr1			9630647	9630683		AT1G27671:pseudogene;		-45.9774		hypo
Chr3			11097313	11097354		AT3TE46170:transposable_element;		-46.9416		hypo
Chr1			6959994	6960084		Intergenic		-47.2772		hypo
Chr1			26395140	26395164		AT1G70080:CDS;		-48.1746		hypo
Chr3			17176720	17176796		Intergenic		-48.4863		hypo
Chr3			8654409	8654441		Intergenic		-48.921		hypo
Chr5			8657093	8657116		Intergenic		-50.4549		hypo
Chr1			10703011	10703052		AT1TE34590:transposable_element;		-56.2737		hypo
Chr1			29460838	29460865		Intergenic		-59.761		hypo
Chr5			21028098	21028165		AT5G51760:mRNA;		-64.9949		hypo

## Sheet: CHG
Chromosome	5% start	5% end	10% start	10% end	5% annotation	10% annotation	5% meanDiff	10% meanDiff	5% direction	10% direction
Chr3	17579992	17580113			AT3TE71215:transposable_element;		50.7865		hyper		transposable_element,transposon_fragment	transposable_element
Chr4	6977643	6977658			Intergenic		30.6798		hyper		gene,mRNA,protein,CDS,exon	CDS
Chr1	2158042	2158085			AT1G07025:CDS;		29.4414		hyper		gene,mRNA,protein,exon,CDS	CDS
Chr5	12662392	12662489	12662319	12662711	AT5G33390:CDS;	AT5G33390:CDS;	-40.9864	-53.4117	hypo	hypo	pseudogene,pseudogenic_transcript,pseudogenic_exon	pseudogene
Chr2	13717344	13717588	13717337	13717755	AT2G32291:pseudogene;	AT2G32291:pseudogene;AT2TE60380:transposable_element;	-61.8224	-69.1728	hypo	hypo	transposable_element_gene,mRNA,exon	transposable_element_gene
Chr3	21509526	21509746	21509526	21509746	Intergenic	Intergenic	43.273	34.5014	hyper	hyper	gene,mRNA,exon,five_prime_UTR	five_prime_UTR
Chr3			22070669	22071016		AT3G59750:CDS;		50.5878		hyper	gene,mRNA,protein,CDS,exon,three_prime_UTR	three_prime_UTR
Chr1			29263761	29263913		AT1G77820:transposable_element_gene;AT1TE95740:transposable_element;		40.9336		hyper
Chr5			21091537	21091862		AT5G51890:CDS;		38.0168		hyper
Chr3			9232673	9232690		Intergenic		32.8823		hyper
Chr1			17384434	17384459		AT1TE57570:transposable_element;		32.1545		hyper
Chr1			23173376	23173558		AT1G62580:CDS;		-25.6896		hypo
Chr3			10806331	10806779		AT3G28780:CDS;		-26.1321		hypo
Chr4			1938439	1938888		AT4TE09360:transposable_element;		-27.097		hypo
Chr5			22165165	22165310		Intergenic		-27.3611		hypo
Chr3			11975772	11975867		AT3G30380:CDS;		-27.4045		hypo
Chr1			13014225	13014231		AT1G35390:transposable_element_gene;		-27.8555		hypo
Chr2			4492567	4493462		AT2G11300:transposable_element_gene;AT2TE18830:transposable_element;		-27.9157		hypo
Chr2			4488735	4490802		AT2G11290:transposable_element_gene;AT2TE18825:transposable_element;AT2TE18830:transposable_element;		-28.3882		hypo
Chr5			12968113	12970432		AT5G34790:transposable_element_gene;AT5G34795:pseudogene;AT5TE46155:transposable_element;AT5TE46160:transposable_element;AT5TE46165:transposable_element;		-28.5126		hypo
Chr2			3036635	3038298		AT2G07320:transposable_element_gene;		-28.5922		hypo
Chr5			14083468	14084001		AT5G35935:transposable_element_gene;AT5TE50260:transposable_element;		-28.8691		hypo
Chr5			7462475	7462518		Intergenic		-28.9938		hypo
Chr3			11854814	11856893		AT3G30213:transposable_element_gene;AT3TE49340:transposable_element;AT3TE49345:transposable_element;AT3TE49350:transposable_element;AT3TE49355:transposable_element;		-29.2487		hypo
Chr5			19965124	19965650		AT5G49250:CDS;		-29.253		hypo
Chr1			17713867	17714142		AT1TE58825:transposable_element;		-29.3237		hypo
Chr3			22767294	22767940		AT3TE92795:transposable_element;AT3TE92800:transposable_element;AT3TE92805:transposable_element;		-29.4532		hypo
Chr3			7041320	7041360		AT3TE29575:transposable_element;		-30.8244		hypo
Chr2			6027575	6027811		AT2G14230:transposable_element_gene;AT2TE24525:transposable_element;		-31.1388		hypo
Chr3			7764929	7765043		AT3G22050:CDS;		-31.2505		hypo
Chr1			10545179	10545359		AT1G30060:CDS;		-31.4085		hypo
Chr5			10942460	10942645		AT5G28920:CDS;		-31.9035		hypo
Chr2			1402373	1403317		AT2G04160:CDS;		-32.0382		hypo
Chr3			11053991	11054068		AT3TE45965:transposable_element;		-32.3087		hypo
Chr2			8560641	8560819		AT2TE35835:transposable_element;		-32.367		hypo
Chr3			3542800	3543050		AT3G11310:CDS;		-32.4037		hypo
Chr3			14921180	14923296		AT3G42820:transposable_element_gene;AT3TE60875:transposable_element;		-32.5595		hypo
Chr3			15916081	15916415		AT3G44210:CDS;		-32.6428		hypo
Chr3			10640877	10641758		AT3G28410:CDS;		-33.0608		hypo
Chr4			5084255	5084430		AT4G08110:transposable_element_gene;AT4TE21115:transposable_element;		-33.929		hypo
Chr3			16377695	16377715		AT3TE66335:transposable_element;		-33.984		hypo
Chr1			17056802	17057469		AT1G45120:transposable_element_gene;AT1TE56445:transposable_element;		-34.463		hypo
Chr5			18258957	18260099		AT5TE65710:transposable_element;		-34.5215		hypo
Chr2			6029474	6030493		AT2G14230:transposable_element_gene;AT2G14240:transposable_element_gene;AT2TE24525:transposable_element;		-34.8361		hypo
Chr5			19199105	19199139		AT5G47300:CDS;		-35.508		hypo
Chr1			12987670	12987862		AT1TE42350:transposable_element;		-36.4807		hypo
Chr3			7902026	7902588		AT3G22350:CDS;		-36.6312		hypo
Chr1			13353181	13353236		Intergenic		-37.0928		hypo
Chr3			12348457	12349314		AT3G30720:five_prime_UTR;AT3G30722:transposable_element_gene;AT3TE51150:transposable_element;		-37.3359		hypo
Chr1			8837271	8837682		AT1G25220:CDS,three_prime_UTR;		-38.6279		hypo
Chr3			5986732	5986979		AT3G17500:CDS;		-41.1606		hypo
Chr3			9394068	9394169		AT3G25727:CDS;		-42.0695		hypo
Chr4			5987693	5988871		AT4G09455:transposable_element_gene;AT4TE25200:transposable_element;		-42.9399		hypo
Chr3			11097317	11098682		AT3G29120:transposable_element_gene;AT3TE46170:transposable_element;		-43.3144		hypo
Chr5			22703647	22705281		AT5G56060:CDS;AT5G56061:pseudogene;		-43.818		hypo
Chr1			6960000	6960060		Intergenic		-47.1216		hypo
Chr4			16141871	16142099		AT4G33585:CDS;		-47.1616		hypo

## Sheet: CG
Chromosome	5% start	5% end	10% start	10% end	5% annotation	10% annotation	5% meanDiff	10% meanDiff	5% direction	10% direction
Chr1	30160178	30160329	30160146	30160329	AT1G80190:CDS;	AT1G80190:CDS;	35.3947	33.4443	hyper	hyper
Chr2	10416944	10418988	2.40797e+07	2.42409e+07	AT2G24520:CDS;	AT2G24520:CDS;	33.473	20.0122	hyper	hyper
Chr1	12126701	12129056	2.48993e+07	25038929	AT1G33440:three_prime_UTR;	AT1G33440:three_prime_UTR;	33.4097	20.8257	hyper	hyper
Chr1	26911689	26913928	2.96442e+07	29659061	AT1G71400:three_prime_UTR;AT1G71410:three_prime_UTR;	AT1G71400:three_prime_UTR;AT1G71410:three_prime_UTR;	25.0683	20.8425	hyper	hyper
Chr3	11101085	11101160	2.44248e+07	2.45769e+07	AT3TE46185:transposable_element;	AT3G29130:three_prime_UTR;AT3TE46185:transposable_element;AT3TE46190:transposable_element;AT3TE46195:transposable_element;	31.4021	20.9411	hyper	hyper
Chr3	17743329	17745977	2.69698e+07	2.7055e+07	AT3G48060:CDS;	AT3G48060:CDS;	35.3417	21.0456	hyper	hyper
Chr1	2208632	2210270	1.95936e+07	1.98728e+07	AT1G07200:three_prime_UTR;	AT1G07200:five_prime_UTR,three_prime_UTR;	30.6473	21.2709	hyper	hyper
Chr1	3939857	3940087	2.04995e+07	2.07548e+07	AT1G11680:CDS;	AT1G11680:CDS;	45.9275	21.4235	hyper	hyper
Chr1	18773893	18775484	2.74227e+07	2.7496e+07	AT1G50660:three_prime_UTR;AT1G50670:three_prime_UTR;	AT1G50660:three_prime_UTR;AT1G50670:three_prime_UTR;	38.1701	21.4449	hyper	hyper
Chr4	9195635	9198466	2.32817e+07	23463884	AT4G16250:CDS;	AT4G16250:CDS;	27.6524	21.4695	hyper	hyper
Chr5	4537850	4538097	2.08446e+07	2.10908e+07	AT5G14060:CDS;	AT5G14060:CDS;	23.0848	21.9974	hyper	hyper
Chr4	10415702	10421942	2.40582e+07	2.42199e+07	AT4G19020:three_prime_UTR;AT4G19030:three_prime_UTR;	AT4G19020:CDS;	27.358	22.0072	hyper	hyper
Chr2	15024750	15026062	2.58698e+07	25983956	AT2G35738:ncRNA;AT2G35740:CDS;	AT2G35738:ncRNA;AT2G35740:CDS;	38.4462	22.2005	hyper	hyper
Chr2	14527185	14530922	25740438	2.5858e+07	AT2G34440:three_prime_UTR;AT2G34450:three_prime_UTR,five_prime_UTR;AT2G34460:three_prime_UTR,five_prime_UTR;AT2G34470:three_prime_UTR;	AT2G34440:CDS;	48.1159	22.2061	hyper	hyper
Chr3	17076108	17077206	2.66894e+07	2.6782e+07	AT3G46400:CDS;	AT3G46400:CDS;	36.3269	22.494	hyper	hyper
Chr3	2316460	2318686	1.96583e+07	1.99358e+07	AT3G07270:three_prime_UTR;AT3G07273:CDS;AT3G07274:pseudogene;	AT3G07270:three_prime_UTR;AT3G07273:CDS;AT3G07274:pseudogene;	26.3406	22.9218	hyper	hyper
Chr5	21877652	21880863	2.85658e+07	28609031	AT5G53890:three_prime_UTR;AT5G53895:five_prime_UTR;	AT5G53890:three_prime_UTR;AT5G53895:three_prime_UTR,five_prime_UTR;AT5G53900:three_prime_UTR;	26.2619	22.9775	hyper	hyper
Chr2	6698686	6698826	2.18151e+07	2.20358e+07	AT2G15370:CDS;	AT2G15370:CDS;	47.5859	24.1865	hyper	hyper
Chr2	10500752	10502532	2.4166e+07	2.43249e+07	AT2G24690:CDS;	AT2G24690:CDS;	29.7269	24.3136	hyper	hyper
Chr3	22266996	22267172	2.86089e+07	2.8651e+07	AT3G60240:CDS;	AT3G60240:CDS;	48.552	24.5388	hyper	hyper
Chr1	12551958	12553530	2.50287e+07	2.51649e+07	AT1G34370:three_prime_UTR;AT1G34380:three_prime_UTR;	AT1G34370:three_prime_UTR;AT1G34380:three_prime_UTR,five_prime_UTR;AT1G34390:CDS;AT1TE40900:transposable_element;	32.0317	24.8389	hyper	hyper
Chr5	16903595	16904080	2.656e+07	2.6656e+07	AT5G42270:CDS;	AT5G42270:CDS;	36.1937	24.8715	hyper	hyper
Chr2	19022965	19025539	2.75737e+07	2.7643e+07	AT2G46340:CDS;	AT2G46340:CDS;	40.1549	25.5222	hyper	hyper
Chr3	2203505	2204085	1.95721e+07	1.98518e+07	AT3G06980:CDS;	AT3G06980:CDS;	49.8331	26.1346	hyper	hyper
Chr3	14955054	14956462	2.58483e+07	2.5963e+07	AT3G42880:CDS;	AT3G42880:CDS;	38.9828	26.7152	hyper	hyper
Chr1	2360848	2363486	1.9723e+07	19998785	AT1G07650:CDS;	AT1G07650:three_prime_UTR;	20.8994	26.7189	hyper	hyper
Chr3	964253	966339	1.89466e+07	1.92428e+07	AT3G03790:CDS;	AT3G03790:CDS;	28.4637	26.7836	hyper	hyper
Chr2	13257339	13257347	2.53522e+07	2.54799e+07	AT2G31100:CDS;	AT2G31100:CDS;	38.1684	26.8147	hyper	hyper
Chr2	16932589	16933238	2.65816e+07	2.6677e+07	AT2G40540:CDS;	AT2G40540:CDS;	32.2573	26.97	hyper	hyper
Chr3	1092497	1093177	1.89897e+07	1.92848e+07	AT3G04160:CDS;	AT3G04160:CDS;	20.6697	27.182	hyper	hyper
Chr5	8325632	8327206	2.257e+07	2.27709e+07	AT5G24380:three_prime_UTR;AT5G24390:three_prime_UTR;	AT5G24380:CDS;	32.0171	27.2153	hyper	hyper
Chr3	2236282	2239309	1.96152e+07	19893782	AT3G07060:three_prime_UTR;AT3G07070:five_prime_UTR;	AT3G07060:three_prime_UTR;AT3G07070:five_prime_UTR;	23.8432	27.8164	hyper	hyper
Chr1	27800147	27801849	2.97952e+07	2.98061e+07	AT1G73950:CDS;	AT1G73950:five_prime_UTR;AT1G73960:three_prime_UTR;	33.1666	27.836	hyper	hyper
Chr2	14724317	14728953	2.58051e+07	2.5921e+07	AT2G34900:five_prime_UTR;AT2G34910:three_prime_UTR,five_prime_UTR;AT2G34920:three_prime_UTR;	AT2G34900:five_prime_UTR;AT2G34910:five_prime_UTR;	25.5968	28.3712	hyper	hyper
Chr5	15613292	15613370	2.60424e+07	2.6152e+07	AT5G39000:CDS;	AT5G39000:CDS;	34.3163	28.8115	hyper	hyper
Chr1	10254056	10257676	2.39288e+07	24093902	AT1G29310:three_prime_UTR;AT1G29320:five_prime_UTR;	AT1G29310:CDS;	45.299	28.9862	hyper	hyper
Chr1	26974379	26975217	2.96658e+07	2.96801e+07	AT1G71710:CDS;	AT1G71697:three_prime_UTR;AT1G71700:tRNA;AT1G71710:three_prime_UTR;	24.4028	29.0805	hyper	hyper
Chr1	2307763	2309228	1.96368e+07	1.99148e+07	AT1G07510:CDS;	AT1G07510:three_prime_UTR;AT1G07520:three_prime_UTR;	36.5734	29.1365	hyper	hyper
Chr4	5519663	5519680	2.12544e+07	2.14898e+07	NONE	NONE	53.2127	29.2035	hyper	hyper
Chr1	24889823	24891387	2.91697e+07	2.9197e+07	AT1G66730:CDS;	AT1G66730:CDS;	35.9351	29.2115	hyper	hyper
Chr3	5981165	5983680	2.14485e+07	21678833	AT3G17470:three_prime_UTR;AT3G17480:CDS;AT3TE25130:transposable_element;AT3TE25135:transposable_element;	AT3G17470:three_prime_UTR;AT3G17480:CDS;AT3TE25130:transposable_element;AT3TE25135:transposable_element;	40.7189	29.2157	hyper	hyper
Chr4	13668296	13670568	2.54601e+07	2.55849e+07	AT4G27290:CDS;AT4G27300:CDS;	AT4G27290:CDS;AT4G27300:CDS;	35.9069	29.4155	hyper	hyper
Chr4	17696564	17696633	2.69482e+07	27033986	AT4G37670:CDS;	AT4G37670:CDS;	44.1418	29.5409	hyper	hyper
Chr3	18127893	18128293	2.71423e+07	2.7223e+07	AT3G48880:CDS;	AT3G48880:three_prime_UTR;AT3G48890:three_prime_UTR,five_prime_UTR;AT3G48900:five_prime_UTR;	31.2576	29.7844	hyper	hyper
Chr4	17078654	17079349	2.6711e+07	2.6803e+07	AT4G36090:three_prime_UTR;	AT4G36090:three_prime_UTR;	22.0918	29.9002	hyper	hyper
Chr5	25946895	25946929	2.94717e+07	2.94911e+07	AT5G64930:CDS;	AT5G64930:CDS;	48.6953	30.1356	hyper	hyper
Chr1	1388640	1394546	1.92054e+07	1.94948e+07	AT1G04910:five_prime_UTR;AT1G04920:three_prime_UTR;	AT1G04900:three_prime_UTR;AT1G04910:three_prime_UTR,five_prime_UTR;AT1G04920:three_prime_UTR;	33.0065	30.2282	hyper	hyper
Chr3	9934029	9934213	2.36699e+07	2.38419e+07	AT3G26935:CDS;	AT3G26935:CDS;	38.5311	31.4082	hyper	hyper
Chr4	5184093	5187471	2.10387e+07	2.12798e+07	AT4G08210:CDS;AT4G08220:transposable_element_gene;AT4TE21570:transposable_element;AT4TE21575:transposable_element;	AT4G08210:CDS;AT4G08220:transposable_element_gene;AT4TE21570:transposable_element;AT4TE21575:transposable_element;	24.889	31.9917	hyper	hyper
Chr3	5657170	5660742	2.13191e+07	2.15528e+07	AT3G16610:CDS;AT3G16620:three_prime_UTR;	AT3G16610:CDS;AT3G16620:three_prime_UTR;	28.4695	32.0579	hyper	hyper
Chr5	8804434	8806814	2.28719e+07	2.30649e+07	AT5G25370:CDS;AT5TE31860:transposable_element;AT5TE31865:transposable_element;	AT5G25370:CDS;AT5TE31865:transposable_element;	20.3572	32.1033	hyper	hyper
Chr4	6067200	6067387	2.15563e+07	21783836	NONE	NONE	36.5568	32.1363	hyper	hyper
Chr5	10525393	10526721	2.42091e+07	2.43669e+07	AT5G28530:CDS;	AT5G28530:CDS;	28.1145	32.4271	hyper	hyper
Chr3	10640831	10640870	24230699	2.43879e+07	AT3G28410:CDS;	AT3G28410:CDS;	35.427	32.8214	hyper	hyper
Chr1	14062488	14062594	2.55895e+07	2.57109e+07	AT1TE46215:transposable_element;	AT1TE46215:transposable_element;	30.6716	33.1625	hyper	hyper
Chr3	457138	457434	1.86878e+07	1.89908e+07	AT3G02280:CDS;	AT3G02280:CDS;	35.9071	33.315	hyper	hyper
Chr2	10392661	10393399	2.40366e+07	24198905	AT2G24440:three_prime_UTR;AT2G24450:three_prime_UTR;	AT2G24440:three_prime_UTR;AT2G24450:three_prime_UTR;	39.3088	33.3155	hyper	hyper
Chr3	19044859	19047116	2.75953e+07	27664004	AT3G51310:CDS;	AT3G51310:CDS;	48.9649	33.4795	hyper	hyper
Chr5	1797872	1798058	1.93995e+07	19683776	AT5G05970:CDS;	AT5G05970:three_prime_UTR;AT5G05980:three_prime_UTR;	29.7544	33.759	hyper	hyper
Chr5	16043211	16043288	26171792	2.6278e+07	AT5G40090:CDS;	AT5G40090:CDS;	35.025	33.915	hyper	hyper
Chr2	270561	271659	1.85368e+07	18843752	AT2G01600:CDS;	AT2G01600:CDS;	34.6459	34.2406	hyper	hyper
Chr3	8711887	8714675	2.28072e+07	2.30019e+07	AT3G24130:five_prime_UTR;	AT3G24130:CDS;	29.5501	34.4564	hyper	hyper
Chr3	7058468	7062368	2.18798e+07	22098845	AT3G20240:three_prime_UTR;AT3G20250:three_prime_UTR;	AT3G20250:CDS;	21.1355	34.5822	hyper	hyper
Chr5	18143665	18146195	2.71855e+07	2.7265e+07	AT5G44925:transposable_element_gene;AT5TE65370:transposable_element;	AT5G44925:transposable_element_gene;AT5TE65370:transposable_element;	37.086	34.9131	hyper	hyper
Chr3	22820699	22820979	28759916	2.8798e+07	AT3G61670:CDS;	AT3G61670:CDS;	38.1797	34.94	hyper	hyper
Chr2	1785673	1787464	1.9378e+07	1.96628e+07	AT2G05040:transposable_element_gene;AT2TE08225:transposable_element;AT2TE08230:transposable_element;AT2TE08235:transposable_element;AT2TE08240:transposable_element;	AT2G05040:transposable_element_gene;AT2TE08225:transposable_element;AT2TE08230:transposable_element;AT2TE08235:transposable_element;AT2TE08240:transposable_element;	32.7006	35.1557	hyper	hyper
Chr4	9165919	9167871	2.32602e+07	2.34429e+07	AT4G16180:CDS;	AT4G16180:CDS;	38.734	35.3615	hyper	hyper
Chr1	9756822	9757139	2.3519e+07	2.36949e+07	AT1G28000:CDS;	AT1G28000:CDS;AT1TE31410:transposable_element;	34.7752	35.627	hyper	hyper
Chr5	13984630	13984741	25524761	2.56479e+07	AT5TE49850:transposable_element;	AT5TE49850:transposable_element;	43.4408	35.7315	hyper	hyper
Chr3	19761090	19761098	2.78756e+07	2.7937e+07	AT3G53300:CDS;	AT3G53300:CDS;	32.7725	35.7876	hyper	hyper
Chr3	1513234	1513835	1.92486e+07	1.95368e+07	AT3G05310:CDS;AT3G05320:three_prime_UTR;	AT3G05310:CDS;AT3G05320:three_prime_UTR;	41.9226	35.865	hyper	hyper
Chr2	17289042	17289136	2.67541e+07	2.6845e+07	NONE	NONE	40.5204	36.628	hyper	hyper
Chr2	7443225	7443248	2.22033e+07	22413854	AT2G17110:three_prime_UTR;	AT2G17110:three_prime_UTR;	41.7781	36.8862	hyper	hyper
Chr3	3823847	3824413	20348513	2.06078e+07	AT3G12010:CDS;AT3G12012:three_prime_UTR;	AT3G12010:CDS;AT3G12012:three_prime_UTR;	41.6726	36.9024	hyper	hyper
Chr1	16234326	16236645	2.63228e+07	2.6425e+07	AT1G43140:CDS;	AT1G43140:CDS;	33.4947	36.9395	hyper	hyper
Chr3	5815013	5815320	2.14053e+07	2.16368e+07	AT3G17050:transposable_element_gene;AT3TE24450:transposable_element;	AT3G17050:transposable_element_gene;AT3TE24450:transposable_element;	29.2476	37.4648	hyper	hyper
Chr4	2913633	2915784	2.00681e+07	2.03348e+07	AT4G05597:transposable_element_gene;AT4TE13555:transposable_element;AT4TE13560:transposable_element;	AT4G05597:transposable_element_gene;AT4TE13555:transposable_element;AT4TE13560:transposable_element;	40.2252	37.7614	hyper	hyper
Chr5	22146821	22146915	2.85874e+07	2.863e+07	AT5G54520:CDS;	AT5G54520:CDS;	37.7359	38.2769	hyper	hyper
Chr1	3096603	3099013	20132836	2.03978e+07	AT1G09570:five_prime_UTR;	AT1G09570:CDS;	39.5956	38.3533	hyper	hyper
Chr4	6269401	6272080	21642575	2.18678e+07	AT4G10020:three_prime_UTR;AT4G10030:three_prime_UTR;	AT4G10020:three_prime_UTR;AT4G10030:three_prime_UTR;	21.9676	38.8453	hyper	hyper
Chr5	22469248	22470408	2.86736e+07	28714034	AT5G55460:three_prime_UTR;AT5G55470:three_prime_UTR;	AT5G55460:three_prime_UTR;AT5G55470:three_prime_UTR;	21.1419	38.9811	hyper	hyper
Chr4	7122361	7122636	2.19445e+07	2.21618e+07	AT4G11840:CDS;	AT4G11840:CDS;	45.2338	39.0092	hyper	hyper
Chr4	5986122	5988799	2.147e+07	2.16998e+07	AT4G09452:pseudogene;AT4G09455:transposable_element_gene;AT4TE25195:transposable_element;AT4TE25200:transposable_element;	AT4G09440:CDS;AT4G09450:three_prime_UTR;AT4G09452:pseudogene;AT4G09455:transposable_element_gene;AT4TE25185:transposable_element;AT4TE25190:transposable_element;AT4TE25195:transposable_element;AT4TE25200:transposable_element;	35.3029	39.1643	hyper	hyper
Chr1	7279407	7280171	2.20955e+07	22308851	AT1G20910:CDS;	AT1G20910:CDS;	44.3136	39.1942	hyper	hyper
Chr3	818177	818470	1.88603e+07	19158761	AT3G03440:CDS;	AT3G03440:CDS;	34.1143	39.4348	hyper	hyper
Chr2	19246983	19247958	2.766e+07	2.7727e+07	AT2G46830:CDS;	AT2G46830:CDS;	44.0432	39.4986	hyper	hyper
Chr5	12662382	12662630	2.5115e+07	25248935	AT5G33390:CDS;	AT5G33390:five_prime_UTR;	47.0249	39.9826	hyper	hyper
Chr4	16118283	16118297	2.61934e+07	26298965	AT4G33510:CDS;	AT4G33510:three_prime_UTR;AT4G33520:five_prime_UTR;	52.0545	40.3704	hyper	hyper
Chr3	8998404	8998415	2.3066e+07	23253878	AT3G24650:CDS;	AT3G24650:CDS;	45.4078	40.4365	hyper	hyper
Chr5	13190732	13191296	25309084	2.54379e+07	AT5TE46910:transposable_element;	AT5TE46910:transposable_element;	35.086	40.5079	hyper	hyper
Chr1	7226831	7226835	2.20524e+07	2.22668e+07	AT1G20795:CDS;	AT1G20795:CDS;	45.0727	40.5649	hyper	hyper
Chr1	20787890	20788097	2.81992e+07	2.8252e+07	AT1G55620:CDS;	AT1G55620:five_prime_UTR;AT1G55625:tRNA;AT1G55630:three_prime_UTR;AT1TE68660:transposable_element;	45.4675	40.584	hyper	hyper
Chr5	12183386	12186098	2.49424e+07	2.50809e+07	AT5G32522:pseudogene;AT5TE43350:transposable_element;	AT5G32522:pseudogene;AT5TE43350:transposable_element;	30.2412	40.8445	hyper	hyper
Chr1	10830401	10831179	2.43385e+07	2.44929e+07	AT1G30570:CDS;	AT1G30570:CDS;	42.0387	40.9203	hyper	hyper
Chr2	10028431	10029899	23799345	2.39679e+07	AT2G23550:five_prime_UTR;AT2G23560:three_prime_UTR;	AT2G23550:five_prime_UTR;AT2G23560:three_prime_UTR;	42.632	41.6326	hyper	hyper
Chr4	14146657	14146980	2.56542e+07	25773950	AT4G28650:CDS;AT4G28652:ncRNA;	AT4G28650:CDS;AT4G28652:ncRNA;	40.4724	41.718	hyper	hyper
Chr3	18079621	18080736	2.71208e+07	2.7202e+07	AT3G48770:CDS;	AT3G48770:CDS;	43.158	42.1007	hyper	hyper
Chr1	10686425	10688290	2.42523e+07	24408911	AT1G30330:CDS;	AT1G30330:CDS;	29.4138	42.468	hyper	hyper
Chr3	97638	100089	1.8278e+07	1.85917e+07	AT3G01310:CDS;	AT3G01310:CDS;	21.336	42.5567	hyper	hyper
Chr3	431608	433356	1.86662e+07	1.89698e+07	AT3G02260:CDS;	AT3G02260:CDS;	45.421	42.6663	hyper	hyper
Chr1	27125720	27126487	2.97305e+07	2.97431e+07	AT1G72090:CDS;	AT1G72090:CDS;	26.1336	42.7704	hyper	hyper
Chr3	17013820	17014259	2.66463e+07	2.674e+07	AT3G46290:CDS;	AT3G46290:CDS;	41.2908	42.9015	hyper	hyper
Chr4	12846970	12846974	2.52012e+07	2.53329e+07	AT4G24980:CDS;	AT4G24980:CDS;	34.9457	43.1053	hyper	hyper
Chr1	5163707	5163897	2.10171e+07	21258821	AT1G14970:CDS;	AT1G14970:CDS;	39.5238	43.1383	hyper	hyper
Chr4	17888746	17889061	2.70129e+07	2.7097e+07	AT4G38120:CDS;	AT4G38120:CDS;	24.45	43.2252	hyper	hyper
Chr3	7737826	7738753	22289606	2.24979e+07	AT3G21960:CDS;	AT3G21960:three_prime_UTR;	49.8717	43.2292	hyper	hyper
Chr2	4149832	4150786	2.06505e+07	2.09018e+07	AT2TE17565:transposable_element;	AT2TE17565:transposable_element;	38.4681	43.3904	hyper	hyper
Chr5	17386259	17387893	2.67973e+07	2.6887e+07	AT5G43320:CDS;	AT5G43320:CDS;	29.2701	43.8508	hyper	hyper
Chr3	6505104	6505150	2.17504e+07	2.19728e+07	AT3G18860:mRNA;	AT3G18860:mRNA;	48.7525	43.8638	hyper	hyper
Chr5	8893358	8893385	2.29582e+07	23148875	NONE	NONE	39.3992	44.2818	hyper	hyper
Chr4	8027894	8027979	2.24621e+07	2.26659e+07	AT4G13880:CDS;	AT4G13880:CDS;	45.5076	44.3955	hyper	hyper
Chr4	12397478	12397703	2.50071e+07	25143932	AT4G23820:CDS;	AT4G23820:CDS;	35.5165	44.4698	hyper	hyper
Chr1	20247200	20248994	2.80482e+07	2.8105e+07	AT1G54220:CDS;	AT1G54220:CDS;	38.714	44.6668	hyper	hyper
Chr2	8972259	8972438	2.30013e+07	2.31909e+07	AT2G20840:CDS;	AT2G20840:CDS;	41.2698	44.6705	hyper	hyper
Chr1	1914236	1914487	1.94642e+07	1.97468e+07	AT1G06250:CDS;	AT1G06250:CDS;	36.9035	45.1209	hyper	hyper
Chr1	29258091	29259536	2.99246e+07	2.99321e+07	AT1G77800:CDS;	AT1G77800:CDS;	50.0206	46.1221	hyper	hyper
Chr1	3953224	3955105	2.05211e+07	2.07758e+07	AT1G11720:CDS;	AT1G11720:CDS;	40.6177	46.4146	hyper	hyper
Chr1	20381826	20381833	28112885	2.8168e+07	AT1G54570:CDS;	AT1G54570:CDS;	32.9374	46.7156	hyper	hyper
Chr4	8423707	8425525	2.26131e+07	2.28129e+07	AT4G14700:three_prime_UTR;AT4G14710:three_prime_UTR;	AT4G14700:CDS;	29.6894	46.7375	hyper	hyper
Chr2	18815511	18817117	2.74443e+07	2.7517e+07	AT2G45670:three_prime_UTR;	AT2G45670:three_prime_UTR;	43.7834	46.8867	hyper	hyper
Chr1	10175300	10177620	2.3864e+07	2.40309e+07	AT1G29120:CDS;	AT1G29120:three_prime_UTR;	26.6341	47.3829	hyper	hyper
Chr4	4250381	4251153	2.07152e+07	2.09648e+07	NONE	AT4TE18250:transposable_element;	29.1199	47.7488	hyper	hyper
Chr1	17559517	17559531	2.68835e+07	2.6971e+07	AT1G47710:CDS;	AT1G47710:CDS;	49.4234	48.0874	hyper	hyper
Chr4	18291964	18291981	27250177	2.7328e+07	AT4G39330:CDS;	AT4G39330:CDS;	32.9595	48.5111	hyper	hyper
Chr2	13717360	13717656	2.54816e+07	2.56059e+07	AT2G32291:pseudogene;	AT2G32291:pseudogene;	44.3411	48.6178	hyper	hyper
Chr1	10007352	10007395	2.37346e+07	2.39049e+07	NONE	NONE	39.1981	48.7487	hyper	hyper
Chr4	7077887	7077891	2.1923e+07	2.21408e+07	AT4G11750:CDS;	AT4G11750:CDS;	35.6272	48.906	hyper	hyper
Chr2	8349654	8349738	2.25916e+07	2.27919e+07	AT2G19240:CDS;	AT2G19240:CDS;	42.6133	49.5722	hyper	hyper
Chr2	18946450	18948921	2.7509e+07	2.758e+07	AT2G46070:five_prime_UTR;AT2G46080:three_prime_UTR;	AT2G46070:five_prime_UTR;AT2G46080:three_prime_UTR;	22.9445	49.6202	hyper	hyper
Chr2	828501	828651	1.88819e+07	1.91798e+07	AT2G02860:three_prime_UTR;	AT2G02860:three_prime_UTR;	36.1715	49.7758	hyper	hyper
Chr4	9375228	9375887	2.33896e+07	23568887	AT4G16650:CDS;	AT4G16650:CDS;	44.6057	50.3878	hyper	hyper
Chr4	13255909	13256371	2.53307e+07	25458941	AT4G26160:CDS;	AT4G26160:CDS;	25.2576	50.7471	hyper	hyper
Chr1	17625363	17626367	2.69051e+07	2.6992e+07	AT1G47860:transposable_element_gene;AT1TE58505:transposable_element;	AT1G47860:transposable_element_gene;AT1TE58500:transposable_element;AT1TE58505:transposable_element;	30.5279	50.9087	hyper	hyper
Chr4	13150195	13150206	2.52659e+07	2.53959e+07	AT4G25870:CDS;	AT4G25870:CDS;	48.5581	51.8137	hyper	hyper
Chr1	20275233	20275439	2.80697e+07	2.8126e+07	AT1G54310:three_prime_UTR;	AT1G54310:three_prime_UTR,five_prime_UTR;AT1G54320:three_prime_UTR;AT1TE66980:transposable_element;AT1TE66985:transposable_element;	41.0886	52.0486	hyper	hyper
Chr5	13832425	13834815	2.55032e+07	2.56269e+07	AT5G35630:three_prime_UTR;AT5G35631:CDS;AT5G35640:CDS;	AT5G35640:CDS;	43.8709	52.3043	hyper	hyper
Chr2	8433935	8434946	2.26347e+07	22833866	AT2G19470:CDS;	AT2G19470:CDS;	36.4279	52.5882	hyper	hyper
Chr5	14280967	14281003	2.56757e+07	2.5795e+07	AT5TE51035:transposable_element;	AT5TE51035:transposable_element;	47.9974	53.0526	hyper	hyper
Chr4	224810	224857	1.8429e+07	18738749	AT4G00490:CDS;	AT4G00490:three_prime_UTR;AT4G00500:three_prime_UTR;	41.5124	53.6271	hyper	hyper
Chr1	6256834	6257359	2.1621e+07	2.18468e+07	AT1G18180:CDS;	AT1G18180:CDS;	42.1498	54.2969	hyper	hyper
Chr4	5084347	5085521	20995544	2.12378e+07	AT4G08110:transposable_element_gene;AT4TE21115:transposable_element;	AT4G08110:transposable_element_gene;AT4TE21115:transposable_element;	50.4337	56.5846	hyper	hyper
Chr2	16728900	16730259	2.64737e+07	2.6572e+07	AT2G40070:CDS;	AT2G40070:CDS;	44.6379	56.7337	hyper	hyper
Chr4	12639604	12639618	25093407	2.52279e+07	AT4G24450:CDS;	AT4G24450:CDS;	34.0477	58.9244	hyper	hyper
Chr1	23377128	23377143	2.88893e+07	28924040	AT1G63050:CDS;	AT1G63050:CDS;	46.6716	59.5901	hyper	hyper
Chr3	3337855	3345008	2.0176e+07	2.04398e+07	AT3G10680:CDS;AT3G10690:three_prime_UTR;	AT3G10680:CDS;	28.8958	-49.6076	hyper	hypo
Chr4	12753310	12755755	2.51581e+07	2.52909e+07	AT4G24730:five_prime_UTR;AT4G24740:three_prime_UTR;	AT4G24740:CDS;	26.6448	-41.0986	hyper	hypo
Chr5	9067412	9067435	2.31954e+07	2.33799e+07	AT5G25970:CDS;	AT5G25970:CDS;	37.1077	-38.9104	hyper	hypo
Chr1	24736827	24739092	2.91266e+07	2.9155e+07	AT1G66340:three_prime_UTR;AT1G66345:CDS;	AT1G66340:three_prime_UTR;AT1G66345:CDS;	28.371	-28.9709	hyper	hypo
Chr2	16335041	16335390	2.63443e+07	2.6446e+07	AT2G39170:CDS;	AT2G39140:three_prime_UTR;AT2G39160:CDS;AT2G39170:three_prime_UTR;	24.2204	-22.4204	hyper	hypo
Chr4	9513179	9514834	2.34327e+07	2.36109e+07	AT4G16900:CDS;	AT4G16900:CDS;	35.7687	-21.9381	hyper	hypo
Chr4	12853157	12853259	2.52228e+07	25353938	AT4G25000:CDS;	AT4G25000:CDS;	38.1134	-21.8451	hyper	hypo
Chr5	17037971	17038059	2.66678e+07	2.6761e+07	NONE	AT5G42591:CDS;AT5TE61510:transposable_element;	38.9743	-21.8375	hyper	hypo
Chr2	9065995	9066897	2.31739e+07	23358881	AT2G21150:CDS;	AT2G21150:three_prime_UTR;AT2G21160:three_prime_UTR,five_prime_UTR;AT2G21170:three_prime_UTR;	31.573	-21.7619	hyper	hypo
Chr1	30088907	30090204	30088888	30090999	AT1G79990:CDS;	AT1G79990:CDS;	31.6045	-21.1327	hyper	hypo
Chr5	21708807	21709392	2.85227e+07	2.8567e+07	AT5G53460:CDS;	AT5G53460:CDS;	21.6621	-20.1004	hyper	hypo
Chr1	25291874	25293203			AT1G67500:CDS;		55.2121		hyper
Chr1	26623719	26625698			AT1G70610:CDS;		53.7507		hyper
Chr1	15731039	15731137			NONE		52.7158		hyper
Chr4	5808487	5808512			NONE		51.2973		hyper
Chr1	7010962	7011669			AT1G20230:CDS;		49.41		hyper
Chr2	10374656	10374669			AT2G24390:three_prime_UTR;		48.3758		hyper
Chr3	16014273	16014581			AT3G44340:CDS;		48.2049		hyper
Chr2	17779937	17780395			AT2G42700:CDS;		48.0458		hyper
Chr5	20755544	20755550			AT5G51050:CDS;		47.9634		hyper
Chr4	15152283	15152564			AT4G31160:CDS;		47.7477		hyper
Chr2	19400472	19400500			AT2G47250:CDS;		47.5918		hyper
Chr2	14101118	14101590			AT2G33260:CDS;		47.4032		hyper
Chr3	4133482	4134025			AT3G12950:CDS;		47.3711		hyper
Chr3	4566092	4566154			AT3G13870:CDS;		47.3314		hyper
Chr4	10441695	10442543			AT4G19050:CDS;		46.9349		hyper
Chr5	6846231	6847235			AT5G20280:CDS;		46.6261		hyper
Chr1	8837242	8838362			AT1G25220:three_prime_UTR;		45.8275		hyper
Chr2	763766	764330			AT2G02720:CDS;		44.5809		hyper
Chr4	18197995	18199893			AT4G39050:CDS;		44.5449		hyper
Chr1	21091274	21091281			AT1G56340:mRNA;		44.1207		hyper
Chr4	7465194	7468655			AT4G12640:three_prime_UTR;AT4G12650:three_prime_UTR;		43.442		hyper
Chr3	1610733	1611182			AT3G05545:CDS;		43.4124		hyper
Chr5	13673658	13675547			AT5G35460:three_prime_UTR;		43.4078		hyper
Chr2	18824439	18824454			AT2G45690:CDS;		43.3631		hyper
Chr5	25013833	25013991			AT5G62270:CDS;		43.2957		hyper
Chr2	8768845	8770758			AT2G20320:CDS;		43.2518		hyper
Chr1	29401031	29401124			AT1G78130:CDS;		43.2352		hyper
Chr4	5698411	5699902			AT4G08895:CDS;AT4TE23830:transposable_element;		42.9634		hyper
Chr1	2572700	2572785			AT1G08190:CDS;		42.9161		hyper
Chr3	8794714	8794739			AT3G24260:CDS;		42.6037		hyper
Chr2	18542868	18543287			AT2G44950:CDS;		42.2215		hyper
Chr3	2018056	2019183			AT3G06510:CDS;		41.7927		hyper
Chr2	8801176	8801282			AT2G20400:CDS;		41.7402		hyper
Chr3	19799658	19799669			AT3G53400:CDS;AT3G53402:three_prime_UTR;		41.6098		hyper
Chr4	15601616	15604368			AT4G32300:three_prime_UTR;AT4G32320:five_prime_UTR;		41.5479		hyper
Chr2	16478324	16479128			AT2G39480:CDS;		41.2657		hyper
Chr5	4250895	4253176			AT5G13280:three_prime_UTR;AT5G13290:three_prime_UTR;		41.1525		hyper
Chr1	25902864	25905998			AT1G68890:CDS;		41.0153		hyper
Chr3	9538322	9539568			AT3G26100:five_prime_UTR;		40.5876		hyper
Chr4	14868193	14868351			AT4G30400:CDS;		40.5388		hyper
Chr4	15266748	15266817			AT4G31480:CDS;		40.4659		hyper
Chr1	11676139	11678202			AT1G32361:three_prime_UTR;AT1G32370:three_prime_UTR,five_prime_UTR;		40.4112		hyper
Chr1	30402237	30403071			AT1G80910:CDS;		39.8796		hyper
Chr4	11247295	11247430			AT4G21065:CDS;		39.605		hyper
Chr1	22613370	22614721			AT1G61310:CDS;		39.3155		hyper
Chr2	14375500	14377034			AT2G34030:CDS;		39.1204		hyper
Chr4	15122492	15124485			AT4G31080:three_prime_UTR;AT4G31100:five_prime_UTR;		39.0808		hyper
Chr3	6635808	6636805			AT3G19180:three_prime_UTR;		38.9396		hyper
Chr3	4150769	4153120			AT3G12980:CDS;		38.6455		hyper
Chr1	28024426	28026422			AT1G74590:five_prime_UTR;AT1G74600:CDS;		38.5972		hyper
Chr3	9818609	9820954			AT3G26720:CDS;		38.1903		hyper
Chr5	10303456	10303633			AT5G28320:CDS;		38.182		hyper
Chr3	17595441	17598037			AT3G47730:CDS;		38.1327		hyper
Chr4	5816247	5817752			AT4G09130:CDS;AT4G09140:three_prime_UTR;		37.9273		hyper
Chr4	13931521	13934238			AT4G28010:three_prime_UTR;AT4G28020:three_prime_UTR;		37.9142		hyper
Chr2	13087600	13090153			AT2G30710:five_prime_UTR;AT2G30720:three_prime_UTR;		37.8882		hyper
Chr2	9145989	9148889			AT2G21380:three_prime_UTR;		37.8329		hyper
Chr1	9535697	9535705			AT1G27460:CDS;		37.5928		hyper
Chr3	18274106	18274954			AT3G49290:CDS;		37.3283		hyper
Chr3	20600954	20601573			AT3G55550:CDS;		37.2277		hyper
Chr5	2655123	2655233			AT5G08250:CDS;		37.1818		hyper
Chr3	11689194	11689230			AT3TE48540:transposable_element;		36.9848		hyper
Chr2	6322504	6323190			AT2G14760:CDS;		36.8622		hyper
Chr3	15869236	15869245			AT3G44110:CDS;		36.769		hyper
Chr4	18475393	18477061			AT4G39810:CDS;AT4G39820:three_prime_UTR;		36.7661		hyper
Chr5	19230483	19232124			AT5G47400:CDS;		36.6844		hyper
Chr3	8566165	8566182			AT3G23770:CDS;		36.6402		hyper
Chr3	12784977	12785092			AT3G31425:pseudogene;		36.462		hyper
Chr4	7410048	7410060			AT4G12490:CDS;		36.4447		hyper
Chr5	20773009	20773961			AT5G51090:CDS;AT5G51100:three_prime_UTR;		36.2799		hyper
Chr2	4746538	4746559			AT2G11810:three_prime_UTR;		36.1694		hyper
Chr5	17210895	17213140			AT5G42930:CDS;AT5TE62180:transposable_element;		36.0245		hyper
Chr5	2057496	2059350			AT5G06680:CDS;		35.9964		hyper
Chr4	9811190	9811524			AT4G17610:CDS;		35.8475		hyper
Chr5	18325076	18325103			AT5G45250:CDS;		35.6208		hyper
Chr5	13014244	13014252			AT5TE46235:transposable_element;		35.5115		hyper
Chr5	20999603	20999809			AT5G51690:CDS;		35.0485		hyper
Chr5	1091379	1092418			AT5G04040:CDS;		35.0337		hyper
Chr2	12512935	12514053			AT2G29120:CDS;		34.8896		hyper
Chr3	3462680	3462709			AT3G11040:CDS;		34.5646		hyper
Chr3	16537977	16540063			AT3G45170:three_prime_UTR;AT3G45180:CDS;AT3TE67035:transposable_element;AT3TE67040:transposable_element;		34.3746		hyper
Chr1	17351824	17353169			AT1G47330:CDS;		34.0139		hyper
Chr3	8430659	8432664			AT3G23510:CDS;		33.954		hyper
Chr4	5787494	5788653			AT4G09020:CDS;		33.9334		hyper
Chr1	23265185	23265824			AT1G62830:CDS;		33.8064		hyper
Chr1	24666385	24667622			AT1G66210:CDS;		33.7431		hyper
Chr5	20290036	20290635			AT5G49890:CDS;		33.5076		hyper
Chr2	363414	365708			AT2G01830:CDS;		33.4986		hyper
Chr1	22981182	22981228			AT1G62190:CDS;		33.438		hyper
Chr4	1363137	1364057			AT4G03080:CDS;		33.3422		hyper
Chr4	418694	418731			AT4G00970:CDS;		33.1676		hyper
Chr3	20233485	20233517			AT3TE82235:transposable_element;		33.1327		hyper
Chr3	7408749	7408763			AT3G21130:CDS;		32.8611		hyper
Chr1	9734138	9737288			AT1G27940:CDS;		32.6989		hyper
Chr1	23852417	23854075			AT1G64270:transposable_element_gene;AT1G64280:three_prime_UTR;AT1TE78490:transposable_element;		32.093		hyper
Chr3	5028585	5028621			AT3G14940:CDS;		31.9894		hyper
Chr1	1901007	1901073			AT1G06220:CDS;		31.9785		hyper
Chr3	13883248	13884343			AT3TE57065:transposable_element;AT3TE57070:transposable_element;AT3TE57075:transposable_element;AT3TE57080:transposable_element;AT3TE57085:transposable_element;		31.9065		hyper
Chr4	5319621	5323501			AT4G08395:CDS;AT4TE22150:transposable_element;AT4TE22155:transposable_element;AT4TE22160:transposable_element;		31.7378		hyper
Chr1	6889554	6890846			AT1G19850:CDS;		31.5325		hyper
Chr4	17479396	17480924			AT4G37100:CDS;		31.4672		hyper
Chr3	17857699	17857758			AT3G48230:CDS;		31.4133		hyper
Chr4	518470	518480			AT4G01240:CDS;		31.3941		hyper
Chr5	4888071	4888528			AT5G15080:CDS;		31.0879		hyper
Chr4	5027226	5027302			AT4TE20975:transposable_element;		30.8468		hyper
Chr3	2747749	2747778			AT3G09000:CDS;		30.7968		hyper
Chr3	12592362	12593173			AT3G30841:CDS;		30.7343		hyper
Chr5	1260658	1261008			AT5G04460:CDS;		30.6145		hyper
Chr5	24779502	24779621			AT5G61660:CDS;		30.5996		hyper
Chr3	921694	922853			AT3G03710:CDS;		30.5273		hyper
Chr4	13925841	13925853			AT4G28000:CDS;		30.2803		hyper
Chr5	8096756	8096763			AT5G23970:CDS;		30.2797		hyper
Chr4	17327721	17333114			AT4G36760:three_prime_UTR;AT4G36770:three_prime_UTR,five_prime_UTR;AT4G36780:three_prime_UTR;		30.2186		hyper
Chr2	6862615	6862639			AT2TE27945:transposable_element;		30.2032		hyper
Chr4	16435720	16436829			AT4G34370:CDS;		30.0789		hyper
Chr5	23242740	23243859			AT5G57360:CDS;		30.0637		hyper
Chr5	11372777	11375137			AT5G30428:transposable_element_gene;AT5TE41155:transposable_element;AT5TE41160:transposable_element;AT5TE41165:transposable_element;AT5TE41170:transposable_element;AT5TE41175:transposable_element;AT5TE41180:transposable_element;		30.0149		hyper
Chr3	6253707	6254585			AT3G18230:three_prime_UTR;		29.8961		hyper
Chr3	9456195	9458754			AT3G25840:five_prime_UTR;AT3G25850:CDS;AT3TE39470:transposable_element;		29.7373		hyper
Chr5	25720265	25720375			AT5G64300:CDS;		29.6318		hyper
Chr2	12826341	12827900			AT2G30050:three_prime_UTR;AT2G30060:five_prime_UTR;		29.2974		hyper
Chr2	14773905	14776281			AT2G35050:three_prime_UTR;AT2G35060:three_prime_UTR;		29.0949		hyper
Chr4	421572	421589			AT4G00970:CDS;		28.9541		hyper
Chr1	28076973	28077392			AT1G74720:CDS;		28.6497		hyper
Chr2	9947600	9947659			NONE		28.5861		hyper
Chr2	13573165	13573185			AT2G31910:CDS;		28.4738		hyper
Chr1	2803411	2807708			AT1G08750:three_prime_UTR;AT1G08760:five_prime_UTR;		28.4287		hyper
Chr1	9928699	9931525			AT1G28323:transposable_element_gene;AT1TE32015:transposable_element;		28.3667		hyper
Chr4	10787458	10789527			AT4G19890:CDS;AT4G19900:three_prime_UTR;		28.2734		hyper
Chr3	21019098	21022767			AT3G56750:five_prime_UTR;AT3G56760:three_prime_UTR;		28.1603		hyper
Chr5	26010888	26011619			AT5G65110:CDS;		28.1273		hyper
Chr1	1149180	1149869			AT1G04300:CDS;		28.017		hyper
Chr4	10306494	10307042			AT4G18750:CDS;		27.6474		hyper
Chr1	2479451	2483658			AT1G07990:three_prime_UTR;AT1G08000:three_prime_UTR;		27.6314		hyper
Chr3	16505628	16506780			AT3G45100:CDS;		27.4749		hyper
Chr5	2462185	2462327			AT5G07740:CDS;		27.298		hyper
Chr5	24340654	24341914			AT5G60548:three_prime_UTR;AT5G60550:CDS;		27.1059		hyper
Chr4	10040879	10044965			AT4G18120:three_prime_UTR;AT4G18130:three_prime_UTR;		27.0005		hyper
Chr4	7064289	7066367			AT4G11720:CDS;		26.9634		hyper
Chr3	9552031	9553790			AT3G26125:CDS;AT3G26130:CDS;		26.9124		hyper
Chr3	4664027	4666166			AT3G14075:CDS;		26.8789		hyper
Chr1	22475856	22476353			AT1G61010:CDS;		26.7543		hyper
Chr2	1640772	1640782			AT2G04680:CDS;		26.7368		hyper
Chr4	11005902	11005944			AT4G20380:CDS;		26.5826		hyper
Chr5	21522576	21525228			AT5G53080:three_prime_UTR;AT5G53090:five_prime_UTR;		26.3166		hyper
Chr3	18984675	18988411			AT3G51110:three_prime_UTR;AT3G51120:three_prime_UTR;		25.8095		hyper
Chr5	17222881	17229555			AT5G42950:CDS;		25.6826		hyper
Chr5	3409803	3415913			AT5G10780:three_prime_UTR;AT5G10790:three_prime_UTR,five_prime_UTR;AT5G10800:three_prime_UTR;		25.0362		hyper
Chr1	26807649	26808077			AT1G71070:CDS;		24.9896		hyper
Chr3	53091	55231			AT3G01150:three_prime_UTR;AT3G01160:three_prime_UTR;		24.671		hyper
Chr5	8459501	8461054			AT5G24710:CDS;		24.458		hyper
Chr3	795469	797899			AT3G03360:three_prime_UTR;AT3G03370:three_prime_UTR;		24.3453		hyper
Chr1	123448	125720			AT1G01320:CDS;		23.8745		hyper
Chr5	8758272	8759665			AT5G25270:CDS;		23.83		hyper
Chr3	18498093	18498268			AT3G49880:CDS;		23.4781		hyper
Chr5	4057962	4058205			AT5G12850:CDS;		23.3991		hyper
Chr1	7586389	7587619			AT1G21630:CDS;		23.2378		hyper
Chr1	688581	691328			AT1G03000:CDS;		23.0369		hyper
Chr3	8255799	8256327			AT3G23150:CDS;		23.0232		hyper
Chr1	5746120	5752102			AT1G16800:CDS;		22.689		hyper
Chr2	7590505	7592538			AT2G17480:three_prime_UTR;		22.4158		hyper
Chr1	5569071	5569261			AT1G16280:CDS;		22.4133		hyper
Chr4	11452001	11452441			AT4G21530:CDS;		22.3574		hyper
Chr1	22566259	22566873			AT1G61210:CDS;		22.2283		hyper
Chr5	17539896	17540000			AT5G43670:CDS;		22.1956		hyper
Chr3	2789113	2791949			AT3G09100:three_prime_UTR;		22.1807		hyper
Chr3	10677189	10678516			AT3G28480:five_prime_UTR;		21.9989		hyper
Chr2	9505100	9505404			AT2G22400:CDS;		21.9812		hyper
Chr3	11752187	11754894			AT3G30120:pseudogene;		21.8638		hyper
Chr1	7175001	7175230			AT1G20690:five_prime_UTR;AT1G20691:ncRNA;		21.6939		hyper
Chr1	27315035	27315234			AT1G72540:CDS;		21.6489		hyper
Chr1	1116314	1118652			AT1G04210:CDS;		21.5819		hyper
Chr1	24694106	24697181			AT1G66250:three_prime_UTR;AT1G66260:three_prime_UTR;		21.507		hyper
Chr2	9573598	9576041			AT2G22530:CDS;		21.3172		hyper
Chr2	14561872	14562408			AT2G34560:CDS;		21.093		hyper
Chr1	11882221	11885702			AT1G32810:CDS;		21.0318		hyper
Chr3	19610216	19611752			AT3G52890:CDS;		20.9687		hyper
Chr2	17952546	17954356			AT2G43160:three_prime_UTR;AT2G43180:three_prime_UTR;		20.9236		hyper
Chr4	16415698	16418856			AT4G34310:three_prime_UTR;		20.9083		hyper
Chr3	2281305	2282697			AT3G07170:three_prime_UTR;AT3G07180:three_prime_UTR;		20.8409		hyper
Chr3	8160388	8162326			AT3G22980:CDS;AT3TE34225:transposable_element;		20.721		hyper
Chr3	11591615	11593408			AT3G29760:CDS;AT3G29762:pseudogene;AT3TE48195:transposable_element;		20.7128		hyper
Chr5	6902303	6903010			AT5G20420:CDS;		20.5143		hyper
Chr2	10216987	10218247			AT2G24010:CDS;AT2G24020:three_prime_UTR;		20.4688		hyper
Chr5	9958351	9959324			AT5G27930:CDS;		20.2412		hyper
Chr4	8989385	8990290	2.30445e+07	2.32329e+07	AT4G15810:CDS;	AT4G15810:CDS;	-22.241	20.1124	hypo	hyper
Chr1	21748954	21751008	28544239	2.8588e+07	AT1G58561:transposable_element_gene;AT1G58602:mRNA;AT1TE71775:transposable_element;	AT1G58561:transposable_element_gene;AT1G58602:mRNA;AT1TE71775:transposable_element;	-30.6759	20.9033	hypo	hyper
Chr4	13179909	13181117	2.52875e+07	2.54169e+07	AT4G25960:CDS;	AT4G25960:CDS;	-23.3812	20.9555	hypo	hyper
Chr1	24371951	24374817	2.90403e+07	2.9071e+07	AT1G65560:five_prime_UTR;AT1G65570:CDS;	AT1G65550:CDS;AT1G65560:three_prime_UTR;	-30.987	21.653	hypo	hyper
Chr2	9880813	9881003	2.36484e+07	2.38209e+07	AT2G23200:CDS;	AT2G23200:CDS;	-37.2156	21.7235	hypo	hyper
Chr4	11347018	11347873	2.45326e+07	2.46819e+07	AT4G21326:CDS;	AT4G21326:CDS;	-28.5999	22.2185	hypo	hyper
Chr4	14038849	14040243	2.55679e+07	2.56899e+07	AT4G28370:three_prime_UTR;AT4G28380:CDS;	AT4G28370:three_prime_UTR;AT4G28380:CDS;AT4G28390:three_prime_UTR;	-32.7106	22.416	hypo	hyper
Chr1	3371963	3375895	2.01975e+07	2.04608e+07	AT1G10290:CDS;	AT1G10290:CDS;	-33.9402	22.7427	hypo	hyper
Chr2	5298538	5303152	2.11034e+07	2.13428e+07	AT2G12910:transposable_element_gene;AT2G12920:transposable_element_gene;AT2TE21605:transposable_element;	AT2G12910:transposable_element_gene;AT2TE21605:transposable_element;	-26.287	23.2319	hypo	hyper
Chr2	5472016	5473523	2.11897e+07	2.14268e+07	AT2G13200:transposable_element_gene;AT2TE22185:transposable_element;	AT2G13200:transposable_element_gene;AT2TE22185:transposable_element;	-22.5095	26.2175	hypo	hyper
Chr4	14628918	14629529	2.57836e+07	2.59e+07	AT4G29910:CDS;	AT4G29910:CDS;	-32.4329	26.8012	hypo	hyper
Chr2	18179837	18182100	2.7207e+07	2.7286e+07	AT2G43900:CDS;	AT2G43900:CDS;	-45.6034	27.6479	hypo	hyper
Chr5	8641917	8642395	2.27857e+07	2.29809e+07	AT5G25070:CDS;	AT5G25070:CDS;	-32.956	28.0138	hypo	hyper
Chr5	19011795	19011805	2.75521e+07	2.7622e+07	AT5G46850:CDS;	AT5G46850:CDS;	-40.3909	28.7264	hypo	hyper
Chr5	16792105	16795305	2.65169e+07	26613974	AT5G41970:three_prime_UTR;AT5G41980:three_prime_UTR,five_prime_UTR;AT5G41990:three_prime_UTR;AT5G41992:three_prime_UTR;	AT5G41970:three_prime_UTR;AT5G41980:three_prime_UTR,five_prime_UTR;AT5G41990:three_prime_UTR;AT5G41992:three_prime_UTR;	-23.2626	28.7395	hypo	hyper
Chr3	280636	284193	1.85584e+07	1.88648e+07	AT3G01780:three_prime_UTR;AT3G01790:three_prime_UTR;	AT3G01780:CDS;	-29.0146	29.4756	hypo	hyper
Chr1	10718604	10719885	2.42738e+07	2.44299e+07	AT1G30360:three_prime_UTR;AT1G30370:CDS;	AT1G30370:CDS;	-22.2503	30.6654	hypo	hyper
Chr4	15092023	15092806	2.59345e+07	2.6047e+07	AT4G30990:CDS;	AT4G30990:CDS;	-37.8818	32.1513	hypo	hyper
Chr4	8999897	9004139	2.30876e+07	2.32749e+07	AT4G15840:three_prime_UTR;AT4G15850:five_prime_UTR;	AT4G15850:three_prime_UTR;AT4G15860:transposable_element_gene;AT4TE40350:transposable_element;AT4TE40355:transposable_element;	-46.6188	36.0977	hypo	hyper
Chr2	16616430	16617790	2.64306e+07	2.653e+07	AT2G39810:CDS;	AT2G39810:CDS;	-42.1399	45.182	hypo	hyper
Chr5	21689951	21691836	2.85011e+07	2.8546e+07	AT5G53450:CDS;	AT5G53450:CDS;	-39.1935	-70.0443	hypo	hypo
Chr3	17242166	17243166	2.67326e+07	26823980	AT3G46820:three_prime_UTR;	AT3G46820:three_prime_UTR;	-56.6482	-62.9305	hypo	hypo
Chr3	3849382	3851729	2.03916e+07	2.06498e+07	AT3G12080:three_prime_UTR;	AT3G12080:three_prime_UTR;	-51.6758	-61.7965	hypo	hypo
Chr1	6368403	6368418	2.17073e+07	2.19308e+07	AT1G18490:CDS;	AT1G18490:CDS;	-46.9881	-60.4932	hypo	hypo
Chr4	9615736	9620353	2.34543e+07	2.36319e+07	AT4G17140:CDS;	AT4G17140:CDS;	-32.4727	-59.6577	hypo	hypo
Chr5	15105471	15105480	25956115	2.6068e+07	NONE	AT5TE54610:transposable_element;	-45.3526	-59.3541	hypo	hypo
Chr2	18317765	18319872	2.72717e+07	27348995	AT2G44350:CDS;	AT2G44350:CDS;	-47.3954	-58.894	hypo	hypo
Chr1	6066037	6067924	2.15347e+07	2.17628e+07	AT1G17630:CDS;AT1G17640:CDS;	AT1G17630:CDS;AT1G17640:CDS;	-41.5452	-57.903	hypo	hypo
Chr1	4074096	4075434	20564190	2.08178e+07	AT1G12050:CDS;	AT1G12050:CDS;	-36.1164	-57.7332	hypo	hypo
Chr3	3927248	3928544	2.04564e+07	2.07128e+07	AT3G12340:CDS;	AT3G12340:CDS;	-30.4179	-57.4298	hypo	hypo
Chr2	995331	995929	1.89682e+07	19263764	AT2G03270:CDS;	AT2G03270:CDS;	-52.5171	-57.3977	hypo	hypo
Chr3	2577606	2579798	1.98956e+07	2.01668e+07	AT3G08500:five_prime_UTR;	AT3G08500:five_prime_UTR;	-45.3292	-55.1642	hypo	hypo
Chr5	483969	484791	1.87094e+07	1.90118e+07	AT5G02320:CDS;	AT5G02320:CDS;	-55.2993	-55.0693	hypo	hypo
Chr2	12096677	12098649	2.48562e+07	2.49969e+07	AT2G28320:CDS;	AT2G28320:CDS;	-46.7978	-54.6778	hypo	hypo
Chr1	27029932	27030340	2.96873e+07	2.97011e+07	AT1G71865:five_prime_UTR;	AT1G71865:three_prime_UTR,five_prime_UTR;AT1G71866:three_prime_UTR,five_prime_UTR;AT1G71870:CDS;	-52.0914	-54.3912	hypo	hypo
Chr2	18453254	18453375	2.73149e+07	2.7391e+07	AT2G44760:CDS;	AT2G44760:CDS;	-42.5559	-54.0066	hypo	hypo
Chr2	12213011	12214438	2.4964e+07	2.51019e+07	AT2G28520:CDS;	AT2G28520:CDS;	-42.9904	-53.9566	hypo	hypo
Chr2	11603706	11606070	2.46189e+07	2.47659e+07	AT2G27150:CDS;	AT2G27150:CDS;	-37.0358	-53.6265	hypo	hypo
Chr4	12021640	12022553	2.4813e+07	2.49549e+07	AT4G22940:CDS;	AT4G22930:three_prime_UTR;AT4G22940:CDS;	-45.2704	-53.3329	hypo	hypo
Chr2	19320228	19320770	27681531	2.7748e+07	AT2G47015:miRNA;AT2G47020:three_prime_UTR;	AT2G47015:miRNA;AT2G47020:three_prime_UTR;	-52.33	-52.5701	hypo	hypo
Chr3	5364951	5367306	2.11465e+07	2.13848e+07	AT3G15880:CDS;	AT3G15880:CDS;	-34.1993	-52.5391	hypo	hypo
Chr3	19933275	19933617	2.79188e+07	27979013	AT3G53810:CDS;	AT3G53800:three_prime_UTR;AT3G53810:three_prime_UTR;	-52.1596	-52.4205	hypo	hypo
Chr4	6180285	6180341	2.15994e+07	2.18258e+07	NONE	NONE	-44.1593	-52.3851	hypo	hypo
Chr4	8114280	8115761	2.24837e+07	2.26869e+07	AT4G14070:CDS;	AT4G14070:CDS;	-45.0246	-51.9352	hypo	hypo
Chr1	10388145	10390062	24015022	2.41779e+07	AT1G29710:CDS;AT1G29715:pseudogene;	AT1G29710:CDS;AT1G29715:pseudogene;	-38.5064	-51.9284	hypo	hypo
Chr4	16221034	16221044	2.63012e+07	26403968	AT4G33830:CDS;	AT4G33830:CDS;	-38.798	-51.7454	hypo	hypo
Chr1	4149652	4150284	2.06289e+07	2.08808e+07	AT1G12230:CDS;	AT1G12230:CDS;	-47.7623	-51.7237	hypo	hypo
Chr1	27077552	27077592	2.97089e+07	2.97221e+07	AT1G71930:CDS;	AT1G71930:CDS;	-36.3584	-51.2563	hypo	hypo
Chr3	2741367	2744327	1.99603e+07	2.02298e+07	AT3G08980:three_prime_UTR;AT3G08990:five_prime_UTR;	AT3G08980:three_prime_UTR;AT3G08990:five_prime_UTR;	-39.9975	-51.1963	hypo	hypo
Chr2	426742	426873	18623097	1.89278e+07	AT2G01920:CDS;	AT2G01920:CDS;	-38.7354	-50.9626	hypo	hypo
Chr3	8440945	8441877	2.26563e+07	2.28549e+07	AT3G23530:CDS;	AT3G23530:CDS;	-49.1531	-50.869	hypo	hypo
Chr5	25639928	25642499	2.93854e+07	2.94071e+07	AT5G64070:CDS;	AT5G64070:CDS;	-40.2133	-50.0916	hypo	hypo
Chr5	7207618	7214012	2.20092e+07	2.22248e+07	AT5G21170:three_prime_UTR;AT5G21222:three_prime_UTR,five_prime_UTR;AT5TE26080:transposable_element;	AT5G21170:CDS;	-36.9531	-49.8808	hypo	hypo
Chr5	14089423	14089879	2.5611e+07	2.57319e+07	AT5G35935:transposable_element_gene;	AT5G35935:transposable_element_gene;	-37.0539	-49.8134	hypo	hypo
Chr2	1377628	1377656	1.91839e+07	19473770	AT2G04100:CDS;	AT2G04100:CDS;	-39.8815	-49.762	hypo	hypo
Chr1	8020015	8022716	2.24406e+07	2.26449e+07	AT1G22660:three_prime_UTR;AT1G22670:CDS;	AT1G22670:CDS;	-48.211	-49.7073	hypo	hypo
Chr2	7947162	7947707	2.23974e+07	2.26029e+07	AT2G18280:CDS;	AT2G18280:CDS;	-52.815	-49.5806	hypo	hypo
Chr1	4256187	4257957	2.07367e+07	2.09858e+07	AT1G12470:three_prime_UTR;AT1G12480:three_prime_UTR;	AT1G12470:three_prime_UTR;AT1G12480:three_prime_UTR;	-22.462	-49.2794	hypo	hypo
Chr2	10848496	10848982	2.43817e+07	2.45349e+07	AT2G25490:CDS;	AT2G25490:CDS;	-43.595	-48.9503	hypo	hypo
Chr5	25149937	25151321	2.92128e+07	29239049	AT5G62640:CDS;	AT5G62640:CDS;	-42.3775	-48.7448	hypo	hypo
Chr3	9032696	9033075	2.31092e+07	2.32959e+07	AT3G24740:CDS;	AT3G24740:three_prime_UTR;AT3G24750:five_prime_UTR;AT3TE37760:transposable_element;	-47.6182	-48.5282	hypo	hypo
Chr1	5253295	5254002	2.10818e+07	2.13218e+07	AT1G15280:CDS;	AT1G15280:CDS;	-40.6089	-48.4538	hypo	hypo
Chr4	15371123	15373401	2.59777e+07	26088959	AT4G31770:five_prime_UTR;	AT4G31770:CDS;	-27.219	-48.246	hypo	hypo
Chr3	10249655	10252320	2.39072e+07	2.40729e+07	AT3G27670:CDS;	AT3G27670:CDS;	-33.1282	-48.1324	hypo	hypo
Chr1	815405	816483	18838774	1.91378e+07	AT1G03310:CDS;	AT1G03310:CDS;	-51.6348	-47.6663	hypo	hypo
Chr2	7286456	7286675	2.21171e+07	2.23299e+07	AT2G16800:CDS;	AT2G16800:CDS;	-41.7275	-47.5615	hypo	hypo
Chr5	181272	184346	18407420	1.87177e+07	AT5G01440:three_prime_UTR;AT5G01445:three_prime_UTR,five_prime_UTR;AT5G01450:three_prime_UTR;	AT5G01450:CDS;	-46.779	-47.4816	hypo	hypo
Chr2	5868011	5868630	21426898	2.16578e+07	NONE	NONE	-44.8662	-47.3889	hypo	hypo
Chr1	4183524	4185294	2.0672e+07	2.09228e+07	AT1G12300:three_prime_UTR;	AT1G12300:three_prime_UTR;	-39.1784	-47.3679	hypo	hypo
Chr1	2978282	2980818	2.01113e+07	2.03768e+07	AT1G09220:CDS;AT1G09230:three_prime_UTR;	AT1G09220:CDS;	-47.7891	-47.2359	hypo	hypo
Chr3	23029736	23029752	2.88031e+07	2.884e+07	AT3G62220:CDS;	AT3G62220:CDS;	-44.5561	-47.2199	hypo	hypo
Chr3	21486317	21486551	2.83933e+07	2.8441e+07	AT3G58030:CDS;	AT3G58030:CDS;	-37.2968	-47.1288	hypo	hypo
Chr3	553494	554299	1.87741e+07	1.90748e+07	AT3G02600:CDS;	AT3G02600:CDS;	-42.331	-47.0769	hypo	hypo
Chr2	11612756	11615419	2.46405e+07	2.47869e+07	AT2G27170:CDS;	AT2G27170:CDS;	-37.9461	-47.0472	hypo	hypo
Chr1	7001489	7001655	21858252	2.20778e+07	AT1G20200:CDS;	AT1G20200:CDS;	-36.4729	-46.7432	hypo	hypo
Chr4	429610	430672	1.86447e+07	18948755	AT4G00990:CDS;	AT4G00990:three_prime_UTR;AT4G01000:three_prime_UTR;	-46.1307	-46.6752	hypo	hypo
Chr5	20987538	20989157	2.82639e+07	2.8315e+07	AT5G51660:CDS;	AT5G51660:CDS;	-39.2247	-46.5859	hypo	hypo
Chr1	7204121	7205920	2.19877e+07	22203848	AT1G20750:CDS;	AT1G20750:CDS;	-26.7419	-46.5713	hypo	hypo
Chr1	25141769	25143792	29191270	2.9218e+07	AT1G67210:three_prime_UTR;	AT1G67210:three_prime_UTR;AT1G67220:CDS;AT1TE82550:transposable_element;	-40.8238	-46.5642	hypo	hypo
Chr4	10503950	10507097	2.41876e+07	2.43459e+07	AT4G19210:three_prime_UTR;AT4G19220:CDS;	AT4G19210:three_prime_UTR;AT4G19220:CDS;	-41.2845	-46.5505	hypo	hypo
Chr5	7769932	7770179	2.23327e+07	2.25399e+07	AT5G23110:CDS;	AT5G23110:CDS;	-38.9278	-46.4851	hypo	hypo
Chr3	2536670	2537515	1.9874e+07	2.01458e+07	AT3G07960:CDS;	AT3G07960:CDS;	-43.722	-46.2596	hypo	hypo
Chr3	17892562	17894960	27034500	2.7118e+07	AT3G48275:tRNA;AT3G48320:three_prime_UTR;AT3G48330:three_prime_UTR;	AT3G48275:tRNA;AT3G48320:three_prime_UTR;AT3G48330:three_prime_UTR;	-47.3814	-46.1182	hypo	hypo
Chr1	19997353	19999870	2.79619e+07	2.8021e+07	AT1G53590:CDS;	AT1G53590:CDS;	-40.4735	-46.0884	hypo	hypo
Chr5	1634280	1634675	19270128	1.95578e+07	AT5G05520:CDS;	AT5G05520:CDS;	-28.486	-46.0039	hypo	hypo
Chr1	25460117	25460207	2.93207e+07	29344052	AT1G67890:CDS;	AT1G67890:CDS;	-36.6763	-45.7565	hypo	hypo
Chr5	25696832	25697777	2.94285e+07	29449055	AT5G64240:three_prime_UTR;AT5G64250:three_prime_UTR;	AT5G64240:three_prime_UTR;AT5G64250:three_prime_UTR;	-42.7218	-45.7243	hypo	hypo
Chr5	19970731	19970749	2.79403e+07	2.8e+07	NONE	AT5TE71890:transposable_element;AT5TE71895:transposable_element;AT5TE71900:transposable_element;	-42.8013	-45.719	hypo	hypo
Chr3	15889484	15890965	2.61287e+07	2.6236e+07	AT3G44160:CDS;	AT3G44160:CDS;	-46.8941	-45.5501	hypo	hypo
Chr3	19650913	19651284	2.78541e+07	2.7916e+07	AT3G52990:CDS;	AT3G52990:CDS;	-44.2209	-45.5482	hypo	hypo
Chr3	4489202	4491266	2.0823e+07	2.10698e+07	AT3G13690:three_prime_UTR;AT3G13700:three_prime_UTR;AT3G13710:three_prime_UTR;	AT3G13690:three_prime_UTR;AT3G13700:three_prime_UTR;AT3G13710:three_prime_UTR;	-38.5975	-45.4952	hypo	hypo
Chr1	1780648	1781245	1.93564e+07	1.96418e+07	AT1G05890:CDS;	AT1G05890:three_prime_UTR;AT1G05894:five_prime_UTR;	-48.0661	-45.4812	hypo	hypo
Chr1	25835338	25836544	2.94501e+07	2.94701e+07	AT1G68790:CDS;	AT1G68790:CDS;	-37.5402	-45.3597	hypo	hypo
Chr4	10318706	10318943	2.39719e+07	2.41359e+07	AT4G18790:CDS;	AT4G18790:CDS;AT4G18800:three_prime_UTR;	-43.1374	-45.2888	hypo	hypo
Chr4	146888	147190	1.83211e+07	18633746	AT4G00335:CDS;	AT4G00335:five_prime_UTR;	-55.179	-44.9896	hypo	hypo
Chr2	4143724	4143953	2.06073e+07	2.08598e+07	NONE	NONE	-42.0207	-44.9872	hypo	hypo
Chr5	2331557	2331631	1.96799e+07	1.99568e+07	AT5G07370:CDS;	AT5G07370:CDS;	-25.0657	-44.9504	hypo	hypo
Chr5	7743438	7745453	2.23112e+07	22518857	AT5G23080:CDS;	AT5G23080:CDS;	-31.9992	-44.9313	hypo	hypo
Chr2	14569766	14569794	2.5762e+07	25878953	AT2G34590:CDS;	AT2G34590:CDS;	-32.3285	-44.8961	hypo	hypo
Chr3	20626145	20626150	2.8156e+07	2.821e+07	AT3G55610:CDS;	AT3G55610:CDS;	-48.1185	-44.8166	hypo	hypo
Chr4	6086034	6086549	2.15779e+07	2.18048e+07	AT4G09630:CDS;	AT4G09630:CDS;	-49.2389	-44.6941	hypo	hypo
Chr3	16206680	16206982	2.62581e+07	2.6362e+07	NONE	NONE	-46.6448	-44.6146	hypo	hypo
Chr2	11694504	11695661	24662053	2.48079e+07	AT2G27320:three_prime_UTR;AT2G27330:three_prime_UTR;	AT2G27320:three_prime_UTR;AT2G27330:three_prime_UTR;	-51.2407	-44.4815	hypo	hypo
Chr1	30076857	30080233	30072534	30080159	AT1G79950:CDS;AT1G79960:CDS;	AT1G79940:three_prime_UTR;AT1G79950:CDS;AT1G79960:CDS;	-44.5395	-44.4128	hypo	hypo
Chr5	13523905	13524871	2.54169e+07	2.55429e+07	AT5G35330:CDS;	AT5G35320:three_prime_UTR;AT5G35330:three_prime_UTR;	-35.1397	-44.3455	hypo	hypo
Chr3	7380660	7380702	2.21818e+07	2.23929e+07	AT3G21070:CDS;	AT3G21060:three_prime_UTR;AT3G21070:three_prime_UTR;	-32.2254	-44.3408	hypo	hypo
Chr4	1277684	1277820	1.90976e+07	1.93898e+07	AT4G02880:CDS;	AT4G02880:CDS;	-46.7982	-44.2442	hypo	hypo
Chr2	7210625	7212409	2.20308e+07	2.22458e+07	AT2G16630:three_prime_UTR;AT2G16640:three_prime_UTR;	AT2G16630:three_prime_UTR;AT2G16640:three_prime_UTR;	-36.9156	-44.1949	hypo	hypo
Chr5	5551189	5551267	2.12759e+07	2.15108e+07	AT5G16880:three_prime_UTR;	AT5G16880:three_prime_UTR;	-27.7188	-44.1742	hypo	hypo
Chr2	9958194	9959866	2.37131e+07	23883896	AT2G23380:CDS;	AT2G23380:CDS;	-45.2097	-43.7952	hypo	hypo
Chr1	29534558	29536090	2.99461e+07	2.99531e+07	AT1G78500:CDS;AT1G78510:three_prime_UTR;	AT1G78500:CDS;AT1G78510:three_prime_UTR;	-30.2913	-43.7202	hypo	hypo
Chr1	20030128	20030161	2.79835e+07	2.8042e+07	AT1G53650:CDS;	AT1G53650:CDS;	-41.2702	-43.4193	hypo	hypo
Chr1	29725429	29729397	2.99893e+07	2.99951e+07	AT1G79010:five_prime_UTR;AT1G79020:three_prime_UTR;	AT1G79010:five_prime_UTR;AT1G79020:three_prime_UTR,five_prime_UTR;AT1G79030:three_prime_UTR;	-21.1345	-43.2302	hypo	hypo
Chr3	3844923	3846038	2.03701e+07	20628803	AT3G12060:CDS;AT3G12070:three_prime_UTR;	AT3G12060:CDS;AT3G12070:three_prime_UTR;	-42.0684	-43.2111	hypo	hypo
Chr3	5809518	5809526	2.13838e+07	2.16158e+07	AT3G17040:CDS;	AT3G17030:CDS;AT3G17040:three_prime_UTR;	-39.1735	-42.9978	hypo	hypo
Chr1	26629970	26633655	2.95579e+07	2.95751e+07	AT1G70620:three_prime_UTR;AT1G70630:five_prime_UTR;AT1TE87190:transposable_element;	AT1G70630:CDS;	-40.9096	-42.9549	hypo	hypo
Chr2	18264815	18265778	2.72286e+07	2.7307e+07	AT2G44160:three_prime_UTR;AT2G44170:pseudogene;	AT2G44160:CDS;	-26.9289	-42.7919	hypo	hypo
Chr5	18844791	18846537	2.74874e+07	27559001	AT5G46470:CDS;	AT5G46470:CDS;	-48.7301	-42.766	hypo	hypo
Chr1	8467150	8470785	2.26778e+07	2.28759e+07	AT1G23940:CDS;AT1G23950:three_prime_UTR;	AT1G23950:three_prime_UTR;	-40.0314	-42.5953	hypo	hypo
Chr5	7625539	7626393	2.2268e+07	2.24769e+07	AT5G22820:CDS;	AT5G22820:CDS;	-20.835	-42.5579	hypo	hypo
Chr3	21673668	21673694	2.8458e+07	28504028	AT3G58610:CDS;	AT3G58610:CDS;	-44.1518	-42.536	hypo	hypo
Chr2	16344921	16344951	2.63659e+07	2.6467e+07	AT2G39180:CDS;AT2TE73320:transposable_element;	AT2G39180:CDS;AT2TE73320:transposable_element;	-41.8407	-42.4272	hypo	hypo
Chr5	1845728	1848161	1.94211e+07	1.97048e+07	AT5G06120:CDS;	AT5G06120:CDS;	-36.217	-42.2561	hypo	hypo
Chr1	3683179	3683701	2.02838e+07	2.05448e+07	AT1G11050:CDS;	AT1G11050:CDS;	-21.5827	-42.2527	hypo	hypo
Chr5	19571860	19571976	2.78325e+07	2.7895e+07	AT5G48300:CDS;	AT5G48300:CDS;	-32.9729	-42.2469	hypo	hypo
Chr5	18055763	18058054	2.70776e+07	2.716e+07	AT5G44750:CDS;	AT5G44750:CDS;	-31.6932	-41.6228	hypo	hypo
Chr3	16437189	16437432	26387469	2.6488e+07	AT3TE66625:transposable_element;	AT3TE66625:transposable_element;	-38.5962	-41.5987	hypo	hypo
Chr4	14353100	14353401	2.57189e+07	2.5837e+07	AT4G29130:CDS;	AT4G29130:CDS;	-49.0874	-41.4117	hypo	hypo
Chr5	22398922	22399928	2.86521e+07	2.8693e+07	AT5G55220:CDS;	AT5G55220:CDS;	-39.1937	-41.3954	hypo	hypo
Chr1	3601157	3603040	2.02407e+07	2.05028e+07	AT1G10820:three_prime_UTR;	AT1G10820:three_prime_UTR;	-45.7891	-41.384	hypo	hypo
Chr4	9677283	9679181	2.34758e+07	2.36529e+07	AT4G17270:three_prime_UTR;AT4G17280:three_prime_UTR;	AT4G17270:three_prime_UTR;AT4G17280:three_prime_UTR;	-39.6361	-41.3552	hypo	hypo
Chr2	17423736	17426048	26818823	2.6908e+07	AT2G41760:three_prime_UTR;AT2G41770:three_prime_UTR;	AT2G41770:CDS;	-29.2107	-41.275	hypo	hypo
Chr5	7157324	7158201	2.19661e+07	2.21828e+07	AT5G21070:three_prime_UTR;AT5G21080:CDS;	AT5G21070:three_prime_UTR;AT5G21080:CDS;	-41.5524	-41.2196	hypo	hypo
Chr5	21203005	21203642	2.8307e+07	2.8357e+07	AT5G52200:CDS;	AT5G52170:CDS;AT5G52180:three_prime_UTR,five_prime_UTR;AT5G52190:three_prime_UTR,five_prime_UTR;AT5G52200:three_prime_UTR;	-40.5144	-41.0304	hypo	hypo
Chr4	7072735	7074062	2.19014e+07	2.21198e+07	AT4G11740:CDS;	AT4G11740:CDS;	-33.1833	-40.9525	hypo	hypo
Chr3	4599837	4599855	2.08661e+07	2.11118e+07	AT3G13930:mRNA;	AT3G13930:CDS;	-37.269	-40.9475	hypo	hypo
Chr5	8290560	8290614	2.25484e+07	2.27499e+07	NONE	NONE	-36.8376	-40.9064	hypo	hypo
Chr1	11263157	11268249	2.44679e+07	24618917	AT1G31460:five_prime_UTR;AT1G31470:five_prime_UTR;AT1G31480:five_prime_UTR;	AT1G31460:five_prime_UTR;AT1G31470:CDS;	-22.4146	-40.8962	hypo	hypo
Chr4	2477827	2479212	1.98093e+07	2.00828e+07	AT4G04890:CDS;	AT4G04890:CDS;	-45.8457	-40.8457	hypo	hypo
Chr3	12576282	12578408	2.50503e+07	2.51859e+07	AT3G30839:transposable_element_gene;AT3TE51795:transposable_element;AT3TE51800:transposable_element;	AT3G30839:transposable_element_gene;AT3TE51795:transposable_element;AT3TE51800:transposable_element;	-34.6837	-40.8022	hypo	hypo
Chr5	24182960	24183425	2.90187e+07	2.905e+07	AT5G60040:three_prime_UTR;	AT5G60040:three_prime_UTR;AT5G60050:three_prime_UTR;	-30.3947	-40.6815	hypo	hypo
Chr1	26198210	26198296	2.94932e+07	2.95121e+07	AT1G69650:CDS;	AT1G69650:CDS;	-36.1235	-40.617	hypo	hypo
Chr3	1244254	1244992	19054451	1.93478e+07	AT3G04600:CDS;	AT3G04600:CDS;	-20.1257	-40.4634	hypo	hypo
Chr1	28371795	28371805	2.98167e+07	2.98271e+07	AT1G75560:CDS;	AT1G75560:CDS;	-44.8584	-40.3693	hypo	hypo
Chr2	11311844	11313543	2.45111e+07	2.46609e+07	AT2G26590:CDS;	AT2G26590:CDS;	-23.2808	-40.2837	hypo	hypo
Chr1	9941475	9944981	2.36915e+07	2.38629e+07	AT1G28340:three_prime_UTR;AT1G28350:five_prime_UTR;	AT1G28340:three_prime_UTR;AT1G28350:five_prime_UTR;	-37.8571	-40.2321	hypo	hypo
Chr1	14025792	14026729	2.55463e+07	25668947	AT1G36980:three_prime_UTR;	AT1G36980:three_prime_UTR;AT1G36990:three_prime_UTR;AT1TE46075:transposable_element;	-45.8525	-40.1673	hypo	hypo
Chr5	16875905	16876831	2.65384e+07	2.6635e+07	AT5G42220:CDS;	AT5G42220:CDS;	-30.2685	-40.0441	hypo	hypo
Chr1	23758783	23759265	2.8954e+07	2.8987e+07	AT1G64040:CDS;	AT1G64040:CDS;	-51.7318	-39.9728	hypo	hypo
Chr5	21091413	21091784	2.82854e+07	2.8336e+07	AT5G51890:CDS;	AT5G51880:three_prime_UTR;AT5G51890:three_prime_UTR;	-34.5261	-39.938	hypo	hypo
Chr5	7262629	7262957	22073929	2.22879e+07	AT5G21970:CDS;	AT5G21970:CDS;	-40.9622	-39.7061	hypo	hypo
Chr5	548727	549538	1.87525e+07	19053758	AT5G02480:CDS;	AT5G02480:CDS;	-41.6578	-39.6928	hypo	hypo
Chr4	12293676	12293681	2.49856e+07	2.51229e+07	AT4G23560:CDS;	AT4G23560:CDS;	-30.489	-39.6541	hypo	hypo
Chr4	9767197	9767205	2.35405e+07	2.37159e+07	AT4G17510:CDS;	AT4G17510:CDS;	-54.4377	-39.6239	hypo	hypo
Chr2	12063823	12072021	2.48346e+07	2.49759e+07	AT2G28290:CDS;	AT2G28290:CDS;	-33.1733	-39.5635	hypo	hypo
Chr5	25347356	25348114	2.92775e+07	2.93021e+07	AT5G63190:CDS;AT5G63195:ncRNA;	AT5G63190:CDS;AT5G63195:ncRNA;	-27.2847	-39.4931	hypo	hypo
Chr3	22543094	22548746	2.86952e+07	2.8735e+07	AT3G60961:mRNA;AT3G60965:transposable_element_gene;AT3TE91845:transposable_element;AT3TE91850:transposable_element;AT3TE91855:transposable_element;AT3TE91865:transposable_element;AT3TE91870:transposable_element;	AT3G60961:mRNA;AT3G60965:transposable_element_gene;AT3TE91870:transposable_element;	-36.6138	-39.3485	hypo	hypo
Chr3	19199279	19203005	2.76384e+07	2.7706e+07	AT3G51760:five_prime_UTR;AT3G51770:three_prime_UTR;	AT3G51760:five_prime_UTR;AT3G51770:three_prime_UTR;	-23.9207	-39.2383	hypo	hypo
Chr1	11459024	11460100	2.45973e+07	2.47449e+07	AT1G31910:five_prime_UTR;	AT1G31910:three_prime_UTR,five_prime_UTR;AT1G31920:three_prime_UTR;	-43.3503	-39.1289	hypo	hypo
Chr3	7320594	7321139	2.21386e+07	2.23509e+07	AT3G20890:CDS;	AT3G20890:CDS;	-40.7659	-39.1062	hypo	hypo
Chr5	10021105	10022942	2.37778e+07	2.39469e+07	AT5G28000:CDS;	AT5G28000:CDS;AT5G28010:CDS;AT5TE36490:transposable_element;	-34.7777	-39.0822	hypo	hypo
Chr2	16738058	16739292	2.64953e+07	2.6593e+07	AT2G40090:CDS;	AT2G40090:CDS;	-57.2311	-38.962	hypo	hypo
Chr2	12133265	12134295	2.49209e+07	2.50599e+07	AT2G28370:three_prime_UTR;AT2G28380:three_prime_UTR;	AT2G28370:three_prime_UTR;AT2G28380:three_prime_UTR;	-23.5026	-38.9184	hypo	hypo
Chr3	136160	136611	1.82996e+07	1.86127e+07	AT3G01350:CDS;AT3G01360:three_prime_UTR;	AT3G01350:CDS;AT3G01360:three_prime_UTR;	-34.179	-38.7037	hypo	hypo
Chr1	9288710	9288891	2.33249e+07	2.35059e+07	AT1G26810:CDS;	AT1G26810:CDS;	-40.5871	-38.6299	hypo	hypo
Chr4	2335684	2335709	19701482	1.99778e+07	NONE	NONE	-43.635	-38.6232	hypo	hypo
Chr1	3915809	3917593	2.04348e+07	2.06918e+07	AT1G11650:three_prime_UTR;	AT1G11650:mRNA;	-40.4382	-38.5973	hypo	hypo
Chr5	4294930	4298603	2.07583e+07	2.10068e+07	AT5G13390:three_prime_UTR;AT5G13400:three_prime_UTR;	AT5G13390:three_prime_UTR;AT5G13400:three_prime_UTR;	-27.232	-38.5264	hypo	hypo
Chr3	8588241	8588406	2.27425e+07	22938869	AT3G23810:CDS;	AT3G23810:CDS;	-40.1239	-38.5209	hypo	hypo
Chr1	11846989	11850592	2.47483e+07	2.48919e+07	AT1G32750:CDS;	AT1G32750:CDS;	-28.6863	-38.4803	hypo	hypo
Chr3	21687376	21688482	2.84795e+07	2.8525e+07	AT3G58640:CDS;	AT3G58640:five_prime_UTR;	-47.4255	-38.4215	hypo	hypo
Chr3	19362331	19365891	2.77247e+07	2.779e+07	AT3G52200:CDS;	AT3G52200:CDS;	-29.8553	-38.4154	hypo	hypo
Chr1	10807481	10808287	2.42954e+07	2.44509e+07	AT1G30510:CDS;	AT1G30510:five_prime_UTR;	-32.448	-38.3979	hypo	hypo
Chr1	10351628	10352651	2.39935e+07	2.41569e+07	AT1G29630:CDS;	AT1G29630:CDS;	-45.0245	-38.1984	hypo	hypo
Chr2	19116041	19124257	2.76168e+07	2.7685e+07	AT2G46560:CDS;	AT2G46560:CDS;	-20.2623	-37.9091	hypo	hypo
Chr1	11732964	11733049	2.46836e+07	24828923	AT1TE38020:transposable_element;	AT1TE38020:transposable_element;AT1TE38025:transposable_element;AT1TE38030:transposable_element;	-38.4929	-37.9038	hypo	hypo
Chr5	15057104	15058248	2.58914e+07	2.6005e+07	AT5G37830:CDS;	AT5G37830:CDS;	-40.0368	-37.8831	hypo	hypo
Chr2	169412	171079	1.83643e+07	1.86757e+07	AT2G01370:five_prime_UTR;AT2G01372:pseudogene;	AT2G01370:five_prime_UTR;AT2G01372:pseudogene;	-32.5903	-37.86	hypo	hypo
Chr4	6602585	6603543	2.1772e+07	21993842	AT4G10710:CDS;	AT4G10710:CDS;	-25.0427	-37.6722	hypo	hypo
Chr3	3407983	3408528	2.02191e+07	2.04818e+07	AT3G10890:CDS;	AT3G10890:CDS;	-31.4878	-37.6026	hypo	hypo
Chr3	9825496	9826516	23583668	2.37579e+07	AT3G26730:CDS;	AT3G26730:CDS;	-47.2841	-37.585	hypo	hypo
Chr1	8131427	8131528	22505283	2.27079e+07	AT1G22970:CDS;	AT1G22960:CDS;AT1G22970:three_prime_UTR;	-44.4539	-37.5733	hypo	hypo
Chr3	2466642	2471415	1.97878e+07	2.00618e+07	AT3G07720:three_prime_UTR;AT3G07730:CDS;AT3G07740:three_prime_UTR;	AT3G07720:three_prime_UTR;AT3G07730:CDS;AT3G07740:three_prime_UTR;	-29.8785	-37.5041	hypo	hypo
Chr3	18581169	18582905	2.73364e+07	2.7412e+07	AT3G50110:CDS;	AT3G50100:CDS;AT3G50110:five_prime_UTR,three_prime_UTR;AT3G50120:three_prime_UTR;AT3TE75400:transposable_element;AT3TE75405:transposable_element;	-42.3917	-37.3576	hypo	hypo
Chr2	11061526	11062942	2.44032e+07	2.45559e+07	AT2G25930:CDS;	AT2G25930:CDS;	-34.2996	-37.3482	hypo	hypo
Chr3	21509523	21509738	2.84148e+07	2.8462e+07	NONE	NONE	-43.0115	-37.3241	hypo	hypo
Chr1	28524876	28524881	29838301	2.98481e+07	AT1G75990:CDS;	AT1G75990:CDS;	-33.3919	-37.3042	hypo	hypo
Chr5	22663818	22664695	2.87168e+07	2.8756e+07	AT5G55960:CDS;	AT5G55960:CDS;	-20.409	-37.1149	hypo	hypo
Chr3	17660588	17660849	2.69267e+07	2.7013e+07	AT3G47870:CDS;	AT3G47870:five_prime_UTR;AT3TE71535:transposable_element;AT3TE71540:transposable_element;	-36.4861	-36.9689	hypo	hypo
Chr5	1245322	1246921	1.9076e+07	19368767	AT5G04410:three_prime_UTR;AT5G04420:three_prime_UTR;	AT5G04410:CDS;	-33.1622	-36.9148	hypo	hypo
Chr1	6646982	6649660	2.17935e+07	2.20148e+07	AT1G19230:three_prime_UTR;AT1G19240:three_prime_UTR;	AT1G19230:three_prime_UTR;AT1G19240:three_prime_UTR;	-40.3054	-36.905	hypo	hypo
Chr1	29033091	29033591	2.98599e+07	29869067	AT1G77280:CDS;	AT1G77270:three_prime_UTR;AT1G77280:CDS;	-49.949	-36.852	hypo	hypo
Chr4	2761222	2766234	2.00034e+07	2.02718e+07	AT4G05460:five_prime_UTR;AT4G05470:CDS;AT4G05475:CDS;AT4TE12900:transposable_element;	AT4G05450:three_prime_UTR;AT4G05460:three_prime_UTR;	-40.2198	-36.668	hypo	hypo
Chr2	248656	249081	1.84721e+07	1.87808e+07	AT2G01550:transposable_element_gene;AT2TE01000:transposable_element;	AT2G01550:transposable_element_gene;AT2G01554:CDS;AT2G01560:three_prime_UTR;AT2TE01000:transposable_element;	-41.6124	-36.558	hypo	hypo
Chr1	29666763	29669633	2.99677e+07	29974070	AT1G78910:three_prime_UTR;AT1G78915:three_prime_UTR;	AT1G78910:CDS;	-25.7975	-36.4918	hypo	hypo
Chr4	1333466	1333804	1.91407e+07	1.94318e+07	AT4G03020:CDS;	AT4G03020:CDS;	-54.1593	-36.2444	hypo	hypo
Chr3	9293788	9296976	2.33464e+07	2.35269e+07	AT3G25580:three_prime_UTR;AT3G25585:five_prime_UTR;	AT3G25585:five_prime_UTR;	-25.1392	-36.2218	hypo	hypo
Chr5	25404815	25405279	2.92991e+07	2.93231e+07	AT5G63420:CDS;	AT5G63420:CDS;	-36.5722	-36.0271	hypo	hypo
Chr2	1698873	1699464	1.93133e+07	1.95998e+07	AT2G04842:CDS;	AT2G04840:CDS;AT2G04842:CDS;	-47.4575	-35.9321	hypo	hypo
Chr1	8896071	8896607	2.29798e+07	2.31699e+07	AT1G25360:CDS;	AT1G25360:CDS;	-32.5957	-35.8253	hypo	hypo
Chr5	4308545	4308748	20779867	2.10278e+07	AT5G13440:CDS;	AT5G13440:CDS;	-47.2392	-35.7383	hypo	hypo
Chr3	1401968	1404962	1.9227e+07	1.95158e+07	AT3G05040:CDS;	AT3G05040:CDS;	-35.3175	-35.6995	hypo	hypo
Chr3	9705137	9705674	2.34974e+07	23673890	AT3G26490:CDS;	AT3G26490:CDS;	-42.9257	-35.6991	hypo	hypo
Chr2	9856528	9856808	2.36268e+07	2.37999e+07	AT2G23150:CDS;	AT2G23150:CDS;	-40.3539	-35.6647	hypo	hypo
Chr3	504340	507479	1.87309e+07	1.90328e+07	AT3G02450:five_prime_UTR;AT3G02460:five_prime_UTR;	AT3G02450:five_prime_UTR;AT3G02460:five_prime_UTR;	-54.4464	-35.5979	hypo	hypo
Chr2	1945388	1945510	19485805	1.97678e+07	NONE	NONE	-36.9578	-35.5412	hypo	hypo
Chr3	10296999	10297114	2.39503e+07	2.41149e+07	AT3TE42795:transposable_element;	AT3TE42795:transposable_element;AT3TE42800:transposable_element;	-32.8227	-35.3859	hypo	hypo
Chr3	20853980	20854013	2.82423e+07	28294022	AT3G56210:three_prime_UTR;	AT3G56210:three_prime_UTR;	-38.3407	-35.3253	hypo	hypo
Chr3	20098165	20100104	2.80266e+07	28084016	AT3G54280:CDS;	AT3G54280:CDS;	-38.9592	-35.3104	hypo	hypo
Chr2	15384044	15385414	2.59993e+07	2.611e+07	AT2G36700:CDS;	AT2G36700:CDS;	-44.8984	-35.2532	hypo	hypo
Chr3	6368221	6371213	2.16857e+07	2.19098e+07	AT3G18524:CDS;	AT3G18520:three_prime_UTR;AT3G18524:three_prime_UTR;AT3TE26780:transposable_element;AT3TE26785:transposable_element;AT3TE26790:transposable_element;	-36.0217	-35.1523	hypo	hypo
Chr3	6362232	6365050	2.16641e+07	21888839	AT3G18520:CDS;	AT3G18520:three_prime_UTR;AT3G18524:three_prime_UTR;AT3TE26780:transposable_element;AT3TE26785:transposable_element;AT3TE26790:transposable_element;	-40.5577	-35.1523	hypo	hypo
Chr5	26639349	26639413	2.95795e+07	2.95961e+07	AT5G66720:mRNA;	AT5G66720:CDS;	-39.3136	-35.0971	hypo	hypo
Chr3	10206540	10208412	2.38856e+07	2.40519e+07	AT3G27540:three_prime_UTR;AT3G27550:three_prime_UTR;	AT3G27540:three_prime_UTR;AT3G27550:three_prime_UTR;AT3G27555:tRNA;AT3G27560:three_prime_UTR;	-48.2513	-34.9895	hypo	hypo
Chr1	24475796	24480217	2.90619e+07	2.9092e+07	AT1G65800:three_prime_UTR;AT1G65810:CDS;	AT1G65800:three_prime_UTR;AT1G65810:CDS;	-22.1053	-34.9545	hypo	hypo
Chr1	12842386	12847496	2.51797e+07	2.53119e+07	AT1G35115:transposable_element_gene;AT1G35120:transposable_element_gene;AT1TE41800:transposable_element;AT1TE41805:transposable_element;AT1TE41810:transposable_element;AT1TE41815:transposable_element;	AT1G35115:transposable_element_gene;AT1G35120:transposable_element_gene;AT1TE41800:transposable_element;AT1TE41805:transposable_element;AT1TE41810:transposable_element;AT1TE41815:transposable_element;	-36.3322	-34.8946	hypo	hypo
Chr5	19522820	19523248	2.77894e+07	2.7853e+07	AT5G48150:CDS;	AT5G48150:CDS;	-30.3218	-34.8168	hypo	hypo
Chr1	20840508	20844020	2.82207e+07	2.8273e+07	AT1G55750:CDS;	AT1G55750:CDS;	-22.016	-34.7001	hypo	hypo
Chr5	15924178	15925382	2.61502e+07	2.6257e+07	AT5G39770:CDS;AT5TE57495:transposable_element;AT5TE57500:transposable_element;	AT5G39770:CDS;AT5TE57495:transposable_element;AT5TE57500:transposable_element;	-25.7573	-34.5682	hypo	hypo
Chr5	13477482	13481239	2.53954e+07	2.55219e+07	AT5G35210:CDS;	AT5G35210:CDS;	-42.5968	-34.4382	hypo	hypo
Chr4	11826750	11826875	2.47268e+07	2.48709e+07	NONE	AT4G22430:CDS;AT4TE54720:transposable_element;	-36.0489	-34.3834	hypo	hypo
Chr1	24491286	24492601	2.90834e+07	2.9113e+07	AT1G65840:CDS;	AT1G65840:CDS;	-38.4385	-34.291	hypo	hypo
Chr3	175325	175826	1.83859e+07	1.86967e+07	AT3G01460:CDS;	AT3G01460:CDS;	-39.4505	-34.2556	hypo	hypo
Chr5	18831378	18832437	27465854	2.7538e+07	AT5G46420:CDS;	AT5G46420:CDS;	-23.2773	-34.1762	hypo	hypo
Chr1	10841518	10843162	2.43601e+07	24513914	AT1G30600:CDS;	AT1G30600:CDS;	-36.2607	-34.0735	hypo	hypo
Chr1	3792228	3795087	2.03054e+07	2.05658e+07	AT1G11290:CDS;AT1G11300:five_prime_UTR;	AT1G11290:CDS;AT1G11300:five_prime_UTR;	-34.2029	-34.0384	hypo	hypo
Chr4	1666520	1672541	1.92917e+07	19578773	AT4G03745:transposable_element_gene;AT4G03750:transposable_element_gene;AT4G03760:transposable_element_gene;AT4TE08435:transposable_element;AT4TE08440:transposable_element;AT4TE08445:transposable_element;	AT4G03745:transposable_element_gene;AT4G03750:transposable_element_gene;AT4TE08435:transposable_element;	-23.3361	-33.9922	hypo	hypo
Chr1	26820342	26821628	29622624	2.96381e+07	AT1G71110:three_prime_UTR;AT1G71120:CDS;	AT1G71110:three_prime_UTR;AT1G71120:CDS;	-45.2234	-33.7049	hypo	hypo
Chr2	17429593	17429623	2.68404e+07	26928983	AT2G41790:CDS;	AT2G41790:CDS;	-40.2668	-33.6916	hypo	hypo
Chr1	2777221	2778074	2.0025e+07	2.02928e+07	AT1G08720:CDS;	AT1G08720:CDS;	-27.1705	-33.6566	hypo	hypo
Chr1	18664202	18665720	2.7358e+07	2.7433e+07	AT1G50380:CDS;	AT1G50380:CDS;	-28.3355	-33.6431	hypo	hypo
Chr1	24527323	24528027	2.9105e+07	29134046	AT1G65920:CDS;	AT1G65920:CDS;	-21.7425	-33.4251	hypo	hypo
Chr2	7618948	7619203	2.22465e+07	2.24559e+07	AT2G17520:CDS;	AT2G17520:CDS;	-54.1418	-33.2079	hypo	hypo
Chr1	23548444	23548571	2.89109e+07	2.8945e+07	AT1G63490:mRNA;	AT1G63490:CDS;	-30.5376	-33.2009	hypo	hypo
Chr2	18063126	18066055	2.70992e+07	2.7181e+07	AT2G43500:CDS;	AT2G43500:CDS;	-22.0754	-33.1634	hypo	hypo
Chr1	7928598	7928789	2.23759e+07	2.25819e+07	AT1G22460:CDS;	AT1G22460:CDS;	-49.3853	-33.1617	hypo	hypo
Chr5	24742819	24743505	2.91481e+07	2.9176e+07	AT5G61530:CDS;	AT5G61530:three_prime_UTR;AT5G61540:five_prime_UTR;	-45.8572	-33.0379	hypo	hypo
Chr1	17554425	17554481	2.6862e+07	2.695e+07	NONE	NONE	-32.9444	-32.9571	hypo	hypo
Chr4	1366933	1367869	1.91623e+07	1.94528e+07	AT4G03090:CDS;	AT4G03090:CDS;	-28.0623	-32.949	hypo	hypo
Chr1	10084520	10089765	2.38209e+07	23988899	AT1G28700:five_prime_UTR;AT1G28710:three_prime_UTR,five_prime_UTR;AT1G28720:tRNA;AT1TE32530:transposable_element;	AT1G28700:five_prime_UTR;AT1G28710:three_prime_UTR;AT1TE32530:transposable_element;	-40.4483	-32.9267	hypo	hypo
Chr3	23063335	23063948	2.88246e+07	2.8861e+07	AT3G62330:CDS;	AT3G62330:three_prime_UTR;	-51.9734	-32.7289	hypo	hypo
Chr4	4197390	4198346	2.06936e+07	20943812	AT4G07390:three_prime_UTR;AT4G07400:CDS;	AT4G07390:three_prime_UTR;AT4G07400:CDS;	-34.1481	-32.7114	hypo	hypo
Chr1	25191979	25192133	2.92344e+07	2.926e+07	AT1G67290:CDS;	AT1G67290:CDS;	-32.3759	-32.6737	hypo	hypo
Chr4	16961786	16965867	26603146	2.6698e+07	AT4G35800:CDS;	AT4G35800:CDS;	-20.4749	-32.6095	hypo	hypo
Chr1	20769780	20770429	2.81776e+07	2.8231e+07	AT1G55590:CDS;	AT1G55590:CDS;	-36.1518	-32.5339	hypo	hypo
Chr5	20460482	20461415	2.81345e+07	28189019	AT5G50280:CDS;	AT5G50280:CDS;	-32.1334	-32.2336	hypo	hypo
Chr2	7860965	7861034	2.23543e+07	2.25609e+07	NONE	NONE	-30.5429	-32.2061	hypo	hypo
Chr1	5512943	5512971	2.12328e+07	21468827	AT1G16070:CDS;	AT1G16070:five_prime_UTR;AT1G16080:three_prime_UTR,five_prime_UTR;AT1G16090:CDS;	-30.6997	-32.0851	hypo	hypo
Chr1	1211852	1214098	1.90329e+07	1.93268e+07	AT1G04470:CDS;	AT1G04470:CDS;	-34.9763	-32.0284	hypo	hypo
Chr1	12595258	12595555	2.50718e+07	2.52069e+07	AT1G34460:CDS;	AT1G34460:CDS;	-34.9851	-31.8028	hypo	hypo
Chr3	23192505	23193457	2.88462e+07	2.8882e+07	AT3G62700:CDS;	AT3G62700:CDS;	-21.492	-31.5538	hypo	hypo
Chr1	16135285	16135349	2.62149e+07	2.632e+07	AT1G42980:CDS;	AT1G42980:three_prime_UTR;AT1G42990:three_prime_UTR;AT1TE53125:transposable_element;	-42.4675	-31.319	hypo	hypo
Chr2	15675441	15675712	2.6064e+07	2.6173e+07	AT2G37360:CDS;AT2G37362:ncRNA;	AT2G37360:CDS;AT2G37362:ncRNA;	-20.8994	-31.3047	hypo	hypo
Chr1	5476168	5477397	21211221	2.14478e+07	AT1G15940:CDS;	AT1G15940:CDS;	-24.1327	-31.2875	hypo	hypo
Chr3	15516838	15517011	2.60208e+07	2.6131e+07	AT3G43600:CDS;	AT3G43600:CDS;	-39.5956	-31.2511	hypo	hypo
Chr1	5769553	5771698	2.13622e+07	2.15948e+07	AT1G16858:three_prime_UTR;AT1G16860:three_prime_UTR;AT1G16870:three_prime_UTR;	AT1G16858:three_prime_UTR;AT1G16860:three_prime_UTR;AT1G16870:three_prime_UTR;	-43.1427	-31.2222	hypo	hypo
Chr5	9286921	9289311	2.33033e+07	2.34849e+07	AT5G26742:five_prime_UTR;AT5TE33590:transposable_element;AT5TE33595:transposable_element;	AT5G26742:three_prime_UTR,five_prime_UTR;AT5TE33590:transposable_element;AT5TE33595:transposable_element;	-38.0965	-31.206	hypo	hypo
Chr2	9153309	9156396	2.32386e+07	2.34219e+07	AT2G21390:CDS;	AT2G21390:CDS;	-41.173	-31.0973	hypo	hypo
Chr1	7998287	8001740	2.2419e+07	22623860	AT1G22620:CDS;	AT1G22620:CDS;	-48.5528	-31.0862	hypo	hypo
Chr1	5716222	5717186	2.13406e+07	21573830	AT1G16710:CDS;	AT1G16710:CDS;	-35.0083	-31.0116	hypo	hypo
Chr2	944258	947279	1.8925e+07	1.92218e+07	AT2G03140:CDS;	AT2G03140:three_prime_UTR;	-24.4816	-31.0032	hypo	hypo
Chr3	2977184	2978117	2.00897e+07	2.03558e+07	AT3G09710:CDS;	AT3G09710:CDS;	-35.5447	-30.902	hypo	hypo
Chr4	754313	754647	1.87956e+07	1.90958e+07	AT4G01740:CDS;	AT4G01740:CDS;	-31.0655	-30.7821	hypo	hypo
Chr2	17383818	17384431	2.67757e+07	2.6866e+07	AT2G41700:CDS;	AT2G41700:CDS;	-42.0029	-30.7581	hypo	hypo
Chr4	27537	28024	1.82564e+07	1.85707e+07	AT4G00060:three_prime_UTR;	AT4G00060:three_prime_UTR;	-30.5956	-30.6607	hypo	hypo
Chr3	21247969	21249180	28328562	2.8378e+07	AT3G57410:CDS;	AT3G57410:CDS;	-45.7613	-30.6153	hypo	hypo
Chr1	12664335	12666437	2.51365e+07	2.52699e+07	AT1G34590:transposable_element_gene;AT1TE41345:transposable_element;	AT1G34590:transposable_element_gene;AT1G34600:transposable_element_gene;AT1TE41345:transposable_element;	-32.361	-30.3546	hypo	hypo
Chr1	4982836	4984790	2.09524e+07	2.11958e+07	AT1G14560:three_prime_UTR;AT1G14570:five_prime_UTR;	AT1G14560:three_prime_UTR;AT1G14570:five_prime_UTR;	-27.2253	-30.3325	hypo	hypo
Chr3	4686126	4689832	2.08877e+07	2.11328e+07	AT3G14130:five_prime_UTR;AT3G14140:CDS;	AT3G14120:three_prime_UTR;AT3G14130:three_prime_UTR;	-41.9836	-30.2643	hypo	hypo
Chr5	1874489	1874933	1.94427e+07	1.97258e+07	AT5G06180:CDS;	AT5G06180:three_prime_UTR;	-35.6259	-30.1827	hypo	hypo
Chr1	26710682	26711292	2.96011e+07	2.96171e+07	AT1G70830:five_prime_UTR;	AT1G70830:five_prime_UTR;AT1G70840:three_prime_UTR;	-30.5888	-30.1011	hypo	hypo
Chr1	10144573	10144905	2.38425e+07	2.40099e+07	NONE	NONE	-36.6248	-29.9055	hypo	hypo
Chr2	11289234	11291791	2.44895e+07	2.46399e+07	AT2G26540:five_prime_UTR;AT2G26550:three_prime_UTR;	AT2G26540:five_prime_UTR;AT2G26550:three_prime_UTR;	-42.693	-29.8851	hypo	hypo
Chr1	29166660	29167356	2.9903e+07	2.99111e+07	AT1G77610:CDS;	AT1G77610:three_prime_UTR;AT1G77620:three_prime_UTR;	-42.3408	-29.8503	hypo	hypo
Chr5	9306570	9307812	23367991	2.35479e+07	AT5G26710:CDS;	AT5G26710:CDS;	-45.9156	-29.8065	hypo	hypo
Chr1	29996743	29997954	3.00108e+07	3.00161e+07	AT1G79710:three_prime_UTR;AT1G79720:three_prime_UTR;	AT1G79710:three_prime_UTR;AT1G79720:CDS;	-44.4982	-29.5048	hypo	hypo
Chr1	2062431	2062810	1.95505e+07	1.98308e+07	AT1G06720:CDS;	AT1G06720:CDS;	-47.8599	-29.3559	hypo	hypo
Chr5	17836856	17838116	2.69914e+07	2.7076e+07	AT5G44280:CDS;	AT5G44270:CDS;AT5G44280:three_prime_UTR;	-42.5324	-29.3244	hypo	hypo
Chr4	9487352	9492061	2.34111e+07	2.35899e+07	AT4G16860:three_prime_UTR;AT4G16870:transposable_element_gene;AT4TE42860:transposable_element;	AT4G16860:three_prime_UTR;AT4G16870:transposable_element_gene;AT4TE42860:transposable_element;	-32.6555	-29.312	hypo	hypo
Chr2	10823863	10824278	2.4317e+07	2.44719e+07	AT2G25430:CDS;	AT2G25430:CDS;	-32.797	-29.2439	hypo	hypo
Chr1	27564301	27566075	2.97736e+07	2.97851e+07	AT1G73310:CDS;AT1G73320:three_prime_UTR;	AT1G73310:CDS;AT1G73320:three_prime_UTR;	-46.5893	-29.0903	hypo	hypo
Chr5	23196171	23199582	2.88678e+07	2.8903e+07	AT5G57250:CDS;AT5G57260:three_prime_UTR;	AT5G57240:three_prime_UTR;AT5G57250:three_prime_UTR;AT5G57260:three_prime_UTR,five_prime_UTR;AT5G57270:three_prime_UTR;	-32.9176	-28.9094	hypo	hypo
Chr1	30098175	30101673	30098639	30102423	AT1G80010:CDS;AT1G80020:transposable_element_gene;AT1TE98440:transposable_element;	AT1G80010:CDS;AT1G80020:transposable_element_gene;AT1TE98440:transposable_element;	-40.4624	-28.8823	hypo	hypo
Chr5	3330365	3330472	2.01544e+07	20418797	AT5G10540:CDS;	AT5G10540:CDS;	-38.5941	-28.7779	hypo	hypo
Chr4	18009235	18013741	2.70561e+07	27138989	AT4G38500:three_prime_UTR;AT4G38510:three_prime_UTR;	AT4G38500:three_prime_UTR;AT4G38510:three_prime_UTR;	-20.8922	-28.725	hypo	hypo
Chr3	21650764	21652956	2.84364e+07	2.8483e+07	AT3G58560:three_prime_UTR;	AT3G58530:three_prime_UTR;AT3G58540:three_prime_UTR,five_prime_UTR;AT3G58550:three_prime_UTR,five_prime_UTR;AT3G58560:three_prime_UTR;	-31.1356	-28.6834	hypo	hypo
Chr5	21342731	21343520	2.83717e+07	2.842e+07	AT5G52580:three_prime_UTR;AT5G52600:three_prime_UTR;	AT5G52580:three_prime_UTR;AT5G52600:three_prime_UTR;	-40.3119	-28.649	hypo	hypo
Chr5	3898635	3899882	2.04132e+07	2.06708e+07	AT5G12080:CDS;	AT5G12080:CDS;	-29.8767	-28.6312	hypo	hypo
Chr5	18671842	18672077	2.73796e+07	27453998	AT5G46040:CDS;	AT5G46030:three_prime_UTR;AT5G46040:CDS;	-30.4035	-28.5981	hypo	hypo
Chr1	2041458	2045429	1.95289e+07	1.98098e+07	AT1G06670:CDS;	AT1G06670:CDS;	-36.7305	-28.375	hypo	hypo
Chr4	15882469	15884383	2.61071e+07	2.6215e+07	AT4G32910:CDS;	AT4G32910:CDS;	-29.181	-28.3138	hypo	hypo
Chr2	19435857	19436316	2.77678e+07	2.7832e+07	AT2G47350:three_prime_UTR;	AT2G47350:three_prime_UTR;	-40.0234	-28.2438	hypo	hypo
Chr3	8633063	8634716	2.27641e+07	2.29599e+07	AT3G23900:CDS;	AT3G23900:three_prime_UTR;	-20.3127	-28.2317	hypo	hypo
Chr3	4855548	4859782	2.09308e+07	2.11748e+07	AT3G14460:CDS;AT3G14470:CDS;	AT3G14460:CDS;AT3G14470:CDS;	-37.6598	-28.2065	hypo	hypo
Chr3	18954857	18957437	2.75306e+07	2.7601e+07	AT3G51050:CDS;	AT3G51050:CDS;	-25.8098	-28.1047	hypo	hypo
Chr1	8760047	8760285	2.28504e+07	23043872	AT1G24764:CDS;	AT1G24764:CDS;	-49.3443	-28.0621	hypo	hypo
Chr3	20323076	20324659	2.80913e+07	2.8147e+07	AT3G54850:three_prime_UTR;AT3G54860:three_prime_UTR;	AT3G54850:three_prime_UTR;AT3G54860:three_prime_UTR;	-28.8968	-27.6873	hypo	hypo
Chr2	15077548	15078235	2.5913e+07	2.6026e+07	AT2G35920:CDS;	AT2G35920:CDS;	-23.0468	-27.5371	hypo	hypo
Chr4	8865473	8867877	2.29151e+07	2.31069e+07	AT4G15530:CDS;	AT4G15530:CDS;	-41.5154	-27.5209	hypo	hypo
Chr5	23664163	23666359	2.89325e+07	2.8966e+07	AT5G58540:three_prime_UTR;AT5G58550:three_prime_UTR;	AT5G58540:three_prime_UTR;AT5G58550:three_prime_UTR;	-43.9856	-27.2647	hypo	hypo
Chr4	16724470	16725561	2.64522e+07	2.6551e+07	AT4G35140:CDS;	AT4G35130:CDS;AT4G35140:three_prime_UTR;	-37.9167	-27.1757	hypo	hypo
Chr1	10425004	10427384	2.41013e+07	2.42619e+07	AT1G29770:three_prime_UTR;AT1G29780:CDS;	AT1G29770:three_prime_UTR;AT1G29780:CDS;	-26.4387	-27.0724	hypo	hypo
Chr2	16990556	16993519	2.66247e+07	26718977	AT2G40730:CDS;	AT2G40730:CDS;	-28.4958	-27.0501	hypo	hypo
Chr1	11394192	11394570	2.45542e+07	2.47029e+07	AT1G31780:CDS;	AT1G31780:CDS;	-27.3255	-27.0219	hypo	hypo
Chr1	29150762	29154041	2.98814e+07	2.98901e+07	AT1G77590:five_prime_UTR;AT1G77600:three_prime_UTR;	AT1G77590:CDS;	-29.4063	-27.0172	hypo	hypo
Chr1	27164279	27168364	2.9752e+07	29764064	AT1G72180:three_prime_UTR;AT1G72190:three_prime_UTR;	AT1G72180:three_prime_UTR;AT1G72190:three_prime_UTR;	-37.9761	-26.9788	hypo	hypo
Chr3	4423649	4426812	2.08014e+07	21048815	AT3G13550:three_prime_UTR,five_prime_UTR;AT3G13560:three_prime_UTR;	AT3G13550:three_prime_UTR,five_prime_UTR;AT3G13560:three_prime_UTR;	-22.6761	-26.9495	hypo	hypo
Chr1	30001762	30004909	3.00324e+07	3.00371e+07	AT1G79730:five_prime_UTR;AT1G79740:CDS;	AT1G79730:five_prime_UTR;AT1G79740:CDS;	-23.5371	-26.7806	hypo	hypo
Chr3	3934778	3938882	2.04779e+07	20733806	AT3G12360:three_prime_UTR;AT3G12370:three_prime_UTR,five_prime_UTR;AT3G12380:three_prime_UTR;	AT3G12350:three_prime_UTR;AT3G12360:three_prime_UTR,five_prime_UTR;AT3G12370:three_prime_UTR,five_prime_UTR;AT3G12380:three_prime_UTR;	-22.7982	-26.6934	hypo	hypo
Chr2	9846066	9846563	2.36052e+07	23778893	AT2G23140:CDS;	AT2G23140:CDS;	-39.1383	-26.6605	hypo	hypo
Chr1	16154662	16157000	2.62365e+07	2.6341e+07	AT1G43020:three_prime_UTR,five_prime_UTR;AT1TE53230:transposable_element;AT1TE53235:transposable_element;	AT1G43010:CDS;AT1G43020:three_prime_UTR,five_prime_UTR;AT1TE53230:transposable_element;AT1TE53235:transposable_element;	-37.4806	-26.5973	hypo	hypo
Chr3	5216637	5218372	2.10602e+07	2.13008e+07	AT3G15470:CDS;	AT3G15470:CDS;	-30.4801	-26.5758	hypo	hypo
Chr5	25687498	25690803	29406947	2.94281e+07	AT5G64220:CDS;	AT5G64220:CDS;	-21.8783	-26.5523	hypo	hypo
Chr5	26477042	26477418	2.95364e+07	29554058	AT5G66280:CDS;	AT5G66280:CDS;	-41.3146	-26.4771	hypo	hypo
Chr2	13616357	13618241	2.54385e+07	25563944	AT2G32000:CDS;	AT2G32000:CDS;	-60.644	-26.3275	hypo	hypo
Chr4	14109799	14113560	2.56326e+07	2.57529e+07	AT4G28540:three_prime_UTR;AT4G28550:three_prime_UTR,five_prime_UTR;	AT4G28540:three_prime_UTR;AT4G28550:three_prime_UTR,five_prime_UTR;	-31.9797	-26.153	hypo	hypo
Chr1	9040430	9040620	2.31307e+07	2.33169e+07	AT1G26150:CDS;	AT1G26130:three_prime_UTR;AT1G26140:CDS;AT1G26150:three_prime_UTR;	-51.487	-26.0844	hypo	hypo
Chr4	6040657	6041778	2.15132e+07	2.17418e+07	AT4G09560:three_prime_UTR;	AT4G09550:three_prime_UTR;AT4G09560:three_prime_UTR;	-45.6379	-26.0554	hypo	hypo
Chr5	1132978	1137444	1.90113e+07	1.93058e+07	AT5G04140:CDS;	AT5G04140:CDS;	-28.9321	-26.0003	hypo	hypo
Chr3	19321312	19322240	2.77031e+07	27769007	AT3G52100:CDS;	AT3G52100:CDS;	-35.8827	-25.9734	hypo	hypo
Chr1	5626374	5627931	2.12975e+07	2.15318e+07	AT1G16480:CDS;	AT1G16480:CDS;	-46.8417	-25.9499	hypo	hypo
Chr1	30065360	30065879	30065360	30066458	AT1G79930:CDS;	AT1G79930:CDS;	-50.1721	-25.9335	hypo	hypo
Chr3	802246	805068	1.88172e+07	1.91168e+07	AT3G03380:CDS;	AT3G03380:CDS;	-23.9847	-25.9032	hypo	hypo
Chr3	14756371	14757799	2.58267e+07	2.5942e+07	AT3G42670:CDS;	AT3G42670:CDS;AT3G42680:transposable_element_gene;AT3TE60370:transposable_element;AT3TE60375:transposable_element;	-39.7281	-25.6946	hypo	hypo
Chr4	2580881	2583951	19917159	2.01878e+07	AT4G05040:three_prime_UTR;AT4TE12090:transposable_element;AT4TE12095:transposable_element;	AT4G05040:CDS;	-47.6199	-25.6084	hypo	hypo
Chr1	5328174	5330416	2.1125e+07	21363824	AT1G15500:three_prime_UTR;AT1G15510:CDS;	AT1G15500:three_prime_UTR;AT1G15510:CDS;AT1G15520:three_prime_UTR;	-30.7546	-25.5412	hypo	hypo
Chr4	6977589	6977652	2.18367e+07	2.20568e+07	NONE	NONE	-38.774	-25.4449	hypo	hypo
Chr5	2759759	2761159	1.99819e+07	2.02508e+07	AT5G08530:three_prime_UTR;	AT5G08530:three_prime_UTR;	-36.3245	-25.4098	hypo	hypo
Chr5	22738147	22738834	2.87383e+07	2.8777e+07	AT5G56180:three_prime_UTR;	AT5G56170:three_prime_UTR;AT5G56180:three_prime_UTR;	-33.4619	-25.4056	hypo	hypo
Chr3	242906	244764	1.84506e+07	1.87597e+07	AT3G01650:CDS;	AT3G01650:CDS;	-24.2992	-25.3933	hypo	hypo
Chr2	19552600	19552722	2.78109e+07	27874010	AT2G47700:CDS;	AT2G47700:CDS;	-37.8355	-25.2069	hypo	hypo
Chr5	22891231	22891264	2.87815e+07	28819037	AT5G56530:CDS;	AT5G56530:three_prime_UTR;AT5G56540:five_prime_UTR;	-30.3276	-25.1557	hypo	hypo
Chr3	2371229	2371316	1.97446e+07	2.00198e+07	AT3G07400:CDS;	AT3G07400:CDS;	-37.7997	-25.0308	hypo	hypo
Chr5	9821385	9822444	2.35621e+07	2.37369e+07	AT5G27730:CDS;	AT5G27730:three_prime_UTR;	-43.2562	-24.7409	hypo	hypo
Chr5	15828343	15830289	2.60855e+07	26193962	AT5TE57140:transposable_element;AT5TE57145:transposable_element;	AT5G39532:pseudogene;AT5TE57140:transposable_element;AT5TE57145:transposable_element;	-31.6141	-24.6765	hypo	hypo
Chr1	25485066	25485207	2.93422e+07	2.93651e+07	AT1G67970:CDS;	AT1G67960:five_prime_UTR;AT1G67970:three_prime_UTR;	-39.6626	-24.5316	hypo	hypo
Chr3	262933	264491	1.84937e+07	1.88018e+07	AT3G01720:CDS;	AT3G01720:CDS;	-27.8222	-24.4704	hypo	hypo
Chr3	8989556	8989800	2.30229e+07	2.32119e+07	AT3G24630:CDS;	AT3G24630:CDS;	-24.2171	-24.298	hypo	hypo
Chr5	2683491	2685409	1.99387e+07	20208791	AT5G08335:three_prime_UTR;AT5G08340:five_prime_UTR;	AT5G08335:three_prime_UTR;AT5G08340:five_prime_UTR;	-50.423	-24.1925	hypo	hypo
Chr4	13025581	13029796	2.52444e+07	2.53749e+07	AT4G25500:three_prime_UTR,five_prime_UTR;AT4G25510:CDS;AT4G25515:CDS;	AT4G25500:five_prime_UTR;	-25.3088	-23.7883	hypo	hypo
Chr2	13282949	13283984	2.53738e+07	2.55009e+07	AT2G31170:CDS;	AT2G31170:CDS;	-40.7008	-23.675	hypo	hypo
Chr4	6400190	6401499	2.17288e+07	2.19518e+07	AT4G10320:CDS;	AT4G10320:CDS;	-47.2905	-23.602	hypo	hypo
Chr1	7601401	7602267	2.22249e+07	2.24349e+07	AT1G21650:CDS;AT1G21651:CDS;	AT1G21650:five_prime_UTR;AT1G21651:three_prime_UTR;	-53.4511	-23.5188	hypo	hypo
Chr3	8736991	8738811	2.28288e+07	2.30229e+07	AT3G24180:CDS;	AT3G24180:CDS;	-24.2898	-23.5144	hypo	hypo
Chr3	9088201	9088220	2.3217e+07	2.34009e+07	AT3G24880:mRNA;	AT3G24880:CDS;	-48.9184	-23.2718	hypo	hypo
Chr5	8480257	8483806	2.26994e+07	2.28969e+07	AT5G24740:CDS;	AT5G24740:CDS;	-39.2644	-23.1971	hypo	hypo
Chr5	3630997	3632758	2.02622e+07	20523800	AT5G11380:CDS;	AT5G11380:three_prime_UTR;AT5G11390:three_prime_UTR,five_prime_UTR;AT5G11400:three_prime_UTR;AT5G11410:CDS;	-21.0373	-23.1583	hypo	hypo
Chr1	24065923	24066287	2.89972e+07	29029043	AT1G64790:CDS;	AT1G64790:three_prime_UTR;AT1TE79130:transposable_element;	-48.1515	-23.1352	hypo	hypo
Chr5	267413	268378	1.85153e+07	1.88228e+07	AT5G01715:pseudogene;AT5G01720:CDS;	AT5G01715:pseudogene;AT5G01720:CDS;	-20.9616	-23.1005	hypo	hypo
Chr5	26314964	26317672	2.95148e+07	2.95331e+07	AT5G65770:three_prime_UTR;AT5G65780:three_prime_UTR,five_prime_UTR;	AT5G65770:CDS;AT5G65780:CDS;	-42.5549	-23.0979	hypo	hypo
Chr4	2510584	2518287	1.98525e+07	2.01248e+07	AT4G04930:three_prime_UTR;AT4G04940:three_prime_UTR,five_prime_UTR;AT4G04950:three_prime_UTR;	AT4G04940:five_prime_UTR;AT4G04950:three_prime_UTR;	-21.0203	-23.0684	hypo	hypo
Chr3	1974650	1977796	1.95074e+07	19788779	AT3G06440:five_prime_UTR;AT3G06450:three_prime_UTR;	AT3G06440:five_prime_UTR;AT3G06450:three_prime_UTR;	-36.3341	-23.0483	hypo	hypo
Chr2	8862148	8864038	2.28935e+07	2.30859e+07	AT2G20580:CDS;	AT2G20580:CDS;	-25.5789	-22.9872	hypo	hypo
Chr1	18673413	18675723	2.74012e+07	2.7475e+07	AT1G50410:CDS;	AT1G50410:CDS;	-36.4114	-22.8457	hypo	hypo
Chr2	11848314	11850513	2.47699e+07	2.49129e+07	AT2G27790:five_prime_UTR;AT2G27800:CDS;	AT2G27790:five_prime_UTR;AT2G27800:CDS;	-31.924	-22.7833	hypo	hypo
Chr1	7327955	7328843	2.21602e+07	2.23719e+07	AT1G20980:CDS;	AT1G20980:CDS;	-44.5371	-22.6824	hypo	hypo
Chr1	11750471	11750530	2.47052e+07	2.48499e+07	AT1G32500:CDS;	AT1G32490:five_prime_UTR;AT1G32500:three_prime_UTR;	-41.5604	-22.5251	hypo	hypo
Chr2	12124909	12125316	24877730	2.50179e+07	AT2G28360:CDS;	AT2G28360:CDS;	-45.1926	-22.4849	hypo	hypo
Chr5	25583873	25585593	2.93638e+07	2.93861e+07	AT5G63930:CDS;	AT5G63930:CDS;	-43.7462	-22.4212	hypo	hypo
Chr1	3819341	3820386	2.03269e+07	2.05868e+07	AT1G11350:CDS;	AT1G11340:CDS;AT1G11350:three_prime_UTR;	-31.2285	-22.4023	hypo	hypo
Chr2	8223672	8225752	2.25269e+07	22728863	AT2G18960:CDS;	AT2G18960:CDS;	-37.1262	-22.3812	hypo	hypo
Chr1	314052	314545	1.858e+07	1.88858e+07	AT1G01910:CDS;	AT1G01910:CDS;	-46.0434	-22.3627	hypo	hypo
Chr1	23804092	23805910	28975593	2.9008e+07	AT1G64140:CDS;AT1G64142:three_prime_UTR;	AT1G64140:CDS;AT1G64142:three_prime_UTR;	-22.9296	-22.322	hypo	hypo
Chr3	2453911	2456418	1.97662e+07	2.00408e+07	AT3G07670:three_prime_UTR;AT3G07680:five_prime_UTR;	AT3G07680:three_prime_UTR;	-40.6575	-22.2353	hypo	hypo
Chr3	18385915	18388055	2.72933e+07	2.737e+07	AT3G49600:five_prime_UTR;AT3G49601:three_prime_UTR;	AT3G49600:CDS;	-22.5342	-22.1867	hypo	hypo
Chr3	10010358	10010899	2.37562e+07	2.39259e+07	AT3G27150:CDS;	AT3G27150:CDS;	-31.395	-22.0444	hypo	hypo
Chr3	318955	320500	1.86015e+07	1.89068e+07	AT3G01920:three_prime_UTR;AT3G01930:three_prime_UTR;	AT3G01920:three_prime_UTR;AT3G01930:three_prime_UTR;	-40.7834	-22.0242	hypo	hypo
Chr1	22344732	22346966	2.86305e+07	2.8672e+07	AT1G60670:three_prime_UTR;	AT1G60670:three_prime_UTR;	-43.3134	-21.9715	hypo	hypo
Chr3	1742707	1744320	1.93348e+07	1.96208e+07	AT3G05840:three_prime_UTR;AT3G05850:transposable_element_gene;AT3TE07330:transposable_element;	AT3G05840:three_prime_UTR;AT3G05850:transposable_element_gene;AT3TE07330:transposable_element;	-36.3074	-21.9621	hypo	hypo
Chr5	16449740	16452524	2.6409e+07	26508971	AT5G41100:three_prime_UTR;AT5G41109:CDS;AT5G41110:five_prime_UTR;	AT5G41100:three_prime_UTR;AT5G41109:CDS;AT5G41110:five_prime_UTR;AT5G41120:three_prime_UTR;	-22.1184	-21.9243	hypo	hypo
Chr4	153330	153505	1.83427e+07	1.86547e+07	AT4G00350:CDS;	AT4G00340:three_prime_UTR;AT4G00342:CDS;AT4G00350:five_prime_UTR;	-35.2277	-21.8743	hypo	hypo
Chr2	9069857	9071641	23152314	2.33379e+07	AT2G21160:three_prime_UTR;AT2G21170:three_prime_UTR;	AT2G21150:three_prime_UTR;AT2G21160:three_prime_UTR,five_prime_UTR;AT2G21170:three_prime_UTR;	-39.4272	-21.7619	hypo	hypo
Chr3	19383812	19385539	2.77462e+07	2.7811e+07	AT3G52260:three_prime_UTR;	AT3G52250:CDS;AT3G52260:three_prime_UTR;	-42.6312	-21.7304	hypo	hypo
Chr1	11158339	11159523	24446376	2.45979e+07	AT1G31220:three_prime_UTR;AT1G31230:three_prime_UTR;	AT1G31220:three_prime_UTR;AT1G31230:three_prime_UTR;	-38.3782	-21.7256	hypo	hypo
Chr4	5384547	5392593	2.11681e+07	2.14058e+07	AT4G08470:five_prime_UTR;AT4G08480:three_prime_UTR;AT4TE22520:transposable_element;AT4TE22525:transposable_element;AT4TE22530:transposable_element;AT4TE22535:transposable_element;	AT4G08470:CDS;	-42.3288	-21.6866	hypo	hypo
Chr1	10479685	10484716	2.41444e+07	24303908	AT1G29940:CDS;	AT1G29940:CDS;	-33.3511	-21.6355	hypo	hypo
Chr1	19863265	19865096	27897208	2.7958e+07	AT1G53270:CDS;AT1G53280:three_prime_UTR;	AT1G53270:CDS;	-28.4292	-21.6277	hypo	hypo
Chr1	11432090	11434616	2.45758e+07	24723920	AT1G31850:three_prime_UTR;AT1G31860:three_prime_UTR;	AT1G31850:three_prime_UTR;AT1G31860:three_prime_UTR;	-40.6572	-21.5687	hypo	hypo
Chr2	11899762	11900026	2.47915e+07	24933926	AT2G27950:CDS;	AT2G27950:CDS;	-43.3988	-21.5677	hypo	hypo
Chr1	2895310	2897400	2.00466e+07	20313794	AT1G09010:CDS;	AT1G09000:three_prime_UTR;AT1G09010:three_prime_UTR;	-43.2806	-21.5049	hypo	hypo
Chr1	25277742	25277966	2.9256e+07	2.92811e+07	AT1G67480:CDS;	AT1G67480:CDS;	-33.4908	-21.3334	hypo	hypo
Chr5	16217482	16222296	2.62796e+07	2.6383e+07	AT5G40480:CDS;	AT5G40480:CDS;	-33.2592	-21.3099	hypo	hypo
Chr4	8581166	8583428	22720960	2.29179e+07	AT4G15030:three_prime_UTR;AT4G15040:CDS;	AT4G15040:CDS;AT4TE38220:transposable_element;AT4TE38225:transposable_element;AT4TE38230:transposable_element;AT4TE38235:transposable_element;	-44.5628	-21.2484	hypo	hypo
Chr4	18136100	18137072	2.71639e+07	27243992	AT4G38890:CDS;	AT4G38890:CDS;	-22.798	-21.1957	hypo	hypo
Chr1	8891057	8892924	22936637	2.31279e+07	AT1G25350:CDS;	AT1G25350:CDS;	-33.6075	-21.0879	hypo	hypo
Chr1	1317301	1320309	1.91192e+07	1.94108e+07	AT1G04700:CDS;	AT1G04700:CDS;	-44.7188	-20.8248	hypo	hypo
Chr5	4997005	5000572	2.0974e+07	2.12168e+07	AT5G15390:three_prime_UTR;AT5G15400:three_prime_UTR;	AT5G15390:three_prime_UTR;AT5G15400:three_prime_UTR;	-41.5686	-20.807	hypo	hypo
Chr1	2503118	2505438	1.98309e+07	20103788	AT1G08060:CDS;	AT1G08060:CDS;	-40.813	-20.7176	hypo	hypo
Chr1	4725536	4728309	2.09093e+07	21153818	AT1G13780:three_prime_UTR;AT1G13790:CDS;	AT1G13790:CDS;	-22.2601	-20.6934	hypo	hypo
Chr5	3998483	4000588	2.05426e+07	2.07968e+07	AT5G12350:three_prime_UTR;	AT5G12350:three_prime_UTR;	-36.0272	-20.6101	hypo	hypo
Chr2	14325994	14326880	2.56973e+07	2.5816e+07	AT2G33860:CDS;	AT2G33860:CDS;	-43.226	-20.5459	hypo	hypo
Chr1	21259482	21260098	2.83501e+07	28399025	AT1G56710:five_prime_UTR;	AT1G56700:three_prime_UTR;AT1G56710:three_prime_UTR,five_prime_UTR;	-42.6216	-20.5316	hypo	hypo
Chr3	6036149	6036758	2.14916e+07	2.17208e+07	AT3G17650:CDS;	AT3G17650:CDS;	-35.185	-20.4979	hypo	hypo
Chr5	4134861	4137055	2.05858e+07	20838809	AT5G13030:three_prime_UTR;AT5G13050:three_prime_UTR;	AT5G13030:three_prime_UTR;AT5G13050:three_prime_UTR;	-21.167	-20.4646	hypo	hypo
Chr1	837211	841202	1.89035e+07	1.92008e+07	AT1G03380:three_prime_UTR;AT1G03390:CDS;	AT1G03380:three_prime_UTR;	-34.9714	-20.2167	hypo	hypo
Chr3	20074709	20075973	2.8005e+07	2.8063e+07	AT3G54230:CDS;	AT3G54230:three_prime_UTR;AT3G54240:CDS;	-22.3455	-20.199	hypo	hypo
Chr1	10446400	10446409	2.41229e+07	2.42829e+07	AT1G29840:mRNA;	AT1G29840:five_prime_UTR;AT1G29850:five_prime_UTR;	-47.4446	-20.1466	hypo	hypo
Chr1	7575008	7578211			AT1G21610:CDS;		-20.036		hypo
Chr4	10862937	10863148			AT4G20070:CDS;		-20.0776		hypo
Chr3	5690818	5691292			AT3G16710:CDS;		-20.0865		hypo
Chr5	24266028	24268463			AT5G60300:three_prime_UTR;AT5G60310:CDS;		-20.0928		hypo
Chr1	2685243	2686899			AT1G08480:three_prime_UTR;AT1G08490:three_prime_UTR;		-20.2759		hypo
Chr1	18711943	18712064			AT1G50500:CDS;		-20.3208		hypo
Chr2	13083056	13083595			AT2G30700:CDS;		-20.4307		hypo
Chr3	4236418	4236816			AT3G13180:CDS;		-20.4737		hypo
Chr2	2181920	2182701			AT2G05760:CDS;		-20.5161		hypo
Chr2	17034054	17038493			AT2G40810:three_prime_UTR;AT2G40815:three_prime_UTR,five_prime_UTR;AT2G40820:three_prime_UTR;		-20.5636		hypo
Chr4	9424969	9427595			AT4G16760:CDS;		-20.621		hypo
Chr4	5829766	5833304			AT4G09150:CDS;		-20.7371		hypo
Chr1	8073575	8073690			AT1G22800:CDS;		-20.8345		hypo
Chr1	9217121	9217176			AT1G26670:CDS;		-20.9035		hypo
Chr3	5768273	5768426			AT3G16890:CDS;		-20.9299		hypo
Chr1	6722164	6722442			AT1G19420:pseudogene;		-20.9954		hypo
Chr1	24415530	24415867			AT1G65650:CDS;		-21.0648		hypo
Chr4	18155814	18157883			AT4G38950:CDS;		-21.0699		hypo
Chr1	16275488	16276037			AT1G43190:CDS;		-21.0779		hypo
Chr1	8658794	8658923			AT1G24430:CDS;		-21.144		hypo
Chr1	20528265	20529960			AT1G55020:CDS;		-21.1492		hypo
Chr2	12648584	12648922			AT2G29560:CDS;		-21.1541		hypo
Chr3	23053022	23056778			AT3G62290:three_prime_UTR;AT3G62300:five_prime_UTR;		-21.2139		hypo
Chr1	12209111	12211411			AT1G33700:CDS;		-21.2144		hypo
Chr5	3449975	3452698			AT5G10940:CDS;		-21.2737		hypo
Chr3	6910549	6912134			AT3G19870:three_prime_UTR;AT3G19880:CDS;		-21.3402		hypo
Chr1	1791019	1793047			AT1G05910:CDS;AT1TE05870:transposable_element;		-21.343		hypo
Chr2	16097243	16100815			AT2G38440:CDS;		-21.4215		hypo
Chr5	14249311	14251864			AT5G36210:CDS;		-21.4258		hypo
Chr5	18616117	18616894			AT5G45900:CDS;		-21.4322		hypo
Chr1	22587582	22587648			AT1G61250:CDS;		-21.5777		hypo
Chr2	14640246	14642465			AT2G34710:CDS;		-21.6271		hypo
Chr5	19424776	19425465			AT5G47970:CDS;		-21.6781		hypo
Chr5	4371761	4375606			AT5G13580:three_prime_UTR;AT5G13590:three_prime_UTR;		-21.6814		hypo
Chr5	6139434	6140726			AT5G18500:CDS;		-21.7351		hypo
Chr1	13352235	13354097			AT1TE43660:transposable_element;AT1TE43665:transposable_element;AT1TE43670:transposable_element;		-21.7467		hypo
Chr1	2313998	2315061			AT1G07530:CDS;		-21.7644		hypo
Chr2	584410	585286			AT2G02220:CDS;		-21.8115		hypo
Chr3	1068841	1068928			AT3G04080:CDS;		-21.8181		hypo
Chr3	6828296	6830393			AT3G19670:CDS;		-21.9809		hypo
Chr5	7117968	7121196			AT5G20960:CDS;		-22.1044		hypo
Chr3	12191140	12191802			AT3TE50595:transposable_element;AT3TE50600:transposable_element;		-22.1198		hypo
Chr5	25042416	25043524			AT5G62370:CDS;		-22.1569		hypo
Chr2	10226120	10227535			AT2G24050:CDS;		-22.448		hypo
Chr2	15569920	15570491			AT2G37050:CDS;		-22.681		hypo
Chr1	17738469	17739129			AT1G48090:CDS;		-22.7096		hypo
Chr1	25474462	25474578			AT1G67930:CDS;		-23.0073		hypo
Chr1	25088213	25094794			AT1G67120:CDS;		-23.1012		hypo
Chr3	4625914	4627968			AT3G13990:CDS;		-23.1397		hypo
Chr4	15169884	15170931			AT4G31210:CDS;		-23.1569		hypo
Chr3	22490104	22491253			AT3G60860:CDS;		-23.2176		hypo
Chr4	18491498	18496671			AT4G39850:CDS;		-23.2658		hypo
Chr2	6198372	6198551			AT2G14540:CDS;		-23.2744		hypo
Chr1	19609061	19614389			AT1G52640:five_prime_UTR;AT1G52650:three_prime_UTR,five_prime_UTR;AT1G52660:CDS;		-23.3091		hypo
Chr1	30261927	30263789			AT1G80490:CDS;		-23.3161		hypo
Chr2	14974262	14979470			AT2G35630:CDS;		-23.3266		hypo
Chr3	6175577	6177487			AT3G18040:five_prime_UTR;		-23.3649		hypo
Chr4	8845337	8848062			AT4G15470:three_prime_UTR;AT4G15475:five_prime_UTR;		-23.4789		hypo
Chr4	8830274	8830546			AT4G15430:CDS;		-23.6009		hypo
Chr1	3587779	3589167			AT1G10760:CDS;		-23.6338		hypo
Chr4	7321554	7322938			AT4G12340:five_prime_UTR;AT4TE31900:transposable_element;		-23.7409		hypo
Chr2	17321108	17321906			AT2G41520:CDS;		-23.754		hypo
Chr2	14264839	14266512			AT2G33720:three_prime_UTR;AT2G33730:three_prime_UTR;		-24.0388		hypo
Chr2	5789090	5790172			AT2G13840:CDS;		-24.1728		hypo
Chr1	18526653	18529113			AT1G50030:CDS;		-24.5209		hypo
Chr4	9150346	9152529			AT4G16150:CDS;		-24.6952		hypo
Chr4	801932	804138			AT4G01860:CDS;		-24.8586		hypo
Chr4	15888650	15891028			AT4G32920:CDS;		-24.932		hypo
Chr4	17822837	17828923			AT4G37900:five_prime_UTR;AT4G37910:three_prime_UTR,five_prime_UTR;AT4G37920:three_prime_UTR;		-25.2732		hypo
Chr1	28134750	28136685			AT1G74900:three_prime_UTR;AT1G74910:three_prime_UTR;		-25.4914		hypo
Chr1	27788226	27788243			AT1G73890:CDS;		-25.5833		hypo
Chr2	14238130	14241446			AT2G33630:five_prime_UTR;AT2G33640:five_prime_UTR;		-25.5851		hypo
Chr4	7108781	7110632			AT4G11820:three_prime_UTR;		-25.6527		hypo
Chr3	3977058	3979601			AT3G12540:three_prime_UTR;AT3G12545:CDS;AT3G12550:five_prime_UTR;		-25.6969		hypo
Chr3	15593862	15596641			AT3G43688:transposable_element_gene;AT3TE63050:transposable_element;AT3TE63055:transposable_element;		-25.8187		hypo
Chr5	17853635	17855370			AT5G44316:CDS;AT5G44320:three_prime_UTR;		-25.8461		hypo
Chr5	6542136	6549168			AT5G19400:three_prime_UTR;AT5G19410:CDS;AT5G19420:three_prime_UTR;		-25.9323		hypo
Chr4	12238551	12240591			AT4G23440:CDS;		-25.9618		hypo
Chr5	21537458	21539387			AT5G53120:three_prime_UTR;AT5G53130:three_prime_UTR;		-26.003		hypo
Chr1	9672236	9673576			AT1G27770:CDS;		-26.0268		hypo
Chr1	2615853	2620108			AT1G08300:CDS;AT1G08310:five_prime_UTR;		-26.5191		hypo
Chr1	11540887	11542401			AT1G32090:CDS;		-26.6167		hypo
Chr1	5925216	5926056			AT1G17290:CDS;		-26.6927		hypo
Chr1	30059060	30061546			AT1G79920:CDS;		-26.7189		hypo
Chr4	2738405	2739605			AT4G05390:three_prime_UTR;		-26.7654		hypo
Chr1	25917386	25918998			AT1G68920:three_prime_UTR;AT1G68930:CDS;		-26.7922		hypo
Chr1	23625038	23628104			AT1G63700:three_prime_UTR;		-26.8177		hypo
Chr1	1733849	1735060			AT1G05790:five_prime_UTR;		-26.8965		hypo
Chr4	8531530	8535035			AT4G14920:CDS;		-26.9717		hypo
Chr4	1409373	1412416			AT4G03200:CDS;		-27.0115		hypo
Chr1	16654923	16657202			AT1G43900:three_prime_UTR;AT1G43910:three_prime_UTR;		-27.0738		hypo
Chr4	18045517	18047787			AT4G38600:CDS;		-27.1124		hypo
Chr1	4789716	4793934			AT1G13980:CDS;		-27.1197		hypo
Chr5	13922757	13924092			AT5G35753:CDS;		-27.1682		hypo
Chr1	19963183	19963507			AT1G53480:three_prime_UTR;AT1G53490:five_prime_UTR;		-27.5598		hypo
Chr5	19237196	19238379			AT5G47430:CDS;		-27.5888		hypo
Chr3	11914653	11915029			AT3G30280:CDS;		-27.8011		hypo
Chr3	2025073	2026273			AT3G06530:CDS;		-27.877		hypo
Chr1	19151199	19151623			AT1G51640:CDS;AT1G51645:ncRNA;		-27.8922		hypo
Chr4	8512929	8515547			AT4G14840:five_prime_UTR;AT4G14850:five_prime_UTR;		-28.0024		hypo
Chr1	11183694	11184639			AT1G31280:CDS;		-28.0412		hypo
Chr4	6518420	6519148			AT4G10550:CDS;		-28.0857		hypo
Chr5	8630016	8630047			NONE		-28.184		hypo
Chr1	6693079	6694081			AT1G19370:CDS;		-28.2891		hypo
Chr2	10543522	10545132			AT2G24750:pseudogene;AT2G24755:ncRNA;		-28.3571		hypo
Chr1	26783707	26787776			AT1G71010:CDS;		-28.448		hypo
Chr1	30105735	30106853			AT1G80030:CDS;		-28.5879		hypo
Chr5	13635597	13637962			AT5G35410:CDS;		-28.8011		hypo
Chr5	5101308	5101844			AT5G15680:CDS;		-28.9712		hypo
Chr3	10711117	10711294			AT3G28570:CDS;		-28.9721		hypo
Chr3	18350643	18352155			AT3G49500:CDS;		-29.1033		hypo
Chr1	23561312	23561318			AT1G63520:CDS;		-29.1172		hypo
Chr1	22019651	22021435			AT1G59820:three_prime_UTR;AT1G59830:three_prime_UTR;		-29.1181		hypo
Chr5	19561780	19562986			AT5G48250:CDS;		-29.1651		hypo
Chr3	22317237	22318029			AT3G60380:CDS;		-29.174		hypo
Chr1	28088014	28090914			AT1G74750:CDS;AT1G74770:three_prime_UTR;		-29.5732		hypo
Chr1	26274558	26275194			AT1G69800:CDS;		-29.7089		hypo
Chr5	24034880	24038695			AT5G59650:CDS;AT5G59660:CDS;		-29.7584		hypo
Chr1	22294819	22294979			AT1G60505:ncRNA;AT1G60510:pseudogene;		-29.7704		hypo
Chr3	12362384	12362853			AT3G30737:transposable_element_gene;AT3TE51210:transposable_element;		-29.7731		hypo
Chr3	6025889	6026869			AT3G17611:three_prime_UTR;AT3G17620:three_prime_UTR;		-29.7868		hypo
Chr5	23878093	23880621			AT5G59150:three_prime_UTR;AT5G59160:five_prime_UTR;		-29.7937		hypo
Chr5	23616799	23616856			AT5G58410:CDS;		-29.8471		hypo
Chr4	2040879	2044159			AT4G04230:transposable_element_gene;AT4G04245:transposable_element_gene;AT4TE09720:transposable_element;AT4TE09725:transposable_element;		-29.9159		hypo
Chr4	16425671	16429570			AT4G34330:CDS;AT4G34332:ncRNA;AT4G34340:three_prime_UTR,five_prime_UTR;AT4G34350:three_prime_UTR;		-30.08		hypo
Chr2	7037501	7039921			AT2G16230:CDS;AT2G16240:tRNA;AT2G16245:ncRNA;AT2G16250:CDS;AT2TE28655:transposable_element;		-30.128		hypo
Chr2	7791441	7795000			AT2G17930:CDS;		-30.1746		hypo
Chr2	1043018	1044430			AT2G03450:three_prime_UTR;AT2G03460:three_prime_UTR;		-30.1791		hypo
Chr3	23249368	23250960			AT3G62900:CDS;		-30.2255		hypo
Chr5	23491643	23496091			AT5G58040:CDS;AT5G58050:three_prime_UTR;		-30.2689		hypo
Chr4	4852594	4852610			AT4TE20200:transposable_element;		-30.2691		hypo
Chr4	14997193	14997471			AT4G30790:CDS;		-30.4806		hypo
Chr1	11397339	11401565			AT1G31800:three_prime_UTR;AT1G31810:three_prime_UTR;		-30.4856		hypo
Chr5	20326669	20326690			AT5G49960:CDS;		-30.4919		hypo
Chr1	27919719	27925969			AT1G74240:three_prime_UTR;AT1G74250:CDS;AT1G74260:three_prime_UTR;AT1TE91360:transposable_element;AT1TE91365:transposable_element;		-30.5342		hypo
Chr4	4202635	4204055			AT4G07410:CDS;		-30.5473		hypo
Chr1	12647123	12652118			AT1G34550:CDS;AT1TE41310:transposable_element;		-30.5931		hypo
Chr2	8773585	8774578			AT2G20330:CDS;		-30.6753		hypo
Chr4	1792460	1793560			AT4G03835:transposable_element_gene;AT4TE08960:transposable_element;		-30.7945		hypo
Chr2	10200681	10203144			AT2G23970:CDS;AT2G23980:three_prime_UTR;		-30.8206		hypo
Chr1	2370672	2372287			AT1G07670:CDS;		-30.8625		hypo
Chr5	7905133	7908217			AT5G23450:CDS;		-30.8882		hypo
Chr3	22239481	22241305			AT3G60176:ncRNA;AT3TE90555:transposable_element;AT3TE90560:transposable_element;		-30.9196		hypo
Chr3	1204597	1208797			AT3G04490:CDS;		-30.9536		hypo
Chr3	15035151	15036312			AT3G42993:transposable_element_gene;AT3TE61290:transposable_element;		-31.0641		hypo
Chr1	11520004	11520481			AT1G32040:transposable_element_gene;AT1TE37265:transposable_element;		-31.1252		hypo
Chr4	10674772	10675415			AT4G19600:CDS;		-31.4651		hypo
Chr5	15621874	15624588			AT5G39030:CDS;AT5TE56520:transposable_element;AT5TE56525:transposable_element;		-31.619		hypo
Chr4	9269298	9270717			AT4G16440:CDS;		-31.6973		hypo
Chr1	25149468	25153335			AT1G67220:three_prime_UTR;AT1G67230:three_prime_UTR;		-31.7911		hypo
Chr1	10670098	10670862			AT1G30290:CDS;		-31.8377		hypo
Chr1	22999033	23000796			AT1G62260:CDS;AT1G62262:three_prime_UTR;		-31.8474		hypo
Chr3	6107292	6108291			AT3G17840:CDS;		-31.8498		hypo
Chr1	3651126	3654446			AT1G10930:CDS;		-31.9194		hypo
Chr5	12250148	12250835			AT5G32600:transposable_element_gene;AT5TE43520:transposable_element;		-31.9637		hypo
Chr5	23447734	23448402			AT5G57890:CDS;		-31.973		hypo
Chr5	9599124	9600429			AT5G27240:CDS;		-31.9837		hypo
Chr1	12995914	12995918			NONE		-32.1057		hypo
Chr5	8115345	8116093			AT5G24010:CDS;		-32.1089		hypo
Chr2	14611600	14613439			AT2G34660:three_prime_UTR;AT2G34670:three_prime_UTR;		-32.1983		hypo
Chr5	5104666	5108220			AT5G15680:CDS;		-32.3342		hypo
Chr5	6161962	6162502			AT5G18550:CDS;		-32.4397		hypo
Chr5	2228204	2228398			AT5G07180:CDS;		-32.4556		hypo
Chr2	15794102	15794413			AT2G37650:CDS;		-32.4566		hypo
Chr4	12631768	12631977			AT4G24430:CDS;		-32.5998		hypo
Chr3	2040730	2041477			AT3G06550:CDS;		-32.6553		hypo
Chr5	26520764	26523900			AT5G66410:three_prime_UTR;AT5G66420:three_prime_UTR;		-32.6623		hypo
Chr3	11032394	11032438			AT3TE45865:transposable_element;		-32.677		hypo
Chr1	10034024	10038715			AT1G28530:five_prime_UTR;AT1G28540:three_prime_UTR,five_prime_UTR;AT1G28550:CDS;AT1G28560:three_prime_UTR;		-32.7084		hypo
Chr1	6435510	6436085			AT1G18690:CDS;		-32.7247		hypo
Chr3	8211427	8211675			NONE		-32.7303		hypo
Chr1	23533265	23533923			AT1G63450:CDS;		-32.7751		hypo
Chr3	1187640	1191340			AT3G04460:three_prime_UTR;AT3G04470:three_prime_UTR;		-32.8196		hypo
Chr4	9395589	9396876			AT4G16700:three_prime_UTR;		-32.8488		hypo
Chr5	9904397	9906775			AT5G27890:three_prime_UTR;AT5G27895:transposable_element_gene;AT5TE36080:transposable_element;		-32.897		hypo
Chr1	30325090	30325429			AT1G80680:CDS;		-33.0308		hypo
Chr1	26386238	26386561			AT1G70060:CDS;		-33.0685		hypo
Chr5	25511192	25511211			AT5G63740:CDS;		-33.1066		hypo
Chr5	16367453	16368512			AT5G40850:CDS;		-33.1974		hypo
Chr3	9861745	9861793			NONE		-33.2813		hypo
Chr1	27539320	27539680			AT1G73220:CDS;		-33.3689		hypo
Chr5	6771331	6771358			NONE		-33.3714		hypo
Chr2	16353167	16355738			AT2G39190:three_prime_UTR;		-33.4106		hypo
Chr2	1103936	1104627			AT2G03630:three_prime_UTR;AT2G03640:three_prime_UTR;		-33.4756		hypo
Chr5	20950789	20951152			AT5G51570:CDS;		-33.4898		hypo
Chr5	4697855	4700864			AT5G14580:CDS;		-33.5271		hypo
Chr2	11275073	11276632			AT2G26510:CDS;		-33.6188		hypo
Chr3	16245037	16246038			AT3G44705:transposable_element_gene;		-33.6472		hypo
Chr3	726309	726935			AT3G03140:CDS;		-33.687		hypo
Chr5	789428	792323			AT5G03280:CDS;		-33.8202		hypo
Chr5	12765594	12765616			AT5G33533:transposable_element_gene;		-33.9311		hypo
Chr2	15894836	15895578			AT2G37980:CDS;		-33.9312		hypo
Chr2	11735656	11736690			AT2G27440:pseudogene;		-33.961		hypo
Chr4	16094212	16094552			AT4G33440:CDS;		-34.1429		hypo
Chr3	20647308	20648529			AT3G55650:CDS;		-34.1505		hypo
Chr4	5163729	5164195			AT4G08170:CDS;		-34.176		hypo
Chr3	352577	353981			AT3G02050:CDS;		-34.2337		hypo
Chr1	25387341	25390332			AT1G67720:CDS;		-34.2462		hypo
Chr4	16142742	16142801			AT4G33590:CDS;		-34.302		hypo
Chr5	21106487	21106684			AT5G51950:CDS;		-34.3342		hypo
Chr5	9980517	9980748			AT5G27947:transposable_element_gene;AT5TE36330:transposable_element;		-34.37		hypo
Chr5	3362154	3363228			AT5G10630:CDS;		-34.4456		hypo
Chr2	7744420	7745269			AT2G17820:CDS;		-34.4832		hypo
Chr1	1796028	1796215			AT1G05910:CDS;		-34.5241		hypo
Chr3	13875126	13875189			AT3G33109:transposable_element_gene;AT3TE57050:transposable_element;		-34.5508		hypo
Chr4	781249	782779			AT4G01820:CDS;		-34.6578		hypo
Chr2	4501730	4502778			AT2G11320:transposable_element_gene;AT2TE18840:transposable_element;AT2TE18845:transposable_element;		-34.6782		hypo
Chr2	11632243	11636295			AT2G27210:three_prime_UTR;		-34.7502		hypo
Chr1	9925346	9925365			NONE		-34.766		hypo
Chr2	11676147	11676323			AT2G27285:CDS;		-34.7886		hypo
Chr1	8879213	8879930			AT1G25320:CDS;		-34.8205		hypo
Chr5	25707756	25710579			AT5G64270:CDS;		-34.8559		hypo
Chr1	12272540	12273935			AT1G33813:transposable_element_gene;AT1TE39870:transposable_element;AT1TE39875:transposable_element;AT1TE39880:transposable_element;		-34.8865		hypo
Chr2	13047619	13049559			AT2G30630:five_prime_UTR;AT2G30640:transposable_element_gene;AT2TE57160:transposable_element;		-35.0072		hypo
Chr4	12389022	12389054			AT4G23790:CDS;		-35.0109		hypo
Chr3	7623055	7623078			AT3G21650:CDS;		-35.0368		hypo
Chr5	5570208	5570629			AT5G16930:CDS;		-35.0493		hypo
Chr2	7547793	7547890			AT2G17360:CDS;		-35.0914		hypo
Chr5	9436859	9439384			AT5G26820:three_prime_UTR;AT5G26830:five_prime_UTR;		-35.1026		hypo
Chr4	9778243	9778326			AT4G17550:CDS;		-35.3469		hypo
Chr4	6773850	6776618			AT4G11110:CDS;		-35.3667		hypo
Chr4	15759781	15761011			AT4G32670:CDS;		-35.3709		hypo
Chr1	19938916	19939933			AT1G53430:CDS;		-35.3919		hypo
Chr2	8614559	8616972			AT2G19940:three_prime_UTR;AT2G19950:three_prime_UTR;		-35.4618		hypo
Chr1	24287775	24288146			AT1G65380:CDS;		-35.5132		hypo
Chr2	19455059	19455915			AT2G47410:CDS;		-35.5157		hypo
Chr5	2296433	2297484			AT5G07290:CDS;		-35.5827		hypo
Chr2	11491359	11493176			AT2G26920:three_prime_UTR;AT2G26930:three_prime_UTR;		-35.6016		hypo
Chr3	5531455	5533594			AT3G16320:CDS;		-35.6268		hypo
Chr5	10277507	10279068			AT5G28290:three_prime_UTR;		-35.6637		hypo
Chr4	14180102	14180620			AT4G28710:CDS;		-35.6856		hypo
Chr1	9855747	9856967			AT1G28210:CDS;		-35.6871		hypo
Chr1	27475603	27475632			AT1G73040:CDS;		-35.767		hypo
Chr2	36726	39102			AT2G01029:transposable_element_gene;AT2TE00030:transposable_element;		-35.801		hypo
Chr3	16856727	16858764			AT3G45850:CDS;		-35.826		hypo
Chr3	8781826	8781844			AT3G24240:CDS;		-35.9106		hypo
Chr5	6943527	6945075			AT5G20520:three_prime_UTR;		-35.9204		hypo
Chr2	13020690	13022570			AT2G30575:CDS;		-36.0462		hypo
Chr5	5048261	5051705			AT5G15540:CDS;		-36.1263		hypo
Chr2	11758442	11758576			AT2G27510:CDS;		-36.2588		hypo
Chr2	9475571	9476038			AT2G22300:CDS;		-36.2696		hypo
Chr2	17729981	17730425			AT2G42580:CDS;		-36.2946		hypo
Chr4	1120995	1121123			AT4G02550:CDS;		-36.3491		hypo
Chr5	21488935	21491065			AT5G53010:CDS;		-36.4183		hypo
Chr5	20924369	20924396			NONE		-36.4518		hypo
Chr4	6051001	6052592			AT4G09570:three_prime_UTR;AT4G09580:three_prime_UTR;		-36.6473		hypo
Chr4	2564274	2564360			AT4G05000:CDS;		-36.6888		hypo
Chr5	6627545	6628324			AT5G19620:three_prime_UTR;AT5G19630:three_prime_UTR;		-36.7154		hypo
Chr1	20780827	20780880			AT1G55610:CDS;		-36.7362		hypo
Chr1	23973251	23974344			AT1G64550:three_prime_UTR;AT1G64560:pseudogene;AT1G64561:three_prime_UTR;		-36.7898		hypo
Chr4	8039936	8039953			AT4G13900:pseudogene;AT4TE35460:transposable_element;		-36.9544		hypo
Chr4	9690571	9696919			AT4G17330:CDS;		-37.1039		hypo
Chr5	19662067	19663131			AT5G48520:CDS;		-37.1202		hypo
Chr2	9409059	9413732			AT2G22125:CDS;		-37.1833		hypo
Chr4	5731462	5731540			AT4G08940:CDS;		-37.2393		hypo
Chr1	17873870	17876145			AT1G48370:five_prime_UTR;AT1TE59315:transposable_element;AT1TE59320:transposable_element;		-37.4959		hypo
Chr1	28417736	28417748			AT1G75680:CDS;		-37.5805		hypo
Chr3	16798113	16798146			NONE		-37.7795		hypo
Chr3	18936442	18937664			AT3G50950:CDS;		-37.7892		hypo
Chr2	6245435	6245452			AT2G14620:CDS;		-37.8774		hypo
Chr1	25309253	25311518			AT1G67530:three_prime_UTR;AT1G67540:three_prime_UTR;		-37.9067		hypo
Chr2	12425961	12427361			AT2G28930:three_prime_UTR;AT2G28940:three_prime_UTR;		-38.0086		hypo
Chr1	29212103	29212335			AT1G77720:CDS;		-38.135		hypo
Chr1	26411347	26411402			AT1G70130:CDS;		-38.177		hypo
Chr1	2158053	2158239			AT1G07025:CDS;		-38.1884		hypo
Chr2	9267967	9268369			AT2G21680:CDS;		-38.2427		hypo
Chr1	17954668	17956784			AT1G48560:three_prime_UTR;AT1G48570:three_prime_UTR;		-38.3088		hypo
Chr3	5835485	5835557			NONE		-38.3251		hypo
Chr5	5524542	5524879			AT5G16800:three_prime_UTR;		-38.4143		hypo
Chr4	8393466	8393558			AT4G14630:CDS;		-38.4175		hypo
Chr4	5598864	5599243			AT4G08770:CDS;		-38.4583		hypo
Chr2	11110103	11110447			AT2G26080:CDS;		-38.5341		hypo
Chr3	8045248	8048535			AT3G22760:three_prime_UTR;AT3G22770:CDS;		-38.6663		hypo
Chr5	11473443	11473724			AT5G31962:transposable_element_gene;AT5TE41485:transposable_element;		-38.7259		hypo
Chr4	2501806	2504198			AT4G04920:CDS;		-38.7326		hypo
Chr5	18267053	18270809			AT5G45160:three_prime_UTR;AT5G45170:three_prime_UTR;		-38.8639		hypo
Chr5	2639726	2639905			AT5G08200:CDS;		-39.0493		hypo
Chr4	337164	339550			AT4G00800:CDS;		-39.3621		hypo
Chr5	8786935	8788417			AT5G25310:three_prime_UTR;AT5G25320:CDS;		-39.4327		hypo
Chr3	21334080	21335569			AT3G57610:three_prime_UTR;		-39.4853		hypo
Chr4	5615244	5617141			AT4G08800:CDS;AT4G08810:three_prime_UTR;		-39.4899		hypo
Chr2	15918512	15919039			AT2G38040:CDS;		-39.5014		hypo
Chr1	2739265	2741554			AT1G08620:CDS;		-39.5392		hypo
Chr4	7214340	7215790			AT4G12040:five_prime_UTR;AT4TE31405:transposable_element;		-39.5542		hypo
Chr1	12449687	12449706			AT1G34180:CDS;		-39.6183		hypo
Chr3	4211156	4213202			AT3G13100:CDS;		-39.669		hypo
Chr1	11106453	11106638			AT1G31120:CDS;		-39.7751		hypo
Chr3	2599091	2599544			AT3G08550:three_prime_UTR;		-39.8511		hypo
Chr1	10681748	10682213			AT1G30320:CDS;		-39.9179		hypo
Chr4	18029776	18031924			AT4G38560:three_prime_UTR;AT4G38570:three_prime_UTR;		-39.9472		hypo
Chr1	5307217	5307899			AT1G15440:CDS;		-39.9681		hypo
Chr5	18989479	18989643			AT5G46800:CDS;		-40.4078		hypo
Chr5	21165317	21165347			NONE		-40.428		hypo
Chr5	15805957	15806752			AT5G39490:CDS;		-40.4993		hypo
Chr3	15807921	15809575			AT3G44035:transposable_element_gene;AT3TE63900:transposable_element;		-40.5537		hypo
Chr1	4369130	4369458			AT1G12820:CDS;		-40.86		hypo
Chr1	23343600	23343625			AT1G63000:CDS;		-40.8771		hypo
Chr5	9779106	9779282			AT5G27630:CDS;		-40.9449		hypo
Chr3	4965033	4969265			AT3G14790:three_prime_UTR;AT3G14800:transposable_element_gene;AT3TE20930:transposable_element;		-41.1338		hypo
Chr4	17603184	17603602			AT4G37440:CDS;		-41.2029		hypo
Chr2	8712318	8715612			AT2G20190:CDS;		-41.2936		hypo
Chr3	20418143	20421939			AT3G55090:CDS;AT3G55100:three_prime_UTR;		-41.4939		hypo
Chr4	317473	319803			AT4G00750:three_prime_UTR;AT4G00752:three_prime_UTR;		-41.5808		hypo
Chr5	15961566	15961863			AT5G39862:transposable_element_gene;AT5TE57635:transposable_element;		-41.6381		hypo
Chr1	7818426	7820720			AT1G22150:CDS;		-41.6488		hypo
Chr4	15866811	15866828			AT4G32880:CDS;		-41.6572		hypo
Chr2	29091	30028			AT2G01029:transposable_element_gene;AT2TE00015:transposable_element;AT2TE00020:transposable_element;		-41.714		hypo
Chr5	3103036	3104660			AT5G09950:CDS;		-41.7163		hypo
Chr5	19767040	19767944			AT5G48740:CDS;		-41.7308		hypo
Chr1	9024689	9026740			AT1G26110:CDS;		-41.7784		hypo
Chr1	4736439	4737492			AT1G13820:CDS;		-41.7977		hypo
Chr5	23811723	23812496			AT5G58980:CDS;		-41.8539		hypo
Chr5	18628898	18629162			AT5G45930:CDS;		-42.0473		hypo
Chr1	18842909	18843981			AT1G50840:CDS;		-42.0562		hypo
Chr1	9296435	9297406			AT1G26830:CDS;		-42.1358		hypo
Chr2	15909192	15912667			AT2G38010:three_prime_UTR;AT2G38020:three_prime_UTR;		-42.1835		hypo
Chr4	9114789	9117692			AT4G16110:three_prime_UTR;AT4G16120:three_prime_UTR;		-42.2353		hypo
Chr2	8572350	8572371			AT2G19860:mRNA;		-42.2497		hypo
Chr1	7485971	7486413			AT1G21380:CDS;		-42.4305		hypo
Chr3	7221741	7222446			AT3G20650:CDS;		-42.5577		hypo
Chr4	6848233	6849070			AT4G11240:three_prime_UTR;		-43.1377		hypo
Chr2	16672974	16674408			AT2G39940:CDS;		-43.1632		hypo
Chr5	1402339	1402381			AT5G04830:CDS;		-43.2154		hypo
Chr1	10857003	10857017			AT1G30620:CDS;		-43.246		hypo
Chr1	21515628	21515871			AT1G58110:three_prime_UTR;		-43.2994		hypo
Chr4	8507994	8508169			AT4G14820:CDS;		-43.3366		hypo
Chr2	9811987	9812308			AT2G23050:CDS;		-43.4492		hypo
Chr1	16751097	16751283			AT1TE55320:transposable_element;AT1TE55325:transposable_element;		-43.5707		hypo
Chr1	24130611	24131342			AT1G64960:CDS;		-43.7366		hypo
Chr2	19671482	19672280			AT2G48100:CDS;		-43.8739		hypo
Chr3	22146469	22146808			AT3G59950:five_prime_UTR;		-44.0127		hypo
Chr5	26400329	26400724			AT5G66010:CDS;		-44.0956		hypo
Chr3	8385090	8386955			AT3G23410:three_prime_UTR;AT3G23420:CDS;		-44.1867		hypo
Chr4	5316049	5316310			AT4G08390:CDS;		-44.1868		hypo
Chr5	6745481	6745808			AT5G19960:CDS;		-44.4187		hypo
Chr1	11757488	11757503			AT1G32510:CDS;		-44.5183		hypo
Chr1	9525125	9526214			AT1G27430:CDS;		-44.6276		hypo
Chr4	7485854	7489197			AT4G12710:five_prime_UTR;AT4G12720:five_prime_UTR;		-44.6458		hypo
Chr3	17235472	17235603			AT3G46800:CDS;		-44.8435		hypo
Chr3	3136738	3138129			AT3G10140:three_prime_UTR;AT3G10150:three_prime_UTR;		-44.8918		hypo
Chr3	4186662	4191610			AT3G13062:three_prime_UTR;AT3G13065:three_prime_UTR,five_prime_UTR;AT3G13070:three_prime_UTR;		-44.9795		hypo
Chr5	6878301	6880647			AT5G20350:CDS;		-45.0405		hypo
Chr5	5296818	5298802			AT5G16210:five_prime_UTR;AT5G16220:three_prime_UTR;		-45.1265		hypo
Chr2	8750500	8750861			AT2G20290:CDS;		-45.1522		hypo
Chr3	9126081	9126116			AT3G25040:three_prime_UTR;		-45.314		hypo
Chr4	7788296	7789948			AT4G13400:CDS;		-45.3292		hypo
Chr5	19086403	19088220			AT5G47020:CDS;		-45.4452		hypo
Chr5	22867166	22867507			AT5G56460:CDS;		-45.461		hypo
Chr4	12103659	12106183			AT4G23100:three_prime_UTR;		-45.6721		hypo
Chr5	1637499	1638311			AT5G05540:three_prime_UTR;		-45.8255		hypo
Chr2	17181418	17183522			AT2G41220:CDS;		-45.9243		hypo
Chr1	20417328	20417855			AT1G54700:three_prime_UTR;AT1G54710:CDS;		-46.0142		hypo
Chr2	11127970	11128251			AT2G26130:CDS;		-46.205		hypo
Chr2	13444663	13444676			AT2G31580:CDS;		-46.2237		hypo
Chr4	1193226	1194504			AT4G02700:three_prime_UTR;AT4G02710:CDS;		-46.3072		hypo
Chr2	15637434	15638754			AT2G37230:CDS;		-46.3166		hypo
Chr2	16520140	16520504			AT2G39620:CDS;		-46.3281		hypo
Chr2	7613531	7614134			AT2G17510:CDS;		-46.461		hypo
Chr2	11782683	11782973			AT2G27600:CDS;		-46.5705		hypo
Chr3	13487531	13487691			AT3G32920:mRNA;AT3G32925:transposable_element_gene;AT3TE54905:transposable_element;		-46.8559		hypo
Chr3	1659332	1662803			AT3G05675:five_prime_UTR;AT3G05680:three_prime_UTR;		-47.0997		hypo
Chr2	19067509	19068341			AT2G46450:CDS;		-47.1425		hypo
Chr2	17802373	17804239			AT2G42780:three_prime_UTR;AT2G42790:three_prime_UTR;		-47.2328		hypo
Chr1	13006213	13007444			AT1G35380:transposable_element_gene;AT1TE42400:transposable_element;		-47.3718		hypo
Chr2	1121694	1122356			AT2G03680:three_prime_UTR;AT2G03690:three_prime_UTR;		-47.4891		hypo
Chr4	13592920	13593474			AT4G27080:three_prime_UTR;		-47.5988		hypo
Chr4	15166586	15167063			AT4G31210:CDS;		-47.7403		hypo
Chr3	2443637	2443949			AT3G07650:three_prime_UTR;		-48.1056		hypo
Chr4	9524429	9525035			AT4G16920:CDS;		-48.3185		hypo
Chr2	17174180	17175752			AT2G41210:CDS;		-48.3904		hypo
Chr3	1274605	1275379			AT3G04690:CDS;		-48.4138		hypo
Chr4	9647515	9647545			AT4G17180:CDS;		-48.9007		hypo
Chr3	2941521	2941759			AT3G09570:CDS;		-49.0527		hypo
Chr3	16491671	16492112			AT3G45090:CDS;		-49.229		hypo
Chr3	548323	548497			AT3G02580:CDS;		-49.6141		hypo
Chr3	14733872	14735473			AT3G42645:transposable_element_gene;AT3G42646:pseudogene;		-49.7816		hypo
Chr2	19618443	19620346			AT2G47940:CDS;		-49.8763		hypo
Chr3	8371224	8371936			NONE		-49.9922		hypo
Chr4	8104037	8104485			AT4G14050:CDS;		-50.7385		hypo
Chr5	933493	937027			AT5G03650:CDS;		-50.7669		hypo
Chr5	8304703	8306075			AT5G24350:CDS;		-51.7706		hypo
Chr1	6548576	6551471			AT1G18950:CDS;		-52.542		hypo
Chr1	25511853	25512219			AT1G68060:CDS;		-52.9196		hypo
Chr4	11017969	11019497			AT4G20430:CDS;		-54.7213		hypo
Chr4	5737926	5737969			AT4TE24060:transposable_element;		-63.1428		hypo
Chr5			5132156	5132491		AT5G15730:CDS;		74.1259		hyper
Chr1			7254810	7254815		AT1G20860:CDS;		73.8018		hyper
Chr3			22868655	22870007		AT3G61780:CDS;		68.8663		hyper
Chr1			6155028	6155063		AT1G17890:CDS;		67.9898		hyper
Chr3			11451339	11453335		AT3G29633:CDS;AT3TE47740:transposable_element;		65.5946		hyper
Chr4			6372013	6372029		AT4G10260:CDS;		65.5217		hyper
Chr1			2098776	2099471		AT1G06840:CDS;		65.2552		hyper
Chr5			6854331	6854464		AT5G20300:CDS;		64.7137		hyper
Chr3			6607609	6608738		AT3G19100:CDS;		63.2071		hyper
Chr3			37244	39719		AT3G01100:five_prime_UTR;AT3G01120:three_prime_UTR;		60.3703		hyper
Chr5			1941849	1943589		AT5G06350:CDS;		60.1726		hyper
Chr4			13313989	13314168		AT4G26310:three_prime_UTR;		58.819		hyper
Chr1			19296619	19297186		AT1G51940:CDS;		58.7895		hyper
Chr3			2246366	2246858		AT3G07100:CDS;		58.7497		hyper
Chr1			26919544	26919561		AT1G71420:CDS;		58.5842		hyper
Chr3			7484949	7487533		AT3G21290:CDS;		58.3788		hyper
Chr3			21385772	21385792		AT3G57700:CDS;AT3G57710:three_prime_UTR;		57.3741		hyper
Chr5			14620880	14621661		AT5G37010:CDS;		57.3628		hyper
Chr2			10844903	10844954		AT2G25480:CDS;		57.1309		hyper
Chr3			22034596	22034815		AT3G59660:CDS;		57.0402		hyper
Chr3			7117498	7117742		AT3G20410:CDS;		56.8566		hyper
Chr4			13568961	13569796		AT4G27020:CDS;		56.7364		hyper
Chr4			15997116	15997227		AT4G33170:CDS;		56.3479		hyper
Chr4			12049251	12050201		AT4G22990:CDS;		56.3248		hyper
Chr4			4973571	4973854		AT4G08090:transposable_element_gene;AT4TE20760:transposable_element;		56.2543		hyper
Chr2			1619195	1619207		AT2G04630:CDS;		56.0548		hyper
Chr4			14067419	14068354		AT4G28470:CDS;		55.8865		hyper
Chr3			5673586	5675098		AT3G16650:CDS;		55.5125		hyper
Chr4			978007	978165		AT4G02220:CDS;		55.4475		hyper
Chr1			17460805	17463609		AT1G47550:CDS;		55.0554		hyper
Chr4			18277633	18277643		AT4G39270:CDS;		54.817		hyper
Chr4			23880	24600		AT4G00060:CDS;		54.6873		hyper
Chr4			3033572	3034380		AT4TE14070:transposable_element;		54.6041		hyper
Chr5			3146361	3146911		AT5G10060:CDS;		54.3307		hyper
Chr1			13506359	13508571		AT1G36110:transposable_element_gene;AT1TE44215:transposable_element;AT1TE44220:transposable_element;AT1TE44225:transposable_element;AT1TE44230:transposable_element;		54.0306		hyper
Chr4			9064212	9064250		AT4G16000:CDS;		53.8605		hyper
Chr3			7041322	7041348		AT3TE29575:transposable_element;		53.8136		hyper
Chr5			13933740	13933766		NONE		53.7023		hyper
Chr1			16466647	16466771		NONE		53.7014		hyper
Chr5			16104538	16104760		AT5G40280:CDS;		53.6809		hyper
Chr3			8643687	8644031		AT3G23920:CDS;		53.6752		hyper
Chr2			1622675	1623320		AT2G04650:CDS;		53.6101		hyper
Chr2			17875993	17876013		AT2G42980:CDS;		53.5783		hyper
Chr3			19118515	19119482		AT3G51550:CDS;		53.4457		hyper
Chr5			25834272	25834988		AT5G64630:CDS;		53.1808		hyper
Chr2			10365803	10365808		AT2G24360:CDS;		53.1293		hyper
Chr1			24953859	24954043		AT1G66880:CDS;		53.0943		hyper
Chr5			10929739	10929753		AT5G28900:CDS;		53.0936		hyper
Chr2			10923218	10925763		AT2G25660:CDS;		52.9618		hyper
Chr3			6753811	6754533		AT3G19480:CDS;		52.6154		hyper
Chr5			25575473	25576167		AT5G63920:CDS;		52.3068		hyper
Chr4			7740852	7741606		AT4G13290:CDS;		52.2874		hyper
Chr5			16807831	16808447		AT5G42020:CDS;		52.037		hyper
Chr1			20299960	20302348		AT1G54380:five_prime_UTR;AT1G54385:three_prime_UTR;		51.7104		hyper
Chr1			5721033	5721500		AT1G16710:CDS;		51.5756		hyper
Chr5			19462847	19462872		AT5G48020:three_prime_UTR;		51.5413		hyper
Chr1			22243592	22243603		AT1G60360:CDS;		51.407		hyper
Chr1			11613649	11614687		AT1G32230:CDS;		51.3867		hyper
Chr3			10635588	10635604		AT3TE44210:transposable_element;		51.0735		hyper
Chr2			8250010	8251845		AT2G19040:CDS;AT2G19045:CDS;		51.0336		hyper
Chr1			11449435	11449439		AT1G31880:CDS;		50.9907		hyper
Chr3			12720814	12723081		AT3G31359:transposable_element_gene;AT3TE52365:transposable_element;AT3TE52370:transposable_element;		50.9013		hyper
Chr4			7264653	7265094		AT4G12130:CDS;		50.8388		hyper
Chr4			17195415	17195935		AT4G36390:CDS;		50.6586		hyper
Chr1			8735599	8738059		AT1G24650:CDS;AT1G24657:pseudogene;		50.4889		hyper
Chr1			7148658	7149140		AT1G20630:CDS;		50.4284		hyper
Chr3			18359803	18359809		AT3G49520:CDS;		50.3483		hyper
Chr3			14645166	14647609		AT3G42540:transposable_element_gene;AT3TE59895:transposable_element;AT3TE59900:transposable_element;AT3TE59905:transposable_element;AT3TE59910:transposable_element;		50.2195		hyper
Chr2			13693948	13696602		AT2G32250:CDS;		50.1487		hyper
Chr2			16447977	16448498		AT2G39380:CDS;		49.9755		hyper
Chr1			992652	994482		AT1G03900:three_prime_UTR;AT1G03905:five_prime_UTR;		49.9492		hyper
Chr1			21249211	21249695		AT1TE70195:transposable_element;AT1TE70200:transposable_element;		49.9351		hyper
Chr1			20370185	20371761		AT1G54550:three_prime_UTR;AT1G54560:CDS;		49.8418		hyper
Chr2			16002105	16002484		AT2G38185:CDS;AT2G38195:five_prime_UTR;		49.6608		hyper
Chr1			29293414	29293790		AT1G77890:CDS;		49.6392		hyper
Chr3			10437101	10437277		AT3G28040:CDS;		49.6344		hyper
Chr5			21744479	21744485		AT5G53520:CDS;		49.3972		hyper
Chr3			21667034	21667454		AT3G58590:CDS;		49.3195		hyper
Chr3			5210193	5210732		AT3G15430:CDS;		49.0072		hyper
Chr4			2317085	2317137		NONE		48.8544		hyper
Chr2			12794109	12794434		AT2G29990:CDS;		48.8449		hyper
Chr1			25468928	25469668		AT1G67900:CDS;		48.5616		hyper
Chr2			11715642	11715734		AT2G27380:CDS;		48.526		hyper
Chr2			91154	93460		AT2G01130:CDS;		48.4753		hyper
Chr5			1505888	1505943		AT5G05100:CDS;		48.4718		hyper
Chr5			15600333	15600523		NONE		48.4677		hyper
Chr1			29460830	29461057		NONE		48.4454		hyper
Chr5			18260118	18260195		AT5TE65710:transposable_element;		48.4319		hyper
Chr3			19188246	19188417		AT3G51730:CDS;		48.4047		hyper
Chr2			18512530	18514136		AT2G44900:CDS;		48.3004		hyper
Chr5			6789307	6789400		NONE		48.2376		hyper
Chr3			3195939	3196389		AT3G10320:CDS;		48.186		hyper
Chr3			17325106	17325416		AT3G47040:CDS;		48.087		hyper
Chr5			20933013	20933672		AT5G51540:CDS;		47.8829		hyper
Chr5			23540298	23540491		AT5G58170:CDS;		47.8523		hyper
Chr1			18382424	18385364		AT1G49670:CDS;		47.8242		hyper
Chr1			4399273	4399961		AT1G12930:CDS;		47.702		hyper
Chr5			20126421	20126563		AT5G49580:CDS;		47.6577		hyper
Chr3			7311143	7311314		AT3G20870:CDS;		47.5881		hyper
Chr4			13041262	13044661		AT4G25530:three_prime_UTR;AT4G25540:three_prime_UTR;		47.5522		hyper
Chr5			20445408	20445419		AT5G50210:CDS;		47.5		hyper
Chr5			19318813	19320074		AT5G47690:CDS;		47.4428		hyper
Chr3			11097328	11097345		AT3TE46170:transposable_element;		47.3852		hyper
Chr5			13234424	13237446		AT5G34930:three_prime_UTR;AT5G34940:three_prime_UTR;		47.3549		hyper
Chr2			1870767	1870865		AT2G05170:CDS;		47.2652		hyper
Chr5			11736792	11737774		NONE		47.09		hyper
Chr1			24850165	24850169		AT1G66610:three_prime_UTR;		47.0755		hyper
Chr1			5108287	5109815		AT1G14830:CDS;		47.0599		hyper
Chr4			1360716	1360858		AT4G03080:CDS;		46.8931		hyper
Chr3			21512591	21512800		AT3G58090:CDS;		46.8533		hyper
Chr3			4643823	4646443		AT3G14020:CDS;AT3G14025:pseudogene;AT3G14030:CDS;		46.8319		hyper
Chr4			10027939	10028674		AT4G18060:CDS;		46.7989		hyper
Chr1			24161369	24161695		AT1G65040:CDS;		46.6183		hyper
Chr2			10960460	10964006		AT2G25730:CDS;		46.6122		hyper
Chr5			19620750	19623126		AT5G48410:CDS;		46.5936		hyper
Chr1			24614228	24614314		AT1G66120:CDS;		46.5544		hyper
Chr3			22801660	22801841		AT3G61620:CDS;		46.4768		hyper
Chr5			7126718	7126968		AT5G20980:CDS;		46.4468		hyper
Chr1			765845	765873		AT1G03160:three_prime_UTR;		46.4095		hyper
Chr5			9152884	9153055		AT5G26180:three_prime_UTR;		46.3773		hyper
Chr1			27121512	27121642		AT1G72080:CDS;		46.3434		hyper
Chr2			4200529	4201673		AT2G10680:transposable_element_gene;AT2TE17725:transposable_element;		46.3291		hyper
Chr1			2537602	2537726		AT1G08110:three_prime_UTR;		46.2798		hyper
Chr5			61567	61571		AT5G01180:CDS;		46.2768		hyper
Chr4			681540	681543		AT4G01570:CDS;		46.1257		hyper
Chr1			24454823	24454839		AT1G65750:transposable_element_gene;AT1TE80320:transposable_element;		45.9867		hyper
Chr4			10816175	10816675		AT4G19960:CDS;		45.7723		hyper
Chr1			4819065	4819457		AT1G14070:CDS;		45.6912		hyper
Chr3			20168756	20172477		AT3G54470:five_prime_UTR;AT3G54480:three_prime_UTR;		45.5808		hyper
Chr5			23081889	23083239		AT5G57035:CDS;		45.5321		hyper
Chr3			2655017	2655073		AT3G08740:CDS;		45.5082		hyper
Chr4			2558003	2558007		NONE		45.4509		hyper
Chr1			197236	197814		AT1G01540:CDS;		45.3765		hyper
Chr4			15936604	15937333		AT4G33030:CDS;		45.2634		hyper
Chr2			8393061	8393790		AT2G19390:CDS;		45.1946		hyper
Chr5			23620677	23622089		AT5G58420:three_prime_UTR;AT5G58430:three_prime_UTR;		45.1804		hyper
Chr1			21194279	21196746		AT1G56560:three_prime_UTR;AT1G56570:CDS;		45.1343		hyper
Chr5			6965534	6967054		AT5G20590:three_prime_UTR;AT5G20600:three_prime_UTR;		45.104		hyper
Chr2			9690179	9691084		AT2G22780:CDS;		44.979		hyper
Chr4			13327289	13327371		AT4G26350:CDS;		44.8298		hyper
Chr1			6163742	6163885		AT1G17920:CDS;		44.8196		hyper
Chr5			24924474	24925149		AT5G62050:CDS;		44.8177		hyper
Chr4			16086982	16087402		AT4G33430:CDS;		44.7849		hyper
Chr5			9501137	9503466		AT5G27000:three_prime_UTR;AT5G27010:CDS;		44.7825		hyper
Chr5			1947429	1947548		AT5G06370:CDS;		44.7454		hyper
Chr2			11812961	11813006		NONE		44.6662		hyper
Chr5			4101025	4101038		AT5G12960:CDS;		44.5677		hyper
Chr2			9352219	9352527		AT2G21940:CDS;		44.5596		hyper
Chr5			3804318	3805876		AT5G11800:CDS;		44.5268		hyper
Chr5			7857430	7857576		AT5G23340:CDS;		44.3928		hyper
Chr4			710121	710964		AT4G01660:CDS;		44.3517		hyper
Chr5			25272617	25273524		AT5G62970:CDS;		44.2234		hyper
Chr1			15978636	15979125		AT1G42550:CDS;		44.2158		hyper
Chr4			16447556	16447581		AT4G34400:CDS;		44.2009		hyper
Chr3			3559085	3559303		AT3G11350:CDS;		44.1737		hyper
Chr3			21984936	21989426		AT3G59490:five_prime_UTR;AT3G59500:three_prime_UTR,five_prime_UTR;AT3G59510:CDS;		44.1332		hyper
Chr5			8183562	8183819		AT5G24160:CDS;		43.927		hyper
Chr2			19386115	19386256		AT2G47220:CDS;		43.8406		hyper
Chr4			10205362	10207424		AT4G18490:CDS;		43.8021		hyper
Chr3			7238165	7238409		AT3G20710:CDS;		43.7943		hyper
Chr5			7391236	7391414		AT5G22330:CDS;		43.6869		hyper
Chr5			15098373	15098435		NONE		43.6284		hyper
Chr3			11121891	11121999		AT3TE46250:transposable_element;		43.5833		hyper
Chr2			14205885	14206760		AT2G33540:CDS;		43.5206		hyper
Chr4			13548130	13551634		AT4G26970:three_prime_UTR;AT4G26980:three_prime_UTR,five_prime_UTR;AT4G26990:three_prime_UTR;		43.5074		hyper
Chr3			5450638	5451246		AT3G16060:three_prime_UTR;		43.4897		hyper
Chr1			17153878	17157821		AT1G45229:three_prime_UTR;AT1G45233:three_prime_UTR;AT1G45234:tRNA;AT1G45236:tRNA;		43.4286		hyper
Chr5			15405460	15406768		AT5G38470:CDS;		43.4227		hyper
Chr3			7333501	7335527		AT3G20930:three_prime_UTR;AT3G20935:CDS;		43.4106		hyper
Chr5			9466532	9468145		AT5G26910:three_prime_UTR;		43.3964		hyper
Chr1			20983774	20985726		AT1G56100:five_prime_UTR;AT1G56110:three_prime_UTR;AT1TE69295:transposable_element;		43.3281		hyper
Chr3			16370962	16375172		AT3G44830:CDS;AT3G44840:CDS;AT3G44850:CDS;		43.2468		hyper
Chr4			14972149	14974451		AT4G30720:three_prime_UTR;		43.2358		hyper
Chr2			17537228	17540218		AT2G42010:five_prime_UTR;AT2G42020:tRNA;AT2G42030:three_prime_UTR;		43.2347		hyper
Chr5			15239665	15240281		AT5G38192:transposable_element_gene;AT5TE55145:transposable_element;		43.0989		hyper
Chr5			4468977	4469580		AT5G13840:CDS;		43.0919		hyper
Chr5			6648488	6648749		AT5G19670:CDS;		43.0615		hyper
Chr5			18796646	18797984		AT5G46340:CDS;		43.061		hyper
Chr4			3500562	3501117		AT4G06565:transposable_element_gene;AT4TE15820:transposable_element;		43.0435		hyper
Chr5			6990517	6990671		AT5G20660:CDS;		43.0081		hyper
Chr2			10982491	10982526		AT2G25740:CDS;		42.9334		hyper
Chr2			15294540	15294574		AT2G36450:CDS;		42.9198		hyper
Chr2			18861757	18862580		AT2G45810:three_prime_UTR;		42.9055		hyper
Chr2			8287066	8287091		AT2G19120:CDS;		42.7901		hyper
Chr3			22572528	22572939		AT3G61010:CDS;		42.7844		hyper
Chr1			22263581	22264102		AT1G60420:CDS;		42.6218		hyper
Chr1			4200011	4204721		AT1G12350:three_prime_UTR;AT1G12360:five_prime_UTR;		42.5895		hyper
Chr5			24927916	24930091		AT5G62060:CDS;AT5G62065:CDS;AT5G62070:three_prime_UTR;		42.5827		hyper
Chr5			18469044	18469568		AT5G45560:CDS;		42.4649		hyper
Chr4			14467548	14467604		AT4G29400:CDS;		42.3994		hyper
Chr5			11765838	11765854		AT5G31909:pseudogene;		42.3373		hyper
Chr3			5724313	5726512		AT3G16810:CDS;		42.2624		hyper
Chr5			857620	859722		AT5G03440:five_prime_UTR;AT5G03445:tRNA;AT5G03450:three_prime_UTR;		42.2435		hyper
Chr1			16425746	16427991		AT1G43620:CDS;		42.2326		hyper
Chr5			12550261	12551170		AT5G33280:CDS;		42.2244		hyper
Chr5			19936944	19937872		AT5G49160:CDS;		42.0973		hyper
Chr1			17470245	17472533		AT1G47560:CDS;		42.0521		hyper
Chr5			20843327	20843551		AT5G51280:CDS;		41.9207		hyper
Chr3			22431381	22431680		AT3G60680:CDS;		41.916		hyper
Chr1			5838682	5839914		AT1G17070:CDS;		41.9092		hyper
Chr4			15029731	15033282		AT4G30870:three_prime_UTR;AT4G30872:ncRNA;		41.8958		hyper
Chr5			26755346	26755561		AT5G67030:CDS;		41.8075		hyper
Chr4			7797649	7798180		AT4G13420:CDS;		41.8048		hyper
Chr1			4723288	4725406		AT1G13770:three_prime_UTR;AT1G13780:five_prime_UTR;		41.7999		hyper
Chr5			798242	798903		AT5G03300:CDS;		41.7562		hyper
Chr1			20341262	20342268		AT1G54460:CDS;		41.7543		hyper
Chr1			7644554	7644610		AT1G21740:CDS;		41.5365		hyper
Chr3			5986750	5987189		AT3G17500:CDS;		41.4996		hyper
Chr1			17066499	17068740		AT1G45130:CDS;		41.4085		hyper
Chr1			1955765	1956711		AT1G06410:CDS;		41.4039		hyper
Chr3			5968569	5968954		AT3G17430:CDS;		41.3677		hyper
Chr2			8312733	8314732		AT2G19160:three_prime_UTR;AT2G19170:three_prime_UTR;		41.3297		hyper
Chr5			23906153	23906498		AT5G59250:CDS;		41.2722		hyper
Chr1			9496886	9497492		AT1G27340:CDS;		41.2275		hyper
Chr1			12313438	12314914		AT1G33900:CDS;AT1G33910:CDS;		41.175		hyper
Chr3			22093677	22099729		AT3G59790:CDS;AT3G59800:three_prime_UTR,five_prime_UTR;AT3G59810:three_prime_UTR,five_prime_UTR;AT3G59820:three_prime_UTR;		41.1515		hyper
Chr5			20352983	20353977		AT5G50020:CDS;		41.1283		hyper
Chr1			18417745	18419387		AT1G49760:CDS;		41.112		hyper
Chr5			22035841	22036395		AT5G54260:CDS;		41.0328		hyper
Chr4			6144433	6144694		AT4G09740:CDS;		41.0325		hyper
Chr1			6676660	6676668		AT1G19310:CDS;		41.0298		hyper
Chr5			21209071	21209997		AT5G52230:CDS;		40.9997		hyper
Chr3			18921525	18921930		AT3G50910:CDS;		40.9641		hyper
Chr4			17360750	17360769		AT4G36860:CDS;		40.9506		hyper
Chr1			4345788	4346008		AT1G12750:CDS;		40.9484		hyper
Chr2			8807127	8807207		AT2G20420:CDS;		40.9135		hyper
Chr1			7273714	7273740		AT1G20900:CDS;		40.8829		hyper
Chr1			10493704	10494231		AT1G29950:three_prime_UTR;AT1G29951:three_prime_UTR;AT1G29952:three_prime_UTR;		40.8562		hyper
Chr3			19035515	19036085		AT3G51270:CDS;		40.8095		hyper
Chr3			8469039	8472766		AT3G23590:CDS;		40.7974		hyper
Chr1			16192107	16193144		AT1G43060:transposable_element_gene;AT1TE53375:transposable_element;		40.7431		hyper
Chr2			5512300	5512819		AT2G13290:CDS;		40.6435		hyper
Chr5			9419413	9420101		AT5G26780:CDS;		40.6217		hyper
Chr4			14139923	14139946		AT4G28630:CDS;		40.6193		hyper
Chr3			1022870	1022940		AT3G03950:CDS;		40.6179		hyper
Chr5			8140829	8140854		AT5G24080:CDS;		40.4819		hyper
Chr4			5411869	5413615		AT4G08510:three_prime_UTR;AT4TE22600:transposable_element;		40.4777		hyper
Chr3			12584764	12586545		AT3G30838:transposable_element_gene;AT3TE51820:transposable_element;AT3TE51825:transposable_element;		40.4216		hyper
Chr3			21308131	21308343		AT3G57550:CDS;		40.3666		hyper
Chr3			17257478	17258212		AT3G46850:CDS;		40.2835		hyper
Chr3			17799742	17800070		AT3G48190:CDS;		40.237		hyper
Chr5			2413442	2413785		AT5G07630:CDS;		40.1738		hyper
Chr1			25303514	25304966		AT1G67520:CDS;		40.1194		hyper
Chr3			18118716	18120107		AT3G48860:CDS;		40.0945		hyper
Chr3			2133723	2135467		AT3G06760:three_prime_UTR;AT3G06770:three_prime_UTR;		40.0129		hyper
Chr4			17940176	17940706		AT4G38270:CDS;		40.006		hyper
Chr5			21929358	21929684		AT5G54040:CDS;		39.947		hyper
Chr4			6368318	6368331		AT4G10201:pseudogene;		39.9301		hyper
Chr4			17786053	17786750		AT4G37820:CDS;AT4TE85940:transposable_element;		39.9211		hyper
Chr2			12301246	12301254		AT2G28670:five_prime_UTR;AT2G28671:CDS;		39.8534		hyper
Chr1			26193996	26194638		AT1G69640:CDS;		39.8298		hyper
Chr4			2188830	2190178		AT4G04410:transposable_element_gene;AT4TE10320:transposable_element;		39.8272		hyper
Chr1			16387204	16387227		AT1TE53995:transposable_element;		39.8128		hyper
Chr4			17894541	17894546		AT4G38120:CDS;		39.8005		hyper
Chr5			2660093	2660236		AT5G08260:CDS;		39.7971		hyper
Chr2			12656577	12656701		AT2G29600:CDS;		39.7738		hyper
Chr5			15474375	15474735		AT5G38660:CDS;		39.7736		hyper
Chr4			12715849	12716782		AT4G24630:CDS;		39.7579		hyper
Chr1			18988886	18988909		AT1G51210:CDS;		39.7151		hyper
Chr2			9286259	9287684		AT2G21770:CDS;		39.6998		hyper
Chr5			9157724	9157915		AT5G26200:CDS;		39.6964		hyper
Chr2			8498387	8498422		AT2G19660:CDS;		39.6882		hyper
Chr5			662913	666117		AT5G02880:CDS;		39.6796		hyper
Chr4			15177139	15177161		AT4G31240:CDS;		39.6736		hyper
Chr1			14310297	14310421		NONE		39.6545		hyper
Chr5			25917335	25917739		AT5G64840:CDS;		39.6249		hyper
Chr5			16340625	16340948		AT5G40810:five_prime_UTR;		39.6137		hyper
Chr3			9355671	9356858		AT3G25690:CDS;		39.5116		hyper
Chr1			16795648	16797953		AT1G44160:three_prime_UTR;AT1G44170:three_prime_UTR;		39.4922		hyper
Chr2			10060843	10060971		AT2G23660:CDS;		39.4538		hyper
Chr3			3990021	3990517		AT3G12570:CDS;		39.3408		hyper
Chr1			27718202	27718208		AT1G73700:CDS;		39.3013		hyper
Chr5			3425220	3426249		AT5G10840:CDS;		39.261		hyper
Chr1			8591422	8592275		AT1G24256:CDS;		39.2163		hyper
Chr5			24441088	24441473		AT5G60760:CDS;		39.2115		hyper
Chr1			24714821	24714869		AT1G66290:CDS;		39.1275		hyper
Chr1			2297027	2297615		AT1G07480:CDS;		39.0794		hyper
Chr3			15813726	15815016		AT3G44042:transposable_element_gene;AT3TE63935:transposable_element;AT3TE63940:transposable_element;AT3TE63945:transposable_element;AT3TE63950:transposable_element;AT3TE63955:transposable_element;		39.0698		hyper
Chr2			8190549	8191805		AT2G18900:CDS;		39.0377		hyper
Chr1			30163846	30164543		AT1G80210:CDS;		39.0256		hyper
Chr2			16085084	16087017		AT2G38400:three_prime_UTR;AT2G38410:three_prime_UTR;		38.9986		hyper
Chr5			1701272	1701922		AT5G05680:CDS;		38.9851		hyper
Chr3			1194545	1195413		AT3G04480:CDS;		38.9649		hyper
Chr1			21900501	21900750		AT1G59610:CDS;		38.9533		hyper
Chr4			14977411	14979720		AT4G30740:CDS;AT4TE71140:transposable_element;		38.8863		hyper
Chr5			25965269	25968141		AT5G65000:three_prime_UTR,five_prime_UTR;AT5G65005:CDS;		38.8039		hyper
Chr5			702422	702494		AT5G02990:CDS;		38.747		hyper
Chr2			18835701	18835757		AT2G45720:CDS;		38.7468		hyper
Chr3			21189296	21191607		AT3G57260:five_prime_UTR;AT3G57270:three_prime_UTR;		38.732		hyper
Chr5			5536938	5537867		AT5G16840:CDS;		38.7275		hyper
Chr3			14042766	14042958		AT3G33595:transposable_element_gene;AT3TE57600:transposable_element;AT3TE57605:transposable_element;		38.7159		hyper
Chr1			21940583	21940588		AT1G59720:CDS;		38.6923		hyper
Chr1			23237592	23238300		AT1G62760:CDS;AT1TE76610:transposable_element;		38.6089		hyper
Chr2			3025637	3026522		AT2G07280:CDS;AT2TE13170:transposable_element;AT2TE13175:transposable_element;AT2TE13180:transposable_element;		38.5831		hyper
Chr1			1090633	1092882		AT1G04160:CDS;		38.5653		hyper
Chr2			12406053	12406570		AT2G28890:CDS;		38.5295		hyper
Chr5			18065275	18065650		AT5G44770:CDS;		38.4937		hyper
Chr3			2064359	2065852		AT3G06620:CDS;		38.4324		hyper
Chr5			1463585	1463602		AT5G04960:CDS;		38.37		hyper
Chr3			9687368	9688747		AT3G26470:three_prime_UTR;AT3G26480:CDS;		38.3286		hyper
Chr2			12009902	12011180		AT2G28170:CDS;AT2G28180:CDS;		38.2536		hyper
Chr3			12701126	12701132		NONE		38.0676		hyper
Chr3			20777312	20778079		AT3G55980:CDS;		38.0662		hyper
Chr1			3292469	3295221		AT1G10090:CDS;		38.0221		hyper
Chr5			14244218	14245362		AT5G36200:CDS;		38.0085		hyper
Chr3			9147405	9150032		AT3G25110:five_prime_UTR;AT3G25120:three_prime_UTR;		38.0075		hyper
Chr3			2834818	2836036		AT3G09230:three_prime_UTR;AT3G09240:CDS;		38.0047		hyper
Chr5			6501667	6502173		AT5G19310:CDS;		37.9866		hyper
Chr5			18153948	18153952		AT5G44960:CDS;		37.9217		hyper
Chr4			9255628	9255677		AT4G16380:CDS;		37.9125		hyper
Chr1			4156731	4156864		AT1G12240:CDS;		37.9011		hyper
Chr1			15815228	15815418		AT1G42350:transposable_element_gene;		37.8947		hyper
Chr1			20057801	20059286		AT1G53720:CDS;		37.8778		hyper
Chr5			4161286	4163488		AT5G13110:three_prime_UTR;AT5G13120:three_prime_UTR;		37.8163		hyper
Chr1			17850712	17852879		AT1G48310:CDS;		37.7396		hyper
Chr5			25615593	25617197		AT5G63990:three_prime_UTR;AT5G64000:five_prime_UTR;		37.738		hyper
Chr2			10819639	10819677		AT2G25420:CDS;		37.6321		hyper
Chr3			5522128	5524145		AT3G16290:CDS;AT3TE23210:transposable_element;		37.6235		hyper
Chr1			15548667	15549759		AT1G41790:transposable_element_gene;AT1TE51175:transposable_element;AT1TE51180:transposable_element;		37.6126		hyper
Chr1			2161446	2161492		AT1G07040:CDS;		37.5776		hyper
Chr1			22600825	22602020		AT1G61270:CDS;		37.5		hyper
Chr4			2534445	2534930		AT4G04960:CDS;		37.4879		hyper
Chr1			11954288	11954329		AT1G32980:CDS;		37.4687		hyper
Chr4			6748997	6749013		AT4G11050:mRNA;		37.4661		hyper
Chr1			17321413	17324598		AT1G47260:five_prime_UTR;AT1G47265:five_prime_UTR;AT1TE57410:transposable_element;		37.3792		hyper
Chr4			4683740	4683826		AT4TE19675:transposable_element;		37.3584		hyper
Chr5			14758372	14758424		AT5G37270:CDS;		37.3345		hyper
Chr3			17637416	17637431		AT3G47810:CDS;		37.3333		hyper
Chr4			12735852	12739473		AT4G24680:CDS;		37.266		hyper
Chr3			20090887	20091063		NONE		37.2413		hyper
Chr5			19884176	19884210		AT5G49050:CDS;		37.2298		hyper
Chr5			9587561	9587710		AT5G27230:CDS;		37.2095		hyper
Chr4			2633709	2634128		AT4G05120:CDS;		37.1798		hyper
Chr2			15068617	15070603		AT2G35890:CDS;AT2G35900:three_prime_UTR;		37.1508		hyper
Chr1			14485065	14485127		AT1TE47715:transposable_element;		37.1225		hyper
Chr3			17938819	17940365		AT3G48430:CDS;		37.1199		hyper
Chr3			11128902	11130783		AT3G29160:three_prime_UTR;		37.0879		hyper
Chr5			9244213	9244527		AT5G26340:CDS;		37.0575		hyper
Chr4			9722752	9723146		AT4G17420:CDS;		37.0302		hyper
Chr5			15585517	15587394		AT5G38930:CDS;AT5TE56370:transposable_element;		37.0133		hyper
Chr3			16255113	16255121		AT3TE65855:transposable_element;		36.9899		hyper
Chr3			7902265	7902480		AT3G22350:CDS;		36.9227		hyper
Chr1			12765192	12765272		AT1G34790:CDS;		36.9078		hyper
Chr1			29193419	29194791		AT1G77680:CDS;		36.8736		hyper
Chr1			3567279	3569240		AT1G10730:CDS;AT1G10740:three_prime_UTR;		36.8345		hyper
Chr5			8158512	8159508		AT5G24120:CDS;		36.8259		hyper
Chr5			20652519	20654589		AT5G50780:CDS;		36.8121		hyper
Chr5			9109405	9109438		AT5G26090:CDS;		36.728		hyper
Chr4			3793262	3793691		AT4G06642:transposable_element_gene;AT4TE16725:transposable_element;		36.7193		hyper
Chr1			10215796	10216161		AT1G29230:CDS;		36.6996		hyper
Chr2			192495	195439		AT2G01440:three_prime_UTR;AT2TE00730:transposable_element;AT2TE00735:transposable_element;		36.6589		hyper
Chr5			4452410	4453235		AT5G13800:CDS;		36.5748		hyper
Chr3			18042895	18043232		AT3G48710:CDS;		36.5272		hyper
Chr4			2031525	2031546		AT4G04210:CDS;		36.4416		hyper
ChrM			24937	25667		geneinfo		36.4189		hyper
Chr3			16653084	16655419		AT3G45400:three_prime_UTR;AT3G45410:three_prime_UTR;		36.3983		hyper
Chr3			19838453	19839287		AT3G53510:CDS;		36.364		hyper
Chr5			13114525	13118663		AT5G34854:transposable_element_gene;AT5TE46665:transposable_element;AT5TE46670:transposable_element;AT5TE46675:transposable_element;AT5TE46680:transposable_element;AT5TE46685:transposable_element;AT5TE46690:transposable_element;		36.3618		hyper
Chr1			19275386	19276997		AT1G51890:CDS;		36.3404		hyper
Chr1			9138887	9141931		AT1G26410:five_prime_UTR;AT1G26420:three_prime_UTR;		36.2707		hyper
Chr5			1724226	1724717		AT5G05740:CDS;		36.2197		hyper
Chr2			12637262	12637677		AT2G29510:CDS;		36.1978		hyper
Chr2			17476116	17476148		AT2G41880:CDS;		36.1884		hyper
Chr1			16482012	16482499		AT1G43690:CDS;		36.1505		hyper
Chr3			10317148	10317416		AT3G27820:CDS;		36.0811		hyper
Chr4			354521	354836		AT4G00830:CDS;		36.0545		hyper
Chr1			8950666	8956735		AT1G25480:CDS;AT1G25490:three_prime_UTR,five_prime_UTR;AT1G25500:three_prime_UTR;		36.0191		hyper
Chr4			17745484	17745947		AT4G37760:CDS;		36.0001		hyper
Chr4			11250669	11252481		AT4G21070:CDS;		35.9969		hyper
Chr3			20696637	20696823		AT3G55740:CDS;		35.9889		hyper
Chr2			15258833	15263049		AT2G36380:CDS;		35.8857		hyper
Chr3			11427349	11427828		AT3TE47620:transposable_element;		35.8856		hyper
Chr3			16513294	16515312		AT3G45130:CDS;		35.8674		hyper
Chr3			22219166	22219300		AT3G60140:CDS;		35.8537		hyper
Chr3			17307604	17308241		AT3G46980:three_prime_UTR;		35.8433		hyper
Chr3			9242504	9242681		AT3G25490:CDS;		35.8389		hyper
Chr4			16998572	16999014		AT4G35890:CDS;		35.7937		hyper
Chr1			8124043	8125708		AT1G22940:three_prime_UTR;AT1G22950:three_prime_UTR;		35.6919		hyper
Chr5			8886144	8886352		AT5G25520:CDS;		35.683		hyper
Chr2			15537984	15538005		AT2G36990:CDS;		35.6781		hyper
Chr5			22343099	22344696		AT5G55060:CDS;		35.675		hyper
Chr5			11393404	11395253		AT5G30584:transposable_element_gene;AT5TE41250:transposable_element;		35.6481		hyper
Chr3			4031662	4032365		AT3G12690:CDS;		35.6451		hyper
Chr3			17550062	17550449		AT3G47610:CDS;		35.6151		hyper
Chr2			2429242	2430175		AT2G06210:CDS;		35.6123		hyper
Chr5			849894	849955		AT5G03430:CDS;		35.562		hyper
Chr2			8041571	8041646		NONE		35.5368		hyper
Chr2			10302296	10302669		AT2G24230:CDS;		35.505		hyper
Chr5			21021498	21021699		AT5G51750:CDS;		35.4347		hyper
Chr1			6285297	6286749		AT1G18270:CDS;		35.4341		hyper
Chr3			17674069	17675173		AT3G47910:three_prime_UTR;		35.3539		hyper
Chr1			26478420	26479507		AT1G70300:CDS;		35.3408		hyper
Chr5			590773	591152		AT5G02620:CDS;		35.3182		hyper
Chr1			16432816	16433505		AT1G43624:CDS;AT1TE54180:transposable_element;AT1TE54185:transposable_element;		35.2909		hyper
Chr1			28908880	28910834		AT1G76950:CDS;		35.2899		hyper
Chr5			7993169	7993182		AT5G23700:CDS;		35.265		hyper
Chr5			10781506	10782924		AT5G28740:CDS;		35.2458		hyper
Chr2			6386680	6387762		AT2G14850:three_prime_UTR;AT2G14860:three_prime_UTR;		35.1892		hyper
Chr1			9078210	9079411		AT1G26240:CDS;		35.1437		hyper
Chr2			654007	654480		AT2G02470:CDS;		35.1164		hyper
Chr1			24783262	24783275		AT1G66440:CDS;		35.0938		hyper
Chr4			10266102	10268007		NONE		35.0862		hyper
Chr2			17078961	17080282		AT2G40930:CDS;		35.085		hyper
Chr3			17842577	17842666		NONE		35.0825		hyper
Chr3			18835275	18836387		AT3G50690:CDS;		35.0358		hyper
Chr4			13603094	13605319		AT4G27120:five_prime_UTR;AT4G27130:three_prime_UTR;		34.9386		hyper
Chr3			17583940	17584997		AT3G47700:CDS;		34.8635		hyper
Chr2			19449826	19450910		AT2G47410:CDS;		34.8389		hyper
Chr3			1764887	1765702		AT3G05910:CDS;		34.8385		hyper
Chr1			24870444	24870609		AT1G66690:CDS;		34.8282		hyper
Chr3			15006635	15007054		AT3G42940:CDS;		34.7947		hyper
Chr2			14786740	14786752		AT2G35075:CDS;		34.7653		hyper
Chr5			16361246	16362601		AT5G40840:CDS;		34.7629		hyper
Chr3			7264363	7267290		AT3G20780:CDS;		34.5765		hyper
Chr4			6247336	6251301		AT4G09970:three_prime_UTR;AT4G09980:three_prime_UTR;		34.5527		hyper
Chr5			13257018	13257740		AT5G34965:transposable_element_gene;AT5TE47100:transposable_element;		34.5218		hyper
Chr5			9192564	9194333		AT5G26240:CDS;		34.5112		hyper
Chr5			12739075	12739130		AT5G33439:ncRNA;		34.5101		hyper
Chr2			9537433	9537465		NONE		34.4775		hyper
Chr3			3681257	3682566		AT3G11670:three_prime_UTR;		34.4677		hyper
Chr1			13092127	13096610		AT1G35530:CDS;		34.4253		hyper
Chr3			6143827	6144046		AT3G17940:CDS;		34.3952		hyper
Chr3			1319213	1320792		AT3G04810:CDS;		34.3873		hyper
Chr5			5852827	5853148		AT5G17730:CDS;		34.3775		hyper
Chr1			23193347	23194622		AT1G62640:CDS;		34.3682		hyper
Chr1			1259069	1259265		AT1G04590:CDS;		34.2917		hyper
Chr4			7965687	7967399		AT4G13710:three_prime_UTR;AT4G13720:three_prime_UTR;		34.2814		hyper
Chr2			16959227	16960469		AT2G40630:CDS;		34.2254		hyper
Chr2			6882336	6886181		AT2G15800:transposable_element_gene;AT2G15810:transposable_element_gene;AT2TE28020:transposable_element;AT2TE28025:transposable_element;AT2TE28030:transposable_element;		34.1774		hyper
Chr1			861440	862357		AT1G03457:CDS;		34.1672		hyper
Chr3			19058263	19062705		AT3G51340:five_prime_UTR;AT3G51350:three_prime_UTR;		34.1506		hyper
Chr1			20261131	20261590		AT1G54270:CDS;		34.1108		hyper
Chr5			4514933	4515715		AT5G13990:CDS;		34.098		hyper
Chr3			5957901	5960249		AT3G17410:three_prime_UTR;AT3G17420:three_prime_UTR;		34.0743		hyper
Chr1			24307209	24308879		AT1G65440:CDS;		33.9873		hyper
Chr5			9728263	9728902		AT5G27550:CDS;		33.9835		hyper
Chr2			17305043	17306417		AT2G41500:CDS;		33.9676		hyper
Chr2			13961363	13961631		AT2G32910:CDS;		33.9671		hyper
Chr4			12832983	12834128		AT4G24970:CDS;		33.9373		hyper
Chr1			16380679	16380824		AT1TE53995:transposable_element;		33.919		hyper
Chr5			4731928	4732286		AT5G14680:CDS;		33.905		hyper
Chr1			24087497	24089900		AT1G64810:three_prime_UTR;AT1G64820:CDS;		33.8783		hyper
Chr5			18431518	18434505		AT5G45490:three_prime_UTR;AT5G45500:three_prime_UTR;		33.8733		hyper
Chr4			17446671	17446693		AT4G37020:CDS;		33.857		hyper
Chr4			5014329	5014513		AT4TE20945:transposable_element;		33.8501		hyper
Chr5			11047570	11048986		AT5G29022:transposable_element_gene;AT5TE40100:transposable_element;		33.8208		hyper
Chr5			23111108	23114462		AT5G57110:CDS;		33.8046		hyper
Chr3			21867977	21868095		AT3G59140:CDS;		33.7708		hyper
Chr3			7653539	7653732		AT3G21720:CDS;		33.7528		hyper
Chr4			13622534	13623557		AT4G27190:CDS;		33.7326		hyper
Chr5			17301469	17302471		AT5G43100:CDS;		33.6748		hyper
Chr2			1069875	1072782		AT2G03520:three_prime_UTR;AT2G03530:five_prime_UTR;		33.6417		hyper
Chr3			18105493	18108257		AT3G48830:CDS;		33.6413		hyper
Chr3			13424738	13424758		NONE		33.6116		hyper
Chr1			8508251	8510162		AT1G24050:three_prime_UTR;AT1G24060:five_prime_UTR;		33.5508		hyper
Chr1			6161001	6161015		AT1G17910:CDS;		33.5448		hyper
Chr1			20884303	20884920		AT1G55860:CDS;		33.5191		hyper
Chr5			4224018	4226461		AT5G13230:CDS;AT5G13240:three_prime_UTR;		33.5035		hyper
Chr5			6407624	6407655		AT5TE23185:transposable_element;		33.4662		hyper
Chr3			1016032	1018208		AT3G03940:CDS;		33.4513		hyper
Chr1			29052428	29053147		AT1G77310:CDS;		33.4274		hyper
Chr5			15203834	15203864		AT5G38096:pseudogene,pseudogenic_transcript;		33.4185		hyper
Chr3			10350979	10350989		AT3G27890:CDS;		33.3821		hyper
Chr1			26125461	26127636		AT1G69500:three_prime_UTR;AT1G69510:five_prime_UTR;		33.3741		hyper
Chr4			495170	495396		AT4G01160:CDS;		33.2577		hyper
Chr5			24561650	24563042		AT5G61030:three_prime_UTR;AT5G61040:three_prime_UTR;		33.2244		hyper
Chr3			12348994	12349381		AT3G30720:five_prime_UTR;AT3TE51150:transposable_element;		33.1906		hyper
Chr2			5211976	5212999		AT2G12720:transposable_element_gene;AT2TE21295:transposable_element;		33.1514		hyper
Chr1			6250492	6253108		AT1G18160:CDS;		33.1036		hyper
Chr3			20223578	20223735		AT3G54640:CDS;		33.1011		hyper
Chr2			10772238	10773530		AT2G25300:CDS;		33.0288		hyper
Chr4			2584412	2584572		NONE		33.0085		hyper
Chr3			22598682	22600595		AT3G61050:CDS;		32.9453		hyper
Chr4			15641967	15642009		AT4G32410:CDS;		32.9008		hyper
Chr1			24108418	24108539		AT1G64880:CDS;		32.8824		hyper
Chr2			17530823	17530967		NONE		32.8618		hyper
Chr2			7151275	7152011		AT2G16500:CDS;		32.8342		hyper
Chr3			22767004	22767993		AT3TE92795:transposable_element;AT3TE92800:transposable_element;AT3TE92805:transposable_element;AT3TE92810:transposable_element;		32.8231		hyper
Chr3			17612268	17613548		AT3G47760:CDS;		32.7898		hyper
Chr5			24574918	24576309		AT5G61090:CDS;		32.7874		hyper
Chr5			19198649	19199216		AT5G47300:CDS;		32.7817		hyper
Chr4			1938857	1938890		NONE		32.6589		hyper
Chr1			8078193	8078738		AT1G22830:CDS;		32.5893		hyper
Chr5			660268	660297		NONE		32.5777		hyper
Chr5			508865	510288		AT5G02390:CDS;		32.5623		hyper
Chr3			9916956	9917534		AT3G26910:CDS;		32.5563		hyper
Chr1			24199672	24200247		AT1G65130:CDS;		32.5096		hyper
Chr2			18201541	18201550		AT2G43950:CDS;		32.5084		hyper
Chr1			10030182	10030699		AT1G28520:CDS;		32.4549		hyper
Chr2			13237599	13238183		AT2G31081:five_prime_UTR;		32.4497		hyper
Chr1			17724545	17725638		AT1G48050:CDS;		32.4094		hyper
Chr3			699578	702876		AT3G03080:five_prime_UTR;AT3G03090:three_prime_UTR;		32.363		hyper
Chr3			22040717	22042184		AT3G59670:CDS;		32.3626		hyper
Chr2			17119901	17120725		AT2G41020:three_prime_UTR;		32.2674		hyper
Chr1			20862354	20863495		AT1G55810:CDS;		32.1633		hyper
Chr1			26289217	26290914		AT1G69830:CDS;		32.1528		hyper
Chr2			6719145	6719781		AT2G15410:transposable_element_gene;AT2TE27460:transposable_element;		32.0888		hyper
Chr3			15949346	15950819		AT3G44250:CDS;		32.0631		hyper
Chr5			1514048	1514532		AT5G05130:CDS;		32.0617		hyper
Chr1			1074998	1079458		AT1G04130:three_prime_UTR;AT1G04140:three_prime_UTR;		32.0612		hyper
Chr4			6536652	6536923		AT4TE27915:transposable_element;		32.04		hyper
Chr3			16188905	16188912		AT3G44610:CDS;		32.0055		hyper
Chr3			14540270	14541147		NONE		31.9689		hyper
Chr5			24567084	24570274		AT5G61060:three_prime_UTR;		31.9268		hyper
Chr3			15000430	15000833		AT3TE61145:transposable_element;AT3TE61160:transposable_element;		31.8791		hyper
Chr3			10092118	10094524		AT3G27320:three_prime_UTR;AT3G27321:pseudogene;AT3TE42010:transposable_element;		31.8782		hyper
Chr3			9339954	9340806		AT3G25660:CDS;		31.8717		hyper
Chr1			16639274	16640245		AT1G43886:transposable_element_gene;AT1TE54835:transposable_element;		31.8482		hyper
Chr2			12139929	12140775		AT2G28390:CDS;		31.8045		hyper
Chr2			839206	839530		AT2G02870:CDS;		31.797		hyper
Chr3			22851335	22854221		AT3G61740:CDS;		31.7851		hyper
Chr1			27949613	27950542		AT1G74340:mRNA;AT1G74350:CDS;		31.7502		hyper
Chr4			16050393	16052384		AT4G33290:CDS;AT4G33300:three_prime_UTR;		31.741		hyper
Chr5			23719053	23719319		AT5G58710:CDS;		31.6725		hyper
Chr1			21323333	21323384		AT1G57570:CDS;		31.6699		hyper
Chr2			9366490	9368026		AT2G22010:CDS;		31.6596		hyper
Chr2			5808394	5808664		AT2TE23665:transposable_element;		31.5856		hyper
Chr1			22239688	22239710		AT1G60340:CDS;		31.5376		hyper
Chr4			4978025	4979753		AT4TE20775:transposable_element;AT4TE20780:transposable_element;AT4TE20785:transposable_element;		31.5269		hyper
Chr3			3212071	3213842		AT3G10360:CDS;		31.4866		hyper
Chr1			19881549	19882036		AT1G53300:CDS;		31.4683		hyper
Chr4			8339233	8344078		AT4G14510:five_prime_UTR;AT4G14520:three_prime_UTR,five_prime_UTR;AT4G14530:CDS;		31.3704		hyper
Chr5			11517828	11519255		AT5G31778:transposable_element_gene;AT5TE41630:transposable_element;AT5TE41635:transposable_element;		31.3392		hyper
Chr3			6329478	6330497		AT3G18440:CDS;		31.3309		hyper
Chr4			13357987	13359132		AT4G26440:CDS;		31.327		hyper
Chr4			6129037	6130146		AT4G09710:transposable_element_gene;AT4TE25865:transposable_element;		31.2982		hyper
Chr3			11975690	11978050		AT3G30380:CDS;AT3G30390:three_prime_UTR;		31.2866		hyper
Chr5			1456021	1458496		AT5G04940:five_prime_UTR;AT5G04950:three_prime_UTR;		31.2625		hyper
Chr5			15720200	15720906		AT5G39245:transposable_element_gene;AT5TE56780:transposable_element;		31.2405		hyper
Chr4			14850071	14850174		AT4G30350:CDS;		31.2128		hyper
Chr4			13389921	13390152		AT4G26520:CDS;		31.1771		hyper
Chr3			11884243	11885492		AT3G30240:transposable_element_gene;AT3TE49470:transposable_element;		31.1769		hyper
Chr4			16328828	16329212		AT4G34090:CDS;		31.1649		hyper
Chr3			2218417	2224120		AT3G07020:five_prime_UTR;AT3G07025:tRNA;AT3G07030:CDS;AT3TE09350:transposable_element;		31.1647		hyper
Chr4			17488393	17490976		AT4G37120:three_prime_UTR;AT4G37130:five_prime_UTR;		31.1563		hyper
Chr3			12485538	12485653		AT3G30803:transposable_element_gene;AT3TE51505:transposable_element;		31.1123		hyper
Chr1			17728455	17728463		AT1G48060:CDS;		31.079		hyper
Chr1			3839656	3843155		AT1G11400:three_prime_UTR;AT1G11410:CDS;		31.0769		hyper
Chr2			10098667	10102304		AT2G23740:CDS;		31.0604		hyper
Chr1			5394753	5394960		NONE		31.0524		hyper
Chr1			801642	802255		AT1G03270:CDS;		31.0223		hyper
Chr5			3910698	3912475		AT5G12090:CDS;AT5G12100:five_prime_UTR;		30.982		hyper
Chr3			6513414	6514409		AT3G18890:CDS;		30.9696		hyper
Chr4			9018533	9024675		AT4G15890:three_prime_UTR;AT4G15900:five_prime_UTR;		30.9555		hyper
Chr5			12075695	12075880		NONE		30.9466		hyper
Chr4			6076521	6078009		AT4G09620:three_prime_UTR;		30.9039		hyper
Chr1			13406474	13406948		AT1G35980:pseudogene;		30.8809		hyper
Chr2			17857209	17860135		AT2G42910:three_prime_UTR;AT2G42920:five_prime_UTR;		30.7942		hyper
Chr4			11571638	11575598		AT4G21790:three_prime_UTR;AT4G21800:three_prime_UTR,five_prime_UTR;AT4G21810:three_prime_UTR;		30.7749		hyper
Chr1			7511111	7511290		AT1G21450:CDS;		30.76		hyper
Chr4			16831701	16834761		AT4G35410:three_prime_UTR,five_prime_UTR;AT4G35420:three_prime_UTR;		30.7341		hyper
Chr3			21964809	21965871		AT3G59430:five_prime_UTR;		30.7328		hyper
Chr3			16606658	16606729		AT3TE67330:transposable_element;		30.6892		hyper
Chr3			19784590	19785942		AT3G53360:CDS;		30.6471		hyper
Chr4			4624127	4625456		AT4G07806:transposable_element_gene;AT4TE19450:transposable_element;		30.6401		hyper
Chr4			14855095	14856670		AT4G30360:CDS;		30.6234		hyper
Chr4			655174	656859		AT4G01520:CDS;AT4TE03380:transposable_element;		30.6		hyper
Chr2			7667531	7669644		AT2G17630:three_prime_UTR;AT2G17640:three_prime_UTR;		30.5631		hyper
Chr2			6301224	6303341		AT2G14720:CDS;		30.5531		hyper
Chr1			1110829	1113621		AT1G04200:CDS;		30.5366		hyper
Chr4			17288607	17288625		AT4G36670:CDS;		30.5182		hyper
Chr5			24950824	24951403		AT5G62130:CDS;		30.5072		hyper
Chr3			11203553	11207639		AT3TE46665:transposable_element;AT3TE46670:transposable_element;AT3TE46675:transposable_element;		30.3979		hyper
Chr4			6647145	6647160		AT4TE28490:transposable_element;		30.3249		hyper
Chr2			9962765	9965610		AT2G23390:five_prime_UTR;AT2G23400:CDS;AT2TE42620:transposable_element;		30.3215		hyper
Chr4			11820631	11820794		AT4G22415:transposable_element_gene;AT4TE54700:transposable_element;		30.3143		hyper
Chr3			1149695	1155079		AT3G04340:CDS;AT3G04350:three_prime_UTR;		30.2751		hyper
Chr5			16405606	16405651		AT5G40930:CDS;		30.211		hyper
Chr4			9661349	9662236		AT4G17230:CDS;		30.168		hyper
Chr3			7822844	7823808		AT3G22170:CDS;		30.1429		hyper
Chr1			8997787	8998416		AT1G25580:CDS;		30.0583		hyper
Chr3			22793699	22793970		AT3G61590:CDS;		30.0018		hyper
Chr1			21765104	21765374		AT1G58602:three_prime_UTR;		29.9724		hyper
Chr1			19410083	19410348		AT1G52150:three_prime_UTR;		29.9704		hyper
Chr2			14141118	14142686		AT2G33360:CDS;		29.9077		hyper
Chr1			16571326	16573805		AT1G43781:pseudogene,pseudogenic_transcript;AT1G43785:transposable_element_gene;AT1TE54625:transposable_element;		29.8999		hyper
Chr3			1420098	1422545		AT3G05090:CDS;		29.8945		hyper
Chr1			23979959	23985035		AT1G64570:CDS;AT1G64572:ncRNA;AT1G64580:three_prime_UTR;		29.8736		hyper
Chr3			18354765	18356196		AT3G49510:CDS;		29.8165		hyper
Chr5			14889912	14891649		AT5G37500:CDS;		29.8006		hyper
Chr1			4486101	4490117		AT1G13160:three_prime_UTR;AT1G13170:three_prime_UTR;AT1TE14590:transposable_element;		29.7876		hyper
Chr5			17640209	17641637		AT5G43880:CDS;		29.7832		hyper
Chr4			13691194	13691291		AT4G27350:CDS;		29.7677		hyper
Chr5			16597530	16607872		AT5G41471:gene,snoRNA,exon;AT5G41480:three_prime_UTR;AT5G41490:CDS;AT5G41491:pseudogene;AT5G41494:pseudogene;AT5G41500:CDS;AT5G41505:transposable_element_gene;AT5G41510:CDS;AT5TE59940:transposable_element;AT5TE59950:transposable_element;AT5TE59955:transposable_element;		29.7573		hyper
Chr4			15214570	15215540		AT4G31350:CDS;		29.7542		hyper
Chr5			12282547	12283870		AT5G32623:transposable_element_gene;AT5TE43625:transposable_element;AT5TE43630:transposable_element;		29.7511		hyper
Chr2			7560857	7563413		AT2G17410:CDS;		29.7504		hyper
Chr1			20222756	20223631		AT1G54170:CDS;		29.6789		hyper
Chr4			13906618	13906783		AT4G27940:CDS;		29.6349		hyper
Chr2			13759134	13764080		AT2G32410:three_prime_UTR;AT2G32415:three_prime_UTR;		29.5883		hyper
Chr5			13889813	13891307		AT5G35725:transposable_element_gene;AT5TE49495:transposable_element;		29.5822		hyper
Chr4			13530166	13531175		AT4G26940:three_prime_UTR;		29.5462		hyper
Chr2			1177405	1178830		AT2G03860:transposable_element_gene;AT2TE05315:transposable_element;AT2TE05320:transposable_element;		29.5204		hyper
Chr1			13973343	13973702		AT1TE45855:transposable_element;AT1TE45860:transposable_element;		29.4682		hyper
Chr5			1528876	1528953		AT5G05160:CDS;		29.467		hyper
Chr4			15691612	15691860		AT4G32520:CDS;		29.4645		hyper
Chr3			16720106	16721365		AT3G45560:CDS;		29.4184		hyper
Chr2			8141406	8143506		AT2G18790:CDS;		29.3865		hyper
Chr3			11235049	11236215		AT3G29270:three_prime_UTR,five_prime_UTR;		29.3839		hyper
Chr3			233806	236133		AT3G01610:three_prime_UTR;AT3G01620:three_prime_UTR;		29.3801		hyper
Chr5			14786448	14791323		AT5G37340:three_prime_UTR;		29.3063		hyper
Chr1			11942733	11944207		AT1G32950:CDS;		29.2132		hyper
Chr4			8481580	8482639		AT4G14770:CDS;		29.16		hyper
Chr5			1544352	1545721		AT5G05200:CDS;		29.1484		hyper
Chr4			6468583	6471612		AT4G10460:transposable_element_gene;AT4TE27640:transposable_element;		29.1244		hyper
Chr5			17206588	17207008		AT5G42920:CDS;		29.1211		hyper
Chr5			18723356	18724461		AT5G46190:three_prime_UTR;		29.0869		hyper
Chr3			21272668	21273605		AT3G57470:CDS;		29.0772		hyper
Chr2			5752401	5756561		AT2G13800:five_prime_UTR;AT2TE23345:transposable_element;AT2TE23350:transposable_element;AT2TE23355:transposable_element;		29.0697		hyper
Chr2			15604664	15605586		AT2G37150:CDS;		29.0185		hyper
Chr4			17898576	17898655		AT4G38130:CDS;		28.9829		hyper
Chr4			16079033	16079455		AT4G33400:CDS;		28.9758		hyper
Chr4			18345038	18353694		AT4G39420:CDS;		28.8877		hyper
Chr3			23371683	23371882		AT3G63250:CDS;		28.8852		hyper
Chr4			18261519	18262485		AT4G39210:CDS;		28.8533		hyper
Chr5			12919938	12922798		AT5G34581:CDS;AT5G34602:transposable_element_gene;AT5TE45995:transposable_element;AT5TE46000:transposable_element;		28.8479		hyper
Chr1			7379766	7380174		AT1G21080:CDS;		28.8393		hyper
Chr2			18968388	18970244		AT2G46180:CDS;		28.8181		hyper
Chr3			289649	291382		AT3G01810:CDS;		28.816		hyper
Chr2			12951746	12952193		AT2G30390:CDS;		28.7436		hyper
Chr2			10249681	10251130		AT2G24120:three_prime_UTR;		28.6385		hyper
Chr5			22402973	22404466		AT5G55230:CDS;		28.6326		hyper
Chr5			2903492	2904207		AT5G09350:CDS;		28.4785		hyper
Chr1			29551658	29551751		AT1G78570:CDS;		28.4701		hyper
Chr1			16761450	16761773		AT1G44090:CDS;		28.4571		hyper
Chr5			25160519	25160783		AT5G62670:CDS;		28.4157		hyper
Chr1			19542789	19545203		AT1G52450:CDS;AT1TE64660:transposable_element;		28.4024		hyper
Chr5			17216661	17219008		AT5G42940:CDS;		28.3821		hyper
Chr4			6782211	6784101		AT4G11130:CDS;		28.3666		hyper
Chr3			2112326	2112448		AT3G06670:CDS;		28.3553		hyper
Chr3			4520796	4523525		AT3G13770:CDS;AT3G13772:three_prime_UTR;		28.337		hyper
Chr3			12172376	12172416		AT3G30582:transposable_element_gene;AT3TE50550:transposable_element;AT3TE50560:transposable_element;		28.3271		hyper
Chr1			7965548	7965829		AT1G22540:CDS;		28.2724		hyper
Chr4			8155170	8155769		AT4G14147:CDS;		28.2699		hyper
Chr3			2673472	2674493		AT3G08800:CDS;		28.2448		hyper
Chr1			21593193	21595792		AT1G58250:CDS;		28.2182		hyper
Chr5			7788325	7792057		AT5G23150:CDS;		28.1247		hyper
Chr5			11619456	11620153		AT5G30510:CDS;		28.0884		hyper
Chr5			16132252	16133443		AT5G40340:CDS;AT5TE58305:transposable_element;		28.0503		hyper
Chr4			5765006	5765346		AT4G08990:CDS;		28.0247		hyper
Chr4			2306509	2309805		AT4G04600:transposable_element_gene;AT4G04601:CDS;AT4TE10700:transposable_element;AT4TE10705:transposable_element;		28.0123		hyper
Chr5			19787753	19789388		AT5G48800:three_prime_UTR;AT5G48810:three_prime_UTR;		28.0081		hyper
Chr2			5477006	5478755		AT2G13230:transposable_element_gene;AT2TE22185:transposable_element;		27.991		hyper
Chr3			6798906	6801451		AT3G19570:three_prime_UTR;		27.9062		hyper
Chr5			13075575	13076365		AT5TE46515:transposable_element;		27.904		hyper
Chr5			23361481	23362738		AT5G57670:CDS;		27.8935		hyper
Chr3			10917756	10918126		AT3G28915:transposable_element_gene;AT3TE45385:transposable_element;		27.8716		hyper
Chr1			525281	528050		AT1G02520:CDS;		27.8597		hyper
Chr5			4837888	4839269		AT5G14950:CDS;		27.859		hyper
Chr5			22311186	22311195		AT5G54960:CDS;		27.7305		hyper
Chr2			1873389	1875715		AT2G05170:three_prime_UTR;AT2G05171:pseudogene;AT2G05180:CDS;		27.6796		hyper
Chr5			25351824	25354043		AT5G63200:three_prime_UTR;AT5G63220:three_prime_UTR;		27.659		hyper
Chr5			11151976	11153899		AT5G29100:transposable_element_gene;AT5G29210:CDS;AT5TE40380:transposable_element;AT5TE40385:transposable_element;		27.6503		hyper
Chr5			18426728	18427889		AT5G45475:ncRNA;AT5G45480:CDS;		27.6317		hyper
Chr4			3627159	3628460		AT4G06592:transposable_element_gene;AT4TE16165:transposable_element;		27.5863		hyper
Chr1			7498510	7499300		AT1G21410:CDS;		27.5421		hyper
Chr5			2779274	2779904		AT5G08570:CDS;		27.513		hyper
Chr4			3342029	3343135		AT4G06529:transposable_element_gene;		27.5057		hyper
Chr3			20549973	20550180		AT3G55430:CDS;		27.4368		hyper
Chr5			19383701	19384159		AT5G47860:CDS;		27.4361		hyper
Chr5			18822193	18823524		AT5G46400:CDS;		27.3823		hyper
Chr1			16486070	16492180		AT1G43700:three_prime_UTR;AT1G43710:three_prime_UTR,five_prime_UTR;AT1G43715:transposable_element_gene;AT1TE54400:transposable_element;		27.3308		hyper
Chr2			9251908	9253158		AT2G21630:CDS;		27.2986		hyper
Chr2			7333126	7334412		AT2G16910:three_prime_UTR;AT2G16920:three_prime_UTR;		27.2591		hyper
Chr1			19919435	19920852		AT1G53390:CDS;		27.2038		hyper
Chr1			10992393	10995150		AT1G30870:three_prime_UTR;AT1G30880:three_prime_UTR,five_prime_UTR;AT1G30890:five_prime_UTR;		27.1821		hyper
Chr3			23413888	23415175		AT3G63400:CDS;		27.0664		hyper
Chr1			25539495	25540390		AT1G68140:CDS;		27.0354		hyper
Chr4			3687787	3689758		AT4G06604:transposable_element_gene;AT4TE16380:transposable_element;AT4TE16390:transposable_element;		26.9191		hyper
Chr3			9311529	9311911		AT3G25610:CDS;		26.9065		hyper
Chr4			14462483	14464337		AT4G29380:CDS;		26.8964		hyper
Chr1			18894508	18894854		AT1TE62585:transposable_element;		26.8911		hyper
Chr2			13636349	13638177		AT2G32040:three_prime_UTR;AT2G32050:CDS;		26.8609		hyper
Chr4			8070717	8072056		AT4G13970:CDS;		26.8164		hyper
Chr5			4018569	4022214		AT5G12400:three_prime_UTR;AT5G12410:three_prime_UTR;		26.8135		hyper
Chr3			1868921	1869641		AT3G06170:CDS;		26.8039		hyper
Chr1			18628933	18631272		AT1G50300:CDS;		26.7934		hyper
Chr1			20190925	20191151		AT1G54090:CDS;		26.7836		hyper
Chr1			27955891	27958305		AT1G74360:three_prime_UTR;AT1G74370:three_prime_UTR;		26.7327		hyper
Chr2			12911080	12915815		AT2G30280:five_prime_UTR;AT2G30290:five_prime_UTR,three_prime_UTR;		26.6493		hyper
Chr4			16297326	16299307		AT4G34000:three_prime_UTR;AT4G34020:three_prime_UTR;		26.6264		hyper
Chr4			2981996	2982109		AT4G05616:transposable_element_gene;AT4TE13880:transposable_element;		26.5811		hyper
Chr1			22673787	22675413		AT1G61450:three_prime_UTR;AT1G61460:three_prime_UTR;		26.5717		hyper
Chr4			5027396	5032089		AT4G08106:transposable_element_gene;AT4G08107:transposable_element_gene;AT4TE20975:transposable_element;AT4TE20980:transposable_element;AT4TE20985:transposable_element;AT4TE20990:transposable_element;AT4TE20995:transposable_element;AT4TE21000:transposable_element;		26.5003		hyper
Chr1			20509671	20509712		NONE		26.4963		hyper
Chr4			4870612	4874846		AT4TE20275:transposable_element;AT4TE20280:transposable_element;AT4TE20285:transposable_element;		26.4768		hyper
Chr3			17764100	17765224		AT3G48110:CDS;		26.4615		hyper
Chr4			14130737	14132516		AT4G28600:CDS;		26.4535		hyper
Chr1			13550960	13558115		AT1G36180:CDS;		26.4075		hyper
Chr1			13947037	13950233		AT1G36800:transposable_element_gene;AT1TE45795:transposable_element;		26.2944		hyper
Chr4			4802922	4804194		AT4G07960:CDS;AT4TE20030:transposable_element;		26.2728		hyper
Chr4			7446237	7448430		AT4G12570:CDS;		26.2424		hyper
Chr2			12544344	12547224		AT2G29190:CDS;		26.2389		hyper
Chr2			9167003	9168043		AT2G21410:CDS;		26.1893		hyper
Chr4			13371544	13373603		AT4G26470:three_prime_UTR;AT4G26480:three_prime_UTR;		26.0846		hyper
Chr1			26068227	26071360		AT1G69340:three_prime_UTR;AT1G69350:CDS;		26.0467		hyper
Chr5			5159767	5160201		AT5G15810:CDS;		26.0156		hyper
Chr2			16133637	16136434		AT2G38550:three_prime_UTR;AT2G38560:three_prime_UTR,five_prime_UTR;		26.0138		hyper
Chr1			18081791	18085468		AT1G48880:three_prime_UTR;AT1G48890:transposable_element_gene;AT1G48900:three_prime_UTR;AT1TE59950:transposable_element;AT1TE59955:transposable_element;AT1TE59960:transposable_element;AT1TE59965:transposable_element;AT1TE59970:transposable_element;		26.0105		hyper
Chr1			10433974	10435013		AT1G29800:CDS;		25.9779		hyper
Chr4			1070347	1071334		AT4G02430:three_prime_UTR;		25.9193		hyper
Chr1			12222228	12225664		AT1G33720:five_prime_UTR;		25.8931		hyper
Chr1			25872865	25874015		AT1G68830:CDS;		25.827		hyper
Chr5			16984143	16992073		AT5G42470:three_prime_UTR;AT5G42480:three_prime_UTR,five_prime_UTR;AT5G42490:CDS;		25.8238		hyper
Chr1			28562085	28562841		AT1G76130:CDS;		25.8129		hyper
Chr5			4510468	4511274		AT5G13980:CDS;		25.7618		hyper
Chr5			643875	645243		AT5G02820:three_prime_UTR;AT5G02830:three_prime_UTR;		25.7352		hyper
Chr3			19523715	19524618		AT3G52660:CDS;		25.6864		hyper
Chr1			21984089	21985585		AT1G59750:three_prime_UTR;AT1G59760:three_prime_UTR;		25.6853		hyper
Chr1			18623427	18623771		AT1G50270:CDS;AT1G50280:three_prime_UTR;		25.6697		hyper
Chr3			22942490	22943088		AT3G61960:CDS;		25.6585		hyper
Chr1			6186721	6189998		AT1G17970:three_prime_UTR;AT1G17980:three_prime_UTR;		25.6472		hyper
Chr5			7944661	7945259		AT5G23570:CDS;		25.6254		hyper
Chr3			10688896	10689068		AT3G28520:CDS;		25.6065		hyper
Chr4			18384381	18384435		AT4G39570:CDS;		25.5841		hyper
Chr2			18121977	18122282		AT2G43710:CDS;		25.5606		hyper
Chr1			3659786	3663053		AT1G10950:CDS;		25.4658		hyper
Chr3			17678030	17680280		AT3G47910:CDS;		25.4634		hyper
Chr5			10942088	10944941		AT5G28920:CDS;AT5TE39820:transposable_element;		25.4524		hyper
Chr4			6521924	6527037		AT4G10560:CDS;AT4G10570:three_prime_UTR;		25.4469		hyper
Chr2			8761556	8761596		AT2G20310:CDS;		25.4345		hyper
Chr1			23058032	23058153		AT1G62350:three_prime_UTR;AT1G62355:miRNA;		25.3893		hyper
Chr5			19547444	19551278		AT5G48205:CDS;AT5G48210:three_prime_UTR,five_prime_UTR;AT5G48220:five_prime_UTR;AT5TE70340:transposable_element;		25.3098		hyper
Chr3			13357934	13359854		AT3G32400:CDS;		25.2558		hyper
Chr1			962257	966010		AT1G03830:CDS;		25.2173		hyper
Chr3			18297834	18298142		AT3G49350:CDS;		25.1017		hyper
Chr3			1675876	1677384		AT3G05690:three_prime_UTR;AT3TE07045:transposable_element;AT3TE07050:transposable_element;		25.0831		hyper
Chr5			21823580	21825408		AT5G53760:CDS;		25.0217		hyper
Chr3			9068986	9070040		AT3G24840:CDS;		24.9153		hyper
Chr2			8903059	8905244		AT2G20635:CDS;AT2G20650:three_prime_UTR;		24.8986		hyper
Chr5			15766084	15768802		AT5G39400:three_prime_UTR,five_prime_UTR;AT5G39410:three_prime_UTR;		24.8869		hyper
Chr2			7143238	7144495		AT2G16485:CDS;AT2TE29070:transposable_element;		24.8825		hyper
Chr1			3433362	3435746		AT1G10450:CDS;		24.8241		hyper
Chr1			7210916	7220442		AT1G20760:three_prime_UTR;AT1G20770:three_prime_UTR,five_prime_UTR;AT1G20780:five_prime_UTR;		24.7829		hyper
Chr2			9136568	9138502		AT2G21350:CDS;AT2G21360:tRNA;AT2G21370:three_prime_UTR;		24.7268		hyper
Chr3			7564328	7564486		AT3G21470:CDS;		24.7206		hyper
Chr4			16185175	16185474		AT4G33730:CDS;		24.6875		hyper
Chr5			1304215	1304804		AT5G04550:CDS;		24.6803		hyper
Chr5			1863155	1865628		AT5G06160:CDS;		24.5893		hyper
Chr5			18545069	18546098		AT5G45720:CDS;		24.4807		hyper
Chr4			8675375	8678546		AT4G15215:CDS;		24.4051		hyper
Chr1			4354741	4355314		AT1G12775:CDS;		24.4017		hyper
Chr2			18242966	18243635		AT2G44100:CDS;		24.399		hyper
Chr2			9997041	10000482		AT2G23460:three_prime_UTR;AT2G23470:three_prime_UTR;		24.2669		hyper
Chr5			974987	978049		AT5G03730:CDS;		24.2571		hyper
Chr1			2075310	2075745		AT1G06750:CDS;		24.238		hyper
Chr5			12453005	12455482		AT5G33200:transposable_element_gene;AT5TE44180:transposable_element;AT5TE44185:transposable_element;		24.1843		hyper
Chr2			13154962	13157726		AT2G30910:three_prime_UTR;AT2G30920:three_prime_UTR;		24.1822		hyper
Chr1			3864548	3865108		AT1G11480:CDS;		24.1811		hyper
Chr4			8566367	8567746		AT4G14990:CDS;		24.1746		hyper
Chr1			20288755	20290106		AT1G54350:CDS;AT1G54355:ncRNA;		24.1654		hyper
Chr3			4412561	4413930		AT3G13530:CDS;		24.1523		hyper
Chr1			9052178	9052868		AT1G26170:CDS;		24.146		hyper
Chr1			17453154	17454067		AT1G47530:CDS;		24.1381		hyper
Chr5			19267958	19270122		AT5G47490:CDS;		24.0938		hyper
Chr4			7499010	7500596		AT4G12750:CDS;		24.0591		hyper
Chr3			1862124	1862607		AT3G06150:CDS;		23.9079		hyper
Chr2			12853405	12856724		AT2G30110:CDS;		23.8898		hyper
Chr5			25282782	25284343		AT5G63010:three_prime_UTR;AT5G63020:three_prime_UTR;		23.865		hyper
Chr4			16866869	16870784		AT4G35520:CDS;		23.8615		hyper
Chr1			881156	881754		AT1G03530:CDS;		23.856		hyper
Chr5			2772147	2773762		AT5G08560:CDS;		23.8135		hyper
Chr3			18741897	18742936		AT3G50500:CDS;		23.8133		hyper
Chr1			19486470	19487138		AT1G52320:CDS;		23.7943		hyper
Chr2			14867237	14867539		AT2G35320:CDS;		23.7845		hyper
Chr3			4637179	4640174		AT3G14010:CDS;		23.7724		hyper
Chr1			5520120	5520405		AT1G16110:CDS;		23.7357		hyper
Chr5			14126476	14128992		AT5G35980:five_prime_UTR;		23.647		hyper
Chr5			10360184	10365422		AT5G28415:transposable_element_gene;AT5G28420:CDS;AT5TE37815:transposable_element;AT5TE37820:transposable_element;		23.5692		hyper
Chr3			6598131	6598422		AT3G19080:CDS;		23.518		hyper
Chr2			462141	465337		AT2G01980:three_prime_UTR;AT2G01990:three_prime_UTR;AT2TE01970:transposable_element;		23.5114		hyper
Chr5			19466511	19467248		AT5G48030:CDS;		23.472		hyper
Chr1			645650	649825		AT1G02890:CDS;		23.4686		hyper
Chr3			3486040	3486326		AT3G11130:CDS;		23.4336		hyper
Chr3			5909584	5910383		AT3G17310:CDS;		23.4167		hyper
Chr4			2544408	2547730		AT4G04980:CDS;AT4TE11920:transposable_element;		23.4025		hyper
Chr3			6095177	6095768		AT3G17810:CDS;		23.4013		hyper
Chr1			29844043	29849468		AT1G79340:three_prime_UTR;AT1G79350:three_prime_UTR;		23.3312		hyper
Chr3			7791698	7793482		AT3G22104:three_prime_UTR;AT3G22110:three_prime_UTR;		23.2117		hyper
Chr1			7156223	7159043		AT1G20640:three_prime_UTR;AT1G20650:three_prime_UTR;		23.1417		hyper
Chr4			9719418	9719461		AT4G17410:CDS;		23.0929		hyper
Chr3			15727741	15728364		AT3G43870:CDS;		23.0908		hyper
Chr4			1086821	1087521		AT4G02480:CDS;		23.0801		hyper
Chr4			12076042	12077723		AT4G23040:CDS;		22.9787		hyper
Chr2			10291650	10292694		AT2G24205:CDS;AT2TE44050:transposable_element;		22.9525		hyper
Chr2			692067	694444		AT2G02560:CDS;		22.8836		hyper
Chr2			1658601	1662455		AT2G04740:three_prime_UTR;AT2G04750:CDS;		22.8822		hyper
Chr3			4001289	4002849		AT3G12590:CDS;		22.8494		hyper
Chr5			18397152	18400908		AT5G45390:three_prime_UTR;AT5G45400:CDS;		22.8418		hyper
Chr3			10130695	10134179		AT3G27380:three_prime_UTR,five_prime_UTR;AT3G27390:three_prime_UTR;		22.8279		hyper
Chr1			21458415	21461222		AT1G58025:CDS;		22.808		hyper
Chr1			25453062	25454460		AT1G67880:three_prime_UTR;		22.7657		hyper
Chr1			6767781	6769974		AT1G19550:CDS;AT1G19560:pseudogene;AT1TE21880:transposable_element;		22.7599		hyper
Chr2			18895966	18899853		AT2G45910:three_prime_UTR;AT2G45920:five_prime_UTR;AT2TE85930:transposable_element;		22.7216		hyper
Chr5			14631486	14633747		AT5G37020:CDS;		22.5989		hyper
Chr3			15389911	15391557		AT3G43460:transposable_element_gene;AT3TE62450:transposable_element;AT3TE62480:transposable_element;AT3TE62485:transposable_element;		22.5873		hyper
Chr5			17067044	17070298		AT5G42620:CDS;		22.5649		hyper
Chr1			27915965	27916425		AT1G74230:CDS;		22.4833		hyper
Chr3			2648850	2650082		AT3G08720:CDS;		22.4409		hyper
Chr1			19855235	19855491		AT1G53240:CDS;		22.3712		hyper
Chr5			16916770	16917562		AT5G42310:CDS;		22.3155		hyper
Chr1			25805948	25809666		AT1G68720:three_prime_UTR;AT1G68725:CDS;AT1TE84620:transposable_element;		22.2999		hyper
Chr4			7608008	7608789		AT4G13030:CDS;		22.271		hyper
Chr1			17946858	17950339		AT1G48540:CDS;		22.2145		hyper
Chr1			1341653	1342300		AT1G04780:CDS;		22.2038		hyper
Chr3			1343737	1345620		AT3G04870:CDS;		22.1998		hyper
Chr5			3859749	3860167		AT5G11960:CDS;		22.1855		hyper
Chr3			12657357	12658388		AT3G30885:pseudogene;		22.1062		hyper
Chr3			21118568	21119880		AT3G57060:CDS;		22.0979		hyper
Chr5			4496438	4497452		AT5G13950:CDS;		22.0934		hyper
Chr1			29747638	29750771		AT1G79080:five_prime_UTR;AT1G79090:three_prime_UTR;		22.0576		hyper
Chr5			18687121	18687720		AT5G46070:CDS;		22.0528		hyper
Chr2			11698834	11701173		AT2G27340:three_prime_UTR;AT2G27350:three_prime_UTR;		22.0522		hyper
Chr1			25650316	25651516		AT1G68410:CDS;		22.0376		hyper
Chr4			13781448	13783469		AT4G27600:three_prime_UTR;AT4TE64950:transposable_element;		21.9276		hyper
Chr2			18291942	18292889		AT2G44240:three_prime_UTR;AT2TE82905:transposable_element;AT2TE82920:transposable_element;		21.9011		hyper
Chr3			16231085	16233209		AT3G44690:CDS;		21.872		hyper
Chr3			17089406	17090437		AT3G46440:CDS;		21.7976		hyper
Chr4			7130099	7136442		AT4G11850:five_prime_UTR;AT4G11860:three_prime_UTR;AT4TE31000:transposable_element;		21.7584		hyper
Chr3			18690939	18691322		AT3G50380:CDS;		21.7452		hyper
Chr3			6129699	6130769		AT3G17900:CDS;		21.7375		hyper
Chr3			7582195	7582450		AT3G21520:CDS;		21.7047		hyper
Chr3			20980028	20983390		AT3G56630:three_prime_UTR;AT3G56640:five_prime_UTR;		21.6449		hyper
Chr2			7866259	7867071		AT2G18090:CDS;		21.6347		hyper
Chr4			11394989	11395662		AT4G21390:CDS;		21.6226		hyper
Chr5			274139	276743		AT5G01730:CDS;AT5G01732:ncRNA;		21.6008		hyper
Chr5			8283643	8286852		AT5G24318:five_prime_UTR;AT5G24320:three_prime_UTR;		21.5553		hyper
Chr3			4668779	4669951		AT3G14080:three_prime_UTR;AT3G14090:three_prime_UTR;		21.5452		hyper
Chr4			6155234	6156650		AT4G09770:five_prime_UTR;AT4G09775:CDS;		21.5372		hyper
Chr4			7117056	7118855		AT4G11830:CDS;		21.518		hyper
Chr1			20082841	20083709		AT1G53800:CDS;AT1G53801:ncRNA;		21.3662		hyper
Chr4			15647866	15650421		AT4G32420:CDS;		21.2956		hyper
Chr2			8726732	8729478		AT2G20230:three_prime_UTR;AT2G20240:three_prime_UTR;		21.2602		hyper
Chr5			10009499	10016603		AT5G27970:three_prime_UTR;AT5G27980:three_prime_UTR;		21.2332		hyper
Chr3			9941526	9941685		AT3G26950:CDS;		21.2047		hyper
Chr2			5016463	5016640		NONE		21.155		hyper
Chr2			9462120	9464461		AT2G22260:three_prime_UTR;AT2G22270:five_prime_UTR;		21.1135		hyper
Chr4			10892079	10893751		AT4G20160:CDS;		21.1067		hyper
Chr1			28656318	28656791		AT1G76390:CDS;		21.0839		hyper
Chr5			14009254	14015632		AT5G35840:three_prime_UTR;AT5TE49950:transposable_element;AT5TE49955:transposable_element;AT5TE49960:transposable_element;AT5TE49965:transposable_element;AT5TE49970:transposable_element;		21.0708		hyper
Chr5			8251974	8256209		AT5G24280:CDS;		21.0693		hyper
Chr5			16314047	16314211		AT5G40760:CDS;		21.0448		hyper
Chr5			20042355	20044397		AT5G49430:CDS;		21.0386		hyper
Chr1			25932436	25938309		AT1G68980:three_prime_UTR,five_prime_UTR;AT1G68990:three_prime_UTR;		21.0131		hyper
Chr1			23034331	23035131		NONE		21.0009		hyper
Chr1			23741571	23744144		AT1G63980:three_prime_UTR;AT1G63990:three_prime_UTR;AT1TE78160:transposable_element;		20.9184		hyper
Chr3			6688208	6691656		AT3G19290:three_prime_UTR;AT3G19300:three_prime_UTR;		20.8677		hyper
Chr1			19528688	19529810		AT1G52420:CDS;		20.8495		hyper
Chr5			1626755	1630246		AT5G05490:three_prime_UTR;AT5G05500:five_prime_UTR;		20.8459		hyper
Chr3			17628361	17631046		AT3G47780:three_prime_UTR;AT3G47790:five_prime_UTR;		20.8403		hyper
Chr1			10980419	10982101		AT1G30845:three_prime_UTR;		20.7805		hyper
Chr2			6688247	6689209		AT2G15350:CDS;		20.7569		hyper
Chr2			10185962	10187745		AT2G23945:CDS;AT2G23950:three_prime_UTR;		20.7495		hyper
Chr3			6570845	6570933		AT3G19040:CDS;		20.7266		hyper
Chr5			22320657	22320954		AT5G55000:CDS;		20.7136		hyper
Chr1			27020665	27021424		AT1G71830:CDS;		20.7041		hyper
Chr1			5466273	5467671		AT1G15910:CDS;		20.7037		hyper
Chr2			8233287	8233786		AT2G18980:three_prime_UTR;AT2TE34260:transposable_element;		20.6895		hyper
Chr4			11725870	11729277		AT4G22130:three_prime_UTR;AT4G22140:three_prime_UTR;		20.6113		hyper
Chr2			8660562	8661287		AT2G20060:three_prime_UTR;		20.6056		hyper
Chr2			4399709	4400708		AT2G11090:transposable_element_gene;AT2G11100:transposable_element_gene;AT2TE18435:transposable_element;AT2TE18440:transposable_element;		20.6038		hyper
Chr1			21362818	21363389		AT1G57680:CDS;		20.592		hyper
Chr2			15809326	15812413		AT2G37690:three_prime_UTR;AT2G37700:three_prime_UTR;AT2TE70700:transposable_element;		20.5904		hyper
Chr4			13034261	13035233		AT4G25520:CDS;		20.5688		hyper
Chr2			553529	557642		AT2G02160:five_prime_UTR;AT2G02170:three_prime_UTR;AT2TE02390:transposable_element;		20.5434		hyper
Chr1			980009	980024		AT1G03860:CDS;		20.4573		hyper
Chr2			17734845	17737522		AT2G42600:CDS;		20.4402		hyper
Chr2			19652651	19655264		AT2G48060:CDS;		20.4243		hyper
Chr1			20609293	20609556		AT1G55250:CDS;		20.3962		hyper
Chr3			13890256	13890932		AT3G33115:transposable_element_gene;AT3TE57085:transposable_element;		20.3856		hyper
Chr4			16791044	16793022		AT4G35290:CDS;		20.3384		hyper
Chr5			20784501	20785866		AT5G51140:CDS;		20.3373		hyper
Chr5			5196648	5198035		AT5G15920:CDS;		20.3265		hyper
Chr3			21180194	21182520		AT3G57230:three_prime_UTR;AT3G57240:three_prime_UTR;		20.3172		hyper
Chr5			13556862	13557463		AT5G35341:transposable_element_gene;AT5TE48150:transposable_element;		20.305		hyper
Chr2			8835310	8836893		AT2G20500:five_prime_UTR;AT2G20510:CDS;		20.2923		hyper
Chr5			9692410	9696929		AT5G27450:three_prime_UTR;AT5G27460:five_prime_UTR;AT5G27470:five_prime_UTR;		20.2672		hyper
[truncated: 1,096 more rows]

## Sheet: Sheet1
hypo	hyper				hypo	hyper
19	2				573	664			3419
3	7				626	339			131
32	3				1955	1569			13
2	1				329	289			110
46	5				195	266			3673		0.930847
385	185				287	1547
371	144				24	85
1091	882				21	50
1949	1229	total DMRs			43	213
0.947665	0.985354	fraction CG DMRs			4053	5022
					0.778189	0.512147
