# Supplementary material for: Herbicide injury induces DNA methylome alterations in Arabidopsis
Source: PeerJ. 2017 Jul 20;5:e3560. doi: 10.7717/peerj.3560 (PMC5522609; doi:10.7717/peerj.3560)
Supplement: Supplemental Information 10 — All differentially methylated regions (DMRs) identified using bsseq algorithm. [file peerj-05-3560-s010.xlsx]

## Sheet: CG
Chromosome	5% start	5% end	10% start	10% end	5% annotation	10% annotation	5% meanDiff	10% meanDiff	5% direction	10% direction	edmr Overlap 5%	edmr Overlap 10%	Proposed baseline methylation state in A. thaliana?
Chr3	5814912	5815555	5814836	5815555	AT3G17050:transposable_element_gene;AT3TE24450:transposable_element;AT3TE24455:transposable_element;	AT3G17050:transposable_element_gene;AT3TE24450:transposable_element;AT3TE24455:transposable_element;	0.190355	0.250628	hyper	hyper	yes	yes	n/a	(UM = unmethylated), based on comparison to Table S4 in Niederhuth et. al. 2016. Genome biology.
ChrM	102406	102996	102406	102710	no match	no match	0.210687	0.210001	hyper	hyper	no	no	n/a	The multigenic DMRs are listed as being previously characteriazed as methylated here if at least one of the genes in the DMR was previously characterized as methylated
Chr5	18187420	18187913	18187512	18187777	AT5G45070:three_prime_UTR,CDS;AT5TE65520:transposable_element;	AT5G45070:three_prime_UTR;AT5TE65520:transposable_element;	0.256978	0.114944	hyper	hyper	no	no	UM
Chr5	8893174	8893658	8893146	8893866	Intergenic	Intergenic	0.24176	0.292785	hyper	hyper	no	yes	n/a
Chr3	5419153	5419708	5419089	5419708	Intergenic	Intergenic	0.32621	0.220065	hyper	hyper	no	no	n/a
Chr3	8998405	8998649	8998405	8998519	AT3G24650:CDS;	AT3G24650:CDS;	0.172803	0.112941	hyper	hyper	yes	yes	UM
Chr4	9063913	9064251	9063913	9064276	AT4G16000:three_prime_UTR,CDS;AT4TE40670:transposable_element;	AT4G16000:three_prime_UTR,CDS;AT4TE40670:transposable_element;	0.183428	0.439746	hyper	hyper	no	yes	UM
Chr1	26973666	26973918	26973436	26973949	AT1G71710:three_prime_UTR,CDS;	AT1G71697:three_prime_UTR;AT1G71700:tRNA;AT1G71710:three_prime_UTR,CDS;	0.201484	0.306875	hyper	hyper	no	yes	CG-gbm (the 10% ATGs were all unmethylated however)	**
Chr3	5053638	5053945	5053638	5053945	AT3G15010:CDS;	AT3G15010:CDS;	0.236744	0.303677	hyper	hyper	no	yes	UM
Chr2	12752049	12752207	12752049	12752116	AT2G29910:CDS;	AT2G29910:CDS;	0.226047	0.172423	hyper	hyper	no	no	UM
Chr3	4092866	4093195	4092866	4093195	AT3G12860:CDS;	AT3G12860:CDS;	0.357576	0.355296	hyper	hyper	no	no	UM
Chr4	112525	113165	112525	113029	AT4G00250:three_prime_UTR,CDS;	AT4G00250:three_prime_UTR,CDS;	0.319461	0.281405	hyper	hyper	no	no	UM
Chr1	24719011	24719334	24719024	24719400	AT1TE81195:transposable_element;AT1TE81200:transposable_element;AT1TE81205:transposable_element;	AT1TE81195:transposable_element;AT1TE81200:transposable_element;AT1TE81205:transposable_element;	0.220314	0.267789	hyper	hyper	no	no	n/a
Chr3	21647941	21648191	21647886	21648191	AT3G58530:CDS;	AT3G58530:CDS;	0.20202	0.252164	hyper	hyper	no	yes	UM
Chr1	26650727	26650896	26650806	26650867	AT1TE87255:transposable_element;	AT1TE87255:transposable_element;	0.287756	0.184088	hyper	hyper	no	no	n/a
Chr3	21232202	21232763	21232412	21232503	Intergenic	Intergenic	0.4508	0.244197	hyper	hyper	no	no	n/a
Chr3	2710566	2710781	2710694	2710884	AT3G08910:CDS;	AT3G08910:CDS;	0.171983	0.145841	hyper	hyper	no	no	UM
Chr3	21093259	21093525	21093472	21093667	AT3G57000:CDS;	AT3G57000:CDS;	0.274411	0.128675	hyper	hyper	no	no	UM
Chr5	12662383	12662595	12661960	12662574	AT5G33390:CDS;	AT5G33390:five_prime_UTR,CDS;	0.204799	0.234614	hyper	hyper	yes	yes	CHG-gene
Chr2	1002224	1002495	1002093	1002561	AT2TE04485:transposable_element;	AT2TE04485:transposable_element;	0.232575	0.26786	hyper	hyper	no	no	n/a
Chr2	13578904	13579399	13578904	13579320	Intergenic	Intergenic	0.305014	0.257177	hyper	hyper	no	no	n/a
Chr2	2982032	2982220	2982099	2982220	AT2G07180:CDS;	AT2G07180:CDS;	0.256628	0.115223	hyper	hyper	no	no	UM
Chr2	10365785	10365939	10365785	10365939	AT2G24360:CDS;	AT2G24360:CDS;	0.152551	0.216287	hyper	hyper	no	no	UM
Chr1	24658862	24659409	24658862	24659343	AT1TE80995:transposable_element;	AT1TE80995:transposable_element;	0.23471	0.186465	hyper	hyper	no	no	n/a
Chr4	418251	418565	418251	418345	AT4G00970:CDS;AT4TE02165:transposable_element;	AT4TE02165:transposable_element;	0.15538	0.156845	hyper	hyper	no	no	UM
Chr1	9931450	9931853	9931376	9931573	AT1G28323:transposable_element_gene;AT1TE32015:transposable_element;	AT1G28323:transposable_element_gene;AT1TE32015:transposable_element;	0.207991	0.294267	hyper	hyper	yes	no	n/a
Chr3	3259886	3260454	3259886	3260369	AT3G10470:five_prime_UTR,CDS;	AT3G10470:five_prime_UTR;	0.213342	0.132777	hyper	hyper	no	no	UM
Chr2	13717270	13717546	13717270	13717578	AT2G32291:pseudogene;	AT2G32291:pseudogene;	0.30423	0.409937	hyper	hyper	yes	yes	n/a
Chr3	2747690	2747843	2747636	2747779	AT3G09000:CDS;	AT3G09000:CDS;	0.1792	0.115683	hyper	hyper	no	no	UM
Chr5	25466666	25466869	25466666	25466869	AT5G63620:CDS;	AT5G63620:CDS;	0.304891	0.352073	hyper	hyper	no	no	UM
Chr5	19884203	19884312	19884189	19884255	AT5G49050:CDS;	AT5G49050:CDS;	0.193237	0.19021	hyper	hyper	no	no	UM
Chr3	8294481	8295240	8294724	8295148	Intergenic	Intergenic	0.230524	0.237832	hyper	hyper	no	no	n/a
Chr5	3394815	3395162	3394891	3395162	AT5G10740:CDS;	AT5G10740:CDS;	0.178789	0.231348	hyper	hyper	no	no	UM
Chr5	1630154	1630578	1630154	1630734	AT5G05500:three_prime_UTR,CDS;AT5G05510:three_prime_UTR;	AT5G05500:three_prime_UTR,CDS;AT5G05510:three_prime_UTR,CDS;	0.182332	0.270478	hyper	hyper	no	yes	UM
Chr4	9961068	9961616	9960870	9961616	AT4TE45210:transposable_element;	AT4TE45200:transposable_element;AT4TE45205:transposable_element;AT4TE45210:transposable_element;	0.329576	0.286924	hyper	hyper	no	no	n/a
Chr3	19760955	19761229	19760955	19761194	AT3G53300:CDS;	AT3G53300:CDS;	0.108035	0.105691	hyper	hyper	no	no	UM
Chr5	15132470	15132696	15132470	15132661	AT5G37980:CDS;	AT5G37980:CDS;	0.201166	0.169952	hyper	hyper	no	no	UM
Chr3	21257022	21257332	21257014	21257332	AT3G57430:CDS;	AT3G57430:CDS;	0.162764	0.233405	hyper	hyper	no	no	UM
Chr3	8199477	8200075	8199477	8200075	AT3TE34375:transposable_element;	AT3TE34375:transposable_element;	0.284482	0.295573	hyper	hyper	no	no	n/a
ChrM	73627	74003	73747	73892	no match	no match	0.422501	0.296777	hyper	hyper	no	no	n/a
Chr5	8374357	8374541	8374477	8374541	AT5TE30275:transposable_element;	AT5TE30275:transposable_element;	0.177564	0.138737	hyper	hyper	no	no	n/a
Chr3	18880498	18880702	18880527	18880702	AT3G50790:CDS;	AT3G50790:CDS;	0.334291	0.21689	hyper	hyper	no	no	UM
Chr3	13066772	13066966	13066772	13066966	AT3TE53550:transposable_element;	AT3TE53550:transposable_element;	0.16375	0.184828	hyper	hyper	no	no	n/a
Chr5	18602108	18602686	18602325	18602540	AT5TE66960:transposable_element;	AT5TE66960:transposable_element;	0.220963	0.204221	hyper	hyper	no	no	n/a
Chr4	15373312	15373457	15373393	15373423	Intergenic	Intergenic	0.267851	0.179209	hyper	hyper	no	no	n/a
Chr3	12785648	12785941	12785885	12785941	AT3G31425:pseudogene;	AT3G31425:pseudogene;	0.217318	0.162998	hyper	hyper	no	no	n/a
Chr3	5629216	5629653	5629092	5629653	Intergenic	Intergenic	0.296575	0.246681	hyper	hyper	no	no	n/a
Chr3	485253	485692	485493	485692	AT3G02370:CDS;	AT3G02370:CDS;	0.129309	0.157219	hyper	hyper	no	no	UM
Chr2	8897943	8898103	8897943	8898103	AT2G20630:CDS;	AT2G20630:CDS;	0.160911	0.138401	hyper	hyper	no	no	UM
Chr1	18913830	18914234	18913845	18914233	Intergenic	Intergenic	0.166268	0.113038	hyper	hyper	no	no	n/a
Chr1	9168612	9169061	9168812	9168940	AT1G26540:CDS;	AT1G26540:CDS;	0.263036	0.143158	hyper	hyper	no	no	UM
Chr3	7502480	7502920	7502480	7502805	AT3TE31510:transposable_element;	AT3TE31510:transposable_element;	0.185324	0.199837	hyper	hyper	no	no	n/a
Chr5	17276625	17276822	17276625	17276796	AT5TE62445:transposable_element;	AT5TE62445:transposable_element;	0.330714	0.309924	hyper	hyper	no	no	n/a
Chr4	18506496	18506636	18506496	18506636	AT4G39890:CDS;	AT4G39890:CDS;	0.241073	0.195656	hyper	hyper	no	no	UM
Chr1	4209721	4210083	4209721	4209871	Intergenic	Intergenic	0.420533	0.231139	hyper	hyper	no	no	n/a
Chr2	6691282	6691525	6691316	6691525	AT2TE27335:transposable_element;	AT2TE27335:transposable_element;	0.169333	0.212162	hyper	hyper	no	no	n/a
Chr5	7780808	7780987	7780866	7780987	Intergenic	Intergenic	0.101146	0.124291	hyper	hyper	no	no	n/a
Chr3	18686978	18687132	18686939	18687221	AT3G50380:CDS;	AT3G50380:CDS;	0.189973	0.214661	hyper	hyper	no	no	CG-gbm
Chr2	19497013	19497362	19497013	19497016	AT2G47500:CDS;	AT2G47500:CDS;	0.245412	0.355961	hyper	hyper	no	no	UM
Chr2	18242926	18243133	18242926	18243133	AT2G44100:CDS;	AT2G44100:CDS;	0.179308	0.129794	hyper	hyper	no	no	UM
ChrM	157938	158116	157938	158237	no match	no match	0.177815	0.211282	hyper	hyper	no	no	n/a
Chr4	10871589	10871674	10871589	10871674	AT4G20095:three_prime_UTR;AT4TE49845:transposable_element;	AT4G20095:three_prime_UTR;AT4TE49845:transposable_element;	0.160363	0.251965	hyper	hyper	no	no	UM
Chr4	12788064	12788364	12788063	12788364	AT4G24810:CDS;	AT4G24810:CDS;	0.137831	0.192581	hyper	hyper	no	no	UM
Chr3	23336815	23336979	23336784	23336895	AT3G63180:CDS;	AT3G63180:CDS;	0.196165	0.188454	hyper	hyper	no	no	UM
Chr5	6883292	6883539	6883079	6883539	AT5G20360:CDS;	AT5G20360:CDS;	0.24849	0.186874	hyper	hyper	no	no	UM
Chr1	6155017	6155126	6154892	6155219	AT1G17890:CDS;	AT1G17890:CDS;	0.103104	0.202992	hyper	hyper	no	yes	CG-gbm
Chr3	1308606	1308810	1308668	1308728	Intergenic	Intergenic	0.204154	0.164319	hyper	hyper	no	no	n/a
Chr4	13925790	13926065	13925722	13926065	AT4G28000:CDS;	AT4G28000:CDS;	0.148723	0.148711	hyper	hyper	no	no	UM
Chr2	18920695	18921107	18920978	18921022	AT2G45990:three_prime_UTR,CDS;AT2G46000:three_prime_UTR;	AT2G45990:three_prime_UTR,CDS;	0.15256	0.143587	hyper	hyper	no	no	UM
Chr2	9575809	9576103	9575852	9576196	AT2G22530:CDS;	AT2G22530:CDS;	0.174457	0.159532	hyper	hyper	no	no	UM
Chr4	7752286	7752669	7751961	7752530	AT4G13310:CDS;AT4TE33970:transposable_element;AT4TE33975:transposable_element;	AT4G13310:CDS;AT4TE33970:transposable_element;AT4TE33975:transposable_element;	0.204042	0.137794	hyper	hyper	no	no	UM
Chr3	22004768	22004973	22004768	22004900	AT3G59570:CDS;	AT3G59570:CDS;	0.154487	0.12876	hyper	hyper	no	no	UM
Chr3	9428634	9429129	9428907	9429129	AT3TE39380:transposable_element;	AT3TE39380:transposable_element;	0.299997	0.251996	hyper	hyper	no	no	n/a
Chr5	13984631	13984762	13984665	13984762	AT5TE49850:transposable_element;	AT5TE49850:transposable_element;	0.248735	0.219811	hyper	hyper	no	no	n/a
Chr1	10109910	10110350	10109910	10109975	AT1G28960:three_prime_UTR,CDS;	AT1G28960:three_prime_UTR;	0.23294	0.15061	hyper	hyper	no	no	UM
Chr5	20649346	20649610	20649346	20649631	AT5TE74390:transposable_element;	AT5TE74390:transposable_element;AT5TE74395:transposable_element;	0.322459	0.389772	hyper	hyper	no	no	n/a
Chr3	1122038	1122155	1122064	1122205	AT3G04250:CDS;	AT3G04250:CDS;	0.186339	0.175988	hyper	hyper	no	no	UM
Chr2	7695979	7696394	7695979	7696394	AT2TE31730:transposable_element;	AT2TE31730:transposable_element;	0.267021	0.284614	hyper	hyper	no	no	n/a
Chr1	9438241	9438443	9438209	9438443	AT1G27170:CDS;	AT1G27170:CDS;	0.344578	0.443106	hyper	hyper	no	no	UM
Chr1	26926013	26926155	26926013	26926155	Intergenic	Intergenic	0.242783	0.295163	hyper	hyper	no	no	n/a
Chr5	8595684	8595807	8595684	8595861	AT5G24950:CDS;	AT5G24950:CDS;	0.109026	0.206204	hyper	hyper	no	no	UM
Chr5	18647516	18647791	18647711	18647790	Intergenic	Intergenic	0.285594	0.184752	hyper	hyper	no	no	n/a
Chr1	28285935	28286078	28285935	28285987	Intergenic	Intergenic	0.221725	0.207556	hyper	hyper	no	no	n/a
Chr2	1277864	1277949	1277864	1277949	Intergenic	Intergenic	0.300357	0.263449	hyper	hyper	no	no	n/a
Chr5	13441319	13441509	13441404	13441509	Intergenic	Intergenic	0.143644	0.135902	hyper	hyper	no	no	n/a
Chr3	8245592	8245943	8245592	8245943	Intergenic	Intergenic	0.240328	0.410297	hyper	hyper	no	no	n/a
Chr1	19635937	19636287	19635937	19636287	AT1TE64940:transposable_element;AT1TE64945:transposable_element;	AT1TE64940:transposable_element;AT1TE64945:transposable_element;	0.234246	0.401451	hyper	hyper	no	no	n/a
Chr4	9307421	9307548	9307421	9307548	AT4G16520:CDS;	AT4G16520:CDS;	0.170059	0.158065	hyper	hyper	no	no	UM
Chr1	26406814	26406977	26406814	26406977	AT1G70110:CDS;	AT1G70110:CDS;	0.177227	0.209621	hyper	hyper	no	no	UM
Chr3	5643095	5643493	5643095	5643308	AT3TE23710:transposable_element;AT3TE23715:transposable_element;	AT3TE23710:transposable_element;AT3TE23715:transposable_element;	0.204374	0.402717	hyper	hyper	no	no	n/a
Chr5	19098901	19099181	19098901	19099181	AT5TE68690:transposable_element;	AT5TE68690:transposable_element;	0.231505	0.173744	hyper	hyper	no	no	n/a
Chr4	9526623	9526822	9526637	9526822	Intergenic	Intergenic	0.223953	0.225526	hyper	hyper	no	no	n/a
Chr3	16647349	16647521	16647366	16647488	AT3TE67445:transposable_element;	AT3TE67445:transposable_element;	0.171025	0.145476	hyper	hyper	no	no	n/a
Chr4	15124484	15124728	15124572	15124677	AT4G31100:CDS;	AT4G31100:CDS;	0.136625	0.122497	hyper	hyper	yes	no	UM
Chr3	5726271	5726514	5726271	5726514	AT3G16810:CDS;	AT3G16810:CDS;	0.197615	0.245241	hyper	hyper	no	no	UM
Chr5	15784301	15784600	15784301	15784490	AT5G39440:CDS;	AT5G39440:CDS;	0.205289	0.172	hyper	hyper	no	no	UM
Chr5	9293011	9293229	9292955	9293012	AT5G26740:CDS;	AT5G26740:CDS;	0.173689	0.107401	hyper	hyper	no	no	UM
Chr1	21865763	21865977	21865725	21865978	AT1G59520:CDS;	AT1G59520:CDS;	0.12962	0.195756	hyper	hyper	no	no	UM
Chr3	16635507	16635837	16635616	16635728	AT3TE67440:transposable_element;AT3TE67445:transposable_element;	AT3TE67440:transposable_element;	0.210649	0.168568	hyper	hyper	no	no	n/a
Chr5	884794	884963	884794	884963	AT5G03520:CDS;	AT5G03520:CDS;	0.196703	0.13008	hyper	hyper	no	no	UM
Chr3	11128903	11129054	11128903	11128956	AT3G29160:three_prime_UTR,CDS;	AT3G29160:three_prime_UTR,CDS;	0.164205	0.161081	hyper	hyper	no	yes	CG-gbm
Chr3	2872151	2872298	2872151	2872249	AT3G09350:CDS;	AT3G09350:CDS;	0.135508	0.151594	hyper	hyper	no	no	UM
Chr5	4253133	4253257	4253081	4253257	AT5G13290:CDS;	AT5G13290:three_prime_UTR,CDS;	0.121844	0.188654	hyper	hyper	no	no	UM
Chr4	12957014	12957339	12957014	12957339	AT4TE60630:transposable_element;	AT4TE60630:transposable_element;	0.278969	0.13674	hyper	hyper	no	no	n/a
Chr5	13367249	13367323	13367184	13367350	AT5TE47360:transposable_element;	AT5G35111:pseudogene;AT5TE47360:transposable_element;	0.105384	0.160774	hyper	hyper	no	no	n/a
Chr1	10823203	10823413	10823139	10823449	AT1G30550:CDS;	AT1G30550:CDS;	0.141206	0.137979	hyper	hyper	no	no	UM
Chr4	7113254	7113432	7113362	7113432	AT4TE30880:transposable_element;	AT4TE30880:transposable_element;	0.261242	0.22064	hyper	hyper	no	no	n/a
Chr1	1993074	1993150	1993074	1993150	AT1G06510:CDS;	AT1G06510:CDS;	0.165394	0.306043	hyper	hyper	no	no	UM
Chr5	10798325	10798439	10798325	10798439	Intergenic	Intergenic	0.219085	0.141298	hyper	hyper	no	no	n/a
Chr5	510288	510436	510313	510436	AT5G02390:CDS;	AT5G02390:CDS;	0.159855	0.186272	hyper	hyper	no	no	UM
Chr4	6359823	6359890	6359772	6359939	AT4G10201:pseudogene;AT4G10210:CDS;AT4TE27090:transposable_element;	AT4G10201:pseudogene;AT4G10210:CDS;AT4TE27090:transposable_element;	0.248127	0.446568	hyper	hyper	no	no	n/a
Chr4	12250272	12250539	12250272	12250643	AT4G23470:CDS;	AT4G23470:CDS;	0.12168	0.140662	hyper	hyper	no	no	UM
Chr2	17786708	17786874	17786708	17786756	AT2G42720:CDS;	AT2G42720:CDS;	0.205634	0.197733	hyper	hyper	no	no	UM
Chr3	20364164	20364323	20364239	20364323	AT3G54960:CDS;	AT3G54960:CDS;	0.167677	0.145826	hyper	hyper	no	no	UM
Chr1	29208295	29208440	29208295	29208342	AT1TE95555:transposable_element;	AT1TE95555:transposable_element;	0.341964	0.250645	hyper	hyper	no	no	n/a
Chr3	19537499	19537756	19537499	19537653	AT3G52700:CDS;AT3TE79320:transposable_element;	AT3G52700:CDS;AT3TE79320:transposable_element;	0.21754	0.177741	hyper	hyper	no	no	CHH-gene
Chr2	17602083	17602259	17602083	17602250	AT2G42260:three_prime_UTR,CDS;	AT2G42260:three_prime_UTR,CDS;	0.218826	0.134536	hyper	hyper	no	no	UM
Chr1	27126313	27126488	27126093	27126488	AT1G72090:CDS;	AT1G72090:CDS;	0.167375	0.145886	hyper	hyper	yes	yes	UM
Chr4	11759493	11759613	11759472	11759613	AT4G22220:CDS;	AT4G22220:CDS;	0.192245	0.355923	hyper	hyper	no	no	UM
Chr2	7328907	7329313	7328907	7329232	AT2G16905:pseudogene;	AT2G16905:pseudogene;	0.139028	0.11646	hyper	hyper	no	no	n/a
Chr1	9416413	9416501	9416413	9416501	AT1G27110:CDS;AT1TE30350:transposable_element;	AT1G27110:CDS;AT1TE30350:transposable_element;	0.284663	0.405172	hyper	hyper	no	no	UM
Chr4	13255894	13256019	13255894	13256000	AT4G26160:CDS;	AT4G26160:CDS;	0.142092	0.163174	hyper	hyper	no	no	CG-gbm
Chr5	10865887	10865997	10865887	10865912	AT5TE39480:transposable_element;	AT5TE39480:transposable_element;	0.169974	0.150921	hyper	hyper	no	no	n/a
Chr1	21323304	21323409	21323334	21323491	AT1G57570:CDS;	AT1G57570:CDS;	0.104767	0.116233	hyper	hyper	no	no	UM
Chr1	5897821	5897912	5897821	5898016	AT1G17240:CDS;	AT1G17240:CDS;	0.11284	0.117966	hyper	hyper	no	no	UM
Chr5	13827623	13827907	13827623	13827907	AT5TE49295:transposable_element;	AT5TE49295:transposable_element;	0.333644	0.279561	hyper	hyper	no	no	n/a
Chr3	17550299	17550402	17550009	17550533	AT3G47610:CDS;	AT3G47610:CDS;	0.146545	0.240607	hyper	hyper	no	yes	UM
Chr3	8903373	8903675	8903537	8903704	Intergenic	Intergenic	0.146664	0.143955	hyper	hyper	no	no	n/a
Chr1	18084820	18085056	18084721	18085269	AT1G48900:three_prime_UTR,CDS;	AT1G48900:three_prime_UTR,CDS;	0.103342	0.119562	hyper	hyper	no	yes	UM
Chr1	24223512	24223729	24223512	24223631	Intergenic	Intergenic	0.236267	0.231032	hyper	hyper	no	no	n/a
Chr4	16540064	16540323	16539960	16540270	AT4G34640:CDS;	AT4G34640:CDS;	0.13876	0.164998	hyper	hyper	no	no	UM
Chr3	21197030	21197243	21196959	21197148	AT3G57290:CDS;	AT3G57290:CDS;	0.179938	0.183349	hyper	hyper	no	no	UM
Chr2	6578730	6578994	6578730	6579063	AT2TE26860:transposable_element;AT2TE26865:transposable_element;	AT2TE26860:transposable_element;AT2TE26865:transposable_element;	0.111385	0.130548	hyper	hyper	no	no	n/a
Chr2	7805415	7805985	7805563	7805848	AT2TE32265:transposable_element;	AT2TE32265:transposable_element;	0.338979	0.344014	hyper	hyper	no	no	n/a
Chr1	8661279	8661376	8661263	8661647	Intergenic	Intergenic	0.211234	0.220912	hyper	hyper	no	no	n/a
Chr5	19199159	19199217	19199089	19199286	AT5G47300:CDS;	AT5G47300:CDS;	0.179669	0.295809	hyper	hyper	no	yes	UM
Chr3	17307564	17307798	17307449	17307789	AT3G46980:three_prime_UTR,CDS;	AT3G46980:three_prime_UTR,CDS;	0.142963	0.18275	hyper	hyper	no	no	UM
Chr3	2913626	2913741	2913626	2913741	AT3G09470:CDS;	AT3G09470:CDS;	0.206753	0.131843	hyper	hyper	no	no	UM
Chr3	7689765	7689950	7689815	7689950	AT3G21820:CDS;	AT3G21820:CDS;	0.219088	0.182814	hyper	hyper	no	no	UM
Chr5	10724417	10724661	10724417	10724500	AT5TE39035:transposable_element;	AT5TE39035:transposable_element;	0.166911	0.130158	hyper	hyper	no	no	n/a
Chr5	25115458	25115682	25115346	25115480	AT5G62570:CDS;	AT5G62570:CDS;	0.13319	0.130872	hyper	hyper	no	no	UM
Chr3	22703207	22703272	22703230	22703272	AT3G61350:CDS;	AT3G61350:CDS;	0.252512	0.101784	hyper	hyper	no	no	UM
Chr1	8125668	8125727	8125465	8125677	AT1G22950:CDS;	AT1G22950:CDS;	0.111373	0.132676	hyper	hyper	no	no	UM
Chr1	11427495	11427618	11427611	11427618	Intergenic	Intergenic	0.131031	0.118292	hyper	hyper	no	no	n/a
Chr3	2923167	2923351	2923232	2923278	AT3G09510:CDS;AT3TE12275:transposable_element;	AT3G09510:CDS;AT3TE12275:transposable_element;	0.275216	0.175889	hyper	hyper	no	no	CHH-gene
Chr5	9718810	9718952	9718793	9718882	AT5G27530:CDS;AT5TE35280:transposable_element;	AT5G27530:CDS;	0.175075	0.19236	hyper	hyper	no	no	UM
Chr3	10131273	10131365	10131082	10131365	AT3G27380:CDS;	AT3G27380:three_prime_UTR,CDS;	0.14466	0.191142	hyper	hyper	no	yes	UM
Chr1	6593789	6594190	6593789	6594190	AT1TE21370:transposable_element;	AT1TE21370:transposable_element;	0.104601	0.305889	hyper	hyper	no	no	n/a
Chr2	10739069	10739105	10739069	10739105	Intergenic	Intergenic	0.310684	0.119062	hyper	hyper	no	no	n/a
Chr3	18257519	18257644	18257463	18257644	AT3G49240:CDS;AT3TE74080:transposable_element;	AT3G49240:CDS;AT3TE74080:transposable_element;	0.139188	0.292458	hyper	hyper	no	no	UM
Chr3	22034596	22034749	22034596	22034605	AT3G59660:CDS;	AT3G59660:CDS;	0.164762	0.187474	hyper	hyper	no	yes	UM
Chr3	22465157	22465296	22465157	22465242	AT3G60790:CDS;	AT3G60790:CDS;	0.171425	0.179924	hyper	hyper	no	no	UM
Chr2	17583929	17583993	17583929	17583993	AT2G42190:CDS;AT2TE79400:transposable_element;	AT2G42190:CDS;AT2TE79400:transposable_element;	0.21853	0.246554	hyper	hyper	no	no	UM
ChrM	162068	162178	162068	162247	no match	no match	0.199125	0.201708	hyper	hyper	no	no	n/a
Chr5	6360940	6361000	6360978	6361000	Intergenic	Intergenic	0.177889	0.140459	hyper	hyper	no	no	n/a
Chr1	7665605	7665711	7665696	7665862	AT1G21835:CDS;	AT1G21835:CDS;	0.182752	0.180462	hyper	hyper	no	no	CHH-gene
Chr2	10516458	10516721	10516458	10516672	AT2TE45130:transposable_element;	AT2TE45130:transposable_element;	0.14883	0.145135	hyper	hyper	no	no	n/a
Chr5	21552823	21552978	21552823	21552978	Intergenic	Intergenic	0.296315	0.205648	hyper	hyper	no	no	n/a
Chr4	16485992	16486061	16486037	16486061	AT4G34490:CDS;	AT4G34490:CDS;	0.307535	0.195749	hyper	hyper	no	no	UM
Chr5	24038381	24038754	24038694	24038754	AT5G59660:CDS;	AT5G59660:CDS;	0.153857	0.125697	hyper	hyper	yes	no	UM
Chr1	21445295	21445388	21445139	21445388	AT1TE70785:transposable_element;	AT1TE70785:transposable_element;	0.206516	0.177957	hyper	hyper	no	no	n/a
Chr3	19397406	19397672	19397406	19397672	AT3G52300:CDS;	AT3G52300:CDS;	0.225037	0.183579	hyper	hyper	no	no	UM
Chr1	24697164	24697407	24697088	24697214	AT1G66260:CDS;	AT1G66260:CDS;	0.123832	0.125207	hyper	hyper	no	no	UM
Chr1	20773645	20773732	20773645	20773732	AT1TE68605:transposable_element;	AT1TE68605:transposable_element;	0.194138	0.214841	hyper	hyper	no	no	n/a
Chr4	16436708	16436830	16436785	16436830	AT4G34370:CDS;	AT4G34370:CDS;	0.145285	0.10871	hyper	hyper	no	no	CG-gbm
Chr5	23139952	23140072	23139929	23140072	AT5TE83215:transposable_element;	AT5TE83215:transposable_element;	0.123993	0.121474	hyper	hyper	no	no	n/a
Chr2	10677882	10678075	10677882	10678075	AT2TE45780:transposable_element;	AT2TE45780:transposable_element;	0.260675	0.296802	hyper	hyper	no	no	n/a
Chr4	9860480	9860620	9860480	9860552	AT4TE44740:transposable_element;	AT4TE44740:transposable_element;	0.293273	0.182323	hyper	hyper	no	no	n/a
Chr3	16326532	16326681	16326432	16326681	Intergenic	Intergenic	0.19065	0.210645	hyper	hyper	no	no	n/a
Chr1	8291212	8291288	8291212	8291288	AT1TE26735:transposable_element;	AT1TE26735:transposable_element;	0.185821	0.120309	hyper	hyper	no	no	n/a
Chr2	5917689	5917777	5917722	5917748	AT2TE24110:transposable_element;	AT2TE24110:transposable_element;	0.136254	0.108488	hyper	hyper	no	no	n/a
Chr5	16056410	16056657	16056410	16056657	AT5TE57975:transposable_element;	AT5TE57975:transposable_element;	0.198206	0.291408	hyper	hyper	no	no	n/a
Chr5	2335261	2335366	2335365	2335463	AT5G07380:CDS;	AT5G07380:CDS;	0.246758	0.189227	hyper	hyper	no	no	UM
Chr4	13528844	13529119	13529061	13529119	AT4G26930:CDS;	AT4G26930:CDS;	0.266683	0.212155	hyper	hyper	no	no	UM
Chr5	19332694	19332885	19332687	19332921	AT5G47720:CDS;	AT5G47720:CDS;	0.131998	0.147914	hyper	hyper	no	no	UM
Chr2	15161459	15161710	15161237	15161622	AT2G36110:five_prime_UTR;AT2TE67480:transposable_element;	AT2TE67480:transposable_element;	0.149202	0.134658	hyper	hyper	no	no	UM
Chr3	362864	363030	362864	363030	AT3G02070:CDS;	AT3G02070:CDS;	0.170751	0.176509	hyper	hyper	no	no	UM
Chr4	7763014	7763095	7763014	7763213	Intergenic	Intergenic	0.339341	0.333963	hyper	hyper	no	no	n/a
Chr1	20545337	20545435	20545323	20545388	AT1G55050:CDS;	AT1G55050:CDS;	0.120677	0.128948	hyper	hyper	no	no	UM
Chr3	17227657	17227772	17227657	17227731	AT3TE69820:transposable_element;	AT3TE69820:transposable_element;	0.149193	0.125338	hyper	hyper	no	no	n/a
Chr1	9147228	9147692	9147178	9148081	Intergenic	AT1TE29480:transposable_element;AT1TE29485:transposable_element;	0.246368	0.271863	hyper	hyper	no	no	n/a
Chr1	27603234	27603421	27603234	27603610	AT1G73410:three_prime_UTR;AT1TE90315:transposable_element;	AT1G73410:three_prime_UTR;AT1TE90315:transposable_element;	0.1414	0.166179	hyper	hyper	no	no	UM
Chr5	24622030	24622332	24622030	24622096	AT5G61200:three_prime_UTR,CDS;	AT5G61200:three_prime_UTR,CDS;	0.27992	0.133452	hyper	hyper	no	no	UM
Chr4	6394723	6394809	6394723	6394809	AT4G10310:CDS;AT4TE27260:transposable_element;	AT4G10310:CDS;AT4TE27260:transposable_element;	0.227258	0.189652	hyper	hyper	no	no	UM
Chr4	2807228	2807358	2807228	2807395	AT4G05520:CDS;	AT4G05520:CDS;	0.142807	0.14911	hyper	hyper	no	no	UM
Chr1	17559419	17559471	17559419	17559519	AT1G47710:CDS;	AT1G47710:CDS;	0.205601	0.230419	hyper	hyper	no	no	CG-gbm
Chr4	12950639	12950686	12950648	12950686	AT4G25310:CDS;	AT4G25310:CDS;	0.132736	0.103444	hyper	hyper	no	no	UM
ChrM	125420	125715	125420	125715	no match	no match	0.206134	0.399657	hyper	hyper	no	no	n/a
Chr1	30395969	30396054	30395969	30396054	AT1G80880:CDS;	AT1G80880:CDS;	0.12752	0.109019	hyper	hyper	no	no	UM
Chr1	19028325	19028555	19028325	19028555	AT1TE63045:transposable_element;	AT1TE63045:transposable_element;	0.24094	0.241224	hyper	hyper	no	no	n/a
Chr1	22863468	22863532	22863468	22863532	AT1G61860:CDS;	AT1G61860:CDS;	0.1216	0.127782	hyper	hyper	no	no	CG-gbm
Chr4	11247304	11247431	11247253	11247359	AT4G21065:CDS;	AT4G21065:CDS;	0.142765	0.174359	hyper	hyper	no	no	UM
Chr1	17328343	17328421	17328293	17328559	AT1G47270:CDS;	AT1G47270:CDS;	0.112523	0.179299	hyper	hyper	no	no	UM
Chr5	7153198	7153216	7153198	7153216	AT5TE25870:transposable_element;	AT5TE25870:transposable_element;	0.209511	0.233248	hyper	hyper	no	no	n/a
Chr5	24470421	24470515	24470331	24470515	AT5G60820:CDS;	AT5G60820:CDS;	0.169908	0.171654	hyper	hyper	no	no	UM
Chr1	13213954	13214155	13213954	13214124	AT1G35690:transposable_element_gene;AT1TE43150:transposable_element;AT1TE43155:transposable_element;	AT1TE43150:transposable_element;	0.272651	0.236743	hyper	hyper	no	no	n/a
Chr1	1990160	1990190	1990160	1990299	AT1G06500:five_prime_UTR,CDS;	AT1G06500:five_prime_UTR,CDS;	0.182666	0.234458	hyper	hyper	no	no	UM
Chr5	15900607	15900725	15900635	15900987	AT5G39720:three_prime_UTR;	AT5G39720:three_prime_UTR;	0.165978	0.246437	hyper	hyper	no	no	UM
Chr2	19092156	19092292	19092156	19092292	AT2G46510:CDS;	AT2G46510:CDS;	0.125233	0.132408	hyper	hyper	no	no	UM
Chr2	5320494	5320656	5320494	5320656	Intergenic	Intergenic	0.152368	0.191746	hyper	hyper	no	no	n/a
Chr1	25456832	25456942	25456832	25456942	Intergenic	Intergenic	0.225041	0.437065	hyper	hyper	no	no	n/a
Chr5	867777	867930	867896	867986	AT5G03470:CDS;	AT5G03470:CDS;	0.12281	0.130579	hyper	hyper	no	no	UM
Chr1	28750473	28750617	28750535	28750617	Intergenic	Intergenic	0.187009	0.185721	hyper	hyper	no	no	n/a
Chr4	16131963	16132140	16131963	16132140	AT4G33540:CDS;	AT4G33540:CDS;	0.172485	0.226214	hyper	hyper	no	no	UM
Chr5	2797199	2797320	2796979	2797320	AT5G08620:CDS;	AT5G08620:CDS;	0.178666	0.253399	hyper	hyper	no	no	UM
Chr5	19146505	19146570	19146505	19146694	AT5G47140:CDS;	AT5G47140:CDS;	0.20646	0.218099	hyper	hyper	no	no	UM
Chr5	13986331	13986539	13986331	13986539	AT5TE49855:transposable_element;	AT5TE49855:transposable_element;	0.214901	0.286282	hyper	hyper	no	no	n/a
Chr2	8037277	8037641	8037277	8037641	AT2TE33365:transposable_element;	AT2TE33365:transposable_element;	0.255615	0.278756	hyper	hyper	no	no	n/a
Chr2	594683	594714	594683	594714	AT2G02250:CDS;	AT2G02250:CDS;	0.142461	0.140216	hyper	hyper	no	no	UM
Chr4	15511284	15511486	15511230	15511486	Intergenic	Intergenic	0.183665	0.251788	hyper	hyper	no	no	n/a
Chr4	3939129	3939345	3939206	3939345	AT4G06701:ncRNA;	AT4G06701:ncRNA;	0.129396	0.112669	hyper	hyper	no	no	n/a
Chr3	16668177	16668312	16668303	16668367	AT3G45443:three_prime_UTR;	AT3G45443:three_prime_UTR;	0.138488	0.150569	hyper	hyper	no	no	UM
Chr1	25730262	25730332	25730262	25730310	AT1TE84370:transposable_element;	AT1TE84370:transposable_element;	0.281672	0.211022	hyper	hyper	no	no	n/a
Chr4	12639580	12639618	12639301	12639717	AT4G24450:CDS;	AT4G24450:CDS;	0.161538	0.227265	hyper	hyper	no	no	UM
Chr4	16804642	16804675	16804622	16804675	AT4G35310:three_prime_UTR;	AT4G35310:three_prime_UTR,CDS;	0.121266	0.140252	hyper	hyper	no	no	UM
Chr5	7181275	7181442	7181275	7181559	AT5TE25965:transposable_element;	AT5TE25965:transposable_element;	0.243199	0.29502	hyper	hyper	no	no	n/a
Chr2	12692206	12692489	12692206	12692489	AT2G29680:CDS;	AT2G29680:CDS;	0.180244	0.182659	hyper	hyper	no	no	UM
Chr1	26252171	26252326	26252171	26252194	AT1G69770:CDS;	AT1G69770:CDS;	0.206342	0.238297	hyper	hyper	no	no	UM
Chr4	6067258	6067371	6067202	6067394	Intergenic	Intergenic	0.182772	0.197141	hyper	hyper	yes	yes	n/a
Chr3	5226536	5226685	5226510	5226763	AT3G15480:CDS;	AT3G15480:CDS;	0.189569	0.24041	hyper	hyper	no	no	UM
Chr5	9349929	9350031	9349929	9350031	AT5TE33870:transposable_element;	AT5TE33870:transposable_element;	0.205187	0.196781	hyper	hyper	no	no	n/a
Chr1	5455807	5455817	5455593	5455817	AT1G15860:CDS;	AT1G15860:CDS;	0.164539	0.196574	hyper	hyper	no	no	UM
Chr1	20069539	20069624	20069481	20069624	AT1G53760:CDS;	AT1G53760:CDS;	0.119197	0.168058	hyper	hyper	no	no	UM
Chr1	18994412	18994874	18994412	18994753	AT1TE62915:transposable_element;	AT1TE62915:transposable_element;	0.170484	0.159139	hyper	hyper	no	no	n/a
Chr4	18367721	18367769	18367721	18367769	AT4G39500:CDS;	AT4G39500:CDS;	0.150223	0.169805	hyper	hyper	no	no	UM
Chr1	7981189	7981335	7981253	7981518	AT1G22580:transposable_element_gene;AT1TE25665:transposable_element;AT1TE25670:transposable_element;	AT1G22580:transposable_element_gene;AT1TE25665:transposable_element;AT1TE25670:transposable_element;	0.199589	0.233148	hyper	hyper	no	no	n/a
Chr5	23046955	23046980	23046912	23047050	AT5G56970:CDS;	AT5G56970:CDS;	0.17334	0.196025	hyper	hyper	no	no	UM
Chr1	17856699	17856808	17856600	17856808	Intergenic	Intergenic	0.140289	0.16433	hyper	hyper	no	no	n/a
Chr1	21189224	21189263	21189224	21189263	Intergenic	Intergenic	0.163146	0.181945	hyper	hyper	no	no	n/a
Chr5	9525993	9526462	9526273	9526462	AT5TE34605:transposable_element;	AT5TE34605:transposable_element;	0.312094	0.336721	hyper	hyper	no	no	n/a
Chr5	17775745	17775992	17775745	17775895	AT5TE64195:transposable_element;	AT5TE64195:transposable_element;	0.198659	0.154305	hyper	hyper	no	no	n/a
Chr4	6490606	6490677	6490548	6490741	Intergenic	Intergenic	0.140659	0.144968	hyper	hyper	no	no	n/a
Chr4	8204725	8204785	8204626	8204785	AT4G14240:CDS;	AT4G14240:three_prime_UTR,CDS;	0.204528	0.206669	hyper	hyper	no	no	UM
Chr4	1211749	1211989	1211749	1211989	AT4TE06200:transposable_element;	AT4TE06200:transposable_element;	0.186547	0.196663	hyper	hyper	no	no	n/a
Chr5	26595173	26595238	26595173	26595238	AT5G66630:CDS;	AT5G66630:CDS;	0.130485	0.129426	hyper	hyper	no	no	UM
Chr1	29916554	29916594	29916383	29916594	AT1G79530:CDS;	AT1G79529:ncRNA;AT1G79530:CDS;	0.105688	0.171216	hyper	hyper	no	no	CG-gbm
Chr4	11932474	11932616	11932474	11932791	AT4TE55215:transposable_element;AT4TE55220:transposable_element;	AT4TE55215:transposable_element;AT4TE55220:transposable_element;	0.17571	0.223105	hyper	hyper	no	no	n/a
Chr1	20776889	20777049	20776889	20777049	Intergenic	Intergenic	0.137555	0.255483	hyper	hyper	no	no	n/a
Chr1	23058011	23058034	23058011	23058154	AT1G62350:mRNA;AT1G62355:miRNA;	AT1G62350:three_prime_UTR;AT1G62355:miRNA;	0.177841	0.229373	hyper	hyper	no	no	UM
Chr1	10922267	10922358	10922035	10922268	Intergenic	Intergenic	0.147166	0.113835	hyper	hyper	no	no	n/a
Chr3	22719931	22719971	22719816	22719971	AT3G61400:CDS;	AT3G61400:CDS;	0.118059	0.184078	hyper	hyper	no	no	UM
Chr3	20233465	20233517	20233516	20233606	AT3TE82235:transposable_element;	AT3TE82235:transposable_element;AT3TE82240:transposable_element;	0.12769	0.124622	hyper	hyper	no	no	n/a
Chr4	6481860	6481964	6481818	6481964	Intergenic	Intergenic	0.140452	0.185026	hyper	hyper	no	no	n/a
Chr3	4405105	4405239	4405105	4405469	AT3G13510:CDS;	AT3G13510:CDS;	0.117994	0.107983	hyper	hyper	no	no	UM
Chr2	8196174	8196222	8196030	8196314	AT2G18915:CDS;	AT2G18915:CDS;	0.132524	0.149947	hyper	hyper	no	no	CG-gbm
Chr3	17627334	17627476	17627334	17627558	AT3G47780:CDS;	AT3G47780:CDS;	0.15865	0.171369	hyper	hyper	no	no	UM
Chr5	4462123	4462180	4462143	4462265	AT5G13820:CDS;	AT5G13820:CDS;	0.105889	0.120219	hyper	hyper	no	no	UM
Chr4	12874021	12874039	12873898	12874039	AT4G25070:CDS;	AT4G25070:CDS;	0.133947	0.293668	hyper	hyper	no	no	UM
Chr5	26276978	26277339	26276978	26277094	AT5TE94620:transposable_element;	AT5TE94620:transposable_element;	0.170432	0.145427	hyper	hyper	no	no	n/a
Chr5	20513254	20513375	20513150	20513375	AT5G50375:CDS;	AT5G50375:CDS;	0.151668	0.123309	hyper	hyper	no	no	UM
Chr4	8377585	8377643	8377585	8377703	AT4G14600:CDS;	AT4G14600:CDS;	0.293707	0.237187	hyper	hyper	no	no	UM
Chr1	20484183	20484215	20484067	20484330	AT1G54940:CDS;	AT1G54940:CDS;	0.171279	0.387903	hyper	hyper	no	no	UM
Chr5	17430089	17430440	17430375	17430498	AT5TE62960:transposable_element;	Intergenic	0.131845	0.114819	hyper	hyper	no	no	n/a
Chr3	8883146	8883371	8883146	8883371	AT3TE37150:transposable_element;AT3TE37155:transposable_element;	AT3TE37150:transposable_element;AT3TE37155:transposable_element;	0.132755	0.157697	hyper	hyper	no	no	n/a
Chr3	1166196	1166327	1166196	1166327	Intergenic	Intergenic	0.123824	0.189893	hyper	hyper	no	no	n/a
Chr5	13366208	13366312	13366113	13366312	AT5G35111:pseudogene;AT5TE47355:transposable_element;	AT5G35111:pseudogene;AT5TE47355:transposable_element;	0.153356	0.238125	hyper	hyper	no	no	n/a
Chr1	28011021	28011080	28011021	28011233	AT1G74530:CDS;	AT1G74530:CDS;	0.259667	0.303092	hyper	hyper	no	no	UM
Chr3	19052141	19052297	19052141	19052297	AT3G51325:five_prime_UTR,CDS;	AT3G51325:five_prime_UTR,CDS;	0.127526	0.114722	hyper	hyper	no	no	UM
Chr1	25536398	25536416	25536398	25536416	Intergenic	Intergenic	0.473747	0.366476	hyper	hyper	no	no	n/a
Chr4	13201971	13202043	13201798	13202043	AT4G26020:three_prime_UTR;	AT4G26010:three_prime_UTR;AT4G26020:three_prime_UTR;	0.130673	0.149283	hyper	hyper	no	no	UM
Chr2	19023221	19023384	19023221	19023403	AT2G46340:CDS;	AT2G46340:CDS;	0.210617	0.219299	hyper	hyper	yes	yes	CG-gbm
Chr3	7182734	7182877	7182876	7183030	AT3G20560:CDS;	AT3G20560:CDS;	0.212344	0.205192	hyper	hyper	no	no	CG-gbm
Chr1	2218122	2218157	2218122	2218142	AT1G07220:CDS;	AT1G07220:CDS;	0.152383	0.131504	hyper	hyper	no	no	UM
Chr4	1298836	1298923	1298836	1298923	Intergenic	Intergenic	0.244142	0.297995	hyper	hyper	no	no	n/a
Chr4	14774108	14774202	14774108	14774141	AT4G30190:CDS;	AT4G30190:CDS;	0.194723	0.203876	hyper	hyper	no	no	UM
Chr5	13653439	13653833	13653439	13653686	AT5TE48565:transposable_element;	AT5TE48565:transposable_element;	0.206688	0.212787	hyper	hyper	no	no	n/a
Chr1	11449438	11449564	11449406	11449642	AT1G31880:CDS;	AT1G31880:CDS;	0.156975	0.171608	hyper	hyper	no	no	UM
Chr1	19223026	19223197	19223026	19223197	AT1G51805:CDS;	AT1G51805:CDS;	0.212374	0.201976	hyper	hyper	no	no	UM
Chr5	18106529	18106656	18106529	18106656	AT5G44840:CDS;	AT5G44840:CDS;	0.150878	0.157132	hyper	hyper	no	no	CHG-gene
Chr2	6757439	6757516	6757389	6757687	AT2TE27595:transposable_element;	AT2TE27595:transposable_element;AT2TE27600:transposable_element;AT2TE27605:transposable_element;	0.157251	0.223576	hyper	hyper	no	no	n/a
Chr3	8186057	8186095	8186057	8186065	AT3G23040:CDS;	Intergenic	0.124648	0.114119	hyper	hyper	no	no	UM
Chr3	20083231	20083278	20083231	20083278	AT3G54250:CDS;	AT3G54250:CDS;	0.145052	0.163957	hyper	hyper	no	no	UM
Chr1	3785097	3785220	3785097	3785220	AT1G11265:transposable_element_gene;AT1G11270:mRNA;AT1TE12295:transposable_element;	AT1G11265:transposable_element_gene;AT1G11270:mRNA;AT1TE12295:transposable_element;	0.299503	0.298967	hyper	hyper	no	no	n/a
Chr1	30403121	30403185	30403121	30403221	AT1G80910:CDS;	AT1G80910:CDS;	0.143562	0.140993	hyper	hyper	no	no	CG-gbm
Chr4	12516113	12516220	12516113	12516185	AT4G24100:CDS;	AT4G24100:CDS;	0.156477	0.166709	hyper	hyper	no	no	UM
Chr5	17236985	17237117	17237071	17237117	AT5G42965:CDS;	AT5G42965:CDS;	0.174687	0.156044	hyper	hyper	no	no	UM
Chr3	20927081	20927143	20927081	20927127	AT3G56440:CDS;	AT3G56440:CDS;	0.144648	0.120775	hyper	hyper	no	no	CG-gbm
Chr3	10113551	10113650	10113551	10113650	Intergenic	Intergenic	0.120382	0.127478	hyper	hyper	no	no	n/a
Chr5	22829874	22829942	22829839	22829942	Intergenic	Intergenic	0.130917	0.140238	hyper	hyper	no	no	n/a
Chr5	7702477	7702865	7702477	7702985	AT5TE27855:transposable_element;AT5TE27860:transposable_element;AT5TE27865:transposable_element;	AT5TE27855:transposable_element;AT5TE27860:transposable_element;AT5TE27865:transposable_element;	0.161006	0.170245	hyper	hyper	no	no	n/a
Chr1	22474935	22474998	22474935	22474998	AT1G61010:three_prime_UTR,CDS;	AT1G61010:three_prime_UTR,CDS;	0.107761	0.134956	hyper	hyper	no	no	CG-gbm
Chr2	7924020	7924155	7924020	7924155	AT2TE32845:transposable_element;	AT2TE32845:transposable_element;	0.218995	0.222388	hyper	hyper	no	no	n/a
Chr5	18885489	18885552	18885489	18885552	AT5G46550:CDS;	AT5G46550:CDS;	0.139106	0.19293	hyper	hyper	no	no	UM
Chr4	5249148	5249227	5249148	5249227	AT4G08310:CDS;	AT4G08310:CDS;	0.127512	0.127618	hyper	hyper	no	no	CG-gbm
Chr3	16934253	16934436	16934253	16934436	AT3TE68630:transposable_element;AT3TE68635:transposable_element;	AT3TE68630:transposable_element;AT3TE68635:transposable_element;	0.263034	0.253489	hyper	hyper	no	no	n/a
Chr5	24763025	24763121	24762853	24763194	AT5G61580:CDS;	AT5G61580:CDS;	0.175203	0.215069	hyper	hyper	no	no	UM
Chr3	16379045	16379072	16378856	16379324	AT3TE66340:transposable_element;	AT3TE66340:transposable_element;	0.124053	0.237362	hyper	hyper	no	no	n/a
Chr3	11082316	11082361	11082176	11082560	AT3G29110:CDS;	AT3G29110:CDS;	0.123516	0.158304	hyper	hyper	no	no	UM
Chr1	3121232	3121504	3121232	3121504	AT1G09640:CDS;	AT1G09640:CDS;	0.120256	0.11695	hyper	hyper	no	no	UM
Chr1	6317708	6317739	6317551	6317718	AT1G18360:CDS;	AT1G18360:CDS;	0.112648	0.115696	hyper	hyper	no	no	UM
Chr3	8744345	8744459	8744345	8744459	AT3G24190:CDS;	AT3G24190:CDS;	0.184876	0.175587	hyper	hyper	no	no	CG-gbm
Chr5	8852129	8852201	8852129	8852213	AT5G25430:CDS;	AT5G25430:CDS;	0.126896	0.124072	hyper	hyper	no	no	CG-gbm
Chr3	22568457	22568537	22568457	22568537	AT3TE91940:transposable_element;	AT3TE91940:transposable_element;	0.175167	0.221377	hyper	hyper	no	no	n/a
Chr3	21608519	21608543	21608519	21608543	Intergenic	Intergenic	0.261725	0.174006	hyper	hyper	no	no	n/a
Chr4	8893597	8893765	8893597	8893825	AT4G15570:CDS;	AT4G15570:CDS;	0.134739	0.118423	hyper	hyper	no	no	CG-gbm
Chr4	10427038	10427111	10427038	10427127	Intergenic	Intergenic	0.178079	0.378137	hyper	hyper	no	no	n/a
Chr5	14699159	14699347	14699159	14699347	AT5TE52970:transposable_element;	AT5TE52970:transposable_element;	0.221622	0.214866	hyper	hyper	no	no	n/a
Chr2	1326618	1326752	1326472	1326752	Intergenic	Intergenic	0.159338	0.27799	hyper	hyper	no	no	n/a
Chr4	7969322	7969607	7969322	7969607	AT4TE35070:transposable_element;AT4TE35075:transposable_element;	AT4TE35070:transposable_element;AT4TE35075:transposable_element;	0.16019	0.137041	hyper	hyper	no	no	n/a
Chr5	17370916	17371252	17370916	17371500	AT5TE62740:transposable_element;	AT5TE62740:transposable_element;	0.201772	0.209028	hyper	hyper	no	no	n/a
Chr1	18029475	18029497	18029460	18029497	Intergenic	Intergenic	0.203939	0.247206	hyper	hyper	no	no	n/a
Chr3	8565240	8565286	8565240	8565276	Intergenic	Intergenic	0.146311	0.139313	hyper	hyper	no	no	n/a
Chr5	5351994	5352059	5351638	5352059	AT5TE19380:transposable_element;	AT5TE19380:transposable_element;	0.272153	0.598392	hyper	hyper	no	no	n/a
Chr5	8772969	8773012	8772718	8772970	Intergenic	Intergenic	0.237608	0.239566	hyper	hyper	no	no	n/a
Chr3	4133968	4134148	4134025	4134156	AT3G12950:CDS;	AT3G12950:CDS;	0.113747	0.116349	hyper	hyper	no	no	UM
Chr1	9195115	9195124	9194904	9195124	AT1G26610:three_prime_UTR;	AT1G26610:three_prime_UTR,CDS;	0.126882	0.132325	hyper	hyper	no	no	UM
Chr1	11334183	11334490	11334183	11334490	AT1TE36660:transposable_element;	AT1TE36660:transposable_element;	0.145409	0.20932	hyper	hyper	no	no	n/a
Chr3	6668876	6668932	6668876	6669209	Intergenic	AT3G19260:three_prime_UTR;	0.291785	0.350407	hyper	hyper	no	no	UM
Chr5	12604250	12604259	12604250	12604311	AT5G33370:CDS;	AT5G33370:CDS;	0.103995	0.107649	hyper	hyper	no	no	UM
Chr5	15123682	15123702	15123649	15123702	AT5G37970:CDS;	AT5G37970:CDS;	0.115269	0.110964	hyper	hyper	no	no	UM
Chr3	4635158	4635210	4635096	4635216	Intergenic	Intergenic	0.187422	0.176996	hyper	hyper	no	no	n/a
Chr5	3896397	3896461	3896451	3896461	AT5TE14130:transposable_element;	Intergenic	0.142678	0.133311	hyper	hyper	no	no	n/a
Chr2	8489623	8489876	8489623	8489734	AT2TE35500:transposable_element;	AT2TE35500:transposable_element;	0.223939	0.232574	hyper	hyper	no	no	n/a
Chr1	19693594	19693647	19693594	19693647	Intergenic	Intergenic	0.146764	0.147497	hyper	hyper	no	no	n/a
Chr3	18675524	18675716	18675340	18675757	AT3G50360:three_prime_UTR;	AT3G50360:three_prime_UTR,CDS;	0.140571	0.144487	hyper	hyper	no	no	UM
Chr1	20194372	20194596	20194268	20194596	AT1TE66725:transposable_element;AT1TE66730:transposable_element;	AT1TE66725:transposable_element;AT1TE66730:transposable_element;	0.193168	0.425216	hyper	hyper	no	no	n/a
Chr1	20416794	20416960	20416959	20417091	AT1G54700:three_prime_UTR;AT1G54710:three_prime_UTR;	AT1G54700:three_prime_UTR;AT1G54710:three_prime_UTR,CDS;	0.117154	0.137255	hyper	hyper	no	no	UM
Chr4	9049036	9049043	9049036	9049043	AT4TE40595:transposable_element;	AT4TE40595:transposable_element;	0.301015	0.239321	hyper	hyper	no	no	n/a
Chr2	4304340	4304405	4304256	4304633	AT2TE18075:transposable_element;	AT2TE18070:transposable_element;AT2TE18075:transposable_element;	0.159525	0.269342	hyper	hyper	no	no	n/a
Chr5	3659950	3660182	3660181	3660264	Intergenic	Intergenic	0.196462	0.231149	hyper	hyper	no	no	n/a
Chr1	3476762	3476800	3476602	3476905	AT1G10540:CDS;	AT1G10540:CDS;	0.13131	0.177155	hyper	hyper	no	no	UM
Chr5	5513020	5513047	5513020	5513047	Intergenic	Intergenic	0.180246	0.231088	hyper	hyper	no	no	n/a
Chr5	7473053	7473112	7473036	7473112	AT5G22500:CDS;	AT5G22500:CDS;	0.142555	0.161714	hyper	hyper	no	no	UM
Chr4	9005233	9005446	9005185	9005502	AT4TE40350:transposable_element;AT4TE40355:transposable_element;	AT4TE40350:transposable_element;AT4TE40355:transposable_element;	0.258445	0.272418	hyper	hyper	no	yes	n/a
Chr5	5761504	5761598	5761504	5761598	AT5TE20840:transposable_element;	AT5TE20840:transposable_element;	0.159025	0.232804	hyper	hyper	no	no	n/a
Chr2	7369979	7370099	7369874	7370351	AT2G16970:CDS;AT2TE30140:transposable_element;AT2TE30145:transposable_element;	AT2G16970:CDS;AT2TE30140:transposable_element;AT2TE30145:transposable_element;AT2TE30150:transposable_element;	0.183933	0.296466	hyper	hyper	no	no	UM
Chr5	22858638	22858647	22858489	22858647	AT5G56450:three_prime_UTR;	AT5G56450:three_prime_UTR;	0.132586	0.137696	hyper	hyper	no	no	UM
Chr1	23255900	23255913	23255900	23255913	AT1G62800:CDS;	AT1G62800:CDS;	0.148084	0.111903	hyper	hyper	no	no	UM
Chr5	20090127	20090159	20090127	20090200	Intergenic	Intergenic	0.176186	0.155351	hyper	hyper	no	no	n/a
Chr5	25065250	25065365	25065092	25065365	AT5G62420:CDS;	AT5G62420:CDS;	0.13881	0.206931	hyper	hyper	no	no	UM
Chr1	12230890	12230964	12230832	12230964	AT1TE39720:transposable_element;	AT1TE39720:transposable_element;	0.174568	0.173443	hyper	hyper	no	no	n/a
Chr5	26276637	26276641	26276637	26276641	AT5TE94620:transposable_element;	AT5TE94620:transposable_element;	0.167001	0.214404	hyper	hyper	no	no	n/a
Chr5	8291032	8291166	8291032	8291166	Intergenic	Intergenic	0.242561	0.224128	hyper	hyper	no	no	n/a
Chr5	15735069	15735180	15735069	15735180	AT5TE56820:transposable_element;	AT5TE56820:transposable_element;	0.202733	0.177423	hyper	hyper	no	no	n/a
Chr2	14364160	14364177	14364160	14364279	AT2TE63585:transposable_element;	AT2TE63585:transposable_element;	0.235585	0.254577	hyper	hyper	no	no	n/a
Chr2	17068632	17068673	17068632	17068673	Intergenic	Intergenic	0.176502	0.170262	hyper	hyper	no	no	n/a
Chr1	457344	457427	457316	457522	AT1G02305:CDS;	AT1G02305:CDS;	0.121948	0.126074	hyper	hyper	no	no	UM
Chr1	7441281	7441383	7441281	7441383	AT1G21250:CDS;	AT1G21250:CDS;	0.139773	0.130725	hyper	hyper	no	no	UM
Chr1	10342422	10342525	10342142	10342525	AT1G29590:CDS;	AT1G29590:CDS;	0.11274	0.196607	hyper	hyper	no	no	UM
Chr2	7627186	7627210	7627186	7627210	AT2G17530:CDS;	AT2G17530:CDS;	0.151911	0.144251	hyper	hyper	no	no	UM
Chr1	28936180	28936205	28936180	28936205	AT1TE94640:transposable_element;	AT1TE94640:transposable_element;	0.1437	0.14934	hyper	hyper	no	no	n/a
Chr1	27677513	27677607	27677447	27677607	AT1TE90575:transposable_element;	AT1TE90575:transposable_element;	0.180549	0.196081	hyper	hyper	no	no	n/a
Chr4	17624563	17624628	17624474	17624649	Intergenic	Intergenic	0.179299	0.231974	hyper	hyper	no	no	n/a
Chr5	15865330	15865421	15865330	15865421	AT5G39620:CDS;	AT5G39620:CDS;	0.15144	0.150014	hyper	hyper	no	no	CHH-gene
Chr3	6978261	6978418	6978261	6978418	AT3TE29300:transposable_element;	AT3TE29300:transposable_element;	0.181705	0.169518	hyper	hyper	no	no	n/a
Chr4	16104142	16104148	16104142	16104359	AT4G33470:CDS;	AT4G33470:CDS;	0.142029	0.165074	hyper	hyper	no	yes	UM
Chr5	8281694	8281706	8281340	8281706	AT5TE29935:transposable_element;	AT5TE29935:transposable_element;	0.237493	0.339221	hyper	hyper	no	no	n/a
Chr2	16942322	16942365	16942281	16942365	AT2G40570:CDS;	AT2G40570:CDS;	0.168598	0.29831	hyper	hyper	no	no	UM
Chr3	22848860	22848885	22848860	22848885	AT3G61730:CDS;	AT3G61730:CDS;	0.107409	0.11756	hyper	hyper	no	no	UM
Chr1	19487200	19487279	19487165	19487279	AT1G52320:three_prime_UTR,CDS;	AT1G52320:three_prime_UTR,CDS;	0.124708	0.13685	hyper	hyper	no	no	CG-gbm
Chr4	7770379	7770417	7770379	7770417	AT4G13350:CDS;	AT4G13350:CDS;	0.130893	0.146421	hyper	hyper	no	no	CG-gbm
Chr3	5160500	5160553	5160425	5160501	AT3G15340:CDS;	AT3G15340:CDS;	0.222052	0.253942	hyper	hyper	no	no	UM
Chr3	5741962	5742045	5741962	5742128	AT3G16840:CDS;	AT3G16840:CDS;	0.133329	0.200481	hyper	hyper	no	no	CG-gbm
Chr5	20909037	20909053	20909032	20909513	AT5G51470:CDS;	AT5G51470:CDS;	0.136124	0.258809	hyper	hyper	no	no	UM
Chr4	8808944	8808962	8808930	8809135	AT4G15396:CDS;	AT4G15396:CDS;	0.118814	0.149494	hyper	hyper	no	no	UM
Chr3	22076741	22076758	22076741	22076758	AT3G59765:ncRNA;AT3TE89880:transposable_element;	AT3G59765:ncRNA;AT3TE89880:transposable_element;	0.124147	0.203198	hyper	hyper	no	no	n/a
Chr3	3535794	3535884	3535794	3535884	AT3G11290:CDS;	AT3G11290:CDS;	0.15111	0.163814	hyper	hyper	no	no	CG-gbm
Chr4	16447598	16447867	16447537	16447867	AT4G34400:three_prime_UTR;	AT4G34400:three_prime_UTR,CDS;	0.137406	0.221795	hyper	hyper	no	no	UM
Chr5	16047507	16047669	16047606	16047669	Intergenic	Intergenic	0.147876	0.149632	hyper	hyper	no	no	n/a
Chr2	10470652	10470696	10470652	10470896	AT2TE44930:transposable_element;	AT2TE44930:transposable_element;AT2TE44935:transposable_element;	0.146517	0.175464	hyper	hyper	no	no	n/a
Chr1	8524682	8524695	8524664	8524695	AT1G24095:three_prime_UTR,CDS;	AT1G24095:three_prime_UTR,CDS;	0.192182	0.250826	hyper	hyper	no	no	UM
Chr5	8344693	8344728	8344486	8344806	Intergenic	Intergenic	0.180639	0.365751	hyper	hyper	no	no	n/a
Chr5	7892648	7892758	7892626	7892758	Intergenic	Intergenic	0.119588	0.120822	hyper	hyper	no	no	n/a
Chr1	25910589	25910598	25910529	25910598	AT1G68910:mRNA;	AT1G68910:five_prime_UTR;	0.119923	0.227781	hyper	hyper	no	no	CG-gbm
Chr1	20397955	20398223	20398222	20398385	AT1TE67365:transposable_element;	AT1TE67365:transposable_element;	0.133428	0.162411	hyper	hyper	no	no	n/a
Chr5	19479413	19479416	19479413	19479416	AT5TE70100:transposable_element;	AT5TE70100:transposable_element;	0.179945	0.273282	hyper	hyper	no	no	n/a
Chr5	2286963	2287067	2286963	2287230	AT5G07280:CDS;	AT5G07280:CDS;	0.102692	0.122536	hyper	hyper	no	no	UM
Chr4	2650855	2651018	2650855	2651500	AT4G05140:CDS;	AT4G05140:CDS;	0.103009	0.193759	hyper	hyper	no	no	UM
Chr5	25834650	25834703	25834557	25834794	AT5G64630:CDS;	AT5G64630:CDS;	0.15572	0.206887	hyper	hyper	no	no	UM
Chr1	6144328	6144337	6144102	6144359	AT1G17840:CDS;	AT1G17840:CDS;	0.113824	0.201184	hyper	hyper	no	no	UM
Chr1	17274105	17274137	17273952	17274137	Intergenic	Intergenic	0.10915	0.18801	hyper	hyper	no	no	n/a
Chr1	26677678	26677693	26677670	26677693	AT1TE87330:transposable_element;	AT1TE87330:transposable_element;	0.129587	0.150595	hyper	hyper	no	no	n/a
Chr3	10505483	10505542	10505456	10505676	AT3TE43645:transposable_element;	AT3TE43645:transposable_element;	0.103067	0.100414	hyper	hyper	no	no	n/a
Chr5	25102118	25102141	25102118	25102345	AT5G62530:CDS;	AT5G62530:CDS;	0.127206	0.160775	hyper	hyper	no	no	CG-gbm
Chr4	602233	602248	602205	602254	Intergenic	Intergenic	0.174988	0.172946	hyper	hyper	no	no	n/a
Chr5	9195101	9195104	9194953	9195170	AT5TE33250:transposable_element;	AT5TE33250:transposable_element;	0.229916	0.297927	hyper	hyper	no	no	n/a
Chr4	14124084	14124105	14123940	14124105	AT4G28580:CDS;	AT4G28580:CDS;	0.113178	0.209864	hyper	hyper	no	no	UM
Chr1	12012836	12012894	12012836	12013212	AT1TE38915:transposable_element;	AT1TE38915:transposable_element;AT1TE38920:transposable_element;	0.125205	0.152893	hyper	hyper	no	no	n/a
Chr4	13007588	13007638	13007588	13007698	AT4G25440:CDS;	AT4G25440:CDS;	0.177029	0.201262	hyper	hyper	no	no	UM
Chr4	144702	144729	144702	144788	AT4TE00745:transposable_element;	AT4TE00745:transposable_element;	0.113575	0.147582	hyper	hyper	no	no	n/a
Chr1	22829374	22829408	22829374	22829408	AT1TE75250:transposable_element;	AT1TE75250:transposable_element;	0.14349	0.155707	hyper	hyper	no	no	n/a
Chr3	8714695	8714743	8714661	8714743	Intergenic	Intergenic	0.14921	0.154087	hyper	hyper	no	no	n/a
Chr3	10678485	10678496	10678421	10678554	Intergenic	Intergenic	0.179629	0.314086	hyper	hyper	no	no	n/a
Chr4	8302520	8302533	8302451	8302533	AT4G14420:CDS;	AT4G14420:CDS;	0.169054	0.200667	hyper	hyper	no	no	UM
Chr1	5437589	5437845	5437525	5437845	AT1TE17555:transposable_element;	AT1TE17555:transposable_element;	0.128225	0.157418	hyper	hyper	no	no	n/a
Chr3	21447338	21447398	21447288	21447621	AT3G57930:CDS;	AT3G57930:CDS;	0.148111	0.238706	hyper	hyper	no	no	UM
Chr2	4348357	4348384	4348357	4348384	Intergenic	Intergenic	0.122728	0.125341	hyper	hyper	no	no	n/a
Chr5	20979165	20979285	20979165	20979355	AT5G51650:CDS;	AT5G51650:CDS;	0.189634	0.229344	hyper	hyper	no	no	CHH-gene
Chr2	15804447	15804454	15804338	15804791	AT2G37680:CDS;	AT2G37680:CDS;	0.118601	0.165091	hyper	hyper	no	no	UM
Chr4	2615499	2615665	2615499	2615665	AT4TE12235:transposable_element;	AT4TE12235:transposable_element;	0.243528	0.1965	hyper	hyper	no	no	n/a
Chr4	6976964	6977035	6976915	6977035	Intergenic	Intergenic	0.144281	0.138314	hyper	hyper	no	no	n/a
Chr4	7518032	7518079	7518032	7518079	AT4G12790:CDS;	AT4G12790:CDS;	0.27049	0.235556	hyper	hyper	no	no	UM
ChrM	56913	56933	56749	56933	no match	no match	0.175174	0.267413	hyper	hyper	no	no	n/a
Chr1	28421619	28421626	28421597	28421626	AT1TE92970:transposable_element;	AT1TE92970:transposable_element;	0.176595	0.177468	hyper	hyper	no	no	n/a
Chr2	11379426	11379476	11379385	11379476	AT2TE49230:transposable_element;	AT2TE49230:transposable_element;	0.149422	0.155181	hyper	hyper	no	no	n/a
Chr3	20490209	20490211	20490209	20490212	AT3G55260:CDS;	AT3G55260:CDS;	0.162059	0.152384	hyper	hyper	no	no	UM
Chr5	10021604	10021642	10021521	10021642	Intergenic	Intergenic	0.133291	0.198011	hyper	hyper	no	no	n/a
Chr3	8613726	8613795	8613595	8613933	AT3TE36105:transposable_element;	AT3TE36105:transposable_element;	0.122354	0.137455	hyper	hyper	no	no	n/a
Chr1	22409300	22409356	22409300	22409356	Intergenic	Intergenic	0.158552	0.148839	hyper	hyper	no	no	n/a
Chr2	19433318	19433555	19433318	19433365	AT2TE88570:transposable_element;	AT2TE88570:transposable_element;	0.197075	-0.172657	hyper	hypo	no	no	n/a
Chr1	14000833	14001112	14000703	14000842	AT1TE45975:transposable_element;	Intergenic	0.202123	-0.259244	hyper	hypo	no	no	n/a
Chr1	11088726	11088924	11088833	11088924	AT1TE35810:transposable_element;AT1TE35815:transposable_element;AT1TE35820:transposable_element;	AT1TE35815:transposable_element;AT1TE35820:transposable_element;	0.142764	-0.130375	hyper	hypo	no	no	n/a
Chr2	1160312	1160697	1160468	1161133	AT2TE05245:transposable_element;	AT2G03810:five_prime_UTR;AT2TE05245:transposable_element;	0.264173	-0.178998	hyper	hypo	no	no	UM
Chr3	19655683	19655918	19655585	19655684	AT3G53000:three_prime_UTR,CDS;	AT3G53000:CDS;	0.253422	-0.195925	hyper	hypo	no	no	UM
Chr1	18732891	18733008	18732991	18733008	AT1G50590:CDS;	AT1G50590:CDS;	0.144962	-0.141809	hyper	hypo	no	no	UM
Chr5	2895626	2895878	2895774	2895878	AT5TE10525:transposable_element;	AT5TE10525:transposable_element;	0.145079	-0.171324	hyper	hypo	no	no	n/a
Chr3	18511858	18511986	18511973	18511986	AT3TE75090:transposable_element;	Intergenic	0.200338	-0.176506	hyper	hypo	no	no	n/a
Chr2	13265009	13265169	13265009	13265014	AT2G31130:CDS;	AT2G31130:CDS;	0.171616	-0.193574	hyper	hypo	no	no	UM
Chr1	28592734	28592912	28592734	28592912	Intergenic	Intergenic	0.14444	-0.226488	hyper	hypo	no	no	n/a
Chr1	22299937	22300039	22299911	22299938	AT1G60525:ncRNA;AT1G60530:CDS;	AT1G60525:ncRNA;AT1G60530:CDS;	0.203456	-0.189617	hyper	hypo	no	no	n/a
Chr3	19044190	19044376	19044124	19044191	AT3G51290:three_prime_UTR,CDS;AT3G51300:three_prime_UTR,CDS;	AT3G51290:CDS;AT3G51300:CDS;	0.146247	-0.128503	hyper	hypo	no	no	UM
Chr5	19794992	19795232	19795219	19795232	AT5TE71235:transposable_element;	AT5TE71235:transposable_element;	0.254194	-0.175738	hyper	hypo	no	no	n/a
Chr5	22680442	22680643	22680442	22680643	AT5TE81600:transposable_element;	AT5TE81600:transposable_element;	0.234948	-0.233715	hyper	hypo	no	no	n/a
Chr5	21324730	21325026	21324561	21324733	AT5G52545:five_prime_UTR;	AT5G52545:five_prime_UTR;	0.149978	-0.157069	hyper	hypo	no	no	UM
Chr2	7950637	7950671	7950670	7951231	AT2TE32970:transposable_element;	AT2TE32970:transposable_element;AT2TE32975:transposable_element;	0.119232	-0.34327	hyper	hypo	no	no	n/a
Chr5	17945545	17945636	17945431	17945636	Intergenic	Intergenic	0.133782	-0.20254	hyper	hypo	no	no	n/a
Chr1	26035292	26035373	26035156	26035293	AT1G69250:three_prime_UTR,CDS;AT1TE85290:transposable_element;	AT1G69250:three_prime_UTR,CDS;AT1TE85290:transposable_element;	0.118042	-0.127835	hyper	hypo	no	no	UM
Chr4	16118025	16118058	16118025	16118099	AT4G33510:CDS;	AT4G33510:CDS;	0.21841	-0.240862	hyper	hypo	no	no	UM
Chr5	3180271	3180295	3180271	3180530	Intergenic	Intergenic	0.236446	-0.241852	hyper	hypo	no	no	n/a
Chr4	743151	743274	743151	743274	AT4TE03815:transposable_element;	AT4TE03815:transposable_element;	0.119822	-0.299742	hyper	hypo	no	no	n/a
Chr4	6825874	6825943	6825942	6826108	AT4TE29365:transposable_element;AT4TE29370:transposable_element;	AT4TE29370:transposable_element;AT4TE29375:transposable_element;	0.168306	-0.159082	hyper	hypo	no	no	n/a
Chr3	18799523	18800026			Intergenic		0.193881		hyper		no		n/a
Chr3	19918314	19918631			AT3G53760:CDS;		0.202951		hyper		no		UM
Chr5	23334704	23335021			AT5G57620:five_prime_UTR,CDS;		0.182865		hyper		no		UM
Chr1	7959622	7960003			AT1TE25610:transposable_element;		0.16095		hyper		no		n/a
Chr3	21436268	21436441			Intergenic		0.154977		hyper		no		n/a
Chr5	8943808	8943931			Intergenic		0.329062		hyper		no		n/a
Chr3	8160229	8160389			AT3G22980:three_prime_UTR,CDS;AT3TE34225:transposable_element;		0.218908		hyper		yes		CG-gbm
Chr4	13834047	13834370			AT4G27730:CDS;		0.210018		hyper		no		UM
Chr1	9756822	9757116			AT1G28000:CDS;		0.200402		hyper		yes		UM
Chr1	20601142	20601334			AT1G55220:CDS;AT1G55221:pseudogene;		0.184983		hyper		no		UM
Chr1	21514882	21515286			AT1TE71005:transposable_element;		0.110508		hyper		no		n/a
Chr1	21228479	21228563			Intergenic		0.39873		hyper		no		n/a
Chr3	7389355	7389800			AT3G21080:CDS;		0.162497		hyper		no		UM
Chr5	17239502	17239783			AT5G42970:CDS;		0.19859		hyper		no		UM
Chr3	4793060	4793219			AT3G14360:CDS;		0.109111		hyper		no		UM
Chr1	54225	54324			AT1G01110:CDS;		0.17277		hyper		no		UM
Chr4	15867681	15867837			AT4G32880:five_prime_UTR,CDS;		0.158301		hyper		no		UM
Chr3	2661297	2661683			AT3TE11220:transposable_element;AT3TE11225:transposable_element;AT3TE11230:transposable_element;		0.381317		hyper		no		n/a
Chr1	28447090	28447229			AT1G75760:CDS;		0.336621		hyper		no		UM
Chr1	22867258	22867359			Intergenic		0.129047		hyper		no		n/a
Chr5	25440556	25440649			AT5TE91520:transposable_element;		0.211348		hyper		no		n/a
Chr3	1824880	1825050			AT3G06040:CDS;		0.370162		hyper		no		UM
Chr5	17982110	17982270			Intergenic		0.209418		hyper		no		n/a
Chr2	17083780	17084020			AT2G40935:CDS;		0.226		hyper		no		UM
Chr2	7529967	7530865			AT2TE30965:transposable_element;		0.309174		hyper		no		n/a
Chr2	13474267	13474435			AT2G31680:CDS;		0.110623		hyper		no		UM
Chr3	19544612	19545177			AT3TE79360:transposable_element;AT3TE79365:transposable_element;		0.191986		hyper		no		n/a
Chr3	19924849	19925050			AT3G53780:CDS;		0.372266		hyper		no		UM
Chr3	1519752	1519947			AT3G05330:CDS;		0.252909		hyper		no		UM
Chr1	11979848	11980284			AT1TE38775:transposable_element;		0.304235		hyper		no		n/a
Chr1	21233337	21233600			AT1G56650:three_prime_UTR;AT1TE70160:transposable_element;		0.302634		hyper		no		UM
Chr3	9326104	9326307			AT3TE38955:transposable_element;		0.193211		hyper		no		n/a
Chr1	18234251	18234432			AT1TE60405:transposable_element;		0.145712		hyper		no		n/a
Chr2	17200978	17201151			AT2G41250:CDS;		0.125646		hyper		no		UM
Chr4	6496135	6496358			AT4G10510:CDS;		0.144646		hyper		no		UM
Chr5	17384217	17384466			AT5G43310:CDS;		0.165856		hyper		no		CG-gbm
Chr1	1359242	1359399			AT1G04830:CDS;		0.135738		hyper		no		UM
Chr4	570735	570863			AT4G01390:CDS;		0.225733		hyper		no		UM
Chr2	6745849	6746085			AT2TE27560:transposable_element;		0.149361		hyper		no		n/a
Chr1	674602	674945			AT1G02970:CDS;		0.158615		hyper		no		UM
Chr3	9205542	9205835			AT3TE38460:transposable_element;		0.253657		hyper		no		n/a
ChrM	242946	243353			no match		0.670776		hyper		no		n/a
Chr1	10063232	10063560			AT1G28630:five_prime_UTR,CDS;AT1TE32460:transposable_element;		0.151502		hyper		no		UM
Chr3	18859725	18859910			Intergenic		0.210337		hyper		no		n/a
Chr1	16236670	16236752			Intergenic		0.195859		hyper		no		n/a
Chr4	6259935	6260201			AT4G09990:five_prime_UTR,CDS;		0.168079		hyper		no		UM
Chr1	7848432	7848621			Intergenic		0.248347		hyper		no		n/a
Chr2	394552	394720			AT2TE01630:transposable_element;		0.163031		hyper		no		n/a
Chr1	24299344	24299437			Intergenic		0.148338		hyper		no		n/a
Chr3	15180354	15180591			AT3G43190:CDS;		0.227742		hyper		no		UM
Chr1	26359863	26359988			AT1TE86330:transposable_element;		0.199273		hyper		no		n/a
Chr3	17601734	17602068			AT3G47740:CDS;		0.172025		hyper		no		UM
Chr3	5457479	5457569			AT3G16090:CDS;		0.123673		hyper		no		UM
Chr1	1846867	1847114			Intergenic		0.223752		hyper		no		n/a
Chr1	26534438	26534611			AT1G70410:CDS;		0.203306		hyper		no		UM
Chr1	25692956	25693345			AT1TE84230:transposable_element;		0.259022		hyper		no		n/a
Chr3	16629335	16629504			AT3G45310:CDS;		0.162022		hyper		no		UM
Chr3	19304119	19304304			AT3G52030:three_prime_UTR,CDS;AT3G52040:three_prime_UTR;		0.152524		hyper		no		UM
Chr3	22749182	22749381			AT3TE92735:transposable_element;		0.17951		hyper		no		n/a
Chr1	17882347	17882691			AT1G48400:CDS;		0.154926		hyper		no		UM
Chr4	14163874	14164193			AT4TE67005:transposable_element;		0.311295		hyper		no		n/a
Chr2	18662471	18662713			AT2G45250:three_prime_UTR,CDS;		0.222449		hyper		no		UM
Chr3	10059877	10060177			Intergenic		0.141788		hyper		no		n/a
Chr5	2148959	2149150			AT5G06940:CDS;		0.105537		hyper		no		UM
Chr1	21091059	21091341			AT1G56340:CDS;		0.150464		hyper		no		UM
Chr3	7346587	7346790			AT3G20960:CDS;		0.109225		hyper		no		UM
Chr5	19025960	19026212			AT5G46877:CDS;		0.299781		hyper		no		UM
Chr1	24622477	24622626			AT1TE80880:transposable_element;		0.313506		hyper		no		n/a
Chr5	22146820	22146934			AT5G54520:CDS;		0.149781		hyper		no		UM
Chr5	20559807	20560098			AT5TE74060:transposable_element;AT5TE74065:transposable_element;		0.290764		hyper		no		n/a
Chr3	11387552	11387774			Intergenic		0.203864		hyper		no		n/a
Chr1	21209717	21210010			AT1TE70100:transposable_element;		0.173267		hyper		no		n/a
Chr4	8384760	8384876			AT4G14615:three_prime_UTR,CDS;		0.146544		hyper		no		UM
Chr1	2685636	2685815			AT1G08490:three_prime_UTR;		0.167566		hyper		no		UM
Chr3	4566077	4566254			AT3G13870:CDS;		0.10431		hyper		no		CG-gbm
Chr3	8409515	8409747			AT3TE35250:transposable_element;		0.27989		hyper		no		n/a
Chr5	90842	91295			Intergenic		0.206748		hyper		no		n/a
Chr5	19675514	19675614			Intergenic		0.229682		hyper		no		n/a
Chr4	1198477	1198647			AT4TE06130:transposable_element;		0.153135		hyper		no		n/a
Chr5	19724748	19724860			AT5G48640:CDS;		0.301616		hyper		no		UM
Chr3	16849409	16849567			AT3G45840:CDS;		0.128029		hyper		no		CHH-gene
ChrM	143779	144031			no match		0.212973		hyper		no		n/a
Chr5	8783890	8784172			Intergenic		0.234922		hyper		no		n/a
Chr3	22047765	22048055			AT3TE89780:transposable_element;		0.130959		hyper		no		n/a
Chr5	7145067	7145249			AT5G21040:CDS;		0.113426		hyper		no		CG-gbm
Chr3	15939327	15939499			AT3TE64485:transposable_element;		0.275694		hyper		no		n/a
Chr1	9068721	9069048			AT1G26208:ncRNA;		0.136897		hyper		no		n/a
Chr1	2968682	2968865			AT1G09195:three_prime_UTR,CDS;		0.199012		hyper		no		UM
Chr4	14596200	14596405			AT4G29820:CDS;		0.298596		hyper		no		UM
Chr1	29136626	29136695			AT1G77530:CDS;		0.119493		hyper		no		UM
Chr4	9746320	9746471			AT4G17480:CDS;		0.150181		hyper		no		UM
Chr3	9029846	9029913			AT3G24715:CDS;		0.122189		hyper		no		UM
Chr2	11644064	11644290			Intergenic		0.131541		hyper		no		n/a
Chr5	18325046	18325162			AT5G45250:CDS;		0.102972		hyper		no		UM
Chr5	7429302	7429367			Intergenic		0.145295		hyper		no		n/a
Chr3	5481699	5481792			AT3G16180:CDS;		0.127171		hyper		no		UM
Chr4	7210059	7210210			AT4TE31390:transposable_element;		0.158439		hyper		no		n/a
Chr5	17936784	17936848			AT5TE64730:transposable_element;		0.374214		hyper		no		n/a
Chr3	15871420	15871730			Intergenic		0.424767		hyper		no		n/a
Chr1	1775680	1775761			AT1G05880:CDS;		0.13456		hyper		no		UM
Chr5	5992424	5992528			AT5G18120:CDS;		0.199184		hyper		no		UM
Chr2	12454498	12454693			Intergenic		0.130167		hyper		no		n/a
Chr5	24835710	24835755			AT5G61820:CDS;		0.145976		hyper		no		UM
Chr4	14900442	14900636			AT4G30490:CDS;		0.255454		hyper		no		UM
Chr1	17540180	17540570			Intergenic		0.259521		hyper		no		n/a
Chr1	22323187	22323799			Intergenic		0.246701		hyper		no		n/a
Chr4	8021990	8022244			AT4G13850:three_prime_UTR,CDS;AT4TE35370:transposable_element;		0.163965		hyper		no		UM
Chr3	9149865	9150049			AT3G25120:CDS;		0.134343		hyper		no		UM
Chr3	3018246	3018342			AT3G09830:CDS;		0.151302		hyper		no		UM
Chr2	18804011	18804096			Intergenic		0.347224		hyper		no		n/a
Chr3	17078373	17078574			Intergenic		0.142051		hyper		no		n/a
Chr1	3944630	3944717			Intergenic		0.123583		hyper		no		n/a
Chr5	8312075	8312143			AT5TE30040:transposable_element;AT5TE30045:transposable_element;		0.253166		hyper		no		n/a
Chr5	10875277	10875452			AT5TE39495:transposable_element;		0.140029		hyper		no		n/a
Chr3	20931438	20931518			AT3G56450:CDS;		0.248287		hyper		no		UM
Chr5	1521228	1521341			AT5G05140:CDS;		0.175474		hyper		no		UM
Chr3	9625684	9625818			Intergenic		0.163098		hyper		no		n/a
Chr3	9042840	9042984			Intergenic		0.167889		hyper		no		n/a
Chr3	7286998	7287113			Intergenic		0.107508		hyper		no		n/a
Chr3	1075793	1075882			AT3G04100:CDS;		0.105173		hyper		no		CG-gbm
Chr4	601918	601973			AT4TE03145:transposable_element;		0.221834		hyper		no		n/a
Chr3	657229	657404			AT3G02930:CDS;		0.221675		hyper		no		UM
Chr2	921091	921333			Intergenic		0.316238		hyper		no		n/a
Chr1	17695702	17695854			Intergenic		0.304786		hyper		no		n/a
Chr1	10531456	10531682			AT1TE34035:transposable_element;		0.202599		hyper		no		n/a
Chr2	16611084	16611163			AT2G39805:CDS;		0.177507		hyper		no		UM
Chr3	7838450	7838618			AT3G22200:CDS;		0.122797		hyper		no		UM
Chr5	22685644	22685920			AT5G56020:CDS;		0.156267		hyper		no		UM
Chr4	421376	421601			AT4G00970:CDS;		0.160057		hyper		no		UM
Chr3	20942693	20942861			AT3G56490:CDS;		0.167924		hyper		no		UM
Chr1	23149787	23149934			AT1TE76310:transposable_element;		0.239928		hyper		no		n/a
Chr3	12559225	12559274			AT3TE51705:transposable_element;AT3TE51710:transposable_element;		0.124659		hyper		no		n/a
Chr2	18093401	18093569			Intergenic		0.312721		hyper		no		n/a
Chr3	15603934	15604011			AT3TE63075:transposable_element;		0.163807		hyper		no		n/a
Chr5	17303104	17303593			AT5TE62535:transposable_element;AT5TE62540:transposable_element;		0.133544		hyper		no		n/a
Chr2	12136266	12136608			Intergenic		0.177493		hyper		no		n/a
Chr4	192391	192474			Intergenic		0.257828		hyper		no		n/a
Chr5	20328642	20328965			Intergenic		0.191962		hyper		no		n/a
Chr2	11169089	11169317			AT2TE48225:transposable_element;AT2TE48230:transposable_element;		0.152618		hyper		no		n/a
Chr3	16462776	16463085			Intergenic		0.102096		hyper		no		n/a
Chr1	5216313	5216381			AT1G15160:CDS;		0.166796		hyper		no		UM
Chr4	7506334	7506375			Intergenic		0.206959		hyper		no		n/a
Chr3	7437629	7437924			AT3G21200:three_prime_UTR,CDS;		0.162874		hyper		no		UM
Chr4	5322216	5322683			Intergenic		0.356873		hyper		yes		n/a
Chr5	1757399	1757524			AT5G05840:CDS;		0.139777		hyper		no		UM
Chr3	8518186	8518347			Intergenic		0.128629		hyper		no		n/a
Chr5	8586500	8586881			AT5TE31060:transposable_element;		0.124392		hyper		no		n/a
Chr3	7142142	7142467			AT3TE29995:transposable_element;AT3TE30000:transposable_element;		0.180495		hyper		no		n/a
Chr5	7550017	7550225			AT5G22720:CDS;		0.182451		hyper		no		UM
Chr3	5140209	5140281			AT3G15260:three_prime_UTR,CDS;		0.107684		hyper		no		UM
Chr1	5355393	5355566			Intergenic		0.164749		hyper		no		n/a
Chr5	9577743	9577935			Intergenic		0.119733		hyper		no		n/a
Chr3	4383470	4383515			AT3G13450:CDS;		0.157602		hyper		no		UM
Chr1	6203995	6204196			Intergenic		0.180582		hyper		no		n/a
Chr1	4390733	4390851			AT1G12880:CDS;		0.123411		hyper		no		UM
Chr1	17860689	17861063			AT1TE59280:transposable_element;		0.262194		hyper		no		n/a
Chr2	14065394	14065571			Intergenic		0.169944		hyper		no		n/a
Chr3	20573775	20573889			Intergenic		0.129015		hyper		no		n/a
Chr5	1889554	1889757			AT5G06240:three_prime_UTR;		0.140067		hyper		no		UM
Chr4	10289765	10289807			AT4G18700:CDS;		0.163134		hyper		no		UM
Chr3	795550	795659			AT3G03360:CDS;		0.112034		hyper		yes		CG-gbm
Chr4	13051919	13052000			Intergenic		0.215717		hyper		no		n/a
Chr1	22159143	22159247			Intergenic		0.211781		hyper		no		n/a
Chr3	5057371	5057471			AT3G15020:CDS;		0.114539		hyper		no		UM
Chr1	22182454	22182562			AT1G60150:transposable_element_gene;AT1TE73255:transposable_element;		0.125625		hyper		no		n/a
Chr5	14760841	14761223			AT5TE53210:transposable_element;AT5TE53215:transposable_element;		0.119912		hyper		no		n/a
Chr5	1486744	1486847			AT5TE05390:transposable_element;AT5TE05395:transposable_element;		0.212122		hyper		no		n/a
Chr1	8178360	8178479			AT1TE26320:transposable_element;		0.284853		hyper		no		n/a
Chr2	410942	411205			AT2G01905:CDS;		0.184256		hyper		no		UM
Chr1	16272465	16272526			AT1G43180:pseudogene;		0.164985		hyper		no		n/a
Chr3	17171475	17171730			Intergenic		0.23334		hyper		no		n/a
Chr5	16636991	16637271			AT5G41600:CDS;		0.122721		hyper		no		UM
Chr1	29545154	29545203			AT1G78550:CDS;		0.125164		hyper		no		UM
Chr1	22981152	22981201			AT1G62190:CDS;		0.146204		hyper		no		UM
Chr3	2655036	2655132			AT3G08740:CDS;		0.120517		hyper		no		UM
Chr5	8404837	8405047			AT5TE30395:transposable_element;AT5TE30400:transposable_element;		0.204496		hyper		no		n/a
Chr4	7126737	7126888			AT4G11845:three_prime_UTR;		0.228188		hyper		no		UM
Chr5	25510411	25510553			AT5TE91760:transposable_element;		0.19402		hyper		no		n/a
Chr1	11772454	11772609			AT1G32550:CDS;		0.145344		hyper		no		UM
Chr3	21970740	21970825			AT3G59440:CDS;		0.140556		hyper		no		UM
Chr5	16296107	16296218			AT5G40710:CDS;		0.180431		hyper		no		UM
Chr1	25182832	25183204			AT1G67270:CDS;		0.12211		hyper		no		UM
Chr5	8954853	8955103			AT5G25754:CDS;		0.161937		hyper		no		UM
Chr2	12310301	12310373			Intergenic		0.305279		hyper		no		n/a
Chr4	12575699	12575717			AT4G24250:CDS;		0.140126		hyper		no		UM
Chr5	18440298	18440678			AT5TE66360:transposable_element;		0.161802		hyper		no		n/a
Chr3	21405506	21405610			AT3G57790:CDS;		0.106295		hyper		no		UM
Chr4	604462	604513			AT4TE03160:transposable_element;		0.178736		hyper		no		n/a
Chr1	4376609	4376740			AT1G12840:CDS;		0.157908		hyper		no		UM
Chr2	17549591	17549727			AT2G42070:three_prime_UTR,CDS;		0.173261		hyper		no		UM
Chr3	8010002	8010192			AT3G22630:CDS;		0.139882		hyper		no		UM
Chr3	19799629	19799768			AT3G53400:CDS;AT3G53402:three_prime_UTR;		0.139141		hyper		no		UM
Chr5	21581868	21582223			AT5TE77730:transposable_element;		0.108506		hyper		no		n/a
Chr3	20149113	20149310			AT3G54440:CDS;		0.100902		hyper		no		CG-gbm
Chr5	19620733	19620764			AT5G48410:CDS;		0.166777		hyper		no		UM
Chr1	24822972	24823249			AT1TE81525:transposable_element;		0.282445		hyper		no		n/a
Chr4	5828013	5828290			Intergenic		0.160773		hyper		no		n/a
Chr1	26653935	26654166			Intergenic		0.11058		hyper		no		n/a
Chr3	7132609	7132829			AT3TE29960:transposable_element;		0.1939		hyper		no		n/a
Chr5	25844566	25844623			AT5TE93010:transposable_element;AT5TE93015:transposable_element;		0.106851		hyper		no		n/a
Chr1	6919909	6919985			AT1G19940:CDS;		0.102783		hyper		no		UM
Chr1	12993619	12993749			AT1TE42375:transposable_element;		0.198839		hyper		no		n/a
Chr5	8583439	8583841			Intergenic		0.146601		hyper		no		n/a
Chr1	6661768	6661978			AT1TE21575:transposable_element;		0.104277		hyper		no		n/a
Chr3	5641523	5641792			AT3G16565:CDS;		0.204358		hyper		no		UM
Chr4	8098476	8098538			AT4G14030:CDS;		0.197609		hyper		no		UM
Chr1	12581693	12581856			Intergenic		0.15955		hyper		no		n/a
Chr5	19145524	19145616			AT5G47140:CDS;		0.135433		hyper		no		UM
Chr1	12564095	12564252			AT1TE40925:transposable_element;		0.321335		hyper		no		n/a
Chr4	8744243	8744376			AT4G15320:CDS;AT4TE39045:transposable_element;AT4TE39050:transposable_element;		0.246932		hyper		no		UM
Chr3	7729711	7729866			AT3G21940:CDS;		0.153184		hyper		no		UM
Chr4	12168429	12168553			AT4G23260:CDS;		0.125942		hyper		no		UM
Chr2	3477552	3477749			AT2G07787:five_prime_UTR;		0.136125		hyper		no		UM
Chr1	25568474	25568703			AT1G68210:CDS;		0.157669		hyper		no		UM
Chr2	14017876	14018021			AT2G33030:CDS;		0.120825		hyper		no		UM
Chr1	25500719	25500806			AT1G68030:CDS;		0.207441		hyper		no		UM
Chr1	24993656	24993792			AT1G66970:CDS;		0.242546		hyper		no		UM
Chr2	314348	314439			AT2TE01310:transposable_element;		0.166074		hyper		no		n/a
Chr4	791303	791389			Intergenic		0.132133		hyper		no		n/a
Chr2	1619233	1619392			AT2G04630:CDS;		0.179495		hyper		no		UM
Chr3	20143984	20144309			AT3TE81870:transposable_element;		0.206543		hyper		no		n/a
Chr4	11455202	11455447			AT4G21530:CDS;		0.158129		hyper		no		CG-gbm
Chr1	10105583	10105796			Intergenic		0.206551		hyper		no		n/a
Chr4	10881530	10881684			AT4G20130:CDS;		0.127807		hyper		no		CG-gbm
Chr1	19930428	19930504			AT1G53420:CDS;		0.166499		hyper		no		UM
Chr1	9357820	9357840			Intergenic		0.219041		hyper		no		n/a
Chr2	7496733	7496833			Intergenic		0.158277		hyper		no		n/a
Chr1	4838785	4838834			AT1G14140:CDS;		0.176335		hyper		no		UM
Chr1	15923522	15923617			AT1TE52480:transposable_element;		0.218005		hyper		no		n/a
Chr3	20788415	20788433			AT3TE84550:transposable_element;		0.121234		hyper		no		n/a
Chr3	5021527	5021717			AT3G14930:CDS;		0.102349		hyper		no		UM
Chr1	24584089	24584165			AT1G66040:CDS;		0.154988		hyper		no		UM
Chr3	20566900	20567042			AT3G55480:CDS;		0.209339		hyper		no		UM
Chr3	9140005	9140063			AT3G25090:three_prime_UTR,CDS;		0.143295		hyper		no		CHH-gene
Chr4	12003435	12003573			AT4TE55595:transposable_element;		0.216197		hyper		no		n/a
Chr4	5843949	5844042			AT4TE24580:transposable_element;		0.175006		hyper		no		n/a
Chr1	8170198	8170424			AT1TE26305:transposable_element;		0.153396		hyper		no		n/a
Chr3	7094167	7094225			AT3TE29800:transposable_element;		0.243705		hyper		no		n/a
Chr1	1394528	1394567			AT1G04920:CDS;		0.109129		hyper		yes		UM
Chr5	15061109	15061318			AT5TE54390:transposable_element;AT5TE54395:transposable_element;		0.211267		hyper		no		n/a
Chr2	6417669	6417822			AT2TE26210:transposable_element;		0.138763		hyper		no		n/a
Chr2	3404089	3404452			Intergenic		0.330293		hyper		no		n/a
Chr5	8123253	8123514			AT5TE29380:transposable_element;		0.213687		hyper		no		n/a
Chr3	20669886	20670159			Intergenic		0.176421		hyper		no		n/a
Chr2	16239992	16240196			AT2G38880:three_prime_UTR,CDS;		0.13305		hyper		no		UM
Chr3	18431344	18431540			Intergenic		0.129062		hyper		no		n/a
Chr2	12985703	12985741			Intergenic		0.230171		hyper		no		n/a
Chr1	19495122	19495163			AT1G52343:CDS;		0.205334		hyper		no		UM
Chr5	20439324	20439524			AT5TE73640:transposable_element;		0.138686		hyper		no		n/a
Chr5	26037355	26037585			Intergenic		0.174616		hyper		no		n/a
Chr2	253989	254125			Intergenic		0.241094		hyper		no		n/a
Chr4	9266284	9266568			AT4TE41710:transposable_element;		0.136791		hyper		no		n/a
Chr2	14829496	14829543			AT2G35170:CDS;		0.183037		hyper		no		UM
Chr1	5239698	5239757			AT1G15215:three_prime_UTR,CDS;		0.170667		hyper		no		CG-gbm
Chr3	6810094	6810215			AT3TE28600:transposable_element;		0.258497		hyper		no		n/a
Chr1	3425267	3425533			AT1G10417:CDS;		0.1746		hyper		no		UM
Chr5	4312208	4312603			AT5TE15610:transposable_element;		0.193334		hyper		no		n/a
Chr1	22090228	22090311			AT1G59990:three_prime_UTR;		0.145045		hyper		no		UM
Chr4	7318613	7318666			AT4G12330:CDS;		0.148243		hyper		no		UM
Chr1	7571857	7572064			AT1G21600:CDS;		0.162424		hyper		no		UM
Chr1	7155595	7155656			AT1G20640:CDS;		0.120422		hyper		no		CG-gbm
Chr1	21963162	21963289			Intergenic		0.106988		hyper		no		n/a
Chr4	14513077	14513157			AT4G29590:CDS;		0.213572		hyper		no		UM
Chr1	17129156	17129277			AT1TE56715:transposable_element;		0.214451		hyper		no		n/a
Chr3	1821428	1821627			AT3G06030:CDS;		0.126537		hyper		no		UM
Chr3	8288145	8288224			AT3G23220:CDS;		0.178677		hyper		no		UM
Chr2	11360118	11360280			AT2TE49135:transposable_element;		0.167763		hyper		no		n/a
Chr5	8320699	8320828			Intergenic		0.163509		hyper		no		n/a
Chr1	24901044	24901180			AT1TE81810:transposable_element;		0.149433		hyper		no		n/a
Chr5	21304274	21304316			AT5TE76705:transposable_element;		0.199254		hyper		no		n/a
Chr2	12674654	12674688			AT2G29650:CDS;		0.135726		hyper		no		UM
Chr2	12472212	12472364			Intergenic		0.143681		hyper		no		n/a
Chr1	8257419	8257483			AT1G23260:CDS;		0.316266		hyper		no		UM
Chr4	10166644	10166698			AT4TE46275:transposable_element;		0.155536		hyper		no		n/a
Chr4	2427201	2427329			AT4G04760:CDS;AT4TE11315:transposable_element;AT4TE11320:transposable_element;		0.169557		hyper		no		CHG-gene
Chr1	27474599	27474717			AT1G73030:CDS;		0.291351		hyper		no		UM
Chr2	10483600	10483681			AT2G24650:CDS;		0.146031		hyper		no		UM
Chr4	11768920	11769174			AT4TE54430:transposable_element;		0.196658		hyper		no		n/a
Chr1	23393536	23393659			AT1TE77055:transposable_element;		0.246641		hyper		no		n/a
Chr2	9235051	9235114			Intergenic		0.176262		hyper		no		n/a
Chr5	23788267	23788328			Intergenic		0.212759		hyper		no		n/a
Chr4	6671291	6671347			AT4TE28605:transposable_element;		0.13544		hyper		no		n/a
Chr5	3321713	3321758			AT5G10520:CDS;		0.124124		hyper		no		UM
Chr5	23857584	23857701			Intergenic		0.102541		hyper		no		n/a
Chr5	16826148	16826210			Intergenic		0.194739		hyper		no		n/a
Chr5	23037664	23037711			Intergenic		0.455924		hyper		no		n/a
Chr5	7969115	7969222			AT5TE28860:transposable_element;		0.426645		hyper		no		n/a
Chr1	11974644	11975057			AT1TE38755:transposable_element;		0.20882		hyper		no		n/a
Chr5	22605809	22605840			Intergenic		0.109179		hyper		no		n/a
Chr3	21043109	21043266			AT3G56830:CDS;		0.217627		hyper		no		UM
Chr1	11875821	11875890			AT1G32790:CDS;		0.131533		hyper		no		UM
Chr1	26162317	26162348			AT1G69570:CDS;AT1G69572:ncRNA;		0.140042		hyper		no		UM
Chr3	16183968	16184009			AT3TE65550:transposable_element;		0.101416		hyper		no		n/a
Chr5	21100105	21100118			AT5TE76000:transposable_element;		0.229054		hyper		no		n/a
Chr3	4385570	4385715			AT3G13460:three_prime_UTR,CDS;		0.184312		hyper		no		UM
Chr2	8989961	8990116			AT2G20900:CDS;		0.191909		hyper		no		UM
Chr3	17202711	17202734			Intergenic		0.179523		hyper		no		n/a
Chr2	7897412	7897540			Intergenic		0.108578		hyper		no		n/a
Chr4	7374576	7374803			AT4TE32115:transposable_element;		0.264435		hyper		no		n/a
Chr4	15909300	15909325			AT4G32960:CDS;		0.132619		hyper		no		UM
Chr2	11436757	11436772			AT2TE49535:transposable_element;		0.383781		hyper		no		n/a
Chr4	7139811	7140038			Intergenic		0.144363		hyper		no		n/a
Chr1	21391756	21392051			AT1TE70625:transposable_element;		0.116576		hyper		no		n/a
Chr1	4456175	4456205			AT1G13070:pseudogene;		0.270021		hyper		no		n/a
Chr3	16814281	16814317			Intergenic		0.235581		hyper		no		n/a
Chr3	20090857	20090949			Intergenic		0.137566		hyper		no		n/a
Chr5	2920534	2920584			AT5G09400:CDS;		0.124748		hyper		no		CG-gbm
Chr3	8931368	8931484			AT3TE37365:transposable_element;		0.316832		hyper		no		n/a
Chr5	19700315	19700373			AT5TE70890:transposable_element;		0.217244		hyper		no		n/a
Chr3	7280182	7280219			Intergenic		0.112349		hyper		no		n/a
Chr5	18490736	18490860			AT5TE66565:transposable_element;		0.224494		hyper		no		n/a
ChrM	93193	93310			no match		0.170482		hyper		no		n/a
Chr2	6636299	6636555			AT2TE27040:transposable_element;		0.20766		hyper		no		n/a
Chr1	19791389	19791532			AT1G53110:CDS;		0.166246		hyper		no		UM
Chr2	12455274	12455302			AT2G28990:CDS;		0.101541		hyper		no		UM
Chr2	1246898	1247215			AT2G03960:pseudogene;		0.203394		hyper		no		n/a
Chr1	26127334	26127451			AT1G69510:CDS;		0.160676		hyper		no		CG-gbm
Chr4	12844965	12844982			AT4TE60035:transposable_element;		0.290539		hyper		no		n/a
Chr1	26807950	26808085			AT1G71070:CDS;		0.323933		hyper		no		UM
Chr1	17667542	17667587			Intergenic		0.141285		hyper		no		n/a
Chr5	15035055	15035134			Intergenic		0.16948		hyper		no		n/a
Chr3	6017895	6018063			AT3G17590:CDS;		0.180061		hyper		no		UM
Chr3	4154692	4154851			AT3G12980:three_prime_UTR;		0.149924		hyper		no		CG-gbm
Chr1	2415147	2415205			AT1G07800:transposable_element_gene;AT1TE07880:transposable_element;		0.145835		hyper		no		n/a
Chr2	803055	803112			AT2G02810:CDS;		0.220758		hyper		no		UM
Chr4	16118284	16118307			AT4G33510:CDS;		0.174689		hyper		no		UM
Chr5	26015219	26015253			AT5TE93630:transposable_element;		0.229648		hyper		no		n/a
Chr2	10837153	10837250			Intergenic		0.167952		hyper		no		n/a
Chr3	21364088	21364177			Intergenic		0.253976		hyper		no		n/a
Chr5	3248545	3248701			AT5G10330:CDS;		0.1652		hyper		no		UM
Chr3	15566145	15566418			AT3TE63005:transposable_element;		0.217331		hyper		no		n/a
Chr1	18899398	18899569			AT1G50970:CDS;		0.148258		hyper		no		UM
Chr1	6123425	6123429			AT1TE19795:transposable_element;		0.189611		hyper		no		n/a
Chr2	11315806	11315896			Intergenic		0.245833		hyper		no		n/a
Chr4	7937336	7937384			AT4G13640:CDS;		0.226634		hyper		no		UM
Chr5	20773010	20773079			AT5G51090:CDS;		0.313509		hyper		no		CHH-gene
Chr4	1781108	1781219			AT4TE08920:transposable_element;		0.173437		hyper		no		n/a
Chr3	15484543	15484561			AT3TE62750:transposable_element;		0.182962		hyper		no		n/a
Chr5	20249768	20249781			Intergenic		0.29508		hyper		no		n/a
Chr1	20322516	20322577			AT1TE67170:transposable_element;		0.145625		hyper		no		n/a
Chr1	23491462	23491591			AT1G63330:CDS;		0.165736		hyper		no		UM
Chr2	12226193	12226286			AT2G28550:three_prime_UTR,CDS;		0.126998		hyper		no		UM
Chr2	9713066	9713156			Intergenic		0.26591		hyper		no		n/a
Chr1	20508635	20508723			AT1TE67755:transposable_element;		0.270805		hyper		no		n/a
Chr1	8341742	8341860			AT1G23510:CDS;		0.145652		hyper		no		UM
Chr3	8757941	8758003			Intergenic		0.220372		hyper		no		n/a
Chr1	11289347	11289371			AT1G31540:CDS;		0.143745		hyper		no		UM
Chr4	8457885	8458050			Intergenic		0.197215		hyper		no		n/a
Chr1	20453162	20453183			AT1G54840:CDS;		0.109543		hyper		no		UM
Chr5	3161516	3161559			AT5G10100:three_prime_UTR;		0.133867		hyper		no		UM
Chr2	18295761	18295921			AT2G44255:ncRNA;AT2G44260:five_prime_UTR;		0.162779		hyper		no		n/a
Chr1	21154534	21154681			AT1TE69935:transposable_element;		0.22511		hyper		no		n/a
Chr1	8740465	8740612			AT1G24686:pseudogene;		0.104846		hyper		no		n/a
Chr5	3410175	3410217			Intergenic		0.196107		hyper		yes		n/a
Chr5	6869786	6869879			Intergenic		0.158611		hyper		no		n/a
Chr1	13699756	13699864			AT1TE44855:transposable_element;		0.11887		hyper		no		n/a
Chr5	4266333	4266616			AT5TE15450:transposable_element;		0.109363		hyper		no		n/a
Chr5	26014046	26014179			AT5G65120:CDS;		0.158103		hyper		no		UM
Chr5	25105143	25105233			AT5G62540:CDS;		0.133911		hyper		no		UM
Chr2	10802022	10802049			AT2G25355:CDS;		0.171724		hyper		no		UM
Chr2	8236517	8236989			AT2TE34275:transposable_element;		0.217813		hyper		no		n/a
Chr3	11837260	11837436			AT3TE49255:transposable_element;		0.213202		hyper		no		n/a
Chr1	3382278	3382364			AT1G10310:CDS;		0.127612		hyper		no		UM
Chr5	8919346	8919449			Intergenic		0.177603		hyper		no		n/a
Chr5	15391281	15391419			AT5TE55670:transposable_element;		0.129689		hyper		no		n/a
Chr5	21805462	21805537			AT5G53710:CDS;		0.139414		hyper		no		UM
Chr4	13488752	13488822			AT4G26790:CDS;AT4G26795:ncRNA;		0.18919		hyper		no		UM
Chr5	19228236	19228309			AT5G47390:CDS;		0.203014		hyper		no		UM
Chr3	2780100	2780120			AT3G09080:CDS;		0.11092		hyper		no		UM
Chr5	21032147	21032158			AT5G51770:CDS;AT5TE75770:transposable_element;		0.145305		hyper		no		UM
Chr2	15097557	15097569			Intergenic		0.355005		hyper		no		n/a
Chr1	7201800	7201883			AT1TE23270:transposable_element;		0.14569		hyper		no		n/a
Chr2	15223275	15223297			Intergenic		0.147176		hyper		no		n/a
Chr1	24744938	24745272			AT1TE81285:transposable_element;		0.172296		hyper		no		n/a
Chr1	16264883	16265124			AT1TE53570:transposable_element;		0.180635		hyper		no		n/a
Chr3	2982764	2982865			AT3G09720:CDS;		0.108173		hyper		no		CG-gbm
Chr3	11106565	11106632			Intergenic		0.159673		hyper		no		n/a
Chr2	19333367	19333389			AT2G47060:three_prime_UTR,CDS;		0.137698		hyper		no		UM
Chr1	25750569	25750670			Intergenic		0.221147		hyper		no		n/a
Chr3	11534447	11534500			Intergenic		0.122496		hyper		no		n/a
Chr4	18377634	18377765			AT4TE89085:transposable_element;		0.207164		hyper		no		n/a
Chr1	17644563	17644646			AT1G47890:CDS;		0.11678		hyper		no		UM
Chr1	9166779	9166883			AT1G26530:CDS;		0.153587		hyper		no		UM
Chr2	7622690	7622819			AT2TE31380:transposable_element;AT2TE31385:transposable_element;		0.192842		hyper		no		n/a
Chr4	8358418	8358581			Intergenic		0.134766		hyper		no		n/a
Chr5	1516397	1516481			Intergenic		0.161801		hyper		no		n/a
Chr3	10035846	10035934			Intergenic		0.191812		hyper		no		n/a
Chr2	1824984	1825342			AT2TE08360:transposable_element;		0.209404		hyper		no		n/a
Chr4	9138253	9138318			AT4G16144:CDS;		0.115171		hyper		no		CG-gbm
Chr5	7261097	7261144			Intergenic		0.158256		hyper		no		n/a
Chr5	10803487	10803660			AT5TE39280:transposable_element;		0.141955		hyper		no		n/a
Chr5	21670413	21670632			AT5TE78060:transposable_element;		0.207529		hyper		no		n/a
Chr2	9297054	9297114			AT2G21790:CDS;		0.297572		hyper		no		UM
Chr3	10601962	10602184			AT3TE44085:transposable_element;		0.161261		hyper		no		n/a
Chr4	12993397	12993483			AT4TE60830:transposable_element;		0.176694		hyper		no		n/a
Chr3	7924505	7924520			Intergenic		0.276043		hyper		no		n/a
Chr5	23348085	23348152			AT5G57655:CDS;		0.101368		hyper		no		UM
Chr3	4685054	4685168			AT3G14120:CDS;		0.10618		hyper		no		CG-gbm
Chr5	17261393	17261532			AT5G43035:transposable_element_gene;AT5TE62380:transposable_element;AT5TE62385:transposable_element;		0.155046		hyper		no		n/a
Chr5	16510902	16510991			AT5G41280:three_prime_UTR;AT5TE59610:transposable_element;		0.258907		hyper		no		UM
Chr2	5771235	5771270			AT2G13810:CDS;		0.302308		hyper		no		UM
Chr3	4637294	4637409			AT3G14010:CDS;		0.158058		hyper		no		CG-gbm
Chr4	10112140	10112216			Intergenic		0.224391		hyper		no		n/a
Chr2	12934884	12934919			AT2G30350:CDS;		0.218885		hyper		no		UM
Chr2	19162767	19162862			AT2TE87240:transposable_element;		0.163456		hyper		no		n/a
Chr2	628081	628212			AT2G02380:CDS;		0.110708		hyper		no		UM
Chr5	9055477	9055565			AT5TE32755:transposable_element;		0.205079		hyper		no		n/a
Chr1	6387928	6387958			AT1G18560:CDS;		0.132121		hyper		no		CG-gbm
Chr2	16334978	16335045			AT2G39170:CDS;		0.131773		hyper		yes		CG-gbm
Chr4	16880909	16880976			Intergenic		0.112261		hyper		no		n/a
Chr1	27032224	27032418			Intergenic		0.157067		hyper		no		n/a
Chr5	6594285	6594378			Intergenic		0.165734		hyper		no		n/a
Chr2	17567507	17567531			AT2G42130:CDS;		0.189947		hyper		no		UM
Chr1	18759310	18759350			Intergenic		0.168987		hyper		no		n/a
Chr4	12338222	12338308			AT4TE57345:transposable_element;		0.1039		hyper		no		n/a
Chr1	11563194	11563263			AT1G32140:CDS;		0.121654		hyper		no		UM
Chr3	21947306	21947396			AT3G59390:CDS;		0.101789		hyper		no		UM
Chr1	17061559	17061670			AT1TE56455:transposable_element;		0.187101		hyper		no		n/a
Chr1	7078070	7078121			Intergenic		0.214105		hyper		no		n/a
Chr1	21064909	21065040			AT1G56260:CDS;		0.142374		hyper		no		UM
Chr4	2509008	2509052			Intergenic		0.131995		hyper		no		n/a
Chr1	11603163	11603256			AT1G32200:CDS;		0.113627		hyper		no		UM
Chr3	1886323	1886369			AT3G06230:CDS;		0.103245		hyper		no		UM
Chr3	1826516	1826615			AT3G06050:CDS;		0.111287		hyper		no		UM
Chr2	1927517	1927684			Intergenic		0.22787		hyper		no		n/a
Chr4	451554	451633			AT4G01037:CDS;AT4TE02340:transposable_element;		0.100573		hyper		no		CG-gbm
Chr4	12844319	12844604			AT4TE60035:transposable_element;		0.227279		hyper		no		n/a
Chr5	14139366	14139494			AT5TE50470:transposable_element;		0.194193		hyper		no		n/a
Chr1	17187217	17187308			AT1TE56940:transposable_element;		0.128021		hyper		no		n/a
Chr3	3418869	3418963			AT3G10920:CDS;		0.190731		hyper		no		UM
Chr5	20856817	20856851			AT5G51320:transposable_element_gene;		0.150878		hyper		no		n/a
Chr1	12962213	12962223			AT1G35320:CDS;		0.122595		hyper		no		UM
Chr1	20700356	20700374			Intergenic		0.317057		hyper		no		n/a
Chr3	3501259	3501269			AT3G11170:CDS;		0.144979		hyper		no		UM
Chr4	7622365	7622386			AT4G13070:CDS;		0.162197		hyper		no		UM
Chr4	1041984	1042044			Intergenic		0.123088		hyper		no		n/a
Chr1	22796502	22796554			Intergenic		0.125558		hyper		no		n/a
Chr4	1249083	1249132			AT4G02790:CDS;		0.119982		hyper		no		UM
Chr4	6690061	6690074			AT4G10890:CDS;		0.135686		hyper		no		CHG-gene
Chr1	23723493	23723608			Intergenic		0.159989		hyper		no		n/a
Chr2	12124719	12124742			AT2G28360:CDS;		0.136786		hyper		no		CG-gbm
Chr5	10496717	10496739			Intergenic		0.152842		hyper		no		n/a
Chr3	16956029	16956065			AT3G46180:CDS;		0.189005		hyper		no		UM
Chr5	5844735	5844855			AT5TE21140:transposable_element;AT5TE21145:transposable_element;		0.184198		hyper		no		n/a
Chr2	18355664	18355764			AT2G44470:CDS;		0.190907		hyper		no		CHH-gene
Chr4	13248596	13248644			Intergenic		0.125545		hyper		no		n/a
Chr1	22483050	22483140			AT1TE74180:transposable_element;		0.165113		hyper		no		n/a
Chr4	6885851	6885956			AT4TE29670:transposable_element;		0.147416		hyper		no		n/a
Chr2	3252953	3253045			Intergenic		0.331013		hyper		no		n/a
Chr1	11204244	11204405			AT1TE36210:transposable_element;		0.150093		hyper		no		n/a
Chr5	15628533	15628570			AT5G39040:CDS;		0.113461		hyper		no		CG-gbm
Chr2	7521975	7522002			AT2TE30925:transposable_element;		0.143263		hyper		no		n/a
Chr1	18548185	18548289			AT1G50050:CDS;		0.188388		hyper		no		UM
Chr1	10159082	10159210			AT1TE32785:transposable_element;		0.161934		hyper		no		n/a
Chr2	9091349	9091483			AT2TE38420:transposable_element;		0.194495		hyper		no		n/a
Chr5	19823924	19823961			AT5TE71355:transposable_element;		0.136564		hyper		no		n/a
Chr1	22350747	22350970			AT1G60690:CDS;		0.210229		hyper		no		UM
Chr2	13204109	13204134			AT2G31020:CDS;		0.292032		hyper		no		UM
Chr1	16923002	16923244			AT1TE56030:transposable_element;		0.162456		hyper		no		n/a
Chr5	6630435	6630549			AT5TE24010:transposable_element;		0.145138		hyper		no		n/a
Chr5	13925903	13925918			Intergenic		0.171645		hyper		no		n/a
Chr1	4707786	4707877			AT1TE15240:transposable_element;		0.15079		hyper		no		n/a
Chr3	3392048	3392058			AT3G10840:CDS;		0.310665		hyper		no		UM
Chr5	16611881	16611960			AT5G41530:CDS;		0.186566		hyper		no		UM
Chr1	2335190	2335200			AT1TE07620:transposable_element;		0.18327		hyper		no		n/a
Chr3	11248122	11248238			Intergenic		0.206898		hyper		no		n/a
Chr3	18552992	18553136			AT3TE75265:transposable_element;		0.214659		hyper		no		n/a
Chr3	15407313	15407430			AT3G43520:CDS;		0.106946		hyper		no		UM
Chr2	8643254	8643267			Intergenic		0.168958		hyper		no		n/a
Chr5	26233612	26233622			Intergenic		0.190591		hyper		no		n/a
Chr4	7322884	7322894			AT4TE31900:transposable_element;		0.166958		hyper		no		n/a
Chr3	22700523	22700565			Intergenic		0.155336		hyper		no		n/a
Chr4	5443373	5443478			AT4TE22785:transposable_element;		0.103548		hyper		no		n/a
Chr1	1400135	1400227			AT1G04940:CDS;AT1G04945:CDS;		0.110431		hyper		no		UM
Chr3	17649795	17649920			AT3G47833:three_prime_UTR,CDS;		0.213452		hyper		no		UM
Chr5	7489075	7489110			AT5TE27080:transposable_element;		0.17102		hyper		no		n/a
Chr3	3105702	3105721			AT3G10070:CDS;		0.205798		hyper		no		UM
Chr4	8863652	8863683			AT4G15520:CDS;		0.196557		hyper		no		UM
Chr5	12089664	12089701			AT5TE43135:transposable_element;		0.159731		hyper		no		n/a
Chr5	22098226	22098332			AT5G54430:CDS;		0.195861		hyper		no		UM
Chr1	23021536	23021725			Intergenic		0.175674		hyper		no		n/a
Chr5	9358064	9358142			Intergenic		0.148198		hyper		no		n/a
Chr1	12143604	12143656			AT1TE39405:transposable_element;		0.163999		hyper		no		n/a
Chr4	11635137	11635184			AT4TE53740:transposable_element;AT4TE53745:transposable_element;		0.170514		hyper		no		n/a
Chr5	22521536	22521581			AT5G55590:CDS;		0.110434		hyper		no		UM
Chr5	952036	952078			Intergenic		0.229013		hyper		no		n/a
Chr1	19630664	19630719			AT1TE64930:transposable_element;		0.194274		hyper		no		n/a
Chr3	6215627	6215734			AT3G18145:pseudogene;		0.266107		hyper		no		n/a
Chr4	15909852	15909880			AT4G32960:CDS;		0.11743		hyper		no		UM
Chr3	10709335	10709390			AT3TE44490:transposable_element;		0.100748		hyper		no		n/a
Chr3	19298528	19298653			Intergenic		0.128337		hyper		no		n/a
Chr5	9702435	9702441			AT5TE35185:transposable_element;		0.251233		hyper		no		n/a
Chr1	11492776	11492819			AT1TE37175:transposable_element;		0.17958		hyper		no		n/a
Chr4	6009557	6009573			Intergenic		0.285856		hyper		no		n/a
Chr3	3888344	3888350			AT3G12200:CDS;		0.122317		hyper		no		CG-gbm
Chr4	10056820	10056981			AT4G18160:CDS;		0.188705		hyper		no		UM
Chr5	5717125	5717283			Intergenic		0.14672		hyper		no		n/a
Chr3	19245069	19245166			AT3G51870:CDS;		0.175646		hyper		no		UM
Chr4	9217443	9217736			AT4TE41455:transposable_element;		0.176808		hyper		no		n/a
Chr2	17911280	17911328			AT2G43070:CDS;		0.138621		hyper		no		UM
Chr2	6707112	6707177			AT2TE27400:transposable_element;AT2TE27405:transposable_element;		0.145683		hyper		no		n/a
Chr5	24994416	24994557			AT5TE89930:transposable_element;		0.137059		hyper		no		n/a
Chr5	8808125	8808204			AT5TE31870:transposable_element;		0.254936		hyper		no		n/a
Chr1	24064322	24064344			Intergenic		0.123603		hyper		no		n/a
Chr5	2560252	2560309			Intergenic		0.213115		hyper		no		n/a
Chr3	17945393	17945408			AT3TE72710:transposable_element;		0.171695		hyper		no		n/a
Chr5	3031665	3031695			AT5TE11030:transposable_element;		0.183602		hyper		no		n/a
Chr1	27937195	27937206			AT1G74310:CDS;		0.188822		hyper		no		UM
Chr3	19521324	19521471			AT3TE79240:transposable_element;		0.143433		hyper		no		n/a
Chr3	9630245	9630310			AT3G26280:three_prime_UTR;AT3TE40165:transposable_element;		0.133863		hyper		no		UM
Chr4	9999189	9999424			Intergenic		0.157162		hyper		no		n/a
Chr2	9065996	9066008			AT2G21150:CDS;		0.197412		hyper		no		UM
Chr2	7044225	7044468			AT2TE28670:transposable_element;		0.17435		hyper		no		n/a
Chr3	21625846	21625956			AT3G58460:CDS;		0.253733		hyper		no		UM
Chr2	3180367	3180408			AT2TE13745:transposable_element;		0.15353		hyper		no		n/a
Chr3	11085370	11085379			AT3G29110:CDS;		0.135913		hyper		no		UM
Chr1	19704354	19704491			AT1TE65110:transposable_element;AT1TE65115:transposable_element;		0.233242		hyper		no		n/a
Chr2	19425563	19425599			AT2G47310:CDS;		0.157874		hyper		no		UM
Chr5	18821285	18821332			AT5G46400:CDS;		0.140041		hyper		no		CG-gbm
Chr5	16107409	16107418			AT5G40290:CDS;		0.144794		hyper		no		UM
Chr3	1385988	1386073			AT3TE05850:transposable_element;AT3TE05855:transposable_element;		0.129401		hyper		no		n/a
Chr1	29623639	29623819			AT1G78790:three_prime_UTR;		0.113804		hyper		no		UM
Chr1	19316125	19316228			Intergenic		0.123975		hyper		no		n/a
Chr5	19415725	19415853			AT5TE69855:transposable_element;		0.261535		hyper		no		n/a
Chr3	12168749	12168846			Intergenic		0.157691		hyper		no		n/a
Chr5	9267463	9267546			AT5G26570:three_prime_UTR,CDS;		0.124102		hyper		no		CG-gbm
Chr2	15651323	15651347			AT2G37280:CDS;		0.186679		hyper		no		UM
Chr5	20879065	20879077			AT5G51400:CDS;		0.155091		hyper		no		UM
Chr1	10181252	10181269			AT1G29150:CDS;		0.161897		hyper		no		CG-gbm
Chr2	10652042	10652164			AT2TE45665:transposable_element;		0.169471		hyper		no		n/a
Chr2	10842070	10842124			AT2TE46570:transposable_element;		0.14642		hyper		no		n/a
Chr3	9387846	9387891			AT3TE39220:transposable_element;		0.111291		hyper		no		n/a
Chr1	14175777	14175951			AT1G37150:CDS;		0.167373		hyper		no		UM
Chr1	3538217	3538236			AT1G10670:three_prime_UTR;		0.168668		hyper		no		UM
Chr3	22664375	22664387			AT3G61220:three_prime_UTR;		0.257015		hyper		no		UM
Chr2	18501384	18501394			AT2G44860:CDS;		0.167501		hyper		no		UM
Chr2	1174649	1174719			Intergenic		0.263064		hyper		no		n/a
Chr5	20960035	20960102			Intergenic		0.148676		hyper		no		n/a
Chr4	1780741	1780795			AT4TE08920:transposable_element;		0.152902		hyper		no		n/a
Chr3	15989301	15989358			AT3TE64730:transposable_element;		0.138149		hyper		no		n/a
Chr2	6021753	6021813			AT2G14210:CDS;		0.223071		hyper		no		UM
Chr3	11990442	11990477			AT3G30386:pseudogene;		0.34333		hyper		no		n/a
Chr1	24277555	24277566			Intergenic		0.129138		hyper		no		n/a
Chr4	8024408	8024421			AT4G13870:CDS;		0.162846		hyper		no		UM
Chr5	25983180	25983236			AT5G65050:CDS;		0.173105		hyper		no		UM
Chr4	12691914	12691938			AT4G24580:CDS;		0.107122		hyper		no		UM
Chr3	6874623	6874688			AT3G19780:three_prime_UTR,CDS;AT3G19790:three_prime_UTR;		0.121608		hyper		no		CG-gbm
Chr3	9020074	9020202			AT3TE37705:transposable_element;		0.189164		hyper		no		n/a
Chr1	16309295	16309341			AT1G43245:CDS;		0.180383		hyper		no		UM
Chr5	8347279	8347288			AT5G24440:CDS;		0.223474		hyper		no		UM
Chr1	25879833	25879871			Intergenic		0.129685		hyper		no		n/a
Chr1	29970575	29970664			AT1G79640:CDS;		0.11035		hyper		no		UM
Chr5	20419719	20419855			AT5TE73555:transposable_element;		0.175159		hyper		no		n/a
Chr5	7934654	7934680			Intergenic		0.123589		hyper		no		n/a
Chr2	15402450	15402484			Intergenic		0.123394		hyper		no		n/a
Chr4	18292160	18292200			AT4G39330:CDS;		0.157923		hyper		no		UM
Chr3	9300082	9300091			Intergenic		0.202213		hyper		no		n/a
Chr5	2927258	2927308			AT5G09410:three_prime_UTR,CDS;		0.178609		hyper		no		CG-gbm
Chr4	16835866	16835875			Intergenic		0.133936		hyper		no		n/a
Chr5	2181306	2181340			AT5G07020:CDS;		0.118462		hyper		no		UM
Chr3	9135977	9136125			Intergenic		0.154344		hyper		no		n/a
Chr3	19437460	19437501			AT3TE78890:transposable_element;		0.203567		hyper		no		n/a
Chr4	2993213	2993334			Intergenic		0.135018		hyper		no		n/a
Chr5	18092235	18092302			AT5G44800:five_prime_UTR;		0.110035		hyper		no		CG-gbm
Chr3	22763281	22763464			AT3TE92780:transposable_element;AT3TE92785:transposable_element;		0.121639		hyper		no		n/a
Chr4	5564173	5564195			Intergenic		0.131832		hyper		no		n/a
Chr4	1190343	1190467			AT4G02700:CDS;		0.125448		hyper		no		UM
Chr4	5292958	5292970			Intergenic		0.137247		hyper		no		n/a
Chr4	12948571	12948736			AT4TE60585:transposable_element;		0.189262		hyper		no		n/a
Chr3	9331545	9331587			AT3TE38975:transposable_element;		0.131337		hyper		no		n/a
Chr3	9332513	9332521			Intergenic		0.130933		hyper		no		n/a
Chr5	18961747	18961772			Intergenic		0.21183		hyper		no		n/a
Chr2	1582540	1582614			AT2G04540:CDS;		0.140381		hyper		no		UM
Chr3	11162483	11162526			AT3G29190:CDS;		0.160041		hyper		no		UM
Chr3	18976543	18976643			Intergenic		0.243906		hyper		no		n/a
Chr1	19654267	19654274			Intergenic		0.117218		hyper		no		n/a
Chr3	11836896	11836915			AT3TE49255:transposable_element;		0.149978		hyper		no		n/a
Chr1	12136646	12136659			AT1TE39360:transposable_element;		0.121708		hyper		no		n/a
Chr4	417466	417497			AT4TE02165:transposable_element;		0.148328		hyper		no		n/a
Chr5	1369269	1369276			AT5G04740:CDS;		0.187911		hyper		no		UM
Chr3	5658573	5658576			AT3G16620:CDS;		0.102692		hyper		yes		CG-gbm
Chr1	10013546	10013563			AT1G28480:three_prime_UTR;		0.115621		hyper		no		UM
Chr4	8625408	8625432			AT4TE38420:transposable_element;		0.160881		hyper		no		n/a
Chr3	1873657	1873744			AT3G06180:three_prime_UTR;		0.139625		hyper		no		UM
Chr1	25197422	25197441			AT1TE82695:transposable_element;		0.176763		hyper		no		n/a
Chr5	16540535	16540757			AT5TE59735:transposable_element;		0.120425		hyper		no		n/a
Chr1	12427897	12427913			AT1G34120:CDS;		0.10822		hyper		no		CG-gbm
Chr3	3873795	3873809			AT3TE16310:transposable_element;		0.13032		hyper		no		n/a
Chr3	10187388	10187402			AT3TE42340:transposable_element;		0.122879		hyper		no		n/a
ChrM	251365	251527			no match		0.27634		hyper		no		n/a
Chr1	17939416	17939425			AT1TE59545:transposable_element;		0.14267		hyper		no		n/a
Chr4	12004016	12004055			AT4TE55595:transposable_element;		0.175444		hyper		no		n/a
Chr2	7024217	7024232			AT2TE28580:transposable_element;		0.187643		hyper		no		n/a
Chr4	14470772	14470794			AT4G29420:CDS;		0.173706		hyper		no		UM
Chr5	22730359	22730473			AT5G56150:CDS;		0.128715		hyper		no		UM
Chr2	6253848	6253889			Intergenic		0.118269		hyper		no		n/a
Chr2	11968262	11968295			AT2G28085:CDS;		0.130256		hyper		no		UM
Chr1	12455053	12455100			Intergenic		0.12333		hyper		no		n/a
Chr1	2423224	2423304			AT1G07830:CDS;		0.138983		hyper		no		UM
Chr3	9527622	9527820			AT3G26070:CDS;		0.101655		hyper		no		UM
Chr5	8510801	8510842			Intergenic		0.193494		hyper		no		n/a
Chr3	6732885	6732898			AT3G19420:CDS;		0.156854		hyper		no		CG-gbm
Chr3	9394064	9394163			AT3G25727:CDS;		0.141711		hyper		no		CHH-gene
Chr1	16778106	16778114			AT1TE55450:transposable_element;		0.151984		hyper		no		n/a
Chr5	19466374	19466386			AT5G48030:CDS;		0.163711		hyper		no		CG-gbm
Chr2	600213	600221			Intergenic		0.13315		hyper		no		n/a
Chr5	16525641	16525874			AT5TE59675:transposable_element;		0.160454		hyper		no		n/a
Chr1	9939743	9939785			Intergenic		0.148246		hyper		no		n/a
Chr5	4354316	4354339			AT5G13530:CDS;		0.108094		hyper		no		CG-gbm
Chr2	11436404	11436447			AT2TE49535:transposable_element;		0.19398		hyper		no		n/a
Chr2	8218237	8218246			Intergenic		0.38064		hyper		no		n/a
Chr4	11690971	11691025			Intergenic		0.140587		hyper		no		n/a
Chr3	20286429	20286439			AT3G54800:CDS;		0.152378		hyper		no		UM
Chr3	22659151	22659167			AT3G61210:CDS;		0.108388		hyper		no		UM
Chr3	22193929	22193934			AT3G60100:CDS;		0.15635		hyper		no		UM
Chr3	871141	871161			AT3G03610:CDS;		0.216993		hyper		no		UM
Chr2	15655676	15655699			AT2G37280:CDS;		0.149647		hyper		no		UM
Chr2	8241412	8241416			AT2G19000:CDS;		0.173097		hyper		no		UM
Chr1	19984091	19984161			AT1G53550:CDS;		0.129568		hyper		no		UM
Chr3	4877527	4877602			AT3G14520:CDS;		0.105174		hyper		no		UM
Chr3	6213613	6213639			AT3G18140:CDS;		0.157501		hyper		no		UM
Chr4	10748247	10748295			AT4TE49240:transposable_element;		0.11007		hyper		no		n/a
Chr4	7011924	7011977			AT4TE30310:transposable_element;		0.119922		hyper		no		n/a
Chr2	18824474	18824480			AT2G45690:CDS;		0.148956		hyper		no		CG-gbm
Chr5	3186650	3186658			AT5G10160:CDS;		0.2184		hyper		no		UM
Chr2	5515247	5515303			AT2TE22305:transposable_element;		0.170593		hyper		no		n/a
Chr2	11641530	11641561			AT2TE50550:transposable_element;		0.102278		hyper		no		n/a
Chr3	5542896	5542902			AT3G16340:CDS;		0.157224		hyper		no		UM
Chr2	15812352	15812364			AT2G37700:CDS;		0.139359		hyper		no		UM
Chr4	8425450	8425482			AT4G14710:CDS;		0.110973		hyper		yes		UM
Chr4	11106313	11106491			AT4G20720:CDS;		0.315424		hyper		no		UM
Chr1	27371603	27371644			AT1G72700:three_prime_UTR;		0.158794		hyper		no		CG-gbm
Chr5	15864698	15864732			AT5G39620:CDS;		0.155719		hyper		no		CHH-gene
Chr2	1082281	1082436			Intergenic		0.114826		hyper		no		n/a
Chr3	19180541	19180648			AT3G51700:CDS;		0.136591		hyper		no		UM
Chr4	8574340	8574378			AT4G15010:CDS;		0.118757		hyper		no		UM
Chr1	10127442	10127570			Intergenic		0.119966		hyper		no		n/a
Chr1	18948096	18948174			Intergenic		0.205483		hyper		no		n/a
Chr1	23213833	23213930			AT1TE76530:transposable_element;		0.120274		hyper		no		n/a
Chr3	9766148	9766249			AT3TE40650:transposable_element;		0.124503		hyper		no		n/a
Chr5	17375435	17375650			Intergenic		0.163679		hyper		no		n/a
Chr3	1788186	1788288			AT3G05970:CDS;		0.134228		hyper		no		UM
Chr2	5520883	5520999			Intergenic		0.12671		hyper		no		n/a
Chr5	20785968	20786015			AT5G51140:CDS;		0.110842		hyper		no		UM
Chr5	9763341	9763496			AT5TE35500:transposable_element;		0.117933		hyper		no		n/a
Chr5	13441815	13441870			Intergenic		0.122777		hyper		no		n/a
Chr2	1193911	1193934			Intergenic		0.130066		hyper		no		n/a
ChrM	177304	177406			no match		0.278829		hyper		no		n/a
Chr3	18167222	18167230			AT3G49010:CDS;		0.113723		hyper		no		UM
Chr1	11983852	11984060			AT1G33070:CDS;AT1TE38795:transposable_element;		0.122675		hyper		no		CHG-gene
Chr1	6226350	6226352			AT1G18090:CDS;		0.152245		hyper		no		UM
Chr3	7881072	7881089			Intergenic		0.183707		hyper		no		n/a
Chr4	7593779	7593834			AT4TE33185:transposable_element;		0.123939		hyper		no		n/a
Chr1	21860729	21860779			AT1G59510:CDS;		0.113007		hyper		no		UM
Chr2	2372349	2372568			AT2TE10930:transposable_element;AT2TE10935:transposable_element;		0.211616		hyper		no		n/a
Chr4	7347187	7347273			AT4TE32005:transposable_element;		0.335671		hyper		no		n/a
Chr1	12218654	12218663			Intergenic		0.125615		hyper		no		n/a
Chr3	8971940	8971952			AT3G24590:CDS;		0.100696		hyper		no		UM
Chr1	19363219	19363247			Intergenic		0.136781		hyper		no		n/a
Chr5	19775796	19775815			AT5G48770:CDS;AT5G48775:ncRNA;		0.127804		hyper		no		UM
Chr3	5602351	5602353			AT3G16480:CDS;		0.106091		hyper		no		CG-gbm
Chr2	11450679	11450693			AT2G26850:CDS;		0.205981		hyper		no		UM
ChrM	243413	243466			no match		0.504785		hyper		no		n/a
Chr3	5527726	5527728			AT3G16310:CDS;		0.135507		hyper		no		UM
Chr1	21651724	21652353	21651724	21652353	AT1TE71450:transposable_element;	AT1TE71450:transposable_element;	-0.233368	0.344949	hypo	hyper	no	no	n/a
Chr1	18327788	18327841	18327610	18327789	AT1G49510:CDS;	AT1G49510:CDS;	-0.204347	0.315048	hypo	hyper	no	no	UM
Chr3	23203725	23203854	23203614	23203726	AT3G62725:transposable_element_gene;AT3TE94580:transposable_element;	AT3TE94580:transposable_element;	-0.159062	0.172605	hypo	hyper	no	no	n/a
Chr1	29840216	29840529	29840292	29840330	AT1TE97600:transposable_element;AT1TE97605:transposable_element;	AT1TE97605:transposable_element;	-0.124331	0.105227	hypo	hyper	no	no	n/a
Chr1	11407472	11407574	11407058	11407496	AT1TE36890:transposable_element;	AT1TE36890:transposable_element;	-0.172022	0.193428	hypo	hyper	no	no	n/a
Chr5	17412432	17412885	17412387	17412885	AT5TE62890:transposable_element;	AT5TE62890:transposable_element;	-0.178001	0.165371	hypo	hyper	no	no	n/a
Chr3	6740465	6740472	6740465	6740472	Intergenic	Intergenic	-0.116363	0.11523	hypo	hyper	no	no	n/a
Chr5	8614971	8615082	8615030	8615082	Intergenic	Intergenic	-0.110534	0.122406	hypo	hyper	no	no	n/a
Chr5	9078404	9078634	9078404	9078634	AT5TE32830:transposable_element;AT5TE32835:transposable_element;	AT5TE32830:transposable_element;AT5TE32835:transposable_element;	-0.152888	0.130671	hypo	hyper	no	no	n/a
Chr1	12595202	12595862	12595202	12595827	AT1G34460:CDS;	AT1G34460:CDS;	-0.398604	-0.419236	hypo	hypo	yes	yes	CHH-gene
Chr5	14089198	14090089	14089007	14090134	AT5G35935:transposable_element_gene;	AT5G35935:transposable_element_gene;	-0.203881	-0.302005	hypo	hypo	yes	yes	n/a
Chr5	21689757	21691159	21689739	21692047	AT5G53450:CDS;	AT5G53450:CDS;	-0.185858	-0.494275	hypo	hypo	yes	yes	CG-gbm
Chr3	8371394	8372023	8371695	8372023	Intergenic	Intergenic	-0.352136	-0.194659	hypo	hypo	yes	no	n/a
Chr1	21268744	21269203	21268744	21268959	AT1G56730:tRNA;AT1G56740:tRNA;	AT1G56730:tRNA;	-0.266806	-0.147808	hypo	hypo	no	no	n/a
Chr3	15807687	15808332	15807687	15808332	Intergenic	Intergenic	-0.261894	-0.196953	hypo	hypo	yes	no	n/a
Chr5	7262611	7262997	7262611	7262977	AT5G21970:CDS;	AT5G21970:CDS;	-0.30305	-0.36712	hypo	hypo	yes	yes	UM
Chr3	17892685	17893189	17892613	17893173	AT3G48320:three_prime_UTR,CDS;AT3G48330:three_prime_UTR,CDS;	AT3G48320:three_prime_UTR,CDS;AT3G48330:three_prime_UTR,CDS;	-0.247595	-0.293591	hypo	hypo	yes	yes	UM
Chr4	12548294	12548653	12548116	12548482	AT4G24175:CDS;	AT4G24175:CDS;	-0.409653	-0.448479	hypo	hypo	no	no	UM
Chr2	1601647	1602479	1601993	1602479	Intergenic	Intergenic	-0.214799	-0.188512	hypo	hypo	no	no	n/a
Chr5	8081538	8082003	8081346	8082093	AT5TE29230:transposable_element;	AT5TE29230:transposable_element;	-0.288948	-0.283302	hypo	hypo	no	no	n/a
Chr4	6179856	6180466	6179856	6180466	Intergenic	Intergenic	-0.266347	-0.281425	hypo	hypo	no	no	n/a
Chr4	5606122	5606519	5606289	5606519	AT4G08780:CDS;AT4TE23490:transposable_element;	AT4G08780:CDS;AT4TE23490:transposable_element;	-0.267495	-0.219068	hypo	hypo	no	no	UM
Chr5	21155515	21155857	21155515	21155857	Intergenic	Intergenic	-0.369781	-0.384295	hypo	hypo	no	no	n/a
Chr3	21509408	21509789	21509408	21509900	Intergenic	Intergenic	-0.417564	-0.407097	hypo	hypo	yes	yes	n/a
Chr1	19171525	19171920	19171232	19172089	AT1TE63520:transposable_element;	AT1TE63520:transposable_element;AT1TE63525:transposable_element;	-0.254982	-0.360703	hypo	hypo	no	yes	n/a
Chr4	974336	974549	974336	974549	AT4G02200:three_prime_UTR;AT4G02210:CDS;	AT4G02200:three_prime_UTR;AT4G02210:CDS;	-0.28363	-0.252195	hypo	hypo	no	no	UM
Chr2	19320265	19320770	19320253	19320898	AT2G47015:miRNA;AT2G47020:three_prime_UTR,CDS;	AT2G47015:miRNA;AT2G47020:three_prime_UTR,CDS;	-0.235637	-0.275923	hypo	hypo	yes	yes	n/a
Chr4	692319	692518	692319	692369	AT4TE03570:transposable_element;	Intergenic	-0.404937	-0.404675	hypo	hypo	no	no	n/a
Chr1	10144555	10145017	10144555	10145127	AT1TE32720:transposable_element;	AT1TE32720:transposable_element;	-0.322145	-0.376817	hypo	hypo	yes	yes	n/a
Chr5	5226185	5226403	5226186	5226508	AT5G16000:CDS;	AT5G16000:CDS;	-0.279147	-0.1774	hypo	hypo	no	no	UM
Chr3	21547596	21548014	21547596	21548014	Intergenic	Intergenic	-0.404922	-0.454076	hypo	hypo	no	no	n/a
Chr1	27333910	27334155	27333910	27334155	AT1G72580:three_prime_UTR;	AT1G72580:three_prime_UTR;	-0.356554	-0.320663	hypo	hypo	no	no	UM
Chr3	9826064	9826542	9826046	9826542	AT3G26730:CDS;	AT3G26730:CDS;	-0.224122	-0.253956	hypo	hypo	yes	no	CG-gbm
Chr1	9879446	9880004	9879446	9880099	Intergenic	Intergenic	-0.283238	-0.263995	hypo	hypo	no	no	n/a
Chr1	12974184	12974742	12974122	12974763	Intergenic	Intergenic	-0.275703	-0.304432	hypo	hypo	no	no	n/a
Chr5	19373211	19373506	19373379	19373506	AT5G47830:five_prime_UTR,CDS;	AT5G47830:five_prime_UTR,CDS;	-0.214946	-0.18434	hypo	hypo	no	no	UM
Chr4	10318553	10318943	10318619	10318943	AT4G18790:CDS;	AT4G18790:CDS;	-0.159882	-0.159943	hypo	hypo	no	yes	UM
Chr4	6977565	6977809	6977673	6977809	Intergenic	Intergenic	-0.188868	-0.129434	hypo	hypo	yes	no	n/a
Chr3	18616786	18617329	18616786	18617273	AT3TE75520:transposable_element;	AT3TE75520:transposable_element;	-0.3381	-0.191666	hypo	hypo	no	no	n/a
Chr1	29394586	29394778	29394586	29394800	AT1G78120:CDS;	AT1G78120:CDS;	-0.180751	-0.182357	hypo	hypo	no	no	UM
Chr5	17582958	17583332	17582958	17583226	AT5G43755:CDS;	AT5G43755:CDS;	-0.238488	-0.243126	hypo	hypo	no	no	CHH-gene
Chr1	10669942	10670156	10669942	10670156	Intergenic	Intergenic	-0.193089	-0.217342	hypo	hypo	yes	no	n/a
Chr3	15516716	15517043	15516790	15517043	AT3G43600:CDS;	AT3G43600:CDS;	-0.121452	-0.110207	hypo	hypo	yes	yes	CG-gbm
Chr5	1402339	1402554	1402339	1402554	AT5G04830:CDS;	AT5G04830:CDS;	-0.179085	-0.220062	hypo	hypo	no	no	UM
Chr1	10491129	10491599	10491129	10491490	AT1TE33910:transposable_element;	AT1TE33910:transposable_element;	-0.300763	-0.228411	hypo	hypo	no	no	n/a
Chr3	1308250	1308430	1308250	1308407	Intergenic	Intergenic	-0.376549	-0.254012	hypo	hypo	no	no	n/a
Chr1	23758719	23759063	23758865	23759010	AT1G64040:CDS;	AT1G64040:CDS;	-0.169498	-0.15402	hypo	hypo	yes	yes	CG-gbm
Chr3	10942946	10943113	10943030	10943075	Intergenic	Intergenic	-0.294475	-0.130639	hypo	hypo	no	no	n/a
Chr1	10920189	10920271	10920189	10920271	AT1G30760:CDS;	AT1G30760:CDS;	-0.2613	-0.221301	hypo	hypo	no	no	UM
Chr2	8568167	8568580	8567981	8568638	AT2G19850:five_prime_UTR;	AT2G19850:five_prime_UTR;	-0.26919	-0.362436	hypo	hypo	no	no	UM
Chr1	20102831	20103009	20102831	20103009	AT1G53840:CDS;	AT1G53840:CDS;	-0.121387	-0.112344	hypo	hypo	no	yes	UM
Chr3	19321634	19322147	19321583	19322085	AT3G52100:CDS;	AT3G52100:CDS;	-0.21179	-0.229875	hypo	hypo	no	yes	UM
Chr3	3921840	3922099	3921755	3922099	AT3G12300:CDS;	AT3G12300:three_prime_UTR,CDS;	-0.156209	-0.196438	hypo	hypo	no	no	UM
Chr4	11518658	11518842	11518658	11518794	AT4G21680:CDS;	AT4G21680:CDS;	-0.168364	-0.156641	hypo	hypo	no	no	UM
Chr3	8301835	8302164	8301835	8301998	Intergenic	Intergenic	-0.184143	-0.171979	hypo	hypo	no	no	n/a
Chr5	5441909	5442425	5442205	5442280	AT5TE19690:transposable_element;	AT5TE19690:transposable_element;	-0.351036	-0.203194	hypo	hypo	no	no	n/a
Chr4	146763	147235	146655	147235	AT4G00335:five_prime_UTR,CDS;	AT4G00335:five_prime_UTR,CDS;	-0.226887	-0.285015	hypo	hypo	no	yes	CG-gbm
Chr3	22370612	22370738	22370612	22370738	Intergenic	Intergenic	-0.29916	-0.356505	hypo	hypo	no	no	n/a
Chr1	5779459	5779790	5779459	5779829	AT1G16900:CDS;	AT1G16900:CDS;	-0.126639	-0.161005	hypo	hypo	no	no	UM
Chr3	11761054	11761239	11761054	11761239	AT3TE48970:transposable_element;	AT3TE48970:transposable_element;	-0.174591	-0.186611	hypo	hypo	no	no	n/a
Chr5	4168428	4168674	4168428	4168674	AT5G13130:CDS;	AT5G13130:CDS;	-0.15433	-0.225742	hypo	hypo	no	yes	UM
Chr2	12465869	12466170	12465820	12466033	AT2G29010:pseudogene;	AT2G29010:pseudogene;	-0.149789	-0.154739	hypo	hypo	no	no	n/a
Chr1	12664240	12664387	12664240	12664538	Intergenic	AT1TE41345:transposable_element;	-0.181751	-0.197561	hypo	hypo	yes	yes	n/a
Chr1	22187050	22187488	22187050	22187488	Intergenic	Intergenic	-0.355219	-0.358295	hypo	hypo	no	no	n/a
Chr4	13536539	13536699	13536539	13536699	AT4TE63690:transposable_element;AT4TE63695:transposable_element;	AT4TE63690:transposable_element;AT4TE63695:transposable_element;	-0.209448	-0.162789	hypo	hypo	no	no	n/a
Chr4	8487276	8487617	8487276	8487617	AT4TE37695:transposable_element;	AT4TE37695:transposable_element;	-0.353045	-0.370879	hypo	hypo	no	no	n/a
Chr2	19664100	19664423	19664169	19664423	AT2G48070:three_prime_UTR;AT2G48075:three_prime_UTR,CDS;	AT2G48070:three_prime_UTR;AT2G48075:CDS;	-0.160572	-0.137848	hypo	hypo	no	no	UM
Chr2	12887040	12887382	12887040	12887382	Intergenic	Intergenic	-0.208368	-0.250358	hypo	hypo	no	no	n/a
Chr1	8760016	8760285	8760016	8760246	AT1G24764:CDS;	AT1G24764:CDS;	-0.22553	-0.201937	hypo	hypo	no	yes	UM
Chr3	8957510	8957743	8957583	8957705	AT3G24542:three_prime_UTR,CDS;	AT3G24542:three_prime_UTR,CDS;	-0.190031	-0.155367	hypo	hypo	no	no	CHH-gene
Chr2	2228825	2229175	2228437	2229175	AT2TE10310:transposable_element;AT2TE10315:transposable_element;AT2TE10320:transposable_element;	AT2TE10310:transposable_element;AT2TE10315:transposable_element;AT2TE10320:transposable_element;	-0.267921	-0.354232	hypo	hypo	no	no	n/a
Chr1	29312579	29312821	29312579	29312821	AT1G77960:CDS;	AT1G77960:CDS;	-0.201553	-0.256197	hypo	hypo	no	no	UM
Chr3	8684547	8684772	8684384	8684772	AT3TE36400:transposable_element;	AT3TE36400:transposable_element;	-0.289277	-0.275938	hypo	hypo	no	no	n/a
Chr1	16444384	16444699	16444384	16444699	AT1G43650:three_prime_UTR,CDS;	AT1G43650:three_prime_UTR,CDS;	-0.392333	-0.364284	hypo	hypo	no	no	UM
Chr4	2596754	2596869	2596754	2597030	Intergenic	AT4TE12170:transposable_element;AT4TE12175:transposable_element;	-0.312791	-0.289788	hypo	hypo	no	no	n/a
Chr3	557853	557949	557853	557949	Intergenic	Intergenic	-0.364999	-0.321348	hypo	hypo	no	no	n/a
Chr5	15981659	15982149	15981659	15982149	AT5G39910:CDS;	AT5G39910:CDS;	-0.262535	-0.325312	hypo	hypo	no	no	UM
Chr3	7605154	7605505	7605155	7605377	AT3G21590:CDS;	AT3G21590:CDS;	-0.236721	-0.260909	hypo	hypo	no	no	UM
Chr3	10378556	10378691	10378556	10378805	AT3G27950:CDS;	AT3G27950:CDS;	-0.164694	-0.20739	hypo	hypo	no	no	CG-gbm
Chr3	3313135	3313270	3313135	3313270	Intergenic	Intergenic	-0.250236	-0.424015	hypo	hypo	no	no	n/a
Chr5	5609877	5610356	5609877	5610356	AT5TE20310:transposable_element;AT5TE20315:transposable_element;AT5TE20320:transposable_element;	AT5TE20310:transposable_element;AT5TE20315:transposable_element;AT5TE20320:transposable_element;	-0.184761	-0.379802	hypo	hypo	no	no	n/a
Chr2	1360893	1361144	1360893	1360955	AT2TE06205:transposable_element;	AT2TE06205:transposable_element;	-0.372564	-0.268483	hypo	hypo	no	no	n/a
Chr3	3527180	3527468	3527156	3527502	Intergenic	Intergenic	-0.310891	-0.406693	hypo	hypo	no	no	n/a
Chr2	11823193	11823657	11823238	11823657	AT2G27740:three_prime_UTR,CDS;	AT2G27740:three_prime_UTR,CDS;	-0.187214	-0.189521	hypo	hypo	no	no	UM
Chr4	7193581	7193834	7193581	7193845	AT4G12000:CDS;	AT4G12000:CDS;	-0.268964	-0.229476	hypo	hypo	no	no	UM
Chr3	9861370	9861878	9861370	9861981	AT3TE41060:transposable_element;AT3TE41065:transposable_element;	AT3TE41060:transposable_element;AT3TE41065:transposable_element;	-0.146448	-0.176762	hypo	hypo	no	no	n/a
Chr3	8211240	8211615	8211240	8211439	Intergenic	Intergenic	-0.178343	-0.157531	hypo	hypo	no	no	n/a
Chr1	17712809	17713064	17712809	17713170	Intergenic	Intergenic	-0.281964	-0.223764	hypo	hypo	no	no	n/a
Chr1	20924193	20924253	20924193	20924237	AT1G55940:CDS;	AT1G55940:CDS;	-0.423339	-0.296276	hypo	hypo	no	no	UM
Chr5	14921285	14921801	14921285	14921839	Intergenic	Intergenic	-0.212857	-0.335867	hypo	hypo	no	no	n/a
Chr5	26289357	26289709	26289357	26289709	Intergenic	Intergenic	-0.208209	-0.232575	hypo	hypo	no	no	n/a
Chr1	2217325	2217683	2217435	2217796	AT1G07220:CDS;	AT1G07220:CDS;	-0.167889	-0.199654	hypo	hypo	no	no	UM
Chr3	3743323	3743591	3743323	3743673	AT3TE15755:transposable_element;AT3TE15760:transposable_element;AT3TE15765:transposable_element;	AT3TE15755:transposable_element;AT3TE15760:transposable_element;AT3TE15765:transposable_element;	-0.142996	-0.185537	hypo	hypo	no	no	n/a
Chr1	18203128	18203726	18203128	18203726	Intergenic	Intergenic	-0.160085	-0.168115	hypo	hypo	no	no	n/a
Chr2	10944262	10944471	10944262	10944470	Intergenic	Intergenic	-0.218519	-0.331	hypo	hypo	no	no	n/a
Chr3	2862876	2863162	2862940	2863033	AT3G09320:CDS;	AT3G09320:CDS;	-0.258612	-0.192071	hypo	hypo	no	no	UM
Chr3	17147172	17147448	17147239	17147597	AT3TE69475:transposable_element;	AT3TE69475:transposable_element;AT3TE69480:transposable_element;AT3TE69485:transposable_element;AT3TE69490:transposable_element;	-0.220582	-0.284779	hypo	hypo	no	no	n/a
Chr4	16206159	16206485	16206159	16206578	AT4G33790:CDS;	AT4G33790:CDS;	-0.199849	-0.213491	hypo	hypo	no	no	UM
Chr5	18827442	18827761	18827657	18827761	AT5G46410:CDS;	AT5G46410:CDS;	-0.1684	-0.118308	hypo	hypo	no	no	CG-gbm
Chr5	1040352	1040602	1040572	1040769	AT5G03880:CDS;	AT5G03880:CDS;	-0.208259	-0.145014	hypo	hypo	no	no	UM
Chr5	8290337	8290571	8290337	8290614	Intergenic	Intergenic	-0.217065	-0.278705	hypo	hypo	no	no	n/a
Chr2	9703304	9703560	9703304	9703560	Intergenic	Intergenic	-0.222103	-0.192693	hypo	hypo	no	no	n/a
Chr3	7320810	7321140	7320810	7321140	AT3G20890:CDS;	AT3G20890:CDS;	-0.140472	-0.143497	hypo	hypo	no	no	UM
Chr4	782436	782598	782215	782554	AT4G01820:CDS;	AT4G01820:CDS;	-0.120252	-0.118876	hypo	hypo	yes	no	UM
Chr1	30366860	30367082	30366860	30367082	AT1G80810:CDS;	AT1G80810:CDS;	-0.226713	-0.221276	hypo	hypo	no	no	UM
Chr5	16196647	16196907	16196519	16196907	AT5TE58535:transposable_element;	AT5TE58535:transposable_element;	-0.189166	-0.243309	hypo	hypo	no	no	n/a
Chr4	8404339	8404815	8404339	8404753	Intergenic	Intergenic	-0.139645	-0.157673	hypo	hypo	no	no	n/a
Chr3	17774292	17774466	17774244	17774466	AT3G48120:CDS;	AT3G48120:CDS;	-0.160289	-0.171129	hypo	hypo	no	no	UM
Chr1	47947	48094	47947	48094	AT1G01090:CDS;	AT1G01090:CDS;	-0.26434	-0.319	hypo	hypo	no	no	UM
Chr1	25474416	25474578	25474520	25474578	AT1G67930:CDS;	AT1G67930:CDS;	-0.129966	-0.108357	hypo	hypo	no	no	CG-gbm
Chr3	6246952	6247088	6246952	6247088	AT3TE26260:transposable_element;	AT3TE26260:transposable_element;	-0.185426	-0.180985	hypo	hypo	no	no	n/a
Chr1	11750522	11750672	11750522	11750672	AT1G32500:CDS;	AT1G32500:CDS;	-0.27601	-0.241042	hypo	hypo	no	yes	UM
Chr3	8736957	8737422	8736957	8737422	AT3G24180:CDS;	AT3G24180:CDS;	-0.106376	-0.122983	hypo	hypo	no	no	CG-gbm
Chr5	4659519	4659816	4659519	4659661	AT5G14450:CDS;	AT5G14450:CDS;	-0.152143	-0.122552	hypo	hypo	no	no	UM
Chr3	5022227	5022548	5022158	5022479	AT3G14930:CDS;	AT3G14930:CDS;	-0.129113	-0.123837	hypo	hypo	no	no	UM
Chr4	9767159	9767387	9767159	9767376	AT4G17510:CDS;	AT4G17510:CDS;	-0.137664	-0.166724	hypo	hypo	no	yes	UM
Chr1	27957533	27957747	27957463	27957747	AT1G74360:CDS;	AT1G74360:CDS;	-0.22165	-0.254545	hypo	hypo	no	yes	UM
Chr2	7549145	7549278	7548999	7549278	Intergenic	Intergenic	-0.268803	-0.35068	hypo	hypo	no	no	n/a
Chr1	12695287	12695477	12695287	12695477	AT1G34650:CDS;AT1TE41400:transposable_element;	AT1G34650:CDS;AT1TE41400:transposable_element;	-0.179391	-0.260975	hypo	hypo	no	no	UM
Chr5	15226729	15226977	15226811	15226874	Intergenic	Intergenic	-0.268444	-0.290798	hypo	hypo	no	no	n/a
Chr3	23219211	23219524	23219355	23219524	AT3G62770:CDS;	AT3G62770:CDS;	-0.146479	-0.133144	hypo	hypo	no	no	UM
Chr1	18047894	18048243	18047894	18048345	Intergenic	Intergenic	-0.164151	-0.221138	hypo	hypo	no	no	n/a
Chr3	5793300	5793539	5793300	5793574	AT3TE24355:transposable_element;AT3TE24360:transposable_element;	AT3TE24355:transposable_element;AT3TE24360:transposable_element;	-0.152965	-0.255064	hypo	hypo	no	no	n/a
Chr2	14709532	14709626	14709394	14709626	AT2G34860:CDS;	AT2G34860:CDS;	-0.298739	-0.286048	hypo	hypo	no	no	UM
Chr5	10613379	10613587	10613379	10613587	Intergenic	Intergenic	-0.171694	-0.271229	hypo	hypo	no	no	n/a
Chr1	1790931	1791191	1790889	1791191	AT1G05910:CDS;	AT1G05910:CDS;	-0.115499	-0.116964	hypo	hypo	no	no	CG-gbm
Chr4	6644049	6644169	6644049	6644169	AT4G10800:CDS;	AT4G10800:CDS;	-0.327066	-0.258489	hypo	hypo	no	no	UM
Chr1	5512804	5513032	5512730	5512971	AT1G16070:CDS;	AT1G16070:CDS;	-0.145956	-0.158548	hypo	hypo	no	yes	UM
Chr5	14256167	14256443	14256167	14256443	AT5G36223:transposable_element_gene;	AT5G36223:transposable_element_gene;	-0.172615	-0.141199	hypo	hypo	no	no	n/a
Chr2	3386946	3387175	3386946	3387128	AT2G07708:five_prime_UTR;	AT2G07708:five_prime_UTR;	-0.253374	-0.113234	hypo	hypo	no	no	UM
Chr3	8026245	8026471	8026245	8026471	AT3G22710:CDS;	AT3G22710:CDS;	-0.125884	-0.142176	hypo	hypo	no	yes	CHH-gene
Chr1	21137757	21137907	21137724	21137959	AT1G56430:CDS;	AT1G56430:CDS;	-0.180097	-0.265721	hypo	hypo	no	yes	UM
Chr1	5866669	5866808	5866669	5866880	AT1G17150:CDS;	AT1G17150:CDS;	-0.221004	-0.221412	hypo	hypo	no	no	UM
Chr3	16935467	16935631	16935467	16935671	Intergenic	Intergenic	-0.239594	-0.273971	hypo	hypo	no	no	n/a
Chr1	9812139	9812332	9812139	9812332	Intergenic	Intergenic	-0.335025	-0.318344	hypo	hypo	no	no	n/a
Chr1	12963614	12964049	12963907	12964049	AT1TE42265:transposable_element;AT1TE42270:transposable_element;	AT1TE42270:transposable_element;	-0.238234	-0.184326	hypo	hypo	no	no	n/a
Chr3	15745433	15745775	15745523	15745659	AT3TE63640:transposable_element;	AT3TE63640:transposable_element;	-0.209444	-0.120836	hypo	hypo	no	no	n/a
Chr3	9773823	9774234	9773823	9774344	AT3TE40690:transposable_element;AT3TE40695:transposable_element;	AT3TE40690:transposable_element;AT3TE40695:transposable_element;	-0.232097	-0.260863	hypo	hypo	no	no	n/a
Chr2	11963929	11964405	11963929	11964794	AT2TE52075:transposable_element;AT2TE52080:transposable_element;	AT2TE52075:transposable_element;AT2TE52080:transposable_element;AT2TE52085:transposable_element;	-0.225031	-0.257682	hypo	hypo	no	yes	n/a
Chr1	21998223	21998419	21998196	21998373	Intergenic	Intergenic	-0.123738	-0.125881	hypo	hypo	no	no	n/a
Chr4	5580991	5581282	5580921	5581282	AT4G08750:transposable_element_gene;	AT4G08750:transposable_element_gene;	-0.204145	-0.30576	hypo	hypo	no	no	n/a
Chr2	9907343	9907475	9907407	9907475	Intergenic	Intergenic	-0.26557	-0.219342	hypo	hypo	no	no	n/a
Chr2	15239468	15239685	15239468	15239784	AT2G36350:CDS;	AT2G36350:CDS;	-0.217046	-0.218185	hypo	hypo	no	no	CG-gbm
Chr3	5835485	5835631	5835434	5835631	Intergenic	Intergenic	-0.233515	-0.327527	hypo	hypo	no	no	n/a
Chr1	9867140	9867589	9866985	9867494	AT1TE31775:transposable_element;AT1TE31780:transposable_element;AT1TE31785:transposable_element;AT1TE31790:transposable_element;	AT1TE31775:transposable_element;AT1TE31780:transposable_element;AT1TE31785:transposable_element;AT1TE31790:transposable_element;	-0.227667	-0.244788	hypo	hypo	no	yes	n/a
Chr1	5050478	5050855	5050588	5050855	AT1G14688:CDS;	AT1G14688:CDS;	-0.216003	-0.223101	hypo	hypo	no	yes	UM
Chr1	8056915	8057107	8056925	8057085	AT1G22760:CDS;	AT1G22760:CDS;	-0.162244	-0.159472	hypo	hypo	no	no	UM
Chr1	20358606	20358851	20358567	20358930	AT1G54510:CDS;	AT1G54510:three_prime_UTR,CDS;	-0.106734	-0.129914	hypo	hypo	no	no	CG-gbm
Chr3	9970800	9970968	9970454	9970804	AT3G27025:CDS;	AT3G27025:CDS;	-0.138186	-0.126727	hypo	hypo	no	yes	UM
Chr5	20957305	20957503	20957381	20957503	AT5G51590:CDS;	AT5G51590:CDS;	-0.189435	-0.243508	hypo	hypo	no	yes	UM
Chr1	26425659	26425894	26425599	26425916	Intergenic	Intergenic	-0.193599	-0.213144	hypo	hypo	no	no	n/a
Chr1	21127192	21127569	21127192	21127569	AT1TE69830:transposable_element;	AT1TE69830:transposable_element;	-0.306631	-0.470289	hypo	hypo	no	no	n/a
Chr2	9860574	9860912	9860574	9860812	AT2TE42175:transposable_element;	AT2TE42175:transposable_element;	-0.432123	-0.285972	hypo	hypo	no	no	n/a
Chr1	15393302	15393538	15393302	15393538	AT1G40118:transposable_element_gene;AT1TE50795:transposable_element;AT1TE50800:transposable_element;	AT1G40118:transposable_element_gene;AT1TE50795:transposable_element;AT1TE50800:transposable_element;	-0.228841	-0.204991	hypo	hypo	no	no	n/a
Chr5	16676795	16677099	16676911	16677100	AT5G41700:three_prime_UTR,CDS;	AT5G41700:three_prime_UTR,CDS;	-0.203976	-0.187023	hypo	hypo	no	no	UM
Chr5	25151204	25151322	25151204	25151322	AT5G62640:CDS;	AT5G62640:CDS;	-0.17076	-0.174272	hypo	hypo	yes	yes	CG-gbm
Chr3	10296703	10297185	10296703	10297185	AT3TE42795:transposable_element;	AT3TE42795:transposable_element;	-0.277416	-0.35676	hypo	hypo	no	yes	n/a
Chr3	11915965	11916307	11916198	11916562	AT3G30281:pseudogene;	AT3G30281:pseudogene;	-0.150644	-0.150625	hypo	hypo	no	no	n/a
Chr2	13807935	13808164	13807935	13808164	Intergenic	Intergenic	-0.213835	-0.250395	hypo	hypo	no	no	n/a
Chr1	20840049	20840326	20840072	20840348	AT1G55750:three_prime_UTR;	AT1G55750:three_prime_UTR;	-0.149841	-0.15595	hypo	hypo	no	no	CG-gbm
Chr5	7161856	7161989	7161856	7161989	AT5G21080:CDS;	AT5G21080:CDS;	-0.417468	-0.468919	hypo	hypo	no	no	UM
Chr4	16903384	16903470	16903384	16903652	AT4G35620:CDS;	AT4G35620:CDS;	-0.176512	-0.196269	hypo	hypo	no	no	UM
Chr5	7300159	7300414	7300117	7300414	AT5G22044:pseudogene;AT5TE26395:transposable_element;	AT5G22044:pseudogene;AT5TE26395:transposable_element;	-0.258459	-0.303946	hypo	hypo	no	yes	n/a
Chr5	19169307	19169400	19169307	19169400	AT5G47210:three_prime_UTR,CDS;	AT5G47210:three_prime_UTR,CDS;	-0.220603	-0.267666	hypo	hypo	no	no	UM
Chr4	2335685	2335830	2335515	2335958	Intergenic	Intergenic	-0.270203	-0.309113	hypo	hypo	no	yes	n/a
Chr4	16369792	16370085	16369792	16370097	AT4G34180:three_prime_UTR,CDS;	AT4G34180:three_prime_UTR,CDS;	-0.254676	-0.205207	hypo	hypo	no	no	UM
Chr5	25857607	25857867	25857607	25857725	Intergenic	Intergenic	-0.13691	-0.11777	hypo	hypo	no	no	n/a
Chr1	3074425	3075004	3074119	3075004	AT1TE09970:transposable_element;	AT1TE09970:transposable_element;	-0.222273	-0.328091	hypo	hypo	no	no	n/a
Chr1	29151437	29151601	29151364	29151601	AT1G77590:CDS;	AT1G77590:CDS;	-0.128392	-0.149612	hypo	hypo	yes	yes	CG-gbm
Chr1	25343811	25343895	25343677	25343929	AT1G67626:transposable_element_gene;AT1TE83175:transposable_element;	AT1G67626:transposable_element_gene;AT1TE83175:transposable_element;	-0.158188	-0.30882	hypo	hypo	no	yes	n/a
Chr1	13204659	13205205	13204762	13204942	AT1TE43115:transposable_element;	AT1TE43115:transposable_element;	-0.150232	-0.152035	hypo	hypo	no	no	n/a
Chr2	8545951	8546231	8545868	8546322	AT2G19806:transposable_element_gene;AT2TE35770:transposable_element;	AT2G19806:transposable_element_gene;AT2TE35770:transposable_element;	-0.256217	-0.336788	hypo	hypo	no	no	n/a
Chr1	25484754	25485120	25484772	25485120	AT1G67970:three_prime_UTR,CDS;	AT1G67970:three_prime_UTR,CDS;	-0.191502	-0.162911	hypo	hypo	no	no	UM
Chr1	11788332	11788527	11788468	11788498	AT1G32585:CDS;	Intergenic	-0.344114	-0.21222	hypo	hypo	no	no	UM
Chr1	22294786	22294882	22294786	22294848	AT1G60505:ncRNA;AT1G60510:pseudogene;	AT1G60505:ncRNA;AT1G60510:pseudogene;	-0.13896	-0.139589	hypo	hypo	yes	no	n/a
Chr1	10123689	10124052	10123798	10123820	AT1TE32655:transposable_element;	AT1TE32655:transposable_element;	-0.337773	-0.192312	hypo	hypo	no	no	n/a
Chr5	582079	582214	582098	582214	Intergenic	Intergenic	-0.176518	-0.176694	hypo	hypo	no	no	n/a
Chr4	8393483	8393653	8393536	8393740	AT4G14630:CDS;	AT4G14630:three_prime_UTR,CDS;AT4TE37230:transposable_element;	-0.282621	-0.217645	hypo	hypo	yes	no	CHH-gene
Chr3	23379139	23379440	23379139	23379440	AT3G63280:CDS;	AT3G63280:CDS;	-0.172943	-0.342222	hypo	hypo	no	no	UM
Chr3	15371579	15371895	15371707	15371895	AT3TE62415:transposable_element;	AT3TE62415:transposable_element;	-0.161557	-0.149549	hypo	hypo	no	no	n/a
Chr1	2868764	2869039	2868938	2869003	AT1G08920:CDS;	AT1G08920:CDS;	-0.201828	-0.168166	hypo	hypo	no	no	UM
Chr1	6186542	6186756	6186542	6186735	AT1G17970:CDS;	AT1G17970:CDS;	-0.242801	-0.214636	hypo	hypo	no	yes	UM
Chr5	21738605	21738872	21738605	21738872	AT5G53510:CDS;	AT5G53510:CDS;	-0.265891	-0.372136	hypo	hypo	no	no	UM
Chr1	23247270	23247565	23247541	23247565	AT1TE76630:transposable_element;	AT1TE76630:transposable_element;	-0.263693	-0.110641	hypo	hypo	no	no	n/a
Chr1	25511746	25512009	25511837	25512009	AT1G68060:CDS;	AT1G68060:CDS;	-0.175157	-0.166377	hypo	hypo	no	no	CG-gbm
Chr1	1706412	1706562	1706412	1706562	AT1TE05585:transposable_element;	AT1TE05585:transposable_element;	-0.159364	-0.172027	hypo	hypo	no	no	n/a
Chr1	12882731	12883182	12882731	12883355	Intergenic	Intergenic	-0.239443	-0.323078	hypo	hypo	no	no	n/a
Chr5	26314819	26315072	26314895	26315011	AT5G65770:CDS;AT5G65780:CDS;	AT5G65770:CDS;AT5G65780:CDS;	-0.142759	-0.126322	hypo	hypo	no	no	UM
Chr2	6579833	6580537	6579833	6580313	AT2G15160:transposable_element_gene;AT2TE26865:transposable_element;AT2TE26875:transposable_element;	AT2G15160:transposable_element_gene;AT2TE26865:transposable_element;AT2TE26875:transposable_element;	-0.183914	-0.222702	hypo	hypo	no	no	n/a
Chr3	3416464	3416693	3416367	3416878	AT3G10915:three_prime_UTR,CDS;	AT3G10915:three_prime_UTR,CDS;	-0.125232	-0.137579	hypo	hypo	no	no	UM
Chr1	6532157	6532302	6532187	6532302	AT1G18900:CDS;	AT1G18900:CDS;	-0.1131	-0.107696	hypo	hypo	no	no	CG-gbm
Chr4	7720561	7720795	7720561	7720795	Intergenic	Intergenic	-0.215659	-0.235666	hypo	hypo	no	no	n/a
Chr1	1853452	1853556	1853411	1853668	AT1G06110:CDS;	AT1G06110:CDS;	-0.192114	-0.209714	hypo	hypo	no	yes	UM
Chr1	9292264	9292415	9292264	9292415	Intergenic	Intergenic	-0.237363	-0.285972	hypo	hypo	no	no	n/a
Chr2	333795	333979	333661	333979	AT2G01760:CDS;	AT2G01760:CDS;	-0.138972	-0.162497	hypo	hypo	no	no	UM
Chr4	11236108	11236270	11236108	11236270	Intergenic	Intergenic	-0.192578	-0.274295	hypo	hypo	no	no	n/a
Chr1	23216822	23216924	23216844	23216924	AT1G62700:CDS;	AT1G62700:CDS;	-0.200102	-0.188634	hypo	hypo	no	no	UM
Chr4	18251581	18251794	18251581	18251713	AT4TE88425:transposable_element;AT4TE88430:transposable_element;	AT4TE88425:transposable_element;AT4TE88430:transposable_element;	-0.216807	-0.126643	hypo	hypo	no	no	n/a
Chr2	19552548	19552722	19552507	19552784	AT2G47700:CDS;	AT2G47700:CDS;	-0.133084	-0.140388	hypo	hypo	no	yes	UM
Chr2	18317682	18317909	18317766	18317909	AT2G44350:CDS;	AT2G44350:CDS;	-0.182135	-0.238557	hypo	hypo	no	yes	UM
Chr4	7166408	7166557	7166344	7166557	Intergenic	Intergenic	-0.181623	-0.403979	hypo	hypo	no	no	n/a
Chr2	9432595	9432645	9432595	9432786	Intergenic	AT2TE40090:transposable_element;	-0.250999	-0.272339	hypo	hypo	no	no	n/a
Chr1	21719736	21719870	21719706	21719931	Intergenic	Intergenic	-0.145707	-0.261253	hypo	hypo	no	no	n/a
Chr3	17275757	17275878	17275757	17275867	AT3TE70035:transposable_element;	AT3TE70035:transposable_element;	-0.21006	-0.199682	hypo	hypo	no	no	n/a
Chr5	22235079	22235343	22235046	22235343	AT5G54730:CDS;	AT5G54730:CDS;	-0.116741	-0.141028	hypo	hypo	no	no	UM
Chr3	20817535	20817640	20817535	20817640	AT3G56100:CDS;	AT3G56100:CDS;	-0.328566	-0.323645	hypo	hypo	no	no	UM
Chr3	19219308	19219743	19219434	19219517	AT3TE77985:transposable_element;	AT3TE77985:transposable_element;	-0.158429	-0.122779	hypo	hypo	no	no	n/a
Chr5	9289267	9289576	9289267	9289576	AT5TE33595:transposable_element;	AT5TE33595:transposable_element;	-0.307423	-0.319965	hypo	hypo	no	yes	n/a
Chr5	6751315	6751465	6751315	6751492	Intergenic	Intergenic	-0.110056	-0.103808	hypo	hypo	no	no	n/a
Chr2	7745235	7745616	7745235	7745560	AT2G17820:CDS;	AT2G17820:CDS;	-0.151336	-0.160837	hypo	hypo	no	no	CG-gbm
Chr1	3407090	3407337	3407036	3407492	AT1G10390:three_prime_UTR,CDS;	AT1G10390:three_prime_UTR,CDS;	-0.120179	-0.15907	hypo	hypo	no	no	CG-gbm
Chr1	20347460	20347603	20347586	20347603	AT1G54470:three_prime_UTR,CDS;	AT1G54470:three_prime_UTR,CDS;	-0.120555	-0.144964	hypo	hypo	no	no	UM
Chr3	3685759	3685989	3685796	3685912	Intergenic	Intergenic	-0.129262	-0.116732	hypo	hypo	no	no	n/a
Chr3	10980726	10980857	10980708	10980857	AT3G28956:three_prime_UTR,CDS;AT3TE45640:transposable_element;	AT3G28956:three_prime_UTR,CDS;AT3TE45640:transposable_element;	-0.162021	-0.230075	hypo	hypo	no	no	UM
Chr3	5828183	5828422	5828421	5828598	AT3G17090:CDS;	AT3G17090:CDS;	-0.265518	-0.205145	hypo	hypo	no	no	UM
Chr3	6409449	6409601	6409449	6409520	AT3G18620:CDS;	AT3G18620:CDS;	-0.169891	-0.190841	hypo	hypo	no	no	UM
Chr4	9757159	9757300	9757159	9757300	Intergenic	Intergenic	-0.336855	-0.349676	hypo	hypo	no	no	n/a
Chr5	16436966	16437134	16436966	16437134	AT5G41060:CDS;	AT5G41060:CDS;	-0.152977	-0.161049	hypo	hypo	no	no	UM
Chr5	23725946	23726038	23725946	23726068	AT5G58740:CDS;	AT5G58740:CDS;	-0.135279	-0.160075	hypo	hypo	no	no	UM
Chr4	11255749	11255943	11255749	11256043	Intergenic	Intergenic	-0.208068	-0.162067	hypo	hypo	no	no	n/a
Chr1	3040385	3040601	3040385	3040673	AT1G09420:CDS;	AT1G09420:CDS;	-0.167548	-0.224582	hypo	hypo	no	no	UM
Chr1	11452803	11453002	11452596	11452881	AT1TE37050:transposable_element;	AT1TE37050:transposable_element;	-0.153245	-0.165678	hypo	hypo	no	no	n/a
Chr4	5793891	5794055	5793982	5794077	AT4TE24340:transposable_element;	AT4TE24340:transposable_element;	-0.173658	-0.205355	hypo	hypo	no	no	n/a
Chr5	5808835	5808948	5808857	5808948	Intergenic	Intergenic	-0.242387	-0.251378	hypo	hypo	no	no	n/a
Chr3	7342239	7342471	7342239	7342471	AT3TE30860:transposable_element;	AT3TE30860:transposable_element;	-0.167365	-0.158719	hypo	hypo	no	no	n/a
Chr4	16761788	16761850	16761788	16761850	AT4G35240:CDS;	AT4G35240:CDS;	-0.3088	-0.457773	hypo	hypo	no	no	UM
Chr5	23284578	23284752	23284578	23284752	AT5G57490:CDS;	AT5G57490:CDS;	-0.133181	-0.160753	hypo	hypo	no	no	UM
Chr1	4128068	4128364	4128033	4128364	AT1G12160:three_prime_UTR,CDS;	AT1G12160:three_prime_UTR,CDS;	-0.314066	-0.372362	hypo	hypo	no	yes	UM
Chr1	19345713	19345790	19345713	19345763	Intergenic	Intergenic	-0.208019	-0.123954	hypo	hypo	no	no	n/a
Chr3	18327278	18327447	18327119	18327460	AT3G49410:CDS;	AT3G49410:CDS;	-0.142056	-0.157585	hypo	hypo	no	no	CG-gbm
Chr3	15501235	15501398	15501192	15501398	Intergenic	Intergenic	-0.135389	-0.174996	hypo	hypo	no	no	n/a
Chr1	15945381	15945662	15945194	15945662	AT1TE52550:transposable_element;	AT1TE52550:transposable_element;	-0.186961	-0.191775	hypo	hypo	no	no	n/a
Chr5	5513382	5513466	5513382	5513466	Intergenic	Intergenic	-0.284523	-0.231844	hypo	hypo	no	no	n/a
Chr1	19192703	19192889	19192753	19192937	AT1G51745:CDS;	AT1G51745:CDS;	-0.17882	-0.161583	hypo	hypo	no	no	CG-gbm
Chr5	4492549	4492804	4492549	4492804	AT5G13940:CDS;	AT5G13940:CDS;	-0.269771	-0.257669	hypo	hypo	no	no	UM
Chr1	13749285	13749676	13749393	13749676	AT1TE45060:transposable_element;	AT1TE45060:transposable_element;	-0.151829	-0.157477	hypo	hypo	no	no	n/a
Chr1	3691505	3691556	3691266	3691556	AT1G11070:CDS;	AT1G11070:CDS;	-0.150986	-0.178836	hypo	hypo	no	no	UM
Chr3	6816356	6816444	6816356	6816444	AT3G19620:CDS;	AT3G19620:CDS;	-0.133982	-0.156653	hypo	hypo	no	no	UM
Chr1	7001489	7001605	7001489	7001642	AT1G20200:CDS;	AT1G20200:CDS;	-0.165424	-0.203053	hypo	hypo	no	no	CG-gbm
Chr5	15961567	15961835	15961507	15961689	AT5G39862:transposable_element_gene;AT5TE57635:transposable_element;	AT5G39862:transposable_element_gene;AT5TE57635:transposable_element;	-0.132045	-0.138801	hypo	hypo	no	no	n/a
Chr1	26198210	26198296	26198210	26198296	AT1G69650:CDS;	AT1G69650:CDS;	-0.195498	-0.208314	hypo	hypo	no	no	UM
Chr3	4491184	4491267	4491025	4491421	AT3G13700:CDS;AT3G13710:three_prime_UTR;	AT3G13700:CDS;AT3G13710:three_prime_UTR;	-0.196035	-0.262765	hypo	hypo	no	yes	UM
Chr1	5769956	5770127	5769884	5770177	AT1G16858:three_prime_UTR;AT1G16860:CDS;	AT1G16858:three_prime_UTR;AT1G16860:CDS;	-0.176679	-0.192963	hypo	hypo	no	yes	UM
Chr1	29274359	29274469	29274342	29274541	AT1G77850:CDS;	AT1G77850:CDS;	-0.2788	-0.229576	hypo	hypo	no	no	UM
Chr4	7157459	7157623	7157459	7157654	AT4G11910:CDS;	AT4G11910:CDS;	-0.166121	-0.19616	hypo	hypo	no	no	UM
Chr2	12720313	12720528	12720313	12720528	AT2TE55600:transposable_element;	AT2TE55600:transposable_element;	-0.305992	-0.20401	hypo	hypo	no	no	n/a
Chr3	3979425	3979683	3979425	3979683	AT3G12550:CDS;	AT3G12550:CDS;	-0.116122	-0.136243	hypo	hypo	yes	no	UM
Chr2	872717	872878	872717	872878	AT2TE03875:transposable_element;	AT2TE03875:transposable_element;	-0.189899	-0.17387	hypo	hypo	no	no	n/a
Chr1	24563651	24563957	24563651	24563776	AT1G65985:CDS;AT1TE80680:transposable_element;	AT1G65985:CDS;AT1TE80680:transposable_element;	-0.170632	-0.108474	hypo	hypo	no	no	UM
Chr1	25831607	25831874	25831727	25831874	AT1G68780:three_prime_UTR;	AT1G68780:three_prime_UTR;	-0.17522	-0.129253	hypo	hypo	no	no	UM
Chr4	6863553	6863664	6863501	6863592	Intergenic	Intergenic	-0.222442	-0.214556	hypo	hypo	no	no	n/a
Chr1	10390222	10390403	10390222	10390403	AT1G29715:pseudogene;	AT1G29715:pseudogene;	-0.126916	-0.14902	hypo	hypo	no	no	n/a
Chr1	12711446	12711628	12711446	12711628	AT1G34680:pseudogene;	AT1G34680:pseudogene;	-0.193372	-0.161541	hypo	hypo	no	no	n/a
Chr3	11032437	11032609	11032349	11032609	AT3TE45865:transposable_element;	AT3TE45865:transposable_element;	-0.171079	-0.19604	hypo	hypo	no	no	n/a
Chr4	617608	617707	617634	617707	AT4TE03220:transposable_element;	AT4TE03220:transposable_element;	-0.269738	-0.223283	hypo	hypo	no	no	n/a
Chr4	14712477	14712722	14712184	14712738	AT4TE69740:transposable_element;	AT4TE69740:transposable_element;	-0.299736	-0.361806	hypo	hypo	no	no	n/a
Chr3	3321822	3322057	3321962	3322057	AT3G10630:CDS;	AT3G10630:CDS;	-0.145272	-0.144878	hypo	hypo	no	no	UM
Chr2	18239970	18240121	18240077	18240121	AT2G44090:CDS;	AT2G44090:CDS;	-0.157479	-0.144367	hypo	hypo	no	no	CG-gbm
Chr5	19970693	19970826	19970732	19970826	AT5TE71900:transposable_element;	Intergenic	-0.199611	-0.218384	hypo	hypo	no	yes	n/a
Chr4	6909325	6909566	6909182	6909566	AT4TE29795:transposable_element;	AT4TE29795:transposable_element;	-0.337917	-0.35921	hypo	hypo	no	no	n/a
Chr3	7544811	7544912	7544811	7544882	AT3G21430:CDS;	AT3G21430:CDS;	-0.137843	-0.120993	hypo	hypo	no	no	CG-gbm
Chr1	23000622	23000788	23000559	23000828	AT1G62262:CDS;	AT1G62262:CDS;	-0.104014	-0.162789	hypo	hypo	yes	no	UM
Chr5	22181714	22181773	22181714	22181773	AT5G54590:CDS;	AT5G54590:CDS;	-0.167494	-0.172005	hypo	hypo	no	yes	UM
Chr3	17242020	17242071	17242020	17242178	AT3G46820:three_prime_UTR;	AT3G46820:three_prime_UTR;	-0.211043	-0.206329	hypo	hypo	no	no	CG-gbm
Chr5	19145805	19145901	19145805	19145901	AT5G47140:CDS;	AT5G47140:CDS;	-0.119547	-0.148499	hypo	hypo	no	no	UM
Chr3	21778847	21779033	21778741	21779097	AT3G58930:CDS;	AT3G58930:CDS;	-0.10891	-0.122045	hypo	hypo	no	no	UM
Chr5	19746492	19746514	19746492	19746514	Intergenic	Intergenic	-0.185903	-0.122089	hypo	hypo	no	no	n/a
Chr2	7856134	7856270	7856080	7856135	Intergenic	Intergenic	-0.143741	-0.131137	hypo	hypo	no	no	n/a
Chr1	603986	604152	603897	604038	AT1G02750:three_prime_UTR,CDS;	AT1G02750:CDS;	-0.104597	-0.160249	hypo	hypo	no	no	UM
Chr2	7367671	7367758	7367671	7367758	AT2G16960:CDS;	AT2G16960:CDS;	-0.233008	-0.239349	hypo	hypo	no	no	UM
Chr2	17022739	17022889	17022739	17022889	AT2G40780:three_prime_UTR,CDS;	AT2G40780:three_prime_UTR,CDS;	-0.301789	-0.299113	hypo	hypo	no	no	UM
Chr2	11623789	11624195	11623789	11624195	AT2TE50465:transposable_element;AT2TE50470:transposable_element;	AT2TE50465:transposable_element;AT2TE50470:transposable_element;	-0.207016	-0.321893	hypo	hypo	no	no	n/a
Chr4	877056	877604	876961	877854	AT4G02005:ncRNA;	AT4G02005:ncRNA;	-0.139074	-0.173842	hypo	hypo	no	no	n/a
Chr1	23761332	23761461	23761332	23761572	AT1TE78225:transposable_element;	AT1TE78225:transposable_element;AT1TE78230:transposable_element;	-0.215453	-0.27632	hypo	hypo	no	no	n/a
Chr4	9124099	9124436	9123991	9124436	AT4G16130:CDS;	AT4G16130:CDS;	-0.136705	-0.21268	hypo	hypo	no	no	UM
Chr3	9335609	9335745	9335609	9335745	Intergenic	Intergenic	-0.207616	-0.21081	hypo	hypo	no	no	n/a
Chr5	8727779	8728163	8727779	8728163	AT5TE31570:transposable_element;	AT5TE31570:transposable_element;	-0.167345	-0.261754	hypo	hypo	no	no	n/a
Chr3	19014932	19015170	19014951	19015170	AT3G51180:CDS;	AT3G51180:CDS;	-0.117575	-0.103942	hypo	hypo	no	no	UM
Chr3	16126834	16127019	16126834	16127142	AT3G44540:CDS;	AT3G44540:CDS;	-0.184186	-0.219129	hypo	hypo	no	no	UM
Chr4	5319499	5319756	5319499	5319841	AT4G08395:CDS;	AT4G08395:CDS;	-0.188329	-0.22202	hypo	hypo	yes	no	CHH-gene
Chr4	6703607	6703715	6703607	6703688	AT4G10925:CDS;	AT4G10925:CDS;	-0.141708	-0.131892	hypo	hypo	no	no	UM
Chr5	13415500	13415804	13415500	13415805	AT5G35160:CDS;	AT5G35160:CDS;	-0.114646	-0.117704	hypo	hypo	no	no	CG-gbm
Chr3	16627331	16627918	16627331	16627921	AT3TE67415:transposable_element;	AT3TE67415:transposable_element;	-0.184314	-0.227815	hypo	hypo	no	no	n/a
Chr3	9296135	9296387	9296135	9296387	AT3G25585:five_prime_UTR,CDS;	AT3G25585:five_prime_UTR,CDS;	-0.18898	-0.170653	hypo	hypo	yes	no	CG-gbm
Chr1	5736178	5736345	5736143	5736345	AT1G16760:CDS;	AT1G16760:CDS;	-0.112797	-0.110085	hypo	hypo	no	no	UM
Chr5	5404380	5404454	5404380	5404493	AT5G16540:CDS;	AT5G16540:CDS;	-0.239621	-0.307177	hypo	hypo	no	no	UM
Chr4	9054665	9055029	9054796	9055035	AT4TE40615:transposable_element;AT4TE40620:transposable_element;	AT4TE40620:transposable_element;	-0.215833	-0.202264	hypo	hypo	no	no	n/a
Chr3	16006121	16006208	16006040	16006142	AT3TE64790:transposable_element;	AT3TE64790:transposable_element;	-0.120061	-0.147053	hypo	hypo	no	no	n/a
Chr1	5391523	5391592	5391523	5391580	AT1TE17415:transposable_element;	AT1TE17415:transposable_element;	-0.131296	-0.121194	hypo	hypo	no	no	n/a
Chr1	12185131	12185245	12184822	12185164	AT1TE39545:transposable_element;	AT1TE39545:transposable_element;	-0.302975	-0.205624	hypo	hypo	no	no	n/a
Chr4	16387487	16387603	16387487	16387603	AT4G34230:CDS;	AT4G34230:CDS;	-0.183559	-0.219331	hypo	hypo	no	no	UM
Chr2	18453171	18453273	18453171	18453333	AT2G44760:CDS;	AT2G44760:CDS;	-0.246062	-0.264449	hypo	hypo	no	no	UM
Chr1	17686498	17686598	17686498	17686702	AT1TE58725:transposable_element;	AT1TE58725:transposable_element;AT1TE58730:transposable_element;	-0.219608	-0.270249	hypo	hypo	no	no	n/a
Chr5	3079059	3079250	3079059	3079250	Intergenic	Intergenic	-0.33499	-0.232917	hypo	hypo	no	no	n/a
Chr5	23888718	23889024	23888933	23889163	AT5G59200:CDS;	AT5G59200:CDS;	-0.157817	-0.136501	hypo	hypo	no	no	UM
Chr5	1573315	1573488	1573257	1573465	AT5G05310:CDS;	AT5G05310:CDS;	-0.124955	-0.139851	hypo	hypo	no	no	UM
Chr4	9980977	9981058	9980977	9981058	Intergenic	Intergenic	-0.15704	-0.159063	hypo	hypo	no	no	n/a
Chr3	6935964	6936132	6935947	6936157	AT3G19930:CDS;	AT3G19930:CDS;	-0.211844	-0.220883	hypo	hypo	no	yes	UM
Chr3	22511399	22511566	22511399	22511566	AT3G60920:CDS;	AT3G60920:CDS;	-0.181764	-0.16384	hypo	hypo	no	no	UM
Chr1	24063724	24063826	24063724	24063878	Intergenic	Intergenic	-0.194957	-0.280063	hypo	hypo	no	yes	n/a
Chr3	21515125	21515315	21515082	21515358	AT3G58100:three_prime_UTR;	AT3G58100:three_prime_UTR;	-0.170928	-0.186824	hypo	hypo	no	no	UM
Chr5	16037532	16037733	16037532	16037733	AT5G40060:CDS;	AT5G40060:CDS;	-0.30898	-0.413906	hypo	hypo	no	no	UM
Chr5	9688804	9689075	9688804	9689075	AT5G27430:CDS;	AT5G27430:CDS;	-0.231544	-0.241057	hypo	hypo	no	no	UM
Chr5	3063831	3063889	3063831	3063889	AT5G09850:CDS;	AT5G09850:CDS;	-0.178847	-0.233229	hypo	hypo	no	no	UM
Chr5	3916538	3916621	3916529	3916792	AT5G12120:CDS;	AT5G12120:CDS;	-0.128364	-0.171476	hypo	hypo	no	no	CG-gbm
Chr3	6026834	6026973	6026722	6027121	AT3G17620:CDS;	AT3G17620:CDS;	-0.155351	-0.187866	hypo	hypo	yes	no	UM
Chr4	18418651	18418803	18418651	18418803	AT4G39690:CDS;	AT4G39690:CDS;	-0.136501	-0.126669	hypo	hypo	no	no	CG-gbm
Chr3	19365643	19365892	19365643	19365892	AT3G52200:CDS;	AT3G52200:CDS;	-0.302766	-0.382674	hypo	hypo	no	yes	UM
Chr5	558215	558393	558215	558393	AT5G02502:three_prime_UTR;	AT5G02502:three_prime_UTR;	-0.212249	-0.202648	hypo	hypo	no	no	UM
Chr3	1494	1592	1494	1592	Intergenic	Intergenic	-0.214888	-0.182345	hypo	hypo	no	no	n/a
Chr3	3664598	3664696	3664276	3664696	AT3TE15400:transposable_element;	AT3TE15400:transposable_element;	-0.19636	-0.341178	hypo	hypo	no	yes	n/a
Chr5	1053606	1053679	1053579	1053679	AT5G03905:CDS;	AT5G03905:CDS;	-0.213397	-0.331215	hypo	hypo	no	no	UM
Chr3	23029657	23029764	23029657	23029927	AT3G62220:CDS;	AT3G62220:CDS;	-0.113724	-0.188176	hypo	hypo	no	yes	UM
Chr4	1444122	1444213	1443813	1444213	AT4TE07365:transposable_element;	AT4TE07360:transposable_element;AT4TE07365:transposable_element;	-0.223817	-0.253846	hypo	hypo	no	no	n/a
Chr5	24229789	24230213	24229789	24230213	AT5G60170:CDS;	AT5G60170:CDS;	-0.190721	-0.204704	hypo	hypo	no	no	CG-gbm
Chr3	4686126	4686185	4686126	4686258	AT3G14130:CDS;	AT3G14130:CDS;	-0.15711	-0.198734	hypo	hypo	yes	yes	UM
Chr1	19246291	19246393	19246291	19246393	AT1TE63785:transposable_element;	AT1TE63785:transposable_element;	-0.215936	-0.543828	hypo	hypo	no	no	n/a
Chr1	20278780	20278983	20278655	20278983	AT1TE67005:transposable_element;AT1TE67010:transposable_element;	AT1TE67005:transposable_element;AT1TE67010:transposable_element;	-0.222982	-0.216789	hypo	hypo	no	no	n/a
Chr5	23034918	23035048	23034918	23035048	AT5G56950:CDS;	AT5G56950:CDS;	-0.219717	-0.258151	hypo	hypo	no	no	UM
Chr2	13577415	13577600	13577415	13577619	AT2G31930:five_prime_UTR,CDS;	AT2G31930:five_prime_UTR,CDS;	-0.177654	-0.173821	hypo	hypo	no	no	UM
Chr1	6587827	6588047	6587980	6588047	AT1TE21355:transposable_element;	AT1TE21355:transposable_element;	-0.112979	-0.101407	hypo	hypo	no	no	n/a
Chr1	25460118	25460227	25460148	25460227	AT1G67890:CDS;	AT1G67890:CDS;	-0.132128	-0.142512	hypo	hypo	no	no	UM
Chr1	2978146	2978310	2978010	2978363	AT1G09220:CDS;	AT1G09220:CDS;	-0.115619	-0.144494	hypo	hypo	no	no	UM
Chr3	19077062	19077235	19077110	19077235	AT3G51390:CDS;	AT3G51390:CDS;	-0.131006	-0.127324	hypo	hypo	no	no	UM
Chr2	7732157	7732320	7732041	7732321	AT2G17787:CDS;	AT2G17787:CDS;	-0.237674	-0.2316	hypo	hypo	no	yes	UM
Chr2	11740289	11740389	11740289	11740389	AT2TE51030:transposable_element;	AT2TE51030:transposable_element;	-0.197039	-0.286204	hypo	hypo	no	no	n/a
Chr4	2594735	2594953	2594656	2594953	AT4TE12155:transposable_element;AT4TE12160:transposable_element;	AT4TE12155:transposable_element;AT4TE12160:transposable_element;	-0.161201	-0.231224	hypo	hypo	no	no	n/a
Chr5	15415147	15415266	15415147	15415266	Intergenic	Intergenic	-0.118506	-0.148432	hypo	hypo	no	no	n/a
Chr3	20986360	20986626	20986345	20986626	AT3G56660:CDS;	AT3G56660:CDS;	-0.279465	-0.271345	hypo	hypo	no	no	UM
Chr1	8100781	8100872	8100652	8100872	AT1G22882:CDS;	AT1G22882:CDS;	-0.154714	-0.221475	hypo	hypo	no	no	UM
Chr1	4379871	4379890	4379871	4379984	AT1G12850:three_prime_UTR;	AT1G12850:three_prime_UTR;	-0.181162	-0.152794	hypo	hypo	no	no	UM
Chr1	12287794	12287886	12287794	12287826	Intergenic	Intergenic	-0.150929	-0.134266	hypo	hypo	no	no	n/a
Chr3	9154101	9154183	9154101	9154224	Intergenic	Intergenic	-0.152452	-0.22286	hypo	hypo	no	no	n/a
Chr4	5645347	5645680	5645580	5645680	AT4TE23655:transposable_element;	AT4TE23655:transposable_element;	-0.308601	-0.268325	hypo	hypo	no	no	n/a
Chr4	6542690	6542748	6542602	6542798	AT4G10590:CDS;	AT4G10590:CDS;	-0.107107	-0.128707	hypo	hypo	no	no	CG-gbm
Chr3	7307250	7307521	7307520	7307572	AT3G20860:CDS;	AT3G20860:CDS;	-0.177418	-0.131853	hypo	hypo	no	no	UM
Chr3	17399237	17399518	17399237	17399518	Intergenic	Intergenic	-0.362054	-0.343074	hypo	hypo	no	no	n/a
Chr5	25290138	25290186	25289939	25290386	AT5G63040:CDS;	AT5G63040:three_prime_UTR,CDS;	-0.144576	-0.2713	hypo	hypo	no	yes	CG-gbm
Chr1	11829388	11829493	11829373	11829493	AT1G32700:three_prime_UTR,CDS;	AT1G32700:three_prime_UTR,CDS;	-0.282757	-0.303222	hypo	hypo	no	no	UM
Chr1	6107312	6107430	6107410	6107646	AT1G17750:CDS;	AT1G17750:CDS;	-0.214618	-0.146362	hypo	hypo	no	no	UM
Chr4	10079560	10079729	10079509	10079729	AT4G18220:CDS;	AT4G18220:CDS;	-0.195302	-0.22068	hypo	hypo	no	no	UM
Chr1	25723588	25723746	25723588	25724092	Intergenic	AT1TE84340:transposable_element;	-0.366811	-0.413606	hypo	hypo	no	no	n/a
Chr1	21212253	21212407	21212116	21212268	AT1G56610:five_prime_UTR,CDS;	AT1G56610:five_prime_UTR,CDS;	-0.157502	-0.124359	hypo	hypo	no	no	CG-gbm
Chr3	9978420	9978682	9978195	9978682	AT3G27050:CDS;	AT3G27050:three_prime_UTR,CDS;	-0.16911	-0.165156	hypo	hypo	no	no	UM
Chr5	22521117	22521201	22521117	22521201	AT5G55590:CDS;	AT5G55590:CDS;	-0.162066	-0.151243	hypo	hypo	no	no	UM
Chr5	5676727	5676748	5676727	5676748	AT5G17260:CDS;	AT5G17260:CDS;	-0.156638	-0.159538	hypo	hypo	no	no	UM
Chr1	7833205	7833233	7833205	7833233	AT1TE25210:transposable_element;	AT1TE25210:transposable_element;	-0.228762	-0.279557	hypo	hypo	no	no	n/a
Chr5	6447644	6447789	6447644	6447789	AT5TE23315:transposable_element;	AT5TE23315:transposable_element;	-0.264869	-0.166126	hypo	hypo	no	no	n/a
Chr5	20358392	20358604	20358377	20358604	AT5TE73320:transposable_element;	AT5TE73320:transposable_element;	-0.218088	-0.330812	hypo	hypo	no	no	n/a
Chr2	944710	944897	944601	944821	AT2G03140:CDS;	AT2G03140:CDS;	-0.120036	-0.124829	hypo	hypo	no	yes	CG-gbm
Chr5	15137661	15137832	15137661	15137832	AT5TE54735:transposable_element;	AT5TE54735:transposable_element;	-0.222818	-0.187674	hypo	hypo	no	no	n/a
Chr2	8683271	8683314	8683271	8683395	Intergenic	Intergenic	-0.256166	-0.348186	hypo	hypo	no	no	n/a
Chr1	8492907	8492935	8492907	8492935	Intergenic	Intergenic	-0.157949	-0.116126	hypo	hypo	no	no	n/a
Chr3	21888362	21888685	21888535	21888567	AT3G59200:CDS;	AT3G59200:CDS;	-0.174205	-0.179021	hypo	hypo	no	no	UM
Chr3	1873179	1873308	1873179	1873308	AT3G06180:CDS;	AT3G06180:CDS;	-0.301378	-0.267669	hypo	hypo	no	no	UM
Chr1	24027889	24028054	24027935	24028054	AT1TE79030:transposable_element;AT1TE79035:transposable_element;	AT1TE79030:transposable_element;AT1TE79035:transposable_element;	-0.141711	-0.142611	hypo	hypo	no	no	n/a
Chr1	23430838	23430911	23430838	23430911	Intergenic	Intergenic	-0.176626	-0.195602	hypo	hypo	no	no	n/a
Chr4	6552386	6552571	6552386	6552571	Intergenic	Intergenic	-0.257611	-0.26718	hypo	hypo	no	no	n/a
Chr4	7210397	7210502	7210397	7210502	Intergenic	Intergenic	-0.257834	-0.239326	hypo	hypo	no	no	n/a
Chr1	1738916	1739074	1738697	1739074	AT1TE05700:transposable_element;	AT1TE05700:transposable_element;	-0.365868	-0.436404	hypo	hypo	no	no	n/a
Chr5	18599331	18599463	18599331	18599463	AT5TE66950:transposable_element;	AT5TE66950:transposable_element;	-0.214559	-0.330226	hypo	hypo	no	no	n/a
Chr1	23864346	23864403	23864295	23864403	AT1G64300:CDS;	AT1G64300:CDS;	-0.151644	-0.149402	hypo	hypo	no	no	CG-gbm
Chr5	15725469	15725731	15725462	15725867	AT5G39250:three_prime_UTR,CDS;	AT5G39250:three_prime_UTR,CDS;	-0.157837	-0.234335	hypo	hypo	no	no	UM
Chr5	6785219	6785353	6785219	6785353	AT5G20080:CDS;	AT5G20080:CDS;	-0.160142	-0.19835	hypo	hypo	no	no	UM
Chr2	16674375	16674547	16674196	16674408	AT2G39940:CDS;	AT2G39940:CDS;	-0.231162	-0.147162	hypo	hypo	no	no	CG-gbm
Chr2	2121634	2121751	2121595	2121751	Intergenic	Intergenic	-0.181451	-0.217804	hypo	hypo	no	no	n/a
Chr1	10496258	10496510	10496374	10496510	Intergenic	Intergenic	-0.161776	-0.135605	hypo	hypo	no	no	n/a
Chr3	21882429	21882593	21882452	21882593	AT3G59180:CDS;	AT3G59180:CDS;	-0.123684	-0.118673	hypo	hypo	no	no	UM
Chr5	13591797	13592247	13591797	13592065	AT5TE48295:transposable_element;	AT5TE48295:transposable_element;	-0.239227	-0.256703	hypo	hypo	no	no	n/a
Chr3	9638056	9638110	9637779	9638110	AT3G26295:pseudogene;	AT3G26295:pseudogene;	-0.158436	-0.179492	hypo	hypo	no	no	n/a
Chr1	20816031	20816267	20816031	20816256	Intergenic	Intergenic	-0.217187	-0.214998	hypo	hypo	no	no	n/a
Chr3	6333072	6333299	6333264	6333299	AT3G18460:CDS;	AT3G18460:CDS;	-0.14045	-0.144676	hypo	hypo	no	no	UM
Chr1	7077739	7077798	7077739	7077798	Intergenic	Intergenic	-0.326176	-0.143924	hypo	hypo	no	no	n/a
Chr5	112910	112974	112910	112974	AT5TE00390:transposable_element;	AT5TE00390:transposable_element;	-0.110649	-0.168327	hypo	hypo	no	no	n/a
Chr5	9049622	9049818	9049524	9049818	Intergenic	Intergenic	-0.135739	-0.162912	hypo	hypo	no	no	n/a
Chr2	4084355	4084440	4084355	4084440	AT2TE17275:transposable_element;	AT2TE17275:transposable_element;	-0.208122	-0.201869	hypo	hypo	no	no	n/a
Chr5	10935321	10935384	10935321	10935406	Intergenic	Intergenic	-0.141663	-0.167068	hypo	hypo	no	no	n/a
Chr4	1136093	1136251	1136093	1136162	AT4G02580:CDS;	AT4G02580:CDS;	-0.163309	-0.19232	hypo	hypo	no	no	UM
Chr4	2995016	2995186	2995046	2995186	AT4TE13955:transposable_element;	AT4TE13955:transposable_element;	-0.202924	-0.223566	hypo	hypo	no	no	n/a
Chr1	25994291	25994417	25994207	25994411	AT1G69150:CDS;	AT1G69150:CDS;	-0.123663	-0.14239	hypo	hypo	no	no	UM
Chr4	6899404	6899591	6899176	6899591	Intergenic	Intergenic	-0.171006	-0.208253	hypo	hypo	no	no	n/a
Chr3	18018744	18018764	18018711	18018764	AT3G48630:CDS;AT3TE73020:transposable_element;	AT3G48630:CDS;AT3TE73020:transposable_element;	-0.186261	-0.231746	hypo	hypo	no	no	UM
Chr5	17727074	17727131	17727012	17727131	Intergenic	Intergenic	-0.104446	-0.194979	hypo	hypo	no	no	n/a
Chr2	9783707	9783760	9783647	9783760	Intergenic	AT2TE41780:transposable_element;	-0.152893	-0.192903	hypo	hypo	no	no	n/a
Chr1	1184574	1184676	1184574	1184858	Intergenic	Intergenic	-0.126985	-0.227726	hypo	hypo	no	no	n/a
Chr3	17529487	17529697	17529487	17529697	AT3G47570:CDS;	AT3G47570:CDS;	-0.212945	-0.281499	hypo	hypo	no	no	UM
Chr3	19740430	19740451	19740430	19740451	AT3TE80170:transposable_element;	AT3TE80170:transposable_element;	-0.267527	-0.304238	hypo	hypo	no	no	n/a
Chr3	1989316	1989506	1989478	1989506	AT3G06480:CDS;	AT3G06480:CDS;	-0.134429	-0.106388	hypo	hypo	no	yes	CG-gbm
Chr1	9414119	9414157	9414122	9414157	AT1G27110:CDS;	AT1G27110:CDS;	-0.200384	-0.18466	hypo	hypo	no	no	UM
Chr1	10535010	10535023	10535010	10535023	Intergenic	Intergenic	-0.25512	-0.308862	hypo	hypo	no	no	n/a
Chr5	3143904	3144051	3143802	3144051	AT5G10030:mRNA;AT5G10040:three_prime_UTR,CDS;	AT5G10030:mRNA;AT5G10040:three_prime_UTR,CDS;	-0.21938	-0.181434	hypo	hypo	no	no	UM
Chr1	12231297	12231367	12231297	12231427	AT1TE39720:transposable_element;AT1TE39725:transposable_element;	AT1TE39720:transposable_element;AT1TE39725:transposable_element;	-0.15554	-0.161473	hypo	hypo	no	no	n/a
Chr1	22743615	22743767	22743615	22743625	Intergenic	Intergenic	-0.229098	-0.164673	hypo	hypo	no	no	n/a
Chr1	6556157	6556499	6556157	6556308	AT1TE21250:transposable_element;	AT1TE21250:transposable_element;	-0.233869	-0.226359	hypo	hypo	no	no	n/a
Chr2	238896	239042	238720	239042	Intergenic	Intergenic	-0.156659	-0.265115	hypo	hypo	no	yes	n/a
Chr4	721720	721836	721558	721836	Intergenic	Intergenic	-0.204197	-0.241813	hypo	hypo	no	no	n/a
Chr1	161678	161794	161590	161794	AT1G01440:CDS;	AT1G01440:CDS;	-0.124271	-0.102352	hypo	hypo	no	no	CG-gbm
Chr2	704673	704889	704673	704889	AT2TE03040:transposable_element;	AT2TE03040:transposable_element;	-0.145579	-0.189731	hypo	hypo	no	no	n/a
Chr5	15768675	15768715	15768675	15768715	AT5G39410:CDS;	AT5G39410:CDS;	-0.224934	-0.25685	hypo	hypo	no	yes	UM
Chr4	6761068	6761179	6761068	6761179	AT4G11080:CDS;	AT4G11080:CDS;	-0.165667	-0.170058	hypo	hypo	no	no	UM
Chr3	18645972	18645992	18645972	18646179	AT3G50301:pseudogene;	AT3G50301:pseudogene;	-0.147018	-0.290224	hypo	hypo	no	no	n/a
Chr2	15544055	15544080	15543949	15544080	AT2G37010:CDS;	AT2G37010:CDS;	-0.181254	-0.207768	hypo	hypo	no	no	UM
Chr4	7295184	7295391	7295092	7295462	Intergenic	Intergenic	-0.180904	-0.193971	hypo	hypo	no	no	n/a
Chr4	11783891	11783953	11783834	11783953	AT4G22290:CDS;	AT4G22290:CDS;	-0.166046	-0.261001	hypo	hypo	no	yes	UM
Chr4	7937001	7937086	7937052	7937086	AT4G13640:CDS;	AT4G13640:CDS;	-0.236574	-0.26561	hypo	hypo	no	no	UM
Chr3	3323707	3323771	3323707	3323771	AT3G10640:CDS;	AT3G10640:CDS;	-0.117107	-0.147818	hypo	hypo	no	yes	UM
Chr3	17419437	17419513	17419437	17419513	AT3TE70600:transposable_element;	AT3TE70600:transposable_element;	-0.207357	-0.131737	hypo	hypo	no	no	n/a
Chr1	12350422	12350456	12350422	12350526	AT1G33970:CDS;	AT1G33970:CDS;	-0.124556	-0.14252	hypo	hypo	no	no	UM
Chr1	5458949	5458972	5458949	5459012	AT1G15880:CDS;	AT1G15880:CDS;	-0.273312	-0.323048	hypo	hypo	no	no	UM
Chr4	10247994	10248163	10247994	10248163	AT4TE46700:transposable_element;	AT4TE46700:transposable_element;	-0.214696	-0.242425	hypo	hypo	no	yes	n/a
Chr3	23255604	23255734	23255604	23255890	AT3TE94780:transposable_element;	AT3TE94780:transposable_element;	-0.27421	-0.242171	hypo	hypo	no	no	n/a
Chr4	16352124	16352252	16352124	16352300	AT4G34140:CDS;	AT4G34140:CDS;	-0.189451	-0.182709	hypo	hypo	no	no	UM
Chr3	22156187	22156220	22156187	22156288	AT3G59990:CDS;	AT3G59990:CDS;	-0.106647	-0.117944	hypo	hypo	no	no	CG-gbm
Chr5	3419056	3419307	3419056	3419307	AT5G10810:CDS;	AT5G10810:CDS;	-0.170454	-0.218027	hypo	hypo	no	no	UM
Chr3	21266861	21266957	21266861	21267099	Intergenic	Intergenic	-0.252475	-0.274793	hypo	hypo	no	no	n/a
Chr1	26619745	26619787	26619584	26619787	AT1G70590:CDS;	AT1G70590:CDS;	-0.166588	-0.158976	hypo	hypo	no	no	UM
Chr4	188121	188230	188121	188230	Intergenic	Intergenic	-0.137335	-0.111115	hypo	hypo	no	no	n/a
Chr5	18136747	18136864	18136747	18136901	Intergenic	Intergenic	-0.194528	-0.196541	hypo	hypo	no	no	n/a
Chr2	16470577	16470598	16470577	16470598	AT2G39445:CDS;	AT2G39445:CDS;	-0.202103	-0.347544	hypo	hypo	no	no	UM
Chr4	11928600	11928674	11928600	11928674	Intergenic	Intergenic	-0.174111	-0.183856	hypo	hypo	no	no	n/a
Chr1	17761373	17761426	17761373	17761566	AT1G48095:CDS;	AT1G48095:CDS;	-0.195279	-0.227164	hypo	hypo	no	no	CHH-gene
Chr5	20950939	20951049	20950473	20951049	AT5G51570:CDS;	AT5G51570:CDS;	-0.121242	-0.182301	hypo	hypo	no	no	UM
Chr1	23841276	23841422	23841276	23841422	AT1G64250:transposable_element_gene;AT1TE78475:transposable_element;	AT1G64250:transposable_element_gene;AT1TE78475:transposable_element;	-0.129481	-0.108251	hypo	hypo	no	no	n/a
Chr1	9584530	9585030	9584752	9585030	AT1TE30880:transposable_element;	AT1TE30880:transposable_element;	-0.182042	-0.158337	hypo	hypo	no	no	n/a
Chr3	15941657	15941734	15941564	15941910	AT3TE64495:transposable_element;	AT3TE64495:transposable_element;	-0.15215	-0.158352	hypo	hypo	no	no	n/a
Chr4	8353718	8353787	8353718	8353787	Intergenic	Intergenic	-0.346535	-0.412054	hypo	hypo	no	no	n/a
Chr1	6048716	6048814	6048575	6048872	AT1G17580:CDS;	AT1G17580:CDS;	-0.117657	-0.121591	hypo	hypo	no	no	CG-gbm
Chr1	6611532	6611631	6611327	6611568	AT1G19140:CDS;	AT1G19140:CDS;	-0.124619	-0.139216	hypo	hypo	no	no	UM
Chr4	18182862	18183008	18182862	18183008	AT4G39020:CDS;	AT4G39020:CDS;	-0.152047	-0.137192	hypo	hypo	no	no	CHH-gene
Chr1	17234273	17234330	17234273	17234330	Intergenic	Intergenic	-0.221208	-0.177001	hypo	hypo	no	no	n/a
Chr1	12225726	12226133	12225726	12225884	Intergenic	Intergenic	-0.170781	-0.17825	hypo	hypo	no	no	n/a
Chr5	9161231	9161281	9161231	9161281	Intergenic	Intergenic	-0.129615	-0.148805	hypo	hypo	no	no	n/a
Chr5	15061954	15062000	15061954	15062047	Intergenic	AT5G37840:three_prime_UTR;	-0.197906	-0.170351	hypo	hypo	no	no	UM
Chr3	4941150	4941345	4941150	4941345	AT3G14700:three_prime_UTR,CDS;	AT3G14700:three_prime_UTR,CDS;	-0.175052	-0.174237	hypo	hypo	no	no	UM
Chr4	16103349	16103528	16103238	16103528	AT4G33470:CDS;AT4TE77130:transposable_element;	AT4G33470:CDS;AT4TE77130:transposable_element;	-0.156294	-0.275365	hypo	hypo	no	yes	UM
Chr4	2368515	2368577	2368322	2368577	AT4G04670:CDS;	AT4G04670:CDS;	-0.141484	-0.174977	hypo	hypo	no	no	CG-gbm
Chr2	15707578	15707689	15707569	15707689	Intergenic	Intergenic	-0.187338	-0.30833	hypo	hypo	no	no	n/a
Chr5	22245129	22245226	22244960	22245157	AT5G54760:CDS;	AT5G54760:CDS;	-0.135489	-0.129011	hypo	hypo	no	no	UM
Chr1	22303545	22303602	22303538	22303602	AT1G60540:pseudogene;AT1G60545:ncRNA;	AT1G60540:pseudogene;AT1G60545:ncRNA;	-0.212323	-0.237302	hypo	hypo	no	no	n/a
Chr2	10369311	10369433	10369311	10369715	Intergenic	Intergenic	-0.161188	-0.182004	hypo	hypo	no	no	n/a
Chr4	18016623	18016749	18016623	18016771	AT4G38520:CDS;	AT4G38520:CDS;	-0.18016	-0.202391	hypo	hypo	no	no	UM
Chr2	10263372	10263411	10263244	10263411	AT2G24140:CDS;	AT2G24140:CDS;	-0.241696	-0.33018	hypo	hypo	no	no	UM
Chr5	6253161	6253325	6253161	6253762	Intergenic	Intergenic	-0.2706	-0.358797	hypo	hypo	no	no	n/a
Chr2	17088315	17088343	17088315	17088561	AT2G40950:CDS;	AT2G40950:CDS;	-0.127056	-0.140931	hypo	hypo	no	no	UM
Chr3	4274944	4274997	4274944	4274997	AT3TE18020:transposable_element;	AT3TE18020:transposable_element;	-0.149994	-0.186473	hypo	hypo	no	no	n/a
Chr4	12566986	12566989	12566986	12566989	AT4G24230:three_prime_UTR;	AT4G24230:three_prime_UTR;	-0.234097	-0.260546	hypo	hypo	no	no	UM
Chr5	14286999	14287031	14286931	14287031	AT5G36260:CDS;	AT5G36260:CDS;	-0.12791	-0.154507	hypo	hypo	no	no	UM
Chr4	476282	476369	476282	476369	Intergenic	Intergenic	-0.156643	-0.192086	hypo	hypo	no	no	n/a
Chr2	18393813	18393923	18393745	18393923	Intergenic	Intergenic	-0.212332	-0.311379	hypo	hypo	no	no	n/a
Chr2	11302614	11302842	11302773	11302842	AT2TE48875:transposable_element;AT2TE48880:transposable_element;AT2TE48885:transposable_element;	AT2TE48875:transposable_element;AT2TE48880:transposable_element;AT2TE48885:transposable_element;	-0.233903	-0.18001	hypo	hypo	no	no	n/a
Chr4	10581050	10581218	10581050	10581062	AT4G19400:CDS;AT4G19410:CDS;	AT4G19400:CDS;AT4G19410:CDS;	-0.148458	-0.166743	hypo	hypo	no	no	UM
Chr2	9432166	9432228	9432166	9432228	Intergenic	Intergenic	-0.253467	-0.273814	hypo	hypo	no	no	n/a
Chr2	7047360	7047432	7047360	7047466	AT2G16270:CDS;	AT2G16270:CDS;	-0.191763	-0.192088	hypo	hypo	no	no	UM
Chr2	16620108	16620164	16620058	16620164	AT2G39830:CDS;	AT2G39830:CDS;	-0.13155	-0.175154	hypo	hypo	no	no	UM
Chr5	13596910	13596936	13596910	13596957	AT5G35390:five_prime_UTR,CDS;	AT5G35390:five_prime_UTR,CDS;	-0.155697	-0.177245	hypo	hypo	no	no	UM
Chr1	134912	134941	134912	134941	AT1G01340:CDS;	AT1G01340:CDS;	-0.1357	-0.219306	hypo	hypo	no	yes	UM
Chr3	10599150	10599263	10599150	10599263	Intergenic	Intergenic	-0.192218	-0.167753	hypo	hypo	no	no	n/a
Chr3	22076167	22076249	22076167	22076207	Intergenic	Intergenic	-0.179057	-0.164683	hypo	hypo	no	no	n/a
Chr2	16423212	16423288	16423212	16423288	Intergenic	Intergenic	-0.248217	-0.337528	hypo	hypo	no	no	n/a
Chr1	11095405	11095521	11095405	11095521	AT1G31090:CDS;	AT1G31090:CDS;	-0.156987	-0.140894	hypo	hypo	no	no	UM
Chr3	17535921	17536122	17535921	17536122	AT3G47580:three_prime_UTR;AT3G47590:three_prime_UTR;	AT3G47580:three_prime_UTR;AT3G47590:three_prime_UTR;	-0.151349	-0.190253	hypo	hypo	no	no	UM
Chr4	13230937	13230982	13230962	13230982	Intergenic	Intergenic	-0.20695	-0.194737	hypo	hypo	no	no	n/a
Chr5	17461444	17461559	17461356	17461480	AT5G43460:three_prime_UTR,CDS;	AT5G43460:CDS;	-0.156371	-0.184907	hypo	hypo	no	no	CG-gbm
Chr2	240710	240735	240611	240740	AT2TE00980:transposable_element;	AT2TE00975:transposable_element;AT2TE00980:transposable_element;	-0.225772	-0.340571	hypo	hypo	no	yes	n/a
Chr1	16621040	16621138	16620750	16621213	AT1G43850:CDS;	AT1G43850:CDS;AT1TE54780:transposable_element;	-0.125225	-0.133137	hypo	hypo	no	no	CG-gbm
Chr1	10796732	10796909	10796907	10796909	AT1G30490:CDS;	AT1G30490:CDS;	-0.174178	-0.135127	hypo	hypo	no	no	CG-gbm
Chr1	19609507	19609565	19609484	19609569	AT1G52640:CDS;	AT1G52640:CDS;	-0.117179	-0.116321	hypo	hypo	yes	no	UM
Chr3	3629241	3629344	3629241	3629344	AT3G11530:CDS;	AT3G11530:CDS;	-0.153025	-0.237602	hypo	hypo	no	yes	UM
Chr1	26397745	26397933	26397745	26398421	AT1TE86445:transposable_element;	AT1TE86445:transposable_element;	-0.218546	-0.296446	hypo	hypo	no	no	n/a
Chr5	17671105	17671188	17671151	17671347	Intergenic	AT5TE63835:transposable_element;AT5TE63840:transposable_element;	-0.255927	-0.260833	hypo	hypo	no	no	n/a
Chr1	5961534	5961705	5961302	5961555	AT1G17400:CDS;	AT1G17400:CDS;	-0.131194	-0.133115	hypo	hypo	no	no	UM
Chr3	22578282	22578337	22578234	22578337	AT3TE91990:transposable_element;	AT3TE91990:transposable_element;	-0.107372	-0.136455	hypo	hypo	no	no	n/a
Chr3	18833120	18833212	18833120	18833301	Intergenic	AT3TE76360:transposable_element;	-0.130519	-0.137123	hypo	hypo	no	no	n/a
Chr5	22063419	22063552	22063378	22063552	AT5G54320:CDS;	AT5G54320:CDS;	-0.105683	-0.130535	hypo	hypo	no	no	UM
Chr5	26521014	26521056	26521014	26521056	AT5G66410:CDS;	AT5G66410:CDS;	-0.197374	-0.2047	hypo	hypo	no	no	UM
Chr5	9544509	9544753	9544509	9544753	Intergenic	Intergenic	-0.225283	-0.238562	hypo	hypo	no	no	n/a
Chr1	8439728	8439799	8439618	8439729	AT1G23890:CDS;	AT1G23890:CDS;	-0.148745	-0.141196	hypo	hypo	no	no	UM
Chr1	10290632	10290653	10290434	10290850	AT1G29400:CDS;	AT1G29400:CDS;	-0.135924	-0.181985	hypo	hypo	no	yes	CG-gbm
Chr1	18545687	18545880	18545829	18545880	AT1TE61450:transposable_element;	AT1TE61450:transposable_element;	-0.174442	-0.170517	hypo	hypo	no	no	n/a
Chr4	10438490	10438508	10438490	10438508	AT4G19045:CDS;	AT4G19045:CDS;	-0.121418	-0.198929	hypo	hypo	no	no	UM
Chr2	7101206	7101385	7101184	7101436	AT2G16390:three_prime_UTR;AT2G16400:three_prime_UTR;	AT2G16390:three_prime_UTR;AT2G16400:three_prime_UTR;	-0.162604	-0.2543	hypo	hypo	no	no	CG-gbm
Chr3	4220479	4220533	4220511	4220533	AT3G13120:CDS;	AT3G13120:CDS;	-0.182393	-0.204989	hypo	hypo	no	no	UM
Chr5	15699039	15699188	15699148	15699257	Intergenic	AT5TE56690:transposable_element;	-0.160232	-0.151433	hypo	hypo	no	no	n/a
Chr1	24232830	24232915	24232728	24232849	AT1G65240:CDS;	AT1G65240:CDS;	-0.114091	-0.107531	hypo	hypo	no	no	UM
Chr3	760525	760544	760525	760552	Intergenic	Intergenic	-0.16172	-0.217268	hypo	hypo	no	no	n/a
Chr4	7488856	7489087	7488856	7489313	AT4G12720:CDS;	AT4G12720:CDS;	-0.149108	-0.193527	hypo	hypo	no	no	UM
Chr3	22646448	22646500	22646448	22646483	AT3G61180:CDS;	AT3G61180:CDS;	-0.112685	-0.106139	hypo	hypo	no	no	UM
Chr5	20400737	20400773	20400737	20400749	AT5TE73495:transposable_element;	AT5TE73495:transposable_element;	-0.188958	-0.190406	hypo	hypo	no	no	n/a
Chr4	6821847	6821971	6821797	6821971	AT4TE29330:transposable_element;	AT4TE29330:transposable_element;	-0.155155	-0.279286	hypo	hypo	no	no	n/a
Chr5	23273690	23273869	23273657	23273869	AT5G57450:three_prime_UTR;	AT5G57450:three_prime_UTR;	-0.163257	-0.213342	hypo	hypo	no	no	UM
Chr1	6733205	6733259	6733109	6733330	AT1G19450:CDS;	AT1G19450:CDS;	-0.177009	-0.201754	hypo	hypo	no	no	CG-gbm
Chr1	22253671	22253719	22253671	22253719	AT1TE73490:transposable_element;	AT1TE73490:transposable_element;	-0.183514	-0.252727	hypo	hypo	no	no	n/a
Chr5	6380001	6380186	6379965	6380186	AT5G19080:CDS;	AT5G19080:CDS;	-0.137106	-0.187717	hypo	hypo	no	no	UM
Chr1	11032805	11032934	11032709	11032828	Intergenic	Intergenic	-0.193437	-0.198501	hypo	hypo	no	no	n/a
Chr1	12483007	12483028	12483007	12483028	AT1TE40635:transposable_element;	AT1TE40635:transposable_element;	-0.243591	-0.220997	hypo	hypo	no	no	n/a
Chr1	22341295	22341337	22341295	22341337	AT1G60650:CDS;	AT1G60650:CDS;	-0.110194	-0.144092	hypo	hypo	no	no	CG-gbm
Chr2	5938549	5938694	5938549	5938810	Intergenic	Intergenic	-0.195869	-0.256947	hypo	hypo	no	no	n/a
Chr2	12742433	12742565	12742433	12742628	AT2G29880:CDS;	AT2G29880:CDS;	-0.145976	-0.183138	hypo	hypo	no	no	CHH-gene
Chr5	18892763	18892822	18892747	18892822	Intergenic	Intergenic	-0.17572	-0.190919	hypo	hypo	no	no	n/a
Chr1	16938838	16938953	16938838	16938953	AT1TE56110:transposable_element;	AT1TE56110:transposable_element;	-0.178152	-0.280716	hypo	hypo	no	no	n/a
Chr2	8777156	8777343	8776906	8777343	Intergenic	Intergenic	-0.225165	-0.291539	hypo	hypo	no	no	n/a
Chr1	13528822	13528875	13528822	13528875	AT1G36150:CDS;	AT1G36150:CDS;	-0.138971	-0.174214	hypo	hypo	no	no	UM
Chr1	26869367	26869424	26869367	26869469	AT1G71270:CDS;	AT1G71270:CDS;	-0.10177	-0.119609	hypo	hypo	no	no	UM
Chr5	14934420	14934451	14934420	14934479	AT5G37600:CDS;	AT5G37600:CDS;	-0.113347	-0.11743	hypo	hypo	no	no	UM
Chr5	8568329	8568378	8568329	8568361	AT5G24910:CDS;	AT5G24910:CDS;	-0.219637	-0.20703	hypo	hypo	no	no	UM
Chr3	87356	87382	87309	87382	AT3G01280:CDS;	AT3G01280:CDS;	-0.124196	-0.185503	hypo	hypo	no	no	UM
Chr4	1339359	1339481	1339244	1339720	AT4TE06830:transposable_element;	AT4TE06830:transposable_element;	-0.152726	-0.200707	hypo	hypo	no	no	n/a
Chr5	20989027	20989103	20988915	20989103	AT5G51660:CDS;	AT5G51660:CDS;	-0.123693	-0.136555	hypo	hypo	yes	yes	CG-gbm
Chr1	19085382	19085458	19085250	19085458	AT1TE63240:transposable_element;	AT1TE63240:transposable_element;	-0.121129	-0.128934	hypo	hypo	no	no	n/a
Chr5	6915838	6915899	6915779	6915899	Intergenic	Intergenic	-0.122505	-0.263946	hypo	hypo	no	no	n/a
Chr3	6429172	6429182	6429069	6429182	AT3G18680:CDS;	AT3G18680:CDS;	-0.113263	-0.120969	hypo	hypo	no	no	UM
Chr5	15052896	15052918	15052734	15053104	Intergenic	Intergenic	-0.18729	-0.282173	hypo	hypo	no	no	n/a
Chr1	28424416	28424422	28424281	28424422	AT1G75700:CDS;	AT1G75700:CDS;	-0.150395	-0.192235	hypo	hypo	no	no	UM
Chr1	8854804	8854840	8854804	8854976	AT1G25260:CDS;	AT1G25260:CDS;	-0.105044	-0.117757	hypo	hypo	no	no	UM
Chr2	12903582	12903634	12903556	12903634	AT2G30250:CDS;	AT2G30250:CDS;	-0.169491	-0.18358	hypo	hypo	no	no	UM
Chr4	5245799	5245834	5245750	5245903	AT4G08300:CDS;	AT4G08300:CDS;	-0.190459	-0.195673	hypo	hypo	no	no	UM
Chr2	15306300	15306489	15306339	15306489	Intergenic	Intergenic	-0.152536	-0.132876	hypo	hypo	no	no	n/a
Chr2	2459747	2459832	2459747	2459832	AT2G06255:three_prime_UTR;AT2TE11165:transposable_element;AT2TE11190:transposable_element;AT2TE11195:transposable_element;	AT2G06255:three_prime_UTR;AT2TE11165:transposable_element;AT2TE11190:transposable_element;AT2TE11195:transposable_element;	-0.149851	-0.195626	hypo	hypo	no	no	UM
Chr5	13658690	13658734	13658690	13658917	Intergenic	Intergenic	-0.170595	-0.223651	hypo	hypo	no	no	n/a
Chr1	19476760	19476764	19476564	19476764	Intergenic	AT1TE64480:transposable_element;	-0.198557	-0.317785	hypo	hypo	no	no	n/a
Chr3	3468827	3468916	3468827	3469254	AT3G11070:CDS;	AT3G11070:CDS;	-0.120364	-0.118202	hypo	hypo	no	no	UM
Chr4	4069722	4069725	4069722	4069947	AT4TE17620:transposable_element;	AT4TE17620:transposable_element;	-0.229029	-0.269725	hypo	hypo	no	no	n/a
Chr5	6252497	6252693	6252497	6252693	Intergenic	Intergenic	-0.294355	-0.392771	hypo	hypo	no	no	n/a
Chr1	4074097	4074267	4073985	4074443	AT1G12050:CDS;	AT1G12050:CDS;	-0.226282	-0.297769	hypo	hypo	no	no	UM
Chr3	5527451	5527501	5527451	5527501	AT3G16310:CDS;	AT3G16310:CDS;	-0.195213	-0.226781	hypo	hypo	no	no	UM
Chr2	7951128	7951156	7950670	7951231	AT2TE32970:transposable_element;	AT2TE32970:transposable_element;AT2TE32975:transposable_element;	-0.218239	-0.34327	hypo	hypo	no	no	n/a
Chr5	13555371	13555532	13555486	13555532	AT5G35341:transposable_element_gene;AT5TE48140:transposable_element;AT5TE48145:transposable_element;	AT5G35341:transposable_element_gene;AT5TE48145:transposable_element;	-0.176966	-0.154468	hypo	hypo	no	no	n/a
Chr5	7403562	7403578	7403405	7403578	AT5G22355:CDS;	AT5G22355:CDS;	-0.214375	-0.181089	hypo	hypo	no	no	UM
Chr3	20999579	20999590	20999476	20999590	Intergenic	Intergenic	-0.216993	-0.455818	hypo	hypo	no	no	n/a
Chr5	22730539	22730702	22730539	22730702	AT5G56150:CDS;	AT5G56150:CDS;	-0.165055	-0.193535	hypo	hypo	no	no	UM
Chr2	10678524	10678568	10678524	10678550	AT2TE45785:transposable_element;	AT2TE45785:transposable_element;	-0.273408	-0.197138	hypo	hypo	no	no	n/a
Chr1	12662983	12663008	12662983	12663008	AT1G34580:CDS;	AT1G34580:CDS;	-0.136807	-0.134962	hypo	hypo	no	no	UM
Chr1	247396	247404	247396	247404	AT1G01680:CDS;	AT1G01680:CDS;	-0.133039	-0.129402	hypo	hypo	no	no	UM
Chr4	1247148	1247166	1247148	1247166	AT4TE06385:transposable_element;	AT4TE06385:transposable_element;	-0.141339	-0.113026	hypo	hypo	no	no	n/a
Chr3	3388700	3388731	3388700	3388786	AT3G10820:CDS;	AT3G10820:CDS;	-0.207805	-0.223519	hypo	hypo	no	no	UM
Chr2	6896682	6896834	6896682	6896834	Intergenic	Intergenic	-0.231763	-0.232898	hypo	hypo	no	no	n/a
Chr5	7165931	7166092	7165712	7166092	AT5G21090:CDS;	AT5G21090:CDS;	-0.280424	-0.351208	hypo	hypo	no	no	UM
Chr4	14938957	14938982	14938957	14938982	AT4G30600:CDS;	AT4G30600:CDS;	-0.215346	-0.307744	hypo	hypo	no	no	UM
Chr5	25425108	25425259	25425108	25425329	AT5G63510:CDS;	AT5G63510:CDS;	-0.212398	-0.30989	hypo	hypo	no	no	UM
Chr5	6878302	6878416	6878302	6878416	AT5G20350:CDS;	AT5G20350:CDS;	-0.179908	-0.199938	hypo	hypo	no	no	CG-gbm
Chr5	26015990	26016116	26015990	26016115	AT5TE93640:transposable_element;	AT5TE93640:transposable_element;	-0.187036	-0.162051	hypo	hypo	no	no	n/a
Chr3	4716481	4716522	4716353	4716522	AT3G14205:CDS;	AT3G14205:CDS;	-0.126643	-0.158829	hypo	hypo	no	no	CG-gbm
Chr3	10714133	10714257	10714061	10714434	Intergenic	Intergenic	-0.183727	-0.308216	hypo	hypo	no	no	n/a
Chr3	17855515	17855676	17855515	17855676	AT3G48230:five_prime_UTR;	AT3G48230:five_prime_UTR;	-0.132794	-0.132447	hypo	hypo	no	no	UM
Chr2	8632446	8632466	8632338	8632498	AT2G20000:CDS;	AT2G20000:CDS;	-0.117511	-0.129052	hypo	hypo	no	no	CG-gbm
Chr1	11826675	11826778	11826675	11826778	AT1TE38325:transposable_element;	AT1TE38325:transposable_element;	-0.252729	-0.278599	hypo	hypo	no	no	n/a
ChrM	51650	51712	51479	51712	no match	no match	-0.255921	-0.306079	hypo	hypo	no	no	n/a
Chr2	10760920	10760973	10760866	10761017	AT2G25270:CDS;AT2TE46175:transposable_element;	AT2G25270:CDS;AT2TE46175:transposable_element;	-0.172836	-0.209567	hypo	hypo	no	no	CHH-gene
Chr1	6368317	6368377	6368254	6368418	AT1G18490:CDS;	AT1G18490:CDS;	-0.115534	-0.151938	hypo	hypo	no	no	UM
Chr5	15130340	15130561	15130043	15130561	AT5TE54715:transposable_element;	AT5TE54715:transposable_element;	-0.21469	-0.249666	hypo	hypo	no	no	n/a
Chr4	6595045	6595058	6594796	6595134	AT4TE28205:transposable_element;	AT4TE28205:transposable_element;	-0.225329	-0.239123	hypo	hypo	no	no	n/a
Chr1	1670404	1670413	1670404	1670413	AT1G05590:CDS;	AT1G05590:CDS;	-0.159089	-0.194457	hypo	hypo	no	no	UM
Chr3	13326880	13326977	13326802	13326977	AT3TE54475:transposable_element;AT3TE54480:transposable_element;	AT3TE54470:transposable_element;AT3TE54475:transposable_element;AT3TE54480:transposable_element;	-0.150669	-0.188046	hypo	hypo	no	no	n/a
Chr5	15105525	15105540	15105472	15105540	AT5TE54610:transposable_element;	AT5TE54610:transposable_element;	-0.161181	-0.217842	hypo	hypo	no	yes	n/a
Chr3	873230	873457	873146	873584	Intergenic	Intergenic	-0.136516	-0.262334	hypo	hypo	no	no	n/a
Chr4	2484491	2484539	2484462	2484539	AT4TE11600:transposable_element;	AT4TE11600:transposable_element;	-0.179092	-0.183939	hypo	hypo	no	no	n/a
Chr3	2104262	2104321	2104197	2104263	AT3G06660:CDS;	AT3G06660:CDS;	-0.176838	-0.157011	hypo	hypo	no	yes	UM
Chr4	7846832	7846867	7846832	7846867	AT4G13494:miRNA;	AT4G13494:miRNA;	-0.172108	-0.235013	hypo	hypo	no	no	n/a
Chr4	4334653	4334721	4334653	4334721	AT4TE18455:transposable_element;	AT4TE18455:transposable_element;	-0.223445	-0.291976	hypo	hypo	no	no	n/a
Chr2	12449011	12449175	12449011	12449175	Intergenic	Intergenic	-0.144506	-0.16404	hypo	hypo	no	no	n/a
Chr3	8944677	8944763	8944677	8944763	Intergenic	Intergenic	-0.192466	-0.194336	hypo	hypo	no	no	n/a
Chr5	19988868	19988887	19988765	19988984	Intergenic	Intergenic	-0.21219	-0.220903	hypo	hypo	no	no	n/a
Chr3	13525440	13525538	13525440	13525538	AT3TE55045:transposable_element;AT3TE55050:transposable_element;	AT3TE55045:transposable_element;AT3TE55050:transposable_element;	-0.254613	-0.271876	hypo	hypo	no	no	n/a
Chr5	26786824	26786931	26786824	26787003	AT5TE96480:transposable_element;	AT5TE96480:transposable_element;AT5TE96485:transposable_element;	-0.150857	-0.146985	hypo	hypo	no	no	n/a
Chr1	1449147	1449291	1449147	1449291	AT1G05055:CDS;	AT1G05055:CDS;	-0.129023	-0.134213	hypo	hypo	no	no	UM
Chr5	8452098	8452103	8452098	8452173	AT5TE30585:transposable_element;	AT5TE30585:transposable_element;	-0.132604	-0.120053	hypo	hypo	no	no	n/a
Chr3	3742658	3742766	3742658	3742766	AT3TE15750:transposable_element;AT3TE15755:transposable_element;	AT3TE15750:transposable_element;AT3TE15755:transposable_element;	-0.142442	-0.198589	hypo	hypo	no	no	n/a
Chr5	17405401	17405434	17405401	17405434	AT5TE62860:transposable_element;	AT5TE62860:transposable_element;	-0.243349	-0.256961	hypo	hypo	no	no	n/a
Chr5	16276368	16276412	16276368	16276412	AT5TE58780:transposable_element;	AT5TE58780:transposable_element;	-0.155061	-0.180727	hypo	hypo	no	no	n/a
Chr5	7175553	7175813	7175553	7175813	AT5G21105:CDS;AT5TE25950:transposable_element;	AT5G21105:CDS;AT5TE25950:transposable_element;	-0.134633	-0.213539	hypo	hypo	no	no	UM
Chr2	15087003	15087035	15086900	15087139	Intergenic	Intergenic	-0.174645	-0.213656	hypo	hypo	no	no	n/a
Chr4	9155579	9155592	9155579	9155592	AT4G16155:CDS;	AT4G16155:CDS;	-0.138818	-0.125592	hypo	hypo	no	no	UM
Chr5	24561470	24561478	24561407	24561478	AT5G61030:CDS;	AT5G61030:CDS;	-0.189682	-0.204071	hypo	hypo	no	no	UM
Chr4	16377833	16378080	16377833	16378214	AT4TE78590:transposable_element;	AT4TE78590:transposable_element;	-0.185861	-0.284998	hypo	hypo	no	no	n/a
Chr1	16463682	16463759	16463469	16463759	AT1TE54315:transposable_element;	AT1TE54310:transposable_element;AT1TE54315:transposable_element;	-0.12035	-0.152002	hypo	hypo	no	no	n/a
Chr1	19034532	19034546	19034532	19034546	AT1G51340:CDS;	AT1G51340:CDS;	-0.114426	-0.126537	hypo	hypo	no	no	UM
Chr5	8121539	8121627	8121199	8121540	AT5G24030:mRNA;	AT5G24030:mRNA;	-0.122122	-0.148971	hypo	hypo	no	no	UM
Chr1	20103482	20103506	20103482	20103505	AT1G53840:three_prime_UTR;	AT1G53840:three_prime_UTR;	-0.172804	-0.15361	hypo	hypo	no	no	UM
Chr5	6785656	6785660	6785656	6785660	AT5G20080:CDS;	AT5G20080:CDS;	-0.142396	-0.174281	hypo	hypo	no	no	UM
Chr3	2058282	2058534	2058282	2058534	AT3G06600:mRNA;	AT3G06600:mRNA;	-0.149119	-0.239534	hypo	hypo	no	no	UM
Chr4	15843880	15843887	15843880	15843938	AT4G32830:CDS;	AT4G32830:CDS;	-0.13462	-0.123667	hypo	hypo	no	no	UM
Chr1	20187470	20187514	20187346	20187514	Intergenic	Intergenic	-0.132348	-0.146897	hypo	hypo	no	no	n/a
Chr1	19594369	19594389	19594236	19594616	AT1TE64820:transposable_element;	AT1TE64820:transposable_element;	-0.120254	-0.173063	hypo	hypo	no	no	n/a
Chr5	13741090	13741114	13741090	13741114	AT5TE48930:transposable_element;	AT5TE48930:transposable_element;	-0.103688	-0.147513	hypo	hypo	no	no	n/a
Chr1	678296	678305	678262	678407	AT1G02980:CDS;	AT1G02980:CDS;	-0.227788	-0.233436	hypo	hypo	no	no	UM
Chr5	8314615	8314646	8314571	8314646	AT5TE30055:transposable_element;	AT5TE30055:transposable_element;	-0.113255	-0.129126	hypo	hypo	no	no	n/a
Chr5	5270884	5270897	5270790	5270885	AT5G16140:CDS;	AT5G16140:CDS;	-0.161091	-0.144365	hypo	hypo	no	no	UM
Chr2	14033739	14033751	14033690	14033751	AT2G33080:CDS;	AT2G33080:CDS;	-0.232351	-0.280234	hypo	hypo	no	no	UM
Chr2	9424495	9424497	9424495	9424497	AT2TE40050:transposable_element;	AT2TE40050:transposable_element;	-0.208522	-0.20851	hypo	hypo	no	no	n/a
Chr2	16628826	16628839	16628826	16628839	AT2G39840:mRNA;	AT2G39840:mRNA;	-0.153662	-0.187644	hypo	hypo	no	no	CG-gbm
Chr3	1417171	1417200	1417171	1417199	AT3G05070:CDS;	AT3G05070:CDS;	-0.138281	-0.134107	hypo	hypo	no	no	UM
Chr1	17385832	17385872	17385605	17385966	AT1G47400:CDS;	AT1G47400:five_prime_UTR,CDS;	-0.214033	-0.343597	hypo	hypo	no	yes	UM
Chr2	5707424	5707454	5707324	5707581	AT2G13690:CDS;	AT2G13690:CDS;	-0.147243	-0.177165	hypo	hypo	no	no	UM
Chr1	22818696	22818740	22818696	22818776	AT1TE75215:transposable_element;	AT1TE75215:transposable_element;	-0.304534	-0.321543	hypo	hypo	no	no	n/a
Chr1	7541128	7541149	7541128	7541149	Intergenic	Intergenic	-0.186777	-0.327917	hypo	hypo	no	no	n/a
Chr2	12700950	12700956	12700783	12700956	AT2G29720:CDS;	AT2G29720:CDS;	-0.240521	-0.329799	hypo	hypo	no	no	UM
Chr3	10869598	10869607	10869580	10869679	Intergenic	Intergenic	-0.122897	-0.233546	hypo	hypo	no	no	n/a
Chr1	24138086	24138146	24137800	24138198	AT1G64980:CDS;	AT1G64980:three_prime_UTR,CDS;	-0.185803	-0.391617	hypo	hypo	no	yes	UM
Chr4	13583566	13583595	13583566	13583709	AT4G27060:CDS;	AT4G27060:CDS;	-0.116362	-0.132229	hypo	hypo	no	no	UM
Chr1	2799561	2799602	2799561	2799613	AT1G08740:transposable_element_gene;AT1TE09080:transposable_element;	AT1G08740:transposable_element_gene;AT1TE09080:transposable_element;	-0.15973	-0.167	hypo	hypo	no	no	n/a
Chr3	8994708	8994830	8994829	8995094	AT3TE37615:transposable_element;	AT3TE37615:transposable_element;	-0.248104	-0.285449	hypo	hypo	no	no	n/a
Chr5	1676856	1676867	1676856	1676867	AT5TE06060:transposable_element;	AT5TE06060:transposable_element;	-0.127092	-0.122152	hypo	hypo	no	no	n/a
Chr5	1930004	1930009	1930004	1930009	AT5G06310:CDS;	AT5G06310:CDS;	-0.172947	-0.19503	hypo	hypo	no	no	UM
Chr2	11853495	11853522	11853495	11853554	AT2G27810:CDS;	AT2G27810:CDS;	-0.165685	-0.223092	hypo	hypo	no	yes	UM
Chr3	17027257	17027284	17027025	17027284	AT3G46340:CDS;AT3TE69010:transposable_element;	AT3G46340:CDS;AT3TE69010:transposable_element;	-0.134394	-0.162299	hypo	hypo	no	no	UM
Chr3	20216926	20216929	20216926	20217112	AT3G54610:CDS;	AT3G54610:CDS;	-0.197715	-0.221118	hypo	hypo	no	no	UM
Chr5	15805958	15805988	15805895	15806046	AT5G39490:CDS;	AT5G39490:CDS;	-0.173579	-0.208519	hypo	hypo	yes	no	CHG-gene
Chr5	21851082	21851097	21850963	21851136	AT5G53810:CDS;	AT5G53810:CDS;	-0.165486	-0.322773	hypo	hypo	no	no	UM
Chr5	17988329	17988352	17988329	17988862	AT5G44590:CDS;	AT5G44590:CDS;	-0.118232	-0.143686	hypo	hypo	no	yes	UM
Chr4	15200981	15200991	15200981	15200991	Intergenic	Intergenic	-0.218236	-0.296378	hypo	hypo	no	no	n/a
Chr4	9192667	9192793	9192667	9192793	AT4TE41320:transposable_element;	AT4TE41320:transposable_element;	-0.157876	-0.154013	hypo	hypo	no	no	n/a
Chr1	6973839	6973921	6973376	6974086	AT1G20110:CDS;	AT1G20110:CDS;	-0.133561	-0.173645	hypo	hypo	no	no	UM
Chr2	14041444	14041466	14041218	14041652	AT2G33110:CDS;	AT2G33110:three_prime_UTR,CDS;	-0.116896	-0.204383	hypo	hypo	no	yes	UM
Chr1	8538728	8538809	8538728	8538809	AT1TE27540:transposable_element;	AT1TE27540:transposable_element;	-0.181099	-0.164829	hypo	hypo	no	no	n/a
Chr5	18952060	18952064	18951885	18952064	AT5G46700:CDS;	AT5G46700:CDS;	-0.240103	-0.261848	hypo	hypo	no	no	UM
Chr5	5373169	5373192	5373053	5373192	AT5G16440:CDS;	AT5G16440:CDS;	-0.143718	-0.170512	hypo	hypo	no	no	UM
Chr1	2459780	2459795	2459780	2459994	AT1G07930:CDS;	AT1G07930:CDS;	-0.110627	-0.139431	hypo	hypo	no	no	UM
Chr4	348691	348794	348691	348794	AT4TE01825:transposable_element;	AT4TE01825:transposable_element;	-0.177558	-0.184628	hypo	hypo	no	no	n/a
Chr2	12913494	12913515	12913342	12913576	AT2G30290:CDS;	AT2G30290:CDS;	-0.248362	-0.2674	hypo	hypo	no	yes	UM
Chr3	5228606	5228641	5228606	5228641	AT3TE22000:transposable_element;	AT3TE22000:transposable_element;	-0.185872	-0.269646	hypo	hypo	no	no	n/a
Chr1	11117436	11117479	11117436	11117479	Intergenic	Intergenic	-0.172041	-0.165487	hypo	hypo	no	no	n/a
Chr5	8832841	8833114	8832841	8833114	AT5G25410:CDS;	AT5G25410:CDS;	-0.14627	-0.138895	hypo	hypo	no	no	UM
Chr2	11909456	11909519	11909361	11909519	AT2TE51815:transposable_element;	AT2TE51815:transposable_element;	-0.306503	-0.283709	hypo	hypo	no	no	n/a
Chr3	1312083	1312228	1312049	1312228	AT3G04780:CDS;	AT3G04780:CDS;	-0.166281	-0.193907	hypo	hypo	no	no	UM
Chr4	2020209	2020298	2020209	2020299	Intergenic	Intergenic	-0.111173	-0.139227	hypo	hypo	no	yes	n/a
Chr2	4872053	4872146	4872053	4872146	AT2TE20155:transposable_element;	AT2TE20155:transposable_element;	-0.360243	-0.471383	hypo	hypo	no	yes	n/a
Chr1	29917134	29917164	29916916	29917164	AT1G79530:CDS;	AT1G79530:CDS;	-0.114869	-0.112969	hypo	hypo	no	no	CG-gbm
Chr3	12122902	12122932	12122902	12122932	Intergenic	Intergenic	-0.123205	-0.211071	hypo	hypo	no	no	n/a
Chr4	5452059	5452089	5451831	5452090	AT4G08560:CDS;	AT4G08560:CDS;	-0.156307	-0.174133	hypo	hypo	no	no	CHH-gene
Chr4	11139158	11139171	11139118	11139171	AT4TE51100:transposable_element;	AT4TE51100:transposable_element;	-0.159164	-0.160676	hypo	hypo	no	no	n/a
Chr1	19991976	19992043	19992042	19992233	AT1G53580:CDS;	AT1G53580:CDS;	-0.171146	-0.259024	hypo	hypo	no	no	UM
Chr5	5891251	5891279	5891171	5891279	Intergenic	Intergenic	-0.151903	-0.212037	hypo	hypo	no	no	n/a
Chr4	1537645	1537655	1537644	1537708	AT4G03460:CDS;	AT4G03460:CDS;	-0.211318	-0.224284	hypo	hypo	no	no	UM
Chr4	11988196	11988199	11987970	11988199	AT4G22820:CDS;	AT4G22820:CDS;	-0.110753	-0.156653	hypo	hypo	no	no	UM
Chr3	20936670	20936674	20936598	20936901	AT3G56480:CDS;	AT3G56480:CDS;	-0.117096	-0.146845	hypo	hypo	no	yes	CG-gbm
Chr3	11265829	11266212			AT3TE46960:transposable_element;		-0.500315		hypo		no		n/a
Chr5	9962881	9963240			AT5TE36255:transposable_element;AT5TE36260:transposable_element;		-0.260214		hypo		no		n/a
Chr4	17316884	17317140			Intergenic		-0.329064		hypo		no		n/a
Chr2	2343660	2343824			AT2G06020:CDS;AT2TE10805:transposable_element;		-0.384674		hypo		no		UM
Chr4	7195518	7195778			AT4TE31320:transposable_element;		-0.298198		hypo		no		n/a
Chr1	2062576	2062993			AT1G06720:CDS;		-0.116321		hypo		no		CG-gbm
Chr4	8507952	8508131			AT4G14820:CDS;		-0.168771		hypo		yes		UM
Chr5	8780320	8780471			AT5G25300:CDS;		-0.131524		hypo		no		UM
Chr1	21602714	21603079			AT1TE71280:transposable_element;AT1TE71285:transposable_element;		-0.143153		hypo		no		n/a
Chr5	25116996	25117076			AT5G62570:three_prime_UTR;		-0.190171		hypo		no		UM
Chr1	1211851	1211993			AT1G04470:CDS;		-0.118971		hypo		yes		UM
Chr2	17037	17425			AT2TE00015:transposable_element;		-0.12178		hypo		no		n/a
Chr4	10056440	10056671			AT4G18160:CDS;		-0.160679		hypo		no		UM
Chr1	12995794	12995990			Intergenic		-0.120372		hypo		no		n/a
Chr3	10747047	10747413			AT3G28670:three_prime_UTR;		-0.1098		hypo		no		CG-gbm
Chr4	9647440	9647648			AT4G17180:CDS;		-0.17908		hypo		no		UM
Chr1	24273669	24274201			AT1G65346:CDS;AT1G65350:CDS;		-0.146156		hypo		no		CHH-gene
Chr1	3268598	3268839			AT1G10010:CDS;		-0.209468		hypo		no		UM
Chr1	26285409	26286026			Intergenic		-0.293233		hypo		no		n/a
Chr1	17976973	17977349			AT1TE59660:transposable_element;		-0.271405		hypo		no		n/a
Chr3	20899937	20900166			AT3G56370:CDS;		-0.115527		hypo		no		CG-gbm
Chr3	20555612	20555786			AT3G55440:CDS;		-0.144692		hypo		no		UM
Chr5	8851772	8851983			AT5G25430:CDS;		-0.11872		hypo		no		CG-gbm
Chr1	9224319	9224418			AT1G26690:CDS;		-0.283179		hypo		no		UM
Chr1	314021	314193			AT1G01910:CDS;		-0.157114		hypo		no		CG-gbm
Chr3	19933086	19933301			AT3G53810:three_prime_UTR,CDS;		-0.114144		hypo		no		UM
ChrM	238802	239496			no match		-0.58407		hypo		no		n/a
Chr3	1247980	1248222			AT3G04605:transposable_element_gene;AT3TE05245:transposable_element;		-0.122465		hypo		no		n/a
Chr2	7620601	7620688			AT2G17520:CDS;		-0.256586		hypo		no		UM
Chr2	8569998	8570187			Intergenic		-0.224631		hypo		no		n/a
Chr5	16144317	16144793			AT5TE58340:transposable_element;AT5TE58345:transposable_element;		-0.225281		hypo		no		n/a
Chr2	16191134	16191373			AT2G38720:CDS;		-0.19654		hypo		no		UM
Chr1	20548458	20548664			AT1TE67890:transposable_element;		-0.214043		hypo		no		n/a
Chr3	17086921	17087174			Intergenic		-0.231378		hypo		no		n/a
Chr2	10807587	10807723			AT2G25370:CDS;		-0.188078		hypo		no		CHH-gene
Chr4	2626084	2626273			AT4TE12290:transposable_element;		-0.24324		hypo		no		n/a
Chr2	17425765	17426039			AT2G41770:CDS;		-0.138159		hypo		yes		UM
Chr2	11770344	11770610			AT2TE51170:transposable_element;		-0.231248		hypo		no		n/a
Chr3	21382473	21382723			AT3G57680:CDS;		-0.423045		hypo		no		UM
Chr1	2415897	2416017			AT1G07800:transposable_element_gene;AT1TE07880:transposable_element;		-0.207984		hypo		no		n/a
Chr4	17333325	17333431			AT4G36780:CDS;		-0.149522		hypo		no		UM
Chr3	10171554	10171932			AT3TE42280:transposable_element;		-0.122771		hypo		no		n/a
Chr1	12131187	12131571			AT1TE39335:transposable_element;		-0.170637		hypo		no		n/a
Chr1	213509	213642			Intergenic		-0.138238		hypo		no		n/a
Chr2	5691553	5691782			Intergenic		-0.241628		hypo		no		n/a
Chr1	22834929	22835094			AT1G61820:five_prime_UTR;		-0.214378		hypo		no		UM
Chr4	6849027	6849077			AT4G11240:three_prime_UTR,CDS;		-0.183307		hypo		no		CG-gbm
Chr1	20539577	20539629			Intergenic		-0.219072		hypo		no		n/a
Chr2	17772574	17772755			AT2G42670:CDS;		-0.249173		hypo		no		UM
Chr1	19414843	19415293			AT1TE64310:transposable_element;		-0.301844		hypo		no		n/a
Chr2	109741	110225			Intergenic		-0.218412		hypo		no		n/a
Chr2	10619982	10620122			AT2G24960:CDS;AT2G24970:three_prime_UTR;		-0.158211		hypo		no		CG-gbm
Chr1	24317698	24317898			AT1G65450:five_prime_UTR;		-0.183114		hypo		no		UM
Chr1	21932905	21933094			AT1G59680:CDS;AT1TE72375:transposable_element;		-0.176943		hypo		no		UM
Chr4	7718702	7718791			Intergenic		-0.27267		hypo		no		n/a
Chr1	22024008	22024366			AT1TE72725:transposable_element;		-0.451918		hypo		no		n/a
Chr3	19291710	19291878			Intergenic		-0.180443		hypo		no		n/a
Chr1	4312889	4313083			AT1G12665:three_prime_UTR;		-0.202037		hypo		no		UM
Chr4	8115518	8115861			AT4G14070:CDS;		-0.122676		hypo		yes		UM
Chr1	6067940	6068360			AT1G17640:CDS;		-0.136756		hypo		no		UM
Chr2	2085897	2086129			AT2TE09540:transposable_element;		-0.15706		hypo		no		n/a
Chr5	5556639	5556695			AT5G16900:CDS;		-0.156413		hypo		no		UM
Chr5	6245609	6245795			AT5G18720:CDS;		-0.130331		hypo		no		UM
Chr3	20181615	20181823			AT3G54510:CDS;		-0.203404		hypo		no		UM
Chr5	14740184	14740372			Intergenic		-0.255823		hypo		no		n/a
Chr4	5449487	5449819			AT4TE22825:transposable_element;		-0.309832		hypo		no		n/a
Chr1	10644570	10644850			AT1G30240:CDS;		-0.150068		hypo		no		CG-gbm
Chr5	7473224	7473349			AT5G22500:CDS;		-0.123084		hypo		no		UM
Chr4	16625741	16625827			AT4G34900:CDS;		-0.372369		hypo		no		UM
Chr5	7187363	7187453			AT5G21140:three_prime_UTR,CDS;		-0.129382		hypo		no		UM
Chr2	18048273	18048418			AT2G43465:CDS;		-0.29102		hypo		no		UM
Chr1	17302161	17302381			AT1G47210:three_prime_UTR,CDS;		-0.202846		hypo		no		UM
Chr5	484173	484450			AT5G02320:CDS;		-0.127082		hypo		yes		CG-gbm
Chr3	9249048	9249217			AT3G25495:pseudogene;		-0.252801		hypo		no		n/a
Chr4	12238677	12238729			AT4G23440:CDS;		-0.100943		hypo		yes		CG-gbm
Chr2	2178839	2178985			Intergenic		-0.359736		hypo		no		n/a
Chr3	17000186	17000381			AT3TE68905:transposable_element;		-0.244983		hypo		no		n/a
Chr2	7657513	7657670			AT2G17610:transposable_element_gene;		-0.126069		hypo		no		n/a
Chr1	9925346	9925425			Intergenic		-0.223913		hypo		no		n/a
Chr5	15344130	15344267			Intergenic		-0.24528		hypo		no		n/a
Chr1	14917220	14917361			AT1G40080:transposable_element_gene;AT1TE48870:transposable_element;AT1TE48875:transposable_element;		-0.147568		hypo		no		n/a
Chr1	7776416	7776582			AT1G22060:CDS;		-0.175559		hypo		no		CG-gbm
Chr2	9196779	9197008			Intergenic		-0.365927		hypo		no		n/a
Chr1	6140584	6140697			Intergenic		-0.112484		hypo		no		n/a
Chr3	16787444	16787610			AT3TE68000:transposable_element;		-0.134977		hypo		no		n/a
Chr4	1447936	1448009			AT4G03300:transposable_element_gene;		-0.135706		hypo		no		n/a
Chr5	14932970	14933044			Intergenic		-0.131146		hypo		no		n/a
Chr1	27219527	27219605			AT1G72300:CDS;		-0.100791		hypo		no		UM
Chr2	4215993	4216301			AT2TE17785:transposable_element;		-0.123943		hypo		no		n/a
Chr3	19225660	19225743			AT3G51840:CDS;		-0.108267		hypo		no		CG-gbm
Chr1	27919641	27919741			AT1G74240:CDS;		-0.120574		hypo		yes		UM
Chr1	29669445	29669633			AT1G78915:CDS;		-0.186115		hypo		yes		UM
Chr3	18090057	18090153			AT3G48780:CDS;		-0.120694		hypo		no		CG-gbm
Chr1	28415383	28415533			AT1G75670:CDS;		-0.264938		hypo		no		UM
Chr1	21759737	21759868			AT1G58602:mRNA;		-0.160474		hypo		no		UM
Chr2	16335368	16335613			AT2G39170:five_prime_UTR,CDS;		-0.171653		hypo		yes		CG-gbm
Chr3	8907449	8907739			Intergenic		-0.338795		hypo		no		n/a
Chr4	1336386	1336440			AT4G03030:CDS;		-0.220377		hypo		no		UM
Chr5	17827157	17827406			Intergenic		-0.202292		hypo		no		n/a
Chr1	18165398	18165726			Intergenic		-0.123105		hypo		no		n/a
Chr3	12140545	12140782			AT3TE50475:transposable_element;		-0.16613		hypo		no		n/a
Chr1	25277548	25277749			AT1G67480:CDS;		-0.103582		hypo		yes		CG-gbm
Chr3	21305571	21306227			AT3TE86735:transposable_element;		-0.211477		hypo		no		n/a
Chr4	8109012	8109154			AT4TE35790:transposable_element;		-0.194145		hypo		no		n/a
Chr5	759917	760060			AT5G03190:three_prime_UTR,CDS;		-0.137883		hypo		no		UM
Chr1	855479	855610			AT1G03445:CDS;		-0.259691		hypo		no		UM
Chr5	7776583	7776911			AT5TE28145:transposable_element;		-0.222236		hypo		no		n/a
Chr1	4425053	4425086			AT1G12970:CDS;		-0.22942		hypo		no		UM
Chr5	9772901	9773090			AT5G27620:CDS;		-0.160664		hypo		no		UM
Chr1	9673641	9673939			AT1G27770:CDS;		-0.204308		hypo		no		UM
Chr2	641429	641539			Intergenic		-0.266773		hypo		no		n/a
Chr2	7755870	7755997			AT2G17840:three_prime_UTR,CDS;		-0.443261		hypo		no		UM
Chr2	14215201	14215354			AT2G33560:CDS;		-0.242075		hypo		no		UM
Chr1	19076543	19076870			Intergenic		-0.108074		hypo		no		n/a
Chr2	3418332	3418446			AT2G07717:pseudogene;		-0.246675		hypo		no		n/a
Chr1	19032203	19032543			AT1G51340:CDS;		-0.160997		hypo		no		UM
Chr5	789429	789535			AT5G03280:CDS;		-0.104769		hypo		yes		CG-gbm
Chr3	16995796	16995825			AT3TE68880:transposable_element;		-0.513389		hypo		no		n/a
Chr2	13310936	13311092			Intergenic		-0.265907		hypo		no		n/a
Chr5	21140974	21141305			Intergenic		-0.213854		hypo		no		n/a
Chr3	15780397	15780714			AT3TE63805:transposable_element;AT3TE63810:transposable_element;		-0.215303		hypo		no		n/a
Chr5	14592049	14592175			AT5G36940:CDS;		-0.172336		hypo		no		CG-gbm
Chr1	25365486	25365648			AT1G67670:CDS;		-0.144327		hypo		no		UM
Chr5	4308526	4308651			AT5G13440:CDS;		-0.170034		hypo		no		UM
Chr4	11752048	11752238			AT4TE54340:transposable_element;AT4TE54345:transposable_element;		-0.144726		hypo		no		n/a
Chr3	7331459	7331592			Intergenic		-0.18055		hypo		no		n/a
Chr4	645917	645976			AT4TE03350:transposable_element;		-0.251758		hypo		no		n/a
Chr3	15843596	15843868			AT3TE64090:transposable_element;		-0.182274		hypo		no		n/a
Chr2	179990	180051			AT2TE00670:transposable_element;		-0.203257		hypo		no		n/a
Chr1	8743106	8743285			AT1G24706:CDS;		-0.162784		hypo		no		CG-gbm
Chr5	20296126	20296322			Intergenic		-0.244752		hypo		no		n/a
Chr3	20746619	20746673			AT3G55930:CDS;		-0.148498		hypo		no		CHH-gene
Chr1	19909607	19909805			AT1TE65820:transposable_element;		-0.155602		hypo		no		n/a
Chr4	13025543	13025701			AT4G25500:five_prime_UTR;		-0.13285		hypo		no		CG-gbm
Chr4	11384395	11384446			AT4G21370:pseudogene;		-0.144084		hypo		no		n/a
Chr2	7874943	7875046			AT2G18115:pseudogene;		-0.177819		hypo		no		n/a
Chr4	15355438	15355462			AT4G31720:CDS;		-0.194181		hypo		no		UM
Chr2	18229773	18229934			AT2G44065:CDS;		-0.259391		hypo		no		CG-gbm
Chr1	25696828	25696888			AT1TE84245:transposable_element;		-0.114036		hypo		no		n/a
Chr3	1616525	1616597			AT3G05570:CDS;		-0.179014		hypo		no		UM
Chr1	22731860	22732033			Intergenic		-0.199992		hypo		no		n/a
Chr1	28504759	28504927			AT1G75920:CDS;AT1TE93240:transposable_element;		-0.181347		hypo		no		UM
Chr4	12766168	12766315			AT4G24770:three_prime_UTR,CDS;		-0.144929		hypo		no		UM
Chr5	22489821	22489916			AT5G55520:CDS;		-0.124921		hypo		no		UM
Chr2	3362723	3362807			AT2G07698:CDS;		-0.15969		hypo		no		CHH-gene
Chr3	19481183	19481385			Intergenic		-0.183291		hypo		no		n/a
Chr3	19884956	19885115			AT3G53630:CDS;		-0.165969		hypo		no		UM
Chr4	12205130	12205264			Intergenic		-0.160739		hypo		no		n/a
Chr4	2766189	2766264			AT4G05475:CDS;		-0.152548		hypo		yes		UM
Chr2	8666599	8666842			Intergenic		-0.165003		hypo		no		n/a
Chr4	5737927	5737970			AT4TE24060:transposable_element;		-0.37674		hypo		yes		n/a
Chr5	24037043	24037189			AT5G59660:CDS;		-0.126226		hypo		yes		UM
Chr5	8723630	8723727			Intergenic		-0.145369		hypo		no		n/a
Chr4	11090667	11090792			AT4G20650:CDS;		-0.316502		hypo		no		UM
Chr4	724948	725108			AT4TE03735:transposable_element;		-0.150081		hypo		no		n/a
Chr3	5202626	5202726			AT3G15400:CDS;		-0.134204		hypo		no		UM
Chr5	9048003	9048083			AT5TE32730:transposable_element;		-0.20712		hypo		no		n/a
Chr3	4631856	4631955			AT3G14000:CDS;		-0.1417		hypo		no		UM
Chr1	30149576	30149658			AT1G80150:CDS;		-0.124868		hypo		no		UM
Chr1	28436332	28436441			AT1G75730:CDS;		-0.148988		hypo		no		UM
Chr4	1096798	1097007			AT4TE05570:transposable_element;		-0.292738		hypo		no		n/a
Chr4	7852925	7853368			AT4TE34490:transposable_element;		-0.204569		hypo		no		n/a
Chr5	9661813	9661869			AT5G27360:CDS;		-0.244385		hypo		no		UM
Chr1	5395731	5395765			Intergenic		-0.212921		hypo		no		n/a
Chr3	20799776	20799843			AT3G56050:CDS;		-0.216199		hypo		no		CG-gbm
Chr1	3794886	3794946			AT1G11300:CDS;		-0.115925		hypo		yes		UM
Chr5	23984934	23985083			Intergenic		-0.348324		hypo		no		n/a
Chr1	14169553	14169749			AT1TE46545:transposable_element;		-0.215106		hypo		no		n/a
Chr4	12743644	12743759			AT4G24690:CDS;		-0.209475		hypo		no		UM
Chr3	8492172	8492278			AT3TE35610:transposable_element;		-0.254111		hypo		no		n/a
Chr4	5437651	5437879			AT4TE22760:transposable_element;		-0.253793		hypo		no		n/a
Chr5	6745804	6745858			AT5G19960:CDS;		-0.164992		hypo		no		UM
Chr5	19821338	19821603			Intergenic		-0.217212		hypo		no		n/a
Chr2	7547889	7548037			AT2G17360:CDS;		-0.251623		hypo		no		UM
Chr1	8470702	8470805			AT1G23950:CDS;		-0.131099		hypo		yes		UM
Chr1	29071482	29071567			AT1G77350:three_prime_UTR,CDS;		-0.192152		hypo		no		UM
Chr5	6135762	6135925			AT5G18490:CDS;		-0.13244		hypo		no		UM
Chr1	24182161	24182256			AT1G65090:CDS;		-0.297924		hypo		no		UM
Chr1	705096	705109			AT1G03040:CDS;		-0.221851		hypo		no		UM
Chr2	481209	481370			Intergenic		-0.147712		hypo		no		n/a
Chr3	3445000	3445056			AT3G10986:CDS;		-0.155603		hypo		no		UM
Chr5	21635798	21636114			AT5G53310:three_prime_UTR,CDS;		-0.203826		hypo		no		UM
Chr1	26761001	26761222			AT1G70970:CDS;		-0.263241		hypo		no		UM
Chr1	13171492	13171666			AT1TE42995:transposable_element;		-0.225869		hypo		no		n/a
Chr3	3225882	3226020			AT3G10380:CDS;		-0.100035		hypo		no		CG-gbm
Chr5	20007911	20007977			AT5G49340:CDS;		-0.135099		hypo		no		UM
Chr2	12881861	12881960			Intergenic		-0.218075		hypo		no		n/a
Chr5	17322337	17322520			AT5G43140:CDS;		-0.373579		hypo		no		UM
Chr1	3207124	3207307			AT1G09870:CDS;		-0.14162		hypo		no		UM
Chr1	4583617	4583719			AT1TE14870:transposable_element;		-0.186488		hypo		no		n/a
Chr2	13954803	13954848			AT2G32900:CDS;		-0.1466		hypo		no		UM
Chr4	11826751	11826875			Intergenic		-0.296802		hypo		no		n/a
Chr1	444808	444947			AT1G02270:CDS;		-0.112208		hypo		no		UM
Chr1	8254676	8254757			Intergenic		-0.177869		hypo		no		n/a
Chr1	3128974	3129145			AT1G09660:CDS;		-0.154083		hypo		no		UM
Chr3	2119241	2119408			AT3G06710:CDS;		-0.100554		hypo		no		UM
Chr1	4448289	4448468			AT1G13040:CDS;		-0.107355		hypo		no		UM
Chr5	10420976	10421409			AT5TE38025:transposable_element;		-0.134567		hypo		no		n/a
Chr3	11241345	11241485			AT3TE46830:transposable_element;		-0.265207		hypo		no		n/a
Chr3	543585	543668			AT3G02570:CDS;		-0.130489		hypo		no		UM
Chr5	10480578	10480683			Intergenic		-0.138739		hypo		no		n/a
Chr5	13866710	13866826			AT5G35690:CDS;		-0.11453		hypo		no		CG-gbm
Chr3	678876	678968			AT3G03010:three_prime_UTR;		-0.160057		hypo		no		UM
Chr5	19675836	19675964			Intergenic		-0.346063		hypo		no		n/a
Chr4	14328868	14328933			AT4TE67760:transposable_element;		-0.160961		hypo		no		n/a
Chr3	15049642	15049774			AT3TE61325:transposable_element;		-0.244554		hypo		no		n/a
Chr3	15700818	15701089			AT3G43840:CDS;		-0.254961		hypo		no		UM
Chr5	16368123	16368190			AT5G40850:CDS;		-0.190815		hypo		yes		CG-gbm
Chr4	14494073	14494160			AT4G29520:CDS;		-0.194831		hypo		no		UM
Chr3	23021972	23022154			AT3G62190:three_prime_UTR,CDS;		-0.168466		hypo		no		UM
Chr4	6806798	6806967			AT4G11160:three_prime_UTR;		-0.212179		hypo		no		CG-gbm
Chr1	28542166	28542222			AT1G76050:three_prime_UTR,CDS;		-0.135291		hypo		no		UM
Chr3	17707682	17707722			Intergenic		-0.274008		hypo		no		n/a
Chr3	9030169	9030241			AT3G24730:CDS;		-0.174955		hypo		no		UM
Chr5	22480877	22480933			AT5G55490:CDS;		-0.192775		hypo		no		UM
Chr3	17039015	17039131			AT3G46350:CDS;		-0.18388		hypo		no		UM
Chr5	18444137	18444378			AT5TE66400:transposable_element;		-0.267995		hypo		no		n/a
Chr3	18019634	18019792			AT3TE73025:transposable_element;		-0.197889		hypo		no		n/a
Chr5	7352709	7352752			AT5TE26575:transposable_element;AT5TE26580:transposable_element;		-0.168449		hypo		no		n/a
Chr1	8272945	8273002			Intergenic		-0.14283		hypo		no		n/a
Chr5	8454839	8454936			AT5G24680:CDS;		-0.118691		hypo		no		UM
Chr4	2910706	2910787			AT4G05595:transposable_element_gene;AT4TE13555:transposable_element;		-0.140426		hypo		no		n/a
Chr3	2439023	2439134			AT3G07640:CDS;		-0.155556		hypo		no		UM
Chr2	9275178	9275308			AT2G21720:CDS;		-0.173175		hypo		no		UM
Chr2	9030661	9030789			AT2TE38110:transposable_element;AT2TE38115:transposable_element;		-0.199764		hypo		no		n/a
Chr5	1026453	1026519			AT5TE03750:transposable_element;		-0.129656		hypo		no		n/a
Chr4	9737750	9737811			Intergenic		-0.121504		hypo		no		n/a
Chr5	18030514	18030682			AT5G44690:CDS;		-0.140733		hypo		no		UM
Chr3	10679008	10679109			AT3G28490:three_prime_UTR;AT3TE44370:transposable_element;		-0.138807		hypo		no		UM
Chr4	13852291	13852320			AT4G27800:three_prime_UTR,CDS;		-0.327481		hypo		no		UM
Chr5	17836810	17836885			AT5G44280:CDS;		-0.141928		hypo		yes		CG-gbm
Chr1	7440851	7441076			AT1G21250:CDS;		-0.115083		hypo		no		UM
Chr3	19027615	19027767			AT3TE77170:transposable_element;		-0.166377		hypo		no		n/a
Chr4	8733026	8733062			AT4TE39000:transposable_element;		-0.183042		hypo		no		n/a
Chr4	13029294	13029348			AT4G25515:CDS;		-0.10853		hypo		no		CG-gbm
Chr4	12221954	12222095			AT4G23400:CDS;		-0.234073		hypo		no		UM
Chr3	1064255	1064291			Intergenic		-0.238012		hypo		no		n/a
Chr4	7755397	7755415			AT4G13330:CDS;		-0.124496		hypo		no		UM
Chr1	27346746	27346777			AT1G72640:CDS;		-0.191696		hypo		no		UM
Chr3	11294919	11295023			AT3TE47075:transposable_element;		-0.221974		hypo		no		n/a
Chr5	2534432	2534647			AT5G07940:five_prime_UTR;		-0.126358		hypo		no		CG-gbm
Chr1	9545548	9545586			AT1G27480:CDS;		-0.153462		hypo		no		UM
Chr3	22954188	22954348			Intergenic		-0.349748		hypo		no		n/a
Chr1	17770733	17770819			AT1G48110:CDS;		-0.121312		hypo		no		CG-gbm
Chr3	21968005	21968008			AT3TE89485:transposable_element;		-0.242818		hypo		no		n/a
Chr2	1444530	1444603			AT2TE06680:transposable_element;		-0.307525		hypo		no		n/a
Chr1	18130393	18130423			AT1G49005:mRNA;		-0.104354		hypo		no		UM
Chr3	2469030	2469171			AT3G07730:CDS;		-0.210199		hypo		yes		UM
Chr1	3536478	3536531			AT1G10670:CDS;		-0.286705		hypo		no		UM
Chr5	19744686	19744733			AT5G48680:three_prime_UTR,CDS;		-0.26078		hypo		no		UM
Chr2	13206999	13207072			AT2G31030:CDS;		-0.268577		hypo		no		UM
Chr5	24136889	24136942			Intergenic		-0.146029		hypo		no		n/a
Chr2	17038341	17038494			AT2G40820:CDS;		-0.140911		hypo		yes		UM
Chr5	16131270	16131291			Intergenic		-0.153533		hypo		no		n/a
Chr4	13472571	13472591			AT4G26730:CDS;		-0.150519		hypo		no		CHH-gene
Chr5	602668	602792			AT5G02670:three_prime_UTR;		-0.181088		hypo		no		UM
Chr1	3897971	3898017			AT1G11593:CDS;AT1TE12675:transposable_element;		-0.118086		hypo		no		CHH-gene
Chr5	18641983	18642142			Intergenic		-0.23314		hypo		no		n/a
Chr1	19000146	19000196			Intergenic		-0.132597		hypo		no		n/a
Chr3	21047334	21047527			AT3G56850:CDS;		-0.183677		hypo		no		UM
Chr4	696279	696382			AT4G01610:CDS;		-0.177552		hypo		no		UM
Chr4	14813996	14814071			Intergenic		-0.184865		hypo		no		n/a
Chr2	676412	676545			AT2TE02910:transposable_element;		-0.141238		hypo		no		n/a
Chr3	8535236	8535419			AT3G23710:CDS;		-0.205781		hypo		no		UM
Chr3	19355119	19355141			AT3G52190:CDS;		-0.105064		hypo		no		UM
Chr5	20688262	20688338			AT5G50840:CDS;		-0.20399		hypo		no		UM
Chr1	12519799	12519854			Intergenic		-0.140259		hypo		no		n/a
Chr3	5160132	5160147			AT3G15340:CDS;		-0.135563		hypo		no		UM
Chr5	14948585	14948621			AT5G37630:CDS;		-0.114411		hypo		no		CG-gbm
Chr5	11639533	11639629			AT5TE42000:transposable_element;		-0.135765		hypo		no		n/a
Chr3	10593238	10593297			Intergenic		-0.130957		hypo		no		n/a
Chr1	7139083	7139195			AT1TE23080:transposable_element;		-0.282327		hypo		no		n/a
Chr5	15253048	15253092			Intergenic		-0.143369		hypo		no		n/a
Chr1	8971061	8971210			AT1G25540:CDS;		-0.24074		hypo		no		CG-gbm
Chr5	10193250	10193285			AT5TE37135:transposable_element;		-0.135532		hypo		no		n/a
Chr1	26564854	26564941			AT1G70490:CDS;		-0.129445		hypo		no		UM
Chr5	5352279	5352293			Intergenic		-0.185317		hypo		no		n/a
Chr5	18696724	18696897			Intergenic		-0.238389		hypo		no		n/a
Chr3	15989010	15989077			AT3G44310:three_prime_UTR;		-0.152304		hypo		no		UM
[truncated: 3,818 more rows]

## Sheet: CHG
Chromosome	5% start	5% end	10% start	10% end	5% annotation	10% annotation	5% meanDiff	10% meanDiff	5% direction	10% direction	edmr Overlap 5%	edmr Overlap 10%	Proposed baseline methylation state in A. thaliana?
Chr2	13717132	13717842	13717132	13717862	AT2G32291:pseudogene;AT2TE60380:transposable_element;	AT2G32291:pseudogene;AT2TE60380:transposable_element;	0.346615	0.474996	hyper	hyper	yes	yes	n/a	(UM = unmethylated), based on comparison to Table S4 in Niederhuth et. al. 2016. Genome biology.
Chr5	16055873	16056908	16055873	16056996	AT5TE57975:transposable_element;AT5TE57980:transposable_element;	AT5TE57975:transposable_element;AT5TE57980:transposable_element;AT5TE57985:transposable_element;	0.138006	0.175903	hyper	hyper	no	no	n/a	The multigenic DMRs are listed as being previously characteriazed as methylated here if at least one of the genes in the DMR was previously characterized as methylated
Chr5	12662281	12662593	12662281	12662560	AT5G33390:CDS;	AT5G33390:CDS;	0.224769	0.344317	hyper	hyper	yes	yes	CHG-gene
Chr3	19578237	19578477	19578210	19578404	AT3G52830:CDS;	AT3G52830:CDS;	0.167999	0.111627	hyper	hyper	no	no	CHH-gene
Chr1	24119287	24120220	24119204	24120220	AT1TE79310:transposable_element;AT1TE79315:transposable_element;AT1TE79320:transposable_element;	AT1TE79310:transposable_element;AT1TE79315:transposable_element;AT1TE79320:transposable_element;	0.105912	0.103336	hyper	hyper	no	no	n/a
Chr1	24532258	24532575	24532258	24532575	Intergenic	Intergenic	0.497018	0.202641	hyper	hyper	no	no	n/a
Chr5	16009683	16010163	16009683	16010233	AT5TE57790:transposable_element;	AT5TE57790:transposable_element;	0.127545	0.122926	hyper	hyper	no	no	n/a
Chr1	17695517	17695855	17695547	17695820	Intergenic	Intergenic	0.307294	0.250221	hyper	hyper	no	no	n/a
Chr5	18579434	18579985	18579434	18579985	AT5TE66880:transposable_element;	AT5TE66880:transposable_element;	0.16146	0.285837	hyper	hyper	no	no	n/a
Chr3	5815085	5815585	5814869	5815585	AT3G17050:transposable_element_gene;AT3TE24450:transposable_element;AT3TE24455:transposable_element;	AT3G17050:transposable_element_gene;AT3TE24450:transposable_element;AT3TE24455:transposable_element;	0.107432	0.136447	hyper	hyper	no	no	n/a
ChrM	95702	96335	95963	96154	no match	no match	0.359003	0.252655	hyper	hyper	no	no	n/a
ChrM	56760	56922	56760	56922	no match	no match	0.412986	0.306159	hyper	hyper	no	no	n/a
Chr3	10790973	10791493	10791069	10791493	Intergenic	Intergenic	0.19755	0.149753	hyper	hyper	no	no	n/a
Chr3	16377493	16377716	16377411	16377935	AT3TE66335:transposable_element;	AT3TE66335:transposable_element;	0.161094	0.216579	hyper	hyper	no	no	n/a
ChrM	73621	74011	73782	73893	no match	no match	0.304912	0.164851	hyper	hyper	no	no	n/a
Chr5	16993767	16994291	16993694	16994291	AT5G42500:three_prime_UTR;	AT5G42500:three_prime_UTR;	0.185643	0.176243	hyper	hyper	no	no	UM
Chr5	16387608	16388478	16387663	16388029	AT5TE59180:transposable_element;	AT5TE59180:transposable_element;	0.140007	0.162778	hyper	hyper	no	no	n/a
Chr4	7969355	7969703	7969355	7969703	AT4TE35070:transposable_element;AT4TE35075:transposable_element;	AT4TE35070:transposable_element;AT4TE35075:transposable_element;	0.195441	0.214154	hyper	hyper	no	no	n/a
Chr1	22627262	22627411	22627262	22627411	Intergenic	Intergenic	0.13513	0.128173	hyper	hyper	no	no	n/a
Chr4	111572	111874	111572	111667	AT4TE00545:transposable_element;AT4TE00550:transposable_element;AT4TE00555:transposable_element;	AT4TE00545:transposable_element;AT4TE00550:transposable_element;	0.214245	0.129034	hyper	hyper	no	no	n/a
Chr3	8894365	8895111	8894581	8895111	AT3G24465:CDS;	AT3G24465:CDS;	0.184801	0.159753	hyper	hyper	no	no	CHH-gene
Chr1	2334945	2335526	2334995	2335242	AT1TE07620:transposable_element;AT1TE07625:transposable_element;	AT1TE07620:transposable_element;	0.162946	0.125493	hyper	hyper	no	no	n/a
Chr3	9393805	9394200	9393805	9394399	AT3G25727:CDS;	AT3G25727:CDS;AT3TE39230:transposable_element;	0.134281	0.183182	hyper	hyper	no	yes	CHH-gene
Chr5	22705159	22705548	22705105	22705736	AT5G56061:pseudogene;	AT5G56061:pseudogene;	0.111924	0.223098	hyper	hyper	no	no	n/a
Chr5	2688525	2689163	2688525	2689154	Intergenic	Intergenic	0.102004	0.109054	hyper	hyper	no	no	n/a
Chr3	7142378	7143300	7142378	7142893	AT3TE30000:transposable_element;AT3TE30005:transposable_element;	AT3TE30000:transposable_element;	0.255974	0.185661	hyper	hyper	no	no	n/a
Chr3	8294685	8295146	8294685	8295146	Intergenic	Intergenic	0.11984	0.134755	hyper	hyper	no	no	n/a
Chr1	29577951	29578478	29577951	29578254	AT1TE96750:transposable_element;	AT1TE96750:transposable_element;	0.253433	0.127478	hyper	hyper	no	no	n/a
Chr5	20498015	20498196	20498015	20498196	Intergenic	Intergenic	0.126766	0.101784	hyper	hyper	no	no	n/a
Chr5	14138931	14139367	14138978	14139367	AT5TE50470:transposable_element;	AT5TE50470:transposable_element;	0.208744	0.206612	hyper	hyper	no	no	n/a
Chr5	18650299	18650667	18650299	18650692	AT5G45980:CDS;AT5TE67140:transposable_element;	AT5G45980:CDS;AT5TE67140:transposable_element;	0.183841	0.243305	hyper	hyper	no	no	CHG-gene
Chr1	8577036	8577562	8576743	8577562	AT1TE27665:transposable_element;	AT1TE27665:transposable_element;	0.12109	0.191296	hyper	hyper	no	no	n/a
Chr5	19675411	19675835	19675504	19675835	Intergenic	Intergenic	0.170949	0.17313	hyper	hyper	no	no	n/a
Chr4	11240949	11241120	11240949	11241000	AT4G21060:CDS;	AT4G21060:CDS;	0.162494	0.116465	hyper	hyper	no	no	CG-gbm
Chr5	19178945	19179364	19178945	19179256	AT5TE69000:transposable_element;	AT5TE69000:transposable_element;	0.205354	0.162255	hyper	hyper	no	no	n/a
Chr2	18288855	18289597	18289107	18289304	AT2TE82905:transposable_element;	AT2TE82905:transposable_element;	0.186969	0.215523	hyper	hyper	no	no	n/a
Chr5	3688094	3688290	3687932	3688290	Intergenic	Intergenic	0.27277	0.30638	hyper	hyper	no	no	n/a
Chr3	20056008	20056398	20055868	20056398	AT3TE81505:transposable_element;	AT3TE81505:transposable_element;	0.214254	0.193585	hyper	hyper	no	no	n/a
Chr3	10171879	10172161	10171821	10172121	Intergenic	Intergenic	0.128143	0.12253	hyper	hyper	no	no	n/a
Chr1	9837188	9837737	9837188	9837568	AT1TE31660:transposable_element;AT1TE31665:transposable_element;	AT1TE31660:transposable_element;	0.207979	0.129284	hyper	hyper	no	no	n/a
Chr3	21968902	21969317	21968854	21969446	Intergenic	Intergenic	0.101947	0.168946	hyper	hyper	no	no	n/a
Chr4	11148269	11148955	11147908	11148792	Intergenic	Intergenic	0.171368	0.246546	hyper	hyper	no	no	n/a
Chr1	21640193	21640441	21640193	21640441	AT1TE71410:transposable_element;	AT1TE71410:transposable_element;	0.195701	0.302422	hyper	hyper	no	no	n/a
Chr3	17382803	17383178	17382803	17383402	AT3TE70475:transposable_element;AT3TE70480:transposable_element;	AT3TE70475:transposable_element;AT3TE70480:transposable_element;	0.13145	0.190989	hyper	hyper	no	no	n/a
Chr1	7851990	7852477	7852030	7852477	AT1TE25275:transposable_element;	AT1TE25275:transposable_element;	0.112525	0.220525	hyper	hyper	no	no	n/a
Chr3	17495703	17496246	17495617	17496136	Intergenic	Intergenic	0.137777	0.258404	hyper	hyper	no	no	n/a
Chr5	16556556	16556790	16556308	16556790	Intergenic	Intergenic	0.106973	0.125383	hyper	hyper	no	no	n/a
Chr2	18395872	18396120	18395817	18396120	AT2G44570:CDS;	AT2G44570:CDS;	0.211296	0.277532	hyper	hyper	no	no	CHH-gene
Chr4	2617953	2618364	2618018	2618364	AT4TE12260:transposable_element;	Intergenic	0.199703	0.159604	hyper	hyper	no	no	n/a
Chr2	7691518	7691846	7691549	7691846	AT2TE31710:transposable_element;AT2TE31715:transposable_element;	AT2TE31710:transposable_element;AT2TE31715:transposable_element;	0.227253	0.182484	hyper	hyper	no	no	n/a
Chr1	16561412	16562113	16561654	16562113	AT1TE54605:transposable_element;	AT1TE54605:transposable_element;	0.294721	0.243374	hyper	hyper	no	no	n/a
Chr1	3925778	3926321	3925778	3926974	AT1TE12770:transposable_element;	AT1TE12770:transposable_element;AT1TE12775:transposable_element;	0.100825	0.100622	hyper	hyper	no	no	n/a
Chr1	12070738	12071208	12070770	12071208	Intergenic	Intergenic	0.11299	0.115996	hyper	hyper	no	no	n/a
Chr3	4497449	4497731	4497398	4497731	Intergenic	Intergenic	0.239068	0.198007	hyper	hyper	no	no	n/a
Chr3	22260275	22260868	22260381	22260870	AT3TE90650:transposable_element;	AT3TE90650:transposable_element;	0.137409	0.124404	hyper	hyper	no	no	n/a
Chr4	6394587	6395103	6394384	6395283	AT4G10310:CDS;AT4TE27255:transposable_element;AT4TE27260:transposable_element;	AT4G10310:CDS;AT4TE27255:transposable_element;AT4TE27260:transposable_element;	0.251302	0.207395	hyper	hyper	no	no	UM
Chr2	13312949	13313485	13313084	13313544	AT2TE58430:transposable_element;	AT2TE58430:transposable_element;	0.192334	0.180875	hyper	hyper	no	no	n/a
Chr1	21054891	21055287	21055210	21055475	Intergenic	Intergenic	0.159647	0.123789	hyper	hyper	no	no	n/a
Chr3	15564149	15564869	15564149	15564869	AT3TE62985:transposable_element;	AT3TE62985:transposable_element;	0.139411	0.183505	hyper	hyper	no	no	n/a
Chr4	144786	144919	144786	145107	AT4TE00745:transposable_element;	AT4TE00745:transposable_element;	0.211311	0.207633	hyper	hyper	no	no	n/a
Chr1	26359677	26360048	26359677	26359936	AT1TE86330:transposable_element;AT1TE86335:transposable_element;AT1TE86340:transposable_element;	AT1TE86330:transposable_element;	0.185874	0.251635	hyper	hyper	no	no	n/a
Chr1	1875405	1875966	1875405	1875966	AT1G06148:three_prime_UTR;	AT1G06148:three_prime_UTR;	0.233241	0.20631	hyper	hyper	no	no	UM
Chr5	13367726	13368030	13367572	13368030	AT5TE47360:transposable_element;	AT5TE47360:transposable_element;	0.101657	0.156027	hyper	hyper	no	no	n/a
Chr4	604495	604639	604495	604729	AT4TE03160:transposable_element;	AT4TE03160:transposable_element;AT4TE03165:transposable_element;	0.164927	0.212046	hyper	hyper	no	no	n/a
Chr3	8654151	8654497	8654169	8654660	AT3G23950:CDS;	Intergenic	0.117711	0.136885	hyper	hyper	no	no	UM
Chr1	24317638	24318004	24317638	24318024	AT1G65450:five_prime_UTR;	AT1G65450:CDS,five_prime_UTR;	0.232234	0.337962	hyper	hyper	no	no	UM
Chr3	17163815	17164162	17163685	17164304	AT3TE69540:transposable_element;AT3TE69545:transposable_element;AT3TE69550:transposable_element;	AT3TE69540:transposable_element;AT3TE69545:transposable_element;AT3TE69550:transposable_element;	0.180135	0.181287	hyper	hyper	no	no	n/a
Chr5	14896049	14896482	14896349	14896370	Intergenic	Intergenic	0.235818	0.147573	hyper	hyper	no	no	n/a
Chr4	5297710	5297975	5297710	5297975	Intergenic	Intergenic	0.138823	0.219224	hyper	hyper	no	no	n/a
Chr1	11287108	11287305	11286840	11287305	AT1TE36510:transposable_element;	AT1TE36510:transposable_element;	0.112652	0.226449	hyper	hyper	no	no	n/a
Chr5	19139507	19140169	19139505	19140210	AT5TE68850:transposable_element;AT5TE68855:transposable_element;	AT5TE68850:transposable_element;AT5TE68855:transposable_element;	0.111785	0.146966	hyper	hyper	no	no	n/a
Chr3	10535663	10535955	10535663	10535752	AT3G28260:CDS;	AT3G28260:CDS;	0.15357	0.120444	hyper	hyper	no	no	UM
Chr5	13472775	13473833	13471804	13473833	AT5TE47765:transposable_element;AT5TE47770:transposable_element;AT5TE47775:transposable_element;	AT5G35207:transposable_element_gene;AT5TE47755:transposable_element;AT5TE47760:transposable_element;AT5TE47765:transposable_element;AT5TE47770:transposable_element;AT5TE47775:transposable_element;	0.133779	0.104274	hyper	hyper	no	no	n/a
Chr4	14569110	14569600	14569110	14569600	AT4G29740:CDS,three_prime_UTR;	AT4G29740:CDS,three_prime_UTR;	0.134982	0.165677	hyper	hyper	no	no	UM
Chr1	7312829	7313296	7312908	7313549	AT1G20967:CDS;	AT1G20967:CDS;	0.154255	0.159708	hyper	hyper	no	no	CHH-gene
Chr5	21162497	21162884	21162717	21162724	AT5G52070:CDS;AT5TE76210:transposable_element;	AT5G52070:CDS;	0.124023	0.103944	hyper	hyper	no	no	CHH-gene
Chr5	6159199	6159558	6158991	6159558	Intergenic	Intergenic	0.291729	0.253333	hyper	hyper	no	no	n/a
Chr1	26712150	26712371	26712150	26712371	Intergenic	Intergenic	0.161137	0.123724	hyper	hyper	no	no	n/a
Chr3	8407244	8407624	8407244	8407834	AT3TE35250:transposable_element;	AT3TE35250:transposable_element;	0.106454	0.13431	hyper	hyper	no	no	n/a
Chr1	23363357	23363819	23363357	23364089	AT1TE76970:transposable_element;	AT1TE76970:transposable_element;AT1TE76975:transposable_element;	0.109067	0.112537	hyper	hyper	no	no	n/a
Chr3	7636929	7637214	7636843	7637214	AT3TE32090:transposable_element;	AT3TE32090:transposable_element;	0.127598	0.181101	hyper	hyper	no	no	n/a
Chr5	19640414	19640752	19640414	19640482	AT5TE70660:transposable_element;AT5TE70670:transposable_element;	AT5TE70660:transposable_element;	0.186918	0.111662	hyper	hyper	no	no	n/a
Chr4	7838905	7839095	7838905	7838971	AT4TE34395:transposable_element;AT4TE34400:transposable_element;	AT4TE34395:transposable_element;AT4TE34400:transposable_element;	0.147064	0.140312	hyper	hyper	no	no	n/a
Chr1	28285724	28286076	28285685	28285859	Intergenic	Intergenic	0.272772	0.177439	hyper	hyper	no	no	n/a
Chr1	18605463	18605768	18605463	18605768	AT1TE61660:transposable_element;	AT1TE61660:transposable_element;	0.207149	0.177845	hyper	hyper	no	no	n/a
Chr5	4776011	4776240	4776011	4776240	Intergenic	Intergenic	0.207152	0.172793	hyper	hyper	no	no	n/a
Chr3	10075129	10075351	10074834	10075349	AT3TE41940:transposable_element;	AT3TE41940:transposable_element;	0.104624	0.140818	hyper	hyper	no	no	n/a
Chr5	24118213	24118537	24118366	24118384	AT5TE86765:transposable_element;	AT5TE86765:transposable_element;	0.113705	0.102444	hyper	hyper	no	no	n/a
Chr2	17274956	17275110	17274956	17275110	AT2TE77895:transposable_element;	AT2TE77895:transposable_element;	0.157116	0.245896	hyper	hyper	no	no	n/a
Chr2	1160314	1160442	1160382	1160442	AT2TE05245:transposable_element;	AT2TE05245:transposable_element;	0.198401	0.115662	hyper	hyper	no	no	n/a
Chr5	19962016	19962359	19961882	19962359	Intergenic	Intergenic	0.133866	0.148316	hyper	hyper	no	no	n/a
Chr5	22674413	22674615	22674413	22674615	Intergenic	Intergenic	0.102721	0.163495	hyper	hyper	no	no	n/a
Chr4	6326771	6327091	6326417	6327093	AT4TE26940:transposable_element;	AT4TE26940:transposable_element;	0.117079	0.202176	hyper	hyper	no	no	n/a
Chr2	8683306	8683738	8683270	8683639	Intergenic	Intergenic	0.120914	0.1175	hyper	hyper	no	no	n/a
Chr1	16624546	16624721	16624659	16624721	AT1TE54795:transposable_element;	AT1TE54795:transposable_element;	0.122838	0.155501	hyper	hyper	no	no	n/a
Chr3	759611	760089	759892	760089	AT3TE03210:transposable_element;	AT3TE03210:transposable_element;	0.400176	0.347562	hyper	hyper	no	no	n/a
Chr3	21436221	21436403	21436221	21436483	Intergenic	Intergenic	0.108237	0.112691	hyper	hyper	no	no	n/a
Chr5	15528109	15528125	15528109	15528494	AT5TE56125:transposable_element;	AT5TE56125:transposable_element;AT5TE56130:transposable_element;	0.138179	0.159095	hyper	hyper	no	no	n/a
Chr4	8466068	8466258	8466127	8466258	Intergenic	Intergenic	0.119954	0.109103	hyper	hyper	no	no	n/a
Chr5	25440581	25440752	25440478	25440811	AT5TE91520:transposable_element;	AT5G63540:three_prime_UTR;AT5TE91520:transposable_element;	0.128302	0.142706	hyper	hyper	no	no	UM
Chr4	7067232	7067500	7067232	7067500	AT4G11730:CDS;AT4TE30640:transposable_element;	AT4G11730:CDS;AT4TE30640:transposable_element;	0.19454	0.163446	hyper	hyper	no	no	UM
Chr5	20978944	20979379	20978370	20979379	AT5G51650:CDS;	AT5G51650:CDS;	0.12241	0.150646	hyper	hyper	no	no	CHH-gene
Chr1	8495162	8495274	8495260	8495274	Intergenic	Intergenic	0.289255	0.196504	hyper	hyper	no	no	n/a
Chr3	6717368	6718037	6717368	6718420	AT3TE28210:transposable_element;	AT3TE28210:transposable_element;AT3TE28215:transposable_element;	0.163178	0.158376	hyper	hyper	no	no	n/a
Chr3	6336218	6336483	6336390	6336483	AT3TE26660:transposable_element;	AT3TE26660:transposable_element;	0.182504	0.123893	hyper	hyper	no	no	n/a
Chr4	12110673	12110807	12110673	12110807	AT4TE56160:transposable_element;AT4TE56165:transposable_element;	AT4TE56160:transposable_element;AT4TE56165:transposable_element;	0.203179	0.197472	hyper	hyper	no	no	n/a
Chr2	7622563	7622702	7622563	7622702	AT2TE31380:transposable_element;	AT2TE31380:transposable_element;	0.247589	0.212213	hyper	hyper	no	no	n/a
Chr4	66846	66867	66846	66867	AT4TE00310:transposable_element;	AT4TE00310:transposable_element;	0.525842	0.272951	hyper	hyper	no	no	n/a
Chr1	22067601	22067642	22067384	22067642	Intergenic	Intergenic	0.127466	0.149858	hyper	hyper	no	no	n/a
Chr1	11174151	11174401	11174151	11174401	AT1TE36115:transposable_element;AT1TE36120:transposable_element;	AT1TE36115:transposable_element;AT1TE36120:transposable_element;	0.10666	0.20511	hyper	hyper	no	no	n/a
Chr3	4263308	4263390	4263308	4263390	Intergenic	Intergenic	0.197352	0.293901	hyper	hyper	no	no	n/a
Chr5	15403377	15403805	15403377	15403805	AT5TE55715:transposable_element;	AT5TE55715:transposable_element;	0.184491	0.204941	hyper	hyper	no	no	n/a
Chr5	18800719	18800995	18800719	18801261	AT5TE67695:transposable_element;	AT5G46350:three_prime_UTR;AT5TE67695:transposable_element;	0.119172	0.170922	hyper	hyper	no	no	UM
Chr1	24871506	24871989	24871506	24872039	AT1TE81685:transposable_element;AT1TE81690:transposable_element;	AT1TE81685:transposable_element;AT1TE81690:transposable_element;	0.155215	0.179561	hyper	hyper	no	no	n/a
Chr5	8312599	8312853	8312599	8312742	AT5TE30045:transposable_element;	AT5TE30045:transposable_element;	0.110754	0.116381	hyper	hyper	no	no	n/a
Chr4	66420	66545	66487	66545	AT4TE00305:transposable_element;AT4TE00310:transposable_element;	AT4TE00310:transposable_element;	0.236264	0.17791	hyper	hyper	no	no	n/a
Chr1	25729006	25729546	25728740	25729247	AT1TE84355:transposable_element;AT1TE84360:transposable_element;	AT1TE84350:transposable_element;AT1TE84355:transposable_element;AT1TE84360:transposable_element;	0.223042	0.210127	hyper	hyper	no	no	n/a
Chr3	1283003	1283092	1283054	1283092	AT3TE05380:transposable_element;	AT3TE05380:transposable_element;	0.138708	0.10787	hyper	hyper	no	no	n/a
Chr1	18325129	18325519	18325356	18325728	AT1TE60740:transposable_element;	AT1TE60740:transposable_element;	0.129516	0.136333	hyper	hyper	no	no	n/a
Chr3	7274795	7274990	7274795	7274894	Intergenic	Intergenic	0.13267	0.1147	hyper	hyper	no	no	n/a
Chr4	7267427	7267654	7267427	7267654	AT4TE31645:transposable_element;AT4TE31650:transposable_element;	AT4TE31645:transposable_element;AT4TE31650:transposable_element;	0.205432	0.105694	hyper	hyper	no	no	n/a
Chr5	5786198	5786387	5786198	5786242	AT5TE20935:transposable_element;	AT5TE20935:transposable_element;	0.124133	0.116704	hyper	hyper	no	no	n/a
Chr1	24745006	24745409	24745227	24745409	AT1TE81285:transposable_element;	AT1TE81285:transposable_element;	0.152084	0.123549	hyper	hyper	no	no	n/a
Chr5	15643190	15643582	15643190	15643425	AT5TE56580:transposable_element;	AT5TE56580:transposable_element;	0.12872	0.222017	hyper	hyper	no	no	n/a
Chr3	4274943	4275273	4274943	4275014	AT3TE18020:transposable_element;	AT3TE18020:transposable_element;	0.269146	0.213093	hyper	hyper	no	no	n/a
Chr3	10709151	10709348	10709151	10709348	AT3TE44490:transposable_element;	AT3TE44490:transposable_element;	0.151034	0.224801	hyper	hyper	no	no	n/a
Chr2	19172413	19172777	19172675	19172687	AT2TE87285:transposable_element;AT2TE87290:transposable_element;	AT2TE87290:transposable_element;	0.186735	0.122587	hyper	hyper	no	no	n/a
Chr1	21217980	21218103	21217770	21218103	Intergenic	Intergenic	0.105384	0.150632	hyper	hyper	no	no	n/a
Chr5	5749054	5749115	5749054	5749115	Intergenic	Intergenic	0.109085	0.136919	hyper	hyper	no	no	n/a
Chr3	18457949	18458090	18457949	18458090	AT3TE74890:transposable_element;	AT3TE74890:transposable_element;	0.195648	0.128723	hyper	hyper	no	no	n/a
Chr5	16178237	16178423	16178196	16178423	AT5TE58475:transposable_element;	AT5TE58475:transposable_element;	0.102617	0.100257	hyper	hyper	no	no	n/a
Chr3	11217593	11217892	11217593	11217972	AT3TE46725:transposable_element;	AT3TE46725:transposable_element;	0.105869	0.119426	hyper	hyper	no	no	n/a
Chr4	6890272	6890350	6890318	6890350	Intergenic	Intergenic	0.189247	0.111899	hyper	hyper	no	no	n/a
Chr5	8344650	8344821	8344650	8344821	Intergenic	Intergenic	0.216816	0.19917	hyper	hyper	no	no	n/a
Chr5	8439995	8440103	8439995	8440198	Intergenic	Intergenic	0.175067	0.206914	hyper	hyper	no	no	n/a
Chr3	6624026	6624226	6624026	6624493	AT3TE27825:transposable_element;	AT3TE27825:transposable_element;	0.195907	0.152261	hyper	hyper	no	no	n/a
Chr1	13218153	13218279	13218076	13218685	Intergenic	AT1TE43180:transposable_element;	0.147236	0.174897	hyper	hyper	no	no	n/a
Chr1	24683074	24683529	24682966	24683529	AT1G66235:CDS;	AT1G66235:CDS;	0.150123	0.223509	hyper	hyper	no	no	CHH-gene
Chr4	2535570	2536008	2535356	2536008	AT4TE11860:transposable_element;AT4TE11865:transposable_element;	AT4G04960:three_prime_UTR;AT4TE11860:transposable_element;AT4TE11865:transposable_element;	0.100064	0.138192	hyper	hyper	no	no	CG-gbm
Chr3	557488	557660	557480	557660	AT3G02610:three_prime_UTR;	AT3G02610:three_prime_UTR;	0.108136	0.112977	hyper	hyper	no	no	UM
Chr2	10289744	10289903	10289712	10290125	AT2TE44040:transposable_element;	AT2TE44040:transposable_element;	0.113676	0.173082	hyper	hyper	no	no	n/a
Chr4	10748113	10748246	10748113	10748246	AT4TE49240:transposable_element;	AT4TE49240:transposable_element;	0.141418	0.15493	hyper	hyper	no	no	n/a
Chr1	25673949	25674012	25673949	25674374	Intergenic	Intergenic	0.117848	0.160322	hyper	hyper	no	no	n/a
Chr5	16642527	16642803	16642527	16642803	AT5TE60080:transposable_element;	AT5TE60080:transposable_element;	0.145592	0.244302	hyper	hyper	no	no	n/a
Chr2	11124086	11124320	11123458	11124320	Intergenic	AT2G26120:CDS;	0.100254	0.161143	hyper	hyper	no	no	CHG-gene
Chr1	4415221	4415452	4415314	4415977	AT1TE14350:transposable_element;	AT1TE14350:transposable_element;AT1TE14355:transposable_element;	0.174349	0.156243	hyper	hyper	no	no	n/a
Chr4	929930	929981	929930	929981	Intergenic	Intergenic	0.243326	0.231556	hyper	hyper	no	no	n/a
Chr1	11935439	11935582	11935439	11935683	Intergenic	Intergenic	0.102602	0.102053	hyper	hyper	no	no	n/a
Chr3	19437411	19437481	19437421	19437481	AT3TE78885:transposable_element;AT3TE78890:transposable_element;	AT3TE78885:transposable_element;AT3TE78890:transposable_element;	0.185575	0.101747	hyper	hyper	no	no	n/a
Chr5	2252356	2252577	2252570	2252577	AT5G07210:CDS;	AT5G07210:CDS;	0.151744	0.17082	hyper	hyper	no	no	CHH-gene
Chr1	22088839	22088964	22088576	22089751	Intergenic	AT1TE72925:transposable_element;AT1TE72930:transposable_element;	0.154719	0.189845	hyper	hyper	no	no	n/a
Chr5	10334875	10334892	10334875	10335128	Intergenic	Intergenic	0.125285	0.251901	hyper	hyper	no	no	n/a
Chr5	9770041	9770301	9770041	9770624	AT5TE35520:transposable_element;AT5TE35525:transposable_element;	AT5TE35520:transposable_element;AT5TE35525:transposable_element;AT5TE35530:transposable_element;	0.10938	0.120682	hyper	hyper	no	no	n/a
Chr5	3019628	3019758	3019721	3019758	AT5TE10990:transposable_element;	AT5TE10990:transposable_element;	0.199392	0.138674	hyper	hyper	no	no	n/a
Chr4	17837637	17837696	17837637	17837696	AT4G37940:CDS;AT4TE86210:transposable_element;	AT4G37940:CDS;AT4TE86210:transposable_element;	0.139565	0.167193	hyper	hyper	no	no	UM
Chr5	15900706	15900792	15900706	15900892	Intergenic	Intergenic	0.150004	0.172445	hyper	hyper	no	no	n/a
Chr5	16561165	16561346	16561165	16561410	AT5G41380:three_prime_UTR;AT5TE59815:transposable_element;	AT5G41380:three_prime_UTR;AT5TE59815:transposable_element;	0.120935	0.266184	hyper	hyper	no	no	UM
Chr2	11544691	11544833	11544831	11545003	Intergenic	Intergenic	0.16965	0.152734	hyper	hyper	no	no	n/a
Chr5	7648278	7648484	7648325	7648843	AT5TE27650:transposable_element;	AT5TE27650:transposable_element;	0.127398	0.125202	hyper	hyper	no	no	n/a
Chr2	16273462	16273651	16273462	16273506	Intergenic	Intergenic	0.295372	0.213916	hyper	hyper	no	no	n/a
Chr3	9649333	9649364	9649333	9649364	Intergenic	Intergenic	0.159104	0.167111	hyper	hyper	no	no	n/a
Chr2	7539988	7540293	7539988	7540505	AT2TE31000:transposable_element;	AT2TE31000:transposable_element;	0.133307	0.146737	hyper	hyper	no	no	n/a
Chr5	16880233	16880329	16879475	16880637	AT5TE60955:transposable_element;	AT5TE60945:transposable_element;AT5TE60950:transposable_element;AT5TE60955:transposable_element;	0.105856	0.12365	hyper	hyper	no	no	n/a
Chr1	2993293	2993445	2993188	2993458	AT1G09260:CDS;	AT1G09260:CDS;	0.142289	0.168436	hyper	hyper	no	no	CHH-gene
Chr3	18530843	18531056	18530784	18531169	AT3G49980:CDS;	AT3G49980:CDS;	0.11351	0.194685	hyper	hyper	no	no	CHH-gene
Chr2	7874945	7875026	7874945	7874987	AT2G18115:pseudogene;	AT2G18115:pseudogene;	0.168421	0.182515	hyper	hyper	no	no	n/a
Chr3	9702686	9702820	9702636	9702951	Intergenic	AT3TE40445:transposable_element;	0.115829	0.162326	hyper	hyper	no	no	n/a
Chr1	1522922	1523199	1522951	1523395	AT1TE05000:transposable_element;	AT1TE05000:transposable_element;	0.128759	0.201537	hyper	hyper	no	no	n/a
Chr4	12719842	12720061	12719704	12720061	AT4TE59360:transposable_element;	AT4G24644:CDS;AT4TE59360:transposable_element;	0.100822	0.233467	hyper	hyper	no	no	UM
Chr1	21995605	21995648	21995605	21995648	AT1G59780:CDS;AT1TE72630:transposable_element;	AT1G59780:CDS;AT1TE72630:transposable_element;	0.128887	0.14476	hyper	hyper	no	no	UM
Chr1	587251	587353	587251	587353	AT1TE01900:transposable_element;AT1TE01905:transposable_element;	AT1TE01900:transposable_element;AT1TE01905:transposable_element;	0.104969	0.137921	hyper	hyper	no	no	n/a
Chr5	18738068	18738088	18738068	18738088	Intergenic	Intergenic	0.294605	0.211566	hyper	hyper	no	no	n/a
Chr2	19528753	19528926	19528753	19528995	AT2TE89040:transposable_element;	AT2TE89040:transposable_element;	0.133535	0.195333	hyper	hyper	no	no	n/a
Chr2	12893074	12893110	12893074	12893110	AT2TE56420:transposable_element;	AT2TE56420:transposable_element;	0.179163	0.129315	hyper	hyper	no	no	n/a
Chr5	17266988	17267382	17266988	17267382	AT5TE62400:transposable_element;AT5TE62405:transposable_element;	AT5TE62400:transposable_element;AT5TE62405:transposable_element;	0.216503	0.131827	hyper	hyper	no	no	n/a
Chr4	2467449	2467515	2467449	2467515	AT4TE11510:transposable_element;	AT4TE11510:transposable_element;	0.145878	0.18254	hyper	hyper	no	no	n/a
Chr4	15200581	15200677	15200552	15200789	Intergenic	Intergenic	0.113982	0.14969	hyper	hyper	no	no	n/a
Chr2	14233412	14233645	14233412	14233426	AT2TE62960:transposable_element;	AT2TE62960:transposable_element;	0.181072	0.154944	hyper	hyper	no	no	n/a
Chr3	4745615	4745786	4745428	4745812	Intergenic	Intergenic	0.148362	0.159141	hyper	hyper	no	no	n/a
Chr2	9445257	9445297	9445257	9445297	Intergenic	Intergenic	0.163906	0.241298	hyper	hyper	no	no	n/a
Chr2	7919694	7919920	7919526	7919920	Intergenic	Intergenic	0.199693	0.135419	hyper	hyper	no	no	n/a
Chr1	23190542	23190691	23190431	23190691	Intergenic	Intergenic	0.138246	0.122861	hyper	hyper	no	no	n/a
Chr5	8772961	8773027	8772963	8773027	Intergenic	Intergenic	0.150559	0.149927	hyper	hyper	no	no	n/a
Chr2	9783502	9783550	9783388	9783550	AT2TE41780:transposable_element;	AT2TE41780:transposable_element;	0.17348	0.204586	hyper	hyper	no	no	n/a
Chr5	1518559	1518703	1518493	1518703	Intergenic	Intergenic	0.108726	0.101318	hyper	hyper	no	no	n/a
Chr3	7131864	7132136	7131549	7132431	AT3TE29960:transposable_element;	AT3TE29960:transposable_element;	0.145991	0.251668	hyper	hyper	no	no	n/a
Chr1	22732483	22732632	22732500	22732513	Intergenic	Intergenic	0.117917	0.11495	hyper	hyper	no	no	n/a
Chr4	7611965	7612088	7611965	7612088	Intergenic	Intergenic	0.132151	0.148255	hyper	hyper	no	no	n/a
Chr5	9623279	9623361	9623279	9623361	AT5G27300:CDS;AT5TE34915:transposable_element;	AT5G27300:CDS;AT5TE34915:transposable_element;	0.110882	0.105406	hyper	hyper	no	no	UM
Chr2	19219914	19220028	19220003	19220028	Intergenic	Intergenic	0.109971	0.100392	hyper	hyper	no	no	n/a
Chr4	9860580	9861102	9860477	9861108	AT4TE44740:transposable_element;AT4TE44745:transposable_element;	AT4TE44740:transposable_element;AT4TE44745:transposable_element;	0.119033	0.150503	hyper	hyper	no	no	n/a
Chr2	16957683	16957839	16957373	16957839	AT2TE76340:transposable_element;	AT2TE76340:transposable_element;	0.139797	0.165724	hyper	hyper	no	no	n/a
Chr1	12684713	12684808	12684735	12684846	AT1TE41350:transposable_element;	AT1TE41350:transposable_element;	0.225588	0.261376	hyper	hyper	no	no	n/a
Chr5	15195983	15196241	15195983	15196241	AT5TE54980:transposable_element;	AT5TE54980:transposable_element;	0.102316	0.278268	hyper	hyper	no	no	n/a
Chr1	11325210	11325230	11325119	11325230	AT1TE36630:transposable_element;	AT1TE36630:transposable_element;	0.134762	0.17514	hyper	hyper	no	no	n/a
Chr1	22985048	22985079	22984959	22985079	Intergenic	Intergenic	0.104133	0.165074	hyper	hyper	no	no	n/a
Chr5	19823547	19823877	19823875	19823991	AT5TE71350:transposable_element;AT5TE71355:transposable_element;	AT5TE71350:transposable_element;AT5TE71355:transposable_element;	0.103198	0.114963	hyper	hyper	no	no	n/a
Chr5	15006563	15006664	15006086	15006661	AT5TE54140:transposable_element;AT5TE54145:transposable_element;	AT5G37780:CDS,five_prime_UTR;AT5TE54140:transposable_element;AT5TE54145:transposable_element;	0.113454	0.147306	hyper	hyper	no	no	UM
Chr1	20462886	20462969	20462886	20462969	Intergenic	Intergenic	0.160673	0.115635	hyper	hyper	no	no	n/a
Chr5	13441483	13441510	13441232	13441510	Intergenic	Intergenic	0.141349	0.250104	hyper	hyper	no	no	n/a
Chr4	16929315	16929523	16929315	16929523	Intergenic	Intergenic	0.101616	0.142969	hyper	hyper	no	no	n/a
Chr3	9458850	9459168	9458950	9459168	AT3G25850:CDS;	AT3G25850:CDS;	0.113642	0.116279	hyper	hyper	no	no	UM
Chr5	20884400	20884590	20884400	20884590	Intergenic	Intergenic	0.179142	0.229339	hyper	hyper	no	no	n/a
Chr1	29243962	29244038	29243930	29244119	AT1TE95670:transposable_element;	AT1TE95670:transposable_element;	0.121328	0.130374	hyper	hyper	no	no	n/a
Chr5	15402885	15403030	15402632	15403030	AT5TE55710:transposable_element;AT5TE55715:transposable_element;	AT5TE55710:transposable_element;AT5TE55715:transposable_element;	0.151952	0.180677	hyper	hyper	no	no	n/a
Chr2	9470336	9470446	9470290	9470446	Intergenic	Intergenic	0.248545	0.285626	hyper	hyper	no	no	n/a
Chr1	17766224	17766501	17766321	17766501	AT1TE59000:transposable_element;	Intergenic	0.102251	0.106459	hyper	hyper	no	no	n/a
Chr4	15373737	15373861	15373650	15373861	Intergenic	Intergenic	0.170538	0.19199	hyper	hyper	no	no	n/a
Chr4	7490405	7490569	7490270	7490569	AT4TE32660:transposable_element;	AT4TE32660:transposable_element;	0.107794	0.202075	hyper	hyper	no	no	n/a
Chr1	2907070	2907175	2907070	2907261	AT1G09026:CDS;	AT1G09026:CDS;	0.121894	0.137005	hyper	hyper	no	no	UM
Chr2	3287077	3287163	3287077	3287163	Intergenic	Intergenic	0.231125	0.372782	hyper	hyper	no	no	n/a
Chr5	13368481	13368780	13368481	13368780	AT5TE47365:transposable_element;AT5TE47370:transposable_element;AT5TE47375:transposable_element;	AT5TE47365:transposable_element;AT5TE47370:transposable_element;AT5TE47375:transposable_element;	0.102745	0.15992	hyper	hyper	no	no	n/a
Chr5	6448002	6448176	6447513	6448045	AT5G19172:three_prime_UTR;AT5TE23315:transposable_element;	AT5TE23310:transposable_element;AT5TE23315:transposable_element;	0.148812	0.236431	hyper	hyper	no	no	UM
Chr5	19607855	19607871	19607855	19607871	Intergenic	Intergenic	0.22842	0.281148	hyper	hyper	no	no	n/a
Chr5	18239314	18239354	18239314	18239354	Intergenic	Intergenic	0.108666	0.140329	hyper	hyper	no	no	n/a
Chr5	19014862	19014972	19014862	19014972	Intergenic	Intergenic	0.105185	0.106822	hyper	hyper	no	no	n/a
Chr2	12886394	12886603	12886255	12886643	Intergenic	Intergenic	0.105943	0.127109	hyper	hyper	no	no	n/a
Chr1	18606106	18606159	18606106	18606159	AT1TE61660:transposable_element;	AT1TE61660:transposable_element;	0.103442	0.142488	hyper	hyper	no	no	n/a
Chr1	15935485	15935503	15935393	15935503	AT1TE52520:transposable_element;	AT1TE52520:transposable_element;	0.14456	0.14285	hyper	hyper	no	no	n/a
Chr5	19024271	19024288	19024271	19024314	AT5TE68445:transposable_element;	AT5TE68445:transposable_element;	0.127522	0.163518	hyper	hyper	no	no	n/a
Chr1	1976720	1976782	1976571	1976782	AT1TE06480:transposable_element;	AT1TE06480:transposable_element;	0.119719	0.129607	hyper	hyper	no	no	n/a
Chr1	22024631	22024699	22024518	22024997	Intergenic	Intergenic	0.165262	0.322704	hyper	hyper	no	no	n/a
Chr4	7292747	7292889	7292458	7292891	AT4TE31745:transposable_element;	AT4TE31745:transposable_element;	0.112927	0.115085	hyper	hyper	no	no	n/a
Chr2	11119620	11119722	11119620	11119722	AT2TE47970:transposable_element;	AT2TE47970:transposable_element;	0.263336	0.348228	hyper	hyper	no	no	n/a
Chr4	12302973	12303082	12302973	12303082	AT4TE57160:transposable_element;	AT4TE57160:transposable_element;	0.119797	0.188211	hyper	hyper	no	no	n/a
Chr2	6548521	6548534	6548216	6548687	Intergenic	Intergenic	0.1105	0.211879	hyper	hyper	no	no	n/a
Chr1	11740559	11740622	11740431	11740622	Intergenic	Intergenic	0.112124	0.144892	hyper	hyper	no	no	n/a
Chr3	18047861	18047902	18047832	18048045	AT3G48720:CDS;AT3TE73165:transposable_element;	AT3G48720:CDS;AT3TE73165:transposable_element;	0.126404	0.159542	hyper	hyper	no	no	UM
Chr1	16139271	16139457	16139372	16139457	AT1TE53145:transposable_element;	AT1TE53145:transposable_element;	0.139391	0.15386	hyper	hyper	no	no	n/a
Chr5	14754252	14754509	14753909	14754369	AT5TE53185:transposable_element;AT5TE53190:transposable_element;	AT5TE53185:transposable_element;AT5TE53190:transposable_element;	0.145066	0.164292	hyper	hyper	no	no	n/a
Chr3	11272881	11273023	11272762	11273311	AT3TE46985:transposable_element;	AT3TE46985:transposable_element;AT3TE46990:transposable_element;	0.130812	0.179803	hyper	hyper	no	no	n/a
Chr1	781898	781923	781714	781923	AT1TE02540:transposable_element;	AT1TE02540:transposable_element;	0.122214	0.199761	hyper	hyper	no	no	n/a
Chr4	8305914	8306209	8305914	8306228	AT4TE36805:transposable_element;	AT4TE36805:transposable_element;	0.205912	0.187405	hyper	hyper	no	no	n/a
Chr1	11526554	11527035	11526554	11526779	AT1TE37305:transposable_element;	AT1TE37305:transposable_element;	0.1437	0.190536	hyper	hyper	no	no	n/a
Chr3	5815959	5815976	5815959	5815976	AT3G17050:transposable_element_gene;AT3TE24455:transposable_element;	AT3G17050:transposable_element_gene;AT3TE24455:transposable_element;	0.103099	0.11098	hyper	hyper	no	no	n/a
Chr1	18029462	18029481	18029462	18029481	Intergenic	Intergenic	0.200649	0.174455	hyper	hyper	no	no	n/a
Chr1	3062245	3062257	3062245	3062257	Intergenic	Intergenic	0.117296	0.104837	hyper	hyper	no	no	n/a
Chr5	10026042	10026054	10025984	10026161	Intergenic	AT5TE36495:transposable_element;	0.138106	0.181284	hyper	hyper	no	no	n/a
Chr3	7945788	7945859	7945788	7945859	Intergenic	Intergenic	0.158584	0.178338	hyper	hyper	no	no	n/a
Chr5	7344421	7344516	7344309	7344739	AT5G22150:CDS;AT5TE26550:transposable_element;	AT5G22150:CDS;AT5TE26550:transposable_element;	0.138229	0.17321	hyper	hyper	no	no	UM
Chr2	6089719	6089760	6089664	6089931	Intergenic	Intergenic	0.10821	0.15457	hyper	hyper	no	no	n/a
Chr3	8247532	8247643	8247293	8247835	AT3TE34580:transposable_element;	AT3TE34580:transposable_element;	0.13425	0.151952	hyper	hyper	no	no	n/a
Chr1	18033643	18033721	18033581	18033645	AT1TE59800:transposable_element;	AT1TE59800:transposable_element;	0.147834	0.170165	hyper	hyper	no	no	n/a
Chr1	6074821	6074851	6074635	6074851	AT1TE19635:transposable_element;	AT1TE19635:transposable_element;	0.151018	0.247646	hyper	hyper	no	no	n/a
Chr4	5932526	5932727	5932526	5932727	AT4TE24995:transposable_element;AT4TE25000:transposable_element;	AT4TE24995:transposable_element;AT4TE25000:transposable_element;	0.111035	0.186525	hyper	hyper	no	no	n/a
Chr5	23309746	23309777	23309746	23309777	Intergenic	Intergenic	0.174417	0.154145	hyper	hyper	no	no	n/a
Chr4	1509563	1509576	1509402	1509576	Intergenic	Intergenic	0.144294	0.203731	hyper	hyper	no	no	n/a
Chr2	16329910	16330019	16329886	16330019	Intergenic	Intergenic	0.110341	0.177425	hyper	hyper	no	no	n/a
Chr3	20024518	20024623	20024303	20024661	AT3TE81365:transposable_element;	AT3TE81365:transposable_element;	0.123806	0.238214	hyper	hyper	no	no	n/a
Chr1	12329514	12329574	12329367	12329659	AT1TE40090:transposable_element;	AT1TE40090:transposable_element;	0.123424	0.210657	hyper	hyper	no	no	n/a
Chr3	20285969	20285979	20285875	20285979	Intergenic	Intergenic	0.161087	0.19793	hyper	hyper	no	no	n/a
Chr1	21277160	21277180	21277117	21277180	Intergenic	AT1G56900:tRNA;	0.229078	0.276171	hyper	hyper	no	no	n/a
Chr1	193914	193920	193914	193920	AT1TE00600:transposable_element;	AT1TE00600:transposable_element;	0.114875	0.120106	hyper	hyper	no	no	n/a
Chr4	10189361	10189449	10189259	10189364	Intergenic	Intergenic	0.156735	0.233522	hyper	hyper	no	no	n/a
Chr1	20362722	20362734	20362437	20362734	AT1TE67280:transposable_element;	AT1G54510:five_prime_UTR;AT1TE67280:transposable_element;	0.119161	0.133597	hyper	hyper	no	no	CG-gbm
Chr5	26258387	26258401	26258387	26258660	Intergenic	AT5G65676:transposable_element_gene;AT5TE94550:transposable_element;AT5TE94555:transposable_element;	0.106116	0.113392	hyper	hyper	no	no	n/a
Chr4	6831126	6831352	6830988	6831352	AT4TE29395:transposable_element;	AT4TE29395:transposable_element;	0.185681	0.279099	hyper	hyper	no	no	n/a
Chr3	7847750	7847798	7847750	7847798	Intergenic	Intergenic	0.130348	0.158063	hyper	hyper	no	no	n/a
Chr4	5857569	5857604	5857461	5857959	Intergenic	AT4TE24660:transposable_element;	0.189867	0.371576	hyper	hyper	no	no	n/a
Chr2	11619785	11619796	11619785	11619883	Intergenic	Intergenic	0.168141	0.188179	hyper	hyper	no	no	n/a
Chr4	1541044	1541140	1541044	1541188	AT4TE07840:transposable_element;	AT4TE07840:transposable_element;	0.12074	0.20981	hyper	hyper	no	no	n/a
Chr3	2617103	2617170	2617079	2617170	Intergenic	Intergenic	0.101578	0.127612	hyper	hyper	no	no	n/a
Chr1	7665603	7665606	7665603	7665653	Intergenic	Intergenic	0.125313	0.159152	hyper	hyper	no	no	n/a
Chr1	20187816	20187864	20187692	20187930	Intergenic	Intergenic	0.136705	0.146123	hyper	hyper	no	no	n/a
Chr4	378830	378833	378830	378833	Intergenic	Intergenic	0.123617	0.142292	hyper	hyper	no	no	n/a
Chr1	17103239	17103280	17102972	17103957	AT1TE56585:transposable_element;	AT1TE56585:transposable_element;AT1TE56590:transposable_element;	0.133751	0.214807	hyper	hyper	no	no	n/a
Chr5	2650582	2651099	2650870	2650990	AT5G08240:three_prime_UTR;	AT5G08240:three_prime_UTR;	0.130307	-0.101723	hyper	hypo	no	no	UM
Chr3	18244174	18244565	18244174	18244325	AT3TE74020:transposable_element;	AT3TE74020:transposable_element;	0.192655	-0.121997	hyper	hypo	no	no	n/a
Chr5	14566393	14566856	14566713	14566856	Intergenic	Intergenic	0.139784	-0.146737	hyper	hypo	no	no	n/a
Chr3	6336218	6336483	6336043	6336220	AT3TE26660:transposable_element;	AT3TE26660:transposable_element;	0.182504	-0.138771	hyper	hypo	no	no	n/a
Chr1	8723007	8723086	8723007	8723086	Intergenic	Intergenic	0.225129	-0.109633	hyper	hypo	no	no	n/a
Chr1	20569089	20569306	20568964	20569191	AT1G55120:three_prime_UTR,CDS;	AT1G55120:three_prime_UTR,CDS;	0.166152	-0.145691	hyper	hypo	no	no	CHH-gene
Chr5	18809027	18809265	18809027	18809152	Intergenic	Intergenic	0.124941	-0.150037	hyper	hypo	no	no	n/a
Chr5	5442493	5442658	5442656	5442939	AT5TE19690:transposable_element;	AT5TE19690:transposable_element;	0.171203	-0.113473	hyper	hypo	no	no	n/a
Chr5	9161035	9161231	9160976	9161114	Intergenic	Intergenic	0.136548	-0.148923	hyper	hypo	no	no	n/a
Chr2	11177448	11177628	11177378	11177507	Intergenic	Intergenic	0.107705	-0.136177	hyper	hypo	no	no	n/a
Chr3	4635712	4635885	4635712	4635885	Intergenic	Intergenic	0.176382	-0.232568	hyper	hypo	no	no	n/a
Chr3	132381	132419	132381	132673	Intergenic	Intergenic	0.20721	-0.189911	hyper	hypo	no	no	n/a
ChrM	290916	292555			no match		0.325526		hyper		no		n/a
Chr1	3909977	3910348			AT1TE12715:transposable_element;AT1TE12720:transposable_element;		0.118262		hyper		no		n/a
ChrM	102400	102866			no match		0.205616		hyper		no		n/a
Chr1	27119892	27120593			AT1G72080:three_prime_UTR,CDS;		0.132946		hyper		no		UM
Chr1	19634571	19635288			AT1TE64940:transposable_element;		0.148859		hyper		no		n/a
Chr1	24584504	24584657			AT1G66040:CDS;		0.164868		hyper		no		UM
Chr1	8497306	8498135			Intergenic		0.106808		hyper		no		n/a
Chr3	19142509	19143336			AT3TE77645:transposable_element;		0.166463		hyper		no		n/a
Chr2	291509	291808			AT2G01660:three_prime_UTR,CDS;AT2TE01195:transposable_element;		0.157439		hyper		no		UM
Chr1	6455085	6455763			AT1TE20925:transposable_element;		0.13854		hyper		no		n/a
Chr3	15886446	15887281			AT3TE64280:transposable_element;AT3TE64285:transposable_element;AT3TE64290:transposable_element;		0.166692		hyper		no		n/a
Chr4	748814	749215			Intergenic		0.114088		hyper		no		n/a
Chr1	23160773	23161017			AT1G62560:CDS;AT1TE76345:transposable_element;		0.121352		hyper		no		UM
Chr5	507460	507918			Intergenic		0.180563		hyper		no		n/a
Chr1	28280181	28280606			AT1TE92540:transposable_element;		0.116275		hyper		no		n/a
Chr3	15951575	15951863			AT3TE64550:transposable_element;		0.120951		hyper		no		n/a
ChrM	158008	158189			no match		0.148467		hyper		no		n/a
Chr3	7898562	7898888			AT3TE33130:transposable_element;		0.104757		hyper		no		n/a
Chr1	24741926	24742314			AT1TE81275:transposable_element;		0.222428		hyper		no		n/a
Chr5	8802919	8803253			AT5TE31850:transposable_element;AT5TE31855:transposable_element;		0.170606		hyper		no		n/a
Chr4	6940793	6941192			AT4TE29940:transposable_element;		0.22328		hyper		no		n/a
Chr1	19861751	19861905			Intergenic		0.208696		hyper		no		n/a
Chr2	7889733	7890088			AT2TE32655:transposable_element;		0.261628		hyper		no		n/a
Chr5	9195412	9195452			AT5TE33250:transposable_element;		0.35133		hyper		no		n/a
Chr5	17260978	17261495			AT5G43035:transposable_element_gene;AT5TE62380:transposable_element;AT5TE62385:transposable_element;		0.145448		hyper		no		n/a
Chr5	8583404	8583827			Intergenic		0.120566		hyper		no		n/a
Chr1	12894607	12895019			AT1TE41975:transposable_element;AT1TE41980:transposable_element;AT1TE41985:transposable_element;		0.125125		hyper		no		n/a
Chr4	5763330	5764187			AT4TE24185:transposable_element;AT4TE24190:transposable_element;		0.148773		hyper		no		n/a
Chr5	20640191	20640245			AT5TE74350:transposable_element;		0.289259		hyper		no		n/a
Chr5	17826430	17826785			AT5TE64380:transposable_element;		0.232016		hyper		no		n/a
Chr5	16023613	16023719			AT5G40020:CDS;		0.120894		hyper		no		UM
Chr2	14920762	14921022			Intergenic		0.184234		hyper		no		n/a
Chr4	13681276	13681614			AT4TE64440:transposable_element;		0.100663		hyper		no		n/a
Chr3	7502512	7502914			AT3TE31510:transposable_element;		0.19816		hyper		no		n/a
Chr1	7241541	7241710			AT1TE23395:transposable_element;		0.126288		hyper		no		n/a
Chr5	15253006	15253075			Intergenic		0.205661		hyper		no		n/a
Chr5	7260949	7261288			Intergenic		0.214532		hyper		no		n/a
Chr2	11834723	11834985			AT2TE51470:transposable_element;AT2TE51475:transposable_element;		0.138869		hyper		no		n/a
Chr3	11384829	11385049			AT3TE47485:transposable_element;		0.111899		hyper		no		n/a
Chr1	640541	641158			AT1TE02075:transposable_element;		0.197976		hyper		no		n/a
ChrM	61030	61282			no match		0.15304		hyper		no		n/a
Chr2	8910581	8911112			Intergenic		0.153815		hyper		no		n/a
Chr5	21347689	21347978			Intergenic		0.127693		hyper		no		n/a
Chr1	12483473	12483824			AT1G34250:transposable_element_gene;AT1TE40640:transposable_element;AT1TE40645:transposable_element;		0.157423		hyper		no		n/a
Chr3	19544794	19545057			AT3TE79360:transposable_element;AT3TE79365:transposable_element;		0.132092		hyper		no		n/a
Chr2	10628667	10628937			Intergenic		0.102731		hyper		no		n/a
Chr3	11742343	11742985			AT3TE48895:transposable_element;		0.14078		hyper		no		n/a
Chr1	21230558	21230649			Intergenic		0.168542		hyper		no		n/a
Chr3	8126060	8126477			AT3TE34085:transposable_element;AT3TE34090:transposable_element;AT3TE34095:transposable_element;		0.115456		hyper		no		n/a
Chr5	6384247	6384529			AT5TE23120:transposable_element;AT5TE23125:transposable_element;		0.294642		hyper		no		n/a
Chr1	24251059	24251279			Intergenic		0.129324		hyper		no		n/a
Chr1	25274582	25274948			AT1TE82940:transposable_element;		0.109601		hyper		no		n/a
Chr1	8812877	8813110			AT1G25097:CDS;AT1G25098:ncRNA;		0.285868		hyper		no		UM
Chr5	19821193	19821338			Intergenic		0.337929		hyper		no		n/a
Chr1	18581198	18581417			Intergenic		0.125934		hyper		no		n/a
Chr5	25770770	25771027			AT5TE92735:transposable_element;		0.137814		hyper		no		n/a
Chr1	28891309	28891403			AT1TE94490:transposable_element;AT1TE94495:transposable_element;		0.107651		hyper		no		n/a
Chr1	14000821	14001052			AT1TE45975:transposable_element;		0.114252		hyper		no		n/a
Chr4	7827706	7827778			AT4TE34330:transposable_element;AT4TE34335:transposable_element;		0.157834		hyper		no		n/a
Chr1	17383977	17384252			Intergenic		0.186115		hyper		no		n/a
Chr1	15166711	15167188			AT1TE49760:transposable_element;AT1TE49765:transposable_element;		0.194585		hyper		no		n/a
Chr5	20119175	20119622			AT5TE72455:transposable_element;AT5TE72460:transposable_element;		0.114965		hyper		no		n/a
Chr1	24384447	24384636			AT1G65585:pseudogene;		0.112684		hyper		no		n/a
Chr4	6475341	6475740			AT4G10465:three_prime_UTR;AT4TE27650:transposable_element;		0.119439		hyper		no		UM
Chr2	11315539	11315914			Intergenic		0.222724		hyper		no		n/a
Chr1	21360303	21360517			AT1TE70520:transposable_element;		0.165324		hyper		no		n/a
Chr1	25033911	25034014			Intergenic		0.152101		hyper		no		n/a
Chr4	9536066	9536282			AT4G16940:CDS;		0.169439		hyper		no		UM
Chr5	17488299	17488497			AT5G43525:CDS;AT5TE63225:transposable_element;		0.120995		hyper		no		CHH-gene
Chr1	19704248	19704391			AT1TE65110:transposable_element;AT1TE65115:transposable_element;		0.137145		hyper		no		n/a
Chr4	17616423	17616496			Intergenic		0.162205		hyper		no		n/a
Chr1	291635	291889			Intergenic		0.10147		hyper		no		n/a
Chr4	17638217	17638373			AT4TE85180:transposable_element;		0.227641		hyper		no		n/a
Chr4	8899397	8899830			AT4TE39800:transposable_element;		0.169419		hyper		no		n/a
Chr2	1050231	1050286			Intergenic		0.123486		hyper		no		n/a
Chr5	15308365	15308495			AT5TE55405:transposable_element;		0.334482		hyper		no		n/a
Chr3	5508809	5508915			AT3TE23150:transposable_element;		0.14657		hyper		no		n/a
Chr1	1287059	1287144			AT1TE04205:transposable_element;		0.101028		hyper		no		n/a
Chr5	20439469	20439911			AT5TE73640:transposable_element;		0.154064		hyper		no		n/a
Chr4	16201151	16201475			Intergenic		0.163947		hyper		no		n/a
Chr1	25973543	25973894			Intergenic		0.109867		hyper		no		n/a
Chr5	20533641	20533938			AT5TE73980:transposable_element;AT5TE73985:transposable_element;		0.127538		hyper		no		n/a
Chr3	13755947	13756368			AT3TE56185:transposable_element;		0.115499		hyper		no		n/a
Chr3	8757649	8757871			AT3TE36720:transposable_element;AT3TE36725:transposable_element;		0.100078		hyper		no		n/a
Chr1	28856088	28856254			AT1TE94380:transposable_element;		0.195729		hyper		no		n/a
Chr2	14065366	14065648			Intergenic		0.171628		hyper		no		n/a
Chr1	22323287	22323519			Intergenic		0.105875		hyper		no		n/a
Chr1	17860828	17861124			AT1TE59280:transposable_element;		0.132346		hyper		no		n/a
Chr1	11427895	11428020			AT1TE36960:transposable_element;		0.213314		hyper		no		n/a
Chr1	20278143	20278178			AT1TE67005:transposable_element;		0.159615		hyper		no		n/a
Chr1	19693206	19693332			AT1TE65080:transposable_element;AT1TE65085:transposable_element;		0.117752		hyper		no		n/a
Chr3	15871844	15871986			Intergenic		0.125339		hyper		no		n/a
Chr1	12581582	12581706			Intergenic		0.222333		hyper		no		n/a
Chr2	892118	892402			Intergenic		0.142839		hyper		no		n/a
Chr1	9564630	9564822			Intergenic		0.100696		hyper		no		n/a
Chr4	6032295	6032411			Intergenic		0.220041		hyper		no		n/a
Chr2	6366152	6366251			AT2TE25935:transposable_element;		0.137639		hyper		no		n/a
Chr4	8110392	8110537			Intergenic		0.117238		hyper		no		n/a
Chr4	1356114	1356210			Intergenic		0.142619		hyper		no		n/a
Chr2	6145720	6145940			AT2G14440:CDS;AT2TE25005:transposable_element;		0.100584		hyper		no		UM
Chr1	3771054	3771085			AT1TE12275:transposable_element;		0.123888		hyper		no		n/a
Chr1	11752047	11752285			AT1G32500:five_prime_UTR;AT1TE38090:transposable_element;		0.105621		hyper		no		UM
Chr4	5366040	5366166			AT4G08450:CDS;AT4TE22380:transposable_element;		0.10075		hyper		no		UM
Chr1	10490625	10490805			AT1TE33905:transposable_element;		0.10299		hyper		no		n/a
Chr2	5740994	5741264			AT2TE23255:transposable_element;		0.279385		hyper		no		n/a
Chr4	9309926	9310208			Intergenic		0.14995		hyper		no		n/a
Chr1	8478028	8478189			AT1TE27360:transposable_element;AT1TE27365:transposable_element;		0.205399		hyper		no		n/a
Chr1	11421814	11421989			AT1TE36940:transposable_element;		0.112046		hyper		no		n/a
Chr3	18812352	18812664			AT3TE76285:transposable_element;		0.134459		hyper		no		n/a
Chr3	1283422	1283803			AT3TE05385:transposable_element;		0.11524		hyper		no		n/a
Chr4	4103954	4104289			AT4TE17770:transposable_element;AT4TE17775:transposable_element;		0.106802		hyper		no		n/a
Chr1	11980229	11980605			AT1TE38775:transposable_element;		0.173418		hyper		no		n/a
Chr1	16307027	16307472			AT1TE53685:transposable_element;AT1TE53690:transposable_element;		0.145753		hyper		no		n/a
Chr2	8437460	8438027			AT2TE35205:transposable_element;		0.158061		hyper		no		n/a
Chr3	18062620	18062985			AT3TE73225:transposable_element;AT3TE73230:transposable_element;		0.182638		hyper		no		n/a
Chr2	6208215	6208496			AT2TE25260:transposable_element;		0.147165		hyper		no		n/a
Chr5	26464736	26464785			AT5TE95310:transposable_element;		0.112421		hyper		no		n/a
Chr4	6563620	6563896			Intergenic		0.116206		hyper		no		n/a
Chr4	18247918	18248171			AT4G39180:mRNA;AT4TE88410:transposable_element;		0.168187		hyper		no		UM
Chr2	7374533	7374797			AT2G16970:CDS;AT2TE30160:transposable_element;AT2TE30165:transposable_element;AT2TE30170:transposable_element;		0.112554		hyper		no		UM
Chr5	22149684	22149930			AT5TE79730:transposable_element;		0.10699		hyper		no		n/a
Chr1	7787835	7787949			AT1TE25040:transposable_element;		0.120544		hyper		no		n/a
Chr5	4946803	4946911			Intergenic		0.112757		hyper		no		n/a
Chr5	23240549	23240652			Intergenic		0.10461		hyper		no		n/a
Chr4	7404734	7404766			AT4TE32245:transposable_element;		0.171877		hyper		no		n/a
Chr5	7473433	7473498			AT5G22500:CDS;		0.115233		hyper		no		UM
Chr5	16901373	16901832			AT5G42265:pseudogene;AT5TE61010:transposable_element;		0.108143		hyper		no		n/a
Chr4	17249407	17249435			Intergenic		0.130823		hyper		no		n/a
Chr2	12985736	12985986			Intergenic		0.14317		hyper		no		n/a
Chr3	18859790	18859902			Intergenic		0.138579		hyper		no		n/a
Chr1	16969146	16969328			Intergenic		0.137914		hyper		no		n/a
Chr4	13418684	13418806			AT4TE63090:transposable_element;		0.170174		hyper		no		n/a
Chr2	7638683	7638881			AT2TE31460:transposable_element;		0.115981		hyper		no		n/a
Chr4	8550854	8551163			AT4TE38020:transposable_element;		0.109445		hyper		no		n/a
Chr2	171736	171952			Intergenic		0.133375		hyper		no		n/a
Chr2	9850219	9850283			AT2G23142:CDS;		0.117461		hyper		no		CHH-gene
Chr5	7478526	7478623			AT5TE27040:transposable_element;		0.102539		hyper		no		n/a
Chr5	2847934	2848194			AT5TE10350:transposable_element;		0.100578		hyper		no		n/a
Chr5	9035681	9035877			Intergenic		0.115655		hyper		no		n/a
Chr1	3360434	3360739			AT1G10250:CDS,five_prime_UTR;AT1G10260:transposable_element_gene;AT1TE10930:transposable_element;AT1TE10935:transposable_element;		0.118801		hyper		no		UM
Chr2	1260353	1260410			AT2G03980:mRNA;AT2TE05720:transposable_element;AT2TE05725:transposable_element;		0.210781		hyper		no		UM
Chr2	5049561	5049607			AT2TE20755:transposable_element;		0.177665		hyper		no		n/a
Chr4	2578310	2578353			AT4TE12075:transposable_element;		0.193966		hyper		no		n/a
Chr2	11056447	11056623			AT2TE47660:transposable_element;		0.33841		hyper		no		n/a
Chr4	9999256	9999400			Intergenic		0.135889		hyper		no		n/a
Chr2	1686775	1686892			Intergenic		0.232652		hyper		no		n/a
Chr2	8166409	8166888			AT2TE33945:transposable_element;		0.151272		hyper		no		n/a
Chr4	16863425	16863554			AT4TE81120:transposable_element;		0.115565		hyper		no		n/a
Chr2	1789513	1789701			AT2TE08255:transposable_element;		0.270091		hyper		no		n/a
Chr4	6344320	6344484			AT4G10170:five_prime_UTR;AT4TE27030:transposable_element;		0.10163		hyper		no		UM
Chr1	11998243	11998718			AT1G33100:CDS;AT1TE38860:transposable_element;AT1TE38865:transposable_element;		0.1113		hyper		no		UM
Chr1	12980373	12980515			AT1TE42335:transposable_element;		0.111431		hyper		no		n/a
Chr5	18717877	18718055			Intergenic		0.120664		hyper		no		n/a
Chr1	14663603	14663684			AT1G39510:transposable_element_gene;AT1TE48225:transposable_element;		0.667598		hyper		no		n/a
Chr5	9553099	9553154			Intergenic		0.160775		hyper		no		n/a
Chr1	24822842	24822852			AT1TE81525:transposable_element;AT1TE81535:transposable_element;		0.248998		hyper		no		n/a
Chr5	15342247	15342316			AT5TE55500:transposable_element;		0.155832		hyper		no		n/a
Chr1	5862968	5863024			AT1TE18955:transposable_element;		0.101841		hyper		no		n/a
Chr3	1951835	1952076			Intergenic		0.315721		hyper		no		n/a
Chr3	16011601	16011636			AT3G44340:three_prime_UTR;		0.149783		hyper		no		CG-gbm
Chr5	23418142	23418213			Intergenic		0.149289		hyper		no		n/a
Chr1	18321422	18321459			AT1G49500:three_prime_UTR;		0.127509		hyper		no		UM
Chr4	16378612	16378681			AT4TE78590:transposable_element;		0.131977		hyper		no		n/a
Chr2	13031915	13032300			Intergenic		0.105574		hyper		no		n/a
Chr2	1927482	1927690			Intergenic		0.130961		hyper		no		n/a
Chr2	17009229	17009287			AT2TE76595:transposable_element;		0.15625		hyper		no		n/a
Chr2	3404173	3404510			Intergenic		0.118476		hyper		no		n/a
Chr3	7658920	7659002			AT3TE32175:transposable_element;		0.118279		hyper		no		n/a
Chr1	8798377	8798540			AT1G25054:five_prime_UTR;		0.129989		hyper		no		UM
Chr5	26670217	26670302			Intergenic		0.130162		hyper		no		n/a
Chr4	2241050	2241299			AT4TE10465:transposable_element;		0.121223		hyper		no		n/a
Chr1	22742868	22743063			AT1TE74985:transposable_element;		0.154726		hyper		no		n/a
Chr4	6067203	6067373			Intergenic		0.108231		hyper		no		n/a
Chr5	5288824	5288871			Intergenic		0.123295		hyper		no		n/a
Chr1	8773637	8773770			Intergenic		0.569796		hyper		no		n/a
Chr5	3310846	3310919			Intergenic		0.276629		hyper		no		n/a
Chr3	10535264	10535289			AT3G28260:CDS;AT3TE43755:transposable_element;		0.105499		hyper		no		UM
Chr2	7090803	7090988			AT2TE28835:transposable_element;		0.171047		hyper		no		n/a
Chr5	90953	90989			Intergenic		0.327816		hyper		no		n/a
Chr2	1947838	1948078			AT2TE08970:transposable_element;		0.196162		hyper		no		n/a
Chr4	1488429	1488594			AT4G03380:CDS;AT4TE07570:transposable_element;		0.122198		hyper		no		UM
Chr5	503108	503155			Intergenic		0.158871		hyper		no		n/a
Chr2	1027633	1027944			AT2TE04580:transposable_element;		0.186635		hyper		no		n/a
Chr3	11089551	11089768			AT3TE46115:transposable_element;		0.177058		hyper		no		n/a
Chr5	15012009	15012044			Intergenic		0.211082		hyper		no		n/a
Chr2	1160931	1160957			Intergenic		0.142521		hyper		no		n/a
Chr4	17426336	17426369			Intergenic		0.173471		hyper		no		n/a
Chr4	7318615	7318805			AT4G12330:CDS;		0.107984		hyper		no		UM
Chr1	26358941	26359094			AT1TE86330:transposable_element;		0.123008		hyper		no		n/a
Chr5	8290662	8290791			AT5TE29980:transposable_element;		0.145322		hyper		no		n/a
Chr2	872113	872382			AT2TE03875:transposable_element;		0.202798		hyper		no		n/a
Chr4	6029884	6029988			Intergenic		0.118062		hyper		no		n/a
Chr3	9713353	9713529			Intergenic		0.157695		hyper		no		n/a
Chr2	5691770	5691819			Intergenic		0.146878		hyper		no		n/a
Chr2	11619278	11619331			Intergenic		0.200714		hyper		no		n/a
Chr2	7963995	7964104			Intergenic		0.119448		hyper		no		n/a
Chr5	8861066	8861199			Intergenic		0.155008		hyper		no		n/a
Chr5	9971909	9972039			AT5TE36290:transposable_element;		0.110776		hyper		no		n/a
Chr5	14253660	14253708			AT5G36220:three_prime_UTR;		0.148764		hyper		no		UM
Chr1	1185359	1185436			AT1TE03865:transposable_element;AT1TE03870:transposable_element;		0.14234		hyper		no		n/a
Chr4	13231138	13231157			AT4TE62130:transposable_element;		0.108693		hyper		no		n/a
Chr4	7353751	7353809			Intergenic		0.167748		hyper		no		n/a
Chr4	16320952	16321014			Intergenic		0.128684		hyper		no		n/a
Chr5	19440117	19440172			Intergenic		0.110166		hyper		no		n/a
Chr1	12214972	12215019			Intergenic		0.181812		hyper		no		n/a
Chr1	18598947	18599018			AT1TE61630:transposable_element;		0.146621		hyper		no		n/a
Chr1	15731180	15731386			Intergenic		0.117721		hyper		no		n/a
Chr3	11593124	11593409			AT3G29762:pseudogene;AT3TE48195:transposable_element;		0.164531		hyper		no		n/a
Chr3	22696440	22696630			AT3G61330:transposable_element_gene;AT3TE92525:transposable_element;		0.239779		hyper		no		n/a
Chr5	17926364	17926422			AT5G44495:CDS;		0.126222		hyper		no		CHH-gene
Chr4	16378072	16378287			AT4TE78590:transposable_element;		0.17415		hyper		no		n/a
Chr2	16083037	16083289			Intergenic		0.169339		hyper		no		n/a
Chr2	10951527	10951544			AT2TE47130:transposable_element;		0.161588		hyper		no		n/a
Chr5	15811851	15811894			AT5TE57080:transposable_element;		0.119487		hyper		no		n/a
Chr1	19212612	19212669			AT1TE63665:transposable_element;		0.126678		hyper		no		n/a
Chr1	11422528	11422616			Intergenic		0.11656		hyper		no		n/a
Chr2	10142930	10143052			Intergenic		0.11155		hyper		no		n/a
Chr2	17205950	17206157			AT2TE77555:transposable_element;		0.162835		hyper		no		n/a
Chr3	3987691	3987722			AT3TE16790:transposable_element;		0.111791		hyper		no		n/a
Chr3	3874548	3874579			AT3G12145:three_prime_UTR;AT3TE16310:transposable_element;		0.154292		hyper		no		UM
Chr4	869657	869758			Intergenic		0.112954		hyper		no		n/a
Chr2	407668	407695			AT2G01900:CDS;		0.113022		hyper		no		UM
Chr5	16753688	16753696			AT5G41835:transposable_element_gene;		0.149056		hyper		no		n/a
Chr3	16193365	16193592			Intergenic		0.133951		hyper		no		n/a
Chr1	22887886	22887966			Intergenic		0.117957		hyper		no		n/a
Chr4	2593006	2593047			AT4TE12140:transposable_element;		0.113575		hyper		no		n/a
Chr3	18243681	18243706			Intergenic		0.136812		hyper		no		n/a
Chr2	384951	385063			AT2TE01590:transposable_element;		0.124646		hyper		no		n/a
Chr4	4882486	4882500			AT4TE20330:transposable_element;		0.137283		hyper		no		n/a
Chr2	10535445	10535553			AT2TE45210:transposable_element;		0.138414		hyper		no		n/a
Chr1	12993526	12993621			AT1TE42370:transposable_element;AT1TE42375:transposable_element;		0.113971		hyper		no		n/a
Chr3	22032800	22032810			AT3TE89720:transposable_element;		0.138829		hyper		no		n/a
Chr2	15448591	15448635			Intergenic		0.10339		hyper		no		n/a
Chr3	105370	105408			Intergenic		0.212233		hyper		no		n/a
Chr1	14163960	14164127			Intergenic		0.186351		hyper		no		n/a
Chr4	6699501	6699511			Intergenic		0.108148		hyper		no		n/a
Chr1	1289246	1289270			AT1G04625:CDS;		0.277717		hyper		no		UM
Chr2	16664987	16665035			AT2TE74910:transposable_element;		0.174597		hyper		no		n/a
Chr5	11672244	11672431			Intergenic		0.389749		hyper		no		n/a
Chr3	16303329	16303388			Intergenic		0.145134		hyper		no		n/a
Chr3	43112	43144			Intergenic		0.276693		hyper		no		n/a
Chr2	6871263	6871273			AT2G15770:CDS;AT2TE27985:transposable_element;		0.122245		hyper		no		CHH-gene
Chr1	8471973	8472037			AT1TE27335:transposable_element;		0.145823		hyper		no		n/a
Chr1	8623679	8623699			AT1TE27810:transposable_element;		0.115506		hyper		no		n/a
Chr1	10159081	10159208			AT1TE32785:transposable_element;		0.192124		hyper		no		n/a
Chr4	18425966	18426132			AT4TE89325:transposable_element;		0.117477		hyper		no		n/a
Chr2	8061063	8061105			AT2TE33465:transposable_element;		0.107416		hyper		no		n/a
Chr2	17904383	17904548			AT2G43050:three_prime_UTR;AT2TE81015:transposable_element;		0.110729		hyper		no		UM
Chr4	5992628	5992765			AT4TE25205:transposable_element;		0.155537		hyper		no		n/a
Chr2	8535117	8535150			Intergenic		0.243988		hyper		no		n/a
Chr3	18645943	18646033			AT3G50301:pseudogene;		0.100446		hyper		no		n/a
Chr3	17249272	17249322			Intergenic		0.108196		hyper		no		n/a
Chr2	13024748	13024785			Intergenic		0.101669		hyper		no		n/a
Chr5	17347112	17347238			Intergenic		0.120754		hyper		no		n/a
Chr3	495877	495967			AT3G02420:three_prime_UTR;AT3TE02110:transposable_element;AT3TE02115:transposable_element;		0.113313		hyper		no		UM
Chr3	8883145	8883245			Intergenic		0.102049		hyper		no		n/a
Chr2	1259770	1259957			AT2G03980:mRNA;AT2TE05715:transposable_element;AT2TE05720:transposable_element;		0.200343		hyper		no		UM
Chr4	10928521	10928620			Intergenic		0.123616		hyper		no		n/a
Chr3	8356637	8356712			Intergenic		0.128726		hyper		no		n/a
Chr4	7230754	7231057			AT4TE31485:transposable_element;		0.109646		hyper		no		n/a
Chr2	3249986	3250081			Intergenic		0.198505		hyper		no		n/a
Chr4	11696099	11696200			Intergenic		0.156825		hyper		no		n/a
Chr1	6715643	6715658			AT1G19410:CDS;		0.122555		hyper		no		CHH-gene
Chr5	13858980	13859090			AT5G35680:five_prime_UTR;		0.164304		hyper		no		UM
Chr2	10558591	10558673			Intergenic		0.124983		hyper		no		n/a
Chr1	21105750	21105816			AT1TE69735:transposable_element;		0.169336		hyper		no		n/a
Chr2	303362	303402			AT2TE01265:transposable_element;		0.168287		hyper		no		n/a
Chr1	24428915	24428931			AT1G65681:CDS;AT1TE80250:transposable_element;		0.124531		hyper		no		UM
Chr2	17905011	17905161			AT2TE81015:transposable_element;		0.124037		hyper		no		n/a
Chr5	8565747	8565767			AT5G24900:CDS;		0.110313		hyper		no		UM
Chr1	11857195	11857291			Intergenic		0.137253		hyper		no		n/a
Chr1	8276109	8276153			Intergenic		0.127289		hyper		no		n/a
Chr3	10065827	10065933			AT3TE41910:transposable_element;		0.137612		hyper		no		n/a
Chr2	1066031	1066071			AT2TE04760:transposable_element;		0.103621		hyper		no		n/a
Chr1	14663206	14663258			AT1G39510:transposable_element_gene;AT1TE48225:transposable_element;		0.676686		hyper		no		n/a
Chr4	18533592	18533626			AT4TE89905:transposable_element;		0.112008		hyper		no		n/a
Chr3	18545254	18545343			AT3TE75240:transposable_element;		0.10455		hyper		no		n/a
Chr2	15597335	15597348			Intergenic		0.100451		hyper		no		n/a
Chr4	6718806	6718827			Intergenic		0.104491		hyper		no		n/a
Chr1	7078046	7078069			Intergenic		0.161881		hyper		no		n/a
Chr2	14290060	14290085			AT2TE63215:transposable_element;		0.106821		hyper		no		n/a
Chr3	18412338	18412375			AT3TE74700:transposable_element;		0.107609		hyper		no		n/a
Chr1	11204213	11204279			AT1TE36210:transposable_element;		0.11978		hyper		no		n/a
Chr3	1692732	1693022			AT3G05725:CDS;		0.136282		hyper		no		CHH-gene
Chr3	10522592	10522674			Intergenic		0.106284		hyper		no		n/a
Chr3	452177	452240			Intergenic		0.146267		hyper		no		n/a
Chr3	7937050	7937139			AT3TE33265:transposable_element;		0.127353		hyper		no		n/a
Chr1	4094378	4094398			AT1TE13310:transposable_element;		0.168451		hyper		no		n/a
Chr1	17606107	17606117			AT1TE58430:transposable_element;		0.190648		hyper		no		n/a
Chr3	7274349	7274735	7274214	7274366	AT3TE30560:transposable_element;	Intergenic	-0.181729	0.119274	hypo	hyper	no	no	n/a
Chr3	7214496	7215207	7214304	7214538	Intergenic	Intergenic	-0.16166	0.108548	hypo	hyper	no	no	n/a
Chr3	20929976	20930505	20929633	20929992	Intergenic	Intergenic	-0.167162	0.111418	hypo	hyper	no	no	n/a
Chr5	17412724	17413058	17412580	17412899	AT5TE62890:transposable_element;	AT5TE62890:transposable_element;	-0.107237	0.113325	hypo	hyper	no	no	n/a
Chr3	3587196	3587459	3587419	3587586	AT3TE15085:transposable_element;	AT3TE15085:transposable_element;	-0.11877	0.103414	hypo	hyper	no	no	n/a
Chr5	349575	349788	349522	349723	AT5TE01230:transposable_element;	Intergenic	-0.235526	0.211269	hypo	hyper	no	no	n/a
Chr4	18411909	18412030	18411673	18411960	Intergenic	Intergenic	-0.161068	0.100327	hypo	hyper	no	no	n/a
Chr5	8160638	8161016	8160358	8161016	AT5TE29530:transposable_element;	AT5TE29530:transposable_element;	-0.126152	0.153627	hypo	hyper	no	no	n/a
Chr3	9179437	9179618	9179437	9179466	AT3TE38340:transposable_element;	AT3TE38340:transposable_element;	-0.12974	0.140077	hypo	hyper	no	no	n/a
Chr1	3825918	3826149	3825918	3826149	AT1TE12430:transposable_element;	AT1TE12430:transposable_element;	-0.205194	0.237115	hypo	hyper	no	no	n/a
Chr1	19055028	19055348	19055200	19055405	AT1TE63140:transposable_element;	AT1TE63140:transposable_element;	-0.124713	0.126987	hypo	hyper	no	no	n/a
Chr5	16607387	16607580	16607411	16607775	AT5G41510:CDS;	AT5G41510:CDS;	-0.100416	0.135831	hypo	hyper	no	no	CHH-gene
Chr5	19043132	19043246	19043132	19043374	Intergenic	Intergenic	-0.277832	0.285628	hypo	hyper	no	no	n/a
Chr4	8776920	8777462	8777444	8777615	AT4G15370:CDS;AT4TE39195:transposable_element;	AT4G15370:CDS;AT4TE39195:transposable_element;	-0.112674	0.109712	hypo	hyper	no	no	UM
Chr4	11634690	11635117	11634831	11635117	AT4TE53740:transposable_element;	AT4TE53740:transposable_element;	-0.107982	0.121681	hypo	hyper	no	no	n/a
Chr1	18282151	18282295	18281898	18282295	Intergenic	AT1TE60585:transposable_element;	-0.143931	0.169446	hypo	hyper	no	no	n/a
Chr2	15722252	15722350	15722126	15722521	Intergenic	Intergenic	-0.102831	0.142552	hypo	hyper	no	no	n/a
Chr1	20194350	20194661	20194350	20194661	AT1TE66725:transposable_element;AT1TE66730:transposable_element;	AT1TE66725:transposable_element;AT1TE66730:transposable_element;	-0.172847	0.170099	hypo	hyper	no	no	n/a
Chr5	14246852	14247037	14246648	14247037	AT5TE50935:transposable_element;	AT5TE50930:transposable_element;AT5TE50935:transposable_element;	-0.102611	0.138524	hypo	hyper	no	no	n/a
Chr1	19219813	19219870	19219813	19219880	AT1TE63680:transposable_element;	AT1TE63680:transposable_element;	-0.118558	0.136664	hypo	hyper	no	no	n/a
Chr3	8245091	8245193	8244873	8245093	Intergenic	Intergenic	-0.124994	0.140963	hypo	hyper	no	no	n/a
Chr4	10839415	10839555	10839553	10839684	AT4TE49680:transposable_element;	AT4TE49680:transposable_element;	-0.104511	0.154497	hypo	hyper	no	no	n/a
Chr5	15006189	15006266	15006086	15006661	AT5G37780:five_prime_UTR;AT5TE54140:transposable_element;	AT5G37780:CDS,five_prime_UTR;AT5TE54140:transposable_element;AT5TE54145:transposable_element;	-0.12741	0.147306	hypo	hyper	no	no	UM
Chr4	1089251	1089433	1089194	1089433	AT4TE05540:transposable_element;	AT4TE05540:transposable_element;	-0.103924	0.191098	hypo	hyper	no	no	n/a
Chr1	12595009	12595695	12594740	12595695	AT1G34460:CDS;	AT1G34460:CDS;	-0.30716	-0.291517	hypo	hypo	no	no	CHH-gene
Chr3	17147158	17147509	17147158	17147784	AT3TE69475:transposable_element;AT3TE69480:transposable_element;AT3TE69485:transposable_element;	AT3TE69475:transposable_element;AT3TE69480:transposable_element;AT3TE69485:transposable_element;AT3TE69490:transposable_element;	-0.320786	-0.283883	hypo	hypo	no	no	n/a
Chr5	17582703	17583234	17582703	17583201	AT5G43755:CDS;	AT5G43755:CDS;	-0.319748	-0.324698	hypo	hypo	no	no	CHH-gene
Chr3	21547594	21548064	21547594	21548093	Intergenic	Intergenic	-0.439326	-0.494477	hypo	hypo	no	no	n/a
Chr5	10613267	10613784	10613211	10613883	AT5TE38690:transposable_element;	AT5TE38690:transposable_element;	-0.126922	-0.105341	hypo	hypo	no	no	n/a
Chr3	557823	557986	557855	557986	Intergenic	Intergenic	-0.323374	-0.284902	hypo	hypo	no	no	n/a
Chr1	27333954	27334249	27333954	27334306	AT1G72580:three_prime_UTR;	AT1G72580:three_prime_UTR;	-0.316079	-0.244627	hypo	hypo	no	no	UM
Chr5	8921184	8921858	8921184	8921915	AT5TE32330:transposable_element;	AT5TE32330:transposable_element;	-0.186793	-0.136383	hypo	hypo	no	no	n/a
Chr1	26425526	26426074	26425601	26425955	Intergenic	Intergenic	-0.18701	-0.169441	hypo	hypo	no	no	n/a
Chr4	5793739	5794158	5793739	5794056	AT4TE24340:transposable_element;	AT4TE24340:transposable_element;	-0.218386	-0.216502	hypo	hypo	no	no	n/a
Chr1	10144561	10144927	10144561	10144927	Intergenic	Intergenic	-0.198222	-0.194607	hypo	hypo	no	no	n/a
Chr4	7611279	7611846	7611325	7611846	AT4TE33290:transposable_element;	AT4TE33290:transposable_element;	-0.192139	-0.223888	hypo	hypo	no	no	n/a
Chr1	25831606	25831923	25831606	25831923	AT1G68780:three_prime_UTR,CDS;	AT1G68780:three_prime_UTR,CDS;	-0.168393	-0.128291	hypo	hypo	no	no	UM
Chr5	21854761	21855511	21854761	21855338	Intergenic	Intergenic	-0.273882	-0.151262	hypo	hypo	no	no	n/a
Chr3	15807854	15808474	15807854	15808111	AT3G44035:transposable_element_gene;AT3TE63900:transposable_element;	Intergenic	-0.149923	-0.113502	hypo	hypo	no	no	n/a
Chr1	25400624	25401327	25401286	25401493	AT1TE83355:transposable_element;	AT1TE83355:transposable_element;	-0.118285	-0.100303	hypo	hypo	no	no	n/a
Chr3	7274349	7274735	7274490	7274729	AT3TE30560:transposable_element;	AT3TE30560:transposable_element;	-0.181729	-0.102685	hypo	hypo	no	no	n/a
Chr2	13094555	13095143	13094436	13095143	AT2G30730:CDS;AT2TE57390:transposable_element;	AT2G30730:CDS;AT2TE57390:transposable_element;	-0.142761	-0.182369	hypo	hypo	no	no	CHH-gene
Chr5	8081586	8082080	8081374	8082095	AT5TE29230:transposable_element;	AT5TE29230:transposable_element;	-0.140141	-0.141413	hypo	hypo	no	no	n/a
Chr3	21509409	21509874	21509409	21509874	Intergenic	Intergenic	-0.379003	-0.347481	hypo	hypo	yes	yes	n/a
Chr4	6179562	6180405	6179666	6180466	AT4TE26165:transposable_element;	Intergenic	-0.124292	-0.103308	hypo	hypo	no	no	n/a
Chr4	7089804	7090139	7089826	7090139	AT4TE30760:transposable_element;	AT4TE30760:transposable_element;	-0.377278	-0.389827	hypo	hypo	no	no	n/a
Chr1	19171484	19172090	19171484	19172090	AT1TE63520:transposable_element;AT1TE63525:transposable_element;	AT1TE63520:transposable_element;AT1TE63525:transposable_element;	-0.138742	-0.190836	hypo	hypo	no	no	n/a
Chr3	16876149	16876698	16876120	16876698	AT3G45910:CDS;	AT3G45910:CDS;	-0.117072	-0.16013	hypo	hypo	no	no	CHH-gene
Chr5	26289348	26289919	26289348	26289713	Intergenic	Intergenic	-0.173296	-0.19021	hypo	hypo	no	no	n/a
Chr5	21155699	21156077	21155699	21156077	Intergenic	Intergenic	-0.263078	-0.290399	hypo	hypo	no	no	n/a
Chr4	2596580	2597061	2596580	2597129	AT4TE12170:transposable_element;AT4TE12175:transposable_element;	AT4TE12170:transposable_element;AT4TE12175:transposable_element;	-0.152741	-0.133196	hypo	hypo	no	no	n/a
Chr1	780903	781560	780903	781385	AT1G03200:three_prime_UTR,CDS;AT1TE02540:transposable_element;	AT1G03200:three_prime_UTR,CDS;AT1TE02540:transposable_element;	-0.148527	-0.161499	hypo	hypo	no	no	CHH-gene
Chr2	1263506	1263677	1263506	1264065	AT2TE05740:transposable_element;AT2TE05745:transposable_element;	AT2TE05740:transposable_element;AT2TE05745:transposable_element;AT2TE05750:transposable_element;	-0.190236	-0.183885	hypo	hypo	no	no	n/a
Chr1	17234272	17234491	17234272	17234390	Intergenic	Intergenic	-0.146088	-0.107147	hypo	hypo	no	no	n/a
Chr3	3755044	3755482	3755042	3755383	AT3TE15825:transposable_element;	AT3TE15825:transposable_element;	-0.140236	-0.137776	hypo	hypo	no	no	n/a
Chr2	10137836	10138543	10137836	10138645	AT2TE43370:transposable_element;	AT2TE43370:transposable_element;	-0.255374	-0.263254	hypo	hypo	no	no	n/a
Chr1	16562326	16562709	16562273	16562558	Intergenic	Intergenic	-0.184581	-0.162478	hypo	hypo	no	no	n/a
Chr2	238758	239053	238758	239053	Intergenic	Intergenic	-0.144127	-0.145214	hypo	hypo	no	no	n/a
Chr5	13357293	13357469	13357293	13357469	Intergenic	Intergenic	-0.152099	-0.124803	hypo	hypo	no	no	n/a
Chr2	8569909	8570357	8569909	8570357	Intergenic	Intergenic	-0.276123	-0.225824	hypo	hypo	no	no	n/a
Chr1	3762718	3763012	3762718	3762848	AT1TE12230:transposable_element;AT1TE12235:transposable_element;AT1TE12240:transposable_element;	AT1TE12230:transposable_element;AT1TE12235:transposable_element;	-0.13899	-0.111536	hypo	hypo	no	no	n/a
Chr3	20808533	20808908	20808533	20808984	Intergenic	Intergenic	-0.132858	-0.257626	hypo	hypo	no	no	n/a
Chr5	706582	706936	706582	706936	AT5TE02565:transposable_element;AT5TE02570:transposable_element;	AT5TE02565:transposable_element;AT5TE02570:transposable_element;	-0.176848	-0.283579	hypo	hypo	no	no	n/a
Chr3	12140602	12140875	12140715	12140875	AT3TE50475:transposable_element;	AT3TE50475:transposable_element;	-0.233406	-0.144434	hypo	hypo	no	no	n/a
Chr5	10458538	10458751	10458538	10458780	Intergenic	Intergenic	-0.180945	-0.146888	hypo	hypo	no	no	n/a
Chr5	7488657	7489061	7488657	7489187	AT5TE27075:transposable_element;AT5TE27080:transposable_element;	AT5TE27075:transposable_element;AT5TE27080:transposable_element;	-0.226507	-0.171051	hypo	hypo	no	no	n/a
Chr1	19415276	19415484	19415276	19415383	AT1TE64310:transposable_element;	AT1TE64310:transposable_element;	-0.192382	-0.120898	hypo	hypo	no	no	n/a
Chr3	10517441	10517610	10517441	10517666	Intergenic	Intergenic	-0.157449	-0.152334	hypo	hypo	no	no	n/a
Chr5	20659764	20660155	20659764	20659958	Intergenic	Intergenic	-0.138426	-0.130106	hypo	hypo	no	no	n/a
Chr4	13536497	13536916	13536585	13536749	AT4TE63690:transposable_element;AT4TE63695:transposable_element;	AT4TE63690:transposable_element;AT4TE63695:transposable_element;	-0.134203	-0.116079	hypo	hypo	no	no	n/a
Chr4	8030085	8030357	8030127	8030258	AT4G13885:CDS;	AT4G13885:CDS;	-0.122067	-0.113174	hypo	hypo	no	no	CHH-gene
Chr1	18437495	18437595	18437495	18437595	AT1TE61110:transposable_element;	AT1TE61110:transposable_element;	-0.267888	-0.156453	hypo	hypo	no	no	n/a
Chr5	14256270	14256511	14256174	14256511	AT5G36223:transposable_element_gene;	AT5G36223:transposable_element_gene;	-0.160275	-0.130185	hypo	hypo	no	no	n/a
Chr5	16753993	16754180	16754051	16754091	Intergenic	Intergenic	-0.247846	-0.126804	hypo	hypo	no	no	n/a
Chr1	11422127	11422263	11422127	11422263	AT1TE36945:transposable_element;	AT1TE36945:transposable_element;	-0.249268	-0.118131	hypo	hypo	no	no	n/a
Chr5	91240	91301	91240	91301	Intergenic	Intergenic	-0.396815	-0.247455	hypo	hypo	no	no	n/a
Chr2	429233	429381	429233	429331	AT2TE01790:transposable_element;	AT2TE01790:transposable_element;	-0.187999	-0.264368	hypo	hypo	no	no	n/a
Chr4	721593	721834	721593	721834	Intergenic	Intergenic	-0.182423	-0.158153	hypo	hypo	no	no	n/a
Chr4	12110056	12110471	12110056	12110471	AT4TE56160:transposable_element;	AT4TE56160:transposable_element;	-0.299554	-0.216288	hypo	hypo	no	no	n/a
Chr1	8282978	8283131	8282978	8283131	Intergenic	Intergenic	-0.130415	-0.164033	hypo	hypo	no	no	n/a
Chr4	9369315	9369590	9369315	9369520	AT4TE42280:transposable_element;	AT4TE42280:transposable_element;	-0.229656	-0.164445	hypo	hypo	no	no	n/a
Chr4	16921155	16921299	16921155	16921299	Intergenic	Intergenic	-0.238258	-0.260632	hypo	hypo	no	no	n/a
Chr4	10248043	10248304	10248043	10248304	AT4TE46700:transposable_element;	AT4TE46700:transposable_element;	-0.260274	-0.241144	hypo	hypo	no	no	n/a
Chr4	1063663	1063851	1063663	1063826	Intergenic	Intergenic	-0.277904	-0.299961	hypo	hypo	no	no	n/a
Chr3	22076189	22076568	22076041	22076280	AT3G59765:ncRNA;AT3TE89880:transposable_element;	Intergenic	-0.166862	-0.14429	hypo	hypo	no	no	n/a
Chr5	10654270	10654675	10654270	10654718	AT5G28642:CDS;	AT5G28642:CDS;	-0.12849	-0.128533	hypo	hypo	no	no	CHH-gene
Chr5	9552304	9552510	9552019	9552510	AT5TE34700:transposable_element;	AT5TE34700:transposable_element;	-0.227355	-0.247723	hypo	hypo	no	no	n/a
Chr1	10206972	10207094	10206972	10207094	AT1TE32945:transposable_element;	AT1TE32945:transposable_element;	-0.14615	-0.138137	hypo	hypo	no	no	n/a
Chr3	9335573	9335711	9335573	9335602	Intergenic	Intergenic	-0.276135	-0.150253	hypo	hypo	no	no	n/a
Chr3	20746610	20746775	20746557	20746810	AT3G55930:CDS;	AT3G55930:CDS;	-0.170482	-0.265985	hypo	hypo	no	no	CHH-gene
Chr5	16003770	16004060	16003854	16004013	AT5TE57775:transposable_element;	AT5TE57775:transposable_element;	-0.126458	-0.102931	hypo	hypo	no	no	n/a
Chr1	12302835	12302980	12302835	12302915	AT1TE40010:transposable_element;	Intergenic	-0.163294	-0.111072	hypo	hypo	no	no	n/a
Chr1	9812257	9812333	9812257	9812333	Intergenic	Intergenic	-0.29523	-0.33381	hypo	hypo	no	no	n/a
Chr4	2335545	2335816	2335616	2335876	Intergenic	Intergenic	-0.136724	-0.105696	hypo	hypo	no	no	n/a
Chr3	16775249	16775598	16775249	16775598	AT3TE67965:transposable_element;	AT3TE67965:transposable_element;	-0.184415	-0.172775	hypo	hypo	no	no	n/a
Chr4	7956524	7956776	7956524	7956776	AT4TE35000:transposable_element;AT4TE35005:transposable_element;	AT4TE35000:transposable_element;AT4TE35005:transposable_element;	-0.146862	-0.197644	hypo	hypo	no	no	n/a
Chr3	17707518	17707699	17707518	17707699	AT3TE71730:transposable_element;	AT3TE71730:transposable_element;	-0.202967	-0.382819	hypo	hypo	no	no	n/a
Chr2	5113116	5113848	5113116	5113848	AT2TE20975:transposable_element;	AT2TE20975:transposable_element;	-0.195667	-0.18291	hypo	hypo	no	no	n/a
Chr3	19219307	19219558	19219433	19219558	AT3TE77985:transposable_element;	AT3TE77985:transposable_element;	-0.108937	-0.101073	hypo	hypo	no	no	n/a
Chr1	12851169	12851521	12851169	12851605	AT1TE41825:transposable_element;	AT1TE41825:transposable_element;	-0.119684	-0.134254	hypo	hypo	no	no	n/a
Chr4	12484273	12484641	12484383	12484641	AT4TE58120:transposable_element;	Intergenic	-0.155099	-0.149842	hypo	hypo	no	no	n/a
Chr2	8568375	8568580	8568197	8568667	AT2G19850:five_prime_UTR;	AT2G19850:five_prime_UTR;	-0.14714	-0.213181	hypo	hypo	no	no	UM
ChrM	68467	68595	68448	68595	no match	no match	-0.109219	-0.12266	hypo	hypo	no	no	n/a
Chr1	17381053	17381281	17381053	17381281	Intergenic	Intergenic	-0.102423	-0.102868	hypo	hypo	no	no	n/a
Chr4	6846441	6846592	6846441	6846526	AT4TE29470:transposable_element;	AT4TE29470:transposable_element;	-0.150642	-0.17385	hypo	hypo	no	no	n/a
Chr5	12820861	12821261	12820861	12821261	AT5TE45425:transposable_element;AT5TE45430:transposable_element;	AT5TE45425:transposable_element;AT5TE45430:transposable_element;	-0.151096	-0.16521	hypo	hypo	no	no	n/a
Chr2	10944264	10944492	10944185	10944346	Intergenic	Intergenic	-0.149862	-0.190461	hypo	hypo	no	no	n/a
Chr4	379148	379279	379264	379279	Intergenic	Intergenic	-0.273917	-0.247714	hypo	hypo	no	no	n/a
Chr5	17221267	17221464	17221267	17221464	AT5TE62220:transposable_element;	AT5TE62220:transposable_element;	-0.331578	-0.208602	hypo	hypo	no	no	n/a
Chr5	16240188	16240593	16240404	16240593	Intergenic	Intergenic	-0.132787	-0.103628	hypo	hypo	no	no	n/a
Chr2	11963849	11964378	11963872	11964695	AT2TE52075:transposable_element;AT2TE52080:transposable_element;	AT2TE52075:transposable_element;AT2TE52080:transposable_element;	-0.118496	-0.128077	hypo	hypo	no	no	n/a
Chr2	9432532	9432642	9432532	9432642	Intergenic	Intergenic	-0.144638	-0.167715	hypo	hypo	no	no	n/a
Chr5	20527610	20527830	20527610	20527832	AT5TE73965:transposable_element;	AT5TE73965:transposable_element;	-0.101099	-0.162312	hypo	hypo	no	no	n/a
Chr2	13808019	13808312	13808019	13808312	Intergenic	Intergenic	-0.200901	-0.17845	hypo	hypo	no	no	n/a
Chr2	7364005	7364125	7364005	7364057	Intergenic	Intergenic	-0.130487	-0.123576	hypo	hypo	no	no	n/a
Chr1	1286761	1286978	1286761	1286978	AT1TE04205:transposable_element;	AT1TE04205:transposable_element;	-0.139505	-0.141169	hypo	hypo	no	no	n/a
Chr4	13336788	13337023	13336652	13337023	AT4TE62680:transposable_element;	AT4TE62680:transposable_element;	-0.141512	-0.121554	hypo	hypo	no	no	n/a
Chr3	11387370	11387582	11387271	11387669	Intergenic	Intergenic	-0.121796	-0.110434	hypo	hypo	no	no	n/a
Chr3	9232645	9232742	9232612	9232768	AT3G25460:CDS;	AT3G25460:CDS;	-0.142646	-0.113757	hypo	hypo	no	no	CHH-gene
Chr4	7852994	7853173	7853046	7853173	AT4TE34490:transposable_element;	AT4TE34490:transposable_element;	-0.171875	-0.157825	hypo	hypo	no	no	n/a
Chr5	6751413	6751494	6751377	6751494	Intergenic	Intergenic	-0.160693	-0.170579	hypo	hypo	no	no	n/a
Chr1	21880932	21881149	21880932	21881149	Intergenic	Intergenic	-0.106435	-0.106051	hypo	hypo	no	no	n/a
Chr5	4813679	4814012	4813597	4814012	Intergenic	Intergenic	-0.163862	-0.166483	hypo	hypo	no	no	n/a
Chr2	1113383	1113517	1113383	1113517	AT2TE05030:transposable_element;	AT2TE05030:transposable_element;	-0.251399	-0.167684	hypo	hypo	no	no	n/a
Chr4	12948798	12949127	12948798	12949127	AT4TE60585:transposable_element;AT4TE60590:transposable_element;	AT4TE60585:transposable_element;AT4TE60590:transposable_element;	-0.133131	-0.177574	hypo	hypo	no	no	n/a
Chr2	4871036	4871217	4870783	4871300	Intergenic	Intergenic	-0.120844	-0.180502	hypo	hypo	no	no	n/a
Chr5	24971252	24971472	24971252	24971472	Intergenic	Intergenic	-0.222498	-0.300726	hypo	hypo	no	no	n/a
Chr3	7290914	7291192	7290914	7291192	AT3TE30630:transposable_element;AT3TE30635:transposable_element;	AT3TE30630:transposable_element;AT3TE30635:transposable_element;	-0.151118	-0.168014	hypo	hypo	no	no	n/a
Chr1	7541173	7541299	7541173	7541299	Intergenic	Intergenic	-0.138326	-0.108971	hypo	hypo	no	no	n/a
Chr4	602361	602442	602361	602396	Intergenic	Intergenic	-0.178237	-0.173111	hypo	hypo	no	no	n/a
Chr1	792367	792631	792365	792684	AT1G03240:three_prime_UTR,CDS;	AT1G03240:three_prime_UTR,CDS;	-0.107475	-0.140834	hypo	hypo	no	no	UM
Chr2	16329454	16329669	16329499	16329612	Intergenic	Intergenic	-0.144783	-0.122587	hypo	hypo	no	no	n/a
Chr5	19870503	19870834	19870828	19870955	AT5TE71505:transposable_element;AT5TE71510:transposable_element;	AT5TE71510:transposable_element;	-0.108097	-0.104141	hypo	hypo	no	no	n/a
Chr2	415950	416045	415950	416170	Intergenic	Intergenic	-0.244082	-0.234995	hypo	hypo	no	no	n/a
Chr3	8660024	8660065	8660024	8660065	AT3TE36300:transposable_element;	AT3TE36300:transposable_element;	-0.166372	-0.191693	hypo	hypo	no	no	n/a
Chr3	7232316	7232454	7232316	7232540	AT3G20690:CDS;	AT3G20690:CDS;	-0.106771	-0.106643	hypo	hypo	no	no	CHH-gene
Chr3	18563830	18563960	18563830	18563960	Intergenic	Intergenic	-0.228772	-0.23032	hypo	hypo	no	no	n/a
Chr2	14415398	14415593	14415398	14415562	AT2TE63815:transposable_element;	AT2TE63815:transposable_element;	-0.165916	-0.125318	hypo	hypo	no	no	n/a
Chr1	21127580	21127933	21127580	21127637	AT1TE69830:transposable_element;	AT1TE69830:transposable_element;	-0.175306	-0.120967	hypo	hypo	no	no	n/a
Chr3	1385794	1386089	1385794	1386089	AT3TE05850:transposable_element;AT3TE05855:transposable_element;	AT3TE05850:transposable_element;AT3TE05855:transposable_element;	-0.200292	-0.226157	hypo	hypo	no	no	n/a
Chr5	15043242	15043752	15043453	15043652	AT5TE54320:transposable_element;	AT5TE54320:transposable_element;	-0.138345	-0.107444	hypo	hypo	no	no	n/a
Chr1	18885887	18885977	18885887	18885896	AT1TE62560:transposable_element;	AT1TE62560:transposable_element;	-0.140922	-0.12798	hypo	hypo	no	no	n/a
Chr4	5159288	5159347	5159288	5159347	AT4G08160:three_prime_UTR,CDS;	AT4G08160:three_prime_UTR,CDS;	-0.107167	-0.114732	hypo	hypo	no	no	UM
Chr2	811796	811916	811796	811801	AT2TE03580:transposable_element;	AT2TE03580:transposable_element;	-0.142975	-0.101741	hypo	hypo	no	no	n/a
Chr4	2543255	2543383	2543126	2543383	Intergenic	AT4G04970:three_prime_UTR;AT4TE11900:transposable_element;	-0.165584	-0.141496	hypo	hypo	no	no	CG-gbm
Chr1	1638122	1638291	1638177	1638291	Intergenic	Intergenic	-0.147126	-0.171984	hypo	hypo	no	no	n/a
Chr5	16979272	16979386	16979272	16979386	AT5TE61280:transposable_element;	AT5TE61280:transposable_element;	-0.181158	-0.150305	hypo	hypo	no	no	n/a
Chr3	15982988	15983023	15982988	15983023	AT3TE64705:transposable_element;	AT3TE64705:transposable_element;	-0.17316	-0.156241	hypo	hypo	no	no	n/a
Chr5	25531234	25531492	25531117	25531492	AT5G63800:CDS;AT5TE91840:transposable_element;AT5TE91845:transposable_element;	AT5G63800:CDS;AT5TE91840:transposable_element;AT5TE91845:transposable_element;	-0.130719	-0.11704	hypo	hypo	no	no	UM
Chr5	23282547	23282808	23282547	23282808	AT5TE83715:transposable_element;	AT5TE83715:transposable_element;	-0.206532	-0.201317	hypo	hypo	no	no	n/a
Chr3	21305972	21306466	21305813	21306466	AT3TE86735:transposable_element;	AT3TE86735:transposable_element;	-0.157464	-0.184824	hypo	hypo	no	no	n/a
Chr1	24250853	24250925	24250879	24250925	Intergenic	Intergenic	-0.138134	-0.102687	hypo	hypo	no	no	n/a
Chr1	4583647	4583765	4583647	4583812	AT1TE14870:transposable_element;	AT1TE14870:transposable_element;	-0.18745	-0.204339	hypo	hypo	no	no	n/a
Chr3	21617291	21617347	21616871	21617347	AT3TE88030:transposable_element;	AT3TE88030:transposable_element;	-0.212652	-0.19237	hypo	hypo	no	no	n/a
Chr2	12209084	12209238	12209132	12209238	AT2TE53195:transposable_element;	AT2TE53195:transposable_element;	-0.164011	-0.125179	hypo	hypo	no	no	n/a
Chr5	12821679	12822178	12821679	12822427	AT5TE45435:transposable_element;	AT5TE45435:transposable_element;AT5TE45440:transposable_element;	-0.149453	-0.177005	hypo	hypo	no	no	n/a
Chr2	12106836	12107293	12106836	12106967	AT2TE52730:transposable_element;	AT2TE52730:transposable_element;	-0.175913	-0.16094	hypo	hypo	no	no	n/a
Chr4	10011004	10011076	10011004	10011076	AT4TE45470:transposable_element;	AT4TE45470:transposable_element;	-0.13517	-0.135925	hypo	hypo	no	no	n/a
Chr5	22680443	22680766	22680443	22680766	AT5TE81600:transposable_element;	AT5TE81600:transposable_element;	-0.126408	-0.131218	hypo	hypo	no	no	n/a
Chr4	348445	348518	348445	348518	AT4TE01825:transposable_element;	AT4TE01825:transposable_element;	-0.154022	-0.108238	hypo	hypo	no	no	n/a
Chr2	14682781	14682880	14682825	14682880	AT2TE65130:transposable_element;	AT2TE65130:transposable_element;	-0.22728	-0.161627	hypo	hypo	no	no	n/a
Chr2	216249	216477	216249	216507	AT2TE00850:transposable_element;	AT2TE00850:transposable_element;	-0.182726	-0.172959	hypo	hypo	no	no	n/a
Chr3	3080570	3080640	3080632	3080640	AT3TE12935:transposable_element;AT3TE12940:transposable_element;	AT3TE12940:transposable_element;	-0.171009	-0.133329	hypo	hypo	no	no	n/a
Chr3	19242986	19243067	19242986	19243347	Intergenic	Intergenic	-0.10569	-0.141935	hypo	hypo	no	no	n/a
Chr3	18895921	18896112	18895921	18896112	AT3TE76625:transposable_element;	AT3TE76625:transposable_element;	-0.117053	-0.122177	hypo	hypo	no	no	n/a
Chr3	19391624	19391726	19391624	19391726	Intergenic	Intergenic	-0.118475	-0.112629	hypo	hypo	no	no	n/a
Chr2	6757963	6758198	6757963	6758198	AT2TE27605:transposable_element;	AT2TE27605:transposable_element;	-0.13873	-0.117436	hypo	hypo	no	no	n/a
Chr3	10663877	10664167	10663877	10664359	Intergenic	Intergenic	-0.273359	-0.277242	hypo	hypo	no	no	n/a
Chr1	23907504	23907566	23907504	23907694	Intergenic	Intergenic	-0.214241	-0.242973	hypo	hypo	no	no	n/a
Chr3	7644277	7644381	7644277	7644381	AT3G21700:five_prime_UTR;	AT3G21700:five_prime_UTR;	-0.172874	-0.192626	hypo	hypo	no	no	UM
Chr4	10007855	10008053	10007598	10008053	Intergenic	AT4G18020:five_prime_UTR;	-0.135162	-0.178478	hypo	hypo	no	no	UM
Chr1	17376620	17376957	17376620	17376705	AT1TE57560:transposable_element;	AT1TE57560:transposable_element;	-0.143885	-0.116594	hypo	hypo	no	no	n/a
Chr1	23586367	23586425	23586367	23586570	Intergenic	Intergenic	-0.171214	-0.139513	hypo	hypo	no	no	n/a
Chr1	26335798	26335826	26335811	26335842	Intergenic	Intergenic	-0.13363	-0.131859	hypo	hypo	no	no	n/a
Chr4	5710696	5710756	5710696	5710756	Intergenic	Intergenic	-0.23572	-0.267793	hypo	hypo	no	no	n/a
Chr5	23985022	23985176	23985022	23985176	Intergenic	Intergenic	-0.159589	-0.151803	hypo	hypo	no	no	n/a
Chr2	7161494	7161581	7161494	7161581	AT2TE29150:transposable_element;	AT2TE29150:transposable_element;	-0.244017	-0.186297	hypo	hypo	no	no	n/a
Chr1	20278714	20278841	20278714	20278841	AT1TE67005:transposable_element;AT1TE67010:transposable_element;	AT1TE67005:transposable_element;AT1TE67010:transposable_element;	-0.10735	-0.106568	hypo	hypo	no	no	n/a
Chr2	12144281	12144572	12144570	12144805	AT2TE52900:transposable_element;	AT2TE52900:transposable_element;AT2TE52905:transposable_element;	-0.127104	-0.124631	hypo	hypo	no	no	n/a
Chr1	26185880	26186114	26185822	26186168	Intergenic	Intergenic	-0.127043	-0.209669	hypo	hypo	no	no	n/a
Chr4	848550	848562	848556	848562	Intergenic	Intergenic	-0.226681	-0.210045	hypo	hypo	no	no	n/a
Chr5	21155264	21155290	21155264	21155290	Intergenic	Intergenic	-0.13969	-0.116245	hypo	hypo	no	no	n/a
Chr4	7283993	7284149	7283993	7284238	AT4TE31700:transposable_element;	AT4TE31700:transposable_element;	-0.136148	-0.124205	hypo	hypo	no	no	n/a
Chr5	13677020	13677243	13677020	13677243	AT5TE48670:transposable_element;	AT5TE48670:transposable_element;	-0.196332	-0.160326	hypo	hypo	no	no	n/a
Chr5	23288824	23289073	23288824	23289073	Intergenic	Intergenic	-0.127279	-0.130082	hypo	hypo	no	no	n/a
Chr3	17658543	17658594	17658543	17658594	Intergenic	Intergenic	-0.110142	-0.120081	hypo	hypo	no	no	n/a
Chr2	15791462	15791635	15791608	15791635	Intergenic	Intergenic	-0.121187	-0.126175	hypo	hypo	no	no	n/a
Chr1	18047980	18047983	18047980	18048401	Intergenic	Intergenic	-0.148462	-0.155959	hypo	hypo	no	no	n/a
Chr3	2884016	2884062	2884016	2884062	AT3TE12120:transposable_element;	AT3TE12120:transposable_element;	-0.135967	-0.115974	hypo	hypo	no	no	n/a
Chr1	9939974	9940044	9939974	9940044	Intergenic	Intergenic	-0.116896	-0.149154	hypo	hypo	no	no	n/a
Chr2	10677924	10678073	10677924	10678073	AT2TE45780:transposable_element;	AT2TE45780:transposable_element;	-0.258283	-0.404397	hypo	hypo	no	no	n/a
Chr5	1676759	1676876	1676759	1676898	AT5TE06055:transposable_element;AT5TE06060:transposable_element;	AT5TE06055:transposable_element;AT5TE06060:transposable_element;	-0.106693	-0.133889	hypo	hypo	no	no	n/a
Chr2	11346545	11346604	11346545	11346629	AT2TE49075:transposable_element;	AT2TE49075:transposable_element;	-0.220171	-0.231254	hypo	hypo	no	no	n/a
ChrM	91726	91781	91726	91775	no match	no match	-0.220906	-0.18069	hypo	hypo	no	no	n/a
Chr4	617596	617708	617596	617779	AT4TE03220:transposable_element;	AT4TE03220:transposable_element;AT4TE03225:transposable_element;	-0.104794	-0.104431	hypo	hypo	no	no	n/a
Chr1	17384492	17384529	17384389	17384529	Intergenic	AT1TE57570:transposable_element;	-0.135281	-0.262066	hypo	hypo	no	no	n/a
Chr3	985800	985996	985994	986162	AT3TE04150:transposable_element;	AT3TE04150:transposable_element;	-0.112429	-0.101057	hypo	hypo	no	no	n/a
Chr3	15989503	15989541	15989503	15989541	Intergenic	Intergenic	-0.106626	-0.108004	hypo	hypo	no	no	n/a
Chr5	23592412	23592432	23592412	23592873	Intergenic	Intergenic	-0.171621	-0.297821	hypo	hypo	no	no	n/a
Chr1	5171627	5171672	5171627	5171672	AT1G15010:three_prime_UTR,CDS;	AT1G15010:three_prime_UTR,CDS;	-0.138428	-0.122063	hypo	hypo	no	no	UM
Chr2	9057181	9057208	9057044	9057291	Intergenic	AT2TE38245:transposable_element;	-0.113083	-0.165011	hypo	hypo	no	no	n/a
Chr3	18088942	18088949	18088942	18089153	Intergenic	AT3G48780:five_prime_UTR;	-0.168119	-0.348704	hypo	hypo	no	no	CG-gbm
Chr3	9347509	9347519	9347509	9347780	Intergenic	Intergenic	-0.133959	-0.127843	hypo	hypo	no	no	n/a
Chr2	12243285	12243407	12243285	12243407	Intergenic	Intergenic	-0.1217	-0.157975	hypo	hypo	no	no	n/a
Chr1	20172852	20172861	20172788	20172861	AT1G54040:CDS;AT1TE66645:transposable_element;	AT1G54040:CDS;AT1TE66645:transposable_element;	-0.150733	-0.340297	hypo	hypo	no	no	UM
Chr5	19930975	19931176	19930916	19931176	AT5TE71740:transposable_element;	AT5TE71740:transposable_element;	-0.143643	-0.190793	hypo	hypo	no	no	n/a
Chr5	14921476	14921621	14921263	14921785	Intergenic	Intergenic	-0.103972	-0.154364	hypo	hypo	no	no	n/a
Chr5	18892797	18892847	18892653	18892847	Intergenic	Intergenic	-0.154388	-0.203039	hypo	hypo	no	no	n/a
Chr5	24542933	24543089	24542933	24543089	Intergenic	Intergenic	-0.192705	-0.203578	hypo	hypo	no	no	n/a
Chr1	5357271	5357384	5356803	5357501	AT1TE17315:transposable_element;	AT1TE17315:transposable_element;	-0.106798	-0.12224	hypo	hypo	no	no	n/a
Chr4	6479872	6479902	6479872	6479902	Intergenic	Intergenic	-0.166475	-0.118549	hypo	hypo	no	no	n/a
Chr1	10421064	10421120	10421064	10421284	Intergenic	Intergenic	-0.135071	-0.215385	hypo	hypo	no	no	n/a
Chr4	13808338	13808429	13808338	13808429	Intergenic	Intergenic	-0.133397	-0.136762	hypo	hypo	no	no	n/a
Chr4	729073	729108	728643	729108	Intergenic	Intergenic	-0.154918	-0.213876	hypo	hypo	no	no	n/a
Chr2	10677415	10677472	10677359	10677472	Intergenic	Intergenic	-0.150634	-0.282706	hypo	hypo	no	no	n/a
Chr2	7962362	7962495	7962362	7962495	Intergenic	Intergenic	-0.112334	-0.10983	hypo	hypo	no	no	n/a
Chr1	19744049	19744071	19744049	19744248	AT1TE65255:transposable_element;	AT1TE65255:transposable_element;	-0.173188	-0.177669	hypo	hypo	no	no	n/a
Chr3	9169898	9169968	9169898	9169970	Intergenic	Intergenic	-0.110042	-0.102954	hypo	hypo	no	no	n/a
Chr4	379688	379706	379688	379755	Intergenic	Intergenic	-0.114957	-0.121858	hypo	hypo	no	no	n/a
Chr2	10658282	10658960			AT2G25050:CDS;		-0.130384		hypo		no		CG-gbm
Chr3	9321923	9322518			AT3TE38920:transposable_element;		-0.127156		hypo		no		n/a
Chr4	6977485	6977804			Intergenic		-0.113854		hypo		no		n/a
Chr2	9314443	9315066			AT2TE39520:transposable_element;		-0.201018		hypo		no		n/a
Chr3	8231659	8232063			AT3TE34525:transposable_element;		-0.101363		hypo		no		n/a
Chr1	28051673	28051923			AT1TE91795:transposable_element;		-0.215063		hypo		no		n/a
Chr5	24601733	24601909			AT5G61140:CDS;AT5TE88530:transposable_element;		-0.116744		hypo		no		CG-gbm
Chr4	17249486	17249593			Intergenic		-0.195912		hypo		no		n/a
Chr3	9197430	9197670			Intergenic		-0.179347		hypo		no		n/a
Chr5	15945997	15946211			AT5TE57575:transposable_element;		-0.11733		hypo		no		n/a
Chr5	17113473	17113963			AT5G42677:pseudogene;		-0.119282		hypo		no		n/a
Chr2	1930025	1930548			AT2TE08865:transposable_element;		-0.239205		hypo		no		n/a
Chr3	8138456	8138718			AT3G22955:transposable_element_gene;AT3TE34140:transposable_element;AT3TE34145:transposable_element;		-0.288942		hypo		no		n/a
Chr5	490441	490797			AT5TE01760:transposable_element;		-0.199428		hypo		no		n/a
Chr1	372737	372978			Intergenic		-0.171723		hypo		no		n/a
Chr5	10374316	10374608			Intergenic		-0.111356		hypo		no		n/a
Chr4	1356637	1356827			Intergenic		-0.153425		hypo		no		n/a
Chr4	2332875	2333038			Intergenic		-0.105771		hypo		no		n/a
Chr2	1078800	1079005			AT2TE04835:transposable_element;AT2TE04840:transposable_element;		-0.162465		hypo		no		n/a
Chr5	19391026	19391530			AT5TE69755:transposable_element;		-0.178446		hypo		no		n/a
Chr4	9560683	9560953			AT4G16990:five_prime_UTR;AT4TE43210:transposable_element;		-0.130927		hypo		no		UM
Chr1	9879742	9880002			Intergenic		-0.140342		hypo		no		n/a
Chr5	2956998	2957145			Intergenic		-0.19028		hypo		no		n/a
Chr5	9496926	9497373			AT5TE34475:transposable_element;		-0.103658		hypo		no		n/a
Chr5	3605622	3605897			AT5TE13080:transposable_element;		-0.139505		hypo		no		n/a
Chr5	10278211	10278504			Intergenic		-0.190582		hypo		no		n/a
Chr2	6579915	6580272			AT2G15160:transposable_element_gene;AT2TE26865:transposable_element;AT2TE26875:transposable_element;		-0.116154		hypo		no		n/a
Chr4	6014508	6014871			Intergenic		-0.101885		hypo		no		n/a
Chr1	19888684	19888844			AT1TE65740:transposable_element;		-0.114018		hypo		no		n/a
Chr4	645912	646052			AT4TE03350:transposable_element;		-0.156788		hypo		no		n/a
Chr5	9362631	9363373			AT5TE33945:transposable_element;		-0.106243		hypo		no		n/a
Chr3	22370698	22370751			Intergenic		-0.212862		hypo		no		n/a
Chr1	12483061	12483246			AT1G34250:transposable_element_gene;AT1TE40635:transposable_element;AT1TE40640:transposable_element;		-0.114924		hypo		no		n/a
Chr4	1097064	1097346			AT4TE05570:transposable_element;		-0.134865		hypo		no		n/a
Chr3	8547321	8547856			Intergenic		-0.174131		hypo		no		n/a
Chr2	3403210	3403375			Intergenic		-0.124693		hypo		no		n/a
Chr1	24385337	24385756			Intergenic		-0.142537		hypo		no		n/a
Chr1	8775898	8776204			AT1G24822:CDS;AT1G24880:CDS,five_prime_UTR;		-0.508404		hypo		no		UM
Chr1	21932718	21933090			AT1G59680:CDS;AT1TE72370:transposable_element;AT1TE72375:transposable_element;		-0.197238		hypo		no		UM
Chr3	10457557	10457729			AT3G28100:CDS;AT3TE43440:transposable_element;		-0.169162		hypo		no		UM
Chr3	18633496	18633811			AT3TE75590:transposable_element;		-0.258122		hypo		no		n/a
Chr3	11265931	11266187			AT3TE46960:transposable_element;		-0.14976		hypo		no		n/a
Chr1	11212220	11212599			AT1TE36255:transposable_element;		-0.133183		hypo		no		n/a
Chr4	5273508	5273762			AT4TE21915:transposable_element;		-0.161648		hypo		no		n/a
Chr1	7344434	7344576			Intergenic		-0.203625		hypo		no		n/a
Chr5	1108807	1109039			Intergenic		-0.145672		hypo		no		n/a
Chr2	9584331	9584473			AT2TE40830:transposable_element;		-0.209333		hypo		no		n/a
Chr2	13634380	13634508			AT2TE59995:transposable_element;		-0.20374		hypo		no		n/a
Chr1	23068148	23068237			Intergenic		-0.170506		hypo		no		n/a
Chr1	6198157	6198649			AT1TE20040:transposable_element;		-0.178713		hypo		no		n/a
Chr3	9595335	9595484			Intergenic		-0.166195		hypo		no		n/a
Chr5	15101633	15101995			AT5TE54595:transposable_element;		-0.107466		hypo		no		n/a
Chr4	11963833	11963928			AT4G22770:three_prime_UTR,CDS;		-0.176504		hypo		no		UM
Chr3	19357744	19358196			AT3TE78550:transposable_element;		-0.136		hypo		no		n/a
Chr2	582968	583202			AT2TE02475:transposable_element;		-0.146744		hypo		no		n/a
Chr1	25505247	25505664			Intergenic		-0.144296		hypo		no		n/a
Chr5	17037493	17037782			AT5TE61510:transposable_element;		-0.259176		hypo		no		n/a
Chr5	5707877	5708568			AT5TE20660:transposable_element;		-0.119362		hypo		no		n/a
Chr1	10914445	10915094			AT1TE35250:transposable_element;		-0.123044		hypo		no		n/a
Chr5	9472676	9472791			Intergenic		-0.131481		hypo		no		n/a
Chr5	9422084	9422299			AT5G26780:three_prime_UTR;		-0.124507		hypo		no		UM
Chr5	17710518	17710760			AT5TE63990:transposable_element;		-0.187254		hypo		no		n/a
Chr3	17618979	17619189			AT3G47770:CDS;AT3TE71370:transposable_element;		-0.202231		hypo		no		UM
Chr1	9925292	9925539			Intergenic		-0.197805		hypo		no		n/a
Chr3	19740312	19740449			AT3TE80165:transposable_element;AT3TE80170:transposable_element;		-0.116971		hypo		no		n/a
Chr1	8053955	8054186			AT1TE25915:transposable_element;		-0.116386		hypo		no		n/a
Chr4	10927923	10928068			Intergenic		-0.13909		hypo		no		n/a
Chr1	18930697	18930852			AT1G51080:CDS,five_prime_UTR;AT1TE62705:transposable_element;		-0.129652		hypo		no		UM
Chr1	22563838	22563963			Intergenic		-0.130611		hypo		no		n/a
Chr1	541097	541163			AT1TE01755:transposable_element;		-0.105098		hypo		no		n/a
Chr4	12607026	12607288			AT4TE58755:transposable_element;AT4TE58760:transposable_element;		-0.124957		hypo		no		n/a
Chr2	5394026	5394124			AT2TE21845:transposable_element;		-0.120566		hypo		no		n/a
Chr5	18985540	18985690			AT5TE68295:transposable_element;		-0.169137		hypo		no		n/a
Chr3	6247014	6247221			AT3TE26260:transposable_element;		-0.108927		hypo		no		n/a
Chr4	10189838	10189912			Intergenic		-0.195746		hypo		no		n/a
Chr4	6172533	6172840			AT4TE26105:transposable_element;AT4TE26110:transposable_element;AT4TE26115:transposable_element;		-0.103371		hypo		no		n/a
Chr5	9740817	9741038			AT5TE35360:transposable_element;AT5TE35365:transposable_element;		-0.185874		hypo		no		n/a
Chr4	17316814	17317030			Intergenic		-0.189287		hypo		no		n/a
Chr3	16569858	16570219			AT3TE67185:transposable_element;		-0.112544		hypo		no		n/a
Chr3	3497316	3497419			Intergenic		-0.144632		hypo		no		n/a
Chr5	7473155	7473231			AT5G22500:CDS;		-0.101067		hypo		no		UM
Chr5	7605914	7606100			Intergenic		-0.165821		hypo		no		n/a
Chr2	399845	399981			Intergenic		-0.239254		hypo		no		n/a
Chr1	6192765	6192879			AT1G17990:CDS;		-0.500227		hypo		no		UM
Chr3	11294903	11294955			AT3TE47075:transposable_element;		-0.116294		hypo		no		n/a
Chr4	7300229	7300332			Intergenic		-0.115582		hypo		no		n/a
Chr3	21655131	21655562			AT3TE88185:transposable_element;		-0.198584		hypo		no		n/a
Chr4	9357419	9357488			Intergenic		-0.2711		hypo		no		n/a
Chr1	11051533	11051666			Intergenic		-0.133535		hypo		no		n/a
Chr3	15566655	15566755			AT3TE63005:transposable_element;		-0.180207		hypo		no		n/a
Chr2	7856672	7856705			Intergenic		-0.17433		hypo		no		n/a
Chr5	8549287	8549296			Intergenic		-0.161646		hypo		no		n/a
Chr3	719862	719906			AT3TE03050:transposable_element;		-0.106557		hypo		no		n/a
Chr3	18982626	18982796			Intergenic		-0.111371		hypo		no		n/a
Chr2	15708616	15708801			Intergenic		-0.10515		hypo		no		n/a
Chr5	10183363	10183510			AT5TE37090:transposable_element;		-0.127396		hypo		no		n/a
Chr4	11255731	11256063			Intergenic		-0.127364		hypo		no		n/a
Chr4	6227631	6227999			Intergenic		-0.117005		hypo		no		n/a
Chr5	5749457	5749517			Intergenic		-0.128001		hypo		no		n/a
Chr1	18765800	18766068			AT1TE62190:transposable_element;AT1TE62195:transposable_element;AT1TE62200:transposable_element;		-0.173829		hypo		no		n/a
Chr1	13076137	13076161			AT1TE42700:transposable_element;		-0.295541		hypo		no		n/a
Chr3	8232561	8232870			AT3TE34530:transposable_element;		-0.105884		hypo		no		n/a
Chr2	7429174	7429383			AT2G17064:pseudogene;AT2TE30455:transposable_element;		-0.128166		hypo		no		n/a
Chr3	8492533	8492713			AT3TE35610:transposable_element;		-0.162339		hypo		no		n/a
Chr5	1457645	1457811			AT5G04950:three_prime_UTR;		-0.144244		hypo		no		UM
Chr5	6594536	6594757			Intergenic		-0.118564		hypo		no		n/a
Chr4	17511571	17511702			AT4TE84530:transposable_element;		-0.101416		hypo		no		n/a
Chr1	28421279	28421523			AT1TE92970:transposable_element;		-0.149611		hypo		no		n/a
Chr4	1258184	1258317			AT4TE06435:transposable_element;		-0.102633		hypo		no		n/a
ChrM	108851	108988			no match		-0.280436		hypo		no		n/a
Chr5	10882221	10882516			AT5TE39530:transposable_element;		-0.137552		hypo		no		n/a
Chr1	28785465	28785655			AT1TE94190:transposable_element;		-0.120819		hypo		no		n/a
Chr3	19464781	19464830			AT3TE79005:transposable_element;		-0.268234		hypo		no		n/a
Chr1	29305618	29305816			Intergenic		-0.164342		hypo		no		n/a
Chr3	8067232	8067480			Intergenic		-0.109089		hypo		no		n/a
Chr1	28750155	28750634			AT1TE94070:transposable_element;		-0.168432		hypo		no		n/a
Chr5	15993286	15993611			Intergenic		-0.143319		hypo		no		n/a
Chr4	7721040	7721152			AT4TE33830:transposable_element;		-0.167525		hypo		no		n/a
Chr5	24116854	24117188			Intergenic		-0.129973		hypo		no		n/a
Chr2	7558292	7558512			Intergenic		-0.171921		hypo		no		n/a
Chr5	6397921	6398004			Intergenic		-0.129162		hypo		no		n/a
Chr3	42749	42830			AT3TE00190:transposable_element;		-0.23507		hypo		no		n/a
Chr4	9770614	9770689			AT4TE44260:transposable_element;		-0.155371		hypo		no		n/a
Chr4	6099179	6099312			AT4TE25720:transposable_element;		-0.107025		hypo		no		n/a
Chr1	21990997	21991109			Intergenic		-0.107401		hypo		no		n/a
Chr4	5383104	5383177			AT4TE22480:transposable_element;		-0.290769		hypo		no		n/a
Chr1	9866884	9867449			AT1TE31775:transposable_element;AT1TE31780:transposable_element;AT1TE31785:transposable_element;AT1TE31790:transposable_element;		-0.294192		hypo		no		n/a
Chr2	11495613	11495895			Intergenic		-0.199669		hypo		no		n/a
Chr1	24744560	24744743			Intergenic		-0.119963		hypo		no		n/a
Chr4	764237	764313			AT4TE03920:transposable_element;		-0.108973		hypo		no		n/a
Chr1	18658102	18658226			Intergenic		-0.129948		hypo		no		n/a
Chr4	5613255	5613408			AT4TE23520:transposable_element;		-0.158434		hypo		no		n/a
Chr2	1124019	1124194			AT2TE05080:transposable_element;		-0.15689		hypo		no		n/a
Chr4	13248915	13249077			Intergenic		-0.137074		hypo		no		n/a
Chr5	24378977	24379079			Intergenic		-0.110325		hypo		no		n/a
Chr4	16864522	16864675			AT4TE81120:transposable_element;		-0.12994		hypo		no		n/a
Chr2	7057050	7057127			Intergenic		-0.163915		hypo		no		n/a
Chr1	7936921	7937248			Intergenic		-0.2172		hypo		no		n/a
Chr1	21042558	21042677			AT1TE69495:transposable_element;		-0.15336		hypo		no		n/a
Chr3	11959612	11959881			AT3TE49790:transposable_element;		-0.187409		hypo		no		n/a
Chr2	14571766	14571915			AT2TE64580:transposable_element;		-0.113283		hypo		no		n/a
Chr2	14190870	14191237			AT2TE62740:transposable_element;		-0.140557		hypo		no		n/a
Chr1	3572769	3572944			AT1G10745:CDS;		-0.298307		hypo		no		CHH-gene
Chr5	22805036	22805130			AT5TE82040:transposable_element;		-0.329602		hypo		no		n/a
Chr4	15232408	15232433			Intergenic		-0.190834		hypo		no		n/a
Chr4	9088740	9088868			AT4TE40735:transposable_element;		-0.12414		hypo		no		n/a
Chr1	4966329	4966431			Intergenic		-0.152861		hypo		no		n/a
Chr4	12698519	12698822			AT4TE59255:transposable_element;		-0.165011		hypo		no		n/a
Chr3	16880188	16880257			AT3TE68385:transposable_element;		-0.136838		hypo		no		n/a
Chr2	1573250	1573414			AT2TE07225:transposable_element;		-0.143315		hypo		no		n/a
Chr2	511133	511326			AT2TE02190:transposable_element;		-0.127299		hypo		no		n/a
Chr2	1107976	1108089			Intergenic		-0.1196		hypo		no		n/a
Chr1	24092982	24093187			AT1TE79215:transposable_element;		-0.1257		hypo		no		n/a
Chr4	2398171	2398432			AT4TE11175:transposable_element;		-0.144733		hypo		no		n/a
Chr2	10291285	10291374			Intergenic		-0.118661		hypo		no		n/a
Chr2	110186	110492			Intergenic		-0.211221		hypo		no		n/a
Chr5	8262628	8262807			Intergenic		-0.182883		hypo		no		n/a
Chr2	407253	407316			AT2G01900:CDS;		-0.104295		hypo		no		UM
Chr5	9316791	9317085			AT5TE33725:transposable_element;		-0.117727		hypo		no		n/a
Chr3	5865509	5865742			AT3TE24680:transposable_element;		-0.155085		hypo		no		n/a
Chr5	20883984	20884017			Intergenic		-0.147378		hypo		no		n/a
Chr2	16952346	16952583			Intergenic		-0.207142		hypo		no		n/a
Chr3	10293426	10293530			AT3TE42790:transposable_element;AT3TE42795:transposable_element;		-0.183878		hypo		no		n/a
Chr2	1360589	1360892			AT2TE06205:transposable_element;		-0.107059		hypo		no		n/a
Chr3	5228537	5228803			AT3TE22000:transposable_element;		-0.159427		hypo		no		n/a
Chr5	6295878	6295952			AT5TE22815:transposable_element;AT5TE22820:transposable_element;		-0.149069		hypo		no		n/a
Chr4	11235838	11236004			Intergenic		-0.136184		hypo		no		n/a
Chr4	10631933	10632018			AT4TE48650:transposable_element;		-0.156869		hypo		no		n/a
ChrM	65123	65254			no match		-0.151075		hypo		no		n/a
Chr4	4195328	4195407			AT4TE18080:transposable_element;		-0.147455		hypo		no		n/a
Chr3	11862415	11862469			AT3TE49390:transposable_element;		-0.143833		hypo		no		n/a
Chr1	2233833	2233966			Intergenic		-0.116516		hypo		no		n/a
Chr5	21969738	21969794			AT5TE79110:transposable_element;		-0.146974		hypo		no		n/a
Chr1	11991518	11991886			AT1TE38835:transposable_element;		-0.227053		hypo		no		n/a
Chr3	8662375	8662474			AT3G23980:three_prime_UTR;		-0.10908		hypo		no		CG-gbm
Chr5	6469723	6469864			AT5TE23410:transposable_element;		-0.130739		hypo		no		n/a
Chr3	11904417	11904476			Intergenic		-0.157953		hypo		no		n/a
Chr1	423123	423339			AT1TE01370:transposable_element;		-0.113323		hypo		no		n/a
Chr2	18285051	18285113			AT2G44220:CDS;		-0.156186		hypo		no		UM
Chr3	17742036	17742125			AT3G48057:miRNA;		-0.122009		hypo		no		n/a
Chr1	22731967	22731972			Intergenic		-0.212287		hypo		no		n/a
Chr5	8037168	8037245			Intergenic		-0.145949		hypo		no		n/a
Chr1	9853469	9853542			Intergenic		-0.12611		hypo		no		n/a
Chr3	12143469	12143618			AT3TE50485:transposable_element;		-0.100738		hypo		no		n/a
Chr2	293002	293304			AT2TE01205:transposable_element;		-0.13464		hypo		no		n/a
Chr3	18570039	18570197			Intergenic		-0.156127		hypo		no		n/a
Chr2	8231592	8231655			Intergenic		-0.219566		hypo		no		n/a
Chr1	21223768	21223895			AT1G56630:CDS;		-0.150044		hypo		no		UM
Chr2	5775382	5775520			AT2G13820:three_prime_UTR;AT2TE23480:transposable_element;		-0.113401		hypo		no		UM
Chr5	22607197	22607583			Intergenic		-0.131495		hypo		no		n/a
Chr4	6366099	6366211			AT4G10201:pseudogene;		-0.113284		hypo		no		n/a
Chr5	19746362	19746373			Intergenic		-0.151222		hypo		no		n/a
Chr2	9279122	9279504			AT2TE39335:transposable_element;		-0.136463		hypo		no		n/a
Chr1	1876494	1876719			AT1G06148:three_prime_UTR;AT1TE06140:transposable_element;		-0.118023		hypo		no		UM
Chr5	14273167	14273228			AT5G36228:three_prime_UTR;		-0.171016		hypo		no		CHH-gene
Chr5	14603697	14603763			AT5TE52485:transposable_element;AT5TE52490:transposable_element;		-0.146154		hypo		no		n/a
Chr1	19466398	19466467			AT1TE64445:transposable_element;		-0.118148		hypo		no		n/a
Chr1	11204831	11204849			Intergenic		-0.141688		hypo		no		n/a
Chr2	3255740	3255856			AT2G07743:tRNA;		-0.198004		hypo		no		n/a
Chr5	8994046	8994245			Intergenic		-0.116157		hypo		no		n/a
Chr2	16363649	16363776			Intergenic		-0.195077		hypo		no		n/a
Chr2	9425692	9425859			Intergenic		-0.106053		hypo		no		n/a
Chr5	18534128	18534180			Intergenic		-0.101253		hypo		no		n/a
Chr1	24484286	24484454			AT1TE80410:transposable_element;		-0.173846		hypo		no		n/a
Chr2	10369165	10369234			AT2TE44435:transposable_element;		-0.13489		hypo		no		n/a
Chr1	21977296	21977554			AT1TE72560:transposable_element;		-0.140842		hypo		no		n/a
Chr4	11225681	11225843			AT4TE51580:transposable_element;AT4TE51585:transposable_element;		-0.195785		hypo		no		n/a
Chr1	23748854	23748880			AT1G64000:CDS;		-0.13198		hypo		no		UM
Chr2	11183269	11183527			AT2TE48300:transposable_element;		-0.119166		hypo		no		n/a
Chr4	6943085	6943146			Intergenic		-0.106754		hypo		no		n/a
Chr1	23734946	23734996			Intergenic		-0.221056		hypo		no		n/a
Chr3	18758593	18758753			Intergenic		-0.118901		hypo		no		n/a
Chr3	16737270	16737427			Intergenic		-0.124181		hypo		no		n/a
Chr2	17036	17308			AT2TE00015:transposable_element;		-0.134165		hypo		no		n/a
Chr5	16600843	16600887			AT5G41490:CDS;		-0.134492		hypo		no		CHH-gene
Chr4	13204378	13204432			AT4TE61970:transposable_element;		-0.123852		hypo		no		n/a
Chr5	9888646	9888820			AT5G27882:transposable_element_gene;		-0.10249		hypo		no		n/a
Chr5	26161274	26161330			Intergenic		-0.100056		hypo		no		n/a
Chr5	23340080	23340227			Intergenic		-0.122051		hypo		no		n/a
Chr1	21269523	21269578			AT1G56750:tRNA;		-0.328597		hypo		no		n/a
Chr5	18494329	18494466			AT5G45605:transposable_element_gene;AT5TE66565:transposable_element;		-0.421244		hypo		no		n/a
Chr3	9724791	9724965			AT3TE40530:transposable_element;		-0.326126		hypo		no		n/a
Chr5	21467148	21467193			Intergenic		-0.119323		hypo		no		n/a
ChrM	44981	45144			no match		-0.14949		hypo		no		n/a
Chr1	21188883	21189044			Intergenic		-0.230717		hypo		no		n/a
Chr4	12335510	12335696			AT4TE57330:transposable_element;		-0.142466		hypo		no		n/a
Chr3	8957532	8957658			AT3G24542:three_prime_UTR,CDS;		-0.110561		hypo		no		CHH-gene
Chr5	21815419	21815581			AT5TE78580:transposable_element;		-0.110169		hypo		no		n/a
Chr4	12968572	12968640			AT4TE60700:transposable_element;		-0.106463		hypo		no		n/a
Chr2	9169525	9169559			Intergenic		-0.14315		hypo		no		n/a
Chr4	2592395	2592424			AT4TE12140:transposable_element;AT4TE12145:transposable_element;		-0.181918		hypo		no		n/a
Chr5	15900941	15900985			Intergenic		-0.105506		hypo		no		n/a
Chr4	14886989	14887081			AT4TE70655:transposable_element;		-0.117562		hypo		no		n/a
Chr1	19054286	19054603			AT1TE63135:transposable_element;AT1TE63140:transposable_element;		-0.130411		hypo		no		n/a
Chr1	11452110	11452133			AT1TE37050:transposable_element;		-0.112308		hypo		no		n/a
Chr1	24126410	24126564			AT1TE79345:transposable_element;		-0.169551		hypo		no		n/a
Chr1	9746343	9746359			Intergenic		-0.150406		hypo		no		n/a
Chr1	13076534	13076580			Intergenic		-0.111348		hypo		no		n/a
Chr5	8063597	8063606			Intergenic		-0.101356		hypo		no		n/a
Chr2	1386636	1387065			AT2TE06370:transposable_element;AT2TE06375:transposable_element;		-0.131612		hypo		no		n/a
Chr2	4025949	4026059			AT2TE17075:transposable_element;AT2TE17080:transposable_element;		-0.105491		hypo		no		n/a
Chr1	25609696	25609788			Intergenic		-0.18822		hypo		no		n/a
Chr5	9298014	9298050			AT5TE33645:transposable_element;		-0.121721		hypo		no		n/a
Chr5	18493951	18494018			AT5G45605:transposable_element_gene;AT5TE66565:transposable_element;		-0.365591		hypo		no		n/a
Chr5	9872448	9872556			AT5TE35950:transposable_element;		-0.123002		hypo		no		n/a
Chr5	7272526	7272531			Intergenic		-0.145279		hypo		no		n/a
Chr5	19152431	19152551			AT5TE68915:transposable_element;		-0.127278		hypo		no		n/a
Chr3	2988575	2988602			AT3TE12545:transposable_element;		-0.152202		hypo		no		n/a
Chr4	10758991	10759024			Intergenic		-0.145278		hypo		no		n/a
Chr2	4449842	4449875			AT2TE18685:transposable_element;		-0.139007		hypo		no		n/a
Chr1	23820682	23820741			Intergenic		-0.108834		hypo		no		n/a
Chr1	22129353	22129618			Intergenic		-0.108192		hypo		no		n/a
Chr1	22542404	22542439			Intergenic		-0.143132		hypo		no		n/a
Chr4	6487759	6487788			Intergenic		-0.111364		hypo		no		n/a
Chr4	11216321	11216378			Intergenic		-0.119712		hypo		no		n/a
Chr4	9598563	9598600			AT4TE43370:transposable_element;		-0.167095		hypo		no		n/a
Chr2	987141	987470			Intergenic		-0.178901		hypo		no		n/a
Chr3	8002239	8002333			Intergenic		-0.120834		hypo		no		n/a
Chr2	19171993	19172025			AT2TE87280:transposable_element;		-0.125123		hypo		no		n/a
Chr3	11718688	11718772			AT3TE48805:transposable_element;		-0.105567		hypo		no		n/a
Chr2	1716553	1716754			AT2TE07965:transposable_element;AT2TE07970:transposable_element;		-0.115161		hypo		no		n/a
Chr3	10666418	10666496			AT3TE44325:transposable_element;		-0.205648		hypo		no		n/a
Chr2	14311122	14311177			AT2TE63320:transposable_element;AT2TE63325:transposable_element;		-0.132494		hypo		no		n/a
Chr3	9347137	9347145			Intergenic		-0.190239		hypo		no		n/a
Chr4	9757268	9757307			Intergenic		-0.167605		hypo		no		n/a
Chr2	10036944	10036985			AT2TE42940:transposable_element;AT2TE42945:transposable_element;		-0.158442		hypo		no		n/a
Chr2	7177270	7177574			AT2TE29225:transposable_element;		-0.198698		hypo		no		n/a
Chr5	24101241	24101260			Intergenic		-0.121285		hypo		no		n/a
Chr1	11299033	11299219			AT1TE36550:transposable_element;		-0.128645		hypo		no		n/a
Chr1	27597336	27597366			Intergenic		-0.127558		hypo		no		n/a
Chr2	5052571	5052665			Intergenic		-0.238195		hypo		no		n/a
Chr2	10683767	10683787			AT2TE45805:transposable_element;		-0.110301		hypo		no		n/a
Chr2	2174686	2174943			AT2TE10005:transposable_element;		-0.16448		hypo		no		n/a
Chr5	2675978	2675998			Intergenic		-0.114622		hypo		no		n/a
Chr5	3738267	3738312			Intergenic		-0.113909		hypo		no		n/a
Chr3	10958594	10958704			AT3G28925:CDS;AT3TE45580:transposable_element;		-0.135874		hypo		no		CHH-gene
Chr1	23164749	23164759			Intergenic		-0.181756		hypo		no		n/a
Chr2	12414024	12414169			AT2G28900:three_prime_UTR;AT2TE54190:transposable_element;		-0.116885		hypo		no		UM
Chr2	13560073	13560101			Intergenic		-0.105448		hypo		no		n/a
Chr3	11090934	11090962			AT3TE46130:transposable_element;		-0.11508		hypo		no		n/a
Chr1	5437767	5437817			AT1TE17555:transposable_element;		-0.101159		hypo		no		n/a
Chr2	9439862	9439902			Intergenic		-0.118911		hypo		no		n/a
Chr4	10112183	10112210			Intergenic		-0.140527		hypo		no		n/a
Chr3	7772568	7772605			Intergenic		-0.217225		hypo		no		n/a
Chr3	4579868	4579906			Intergenic		-0.192946		hypo		no		n/a
Chr5	7133773	7133898			AT5TE25795:transposable_element;		-0.124797		hypo		no		n/a
Chr3	16006033	16006050			AT3TE64790:transposable_element;		-0.11696		hypo		no		n/a
Chr2	1482378	1482610			AT2TE06865:transposable_element;		-0.127344		hypo		no		n/a
Chr3	4341149	4341246			AT3TE18295:transposable_element;		-0.174497		hypo		no		n/a
Chr5	4937468	4937478			AT5TE17840:transposable_element;AT5TE17845:transposable_element;		-0.112241		hypo		no		n/a
Chr4	199597	199617			Intergenic		-0.157532		hypo		no		n/a
Chr2	13702845	13702853			Intergenic		-0.120931		hypo		no		n/a
Chr2	8643371	8643404			Intergenic		-0.216768		hypo		no		n/a
Chr4	15160448	15160509			Intergenic		-0.143127		hypo		no		n/a
Chr1	20208336	20208348			Intergenic		-0.141661		hypo		no		n/a
Chr1	22079952	22079979			Intergenic		-0.138206		hypo		no		n/a
Chr3	22954322	22954346			Intergenic		-0.143487		hypo		no		n/a
Chr4	1532914	1532975			AT4TE07800:transposable_element;		-0.166087		hypo		no		n/a
Chr5	25487528	25487621			AT5TE91680:transposable_element;		-0.103658		hypo		no		n/a
Chr3	20726235	20726238			AT3TE84280:transposable_element;		-0.103759		hypo		no		n/a
Chr3	15686692	15686804			AT3TE63440:transposable_element;		-0.119307		hypo		no		n/a
Chr5	9818446	9818460			AT5TE35715:transposable_element;		-0.135617		hypo		no		n/a
Chr2	1092260	1092360			AT2TE04910:transposable_element;		-0.192053		hypo		no		n/a
Chr1	12640412	12640641			Intergenic		-0.130769		hypo		no		n/a
Chr5	18494840	18494899			AT5G45605:transposable_element_gene;AT5TE66565:transposable_element;		-0.253021		hypo		no		n/a
Chr3	18561644	18561748			Intergenic		-0.274552		hypo		no		n/a
Chr2	10558057	10558102			AT2TE45315:transposable_element;		-0.102129		hypo		no		n/a
Chr2	9550759	9550828			Intergenic		-0.135663		hypo		no		n/a
Chr4	199960	200026			Intergenic		-0.177192		hypo		no		n/a
Chr4	17425912	17425940			Intergenic		-0.16872		hypo		no		n/a
Chr4	6798208	6798271			Intergenic		-0.11227		hypo		no		n/a
Chr2	5918053	5918092			Intergenic		-0.10762		hypo		no		n/a
Chr1	24577010	24577186			AT1TE80725:transposable_element;		-0.1354		hypo		no		n/a
Chr2	10931803	10931857			AT2TE47025:transposable_element;		-0.170988		hypo		no		n/a
Chr1	26140212	26140271			AT1TE85640:transposable_element;		-0.102533		hypo		no		n/a
Chr2	7905690	7905926			AT2TE32750:transposable_element;		-0.163205		hypo		no		n/a
Chr5	17303395	17303591			AT5TE62540:transposable_element;		-0.123226		hypo		no		n/a
Chr5	12509324	12509498			AT5TE44320:transposable_element;		-0.138041		hypo		no		n/a
Chr5	14704693	14704808			Intergenic		-0.101084		hypo		no		n/a
Chr5	1444397	1444416			Intergenic		-0.145682		hypo		no		n/a
Chr1	18297930	18297942			Intergenic		-0.166632		hypo		no		n/a
Chr2	306107	306116			Intergenic		-0.150195		hypo		no		n/a
Chr2	3445157	3445203			AT2G07815:CDS;		-0.118835		hypo		no		UM
Chr2	12574996	12575026			AT2G29240:transposable_element_gene;AT2TE54910:transposable_element;		-0.127287		hypo		no		n/a
Chr2	13113071	13113200			AT2TE57480:transposable_element;		-0.113865		hypo		no		n/a
Chr2	10113977	10113983			AT2TE43265:transposable_element;		-0.107411		hypo		no		n/a
Chr5	13708497	13708519			Intergenic		-0.177374		hypo		no		n/a
Chr1	9357977	9357993			Intergenic		-0.134573		hypo		no		n/a
Chr2	17307567	17307584			Intergenic		-0.2194		hypo		no		n/a
Chr5			12978681	12980868		AT5G34825:transposable_element_gene;AT5TE46175:transposable_element;		0.105869		hyper		no
Chr3			10806119	10807636		AT3G28780:three_prime_UTR,CDS;AT3TE44935:transposable_element;		0.124803		hyper		no
ChrC			104939	105613		no match		0.124363		hyper		no
Chr1			17056724	17058556		AT1G45120:transposable_element_gene;AT1TE56445:transposable_element;		0.11572		hyper		no
Chr5			8502779	8506034		AT5G24775:transposable_element_gene;AT5TE30770:transposable_element;AT5TE30775:transposable_element;AT5TE30780:transposable_element;		0.104619		hyper		no
Chr2			6028825	6030496		AT2G14230:transposable_element_gene;AT2G14240:transposable_element_gene;AT2TE24525:transposable_element;		0.156807		hyper		no
Chr3			7749000	7750837		AT3G21990:CDS,five_prime_UTR;		0.166164		hyper		no
Chr1			12270119	12270856		AT1TE39855:transposable_element;		0.117211		hyper		no
Chr4			5987948	5988917		AT4G09455:transposable_element_gene;AT4TE25200:transposable_element;		0.173284		hyper		yes
Chr3			17392412	17393361		AT3G47230:transposable_element_gene;AT3TE70525:transposable_element;AT3TE70530:transposable_element;		0.101532		hyper		no
Chr5			1229361	1230534		Intergenic		0.139166		hyper		no
Chr1			13352756	13353886		AT1TE43660:transposable_element;AT1TE43665:transposable_element;		0.146557		hyper		no
Chr1			4603859	4604452		Intergenic		0.200881		hyper		no
Chr2			9670615	9671774		Intergenic		0.262048		hyper		no
Chr5			8893041	8893917		Intergenic		0.174032		hyper		no
Chr3			10640799	10641578		AT3G28410:CDS;		0.148319		hyper		no
Chr2			6027007	6027964		AT2G14220:transposable_element_gene;AT2G14230:transposable_element_gene;AT2TE24520:transposable_element;AT2TE24525:transposable_element;		0.126213		hyper		no
Chr1			8159888	8160857		AT1TE26260:transposable_element;		0.114289		hyper		no
Chr5			10308489	10309326		AT5G28335:transposable_element_gene;AT5TE37660:transposable_element;		0.107629		hyper		no
Chr1			6959636	6960082		Intergenic		0.18209		hyper		no
Chr2			1973477	1974592		AT2G05390:transposable_element_gene;AT2TE09100:transposable_element;		0.126847		hyper		no
Chr1			6911655	6912321		Intergenic		0.107482		hyper		no
Chr3			15882230	15883706		AT3G44130:CDS;AT3TE64245:transposable_element;AT3TE64250:transposable_element;		0.109076		hyper		no
Chr2			1422011	1423934		AT2G04180:transposable_element_gene;AT2TE06530:transposable_element;AT2TE06535:transposable_element;AT2TE06540:transposable_element;AT2TE06545:transposable_element;AT2TE06550:transposable_element;		0.105633		hyper		no
Chr4			16141722	16142323		AT4G33585:three_prime_UTR,CDS,five_prime_UTR;		0.206846		hyper		yes
Chr5			14905242	14906180		Intergenic		0.112876		hyper		no
Chr1			16274114	16274547		Intergenic		0.146981		hyper		no
Chr1			12376417	12377981		Intergenic		0.106344		hyper		no
Chr5			1559819	1560386		AT5G05260:CDS;		0.140678		hyper		no
Chr1			17713458	17714285		AT1TE58825:transposable_element;		0.148182		hyper		no
Chr4			8621707	8623015		AT4G15096:CDS;AT4TE38410:transposable_element;		0.142093		hyper		no
Chr1			11692484	11693409		AT1TE37865:transposable_element;AT1TE37870:transposable_element;AT1TE37875:transposable_element;		0.149713		hyper		no
Chr5			14077415	14078154		AT5G35932:pseudogene;		0.108689		hyper		no
Chr4			9484103	9484798		AT4G16870:transposable_element_gene;AT4TE42860:transposable_element;		0.112555		hyper		no
Chr5			20464164	20465134		AT5G50290:three_prime_UTR;AT5TE73730:transposable_element;		0.11096		hyper		no
Chr3			11975565	11976110		AT3G30380:CDS;		0.123031		hyper		no
Chr5			14087197	14088372		AT5G35935:transposable_element_gene;AT5TE50260:transposable_element;		0.150166		hyper		no
Chr2			6647738	6648517		AT2TE27095:transposable_element;		0.131324		hyper		no
Chr1			17255041	17255881		AT1G46624:transposable_element_gene;		0.128459		hyper		no
Chr2			12755023	12755428		AT2G29920:CDS;AT2TE55770:transposable_element;		0.110446		hyper		no
Chr5			22094079	22095075		AT5G54410:CDS;AT5TE79535:transposable_element;		0.10548		hyper		no
Chr1			8388662	8391016		AT1G23720:CDS;		0.125472		hyper		no
Chr1			12291202	12292505		AT1G33855:transposable_element_gene;AT1TE39945:transposable_element;AT1TE39950:transposable_element;		0.132256		hyper		no
Chr4			11111970	11112756		AT4G20725:transposable_element_gene;AT4TE50995:transposable_element;		0.100211		hyper		no
Chr5			17212788	17213616		AT5G42930:CDS;		0.144732		hyper		no
Chr2			1002011	1002580		AT2TE04485:transposable_element;		0.325406		hyper		no
Chr3			6001448	6001748		AT3G17530:CDS;		0.277449		hyper		no
Chr5			14786022	14786441		AT5G37330:transposable_element_gene;AT5TE53310:transposable_element;AT5TE53315:transposable_element;		0.10343		hyper		no
Chr3			10961621	10962319		AT3TE45595:transposable_element;		0.153639		hyper		no
Chr3			15776805	15777491		AT3G43970:CDS;AT3TE63780:transposable_element;AT3TE63785:transposable_element;AT3TE63790:transposable_element;		0.112365		hyper		no
Chr3			7764788	7765534		AT3G22050:CDS;		0.170913		hyper		no
Chr3			3542541	3543143		AT3G11310:CDS;		0.208863		hyper		yes
Chr5			22708634	22709135		AT5G56070:CDS;		0.182688		hyper		no
Chr2			1489686	1490419		AT2G04290:transposable_element_gene;AT2TE06885:transposable_element;		0.104463		hyper		no
Chr1			18228528	18229356		AT1G49270:CDS;		0.104369		hyper		no
Chr1			11564464	11565138		AT1G32140:CDS;		0.112783		hyper		no
Chr3			15217896	15218657		AT3G43251:pseudogene;AT3TE61870:transposable_element;AT3TE61875:transposable_element;		0.132592		hyper		no
Chr1			29769409	29770643		AT1TE97380:transposable_element;		0.114678		hyper		no
Chr2			4486993	4487903		AT2G11280:pseudogene;		0.100943		hyper		no
Chr2			4488314	4489529		AT2G11290:transposable_element_gene;AT2TE18825:transposable_element;		0.10637		hyper		no
Chr5			12919826	12920632		AT5G34581:CDS;AT5TE45990:transposable_element;AT5TE45995:transposable_element;		0.137687		hyper		no
Chr4			12841447	12842491		Intergenic		0.1084		hyper		no
Chr4			236540	237584		AT4G00540:CDS,five_prime_UTR;		0.15918		hyper		no
Chr1			16830291	16830676		AT1TE55690:transposable_element;		0.211313		hyper		no
Chr5			6789304	6789924		Intergenic		0.113994		hyper		no
Chr2			9328664	9329519		Intergenic		0.126149		hyper		no
Chr1			13155823	13156385		AT1G35620:five_prime_UTR;AT1TE42935:transposable_element;		0.157782		hyper		no
Chr5			19891132	19892573		AT5G49080:transposable_element_gene;AT5TE71590:transposable_element;AT5TE71595:transposable_element;		0.148461		hyper		no
Chr3			14920649	14921722		AT3G42820:transposable_element_gene;AT3TE60875:transposable_element;		0.162316		hyper		no
Chr1			24264032	24265013		AT1TE79790:transposable_element;		0.148601		hyper		no
Chr3			18830806	18831904		AT3G50674:CDS;AT3TE76350:transposable_element;AT3TE76355:transposable_element;		0.11306		hyper		no
Chr1			12987509	12987888		AT1TE42350:transposable_element;		0.228529		hyper		no
Chr1			3595336	3596001		Intergenic		0.126674		hyper		no
Chr3			8199080	8199871		AT3TE34370:transposable_element;AT3TE34375:transposable_element;		0.144338		hyper		no
Chr1			5353301	5353902		AT1G15560:transposable_element_gene;AT1TE17300:transposable_element;AT1TE17305:transposable_element;		0.121635		hyper		no
Chr1			21746860	21747473		AT1G58602:mRNA;AT1TE71770:transposable_element;		0.141279		hyper		no
Chr1			8052990	8053706		AT1TE25910:transposable_element;		0.142714		hyper		no
Chr5			16962275	16962954		AT5G42405:CDS;AT5TE61220:transposable_element;		0.137069		hyper		no
Chr5			10231456	10232232		AT5TE37325:transposable_element;		0.168078		hyper		no
Chr3			6291457	6291822		AT3G18330:CDS;		0.169678		hyper		no
Chr4			7920907	7921615		AT4G13610:CDS;		0.150217		hyper		no
Chr2			2236715	2237712		AT2G05845:transposable_element_gene;AT2TE10355:transposable_element;		0.141092		hyper		no
Chr5			15653275	15653944		AT5G39100:CDS,five_prime_UTR;		0.105686		hyper		no
Chr5			15806180	15806680		AT5G39490:CDS;		0.111923		hyper		no
Chr3			22031658	22032168		AT3TE89720:transposable_element;		0.224917		hyper		no
Chr3			1030979	1031632		Intergenic		0.274056		hyper		no
Chr5			7671266	7672252		Intergenic		0.109229		hyper		no
Chr3			7669592	7669846		Intergenic		0.140753		hyper		no
Chr1			17448370	17448786		AT1TE57820:transposable_element;		0.180368		hyper		no
Chr4			7013230	7013688		Intergenic		0.122467		hyper		no
Chr5			18223200	18223761		AT5G45105:CDS;		0.110417		hyper		no
Chr5			15873005	15873643		AT5G39640:CDS;AT5G39645:CDS;		0.107289		hyper		no
Chr3			16974155	16975709		AT3G46206:CDS;AT3TE68780:transposable_element;AT3TE68785:transposable_element;		0.125433		hyper		no
Chr1			12952979	12953928		AT1TE42225:transposable_element;AT1TE42230:transposable_element;AT1TE42235:transposable_element;		0.121774		hyper		no
Chr3			16936432	16936914		AT3G46120:CDS;		0.108892		hyper		no
Chr3			20206425	20208123		AT3G54590:CDS;		0.143866		hyper		no
Chr2			7879837	7880747		AT2G18130:CDS;		0.145902		hyper		no
Chr5			17201329	17201828		AT5G42905:CDS;		0.113461		hyper		no
Chr1			21929370	21930061		AT1G59660:three_prime_UTR;AT1G59670:CDS,five_prime_UTR;AT1TE72360:transposable_element;AT1TE72365:transposable_element;		0.138588		hyper		no
Chr3			10702746	10704196		AT3G28550:CDS;		0.102308		hyper		no
Chr1			12041394	12042270		AT1G33200:transposable_element_gene;AT1TE39030:transposable_element;		0.136343		hyper		no
Chr5			24943367	24944420		AT5G62110:CDS;AT5TE89760:transposable_element;		0.132033		hyper		no
Chr5			12967137	12967626		AT5G34790:transposable_element_gene;AT5TE46155:transposable_element;		0.108515		hyper		no
Chr4			8782981	8784302		AT4TE39220:transposable_element;AT4TE39225:transposable_element;		0.110714		hyper		no
Chr3			5915684	5916210		AT3G17320:CDS;		0.113239		hyper		no
Chr3			11584517	11584945		AT3G29755:transposable_element_gene;AT3TE48170:transposable_element;		0.113258		hyper		no
Chr3			8796281	8796848		AT3G24270:CDS;		0.133573		hyper		no
Chr5			21059270	21059963		Intergenic		0.148178		hyper		no
Chr5			14821246	14822016		AT5TE53430:transposable_element;AT5TE53435:transposable_element;AT5TE53440:transposable_element;		0.123442		hyper		no
Chr4			6211541	6212109		AT4G09875:transposable_element_gene;AT4TE26330:transposable_element;AT4TE26335:transposable_element;		0.103041		hyper		no
Chr2			1636856	1637200		AT2TE07550:transposable_element;		0.114884		hyper		no
Chr1			8573191	8573874		AT1G24210:three_prime_UTR,CDS;AT1TE27655:transposable_element;AT1TE27660:transposable_element;		0.117963		hyper		no
Chr5			19198870	19199284		AT5G47300:CDS;		0.192428		hyper		no
Chr3			13299073	13299942		AT3G32373:transposable_element_gene;AT3TE54385:transposable_element;		0.123611		hyper		no
Chr4			413422	413768		Intergenic		0.101367		hyper		no
Chr5			13115000	13116001		AT5G34854:transposable_element_gene;AT5TE46670:transposable_element;		0.103826		hyper		no
Chr1			14287536	14288317		AT1TE46870:transposable_element;AT1TE46875:transposable_element;AT1TE46880:transposable_element;		0.13686		hyper		no
Chr3			12120664	12121145		AT3G30510:transposable_element_gene;AT3TE50375:transposable_element;		0.103079		hyper		no
Chr1			9903650	9904186		AT1G28304:CDS;		0.140365		hyper		no
Chr3			11391878	11392857		AT3G29577:transposable_element_gene;AT3G29578:transposable_element_gene;AT3TE47500:transposable_element;AT3TE47505:transposable_element;		0.104893		hyper		no
Chr2			8590574	8591468		Intergenic		0.108468		hyper		no
Chr3			2551832	2552108		Intergenic		0.343428		hyper		no
Chr4			1395826	1396414		AT4G03156:CDS;AT4TE07110:transposable_element;		0.126994		hyper		no
Chr5			15408482	15409155		AT5TE55735:transposable_element;		0.126751		hyper		no
Chr5			13906169	13907242		AT5G35736:transposable_element_gene;AT5G35737:CDS;AT5TE49570:transposable_element;		0.130555		hyper		no
Chr1			12548165	12548385		AT1TE40870:transposable_element;AT1TE40875:transposable_element;		0.255821		hyper		no
Chr5			20393743	20394378		Intergenic		0.112237		hyper		no
Chr4			52647	53151		AT4G00140:CDS;		0.122724		hyper		no
Chr4			6536343	6536794		AT4TE27915:transposable_element;		0.144301		hyper		no
Chr4			6156349	6156703		AT4G09775:CDS;		0.13995		hyper		no
Chr1			9464884	9465324		AT1G27220:CDS;		0.139024		hyper		no
Chr5			11278556	11279663		Intergenic		0.110886		hyper		no
Chr1			19598965	19599825		AT1G52610:transposable_element_gene;AT1TE64830:transposable_element;		0.105496		hyper		no
Chr1			22282581	22283408		AT1TE73570:transposable_element;		0.102787		hyper		no
Chr2			11324935	11325889		AT2G26620:CDS;		0.146011		hyper		no
Chr3			8589759	8590858		AT3TE36020:transposable_element;		0.109671		hyper		no
Chr1			958554	959117		AT1G03810:CDS;		0.103237		hyper		no
Chr1			16466428	16467259		Intergenic		0.219328		hyper		no
Chr4			2763031	2763482		AT4G05470:CDS;AT4TE12900:transposable_element;		0.137497		hyper		no
Chr1			12166530	12166792		AT1G33550:transposable_element_gene;AT1TE39490:transposable_element;		0.12881		hyper		no
Chr4			323716	324426		AT4TE01695:transposable_element;AT4TE01700:transposable_element;		0.293566		hyper		no
Chr2			11663253	11663970		AT2TE50665:transposable_element;AT2TE50670:transposable_element;		0.162511		hyper		no
Chr2			11812721	11813001		Intergenic		0.137895		hyper		no
Chr1			12849391	12849831		AT1G35130:transposable_element_gene;AT1TE41820:transposable_element;		0.141652		hyper		no
Chr1			17590270	17590914		AT1G47770:CDS;AT1TE58390:transposable_element;		0.106365		hyper		no
Chr5			15888206	15888915		AT5G39690:CDS;		0.112847		hyper		no
Chr3			9874385	9874780		AT3TE41100:transposable_element;		0.182697		hyper		no
Chr2			1370778	1371728		AT2TE06255:transposable_element;		0.146763		hyper		no
Chr1			20825958	20827289		AT1G55710:CDS;AT1TE68785:transposable_element;		0.10385		hyper		no
Chr4			3149979	3150583		AT4TE14490:transposable_element;		0.119303		hyper		no
Chr5			10019026	10019588		AT5TE36470:transposable_element;AT5TE36475:transposable_element;		0.101815		hyper		no
Chr5			14382337	14382823		AT5G36655:transposable_element_gene;AT5TE51685:transposable_element;		0.101359		hyper		no
Chr4			11844308	11844741		AT4G22485:CDS;		0.129753		hyper		no
Chr4			11497220	11497678		AT4G21640:CDS;		0.134785		hyper		no
Chr1			17929304	17929694		AT1TE59510:transposable_element;		0.225341		hyper		no
Chr3			11263257	11263877		AT3TE46950:transposable_element;AT3TE46955:transposable_element;		0.17298		hyper		no
Chr1			10007553	10008702		AT1G28465:transposable_element_gene;AT1TE32270:transposable_element;AT1TE32275:transposable_element;AT1TE32280:transposable_element;		0.125167		hyper		no
Chr1			12424872	12425856		AT1TE40405:transposable_element;AT1TE40410:transposable_element;AT1TE40415:transposable_element;		0.112502		hyper		no
Chr3			19560828	19561380		AT3G52780:three_prime_UTR;		0.182018		hyper		no
Chr5			21926003	21926755		AT5G54030:CDS;		0.113802		hyper		no
Chr2			10814540	10815073		AT2G25410:CDS;		0.112299		hyper		no
Chr1			22521103	22521526		AT1TE74285:transposable_element;		0.144676		hyper		no
Chr3			10975658	10975970		AT3G28945:transposable_element_gene;AT3TE45620:transposable_element;		0.104071		hyper		no
Chr5			9281788	9282263		Intergenic		0.158657		hyper		no
Chr3			14950283	14951006		AT3G42870:CDS;		0.112713		hyper		no
Chr1			29840571	29841346		AT1TE97605:transposable_element;		0.142133		hyper		no
Chr5			7554092	7554244		Intergenic		0.224332		hyper		no
Chr4			12598776	12599285		AT4G24300:CDS;AT4TE58715:transposable_element;		0.131813		hyper		no
Chr5			7462343	7462588		Intergenic		0.100654		hyper		no
ChrM			278217	279308		no match		0.642979		hyper		no
Chr3			12853798	12854277		AT3G31630:transposable_element_gene;AT3TE52800:transposable_element;AT3TE52805:transposable_element;		0.10298		hyper		no
Chr5			8846524	8847206		AT5TE32025:transposable_element;AT5TE32030:transposable_element;		0.127126		hyper		no
Chr1			9585505	9586580		AT1TE30880:transposable_element;AT1TE30885:transposable_element;AT1TE30890:transposable_element;		0.150884		hyper		no
Chr2			1401827	1402373		AT2G04160:CDS;		0.135506		hyper		no
Chr5			8506647	8507088		Intergenic		0.139895		hyper		no
Chr2			3746722	3747972		AT2TE16220:transposable_element;		0.136931		hyper		no
Chr5			17370422	17371253		AT5G43285:CDS;AT5TE62740:transposable_element;		0.230912		hyper		no
Chr1			26394966	26395252		AT1G70080:CDS;		0.105554		hyper		no
Chr5			10373643	10374050		AT5G28450:CDS;		0.104755		hyper		no
Chr2			15844964	15845372		AT2G37810:CDS;AT2TE70870:transposable_element;		0.233279		hyper		no
Chr2			1177579	1178214		AT2G03860:transposable_element_gene;AT2TE05315:transposable_element;AT2TE05320:transposable_element;		0.132934		hyper		no
Chr1			4493546	4494090		AT1TE14600:transposable_element;		0.169724		hyper		no
Chr4			2868285	2868729		AT4G05585:transposable_element_gene;AT4TE13450:transposable_element;		0.110132		hyper		no
ChrM			262494	263493		no match		0.406562		hyper		no
Chr2			1398121	1399005		AT2G04140:transposable_element_gene;AT2TE06405:transposable_element;		0.164857		hyper		no
Chr1			12651374	12651702		AT1G34550:CDS;AT1TE41310:transposable_element;		0.11016		hyper		no
Chr4			11686002	11686958		AT4TE53985:transposable_element;AT4TE53990:transposable_element;AT4TE53995:transposable_element;		0.166115		hyper		no
Chr3			9300393	9301105		AT3TE38835:transposable_element;		0.187425		hyper		no
Chr5			15982412	15982861		AT5G39920:CDS;		0.119043		hyper		no
Chr1			26882784	26883619		AT1G71320:CDS;		0.130325		hyper		no
Chr2			2325797	2326182		AT2G05995:ncRNA;AT2TE10735:transposable_element;AT2TE10740:transposable_element;		0.127116		hyper		no
Chr5			19063750	19064537		AT5G46970:CDS;		0.143288		hyper		no
Chr2			8332444	8333055		Intergenic		0.128352		hyper		no
Chr1			17547685	17549448		AT1G47705:pseudogene;AT1TE58165:transposable_element;AT1TE58170:transposable_element;AT1TE58175:transposable_element;AT1TE58180:transposable_element;		0.171931		hyper		no
Chr5			21192632	21193287		AT5TE76320:transposable_element;		0.135807		hyper		no
Chr1			12514664	12515215		AT1G34315:CDS;AT1TE40730:transposable_element;		0.105899		hyper		no
Chr1			23880012	23880731		AT1G64340:three_prime_UTR,CDS;AT1TE78575:transposable_element;AT1TE78580:transposable_element;		0.132649		hyper		no
Chr3			13031918	13032844		AT3G32030:CDS;		0.12681		hyper		no
Chr5			16966497	16967350		AT5TE61230:transposable_element;AT5TE61235:transposable_element;AT5TE61240:transposable_element;		0.138163		hyper		no
Chr3			5780091	5780624		Intergenic		0.110205		hyper		no
Chr5			15155110	15155640		AT5G38005:ncRNA;		0.135085		hyper		no
Chr5			21929317	21929889		AT5G54040:CDS;		0.13361		hyper		no
Chr1			16793686	16794110		AT1TE55540:transposable_element;		0.134111		hyper		no
Chr3			15444063	15444434		AT3G43546:transposable_element_gene;AT3TE62655:transposable_element;		0.102631		hyper		no
Chr4			6055483	6055932		Intergenic		0.127097		hyper		no
Chr3			7600259	7600666		AT3G21570:three_prime_UTR,CDS;		0.115013		hyper		no
Chr5			19121588	19122275		AT5TE68760:transposable_element;AT5TE68765:transposable_element;AT5TE68770:transposable_element;		0.129476		hyper		no
Chr1			8738163	8738880		AT1G24657:pseudogene;		0.172957		hyper		no
Chr1			27076783	27077083		AT1G71930:CDS;		0.104704		hyper		no
Chr2			2071223	2071892		Intergenic		0.11487		hyper		no
Chr1			8512865	8513762		AT1TE27470:transposable_element;		0.128645		hyper		no
Chr1			17381491	17382081		AT1TE57565:transposable_element;		0.130156		hyper		no
Chr4			6759242	6759594		AT4G11070:CDS;		0.151849		hyper		no
Chr4			6028091	6028504		AT4TE25380:transposable_element;AT4TE25385:transposable_element;		0.145169		hyper		no
Chr4			420474	421163		AT4G00970:CDS;		0.111256		hyper		no
Chr5			702343	702644		AT5G02990:CDS;		0.112996		hyper		no
Chr5			10724416	10724917		AT5TE39035:transposable_element;		0.169628		hyper		no
Chr5			17759785	17760098		Intergenic		0.149666		hyper		no
Chr1			21335341	21336358		AT1TE70460:transposable_element;AT1TE70465:transposable_element;AT1TE70470:transposable_element;		0.164454		hyper		no
Chr2			16713578	16714226		Intergenic		0.21344		hyper		no
Chr3			7901891	7902492		AT3G22350:CDS;		0.148003		hyper		no
Chr4			12102032	12102368		AT4G23100:three_prime_UTR;		0.147583		hyper		no
Chr5			19965024	19965381		AT5G49250:CDS;		0.177737		hyper		no
Chr1			26780530	26781266		AT1TE87630:transposable_element;		0.116169		hyper		no
Chr2			18676188	18676732		Intergenic		0.154971		hyper		no
Chr3			12298768	12299525		AT3TE50925:transposable_element;		0.172333		hyper		no
Chr3			5683306	5683837		AT3G16680:CDS,five_prime_UTR;		0.125053		hyper		no
Chr3			10700747	10701658		AT3G28550:three_prime_UTR,CDS;		0.114711		hyper		no
Chr2			2951482	2952541		AT2TE12845:transposable_element;AT2TE12850:transposable_element;		0.188676		hyper		no
Chr5			1686231	1686707		AT5G05650:CDS;		0.135888		hyper		no
Chr2			13540996	13541648		Intergenic		0.159022		hyper		no
Chr3			9148792	9149094		Intergenic		0.178249		hyper		no
Chr5			19557824	19558441		AT5TE70370:transposable_element;AT5TE70375:transposable_element;		0.176339		hyper		no
Chr1			11318586	11318962		AT1G31630:CDS;		0.112144		hyper		no
Chr5			14556081	14557655		AT5G36904:pseudogene;		0.111061		hyper		no
Chr5			11000363	11001212		AT5TE39995:transposable_element;AT5TE40000:transposable_element;		0.12283		hyper		no
Chr2			9187317	9187822		AT2TE38900:transposable_element;		0.107234		hyper		no
Chr2			16253259	16254121		Intergenic		0.138153		hyper		no
Chr4			7524253	7524780		AT4TE32825:transposable_element;AT4TE32830:transposable_element;		0.117771		hyper		no
Chr4			249105	249526		AT4G00580:CDS;		0.154862		hyper		no
Chr1			29316323	29316747		AT1G77980:CDS;		0.125741		hyper		no
Chr1			9078117	9079129		AT1G26240:CDS;		0.133323		hyper		no
Chr1			4785928	4787232		AT1TE15510:transposable_element;		0.110263		hyper		no
Chr2			10144980	10145445		AT2TE43410:transposable_element;		0.134608		hyper		no
Chr5			24966331	24966733		AT5G62165:CDS;		0.183385		hyper		no
Chr1			24104607	24105046		Intergenic		0.14219		hyper		no
Chr5			8147415	8148010		AT5TE29480:transposable_element;AT5TE29485:transposable_element;		0.293403		hyper		no
Chr4			11381402	11382401		AT4TE52410:transposable_element;AT4TE52415:transposable_element;		0.168866		hyper		no
Chr5			11534348	11534765		AT5G30420:pseudogene;		0.104904		hyper		no
Chr1			19372547	19373001		Intergenic		0.15682		hyper		no
Chr1			4597006	4597328		Intergenic		0.239933		hyper		no
Chr1			18053483	18053852		AT1G48810:transposable_element_gene;AT1TE59860:transposable_element;		0.143336		hyper		no
Chr4			11820356	11820807		AT4G22415:transposable_element_gene;AT4TE54700:transposable_element;		0.123705		hyper		no
Chr3			19577878	19578145		AT3G52830:CDS;		0.111026		hyper		no
Chr1			18971625	18972274		AT1TE62830:transposable_element;AT1TE62835:transposable_element;		0.125957		hyper		no
Chr5			8667110	8667598		Intergenic		0.110859		hyper		no
Chr3			16647264	16647714		AT3TE67445:transposable_element;		0.114392		hyper		no
Chr5			19751978	19753019		AT5TE71070:transposable_element;AT5TE71075:transposable_element;AT5TE71080:transposable_element;		0.153633		hyper		no
Chr5			5760956	5761665		AT5G17470:CDS;AT5TE20840:transposable_element;		0.125874		hyper		no
Chr4			7892026	7892764		AT4G13575:three_prime_UTR;AT4TE34680:transposable_element;		0.11713		hyper		no
Chr5			18103809	18104651		AT5TE65275:transposable_element;AT5TE65285:transposable_element;AT5TE65290:transposable_element;		0.112436		hyper		no
Chr2			2616664	2617436		AT2TE11750:transposable_element;		0.1557		hyper		no
Chr3			16455791	16456257		AT3TE66730:transposable_element;		0.124208		hyper		no
Chr1			9126486	9127187		AT1G26380:three_prime_UTR,CDS;AT1TE29390:transposable_element;		0.146389		hyper		no
Chr1			10383953	10384486		Intergenic		0.119484		hyper		no
Chr5			699037	699500		Intergenic		0.132496		hyper		no
Chr5			8204107	8204419		AT5G24200:CDS;AT5TE29665:transposable_element;		0.165009		hyper		no
Chr2			2865493	2866210		Intergenic		0.163254		hyper		no
Chr1			16133933	16134210		AT1G42980:CDS;		0.139943		hyper		no
Chr5			14014967	14015694		Intergenic		0.131417		hyper		no
Chr2			10935245	10935815		AT2TE47050:transposable_element;		0.18803		hyper		no
Chr3			8564683	8565108		Intergenic		0.181248		hyper		no
Chr2			10160330	10161015		Intergenic		0.114796		hyper		no
Chr1			20466253	20467327		AT1TE67590:transposable_element;AT1TE67600:transposable_element;AT1TE67605:transposable_element;AT1TE67610:transposable_element;AT1TE67615:transposable_element;		0.249151		hyper		no
Chr1			2415321	2415651		AT1G07800:transposable_element_gene;AT1TE07880:transposable_element;		0.112942		hyper		no
Chr4			5311259	5312037		AT4G08380:CDS;		0.139592		hyper		no
Chr2			6159747	6160326		AT2G14470:transposable_element_gene;AT2TE25020:transposable_element;		0.100911		hyper		no
Chr1			16758301	16758560		AT1G44085:CDS;		0.110519		hyper		no
Chr1			29265397	29265909		Intergenic		0.213183		hyper		no
Chr5			25304099	25304625		AT5TE91020:transposable_element;		0.107223		hyper		no
Chr5			9361467	9362520		AT5TE33935:transposable_element;AT5TE33940:transposable_element;		0.10109		hyper		no
Chr1			5966201	5966610		AT1TE19285:transposable_element;		0.135533		hyper		no
Chr4			6650234	6650667		AT4TE28505:transposable_element;		0.103511		hyper		no
Chr1			25580920	25581602		AT1TE83915:transposable_element;		0.21979		hyper		no
Chr2			8366415	8366863		AT2G19290:CDS;		0.141101		hyper		no
Chr1			11609756	11609978		Intergenic		0.112188		hyper		no
Chr4			15424342	15424940		AT4TE73550:transposable_element;		0.147648		hyper		no
Chr3			9327514	9328156		AT3TE38960:transposable_element;		0.113238		hyper		no
Chr2			13041922	13042308		AT2G30615:CDS;		0.109006		hyper		no
Chr3			22577711	22578159		AT3TE91990:transposable_element;		0.110073		hyper		no
Chr1			12252853	12253365		AT1TE39805:transposable_element;AT1TE39810:transposable_element;		0.106873		hyper		no
Chr3			9331758	9332199		AT3G25630:transposable_element_gene;AT3TE38980:transposable_element;AT3TE38985:transposable_element;		0.145644		hyper		no
Chr3			12350148	12350448		AT3G30724:transposable_element_gene;AT3TE51150:transposable_element;AT3TE51155:transposable_element;		0.154817		hyper		no
Chr3			5629094	5629612		Intergenic		0.169967		hyper		no
Chr1			22060715	22061421		AT1G59930:CDS;AT1TE72845:transposable_element;AT1TE72850:transposable_element;		0.124311		hyper		no
Chr1			11783016	11783508		AT1TE38195:transposable_element;AT1TE38200:transposable_element;		0.223302		hyper		no
Chr1			22269446	22269967		Intergenic		0.161241		hyper		no
Chr3			11828229	11828846		AT3G30200:CDS;		0.127877		hyper		no
Chr2			6328148	6329559		AT2TE25830:transposable_element;		0.255921		hyper		no
Chr1			23477106	23477640		Intergenic		0.13768		hyper		no
Chr1			25452625	25453128		AT1G67875:CDS;		0.128995		hyper		no
Chr5			20145228	20145554		AT5G49630:CDS;		0.192251		hyper		no
Chr2			18527922	18528107		AT2G44925:CDS,five_prime_UTR;		0.112791		hyper		no
Chr5			8811667	8812970		AT5TE31880:transposable_element;AT5TE31885:transposable_element;		0.149246		hyper		no
Chr4			16057982	16058324		Intergenic		0.108134		hyper		no
Chr3			18494803	18495307		AT3TE75045:transposable_element;		0.303738		hyper		no
Chr3			11611106	11611556		AT3G29789:pseudogene;AT3TE48255:transposable_element;		0.121188		hyper		no
Chr1			20519960	20521034		AT1TE67800:transposable_element;AT1TE67805:transposable_element;AT1TE67810:transposable_element;		0.140618		hyper		no
Chr3			9643643	9644051		AT3TE40220:transposable_element;		0.131279		hyper		no
Chr5			7971925	7972146		AT5G23660:three_prime_UTR,CDS;		0.128485		hyper		no
Chr5			11248593	11249477		Intergenic		0.154071		hyper		no
Chr4			14979608	14979862		Intergenic		0.127465		hyper		no
Chr1			12155100	12155357		AT1TE39450:transposable_element;AT1TE39455:transposable_element;AT1TE39460:transposable_element;		0.249813		hyper		no
Chr5			1511244	1511525		AT5G05120:CDS;		0.222353		hyper		no
Chr3			10691149	10692111		AT3TE44415:transposable_element;		0.163888		hyper		no
Chr4			3536003	3536631		Intergenic		0.142134		hyper		no
Chr1			13042739	13043255		Intergenic		0.12626		hyper		no
Chr5			16970884	16971279		AT5TE61255:transposable_element;		0.133689		hyper		no
Chr5			19700826	19701194		AT5G48595:CDS;AT5TE70890:transposable_element;		0.165299		hyper		no
Chr5			23414470	23414708		Intergenic		0.182653		hyper		no
Chr2			9481539	9481838		Intergenic		0.117922		hyper		no
Chr5			15542312	15542624		Intergenic		0.158632		hyper		no
Chr1			9362444	9362643		Intergenic		0.114237		hyper		no
Chr5			16224988	16225319		Intergenic		0.11329		hyper		no
Chr1			26285357	26285688		Intergenic		0.125916		hyper		no
Chr5			14215158	14215849		AT5TE50805:transposable_element;		0.121224		hyper		no
Chr3			10406607	10407068		AT3G28005:transposable_element_gene;AT3TE43235:transposable_element;		0.132488		hyper		no
Chr2			11168767	11169304		AT2TE48220:transposable_element;AT2TE48225:transposable_element;AT2TE48230:transposable_element;		0.185827		hyper		no
Chr4			6784926	6785536		AT4TE29160:transposable_element;		0.129744		hyper		no
Chr3			11199612	11200261		AT3TE46640:transposable_element;		0.130098		hyper		no
Chr1			23454094	23454685		Intergenic		0.130556		hyper		no
Chr1			23856348	23856779		AT1TE78505:transposable_element;		0.107826		hyper		no
Chr5			8560161	8560454		AT5TE30970:transposable_element;AT5TE30975:transposable_element;		0.233432		hyper		no
Chr3			11197549	11198107		AT3TE46630:transposable_element;		0.157242		hyper		no
Chr1			24917744	24918460		AT1G66790:CDS;AT1TE81850:transposable_element;AT1TE81855:transposable_element;		0.140933		hyper		no
Chr3			21608403	21608649		AT3TE87990:transposable_element;		0.21233		hyper		no
Chr4			486266	486588		AT4G01130:CDS;AT4TE02530:transposable_element;		0.184196		hyper		no
Chr5			3965917	3966159		AT5TE14355:transposable_element;AT5TE14360:transposable_element;		0.131409		hyper		no
Chr3			15350044	15350842		AT3G43425:transposable_element_gene;AT3TE62360:transposable_element;		0.14267		hyper		no
Chr4			6683073	6683916		AT4G10870:CDS;AT4TE28665:transposable_element;		0.12007		hyper		no
Chr1			17837817	17838306		Intergenic		0.105006		hyper		no
Chr4			8808894	8809146		AT4G15396:CDS;		0.145732		hyper		no
Chr3			14951658	14952315		AT3G42875:transposable_element_gene;		0.15174		hyper		no
Chr2			1252202	1252554		Intergenic		0.113384		hyper		no
Chr4			6235127	6235512		AT4G09950:CDS;		0.140095		hyper		no
Chr1			17622052	17622434		AT1G47860:transposable_element_gene;		0.113467		hyper		no
Chr5			9661769	9662053		AT5G27360:CDS;		0.153843		hyper		no
Chr3			11160181	11160667		AT3G29190:CDS;		0.163443		hyper		no
Chr1			8837383	8837651		AT1G25220:three_prime_UTR,CDS;		0.252415		hyper		yes
Chr3			1075284	1075700		AT3G04100:CDS;		0.136305		hyper		no
Chr1			21037746	21038346		AT1TE69450:transposable_element;AT1TE69455:transposable_element;AT1TE69460:transposable_element;		0.108965		hyper		no
Chr5			9604158	9604737		AT5G27260:CDS;		0.113069		hyper		no
Chr5			13609132	13610145		Intergenic		0.134148		hyper		no
Chr3			11396540	11396925		AT3TE47525:transposable_element;		0.184166		hyper		no
Chr2			10570286	10570499		Intergenic		0.147423		hyper		no
Chr1			13846882	13847416		AT1G36630:transposable_element_gene;AT1TE45395:transposable_element;		0.103909		hyper		no
Chr1			25879540	25879636		Intergenic		0.182629		hyper		no
Chr5			19056843	19057328		AT5G46930:CDS;		0.12299		hyper		no
Chr5			11684272	11685036		AT5TE42120:transposable_element;AT5TE42125:transposable_element;		0.101978		hyper		no
Chr2			7708277	7708895		Intergenic		0.174646		hyper		no
Chr3			16341043	16341350		AT3TE66175:transposable_element;		0.122643		hyper		no
Chr2			1246602	1247356		AT2G03960:pseudogene;		0.150151		hyper		no
Chr1			26110958	26111248		Intergenic		0.120517		hyper		no
Chr1			21145020	21145814		Intergenic		0.171085		hyper		no
Chr2			391023	391383		AT2TE01620:transposable_element;		0.1494		hyper		no
Chr4			13580453	13580791		Intergenic		0.119151		hyper		no
Chr1			19024074	19024698		AT1TE63010:transposable_element;AT1TE63015:transposable_element;AT1TE63020:transposable_element;AT1TE63025:transposable_element;		0.103429		hyper		no
Chr4			7422691	7423311		AT4TE32315:transposable_element;		0.349532		hyper		no
Chr3			7949631	7950113		AT3G22421:CDS;		0.105989		hyper		no
Chr5			26259604	26260007		AT5G65676:transposable_element_gene;AT5TE94555:transposable_element;		0.115034		hyper		no
Chr4			154213	154481		AT4TE00800:transposable_element;		0.170047		hyper		no
Chr5			13365631	13365790		Intergenic		0.126079		hyper		no
Chr4			8941949	8942791		Intergenic		0.139652		hyper		no
Chr5			15802069	15802351		AT5G39480:CDS;		0.120944		hyper		no
Chr4			6143916	6144251		AT4G09740:CDS;		0.102632		hyper		no
Chr5			16805997	16806363		Intergenic		0.131759		hyper		no
Chr2			12120796	12121491		AT2TE52790:transposable_element;AT2TE52795:transposable_element;		0.116295		hyper		no
Chr1			17579101	17579782		AT1TE58355:transposable_element;AT1TE58360:transposable_element;		0.10271		hyper		no
Chr3			19672942	19673095		AT3G53065:CDS;		0.244964		hyper		no
Chr2			16370557	16370930		AT2TE73455:transposable_element;AT2TE73460:transposable_element;		0.116945		hyper		no
Chr4			2316559	2317316		Intergenic		0.190488		hyper		no
Chr5			18858840	18859135		AT5TE67900:transposable_element;		0.106711		hyper		no
Chr2			15389500	15389953		AT2G36710:three_prime_UTR,CDS;		0.102909		hyper		no
Chr1			24897253	24897724		AT1G66750:three_prime_UTR;AT1TE81795:transposable_element;AT1TE81800:transposable_element;		0.116407		hyper		no
Chr3			8497018	8497149		AT3G23633:CDS;		0.111534		hyper		no
Chr1			16148232	16148466		AT1TE53195:transposable_element;AT1TE53200:transposable_element;		0.134092		hyper		no
Chr2			15332699	15333294		AT2TE68320:transposable_element;AT2TE68325:transposable_element;		0.151815		hyper		no
Chr5			15984420	15984903		AT5TE57705:transposable_element;		0.128417		hyper		no
Chr3			15048055	15048586		AT3G43005:transposable_element_gene;AT3TE61290:transposable_element;AT3TE61315:transposable_element;		0.122616		hyper		no
Chr5			17080968	17081212		Intergenic		0.101637		hyper		no
Chr4			5600481	5601281		AT4TE23460:transposable_element;AT4TE23465:transposable_element;AT4TE23470:transposable_element;		0.113796		hyper		no
Chr2			9738505	9738827		Intergenic		0.166899		hyper		no
Chr4			179059	179484		AT4G00416:CDS;		0.118975		hyper		no
Chr1			1598452	1598756		Intergenic		0.157148		hyper		no
Chr2			16010460	16010805		AT2G38220:three_prime_UTR,CDS;AT2TE71670:transposable_element;		0.199771		hyper		no
Chr2			7503681	7504574		AT2TE30820:transposable_element;AT2TE30825:transposable_element;AT2TE30830:transposable_element;		0.133438		hyper		no
Chr2			9717355	9717624		AT2TE41470:transposable_element;		0.114165		hyper		no
Chr2			6961865	6962180		AT2TE28340:transposable_element;		0.142034		hyper		no
Chr5			14715807	14716048		AT5G37175:transposable_element_gene;AT5TE53035:transposable_element;		0.152736		hyper		no
Chr4			8907027	8907318		AT4G15590:transposable_element_gene;AT4TE39815:transposable_element;AT4TE39820:transposable_element;AT4TE39825:transposable_element;AT4TE39830:transposable_element;		0.106313		hyper		no
Chr3			16887776	16888068		AT3G45940:CDS;		0.146591		hyper		no
Chr5			3560445	3561040		AT5G11180:CDS;		0.14404		hyper		no
Chr1			20548057	20548150		AT1TE67880:transposable_element;		0.214534		hyper		no
Chr5			11192673	11192928		AT5TE40505:transposable_element;		0.126193		hyper		no
Chr5			11035874	11036326		AT5G29015:transposable_element_gene;AT5TE40080:transposable_element;AT5TE40085:transposable_element;		0.125387		hyper		no
Chr4			1759127	1760351		AT4TE08820:transposable_element;AT4TE08825:transposable_element;		0.171108		hyper		no
Chr1			17938941	17939282		AT1TE59545:transposable_element;		0.160248		hyper		no
Chr3			8397383	8397776		Intergenic		0.122004		hyper		no
Chr1			11089284	11089784		AT1G31072:pseudogene;AT1TE35820:transposable_element;AT1TE35825:transposable_element;AT1TE35830:transposable_element;		0.110707		hyper		no
Chr3			7738873	7739266		AT3G21960:three_prime_UTR,CDS;		0.144561		hyper		no
Chr2			1745783	1746187		AT2G04970:transposable_element_gene;AT2TE08110:transposable_element;		0.129764		hyper		no
Chr1			21068725	21069154		Intergenic		0.149671		hyper		no
Chr3			13988391	13989183		AT3TE57400:transposable_element;AT3TE57405:transposable_element;		0.14866		hyper		no
Chr5			22020490	22021294		AT5TE79260:transposable_element;AT5TE79265:transposable_element;AT5TE79270:transposable_element;		0.1535		hyper		no
Chr3			23085596	23086077		AT3TE94135:transposable_element;		0.160529		hyper		no
Chr5			25856197	25856668		AT5G64685:transposable_element_gene;AT5TE93055:transposable_element;		0.10015		hyper		no
Chr1			9283570	9283612		AT1TE29920:transposable_element;		0.17799		hyper		no
Chr2			819021	819428		Intergenic		0.100282		hyper		no
Chr4			2136673	2137153		AT4G04375:pseudogene;		0.118839		hyper		no
Chr5			21224415	21224751		Intergenic		0.178375		hyper		no
Chr4			3820531	3821095		AT4G06650:transposable_element_gene;AT4TE16845:transposable_element;		0.122754		hyper		no
Chr4			6625680	6626146		AT4TE28365:transposable_element;		0.169309		hyper		no
Chr3			18884095	18884504		AT3TE76570:transposable_element;		0.183955		hyper		no
Chr4			12862443	12862923		AT4TE60120:transposable_element;		0.1113		hyper		no
Chr3			16396254	16396503		AT3TE66405:transposable_element;		0.121746		hyper		no
Chr5			22186653	22187029		Intergenic		0.151203		hyper		no
Chr1			20684712	20685012		AT1G55400:transposable_element_gene;AT1TE68310:transposable_element;		0.103121		hyper		no
Chr1			20776888	20777611		Intergenic		0.126907		hyper		no
Chr3			17860905	17862064		AT3TE72355:transposable_element;AT3TE72360:transposable_element;		0.131925		hyper		no
Chr4			6345831	6346146		AT4TE27035:transposable_element;		0.118959		hyper		no
Chr2			4470119	4470532		AT2G11235:transposable_element_gene;AT2TE18710:transposable_element;AT2TE18725:transposable_element;		0.122616		hyper		no
Chr2			2062009	2062544		AT2TE09410:transposable_element;		0.119696		hyper		no
Chr4			1396872	1397647		AT4TE07115:transposable_element;		0.120889		hyper		no
Chr5			9880227	9880603		AT5G27870:CDS;		0.182193		hyper		no
Chr3			16479764	16480006		AT3TE66810:transposable_element;		0.202208		hyper		no
Chr4			7899552	7900107		AT4TE34705:transposable_element;		0.157847		hyper		no
Chr2			11713834	11714125		AT2G27380:CDS;		0.10981		hyper		no
Chr1			8740859	8741383		AT1G24686:pseudogene;		0.106683		hyper		no
Chr1			17489198	17489531		AT1G47595:pseudogene;		0.122693		hyper		no
Chr4			2876445	2876898		Intergenic		0.158183		hyper		no
Chr1			24041939	24042344		AT1TE79070:transposable_element;		0.157422		hyper		no
Chr3			3817502	3817849		AT3G11990:CDS;		0.11882		hyper		no
Chr4			7577832	7578359		AT4TE33095:transposable_element;AT4TE33100:transposable_element;		0.185794		hyper		no
Chr4			8947888	8948477		Intergenic		0.116386		hyper		no
Chr3			16831764	16832106		AT3G45800:CDS;AT3TE68155:transposable_element;		0.11049		hyper		no
Chr3			9060194	9060803		AT3TE37855:transposable_element;AT3TE37860:transposable_element;		0.124396		hyper		no
Chr5			15694560	15694858		AT5G39200:CDS;		0.214309		hyper		no
Chr1			18906950	18907537		AT1TE62635:transposable_element;		0.139675		hyper		no
Chr5			8241927	8241946		AT5G24270:mRNA;		0.306956		hyper		no
Chr1			13114383	13114739		AT1TE42835:transposable_element;		0.147546		hyper		no
Chr5			6360828	6361279		Intergenic		0.23428		hyper		no
Chr2			7381225	7381888		Intergenic		0.125618		hyper		no
Chr5			19710396	19710830		AT5G48605:CDS;		0.107558		hyper		no
Chr5			24819137	24819538		AT5TE89325:transposable_element;		0.287455		hyper		no
Chr4			6035787	6036093		AT4G09540:transposable_element_gene;AT4TE25430:transposable_element;		0.125165		hyper		no
Chr3			15895838	15896248		AT3G44171:CDS;AT3TE64335:transposable_element;AT3TE64340:transposable_element;		0.198489		hyper		no
Chr5			7378026	7378672		Intergenic		0.209665		hyper		no
Chr1			22872989	22873584		AT1TE75405:transposable_element;		0.137064		hyper		no
Chr2			6830204	6830588		Intergenic		0.309005		hyper		no
Chr2			8956949	8957101		AT2TE37765:transposable_element;		0.131804		hyper		no
Chr3			20202789	20203338		AT3G54580:CDS;		0.122064		hyper		no
Chr4			1610618	1611104		AT4TE08200:transposable_element;		0.240753		hyper		no
Chr1			17441278	17441529		Intergenic		0.114809		hyper		no
Chr3			14326430	14326885		AT3G42180:three_prime_UTR,CDS;		0.128846		hyper		no
Chr2			12309702	12309936		Intergenic		0.21156		hyper		no
Chr5			9223436	9224270		AT5TE33335:transposable_element;AT5TE33340:transposable_element;		0.178203		hyper		no
Chr2			14108854	14109629		AT2TE62350:transposable_element;		0.167034		hyper		no
Chr5			16393319	16393578		AT5G40900:CDS;		0.117524		hyper		no
Chr5			18931497	18931613		Intergenic		0.169997		hyper		no
Chr4			8138346	8138566		Intergenic		0.185586		hyper		no
Chr4			5705846	5706318		AT4TE23865:transposable_element;AT4TE23870:transposable_element;AT4TE23875:transposable_element;		0.263799		hyper		no
Chr4			13038248	13038583		AT4G25530:five_prime_UTR;		0.10121		hyper		no
Chr1			19592993	19593373		Intergenic		0.110457		hyper		no
Chr5			14280206	14281068		AT5TE51035:transposable_element;		0.117627		hyper		no
Chr4			2384270	2384572		Intergenic		0.18715		hyper		no
Chr1			12946376	12947020		AT1G35280:transposable_element_gene;AT1TE42210:transposable_element;AT1TE42215:transposable_element;		0.129404		hyper		no
Chr1			17139243	17140002		AT1G45221:three_prime_UTR,CDS,five_prime_UTR;AT1TE56755:transposable_element;AT1TE56760:transposable_element;AT1TE56765:transposable_element;		0.161777		hyper		no
Chr1			13375248	13375954		AT1G35930:transposable_element_gene;AT1TE43740:transposable_element;		0.118138		hyper		no
Chr3			10044759	10045190		AT3G27210:three_prime_UTR;		0.13491		hyper		no
Chr3			8615381	8615609		AT3G23850:CDS;		0.175699		hyper		no
Chr2			10554253	10554943		AT2TE45295:transposable_element;		0.213834		hyper		no
Chr2			11693986	11694390		AT2G27320:CDS;		0.10127		hyper		no
Chr3			18585186	18585564		AT3G50120:CDS;		0.178258		hyper		no
Chr5			17210671	17210920		AT5G42930:three_prime_UTR,CDS;		0.169027		hyper		no
Chr4			6860718	6861227		Intergenic		0.116754		hyper		no
Chr3			16745306	16745546		Intergenic		0.146314		hyper		no
Chr5			17543105	17543671		AT5TE63425:transposable_element;		0.151107		hyper		no
Chr5			14780251	14780923		AT5TE53290:transposable_element;AT5TE53295:transposable_element;AT5TE53300:transposable_element;		0.120329		hyper		no
Chr1			6514233	6514639		AT1TE21120:transposable_element;AT1TE21125:transposable_element;AT1TE21130:transposable_element;		0.158864		hyper		no
Chr1			12497398	12497633		Intergenic		0.166426		hyper		no
Chr1			20859881	20860144		Intergenic		0.185509		hyper		no
Chr4			12561137	12561666		AT4TE58530:transposable_element;AT4TE58535:transposable_element;		0.185192		hyper		no
Chr5			14611810	14612658		AT5TE52550:transposable_element;AT5TE52555:transposable_element;AT5TE52560:transposable_element;AT5TE52565:transposable_element;		0.138497		hyper		no
Chr4			7213974	7214213		AT4TE31405:transposable_element;		0.126223		hyper		no
Chr3			14592431	14593073		AT3TE59750:transposable_element;		0.129092		hyper		no
Chr4			5922201	5922741		AT4TE24945:transposable_element;		0.130537		hyper		no
ChrM			162021	162259		no match		0.199092		hyper		no
Chr5			1654932	1655257		Intergenic		0.110705		hyper		no
Chr4			10350896	10351443		AT4TE47220:transposable_element;AT4TE47225:transposable_element;		0.178038		hyper		no
Chr5			9698727	9699201		AT5TE35180:transposable_element;AT5TE35185:transposable_element;		0.111932		hyper		no
Chr3			874516	874985		AT3G03620:CDS;		0.135257		hyper		no
Chr4			4072820	4073065		AT4TE17640:transposable_element;		0.134959		hyper		no
Chr5			22165180	22165357		Intergenic		0.199488		hyper		no
Chr5			13349720	13349938		AT5G35076:transposable_element_gene;AT5TE47280:transposable_element;		0.108923		hyper		no
Chr5			20473466	20473928		Intergenic		0.116374		hyper		no
Chr4			11870707	11871546		AT4TE54920:transposable_element;		0.168902		hyper		no
Chr5			24722706	24723071		AT5G61470:CDS;		0.129864		hyper		no
Chr1			21021092	21021450		AT1TE69405:transposable_element;		0.172362		hyper		no
Chr3			10999812	11000244		Intergenic		0.172996		hyper		no
Chr5			22322758	22322865		Intergenic		0.214179		hyper		no
Chr1			9958542	9958804		AT1TE32110:transposable_element;		0.132863		hyper		no
ChrM			125514	125697		no match		0.219727		hyper		no
Chr2			8939438	8939598		AT2TE37680:transposable_element;		0.206469		hyper		no
Chr5			4314132	4314705		AT5TE15610:transposable_element;		0.163274		hyper		no
Chr2			12833237	12833719		AT2TE56135:transposable_element;		0.164521		hyper		no
Chr2			1198460	1199002		Intergenic		0.163153		hyper		no
Chr5			13101485	13101993		AT5G34852:pseudogene;AT5TE46620:transposable_element;AT5TE46625:transposable_element;		0.208729		hyper		no
Chr5			9013094	9013400		AT5TE32625:transposable_element;		0.127295		hyper		no
Chr1			9018266	9018447		Intergenic		0.14001		hyper		no
Chr1			24718904	24719358		AT1TE81195:transposable_element;AT1TE81200:transposable_element;AT1TE81205:transposable_element;		0.221504		hyper		no
Chr5			9238795	9239160		AT5G26320:CDS;AT5TE33420:transposable_element;AT5TE33425:transposable_element;		0.166758		hyper		no
Chr3			8452638	8452836		Intergenic		0.108655		hyper		no
Chr2			4348666	4348763		AT2G11005:CDS;		0.109707		hyper		no
Chr1			11686201	11686716		Intergenic		0.153738		hyper		no
Chr1			21872087	21873354		AT1TE72160:transposable_element;AT1TE72165:transposable_element;AT1TE72170:transposable_element;		0.117396		hyper		no
Chr5			8156535	8156701		AT5TE29520:transposable_element;		0.106222		hyper		no
Chr4			16059243	16059592		Intergenic		0.107989		hyper		no
Chr2			5936480	5936729		AT2TE24185:transposable_element;		0.19733		hyper		no
Chr1			20524824	20525075		Intergenic		0.104176		hyper		no
Chr4			594923	595512		AT4TE03110:transposable_element;		0.124679		hyper		no
Chr5			8675442	8675594		AT5TE31350:transposable_element;		0.187665		hyper		no
Chr3			9313742	9314083		Intergenic		0.123455		hyper		no
Chr2			5835417	5835695		Intergenic		0.113967		hyper		no
Chr3			18569291	18569685		Intergenic		0.172282		hyper		no
Chr3			18295980	18296173		AT3TE74215:transposable_element;		0.342196		hyper		no
Chr1			6302653	6302993		AT1G18310:CDS;AT1TE20410:transposable_element;		0.116114		hyper		no
Chr2			5422052	5422391		Intergenic		0.159663		hyper		no
Chr3			10854215	10854715		AT3G28855:transposable_element_gene;AT3TE45120:transposable_element;AT3TE45125:transposable_element;		0.11931		hyper		no
Chr2			5392863	5393206		Intergenic		0.207778		hyper		no
Chr3			3478534	3479026		AT3TE14615:transposable_element;		0.148081		hyper		no
Chr5			13921260	13921993		AT5TE49635:transposable_element;		0.120695		hyper		no
Chr5			15637185	15637714		AT5G39060:transposable_element_gene;AT5TE56560:transposable_element;		0.102754		hyper		no
Chr3			3686925	3687239		AT3G11680:CDS;		0.104466		hyper		no
Chr1			28707000	28707287		Intergenic		0.107442		hyper		no
Chr2			6030955	6031187		AT2G14245:transposable_element_gene;AT2TE24525:transposable_element;AT2TE24530:transposable_element;		0.165648		hyper		no
Chr4			7708475	7708868		AT4G13261:CDS;		0.106998		hyper		no
Chr2			8529089	8529600		AT2TE35680:transposable_element;AT2TE35685:transposable_element;		0.142545		hyper		no
Chr3			8414943	8415164		AT3G23470:mRNA;		0.134894		hyper		no
Chr4			7881127	7881889		Intergenic		0.137756		hyper		no
Chr1			24338150	24338340		Intergenic		0.149249		hyper		no
Chr5			21620814	21621216		Intergenic		0.170079		hyper		no
Chr3			11112407	11112797		AT3TE46230:transposable_element;		0.149361		hyper		no
Chr5			23417621	23418068		Intergenic		0.190114		hyper		no
Chr1			18009995	18010198		Intergenic		0.139095		hyper		no
Chr1			22182808	22183017		AT1G60150:transposable_element_gene;AT1TE73260:transposable_element;		0.102735		hyper		no
Chr5			16716373	16716844		AT5G41765:CDS;		0.108455		hyper		no
Chr5			15865108	15865331		AT5G39620:CDS;AT5TE57280:transposable_element;		0.109719		hyper		no
Chr1			21114696	21115130		Intergenic		0.120563		hyper		no
Chr2			786170	786582		AT2TE03460:transposable_element;AT2TE03465:transposable_element;		0.256529		hyper		no
Chr5			10612228	10612432		AT5G28615:CDS;		0.111896		hyper		no
Chr1			18506890	18507412		AT1TE61335:transposable_element;		0.111117		hyper		no
Chr5			17976168	17976614		Intergenic		0.135184		hyper		no
Chr3			15089701	15090208		AT3G43100:transposable_element_gene;AT3TE61480:transposable_element;		0.131129		hyper		no
Chr3			18747115	18747346		AT3TE76040:transposable_element;		0.100374		hyper		no
Chr1			11984583	11984872		AT1G33070:CDS;		0.112155		hyper		no
Chr3			10483860	10484138		Intergenic		0.112754		hyper		no
Chr5			17252988	17253311		AT5G43015:transposable_element_gene;AT5TE62355:transposable_element;		0.104051		hyper		no
Chr3			4727364	4728439		AT3TE19950:transposable_element;		0.133265		hyper		no
Chr4			7735548	7735843		AT4G13280:CDS;AT4TE33910:transposable_element;		0.116921		hyper		no
Chr1			8043836	8044222		AT1TE25880:transposable_element;		0.117491		hyper		no
Chr4			11684495	11684721		AT4G22050:CDS;		0.121636		hyper		no
Chr2			7527686	7527997		AT2G17305:CDS;		0.140673		hyper		no
Chr5			24703324	24703934		AT5TE88895:transposable_element;		0.165146		hyper		no
Chr5			15579139	15579417		AT5G38910:CDS;		0.114368		hyper		no
Chr2			796058	796256		AT2G02795:CDS;AT2G02800:mRNA;		0.177027		hyper		no
Chr3			15996758	15996987		AT3G44325:transposable_element_gene;AT3TE64755:transposable_element;AT3TE64760:transposable_element;		0.110946		hyper		no
Chr5			8873750	8873919		Intergenic		0.113735		hyper		no
Chr5			25859967	25860362		AT5TE93060:transposable_element;AT5TE93065:transposable_element;		0.163477		hyper		no
Chr5			12915517	12916042		AT5TE45965:transposable_element;AT5TE45970:transposable_element;		0.144519		hyper		no
Chr4			8810957	8811407		AT4TE39360:transposable_element;		0.130823		hyper		no
Chr5			9253729	9254019		AT5TE33455:transposable_element;AT5TE33460:transposable_element;		0.134312		hyper		no
Chr1			10659344	10660019		Intergenic		0.118848		hyper		no
Chr4			692515	692687		AT4TE03570:transposable_element;		0.100683		hyper		no
Chr2			9382310	9382492		AT2TE39830:transposable_element;		0.155871		hyper		no
Chr3			10584037	10584714		AT3TE44010:transposable_element;		0.156134		hyper		no
Chr2			11683214	11683330		AT2TE50750:transposable_element;		0.190435		hyper		no
Chr3			8219787	8220163		AT3TE34480:transposable_element;AT3TE34485:transposable_element;		0.126765		hyper		no
Chr1			11323663	11323882		AT1G31640:CDS;		0.113923		hyper		no
Chr3			20209213	20209567		AT3TE82140:transposable_element;		0.100676		hyper		no
Chr1			23553814	23554079		AT1TE77560:transposable_element;		0.161188		hyper		no
Chr2			10873176	10873889		AT2TE46725:transposable_element;AT2TE46730:transposable_element;		0.134648		hyper		no
Chr1			9253758	9254255		AT1G26762:three_prime_UTR,CDS;		0.106814		hyper		no
Chr5			14039243	14039516		AT5TE50045:transposable_element;		0.102471		hyper		no
Chr1			11707866	11708606		AT1TE37925:transposable_element;		0.15941		hyper		no
Chr1			17520778	17520962		AT1G47650:transposable_element_gene;AT1TE58075:transposable_element;		0.10256		hyper		no
Chr5			13604254	13604800		AT5G35405:three_prime_UTR,CDS;		0.142004		hyper		no
Chr2			485449	485956		AT2TE02080:transposable_element;		0.157239		hyper		no
Chr5			2441382	2441783		AT5G07685:transposable_element_gene;AT5TE08870:transposable_element;		0.158901		hyper		no
Chr4			2654353	2654607		AT4G05145:transposable_element_gene;AT4TE12385:transposable_element;AT4TE12390:transposable_element;		0.127601		hyper		no
Chr1			10920751	10921066		AT1TE35270:transposable_element;AT1TE35275:transposable_element;		0.102799		hyper		no
Chr5			13626671	13627019		AT5TE48460:transposable_element;		0.100242		hyper		no
Chr3			11818018	11818423		Intergenic		0.14729		hyper		no
Chr1			10983132	10983341		AT1TE35465:transposable_element;		0.110414		hyper		no
Chr2			10749066	10749580		AT2TE46125:transposable_element;AT2TE46130:transposable_element;		0.187916		hyper		no
Chr1			9283103	9283245		AT1TE29920:transposable_element;		0.132401		hyper		no
Chr3			16943609	16944011		Intergenic		0.102993		hyper		no
Chr4			18250222	18250654		AT4TE88425:transposable_element;		0.108052		hyper		no
Chr1			13360615	13360732		AT1TE43705:transposable_element;		0.161189		hyper		no
Chr5			12440770	12441324		Intergenic		0.125413		hyper		no
Chr1			428015	428236		Intergenic		0.122463		hyper		no
Chr3			16346791	16347425		Intergenic		0.164151		hyper		no
Chr4			9688237	9688595		AT4TE43835:transposable_element;		0.171729		hyper		no
Chr4			7752128	7752532		AT4G13310:CDS;AT4TE33970:transposable_element;AT4TE33975:transposable_element;		0.144231		hyper		no
Chr5			21785559	21785855		AT5TE78480:transposable_element;		0.138292		hyper		no
Chr2			8157361	8157657		AT2TE33895:transposable_element;AT2TE33900:transposable_element;		0.117138		hyper		no
Chr5			10491891	10492281		AT5G28515:transposable_element_gene;AT5TE38265:transposable_element;		0.124765		hyper		no
Chr1			1250287	1250873		Intergenic		0.173451		hyper		no
Chr5			5717337	5717462		AT5TE20680:transposable_element;		0.108477		hyper		no
Chr4			12435038	12435289		AT4TE57850:transposable_element;		0.101044		hyper		no
Chr5			9181733	9182063		AT5TE33235:transposable_element;		0.14348		hyper		no
Chr3			11036725	11037065		Intergenic		0.118354		hyper		no
Chr4			46731	47123		Intergenic		0.144676		hyper		no
Chr1			8492511	8492867		AT1G23990:transposable_element_gene;AT1TE27405:transposable_element;		0.100905		hyper		no
Chr5			8945025	8945640		AT5TE32380:transposable_element;		0.10418		hyper		no
Chr1			24564599	24565130		AT1G65985:CDS;AT1TE80685:transposable_element;AT1TE80690:transposable_element;		0.149301		hyper		no
Chr1			19763040	19763351		AT1TE65330:transposable_element;		0.145171		hyper		no
Chr2			10318535	10318704		Intergenic		0.112839		hyper		no
Chr4			5168488	5169038		AT4G08176:CDS;AT4TE21475:transposable_element;		0.141801		hyper		no
Chr5			20773311	20773466		AT5G51100:three_prime_UTR,CDS;		0.226635		hyper		no
Chr4			17026112	17026304		Intergenic		0.12054		hyper		no
Chr1			11371011	11371279		AT1G31750:CDS;		0.130328		hyper		no
Chr1			21476484	21476648		AT1G58040:transposable_element_gene;AT1TE70875:transposable_element;		0.132956		hyper		no
Chr4			7143752	7144076		AT4G11880:CDS;		0.172152		hyper		no
Chr1			7729755	7729957		AT1TE24865:transposable_element;		0.10485		hyper		no
Chr4			1747654	1748013		AT4G03800:transposable_element_gene;AT4TE08745:transposable_element;		0.111578		hyper		no
Chr2			5872708	5873092		AT2TE23925:transposable_element;		0.185211		hyper		no
Chr5			10287813	10288107		AT5TE37575:transposable_element;		0.195076		hyper		no
Chr3			16625895	16626416		Intergenic		0.108443		hyper		no
Chr5			26613487	26613982		Intergenic		0.101379		hyper		no
Chr3			7041098	7041361		AT3TE29575:transposable_element;		0.152272		hyper		no
Chr5			7728803	7729126		Intergenic		0.104518		hyper		no
Chr4			738451	738836		AT4TE03790:transposable_element;		0.118207		hyper		no
Chr3			5278051	5278256		AT3TE22200:transposable_element;		0.131004		hyper		no
Chr3			16011269	16011434		Intergenic		0.174147		hyper		no
Chr2			10623591	10624205		AT2G24980:CDS;AT2TE45520:transposable_element;		0.122855		hyper		no
Chr3			18412505	18413198		AT3TE74700:transposable_element;		0.119592		hyper		no
Chr5			22537975	22538278		AT5TE81105:transposable_element;		0.113663		hyper		no
Chr5			7823677	7824130		Intergenic		0.175079		hyper		no
Chr5			16706288	16706557		Intergenic		0.175069		hyper		no
Chr4			5564311	5564614		Intergenic		0.143089		hyper		no
Chr4			5375133	5375248		Intergenic		0.10858		hyper		no
Chr1			19767951	19768282		AT1TE65360:transposable_element;		0.127456		hyper		no
Chr5			9800997	9801566		AT5TE35645:transposable_element;AT5TE35650:transposable_element;		0.159714		hyper		no
Chr1			13473574	13473934		AT1TE44080:transposable_element;AT1TE44085:transposable_element;		0.124488		hyper		no
Chr2			11669263	11669620		Intergenic		0.100877		hyper		no
Chr4			8593153	8593468		AT4G15053:CDS;		0.10735		hyper		no
Chr2			9339004	9339137		Intergenic		0.133968		hyper		no
Chr5			14180801	14181166		AT5TE50620:transposable_element;		0.100338		hyper		no
Chr2			5751967	5752425		AT2TE23340:transposable_element;AT2TE23345:transposable_element;		0.107525		hyper		no
Chr4			6046182	6046872		AT4G09565:transposable_element_gene;AT4TE25480:transposable_element;AT4TE25485:transposable_element;AT4TE25490:transposable_element;AT4TE25495:transposable_element;		0.106428		hyper		no
Chr4			16428184	16428426		Intergenic		0.104847		hyper		no
Chr2			14009433	14009636		AT2TE61850:transposable_element;AT2TE61855:transposable_element;		0.169359		hyper		no
Chr5			1686849	1687024		AT5G05650:CDS;AT5TE06100:transposable_element;		0.119434		hyper		no
Chr5			15161734	15161820		AT5TE54875:transposable_element;		0.138115		hyper		no
Chr1			12316042	12316309		AT1G33910:CDS;		0.121728		hyper		no
Chr5			6666152	6666506		Intergenic		0.186345		hyper		no
Chr3			17276888	17277418		AT3TE70035:transposable_element;		0.127933		hyper		no
Chr1			21230907	21231262		Intergenic		0.2102		hyper		no
Chr1			17685539	17686013		AT1TE58725:transposable_element;		0.122517		hyper		no
Chr5			18512462	18512875		AT5TE66620:transposable_element;		0.118592		hyper		no
Chr2			2965885	2966719		AT2TE12930:transposable_element;		0.148749		hyper		no
Chr1			23931961	23932302		AT1G64410:transposable_element_gene;AT1TE78740:transposable_element;		0.108539		hyper		no
Chr2			192143	192372		AT2TE00730:transposable_element;		0.135345		hyper		no
Chr2			6795296	6795835		Intergenic		0.154757		hyper		no
Chr4			712888	713016		AT4TE03670:transposable_element;		0.127776		hyper		no
Chr5			17003598	17004044		Intergenic		0.129014		hyper		no
Chr5			17290952	17291135		Intergenic		0.144101		hyper		no
Chr1			16898958	16899453		Intergenic		0.307624		hyper		no
Chr1			27603322	27603505		AT1TE90315:transposable_element;		0.166212		hyper		no
Chr3			18616978	18617088		AT3TE75520:transposable_element;		0.254393		hyper		no
Chr5			10428017	10428190		Intergenic		0.144899		hyper		no
Chr2			10181239	10181503		Intergenic		0.120339		hyper		no
Chr2			962959	963259		AT2G03180:CDS;		0.164363		hyper		no
Chr1			23679909	23680167		Intergenic		0.127907		hyper		no
Chr2			1168161	1168487		AT2G03821:five_prime_UTR;AT2G03822:CDS;		0.107935		hyper		no
Chr2			10549968	10550323		AT2G24761:pseudogene;		0.105742		hyper		no
Chr3			14748320	14748638		Intergenic		0.135212		hyper		no
Chr4			1877812	1878172		AT4G03945:CDS,five_prime_UTR;AT4TE09240:transposable_element;AT4TE09245:transposable_element;		0.11271		hyper		no
Chr5			14606207	14606462		AT5TE52500:transposable_element;		0.136276		hyper		no
Chr3			17205512	17205817		AT3TE69725:transposable_element;		0.113624		hyper		no
Chr1			22409467	22409792		AT1G60870:CDS,five_prime_UTR;		0.174496		hyper		no
Chr3			22366587	22366785		Intergenic		0.139151		hyper		no
Chr3			10510914	10511481		AT3TE43660:transposable_element;		0.129361		hyper		no
Chr1			22626219	22626543		AT1TE74615:transposable_element;		0.144013		hyper		no
Chr2			8560603	8560839		AT2TE35830:transposable_element;AT2TE35835:transposable_element;		0.138594		hyper		no
Chr5			8819351	8819497		AT5TE31885:transposable_element;AT5TE31920:transposable_element;AT5TE31925:transposable_element;		0.188872		hyper		no
Chr2			9419300	9419735		AT2TE40020:transposable_element;		0.18864		hyper		no
Chr3			18519291	18519621		AT3TE75115:transposable_element;AT3TE75120:transposable_element;		0.100426		hyper		no
Chr2			1940730	1941211		AT2TE08905:transposable_element;AT2TE08915:transposable_element;		0.136999		hyper		no
Chr2			14653532	14653726		AT2TE65005:transposable_element;		0.148487		hyper		no
Chr4			16050123	16050311		AT4G33290:CDS;		0.11993		hyper		no
Chr1			26084554	26084718		AT1G69390:five_prime_UTR;		0.104611		hyper		no
Chr4			13472993	13473133		AT4G26730:CDS;		0.16461		hyper		no
Chr2			18797612	18798016		Intergenic		0.167874		hyper		no
Chr4			8295090	8295480		AT4G14400:CDS;AT4TE36760:transposable_element;		0.128321		hyper		no
Chr2			8696932	8697129		AT2TE36460:transposable_element;		0.110749		hyper		no
Chr1			21172700	21173003		AT1G56510:mRNA;AT1TE69990:transposable_element;		0.11539		hyper		no
Chr5			22491550	22491888		AT5TE80970:transposable_element;		0.13741		hyper		no
Chr2			10255286	10255821		AT2TE43875:transposable_element;AT2TE43880:transposable_element;		0.101236		hyper		no
Chr1			17640793	17641263		AT1G47880:pseudogene;		0.181387		hyper		no
Chr2			1403151	1403292		AT2G04160:CDS;		0.144838		hyper		no
Chr4			683832	684362		AT4TE03530:transposable_element;		0.139265		hyper		no
Chr2			287816	287919		Intergenic		0.135164		hyper		no
Chr2			3412258	3412439		AT2G07715:CDS;		0.110071		hyper		no
Chr5			18164911	18165229		Intergenic		0.111826		hyper		no
Chr4			2471329	2471567		AT4TE11525:transposable_element;AT4TE11530:transposable_element;		0.172847		hyper		no
Chr2			16142976	16143388		AT2G38590:CDS;		0.145152		hyper		no
Chr1			26525767	26526245		AT1G70380:CDS;		0.138415		hyper		no
Chr2			1048049	1048304		AT2TE04670:transposable_element;		0.201333		hyper		no
Chr4			10180847	10181176		Intergenic		0.105617		hyper		no
Chr5			11496769	11497212		AT5G32162:transposable_element_gene;		0.175584		hyper		no
Chr5			26974306	26975166		Intergenic		0.108825		hyper		no
Chr1			25976224	25976421		AT1TE85105:transposable_element;		0.142574		hyper		no
Chr3			16726543	16726788		AT3TE67795:transposable_element;		0.116149		hyper		no
Chr5			10338135	10338247		AT5TE37750:transposable_element;		0.12759		hyper		no
Chr1			20367172	20367282		AT1TE67290:transposable_element;		0.144422		hyper		no
Chr1			17862876	17863419		Intergenic		0.157053		hyper		no
Chr1			9811689	9811837		Intergenic		0.169849		hyper		no
Chr5			1410753	1411220		Intergenic		0.119445		hyper		no
Chr2			238074	238335		AT2TE00960:transposable_element;AT2TE00965:transposable_element;		0.106005		hyper		no
Chr5			14990575	14990992		Intergenic		0.229236		hyper		no
Chr5			26835483	26835678		AT5TE96670:transposable_element;		0.203942		hyper		no
Chr2			1965340	1965621		AT2TE09070:transposable_element;		0.150235		hyper		no
Chr4			954278	954728		AT4TE04850:transposable_element;		0.157517		hyper		no
Chr2			9379115	9379346		AT2TE39820:transposable_element;		0.152135		hyper		no
Chr1			17819732	17820311		AT1TE59150:transposable_element;AT1TE59155:transposable_element;		0.196923		hyper		no
Chr1			18671332	18671768		AT1TE61870:transposable_element;		0.115507		hyper		no
Chr5			7488016	7488340		AT5TE27070:transposable_element;AT5TE27075:transposable_element;		0.154215		hyper		no
Chr4			4107331	4107689		AT4G07031:transposable_element_gene;AT4TE17790:transposable_element;		0.155272		hyper		no
Chr3			9936163	9936525		Intergenic		0.150451		hyper		no
Chr1			22206736	22207360		AT1TE73345:transposable_element;		0.15797		hyper		no
Chr3			10038664	10038855		AT3TE41795:transposable_element;		0.130273		hyper		no
Chr3			16993699	16994456		AT3TE68875:transposable_element;		0.131227		hyper		no
Chr4			4794447	4794742		AT4TE19980:transposable_element;		0.120518		hyper		no
Chr3			17176631	17176924		Intergenic		0.163395		hyper		no
Chr3			4276605	4276856		AT3G13250:transposable_element_gene;AT3TE18040:transposable_element;		0.127671		hyper		no
Chr1			25331949	25332230		AT1TE83130:transposable_element;		0.141127		hyper		no
Chr4			6357006	6357659		AT4G10201:pseudogene;AT4G10210:CDS,five_prime_UTR;AT4TE27075:transposable_element;AT4TE27080:transposable_element;		0.101043		hyper		no
Chr1			13038951	13039337		AT1TE42555:transposable_element;		0.105793		hyper		no
Chr1			26031835	26032023		AT1TE85290:transposable_element;		0.110428		hyper		no
Chr4			7810913	7811415		AT4TE34260:transposable_element;AT4TE34265:transposable_element;		0.134767		hyper		no
Chr3			756454	756931		AT3G03260:CDS;		0.106543		hyper		no
Chr5			16588049	16588491		AT5TE59905:transposable_element;		0.139067		hyper		no
Chr2			1613151	1613529		AT2TE07450:transposable_element;		0.177243		hyper		no
Chr4			16794412	16794826		AT4TE80770:transposable_element;		0.101432		hyper		no
Chr5			14864766	14865034		AT5TE53580:transposable_element;		0.144337		hyper		no
Chr4			7293620	7294035		AT4G12260:transposable_element_gene;AT4TE31745:transposable_element;AT4TE31750:transposable_element;		0.160143		hyper		no
Chr4			6599029	6599623		AT4TE28225:transposable_element;AT4TE28230:transposable_element;		0.120734		hyper		no
Chr4			8564141	8564492		AT4TE38095:transposable_element;		0.104856		hyper		no
Chr3			9838950	9839273		AT3G26747:tRNA;AT3TE40950:transposable_element;AT3TE40955:transposable_element;AT3TE40960:transposable_element;		0.110709		hyper		no
Chr5			7430796	7431179		AT5G22420:CDS;AT5TE26870:transposable_element;		0.10673		hyper		no
Chr2			7836383	7836652		Intergenic		0.133352		hyper		no
Chr5			3750567	3751018		AT5TE13605:transposable_element;		0.103414		hyper		no
Chr1			3343434	3343877		AT1G10190:three_prime_UTR,CDS;AT1TE10870:transposable_element;AT1TE10875:transposable_element;		0.100333		hyper		no
Chr2			1672160	1672445		AT2TE07745:transposable_element;		0.126718		hyper		no
Chr5			15886702	15887369		AT5TE57370:transposable_element;AT5TE57375:transposable_element;		0.152636		hyper		no
Chr5			24370468	24370728		Intergenic		0.119319		hyper		no
Chr1			22845003	22845507		AT1TE75290:transposable_element;AT1TE75295:transposable_element;AT1TE75300:transposable_element;		0.169143		hyper		no
Chr5			19526635	19526843		Intergenic		0.209183		hyper		no
Chr3			7560104	7560300		AT3TE31770:transposable_element;		0.203309		hyper		no
Chr1			20272905	20273230		AT1TE66980:transposable_element;AT1TE66985:transposable_element;		0.116562		hyper		no
Chr2			7095875	7096121		AT2TE28860:transposable_element;		0.144829		hyper		no
Chr5			8082232	8082489		Intergenic		0.107888		hyper		no
Chr1			23966043	23966195		Intergenic		0.105902		hyper		no
Chr3			16754641	16755168		Intergenic		0.187295		hyper		no
Chr5			14879566	14879956		AT5TE53655:transposable_element;		0.207304		hyper		no
Chr5			18134369	18134723		Intergenic		0.142317		hyper		no
Chr3			11097298	11097546		AT3TE46170:transposable_element;		0.261466		hyper		no
Chr5			10363224	10363461		AT5G28415:transposable_element_gene;AT5TE37815:transposable_element;		0.111997		hyper		no
Chr5			3463452	3463653		Intergenic		0.12667		hyper		no
Chr3			15504818	15505221		AT3TE62800:transposable_element;		0.185561		hyper		no
Chr3			8661915	8662225		Intergenic		0.16204		hyper		no
Chr1			13872651	13873132		Intergenic		0.140624		hyper		no
Chr1			11782455	11782692		AT1TE38190:transposable_element;AT1TE38195:transposable_element;		0.181722		hyper		no
Chr2			12787008	12787325		Intergenic		0.16021		hyper		no
Chr5			6869389	6869747		Intergenic		0.14828		hyper		no
Chr4			7784479	7784936		AT4G13390:CDS;		0.12494		hyper		no
Chr1			10624344	10624852		AT1TE34365:transposable_element;		0.149219		hyper		no
Chr5			20757181	20757336		AT5G51060:three_prime_UTR;		0.145566		hyper		no
Chr3			8526498	8526779		AT3G23680:CDS;		0.100761		hyper		no
Chr5			8559545	8559817		AT5TE30965:transposable_element;AT5TE30970:transposable_element;		0.19604		hyper		no
Chr3			21552724	21553006		AT3TE87755:transposable_element;AT3TE87760:transposable_element;		0.187891		hyper		no
Chr3			16146637	16147049		AT3TE65385:transposable_element;		0.17262		hyper		no
Chr4			3537000	3537297		AT4TE15935:transposable_element;AT4TE15940:transposable_element;AT4TE15945:transposable_element;		0.113532		hyper		no
Chr3			9576521	9576968		AT3TE39980:transposable_element;		0.178705		hyper		no
Chr5			16981718	16981970		AT5TE61290:transposable_element;		0.133289		hyper		no
Chr3			20574238	20574324		Intergenic		0.152215		hyper		no
Chr4			10536388	10536643		AT4TE48170:transposable_element;		0.132402		hyper		no
Chr3			8328650	8329475		AT3TE34920:transposable_element;AT3TE34925:transposable_element;		0.149629		hyper		no
Chr1			16822420	16822875		AT1TE55645:transposable_element;AT1TE55650:transposable_element;		0.208683		hyper		no
Chr3			7710950	7711233		Intergenic		0.129213		hyper		no
Chr3			9120632	9120707		AT3TE38115:transposable_element;		0.199899		hyper		no
Chr1			16227025	16227553		AT1G43120:pseudogene;		0.100706		hyper		no
Chr3			10917591	10917855		AT3G28915:transposable_element_gene;AT3TE45385:transposable_element;		0.142066		hyper		no
Chr2			899366	899604		Intergenic		0.176528		hyper		no
Chr1			16651002	16651680		AT1TE54885:transposable_element;		0.119151		hyper		no
Chr3			7420274	7420427		AT3G21170:CDS;		0.109399		hyper		no
Chr4			9990088	9990627		AT4G18000:CDS;AT4TE45365:transposable_element;		0.120874		hyper		no
Chr5			22618223	22618468		AT5TE81385:transposable_element;		0.12657		hyper		no
Chr1			22450471	22450866		AT1TE74085:transposable_element;		0.10115		hyper		no
Chr5			7514561	7514860		AT5TE27170:transposable_element;		0.166471		hyper		no
Chr1			12466651	12466789		Intergenic		0.150791		hyper		no
Chr4			1365756	1366087		AT4TE06950:transposable_element;		0.123683		hyper		no
Chr1			19022882	19023329		Intergenic		0.124587		hyper		no
Chr4			13579847	13580063		Intergenic		0.104848		hyper		no
Chr5			9665031	9665380		AT5TE35050:transposable_element;		0.178428		hyper		no
Chr1			18626694	18627123		AT1TE61730:transposable_element;AT1TE61735:transposable_element;		0.117631		hyper		no
Chr5			911271	911393		Intergenic		0.132475		hyper		no
Chr1			17666035	17666340		AT1TE58650:transposable_element;AT1TE58655:transposable_element;		0.197945		hyper		no
Chr5			19998067	19998720		AT5TE72010:transposable_element;AT5TE72015:transposable_element;		0.116316		hyper		no
Chr4			474431	474728		AT4TE02470:transposable_element;		0.208783		hyper		no
Chr4			10268100	10268287		Intergenic		0.148521		hyper		no
Chr1			9759062	9759768		AT1G28002:pseudogene;		0.104478		hyper		no
Chr2			10354716	10355060		Intergenic		0.112679		hyper		no
Chr2			8039860	8040179		AT2G18530:CDS;		0.125346		hyper		no
Chr2			12377976	12378172		Intergenic		0.162631		hyper		no
Chr5			18309526	18309900		AT5TE65905:transposable_element;		0.12205		hyper		no
Chr5			17162325	17162562		AT5TE61990:transposable_element;		0.178019		hyper		no
Chr5			14687224	14687600		AT5TE52880:transposable_element;		0.164048		hyper		no
Chr2			10306159	10306583		AT2TE44115:transposable_element;AT2TE44120:transposable_element;		0.207637		hyper		no
Chr5			24346021	24346281		AT5G60560:CDS;		0.104926		hyper		no
Chr5			18113985	18114347		AT5TE65310:transposable_element;AT5TE65315:transposable_element;		0.161935		hyper		no
Chr2			7805605	7806099		AT2TE32265:transposable_element;		0.217532		hyper		no
Chr4			11113736	11113845		AT4G20725:transposable_element_gene;AT4TE50995:transposable_element;		0.111856		hyper		no
Chr3			9142497	9142936		Intergenic		0.138373		hyper		no
Chr2			8414157	8414415		AT2TE35060:transposable_element;AT2TE35065:transposable_element;		0.153163		hyper		no
Chr2			19566115	19566240		AT2G47760:CDS;		0.103942		hyper		no
Chr4			1434019	1434459		AT4TE07310:transposable_element;		0.151956		hyper		no
Chr4			17449816	17450003		AT4TE84225:transposable_element;		0.187992		hyper		no
Chr5			3051070	3051282		AT5TE11100:transposable_element;		0.111777		hyper		no
Chr2			11266919	11267109		AT2TE48710:transposable_element;		0.150497		hyper		no
Chr4			2330363	2330725		Intergenic		0.115301		hyper		no
Chr3			17531698	17531949		AT3TE71030:transposable_element;		0.135062		hyper		no
Chr2			6270208	6270506		AT2TE25540:transposable_element;		0.166372		hyper		no
Chr3			17272143	17272418		AT3TE70020:transposable_element;		0.131426		hyper		no
Chr1			13037045	13037244		AT1TE42550:transposable_element;		0.126318		hyper		no
Chr5			19451967	19452024		AT5TE70000:transposable_element;		0.136979		hyper		no
Chr3			14307994	14308141		AT3G42148:CDS;		0.155697		hyper		no
Chr3			6978170	6978459		AT3TE29300:transposable_element;		0.109702		hyper		no
Chr2			3297349	3297510		AT2G07682:transposable_element_gene;		0.15253		hyper		no
Chr5			6873310	6873687		Intergenic		0.139776		hyper		no
Chr2			11428650	11428853		AT2TE49500:transposable_element;		0.161392		hyper		no
Chr3			16325747	16325981		Intergenic		0.124602		hyper		no
Chr1			17315004	17315301		Intergenic		0.113696		hyper		no
Chr4			4823845	4824047		AT4TE20095:transposable_element;		0.123239		hyper		no
Chr3			4977147	4977289		AT3TE20960:transposable_element;AT3TE20965:transposable_element;		0.145695		hyper		no
Chr2			1018823	1019019		AT2TE04545:transposable_element;		0.254955		hyper		no
Chr1			10357104	10357427		AT1TE33490:transposable_element;		0.141906		hyper		no
Chr1			10775890	10776199		Intergenic		0.107851		hyper		no
Chr3			17011212	17011382		Intergenic		0.100127		hyper		no
Chr4			5450057	5450597		AT4G08560:CDS;AT4TE22825:transposable_element;AT4TE22830:transposable_element;AT4TE22835:transposable_element;		0.10533		hyper		no
Chr1			11150449	11150671		AT1G31210:transposable_element_gene;AT1TE36035:transposable_element;		0.125752		hyper		no
Chr2			14675816	14676224		AT2G34790:CDS;		0.140357		hyper		no
Chr1			1676647	1676803		AT1TE05485:transposable_element;		0.169241		hyper		no
Chr3			5164576	5164902		AT3TE21735:transposable_element;		0.101575		hyper		no
Chr2			808719	808953		AT2G02830:transposable_element_gene;AT2TE03565:transposable_element;		0.1137		hyper		no
Chr1			7138739	7138919		AT1TE23080:transposable_element;		0.143167		hyper		no
Chr4			6359766	6359867		AT4G10201:pseudogene;AT4G10210:CDS;AT4TE27090:transposable_element;		0.358459		hyper		no
Chr3			14989823	14990103		AT3G42922:transposable_element_gene;AT3TE61120:transposable_element;		0.124035		hyper		no
Chr5			15248662	15249022		Intergenic		0.130988		hyper		no
Chr1			12038330	12038881		AT1TE39005:transposable_element;		0.113276		hyper		no
Chr3			19648156	19648435		AT3TE79795:transposable_element;		0.158422		hyper		no
Chr2			11107398	11107680		Intergenic		0.155886		hyper		no
Chr5			9284065	9284318		Intergenic		0.245482		hyper		no
Chr2			10037622	10038255		AT2TE42940:transposable_element;		0.181008		hyper		no
Chr4			17197	17548		AT4TE00085:transposable_element;AT4TE00090:transposable_element;		0.11542		hyper		no
Chr4			18182093	18182559		AT4G39020:CDS;		0.117491		hyper		no
Chr2			4486085	4486252		AT2TE18815:transposable_element;		0.109655		hyper		no
Chr3			11970330	11970528		AT3TE49850:transposable_element;		0.196461		hyper		no
Chr2			1280499	1281139		AT2TE05795:transposable_element;AT2TE05800:transposable_element;		0.142383		hyper		no
Chr1			6014028	6014351		AT1TE19430:transposable_element;AT1TE19435:transposable_element;		0.12076		hyper		no
Chr1			10506448	10506755		AT1TE33950:transposable_element;AT1TE33955:transposable_element;		0.104162		hyper		no
Chr1			18907922	18908157		Intergenic		0.124527		hyper		no
Chr2			543637	544207		AT2TE02335:transposable_element;		0.10378		hyper		no
[truncated: 948 more rows]

## Sheet: CHH
Chromosome	5% start	5% end	10% start	10% end	5% annotation	10% annotation	5% meanDiff	10% meanDiff	5% direction	10% direction	edmr Overlap 5%	edmr Overlap 10%	Proposed baseline methylation state in A. thaliana?
Chr5	18563597	18564241	18563706	18564121	AT5G45770:CDS;	AT5G45770:CDS;	0.198714	0.157229	hyper	hyper	no	no	UM	(UM = unmethylated), based on comparison to Table S4 in Niederhuth et. al. 2016. Genome biology.
ChrM	218143	219004	217561	219015	no match	no match	0.160717	0.348648	hyper	hyper	no	no	n/a	The multigenic DMRs are listed as being previously characteriazed as methylated here if at least one of the genes in the DMR was previously characterized as methylated
ChrM	87489	88050	87736	88050	no match	no match	0.259031	0.137186	hyper	hyper	no	no	n/a
ChrM	302708	303920	302731	303568	no match	no match	0.42617	0.254532	hyper	hyper	no	no	n/a
Chr2	13716931	13717539	13716878	13717582	AT2G32291:pseudogene;	AT2G32290:five_prime_UTR,CDS;AT2G32291:pseudogene;	0.150067	0.208796	hyper	hyper	no	yes	n/a
ChrM	221206	221698	221566	221916	no match	no match	0.268836	0.224964	hyper	hyper	no	no	n/a
ChrM	278248	278974	278319	279512	no match	no match	0.246608	0.236615	hyper	hyper	no	no	n/a
Chr3	15911967	15912504	15911955	15912450	AT3TE64390:transposable_element;	AT3TE64390:transposable_element;	0.141605	0.131283	hyper	hyper	no	no	n/a
Chr3	8654152	8654633	8654170	8654723	AT3G23950:CDS;	AT3TE36280:transposable_element;	0.113842	0.134291	hyper	hyper	no	no	UM
Chr3	557462	557769	557464	557781	AT3G02610:three_prime_UTR;	AT3G02610:three_prime_UTR;	0.145132	0.138384	hyper	hyper	no	no	UM
Chr1	15335521	15336210	15335865	15336146	AT1TE50540:transposable_element;AT1TE50545:transposable_element;	AT1TE50540:transposable_element;AT1TE50545:transposable_element;	0.223168	0.145003	hyper	hyper	no	no	n/a
ChrM	292446	292962	292483	293011	no match	no match	0.106886	0.176811	hyper	hyper	no	no	n/a
Chr3	20629274	20629704	20629441	20629674	AT3TE83890:transposable_element;	AT3TE83890:transposable_element;	0.265646	0.241712	hyper	hyper	no	no	n/a
Chr4	8740915	8741518	8740965	8741497	AT4TE39035:transposable_element;	AT4TE39035:transposable_element;	0.193908	0.279624	hyper	hyper	no	no	n/a
Chr2	1259996	1260436	1260034	1260388	AT2G03980:mRNA;AT2TE05720:transposable_element;AT2TE05725:transposable_element;	AT2G03980:mRNA;AT2TE05720:transposable_element;	0.207723	0.203133	hyper	hyper	no	no	UM
ChrM	295532	295965	295382	295965	no match	no match	0.291285	0.389262	hyper	hyper	no	no	n/a
Chr5	14346156	14346647	14346156	14346647	AT5G36410:CDS;	AT5G36410:CDS;	0.381078	0.495145	hyper	hyper	no	no	UM
Chr4	4195008	4195384	4194969	4195062	AT4TE18080:transposable_element;	AT4TE18080:transposable_element;	0.286828	0.190712	hyper	hyper	no	no	n/a
Chr2	987311	987648	987311	987508	Intergenic	Intergenic	0.187702	0.124949	hyper	hyper	no	no	n/a
Chr5	14343961	14344452	14343961	14344452	AT5G36400:CDS;	AT5G36400:CDS;	0.252125	0.497591	hyper	hyper	no	no	UM
Chr1	24725128	24725384	24725097	24725440	AT1TE81220:transposable_element;	AT1TE81220:transposable_element;	0.103653	0.119269	hyper	hyper	no	no	n/a
[truncated: 420 more rows]
