# Supplementary material for: Herbicide injury induces DNA methylome alterations in Arabidopsis
Source: PeerJ. 2017 Jul 20;5:e3560. doi: 10.7717/peerj.3560 (PMC5522609; doi:10.7717/peerj.3560)
Supplement: Supplemental Information 13 — GO term enrichment in DMR-associated genes. [file peerj-05-3560-s013.xlsx]

## Sheet: All context -Biological Process
Biological Process (VirtualPlant 1.3)
	Term	Observed(Count)	% of total	p-value	Normed Frequency (Fold Change)	LOG10
5% hyper	endocytosis	5	0.01	0.03	14.3256	1.15611
(cutoff p<0.05)	membrane invagination	5	0.01	0.03	14.3256	1.15611
10% hyper	protein modification process	100	0.084	0.00425	1.59335	0.202312
(cutoff p<0.05)	phosphorus metabolic process	80	0.068	0.00425	1.68177	0.225766
	phosphate metabolic process	80	0.068	0.00425	1.68345	0.2262
	macromolecule modification	109	0.092	0.00425	1.54508	0.188951
	phosphorylation	73	0.062	0.01	1.66596	0.221665
	protein phosphorylation	71	0.06	0.02	1.6489	0.217195
10% hypo	primary metabolic process	355	0.278	0.00108	1.26983	0.103745
(cutoff p<0.05)	cellular process	504	0.394	0.03	1.16019	0.0645286
10% hyper	protein modification process	100	0.084	0.00425	1.59335	0.202312
(cutoff p<0.01)	phosphorus metabolic process	80	0.068	0.00425	1.68177	0.225766
	phosphate metabolic process	80	0.068	0.00425	1.68345	0.2262
	macromolecule modification	109	0.092	0.00425	1.54508	0.188951
10% hypo	primary metabolic process	355	0.278	0.00108	1.26983	0.103745
(cutoff p<0.01)

## Sheet: Molecular Function
Molecular Function (VirtualPlant 1.3)
	Term	Observed(Count)	% of Total	p-value	Normed Frequency (Fold Change)	LOG10
10% hyper	catalytic activity	483	0.398	2.39e-05	1.22397	0.0877698
(cutoff p<0.01)	ribonucleotide binding	130	0.107	2.39e-05	1.63148	0.212583
	purine ribonucleotide binding	130	0.107	2.39e-05	1.63148	0.212583
	purine ribonucleoside triphosphate binding	129	0.106	2.39e-05	1.62481	0.210802
	purine nucleotide binding	133	0.11	6.19e-05	1.5743	0.197086
	hydrolase activity	199	0.164	0.000102	1.41107	0.149549
	pyrophosphatase activity	68	0.056	0.000211	1.87137	0.27216
	hydrolase activity, acting on acid anhydrides, in phosphorus-containing anhydrides	68	0.056	0.000211	1.86399	0.270443
	adenyl ribonucleotide binding	110	0.091	0.000211	1.59472	0.202683
	hydrolase activity, acting on acid anhydrides	68	0.056	0.000219	1.84939	0.267027
	ATP binding	109	0.09	0.000237	1.58684	0.200534
	nucleoside-triphosphatase activity	65	0.054	0.000242	1.86263	0.270126
	nucleotide binding	153	0.126	0.000513	1.4255	0.153967
	nucleoside binding	113	0.093	0.000513	1.52963	0.184587
	purine nucleoside binding	113	0.093	0.000513	1.53362	0.185717
	adenyl nucleotide binding	113	0.093	0.000513	1.53562	0.186284
	kinase activity	99	0.082	0.00149	1.53456	0.185983
	phosphotransferase activity, alcohol group as acceptor	80	0.066	0.00195	1.60716	0.206059
	protein kinase activity	70	0.058	0.0026	1.64965	0.217393
10% hypo	catalytic activity	528	0.4	1.23e-05	1.23056	0.0901013
(cutoff p<0.01)	nucleotide binding	171	0.13	0.000185	1.46527	0.165916
	nucleoside binding	128	0.097	0.000185	1.59354	0.202363
	purine nucleoside binding	126	0.095	0.000185	1.57273	0.196654
	adenyl nucleotide binding	126	0.095	0.000185	1.57478	0.19722
	purine nucleotide binding	140	0.106	0.000188	1.52408	0.183007
	ribonucleotide binding	131	0.099	0.000408	1.51201	0.179555
	purine ribonucleotide binding	131	0.099	0.000408	1.51201	0.179555
	adenyl ribonucleotide binding	117	0.089	0.000408	1.55999	0.193121
	ATP binding	116	0.088	0.000434	1.55314	0.19121
	purine ribonucleoside triphosphate binding	130	0.098	0.000438	1.50591	0.1778
	hydrolase activity	208	0.158	0.0005	1.35645	0.132404
	voltage-gated anion channel activity	7	0.005	0.00484	8.38243	0.92337
	pyrophosphatase activity	66	0.05	0.00484	1.67048	0.22284
	nucleoside-triphosphatase activity	64	0.048	0.00484	1.6867	0.227038
	hydrolase activity, acting on acid anhydrides, in phosphorus-containing anhydrides	66	0.05	0.00504	1.66388	0.221122
	anion channel activity	7	0.005	0.00552	7.88935	0.897041
	hydrolase activity, acting on acid anhydrides	66	0.05	0.00552	1.65085	0.217707
	oxidoreductase activity, acting on the aldehyde or oxo group of donors	13	0.01	0.00807	3.60983	0.557486
5% hyper	catalytic activity	201	0.412	0.02	1.26712	0.102818
(cutoff p<0.05)	ribonucleotide binding	53	0.109	0.03	1.65468	0.218714
	purine ribonucleotide binding	53	0.109	0.03	1.65468	0.218714
	purine ribonucleoside triphosphate binding	53	0.109	0.03	1.66068	0.220287
10% hyper	catalytic activity	483	0.398	2.39e-05	1.22397	0.0877698
(cutoff p<0.05)	ribonucleotide binding	130	0.107	2.39e-05	1.63148	0.212583
	purine ribonucleotide binding	130	0.107	2.39e-05	1.63148	0.212583
	purine ribonucleoside triphosphate binding	129	0.106	2.39e-05	1.62481	0.210802
	purine nucleotide binding	133	0.11	6.19e-05	1.5743	0.197086
	hydrolase activity	199	0.164	0.000102	1.41107	0.149549
	pyrophosphatase activity	68	0.056	0.000211	1.87137	0.27216
	hydrolase activity, acting on acid anhydrides, in phosphorus-containing anhydrides	68	0.056	0.000211	1.86399	0.270443
	adenyl ribonucleotide binding	110	0.091	0.000211	1.59472	0.202683
	hydrolase activity, acting on acid anhydrides	68	0.056	0.000219	1.84939	0.267027
	ATP binding	109	0.09	0.000237	1.58684	0.200534
	nucleoside-triphosphatase activity	65	0.054	0.000242	1.86263	0.270126
	nucleotide binding	153	0.126	0.000513	1.4255	0.153967
	nucleoside binding	113	0.093	0.000513	1.52963	0.184587
	purine nucleoside binding	113	0.093	0.000513	1.53362	0.185717
	adenyl nucleotide binding	113	0.093	0.000513	1.53562	0.186284
	kinase activity	99	0.082	0.00149	1.53456	0.185983
	phosphotransferase activity, alcohol group as acceptor	80	0.066	0.00195	1.60716	0.206059
	protein kinase activity	70	0.058	0.0026	1.64965	0.217393
	transferase activity, transferring phosphorus-containing groups	105	0.086	0.01	1.41582	0.151008
	structural constituent of cell wall	8	0.007	0.01	5.05037	0.703323
	protein serine/threonine kinase activity	53	0.044	0.02	1.64797	0.216948
	ATPase activity	37	0.03	0.03	1.79677	0.254492
	transferase activity	167	0.138	0.05	1.25689	0.0992977
10% hypo	catalytic activity	528	0.4	1.23e-05	1.23056	0.0901013
(cutoff p<0.05)	nucleotide binding	171	0.13	0.000185	1.46527	0.165916
	nucleoside binding	128	0.097	0.000185	1.59354	0.202363
	purine nucleoside binding	126	0.095	0.000185	1.57273	0.196654
	adenyl nucleotide binding	126	0.095	0.000185	1.57478	0.19722
	purine nucleotide binding	140	0.106	0.000188	1.52408	0.183007
	ribonucleotide binding	131	0.099	0.000408	1.51201	0.179555
	purine ribonucleotide binding	131	0.099	0.000408	1.51201	0.179555
	adenyl ribonucleotide binding	117	0.089	0.000408	1.55999	0.193121
	ATP binding	116	0.088	0.000434	1.55314	0.19121
	purine ribonucleoside triphosphate binding	130	0.098	0.000438	1.50591	0.1778
	hydrolase activity	208	0.158	0.0005	1.35645	0.132404
	voltage-gated anion channel activity	7	0.005	0.00484	8.38243	0.92337
	pyrophosphatase activity	66	0.05	0.00484	1.67048	0.22284
	nucleoside-triphosphatase activity	64	0.048	0.00484	1.6867	0.227038
	hydrolase activity, acting on acid anhydrides, in phosphorus-containing anhydrides	66	0.05	0.00504	1.66388	0.221122
	anion channel activity	7	0.005	0.00552	7.88935	0.897041
	hydrolase activity, acting on acid anhydrides	66	0.05	0.00552	1.65085	0.217707
	oxidoreductase activity, acting on the aldehyde or oxo group of donors	13	0.01	0.00807	3.60983	0.557486
	pyruvate dehydrogenase activity	4	0.003	0.04	12.7732	1.1063
	pyruvate dehydrogenase (acetyl-transferring) activity	4	0.003	0.04	12.7732	1.1063
	motor activity	13	0.01	0.04	2.89626	0.461837
	transporter activity	92	0.07	0.04	1.4012	0.146499
	microtubule motor activity	11	0.008	0.05	3.19331	0.504241
	binding	539	0.408	0.05	1.112	0.0461054
	oxidoreductase activity, acting on the aldehyde or oxo group of donors, disulfide as acceptor	5	0.004	0.05	7.36917	0.867419

## Sheet: CHG-Only
	Term	Observed Frequency	Rfi	Expected Frequency	Rfr	p-value	Genes	log 10 Rfi/Rfr
GO:0005199	structural constituent of cell wall	9 out of 407 genes	0.022	33 out of 25291 genes	0.001	4.82e-06	AT4G13390|AT1G23720|AT3G54580|AT3G54590|AT2G27380|AT3G28550|AT2G24980|AT5G06630|AT1G26240	1.34242
GO:0004553	hydrolase activity, hydrolyzing O-glycosyl compounds	20 out of 407 genes	0.049	412 out of 25291 genes	0.016	0.00324	AT3G60140|AT2G44570|AT1G17150|AT4G19720|AT2G44460|AT3G45940|AT3G21960|AT2G26620|AT5G49250|AT5G49900|AT1G47770|AT3G10890|AT3G24542|AT5G63800|AT4G08160|AT4G10060|AT1G18310|AT4G09740|AT1G55120|AT3G53065	0.486076
GO:0016798	hydrolase activity, acting on glycosyl bonds	20 out of 407 genes	0.049	443 out of 25291 genes	0.018	0.00569	AT3G60140|AT2G44570|AT1G17150|AT4G19720|AT2G44460|AT3G45940|AT3G21960|AT2G26620|AT5G49250|AT5G49900|AT1G47770|AT3G10890|AT3G24542|AT5G63800|AT4G08160|AT4G10060|AT1G18310|AT4G09740|AT1G55120|AT3G53065	0.434924
		Rfi/Rfr represents the ratio of the relative frequency of GO terms in the input (glyphosate DMRs) to the reference (TAIR10 Arabidopsis genome) datasets.

## Sheet: CG-Only
	Term	Observed Frequency	Rfi	Expected Frequency	Rfr	p-value	Genes	log 10 Rfi/Rfr		Term	log 10 Rfi/Rfr
GO:0003824	catalytic activity	1127 out of 2771 genes	0.407	8221 out of 25291 genes	0.325	8.63e-15	AT1G12840|AT1G07080|AT4G25090|AT5G46260|AT4G19720|AT5G16440|AT1G51810|AT1G10670|AT3G46920|AT1G20650|AT5G24950|AT3G44560|AT4G34640|AT4G13550|AT5G57670|AT3G05545|AT1G22670|AT5G15170|AT3G10450|AT5G55120|AT1G69770|AT2G18950|AT4G27800|AT4G32830|AT4G23590|AT2G39110|AT5G16715|AT4G25310|AT3G28670|AT4G18550|AT1G26940|AT3G48540|AT1G54560|AT1G52500|AT2G31865|AT1G64110|AT1G32950|AT3G14360|AT1G27940|AT4G16570…	0.097711		catalytic activity	0.097711
GO:0000166	nucleotide binding	371 out of 2771 genes	0.134	2236 out of 25291 genes	0.088	1.58e-11	AT4G19520|AT1G27170|AT5G63610|AT1G20560|AT1G31540|AT4G11010|AT4G25090|AT5G05400|AT1G72340|AT5G46260|AT3G25510|AT1G74260|AT3G02850|AT1G51810|AT3G24660|AT1G54610|AT1G20650|AT1G26380|AT1G66260|AT2G31060|AT3G28520|AT4G12790|AT5G57670|AT2G21380|AT5G48770|AT3G07960|AT1G19230|AT3G15290|AT3G03300|AT2G39110|AT3G09830|AT1G51805|AT1G58602|AT5G66630|AT5G16715|AT1G14390|AT5G61140|AT3G09720|AT3G50230|AT2G37510…	0.182622		nucleotide binding	0.182622
GO:0032553	ribonucleotide binding	294 out of 2771 genes	0.106	1660 out of 25291 genes	0.066	1.58e-11	AT4G19520|AT1G27170|AT5G63610|AT3G26560|AT1G20560|AT1G31540|AT3G12200|AT4G11010|AT3G05740|AT4G16130|AT2G45770|AT5G40060|AT5G05400|AT1G72340|AT5G46260|AT1G18370|AT3G25510|AT1G74260|AT4G16990|AT1G51810|AT3G24660|AT1G54610|AT1G71010|AT1G20650|AT1G10620|AT3G24190|AT2G31060|AT3G48770|AT3G51290|AT3G16060|AT3G28520|AT4G12790|AT5G57670|AT4G24810|AT2G21380|AT3G56050|AT5G48770|AT5G10630|AT3G07960|AT4G13850…	0.205762		ribonucleotide binding	0.205762
GO:0032555	purine ribonucleotide binding	294 out of 2771 genes	0.106	1660 out of 25291 genes	0.066	1.58e-11	AT4G19520|AT1G27170|AT5G63610|AT3G26560|AT1G20560|AT1G31540|AT3G12200|AT4G11010|AT3G05740|AT4G16130|AT2G45770|AT5G40060|AT5G05400|AT1G72340|AT5G46260|AT1G18370|AT3G25510|AT1G74260|AT4G16990|AT1G51810|AT3G24660|AT1G54610|AT1G71010|AT1G20650|AT1G10620|AT3G24190|AT2G31060|AT3G48770|AT3G51290|AT3G16060|AT3G28520|AT4G12790|AT5G57670|AT4G24810|AT2G21380|AT3G56050|AT5G48770|AT5G10630|AT3G07960|AT4G13850…	0.205762		purine ribonucleotide binding	0.205762
GO:0035639	purine ribonucleoside triphosphate binding	292 out of 2771 genes	0.105	1654 out of 25291 genes	0.065	1.72e-11	AT4G19520|AT1G27170|AT5G63610|AT3G26560|AT1G31540|AT3G12200|AT4G11010|AT3G05740|AT4G16130|AT2G45770|AT5G40060|AT5G05400|AT1G72340|AT5G46260|AT1G18370|AT3G25510|AT1G74260|AT4G16990|AT1G51810|AT3G24660|AT1G54610|AT1G71010|AT1G20650|AT1G10620|AT3G24190|AT2G31060|AT3G48770|AT3G51290|AT3G16060|AT3G28520|AT4G12790|AT5G57670|AT4G24810|AT2G21380|AT3G56050|AT5G48770|AT5G10630|AT3G07960|AT4G13850|AT1G33970…	0.208276		purine ribonucleoside triphosphate binding	0.208276
GO:0017076	purine nucleotide binding	306 out of 2771 genes	0.11	1760 out of 25291 genes	0.07	1.78e-11	AT4G19520|AT1G27170|AT5G63610|AT3G26560|AT1G20560|AT1G31540|AT3G12200|AT4G11010|AT4G25090|AT3G05740|AT4G16130|AT2G45770|AT5G40060|AT5G05400|AT1G72340|AT5G46260|AT1G18370|AT3G25510|AT1G74260|AT4G16990|AT1G51810|AT3G24660|AT1G54610|AT1G71010|AT1G20650|AT1G26380|AT1G10620|AT3G24190|AT2G31060|AT3G48770|AT3G51290|AT3G16060|AT3G28520|AT4G12790|AT5G57670|AT4G24810|AT2G21380|AT3G56050|AT5G48770|AT5G10630…	0.196295		purine nucleotide binding	0.196295
GO:0001882	nucleoside binding	268 out of 2771 genes	0.097	1539 out of 25291 genes	0.061	4.74e-10	AT4G19520|AT1G27170|AT5G63610|AT3G26560|AT1G20560|AT1G31540|AT3G12200|AT4G11010|AT4G25090|AT3G05740|AT4G16130|AT5G40060|AT5G05400|AT5G46260|AT1G18370|AT3G25510|AT1G74260|AT4G16990|AT1G51810|AT3G24660|AT1G54610|AT1G71010|AT1G20650|AT1G26380|AT1G10620|AT3G24190|AT3G48770|AT3G16060|AT3G28520|AT4G12790|AT5G57670|AT4G24810|AT2G21380|AT3G56050|AT5G48770|AT3G07960|AT1G19230|AT4G13850|AT1G29940|AT3G03300…	0.201442		nucleoside binding	0.201442
GO:0032559	adenyl ribonucleotide binding	254 out of 2771 genes	0.092	1437 out of 25291 genes	0.057	4.74e-10	AT4G19520|AT1G27170|AT5G63610|AT3G26560|AT1G20560|AT1G31540|AT3G12200|AT4G11010|AT3G05740|AT4G16130|AT5G40060|AT5G05400|AT5G46260|AT1G18370|AT3G25510|AT1G74260|AT4G16990|AT1G51810|AT3G24660|AT1G54610|AT1G71010|AT1G20650|AT1G10620|AT3G24190|AT3G48770|AT3G16060|AT3G28520|AT4G12790|AT5G57670|AT4G24810|AT2G21380|AT3G56050|AT5G48770|AT3G07960|AT4G13850|AT3G03300|AT2G39110|AT3G09830|AT1G51805|AT1G58602…	0.207913		adenyl ribonucleotide binding	0.207913
GO:0005524	ATP binding	252 out of 2771 genes	0.091	1431 out of 25291 genes	0.057	6.51e-10	AT4G19520|AT1G27170|AT5G63610|AT3G26560|AT1G31540|AT3G12200|AT4G11010|AT3G05740|AT4G16130|AT5G40060|AT5G05400|AT5G46260|AT1G18370|AT3G25510|AT1G74260|AT4G16990|AT1G51810|AT3G24660|AT1G54610|AT1G71010|AT1G20650|AT1G10620|AT3G24190|AT3G48770|AT3G16060|AT3G28520|AT4G12790|AT5G57670|AT4G24810|AT2G21380|AT3G56050|AT5G48770|AT3G07960|AT4G13850|AT3G03300|AT2G39110|AT3G09830|AT1G51805|AT1G58602|AT5G66630…	0.203167		ATP binding	0.203167
GO:0030554	adenyl nucleotide binding	266 out of 2771 genes	0.096	1533 out of 25291 genes	0.061	6.51e-10	AT4G19520|AT1G27170|AT5G63610|AT3G26560|AT1G20560|AT1G31540|AT3G12200|AT4G11010|AT4G25090|AT3G05740|AT4G16130|AT5G40060|AT5G05400|AT5G46260|AT1G18370|AT3G25510|AT1G74260|AT4G16990|AT1G51810|AT3G24660|AT1G54610|AT1G71010|AT1G20650|AT1G26380|AT1G10620|AT3G24190|AT3G48770|AT3G16060|AT3G28520|AT4G12790|AT5G57670|AT4G24810|AT2G21380|AT3G56050|AT5G48770|AT3G07960|AT1G19230|AT4G13850|AT3G03300|AT2G39110…	0.196941		adenyl nucleotide binding	0.196941
GO:0001883	purine nucleoside binding	266 out of 2771 genes	0.096	1535 out of 25291 genes	0.061	6.54e-10	AT4G19520|AT1G27170|AT5G63610|AT3G26560|AT1G20560|AT1G31540|AT3G12200|AT4G11010|AT4G25090|AT3G05740|AT4G16130|AT5G40060|AT5G05400|AT5G46260|AT1G18370|AT3G25510|AT1G74260|AT4G16990|AT1G51810|AT3G24660|AT1G54610|AT1G71010|AT1G20650|AT1G26380|AT1G10620|AT3G24190|AT3G48770|AT3G16060|AT3G28520|AT4G12790|AT5G57670|AT4G24810|AT2G21380|AT3G56050|AT5G48770|AT3G07960|AT1G19230|AT4G13850|AT3G03300|AT2G39110…	0.196941		purine nucleoside binding	0.196941
GO:0016462	pyrophosphatase activity	152 out of 2771 genes	0.055	757 out of 25291 genes	0.03	4.82e-09	AT4G12720|AT3G26560|AT1G31540|AT3G47780|AT1G12840|AT5G44800|AT3G13080|AT2G37280|AT4G11730|AT3G05740|AT1G27770|AT3G22980|AT2G45770|AT5G40060|AT1G17840|AT5G46260|AT1G68710|AT1G18370|AT1G53390|AT3G25510|AT4G30490|AT3G63480|AT4G13350|AT2G42070|AT3G28345|AT3G10670|AT1G33360|AT5G06670|AT1G76720|AT5G55080|AT3G53510|AT2G31060|AT3G16060|AT3G47740|AT3G28520|AT2G21380|AT4G39850|AT4G27180|AT1G17580|AT5G58120…	0.263241		pyrophosphatase activity	0.263241
GO:0016817	hydrolase activity, acting on acid anhydrides	153 out of 2771 genes	0.055	766 out of 25291 genes	0.03	5.29e-09	AT4G12720|AT3G26560|AT1G31540|AT3G47780|AT1G12840|AT5G44800|AT3G13080|AT2G37280|AT4G11730|AT3G05740|AT1G27770|AT3G22980|AT2G45770|AT5G40060|AT1G17840|AT5G46260|AT1G68710|AT1G18370|AT1G53390|AT3G25510|AT4G30490|AT3G63480|AT4G13350|AT2G42070|AT3G28345|AT3G10670|AT1G33360|AT5G06670|AT1G76720|AT5G55080|AT3G53510|AT2G31060|AT3G16060|AT3G47740|AT3G28520|AT3G56490|AT2G21380|AT4G39850|AT4G27180|AT1G17580…	0.263241		hydrolase activity, acting on acid anhydrides	0.263241
GO:0016818	hydrolase activity, acting on acid anhydrides, in phosphorus-containing anhydrides	152 out of 2771 genes	0.055	760 out of 25291 genes	0.03	5.29e-09	AT4G12720|AT3G26560|AT1G31540|AT3G47780|AT1G12840|AT5G44800|AT3G13080|AT2G37280|AT4G11730|AT3G05740|AT1G27770|AT3G22980|AT2G45770|AT5G40060|AT1G17840|AT5G46260|AT1G68710|AT1G18370|AT1G53390|AT3G25510|AT4G30490|AT3G63480|AT4G13350|AT2G42070|AT3G28345|AT3G10670|AT1G33360|AT5G06670|AT1G76720|AT5G55080|AT3G53510|AT2G31060|AT3G16060|AT3G47740|AT3G28520|AT2G21380|AT4G39850|AT4G27180|AT1G17580|AT5G58120…	0.263241		hydrolase activity, acting on acid anhydrides, in phosphorus-containing anhydrides	0.263241
GO:0017111	nucleoside-triphosphatase activity	146 out of 2771 genes	0.053	727 out of 25291 genes	0.029	9.23e-09	AT3G26560|AT1G31540|AT3G47780|AT1G12840|AT5G44800|AT3G13080|AT2G37280|AT4G11730|AT3G05740|AT1G27770|AT3G22980|AT2G45770|AT5G40060|AT1G17840|AT5G46260|AT1G68710|AT1G18370|AT1G53390|AT3G25510|AT4G30490|AT3G63480|AT4G13350|AT3G28345|AT3G10670|AT1G33360|AT5G06670|AT1G76720|AT5G55080|AT3G53510|AT2G31060|AT3G16060|AT3G47740|AT3G28520|AT2G21380|AT4G39850|AT4G27180|AT1G17580|AT5G58120|AT1G18550|AT1G53140…	0.261878		nucleoside-triphosphatase activity	0.261878
GO:0016787	hydrolase activity	437 out of 2771 genes	0.158	2938 out of 25291 genes	0.116	2.82e-08	AT1G31540|AT1G03590|AT5G58050|AT1G12840|AT3G08980|AT3G13080|AT5G46260|AT4G19720|AT3G25510|AT4G21630|AT4G17480|AT3G53510|AT2G31060|AT3G28520|AT4G13550|AT3G56490|AT2G21380|AT5G39910|AT4G33830|AT1G22670|AT5G15170|AT4G27180|AT1G17580|AT3G10450|AT5G44070|AT3G51830|AT4G01610|AT4G27800|AT3G03300|AT4G21590|AT2G24640|AT1G76140|AT5G39830|AT3G05910|AT4G33500|AT1G06670|AT2G46860|AT5G61140|AT4G33540|AT4G18550…	0.134199		hydrolase activity	0.134199
GO:0016301	kinase activity	220 out of 2771 genes	0.079	1344 out of 25291 genes	0.053	2.06e-06	AT1G04700|AT5G63400|AT5G63610|AT5G58050|AT3G12200|AT4G11010|AT5G01850|AT3G45430|AT1G11050|AT4G16130|AT2G20900|AT1G51810|AT3G24660|AT1G54610|AT3G46920|AT1G71010|AT1G20650|AT1G10620|AT3G24190|AT4G29220|AT5G57670|AT4G24810|AT3G56050|AT4G30340|AT3G59700|AT5G07280|AT2G04300|AT2G41140|AT1G71697|AT4G36080|AT1G08720|AT3G07960|AT1G35670|AT4G32830|AT5G07180|AT2G39110|AT3G09830|AT1G51805|AT3G55610|AT4G23320…	0.173351		kinase activity	0.173351
GO:0016772	transferase activity, transferring phosphorus-containing groups	245 out of 2771 genes	0.088	1545 out of 25291 genes	0.061	3.34e-06	AT1G04700|AT5G63400|AT3G14050|AT5G63610|AT5G58050|AT3G12200|AT4G11010|AT5G01850|AT3G45430|AT1G11050|AT4G16130|AT2G20900|AT3G57660|AT1G51810|AT3G24660|AT1G54610|AT3G46920|AT1G71010|AT1G20650|AT1G10620|AT3G24190|AT3G25585|AT4G29220|AT5G57670|AT4G24810|AT3G56050|AT4G30340|AT3G59700|AT1G13560|AT5G07280|AT2G04300|AT5G55120|AT2G41140|AT1G71697|AT4G36080|AT1G08720|AT3G07960|AT1G29940|AT1G35670|AT5G55810…	0.159153		transferase activity, transferring phosphorus-containing groups	0.159153
GO:0016740	transferase activity	397 out of 2771 genes	0.143	2768 out of 25291 genes	0.109	7.15e-06	AT1G04700|AT5G63400|AT3G14050|AT5G63610|AT5G58050|AT4G11010|AT1G51810|AT1G10670|AT3G24660|AT1G54610|AT3G46920|AT1G20650|AT1G06490|AT1G17000|AT5G03860|AT4G34640|AT5G57670|AT1G50580|AT3G48730|AT5G55120|AT1G69770|AT2G18950|AT5G44070|AT1G08720|AT5G67230|AT3G07960|AT3G48790|AT1G29940|AT3G13930|AT1G35670|AT5G55810|AT4G32830|AT1G78510|AT4G23590|AT5G07180|AT2G39110|AT3G09830|AT5G42760|AT1G51805|AT4G23320…	0.11791		transferase activity	0.11791
GO:0016773	phosphotransferase activity, alcohol group as acceptor	175 out of 2771 genes	0.063	1037 out of 25291 genes	0.041	8.37e-06	AT1G04700|AT5G63610|AT3G12200|AT5G01850|AT4G16130|AT2G20900|AT1G51810|AT3G24660|AT1G54610|AT3G46920|AT1G71010|AT1G20650|AT1G10620|AT3G24190|AT4G29220|AT5G57670|AT4G24810|AT3G56050|AT4G30340|AT5G07280|AT2G41140|AT1G71697|AT4G36080|AT1G08720|AT3G07960|AT1G35670|AT4G32830|AT2G39110|AT3G09830|AT1G51805|AT1G14390|AT1G23700|AT5G61580|AT3G01640|AT4G39540|AT3G50230|AT1G61480|AT4G32300|AT5G49780|AT1G07880…	0.186557		phosphotransferase activity, alcohol group as acceptor	0.186557
GO:0004672	protein kinase activity	153 out of 2771 genes	0.055	884 out of 25291 genes	0.035	1.32e-05	AT1G04700|AT2G47060|AT5G63610|AT3G12200|AT5G01850|AT2G20050|AT5G49770|AT2G16750|AT5G39440|AT3G58640|AT4G24100|AT3G57730|AT4G35310|AT1G16330|AT5G35980|AT1G51810|AT5G57035|AT3G18040|AT3G24660|AT5G13290|AT1G54610|AT3G46920|AT5G07070|AT3G14840|AT1G20650|AT5G58300|AT1G10620|AT3G24190|AT5G57670|AT5G53450|AT4G24810|AT3G56050|AT3G44850|AT1G17750|AT1G68400|AT5G07280|AT1G74740|AT1G72300|AT2G41140|AT1G08720…	0.196295		protein kinase activity	0.196295
GO:0004674	protein serine/threonine kinase activity	121 out of 2771 genes	0.044	670 out of 25291 genes	0.026	3.6e-05	AT2G47060|AT5G63610|AT3G12200|AT2G20050|AT5G49770|AT2G16750|AT5G39440|AT3G58640|AT4G24100|AT4G35310|AT1G16330|AT5G35980|AT1G51810|AT5G57035|AT3G18040|AT3G24660|AT1G54610|AT5G07070|AT3G14840|AT1G20650|AT5G58300|AT1G10620|AT5G57670|AT3G44850|AT1G17750|AT1G68400|AT1G74740|AT1G72300|AT2G41140|AT1G08720|AT5G24080|AT2G23080|AT3G07070|AT5G10520|AT1G35670|AT4G32830|AT1G11300|AT3G01300|AT1G51805|AT1G14390…	0.228479		protein serine/threonine kinase activity	0.228479
GO:0005488	binding	1126 out of 2771 genes	0.406	9287 out of 25291 genes	0.367	0.0014	AT3G51870|AT1G20560|AT4G25090|AT5G46260|AT4G19720|AT5G44375|AT5G61960|AT1G51810|AT1G20650|AT1G57800|AT3G61050|AT5G24950|AT5G48120|AT1G04850|AT5G57670|AT4G28600|AT4G39820|AT3G05545|AT1G22670|AT1G17790|AT5G56950|AT4G23590|AT2G39110|AT5G48360|AT2G40950|AT5G16715|AT5G52170|AT3G62890|AT3G28670|AT3G48540|AT4G19990|AT1G64110|AT2G16710|AT2G14210|AT1G32950|AT1G69420|AT2G39850|AT5G15680|AT1G74240|AT2G26320…	0.04386		binding	0.04386
GO:0042623	ATPase activity, coupled	63 out of 2771 genes	0.023	319 out of 25291 genes	0.013	0.00155	AT5G08620|AT4G14790|AT3G26560|AT3G25610|AT3G47780|AT1G12840|AT1G27940|AT3G13080|AT2G37280|AT3G05740|AT3G06480|AT2G26910|AT1G27770|AT1G31970|AT1G17840|AT1G68710|AT1G53390|AT5G42270|AT3G28345|AT2G01130|AT3G10670|AT1G20750|AT3G53510|AT3G53480|AT3G47740|AT1G32490|AT4G27420|AT4G39850|AT1G35530|AT3G62700|AT1G72700|AT2G30950|AT1G31360|AT4G28620|AT3G13900|AT5G44070|AT3G16340|AT1G50250|AT3G05790|AT3G03300…	0.247784		ATPase activity, coupled	0.247784
GO:0016887	ATPase activity	78 out of 2771 genes	0.028	429 out of 25291 genes	0.017	0.00229	AT5G08620|AT4G14790|AT3G26560|AT3G25610|AT3G47780|AT1G12840|AT1G27940|AT1G21650|AT3G13080|AT2G37280|AT4G11730|AT3G05740|AT3G06480|AT2G26910|AT1G27770|AT1G31970|AT4G28000|AT1G17840|AT1G68710|AT1G53390|AT5G42270|AT4G30490|AT3G28345|AT2G01130|AT3G10670|AT4G36580|AT1G33360|AT4G15233|AT1G20750|AT3G53510|AT3G53480|AT3G47740|AT3G03060|AT3G28520|AT1G32490|AT4G27420|AT4G39850|AT1G35530|AT3G62700|AT2G28290…	0.216709		ATPase activity	0.216709
GO:0003774	motor activity	24 out of 2771 genes	0.009	86 out of 25291 genes	0.003	0.00635	AT5G06670|AT2G28620|AT1G18550|AT5G65460|AT4G39050|AT3G16060|AT2G47500|AT2G21380|AT3G58160|AT1G54560|AT1G20060|AT5G53310|AT5G43900|AT1G18370|AT3G20150|AT3G19960|AT3G63480|AT1G18410|AT3G51150|AT3G45850|AT4G27180|AT3G23670|AT1G17580|AT5G42490	0.477121		motor activity	0.477121
GO:0005215	transporter activity	181 out of 2771 genes	0.065	1258 out of 25291 genes	0.05	0.01	AT3G51870|AT5G52450|AT2G43330|AT1G12840|AT5G03280|AT5G12860|AT3G13080|AT1G27770|AT1G01790|AT1G68710|AT3G02850|AT2G16970|AT1G29830|AT3G10670|AT1G28230|AT1G21870|AT1G26690|AT1G13980|AT4G23460|AT3G53510|AT4G35410|AT1G10010|AT5G48410|AT1G14140|AT3G54830|AT4G19680|AT5G26340|AT5G44070|AT3G16340|AT1G47530|AT2G29410|AT1G32500|AT5G02170|AT2G16960|AT3G44910|AT5G27360|AT1G32050|AT4G28580|AT4G16370|AT1G26440…	0.113943		transporter activity	0.113943
GO:0005515	protein binding	216 out of 2771 genes	0.078	1542 out of 25291 genes	0.061	0.01	AT4G12720|AT3G26730|AT1G43850|AT5G41700|AT1G27770|AT4G21630|AT5G61960|AT1G54610|AT5G49060|AT5G03160|AT3G10670|AT3G56450|AT1G13980|AT4G23460|AT5G44280|AT3G56490|AT3G22590|AT4G25800|AT4G28600|AT4G27180|AT3G62190|AT1G17580|AT4G21100|AT3G13460|AT1G15880|AT3G19290|AT3G54170|AT1G21780|AT1G32500|AT2G42260|AT1G06110|AT2G28380|AT3G59260|AT5G48360|AT2G39940|AT2G30910|AT3G08910|AT3G15000|AT3G57290|AT5G48030…	0.106765		protein binding	0.106765
GO:0004437	inositol or phosphatidylinositol phosphatase activity	13 out of 2771 genes	0.005	34 out of 25291 genes	0.001	0.02	AT3G43220|AT4G05090|AT5G09290|AT2G43900|AT1G65580|AT5G63990|AT5G63980|AT3G51830|AT1G22620|AT2G32010|AT3G14205|AT1G34120|AT1G71710	0.69897		inositol or phosphatidylinositol phosphatase activity	0.69897
GO:0022857	transmembrane transporter activity	144 out of 2771 genes	0.052	970 out of 25291 genes	0.038	0.02	AT5G52450|AT2G43330|AT3G47780|AT1G12840|AT5G12860|AT3G13080|AT2G37280|AT1G27770|AT1G17840|AT1G01790|AT2G26510|AT1G08920|AT1G68710|AT1G53390|AT2G07698|AT1G15160|AT3G02850|AT1G19450|AT2G16970|AT3G28345|AT5G09400|AT1G29830|AT3G10670|AT2G28260|AT2G15290|AT1G28230|AT4G04760|AT1G80300|AT1G21870|AT1G26690|AT1G13980|AT2G02810|AT3G53510|AT1G10010|AT1G34580|AT3G47740|AT5G48410|AT4G39850|AT3G54830|AT1G50400…	0.13622		transmembrane transporter activity	0.13622
GO:0004386	helicase activity	35 out of 2771 genes	0.013	163 out of 25291 genes	0.006	0.02	AT5G08620|AT4G14790|AT3G26560|AT5G44800|AT3G05740|AT3G06480|AT5G67630|AT1G31970|AT3G03300|AT3G16840|AT1G26370|AT2G01130|AT4G33370|AT5G43530|AT1G06670|AT1G48310|AT2G16390|AT5G50340|AT1G33390|AT5G61140|AT1G20750|AT2G13370|AT5G63950|AT3G09720|AT1G32490|AT3G27730|AT1G59990|AT1G28180|AT1G35530|AT1G58050|AT5G63630|AT2G40770|AT1G16280|AT2G21450|AT1G31360	0.335792		helicase activity	0.335792
GO:0016788	hydrolase activity, acting on ester bonds	147 out of 2771 genes	0.053	996 out of 25291 genes	0.039	0.02	AT1G06550|AT1G03590|AT5G58050|AT5G63980|AT3G02830|AT1G47380|AT1G11290|AT5G41080|AT4G13885|AT2G20050|AT1G66970|AT3G48900|AT4G11240|AT1G28590|AT1G47270|AT3G50790|AT5G10790|AT3G14075|AT4G26790|AT5G42965|AT2G23540|AT5G24180|AT3G43920|AT4G17480|AT1G58520|AT4G13550|AT3G52050|AT3G01410|AT5G66720|AT5G07430|AT5G66050|AT2G27360|AT5G15170|AT1G65580|AT2G30350|AT2G41140|AT2G15230|AT4G09490|AT2G40570|AT4G33630…	0.133211		hydrolase activity, acting on ester bonds	0.133211
GO:0030695	GTPase regulator activity	22 out of 2771 genes	0.008	86 out of 25291 genes	0.003	0.02	AT4G29950|AT4G28550|AT1G01700|AT5G63860|AT3G43300|AT3G07880|AT3G60860|AT4G38200|AT5G19560|AT5G43900|AT4G21160|AT3G59570|AT2G44100|AT2G30710|AT1G04830|AT3G49350|AT5G52580|AT5G24390|AT4G32630|AT5G61530|AT4G24580|AT2G46710	0.425969		GTPase regulator activity	0.425969
GO:0060589	nucleoside-triphosphatase regulator activity	22 out of 2771 genes	0.008	89 out of 25291 genes	0.004	0.04	AT4G29950|AT4G28550|AT1G01700|AT5G63860|AT3G43300|AT3G07880|AT3G60860|AT4G38200|AT5G19560|AT5G43900|AT4G21160|AT3G59570|AT2G44100|AT2G30710|AT1G04830|AT3G49350|AT5G52580|AT5G24390|AT4G32630|AT5G61530|AT4G24580|AT2G46710	0.30103		nucleoside-triphosphatase regulator activity	0.30103
GO:0003777	microtubule motor activity	18 out of 2771 genes	0.006	66 out of 25291 genes	0.003	0.04	AT5G06670|AT2G28620|AT1G18550|AT5G65460|AT4G39050|AT3G16060|AT2G47500|AT2G21380|AT1G20060|AT1G18370|AT3G20150|AT3G63480|AT1G18410|AT3G51150|AT3G45850|AT4G27180|AT3G23670|AT5G42490	0.30103		microtubule motor activity	0.30103
GO:0008308	voltage-gated anion channel activity	8 out of 2771 genes	0.003	16 out of 25291 genes	0.001	0.04	AT5G57490|AT3G20000|AT1G50400|AT3G01280|AT5G15090|AT1G12480|AT5G26240|AT3G49920	0.477121		voltage-gated anion channel activity	0.477121
GO:0016744	transferase activity, transferring aldehyde or ketonic groups	7 out of 2771 genes	0.003	12 out of 25291 genes	0.000474477	0.04	AT2G34590|AT3G21500|AT4G15560|AT2G31810|AT3G48560|AT1G68890|AT5G13420	0.800906		transferase activity, transferring aldehyde or ketonic groups	0.800906
GO:0022804	active transmembrane transporter activity	88 out of 2771 genes	0.032	564 out of 25291 genes	0.022	0.04	AT5G52450|AT2G43330|AT3G47780|AT1G12840|AT5G12860|AT3G13080|AT2G37280|AT1G27770|AT1G17840|AT1G01790|AT1G08920|AT1G68710|AT1G53390|AT1G15160|AT1G19450|AT3G28345|AT3G10670|AT4G04760|AT1G80300|AT1G13980|AT3G53510|AT1G10010|AT1G34580|AT3G47740|AT4G39850|AT3G54830|AT1G31830|AT5G22910|AT5G05630|AT5G26340|AT5G55510|AT5G44070|AT3G19930|AT3G16340|AT1G47530|AT5G40930|AT4G28390|AT5G43610|AT5G02170|AT3G44910…	0.162727		active transmembrane transporter activity	0.162727
GO:0005083	small GTPase regulator activity	20 out of 2771 genes	0.007	81 out of 25291 genes	0.003	0.05	AT4G29950|AT4G28550|AT1G01700|AT3G07880|AT3G60860|AT4G38200|AT5G19560|AT5G43900|AT4G21160|AT3G59570|AT2G44100|AT2G30710|AT1G04830|AT3G49350|AT5G52580|AT5G24390|AT4G32630|AT5G61530|AT4G24580|AT2G46710	0.367977		small GTPase regulator activity	0.367977
GO:0016769	transferase activity, transferring nitrogenous groups	15 out of 2771 genes	0.005	52 out of 25291 genes	0.002	0.05	AT1G08490|AT5G46180|AT4G23590|AT2G13810|AT3G48730|AT5G10330|AT3G22200|AT3G48790|AT5G51690|AT1G62800|AT4G33680|AT5G04620|AT1G50090|AT1G71920|AT2G20610	0.39794		transferase activity, transferring nitrogenous groups	0.39794
GO:0016903	oxidoreductase activity, acting on the aldehyde or oxo group of donors	18 out of 2771 genes	0.006	69 out of 25291 genes	0.003	0.05	AT1G44170|AT4G33790|AT2G39800|AT3G44560|AT3G43600|AT1G79530|AT5G62530|AT3G13450|AT1G79440|AT5G50850|AT1G01090|AT1G30120|AT1G59900|AT2G14170|AT2G34590|AT3G44540|AT3G55610|AT5G22500	0.30103		oxidoreductase activity, acting on the aldehyde or oxo group of donors	0.30103

## Sheet: CHH-Only
	Term	Observed Frequency	OF %	Expected Frequency	EF%	p-value	Genes	log 10 Rfi/Rfr		Term	log 10 Rfi/Rfr
GO:0004871	signal transducer activity	5 out of 54 genes	0.093	375 out of 25291 genes	0.015	0.03	AT5G46510|AT4G16940|AT4G19500|AT4G16920|AT5G07210	0.792392		signal transducer activity	0.792392
GO:0004872	receptor activity	4 out of 54 genes	0.074	194 out of 25291 genes	0.008	0.03	AT5G46510|AT4G16940|AT4G16920|AT4G19500	0.966142		receptor activity	0.966142
GO:0004888	transmembrane receptor activity	4 out of 54 genes	0.074	159 out of 25291 genes	0.006	0.03	AT5G46510|AT4G16940|AT4G16920|AT4G19500	1.09108		transmembrane receptor activity	1.09108
GO:0060089	molecular transducer activity	5 out of 54 genes	0.093	375 out of 25291 genes	0.015	0.03	AT5G46510|AT4G16940|AT4G19500|AT4G16920|AT5G07210	0.792392		molecular transducer activity	0.792392
