# Supplementary material for: Herbicide injury induces DNA methylome alterations in Arabidopsis
Source: PeerJ. 2017 Jul 20;5:e3560. doi: 10.7717/peerj.3560 (PMC5522609; doi:10.7717/peerj.3560)
Supplement: Supplemental Information 14 — All DMR-associated genes following glyphosate stress (this work), biotic stress mimic (1), or phosphate starvation (2). References: 1. Dowen RH, Pelizzola M, Schmitz RJ, Lister R, Dowen JM, Nery JR, et al. Widespread dynamic DNA methylation in response to biotic stress. Proceedings of the National Academy of Sciences. 2012;109(32):E2183–E91. 2. Yong-Villalobos L, González-Morales SI, Wrobel K, Gutiérrez-Alanis D, Cervantes-Peréz SA, Hayano-Kanashiro C, et al. Methylome analysis reveals an important role for epigenetic changes in the regulation of the Arabidopsis response to phosphate starvation. Proceedings of the National Academy of Sciences. 2015;112(52):E7293–E302. [file peerj-05-3560-s014.xlsx]

## Sheet: OverlappingandNonoverlappingDMR
PSR and SA and glyphosate	SA and PSR NOT glyphosate	glyphosate and PSR NOT SA	glyphosate and SA NOT PSR	glyphosate only	SA only	PSR only
at1g17450	at1g08590	at1g01340	at1g07880	at1g01020	at1g01350	at1g01010
at1g22060	at1g13340	at1g05620	at1g11160	at1g01090	at1g01750	at1g01040
at1g47400	at1g13470	at1g06490	at1g17400	at1g01110	at1g02210	at1g02470
at1g62760	at1g17600	at1g09460	at1g19100	at1g01320	at1g03905	at1g02500
at1g67520	at1g26420	at1g11180	at1g27470	at1g01440	at1g04080	at1g02520
at3g17320	at1g36622	at1g11720	at1g28480	at1g01520	at1g04790	at1g02890
at3g29970	at1g43910	at1g12240	at1g30890	at1g01540	at1g06475	at1g03540
at4g08300	at1g45015	at1g16800	at1g32375	at1g01680	at1g06580	at1g03940
at4g08450	at1g47960	at1g20650	at1g32380	at1g01690	at1g06900	at1g04110
at4g08870	at1g55020	at1g20840	at1g36150	at1g01700	at1g08860	at1g05360
at5g15780	at1g61360	at1g20860	at1g36980	at1g01790	at1g08940	at1g06160
at5g46700	at1g67000	at1g21250	at1g43580	at1g01910	at1g09160	at1g07390
at5g67340	at1g80070	at1g21630	at1g43650	at1g02270	at1g11310	at1g08090
	at2g04100	at1g21930	at1g44080	at1g02290	at1g12990	at1g08310
	at2g04495	at1g24540	at1g44170	at1g02305	at1g14370	at1g08430
	at2g04795	at1g24706	at1g52500	at1g02420	at1g15940	at1g12020
	at2g05540	at1g26240	at1g58602	at1g02430	at1g16090	at1g12210
	at2g05580	at1g26380	at1g59660	at1g02740	at1g16250	at1g12280
	at2g10560	at1g28180	at1g65350	at1g02750	at1g16650	at1g12730
	at2g11810	at1g32200	at1g66235	at1g02860	at1g16780	at1g16160
	at2g12200	at1g32950	at1g66880	at1g02870	at1g18660	at1g16370
	at2g14580	at1g50050	at1g67890	at1g02970	at1g18870	at1g16710
	at2g18690	at1g50840	at1g76660	at1g02980	at1g19394	at1g17290
	at2g24720	at1g52320	at2g05120	at1g03040	at1g20400	at1g17420
	at2g26215	at1g54040	at2g05760	at1g03060	at1g21450	at1g19220
	at2g29630	at1g55860	at2g06255	at1g03200	at1g24220	at1g19720
	at2g32240	at1g57630	at2g07715	at1g03240	at1g24380	at1g20080
	at3g14470	at1g57770	at2g13950	at1g03270	at1g24530	at1g20390
	at3g15518	at1g61480	at2g14440	at1g03380	at1g28307	at1g21230
	at3g21520	at1g61610	at2g15042	at1g03445	at1g28370	at1g21240
	at3g23450	at1g62540	at2g17305	at1g03470	at1g29080	at1g21529
	at3g28210	at1g62560	at2g17787	at1g03590	at1g29640	at1g21940
	at3g42670	at1g66570	at2g22490	at1g03810	at1g29724	at1g22150
	at3g63380	at1g67900	at2g22890	at1g04370	at1g30650	at1g24100
	at4g04490	at1g67980	at2g25370	at1g04390	at1g30790	at1g24160
	at4g04540	at1g68400	at2g25410	at1g04425	at1g32000	at1g26250
	at4g15200	at1g71920	at2g26260	at1g04470	at1g32730	at1g26270
	at4g16890	at1g74260	at2g34790	at1g04625	at1g32850	at1g26390
	at4g25960	at1g74290	at2g41920	at1g04700	at1g33500	at1g26410
	at4g38560	at1g74770	at2g44100	at1g04750	at1g33730	at1g27180
	at5g02860	at1g76990	at3g01320	at1g04780	at1g33960	at1g29230
	at5g17860	at2g03140	at3g03260	at1g04830	at1g34310	at1g29450
	at5g19820	at2g07682	at3g11290	at1g04850	at1g34440	at1g29560
	at5g27950	at2g07698	at3g16680	at1g04880	at1g34470	at1g30410
	at5g38000	at2g07721	at3g18330	at1g04920	at1g35030	at1g30510
	at5g47980	at2g14170	at3g24360	at1g04930	at1g35040	at1g30530
	at5g52710	at2g16270	at3g28410	at1g04940	at1g35140	at1g30560
	at5g54280	at2g18150	at3g29770	at1g04945	at1g35210	at1g30870
		at2g18530	at3g30770	at1g04970	at1g35230	at1g31885
		at2g22930	at3g43300	at1g05055	at1g35240	at1g32060
		at2g23050	at3g44935	at1g05090	at1g35242	at1g32450
		at2g24980	at3g45430	at1g05160	at1g35260	at1g32960
		at2g25160	at3g45770	at1g05250	at1g35310	at1g32970
		at2g26760	at3g46180	at1g05590	at1g35350	at1g33030
		at2g33770	at3g47040	at1g05740	at1g35365	at1g33640
		at2g36750	at3g48120	at1g05880	at1g35435	at1g34047
		at2g39770	at3g48770	at1g05910	at1g35630	at1g34355
		at3g02850	at3g51580	at1g05950	at1g35710	at1g35625
		at3g05680	at3g52050	at1g06110	at1g35820	at1g35660
		at3g07070	at3g59700	at1g06148	at1g35900	at1g36240
		at3g08500	at3g63440	at1g06250	at1g36000	at1g37130
		at3g09080	at4g00140	at1g06290	at1g36030	at1g43140
		at3g09830	at4g00830	at1g06430	at1g36095	at1g44030
		at3g11670	at4g03090	at1g06460	at1g36160	at1g44835
		at3g14205	at4g04960	at1g06500	at1g36272	at1g48300
		at3g14700	at4g10490	at1g06510	at1g36310	at1g49720
		at3g16180	at4g10603	at1g06550	at1g36340	at1g49800
		at3g18290	at4g10870	at1g06630	at1g36390	at1g49990
		at3g21700	at4g11070	at1g06670	at1g36675	at1g50180
		at3g21870	at4g11240	at1g06720	at1g36920	at1g50240
		at3g24190	at4g12690	at1g06790	at1g36925	at1g50732
		at3g25610	at4g14400	at1g06820	at1g37000	at1g51760
		at3g27670	at4g15096	at1g07040	at1g38950	at1g51800
		at3g43190	at4g23100	at1g07080	at1g40083	at1g52870
		at3g45140	at4g23210	at1g07220	at1g41820	at1g52940
		at3g47340	at4g23440	at1g07300	at1g42190	at1g53160
		at3g48260	at4g24300	at1g07420	at1g42470	at1g53310
		at3g49290	at4g25515	at1g07570	at1g42710	at1g53800
		at3g49980	at4g30770	at1g07650	at1g42970	at1g54030
		at3g51870	at4g32560	at1g07800	at1g43040	at1g54095
		at3g54580	at4g34400	at1g07830	at1g43080	at1g55790
		at3g54590	at5g01550	at1g07930	at1g43190	at1g58280
		at3g59570	at5g02480	at1g07980	at1g43310	at1g60800
		at4g01820	at5g09290	at1g08190	at1g43415	at1g61370
		at4g02710	at5g15170	at1g08220	at1g43630	at1g61520
		at4g03140	at5g16715	at1g08490	at1g43665	at1g61550
		at4g03380	at5g18720	at1g08620	at1g43730	at1g61760
		at4g04930	at5g24320	at1g08720	at1g43790	at1g61810
		at4g05140	at5g26240	at1g08740	at1g43810	at1g62280
		at4g05520	at5g28370	at1g08810	at1g44100	at1g62310
		at4g10060	at5g28642	at1g08920	at1g44740	at1g62580
		at4g13390	at5g33370	at1g09026	at1g44910	at1g63020
		at4g15540	at5g34581	at1g09060	at1g45063	at1g63100
		at4g15590	at5g34940	at1g09190	at1g46696	at1g63530
		at4g16370	at5g35160	at1g09195	at1g46912	at1g63540
		at4g16920	at5g35390	at1g09220	at1g47370	at1g63750
		at4g17140	at5g38830	at1g09245	at1g47840	at1g64310
		at4g20460	at5g39200	at1g09260	at1g47885	at1g64610
		at4g30710	at5g39690	at1g09420	at1g48390	at1g64720
		at4g36430	at5g44840	at1g09450	at1g48600	at1g64950
		at4g37610	at5g48410	at1g09470	at1g48690	at1g65730
		at5g04950	at5g48960	at1g09490	at1g49050	at1g66180
		at5g04960	at5g49470	at1g09640	at1g49260	at1g66360
		at5g05400	at5g51590	at1g09660	at1g49300	at1g67120
		at5g06670	at5g51890	at1g09800	at1g49710	at1g67500
		at5g09660	at5g52980	at1g09840	at1g50870	at1g67710
		at5g13530	at5g59010	at1g09870	at1g51620	at1g67870
		at5g13740	at5g59670	at1g10010	at1g51830	at1g68050
		at5g24200	at5g65460	at1g10190	at1g52360	at1g68440
		at5g26570		at1g10250	at1g52890	at1g68850
		at5g26690		at1g10300	at1g52905	at1g69790
		at5g27890		at1g10310	at1g53850	at1g70130
		at5g28415		at1g10390	at1g54310	at1g70140
		at5g37630		at1g10417	at1g55610	at1g70290
		at5g37840		at1g10490	at1g56670	at1g70320
		at5g38910		at1g10522	at1g58007	at1g70760
		at5g40850		at1g10540	at1g58430	at1g71140
		at5g41280		at1g10586	at1g59500	at1g72180
		at5g41750		at1g10620	at1g59865	at1g72330
		at5g41780		at1g10670	at1g60740	at1g72890
		at5g42930		at1g10745	at1g60995	at1g73220
		at5g45105		at1g10760	at1g61380	at1g73710
		at5g45380		at1g10820	at1g61420	at1g74100
		at5g46330		at1g10920	at1g61850	at1g74270
		at5g51150		at1g10940	at1g62225	at1g74580
		at5g53110		at1g10970	at1g62790	at1g74590
		at5g55250		at1g11050	at1g63290	at1g78020
		at5g57100		at1g11070	at1g63410	at1g78360
		at5g58940		at1g11265	at1g63480	at1g79280
		at5g63680		at1g11290	at1g64260	at1g79400
				at1g11300	at1g65486	at1g79710
				at1g11340	at1g65950	at1g80840
				at1g11350	at1g66070	at2g01530
				at1g11593	at1g66300	at2g01910
				at1g11785	at1g66310	at2g01918
				at1g11905	at1g66320	at2g01950
				at1g11910	at1g66640	at2g02120
				at1g11950	at1g66890	at2g02720
				at1g12050	at1g66920	at2g04040
				at1g12140	at1g67130	at2g04070
				at1g12150	at1g67290	at2g04400
				at1g12160	at1g67350	at2g04460
				at1g12300	at1g67540	at2g05520
				at1g12470	at1g67623	at2g05620
				at1g12480	at1g68640	at2g05632
				at1g12665	at1g69090	at2g05710
				at1g12840	at1g69960	at2g05790
				at1g12850	at1g70070	at2g07671
				at1g12880	at1g70790	at2g07673
				at1g12970	at1g72930	at2g07675
				at1g13030	at1g73180	at2g07676
				at1g13040	at1g73960	at2g07678
				at1g13270	at1g77680	at2g07687
				at1g13540	at1g78130	at2g07722
				at1g13560	at1g79500	at2g07751
				at1g13630	at1g79560	at2g07777
				at1g13730	at1g80280	at2g13540
				at1g13820	at1g80530	at2g14290
				at1g13970	at2g01021	at2g14760
				at1g13980	at2g01023	at2g14878
				at1g13990	at2g01310	at2g15020
				at1g14010	at2g01580	at2g15220
				at1g14030	at2g01600	at2g15780
				at1g14130	at2g01680	at2g15830
				at1g14140	at2g01870	at2g15880
				at1g14170	at2g02030	at2g15900
				at1g14190	at2g02490	at2g15960
				at1g14340	at2g02520	at2g15980
				at1g14360	at2g02955	at2g16140
				at1g14380	at2g03250	at2g16230
				at1g14390	at2g03330	at2g16430
				at1g14560	at2g03670	at2g16640
				at1g14650	at2g03840	at2g16676
				at1g14688	at2g03913	at2g16870
				at1g14690	at2g04020	at2g17033
				at1g14780	at2g04063	at2g17500
				at1g15010	at2g04305	at2g17525
				at1g15015	at2g04500	at2g17780
				at1g15150	at2g04740	at2g17930
				at1g15160	at2g04940	at2g18470
				at1g15215	at2g05210	at2g18660
				at1g15340	at2g05350	at2g18720
				at1g15560	at2g05370	at2g18760
				at1g15780	at2g05380	at2g19660
				at1g15860	at2g05420	at2g19900
				at1g15880	at2g05440	at2g20320
				at1g16070	at2g05920	at2g20560
				at1g16080	at2g06005	at2g21045
				at1g16240	at2g06050	at2g22070
				at1g16280	at2g06500	at2g22125
				at1g16290	at2g06541	at2g22470
				at1g16330	at2g06908	at2g22560
				at1g16520	at2g06925	at2g22770
				at1g16610	at2g07000	at2g22860
				at1g16670	at2g07040	at2g25680
				at1g16700	at2g07170	at2g25730
				at1g16750	at2g07310	at2g25900
				at1g16760	at2g07440	at2g26010
				at1g16830	at2g07521	at2g26150
				at1g16858	at2g07560	at2g26560
				at1g16860	at2g07680	at2g26660
				at1g16980	at2g07689	at2g28190
				at1g17000	at2g07724	at2g28250
				at1g17050	at2g07732	at2g28470
				at1g17070	at2g07734	at2g29940
				at1g17130	at2g07738	at2g30600
				at1g17150	at2g07739	at2g31960
				at1g17220	at2g07750	at2g31970
				at1g17240	at2g07768	at2g32400
				at1g17280	at2g07827	at2g32500
				at1g17350	at2g09388	at2g34100
				at1g17370	at2g09838	at2g34210
				at1g17550	at2g09970	at2g34290
				at1g17580	at2g10020	at2g34600
				at1g17640	at2g10440	at2g34710
				at1g17720	at2g10940	at2g35920
				at1g17745	at2g10965	at2g36530
				at1g17750	at2g11271	at2g36724
				at1g17760	at2g11520	at2g36730
				at1g17790	at2g11890	at2g38250
				at1g17820	at2g12290	at2g38440
				at1g17840	at2g12405	at2g38823
				at1g17870	at2g12465	at2g39730
				at1g17890	at2g12557	at2g40180
				at1g17920	at2g12875	at2g41730
				at1g17970	at2g12905	at2g42980
				at1g17990	at2g12940	at2g43880
				at1g18010	at2g12945	at2g45920
				at1g18040	at2g13100	at2g46530
				at1g18090	at2g13272	at2g46740
				at1g18130	at2g13500	at2g47000
				at1g18180	at2g13770	at2g47020
				at1g18270	at2g13790	at2g47275
				at1g18310	at2g13960	at2g47950
				at1g18360	at2g14060	at3g01310
				at1g18370	at2g14110	at3g01345
				at1g18410	at2g14160	at3g01480
				at1g18470	at2g14365	at3g02260
				at1g18490	at2g14560	at3g03640
				at1g18540	at2g14610	at3g03790
				at1g18550	at2g14660	at3g04050
				at1g18560	at2g14720	at3g04340
				at1g18610	at2g15110	at3g04450
				at1g18810	at2g15130	at3g05340
				at1g18900	at2g15300	at3g05630
				at1g19140	at2g15440	at3g05690
				at1g19170	at2g15535	at3g06290
				at1g19230	at2g15630	at3g06530
				at1g19240	at2g15790	at3g07160
				at1g19270	at2g16015	at3g08720
				at1g19310	at2g16030	at3g09162
				at1g19410	at2g16190	at3g09270
				at1g19450	at2g16668	at3g09910
				at1g19485	at2g17890	at3g10320
				at1g19520	at2g18520	at3g10710
				at1g19550	at2g19090	at3g11570
				at1g19600	at2g19960	at3g11964
				at1g19650	at2g20010	at3g13065
				at1g19835	at2g20613	at3g13100
				at1g19940	at2g20820	at3g14270
				at1g20010	at2g21040	at3g14460
				at1g20060	at2g21270	at3g14630
				at1g20110	at2g22970	at3g14720
				at1g20200	at2g23200	at3g14730
				at1g20460	at2g23390	at3g17190
				at1g20560	at2g24120	at3g17690
				at1g20570	at2g24990	at3g18840
				at1g20640	at2g25800	at3g18845
				at1g20670	at2g26140	at3g19970
				at1g20750	at2g26600	at3g20660
				at1g20967	at2g27610	at3g21090
				at1g20980	at2g27990	at3g22142
				at1g21330	at2g28755	at3g22150
				at1g21410	at2g29890	at3g22275
				at1g21600	at2g30130	at3g22850
				at1g21650	at2g30200	at3g25690
				at1g21780	at2g31360	at3g26030
				at1g21810	at2g31830	at3g26090
				at1g21835	at2g31890	at3g26310
				at1g21870	at2g33760	at3g26490
				at1g22120	at2g34120	at3g26614
				at1g22200	at2g34680	at3g26840
				at1g22240	at2g35120	at3g27170
				at1g22250	at2g35280	at3g27870
				at1g22460	at2g35610	at3g28690
				at1g22580	at2g35890	at3g28930
				at1g22620	at2g36490	at3g30340
				at1g22651	at2g36700	at3g42640
				at1g22670	at2g38070	at3g43110
				at1g22750	at2g39140	at3g43250
				at1g22760	at2g39180	at3g44510
				at1g22882	at2g40116	at3g44755
				at1g22950	at2g41390	at3g45070
				at1g22970	at2g41460	at3g45330
				at1g23030	at2g41500	at3g45720
				at1g23230	at2g44240	at3g46240
				at1g23260	at2g45100	at3g46330
				at1g23340	at2g45900	at3g46490
				at1g23360	at2g47250	at3g46600
				at1g23460	at3g01175	at3g47110
				at1g23510	at3g01540	at3g47420
				at1g23670	at3g03470	at3g47480
				at1g23700	at3g04220	at3g47930
				at1g23720	at3g04380	at3g48290
				at1g23820	at3g05440	at3g48300
				at1g23890	at3g05540	at3g48420
				at1g23935	at3g09390	at3g50370
				at1g23950	at3g10180	at3g51970
				at1g23990	at3g11980	at3g52490
				at1g24068	at3g13210	at3g53150
				at1g24095	at3g13750	at3g53360
				at1g24210	at3g14610	at3g53620
				at1g24267	at3g14670	at3g53680
				at1g24340	at3g15390	at3g54670
				at1g24440	at3g17400	at3g54700
				at1g24460	at3g19350	at3g54770
				at1g24570	at3g20950	at3g55160
				at1g24610	at3g21295	at3g55980
				at1g24764	at3g21300	at3g56000
				at1g24822	at3g21490	at3g56040
				at1g24851	at3g21900	at3g57240
				at1g24880	at3g22230	at3g58810
				at1g25054	at3g22400	at3g59140
				at1g25097	at3g22600	at3g59884
				at1g25098	at3g22790	at3g60530
				at1g25211	at3g22968	at3g60840
				at1g25220	at3g23920	at3g61990
				at1g25260	at3g24340	at3g62590
				at1g25375	at3g26210	at3g63070
				at1g25500	at3g26480	at4g00450
				at1g25540	at3g26510	at4g00500
				at1g26208	at3g26860	at4g00900
				at1g26260	at3g27180	at4g00910
				at1g26370	at3g27190	at4g01330
				at1g26440	at3g27530	at4g01350
				at1g26500	at3g27890	at4g01470
				at1g26530	at3g28020	at4g01700
				at1g26540	at3g28155	at4g02050
				at1g26610	at3g28390	at4g02320
				at1g26640	at3g28510	at4g02660
				at1g26680	at3g28530	at4g03100
				at1g26690	at3g28540	at4g04330
				at1g26710	at3g28820	at4g04510
				at1g26761	at3g28918	at4g04610
				at1g26762	at3g28960	at4g04990
				at1g26910	at3g29010	at4g05631
				at1g26940	at3g29075	at4g07400
				at1g27110	at3g29080	at4g08290
				at1g27150	at3g29255	at4g08390
				at1g27170	at3g29580	at4g08480
				at1g27220	at3g29590	at4g08920
				at1g27360	at3g29638	at4g09030
				at1g27410	at3g29720	at4g09600
				at1g27430	at3g29760	at4g09680
				at1g27480	at3g29780	at4g09780
				at1g27540	at3g29790	at4g10260
				at1g27600	at3g29810	at4g10340
				at1g27770	at3g30210	at4g10500
				at1g27850	at3g30220	at4g10720
				at1g27940	at3g30430	at4g11110
				at1g28000	at3g30520	at4g12120
				at1g28040	at3g30778	at4g13690
				at1g28200	at3g30805	at4g14090
				at1g28230	at3g30845	at4g14140
				at1g28270	at3g31350	at4g14368
				at1g28304	at3g31400	at4g14760
				at1g28320	at3g31402	at4g15120
				at1g28323	at3g31900	at4g15180
				at1g28465	at3g31950	at4g15270
				at1g28510	at3g32036	at4g15990
				at1g28540	at3g32047	at4g16008
				at1g28590	at3g32050	at4g16340
				at1g28630	at3g32052	at4g16480
				at1g28920	at3g32090	at4g16900
				at1g28960	at3g32180	at4g17460
				at1g29050	at3g32260	at4g18120
				at1g29150	at3g32330	at4g18250
				at1g29400	at3g32410	at4g18600
				at1g29440	at3g33187	at4g19020
				at1g29590	at3g33293	at4g19530
				at1g29650	at3g33520	at4g19980
				at1g29740	at3g42050	at4g20210
				at1g29750	at3g42310	at4g20362
				at1g29770	at3g42385	at4g20430
				at1g29830	at3g42723	at4g20820
				at1g29940	at3g42728	at4g21250
				at1g30110	at3g42780	at4g21390
				at1g30120	at3g42990	at4g21470
				at1g30240	at3g43120	at4g21760
				at1g30300	at3g43150	at4g22217
				at1g30490	at3g43160	at4g22460
				at1g30550	at3g43340	at4g22470
				at1g30820	at3g43540	at4g23000
				at1g30845	at3g43750	at4g23600
				at1g31030	at3g43870	at4g23700
				at1g31090	at3g44100	at4g23920
				at1g31210	at3g44180	at4g25560
				at1g31260	at3g44200	at4g25640
				at1g31280	at3g44210	at4g26320
				at1g31360	at3g44235	at4g26680
				at1g31540	at3g44261	at4g27030
				at1g31630	at3g44600	at4g27850
				at1g31640	at3g44704	at4g28410
				at1g31730	at3g44800	at4g28490
				at1g31750	at3g44830	at4g28930
				at1g31830	at3g45020	at4g30110
				at1g31850	at3g45190	at4g31210
				at1g31880	at3g45210	at4g32250
				at1g31970	at3g45450	at4g32850
				at1g32020	at3g45670	at4g33030
				at1g32050	at3g46000	at4g33770
				at1g32120	at3g46620	at4g34200
				at1g32140	at3g46710	at4g34730
				at1g32270	at3g46904	at4g35090
				at1g32350	at3g46970	at4g36140
				at1g32430	at3g47300	at4g36470
				at1g32490	at3g47470	at4g37370
				at1g32500	at3g47540	at4g37590
				at1g32550	at3g49140	at4g37670
				at1g32585	at3g49330	at4g37680
				at1g32590	at3g49500	at4g37710
				at1g32700	at3g50470	at4g38340
				at1g32790	at3g50480	at4g39210
				at1g32810	at3g50620	at4g39640
				at1g33070	at3g52170	at4g39675
				at1g33100	at3g54190	at4g39980
				at1g33200	at3g55410	at5g01180
				at1g33340	at3g55430	at5g01360
				at1g33360	at3g56960	at5g02180
				at1g33370	at3g57090	at5g02310
				at1g33390	at3g57880	at5g04230
				at1g33550	at3g60050	at5g05730
				at1g33720	at3g60180	at5g06640
				at1g33855	at3g60960	at5g06905
				at1g33890	at3g62030	at5g07570
				at1g33900	at4g00170	at5g10340
				at1g33910	at4g00380	at5g10800
				at1g33970	at4g00700	at5g13010
				at1g33990	at4g00770	at5g13320
				at1g34120	at4g01460	at5g13770
				at1g34220	at4g01516	at5g14020
				at1g34230	at4g01520	at5g14120
				at1g34250	at4g02390	at5g14550
				at1g34315	at4g02520	at5g14780
				at1g34390	at4g02750	at5g14880
				at1g34392	at4g03110	at5g15070
				at1g34550	at4g03190	at5g15360
				at1g34580	at4g03565	at5g15480
				at1g34620	at4g03570	at5g17165
				at1g34650	at4g03827	at5g17390
				at1g35130	at4g03830	at5g18030
				at1g35220	at4g03950	at5g19740
				at1g35280	at4g04110	at5g20280
				at1g35320	at4g04450	at5g20410
				at1g35430	at4g04460	at5g20610
				at1g35460	at4g04601	at5g20790
				at1g35490	at4g04650	at5g20960
				at1g35515	at4g05080	at5g22300
				at1g35530	at4g05360	at5g23950
				at1g35545	at4g05370	at5g24155
				at1g35620	at4g05620	at5g24350
				at1g35670	at4g05632	at5g24380
				at1g35690	at4g06479	at5g24920
				at1g35930	at4g06490	at5g25040
				at1g36140	at4g06536	at5g25250
				at1g36590	at4g06599	at5g25260
				at1g36630	at4g06639	at5g25930
				at1g37150	at4g06688	at5g26270
				at1g38213	at4g06740	at5g26280
				at1g38214	at4g06746	at5g26670
				at1g38215	at4g07524	at5g26730
				at1g38216	at4g07526	at5g27600
				at1g38217	at4g07675	at5g27845
				at1g38218	at4g07868	at5g28080
				at1g38219	at4g07932	at5g28262
				at1g38220	at4g07990	at5g28630
				at1g38221	at4g08025	at5g28840
				at1g38222	at4g08073	at5g35050
				at1g38223	at4g08140	at5g35170
				at1g38224	at4g08190	at5g35407
				at1g38225	at4g08263	at5g35425
				at1g38226	at4g08267	at5g36120
				at1g38227	at4g08350	at5g37010
				at1g38228	at4g08470	at5g37130
				at1g38229	at4g08500	at5g39050
				at1g38230	at4g08593	at5g39110
				at1g38231	at4g08620	at5g39190
				at1g38232	at4g08670	at5g40820
				at1g38233	at4g08685	at5g42400
				at1g38234	at4g08691	at5g43350
				at1g38235	at4g08700	at5g44410
				at1g38236	at4g08850	at5g44530
				at1g38237	at4g08895	at5g44578
				at1g38238	at4g08910	at5g45000
				at1g38239	at4g08940	at5g45230
				at1g38240	at4g09587	at5g45720
				at1g38241	at4g10150	at5g46450
				at1g38242	at4g10160	at5g46460
				at1g38243	at4g10210	at5g47820
				at1g38244	at4g10380	at5g49152
				at1g38245	at4g10620	at5g52100
				at1g38246	at4g10695	at5g52700
				at1g38247	at4g10850	at5g52790
				at1g38248	at4g11170	at5g52920
				at1g38249	at4g11230	at5g53048
				at1g38250	at4g11670	at5g54810
				at1g38251	at4g11790	at5g55410
				at1g38252	at4g12230	at5g55820
				at1g38253	at4g12420	at5g56630
				at1g38254	at4g12430	at5g57180
				at1g38255	at4g12810	at5g57610
				at1g38256	at4g13420	at5g58620
				at1g38257	at4g13820	at5g59070
				at1g38258	at4g13890	at5g59650
				at1g38259	at4g13920	at5g63780
				at1g38260	at4g14980	at5g63920
				at1g39510	at4g15890	at5g64000
				at1g39590	at4g16015	at5g64390
				at1g40080	at4g16960	at5g66520
				at1g40095	at4g17453	at5g66760
				at1g40118	at4g17590	at5g67385
				at1g40137	at4g17713
				at1g41650	at4g17810
				at1g41660	at4g17870
				at1g42560	at4g18150
				at1g42980	at4g18375
				at1g43245	at4g18470
				at1g43620	at4g19130
				at1g43670	at4g19900
				at1g43850	at4g20170
				at1g44000	at4g20480
				at1g44085	at4g21030
				at1g44820	at4g21670
				at1g44875	at4g22590
				at1g45120	at4g23060
				at1g45221	at4g23130
				at1g46120	at4g23150
				at1g46624	at4g23340
				at1g47210	at4g24680
				at1g47230	at4g25020
				at1g47270	at4g26350
				at1g47290	at4g26600
				at1g47380	at4g27370
				at1g47500	at4g28010
				at1g47530	at4g28980
				at1g47550	at4g29890
				at1g47640	at4g30130
				at1g47650	at4g30150
				at1g47710	at4g31780
				at1g47770	at4g31800
				at1g47860	at4g32295
				at1g47890	at4g32375
				at1g48095	at4g32870
				at1g48110	at4g33050
				at1g48200	at4g33300
				at1g48310	at4g35770
				at1g48400	at4g37830
				at1g48770	at4g38050
				at1g48810	at4g38550
				at1g48820	at4g39120
				at1g48830	at5g01730
				at1g48900	at5g02030
				at1g49005	at5g04130
				at1g49170	at5g04260
				at1g49180	at5g04780
				at1g49190	at5g06050
				at1g49270	at5g07400
				at1g49320	at5g07410
				at1g49500	at5g08020
				at1g49510	at5g09860
				at1g49670	at5g11680
				at1g49770	at5g11880
				at1g49790	at5g13310
				at1g50090	at5g13680
				at1g50160	at5g14260
				at1g50190	at5g14610
				at1g50220	at5g15630
				at1g50250	at5g16270
				at1g50400	at5g17160
				at1g50580	at5g17790
				at1g50590	at5g18570
				at1g50670	at5g18840
				at1g50710	at5g19160
				at1g50970	at5g19240
				at1g51080	at5g19610
				at1g51110	at5g20050
				at1g51160	at5g22520
				at1g51200	at5g22560
				at1g51210	at5g22608
				at1g51340	at5g23010
				at1g51370	at5g23380
				at1g51510	at5g23720
				at1g51538	at5g24210
				at1g51600	at5g24370
				at1g51610	at5g24520
				at1g51630	at5g24780
				at1g51720	at5g25880
				at1g51730	at5g26040
				at1g51740	at5g26170
				at1g51745	at5g26600
				at1g51805	at5g26610
				at1g51810	at5g26840
				at1g51860	at5g26848
				at1g51910	at5g27220
				at1g52110	at5g27247
				at1g52150	at5g27280
				at1g52180	at5g27440
				at1g52340	at5g27570
				at1g52343	at5g27606
				at1g52415	at5g27680
				at1g52510	at5g27944
				at1g52610	at5g28040
				at1g52640	at5g28090
				at1g52660	at5g28150
				at1g52670	at5g28410
				at1g52990	at5g28465
				at1g53110	at5g28491
				at1g53140	at5g28520
				at1g53265	at5g28821
				at1g53390	at5g28885
				at1g53400	at5g28931
				at1g53410	at5g29231
				at1g53420	at5g29560
				at1g53550	at5g29807
				at1g53580	at5g30510
				at1g53640	at5g31412
				at1g53705	at5g32590
				at1g53720	at5g32597
				at1g53760	at5g32613
				at1g53790	at5g33355
				at1g53840	at5g33393
				at1g54060	at5g33421
				at1g54115	at5g33806
				at1g54220	at5g34829
				at1g54320	at5g34850
				at1g54470	at5g34882
				at1g54490	at5g34930
				at1g54510	at5g35069
				at1g54560	at5g35338
				at1g54610	at5g35360
				at1g54700	at5g35450
				at1g54710	at5g35490
				at1g54790	at5g35603
				at1g54840	at5g35770
				at1g54940	at5g35920
				at1g54990	at5g35940
				at1g55050	at5g36080
				at1g55120	at5g36280
				at1g55220	at5g36300
				at1g55230	at5g36480
				at1g55270	at5g36890
				at1g55400	at5g37610
				at1g55490	at5g37667
				at1g55530	at5g37770
				at1g55710	at5g37790
				at1g55750	at5g38010
				at1g55940	at5g38040
				at1g56140	at5g38190
				at1g56160	at5g38210
				at1g56165	at5g38250
				at1g56260	at5g38344
				at1g56290	at5g38450
				at1g56310	at5g38550
				at1g56340	at5g38560
				at1g56430	at5g38710
				at1g56510	at5g38860
				at1g56530	at5g39670
				at1g56610	at5g39680
				at1g56612	at5g39860
				at1g56630	at5g39865
				at1g56650	at5g40030
				at1g56750	at5g42260
				at1g56900	at5g42530
				at1g56960	at5g42640
				at1g56970	at5g43110
				at1g57490	at5g43745
				at1g57570	at5g43810
				at1g57590	at5g44640
				at1g57800	at5g44660
				at1g58040	at5g44740
				at1g58050	at5g44930
				at1g58100	at5g45020
				at1g58110	at5g45110
				at1g58242	at5g45190
				at1g58520	at5g45550
				at1g59453	at5g45573
				at1g59510	at5g45730
				at1g59520	at5g47130
				at1g59580	at5g47220
				at1g59680	at5g47410
				at1g59720	at5g47860
				at1g59725	at5g48545
				at1g59780	at5g48740
				at1g59833	at5g48880
				at1g59900	at5g49070
				at1g59930	at5g50310
				at1g59990	at5g51980
				at1g60150	at5g52050
				at1g60200	at5g52150
				at1g60340	at5g53120
				at1g60440	at5g53450
				at1g60505	at5g54440
				at1g60525	at5g54610
				at1g60530	at5g55010
				at1g60545	at5g55070
				at1g60650	at5g55460
				at1g60690	at5g56250
				at1g60770	at5g56380
				at1g60850	at5g57480
				at1g60870	at5g57940
				at1g60985	at5g58160
				at1g61010	at5g59280
				at1g61040	at5g60280
				at1g61210	at5g62970
				at1g61230
				at1g61415
				at1g61450
				at1g61820
				at1g61860
				at1g61960
				at1g62040
				at1g62160
				at1g62190
				at1g62262
				at1g62270
				at1g62305
				at1g62350
				at1g62355
				at1g62430
				at1g62550
				at1g62630
				at1g62700
				at1g62800
				at1g62900
				at1g63010
				at1g63110
				at1g63120
				at1g63210
				at1g63300
				at1g63330
				at1g63680
				at1g63690
				at1g63770
				at1g63990
				at1g64000
				at1g64100
				at1g64110
				at1g64180
				at1g64250
				at1g64300
				at1g64330
				at1g64340
				at1g64370
				at1g64410
				at1g64520
				at1g64790
				at1g64980
				at1g65090
				at1g65140
				at1g65240
				at1g65260
				at1g65346
				at1g65380
				at1g65390
				at1g65450
				at1g65550
				at1g65580
				at1g65681
				at1g65960
				at1g65985
				at1g66040
				at1g66050
				at1g66090
				at1g66120
				at1g66173
				at1g66260
				at1g66290
				at1g66440
				at1g66450
				at1g66540
				at1g66610
				at1g66740
				at1g66750
				at1g66780
				at1g66783
				at1g66790
				at1g66900
				at1g66960
				at1g66970
				at1g67025
				at1g67080
				at1g67210
				at1g67240
				at1g67270
				at1g67280
				at1g67410
				at1g67450
				at1g67480
				at1g67626
				at1g67650
				at1g67670
				at1g67730
				at1g67820
				at1g67875
				at1g67930
				at1g67970
				at1g67990
				at1g68030
				at1g68060
				at1g68070
				at1g68210
				at1g68250
				at1g68700
				at1g68710
				at1g68780
				at1g68890
				at1g68905
				at1g68910
				at1g69150
				at1g69250
				at1g69310
				at1g69350
				at1g69390
				at1g69420
				at1g69510
				at1g69570
				at1g69572
				at1g69640
				at1g69650
				at1g69750
				at1g69770
				at1g70060
				at1g70080
				at1g70110
				at1g70380
				at1g70410
				at1g70430
				at1g70490
				at1g70590
				at1g70630
				at1g70650
				at1g70830
				at1g70960
				at1g70970
				at1g71010
				at1g71070
				at1g71090
				at1g71270
				at1g71320
				at1g71350
				at1g71692
				at1g71697
				at1g71700
				at1g71830
				at1g71930
				at1g71980
				at1g72080
				at1g72090
				at1g72260
				at1g72280
				at1g72300
				at1g72340
				at1g72590
				at1g72640
				at1g72700
				at1g72760
				at1g72770
				at1g72990
				at1g73030
				at1g73040
				at1g73370
				at1g73410
				at1g73470
				at1g73490
				at1g73600
				at1g73602
				at1g73670
				at1g73730
				at1g74160
				at1g74180
				at1g74240
				at1g74250
				at1g74310
				at1g74360
				at1g74410
				at1g74530
				at1g74630
				at1g74680
				at1g74740
				at1g75330
				at1g75670
				at1g75700
				at1g75730
				at1g75760
				at1g75920
				at1g76010
				at1g76050
				at1g76140
				at1g76150
				at1g76200
				at1g76260
				at1g76280
				at1g76310
				at1g76380
				at1g76550
				at1g76720
				at1g77000
				at1g77095
				at1g77270
				at1g77310
				at1g77350
				at1g77530
				at1g77590
				at1g77770
				at1g77810
				at1g77820
				at1g77850
				at1g77890
				at1g77920
				at1g77960
				at1g77980
				at1g78050
				at1g78510
				at1g78550
				at1g78610
				at1g78790
				at1g78915
				at1g79030
				at1g79150
				at1g79190
				at1g79440
				at1g79460
				at1g79529
				at1g79530
				at1g79610
				at1g79620
				at1g79640
				at1g79730
				at1g80150
				at1g80190
				at1g80300
				at1g80370
				at1g80490
				at1g80720
				at1g80810
				at1g80880
				at1g80910
				at2g01130
				at2g01280
				at2g01630
				at2g01660
				at2g01720
				at2g01760
				at2g01790
				at2g01800
				at2g01830
				at2g01880
				at2g01900
				at2g01905
				at2g01920
				at2g01960
				at2g01990
				at2g02148
				at2g02160
				at2g02250
				at2g02340
				at2g02370
				at2g02380
				at2g02470
				at2g02498
				at2g02780
				at2g02790
				at2g02795
				at2g02800
				at2g02810
				at2g02830
				at2g02980
				at2g03180
				at2g03240
				at2g03260
				at2g03270
				at2g03750
				at2g03810
				at2g03821
				at2g03822
				at2g03860
				at2g03955
				at2g03970
				at2g03980
				at2g04039
				at2g04140
				at2g04160
				at2g04180
				at2g04280
				at2g04290
				at2g04300
				at2g04390
				at2g04530
				at2g04540
				at2g04600
				at2g04630
				at2g04690
				at2g04970
				at2g05390
				at2g05845
				at2g05995
				at2g06000
				at2g06020
				at2g06950
				at2g07050
				at2g07674
				at2g07681
				at2g07696
				at2g07706
				at2g07707
				at2g07708
				at2g07743
				at2g07749
				at2g07773
				at2g07787
				at2g07815
				at2g11005
				at2g11235
				at2g11290
				at2g13125
				at2g13250
				at2g13370
				at2g13690
				at2g13810
				at2g13820
				at2g13970
				at2g14080
				at2g14210
				at2g14220
				at2g14230
				at2g14245
				at2g14300
				at2g14470
				at2g14520
				at2g14670
				at2g14700
				at2g14820
				at2g15160
				at2g15230
				at2g15290
				at2g15350
				at2g15480
				at2g15560
				at2g15620
				at2g15770
				at2g15820
				at2g16365
				at2g16390
				at2g16400
				at2g16485
				at2g16500
				at2g16595
				at2g16630
				at2g16650
				at2g16710
				at2g16750
				at2g16960
				at2g16970
				at2g17360
				at2g17440
				at2g17520
				at2g17530
				at2g17550
				at2g17610
				at2g17800
				at2g17820
				at2g17840
				at2g18030
				at2g18060
				at2g18070
				at2g18130
				at2g18180
				at2g18250
				at2g18750
				at2g18915
				at2g18950
				at2g19000
				at2g19140
				at2g19290
				at2g19520
				at2g19806
				at2g20000
				at2g20050
				at2g20610
				at2g20630
				at2g20805
				at2g20900
				at2g21100
				at2g21150
				at2g21350
				at2g21380
				at2g21450
				at2g21600
				at2g21720
				at2g21790
				at2g21920
				at2g21930
				at2g21940
				at2g22120
				at2g22270
				at2g22290
				at2g22530
				at2g22600
				at2g22630
				at2g22795
				at2g22805
				at2g22830
				at2g22960
				at2g22990
				at2g23080
				at2g23090
				at2g23142
				at2g23190
				at2g23310
				at2g23420
				at2g23540
				at2g23660
				at2g23920
				at2g24050
				at2g24140
				at2g24330
				at2g24390
				at2g24560
				at2g24615
				at2g24640
				at2g24650
				at2g24660
				at2g24690
				at2g24700
				at2g24765
				at2g24870
				at2g24960
				at2g24970
				at2g25050
				at2g25080
				at2g25270
				at2g25290
				at2g25330
				at2g25355
				at2g25430
				at2g25490
				at2g25500
				at2g25540
				at2g25690
				at2g25737
				at2g25760
				at2g26080
				at2g26120
				at2g26280
				at2g26320
				at2g26390
				at2g26420
				at2g26510
				at2g26540
				at2g26590
				at2g26610
				at2g26620
				at2g26650
				at2g26830
				at2g26850
				at2g26910
				at2g26920
				at2g27010
				at2g27070
				at2g27320
				at2g27360
				at2g27380
				at2g27450
				at2g27730
				at2g27740
				at2g27760
				at2g27810
				at2g27860
				at2g27880
				at2g27920
				at2g27950
				at2g28020
				at2g28085
				at2g28100
				at2g28130
				at2g28260
				at2g28290
				at2g28320
				at2g28360
				at2g28380
				at2g28550
				at2g28620
				at2g28900
				at2g28990
				at2g29140
				at2g29240
				at2g29400
				at2g29410
				at2g29510
				at2g29600
				at2g29650
				at2g29680
				at2g29710
				at2g29720
				at2g29880
				at2g29920
				at2g29970
				at2g30110
				at2g30250
				at2g30290
				at2g30350
				at2g30460
				at2g30505
				at2g30560
				at2g30615
				at2g30710
				at2g30730
				at2g30770
				at2g30820
				at2g30910
				at2g30950
				at2g30990
				at2g31020
				at2g31030
				at2g31060
				at2g31081
				at2g31130
				at2g31470
				at2g31600
				at2g31650
				at2g31680
				at2g31700
				at2g31810
				at2g31840
				at2g31865
				at2g31930
				at2g32010
				at2g32290
				at2g32320
				at2g32415
				at2g32580
				at2g32900
				at2g33030
				at2g33080
				at2g33110
				at2g33205
				at2g33220
				at2g33290
				at2g33340
				at2g33380
				at2g33560
				at2g33640
				at2g33845
				at2g33847
				at2g33980
				at2g34180
				at2g34370
				at2g34460
				at2g34470
				at2g34530
				at2g34590
				at2g34720
				at2g34750
				at2g34835
				at2g34860
				at2g35075
				at2g35170
				at2g35250
				at2g35620
				at2g35738
				at2g35740
				at2g36110
				at2g36180
				at2g36350
				at2g36370
				at2g36450
				at2g36500
				at2g36710
				at2g36900
				at2g36930
				at2g36980
				at2g37010
				at2g37020
				at2g37150
				at2g37230
				at2g37280
				at2g37370
				at2g37510
				at2g37680
				at2g37700
				at2g37810
				at2g38220
				at2g38300
				at2g38370
				at2g38590
				at2g38720
				at2g38880
				at2g39080
				at2g39110
				at2g39170
				at2g39445
				at2g39675
				at2g39681
				at2g39800
				at2g39805
				at2g39830
				at2g39840
				at2g39850
				at2g39940
				at2g39960
				at2g40070
				at2g40440
				at2g40570
				at2g40660
				at2g40770
				at2g40780
				at2g40820
				at2g40840
				at2g40930
				at2g40935
				at2g40950
				at2g41140
				at2g41250
				at2g41630
				at2g41700
				at2g41710
				at2g41745
				at2g41760
				at2g41770
				at2g42070
				at2g42120
				at2g42130
				at2g42190
				at2g42260
				at2g42460
				at2g42660
				at2g42670
				at2g42720
				at2g42750
				at2g43050
				at2g43070
				at2g43140
				at2g43330
				at2g43420
				at2g43465
				at2g43500
				at2g43810
				at2g43865
				at2g43900
				at2g44065
				at2g44090
				at2g44160
				at2g44220
				at2g44255
				at2g44260
				at2g44280
				at2g44350
				at2g44460
				at2g44470
				at2g44480
				at2g44560
				at2g44570
				at2g44650
				at2g44660
				at2g44760
				at2g44770
				at2g44860
				at2g44925
				at2g45140
				at2g45250
				at2g45690
				at2g45740
				at2g45770
				at2g45990
				at2g46000
				at2g46040
				at2g46240
				at2g46290
				at2g46340
				at2g46460
				at2g46510
				at2g46570
				at2g46572
				at2g46710
				at2g46830
				at2g46860
				at2g46900
				at2g46960
				at2g46980
				at2g47060
				at2g47170
				at2g47310
				at2g47500
				at2g47700
				at2g47760
				at2g47850
				at2g48070
				at2g48075
				at3g01160
				at3g01280
				at3g01300
				at3g01350
				at3g01360
				at3g01410
				at3g01435
				at3g01640
				at3g01770
				at3g02070
				at3g02370
				at3g02420
				at3g02570
				at3g02590
				at3g02610
				at3g02800
				at3g02830
				at3g02930
				at3g02940
				at3g03010
				at3g03050
				at3g03060
				at3g03300
				at3g03360
				at3g03370
				at3g03610
				at3g03620
				at3g03900
				at3g04100
				at3g04240
				at3g04250
				at3g04350
				at3g04490
				at3g04580
				at3g04605
				at3g04630
				at3g04780
				at3g05040
				at3g05050
				at3g05070
				at3g05310
				at3g05330
				at3g05400
				at3g05410
				at3g05420
				at3g05470
				at3g05545
				at3g05570
				at3g05670
				at3g05725
				at3g05740
				at3g05750
				at3g05770
				at3g05790
				at3g05810
				at3g05910
				at3g05930
				at3g05932
				at3g05940
				at3g05970
				at3g06030
				at3g06040
				at3g06050
				at3g06140
				at3g06180
				at3g06230
				at3g06250
				at3g06340
				at3g06440
				at3g06480
				at3g06560
				at3g06600
				at3g06630
				at3g06660
				at3g06710
				at3g06730
				at3g06940
				at3g07040
				at3g07140
				at3g07180
				at3g07370
				at3g07380
				at3g07560
				at3g07640
				at3g07680
				at3g07690
				at3g07730
				at3g07740
				at3g07770
				at3g07880
				at3g07960
				at3g08505
				at3g08670
				at3g08740
				at3g08850
				at3g08980
				at3g09000
				at3g09010
				at3g09110
				at3g09210
				at3g09320
				at3g09350
				at3g09405
				at3g09470
				at3g09510
				at3g09720
				at3g09760
				at3g09810
				at3g09960
				at3g10070
				at3g10140
				at3g10380
				at3g10440
				at3g10450
				at3g10470
				at3g10630
				at3g10640
				at3g10670
				at3g10820
				at3g10840
				at3g10890
				at3g10915
				at3g10920
				at3g10986
				at3g11010
				at3g11020
				at3g11030
				at3g11040
				at3g11070
				at3g11170
				at3g11200
				at3g11270
				at3g11310
				at3g11350
				at3g11397
				at3g11402
				at3g11510
				at3g11520
				at3g11530
				at3g11540
				at3g11680
				at3g11730
				at3g11770
				at3g11880
				at3g11920
				at3g11970
				at3g11990
				at3g12120
				at3g12145
				at3g12170
				at3g12200
				at3g12220
				at3g12240
				at3g12300
				at3g12480
				at3g12550
				at3g12560
				at3g12770
				at3g12950
				at3g12980
				at3g13062
				at3g13080
				at3g13120
				at3g13200
				at3g13230
				at3g13235
				at3g13250
				at3g13330
				at3g13450
				at3g13460
				at3g13510
				at3g13662
				at3g13700
				at3g13710
				at3g13772
				at3g13870
				at3g13900
				at3g13930
				at3g14000
				at3g14010
				at3g14050
				at3g14075
				at3g14120
				at3g14130
				at3g14360
				at3g14520
				at3g14680
				at3g14840
				at3g14860
				at3g14900
				at3g14930
				at3g14950
				at3g15000
				at3g15010
				at3g15020
				at3g15150
				at3g15160
				at3g15260
				at3g15290
				at3g15340
				at3g15400
				at3g15410
				at3g15480
				at3g15750
				at3g15950
				at3g16060
				at3g16090
				at3g16310
				at3g16320
				at3g16340
				at3g16350
				at3g16480
				at3g16565
				at3g16620
				at3g16785
				at3g16810
				at3g16840
				at3g16850
				at3g17000
				at3g17040
				at3g17050
				at3g17090
				at3g17365
				at3g17380
				at3g17410
				at3g17465
				at3g17500
				at3g17530
				at3g17540
				at3g17590
				at3g17620
				at3g17900
				at3g17920
				at3g18040
				at3g18070
				at3g18140
				at3g18160
				at3g18200
				at3g18460
				at3g18520
				at3g18620
				at3g18680
				at3g18730
				at3g18750
				at3g18990
				at3g19045
				at3g19170
				at3g19190
				at3g19260
				at3g19290
				at3g19330
				at3g19420
				at3g19450
				at3g19460
				at3g19540
				at3g19620
				at3g19640
				at3g19780
				at3g19790
				at3g19840
				at3g19890
				at3g19930
				at3g19960
				at3g20000
				at3g20030
				at3g20130
				at3g20150
				at3g20300
				at3g20410
				at3g20480
				at3g20550
				at3g20560
				at3g20690
				at3g20700
				at3g20710
				at3g20740
				at3g20860
				at3g20890
				at3g20960
				at3g21080
				at3g21160
				at3g21170
				at3g21180
				at3g21200
				at3g21230
				at3g21430
				at3g21500
				at3g21540
				at3g21570
				at3g21590
				at3g21820
				at3g21940
				at3g21960
				at3g21990
				at3g22030
				at3g22050
				at3g22057
				at3g22190
				at3g22200
				at3g22235
				at3g22350
				at3g22380
				at3g22421
				at3g22590
				at3g22630
				at3g22710
				at3g22810
				at3g22955
				at3g22980
				at3g23040
				at3g23220
				at3g23330
				at3g23470
				at3g23633
				at3g23650
				at3g23670
				at3g23680
				at3g23710
				at3g23810
				at3g23850
				at3g23870
				at3g23900
				at3g23950
				at3g23980
				at3g23990
				at3g24180
				at3g24270
				at3g24350
				at3g24460
				at3g24465
				at3g24542
				at3g24590
				at3g24660
				at3g24670
				at3g24715
				at3g24730
				at3g24760
				at3g24840
				at3g24870
				at3g24880
				at3g25060
				at3g25090
				at3g25120
				at3g25130
				at3g25160
				at3g25460
				at3g25490
				at3g25510
				at3g25570
				at3g25572
				at3g25585
				at3g25630
				at3g25727
				at3g25840
				at3g25850
				at3g25855
				at3g25990
				at3g26000
				at3g26040
				at3g26070
				at3g26115
				at3g26140
				at3g26250
				at3g26280
				at3g26370
				at3g26500
				at3g26560
				at3g26747
				at3g26782
				at3g26850
				at3g26900
				at3g26934
				at3g26990
				at3g27000
				at3g27020
				at3g27025
				at3g27050
				at3g27210
				at3g27250
				at3g27310
				at3g27380
				at3g27400
				at3g27410
				at3g27560
				at3g27680
				at3g27730
				at3g27950
				at3g27960
				at3g28005
				at3g28080
				at3g28100
				at3g28150
				at3g28220
				at3g28260
				at3g28315
				at3g28345
				at3g28460
				at3g28490
				at3g28520
				at3g28550
				at3g28670
				at3g28780
				at3g28855
				at3g28915
				at3g28925
				at3g28945
				at3g28956
				at3g29033
				at3g29090
				at3g29110
				at3g29160
				at3g29185
				at3g29190
				at3g29410
				at3g29515
				at3g29577
				at3g29636
				at3g29642
				at3g29644
				at3g29755
				at3g29820
				at3g30200
				at3g30290
				at3g30380
				at3g30510
				at3g30724
				at3g30803
				at3g30841
				at3g31422
				at3g31630
				at3g32030
				at3g32373
				at3g33528
				at3g33595
				at3g42148
				at3g42180
				at3g42680
				at3g42820
				at3g42835
				at3g42870
				at3g42875
				at3g42922
				at3g42950
				at3g43005
				at3g43100
				at3g43205
				at3g43220
				at3g43402
				at3g43420
				at3g43425
				at3g43444
				at3g43520
				at3g43546
				at3g43760
				at3g43770
				at3g43840
				at3g43860
				at3g43920
				at3g43930
				at3g43970
				at3g44035
				at3g44090
				at3g44130
				at3g44140
				at3g44160
				at3g44171
				at3g44310
				at3g44320
				at3g44325
				at3g44340
				at3g44370
				at3g44540
				at3g44560
				at3g44820
				at3g44850
				at3g44880
				at3g44910
				at3g45310
				at3g45410
				at3g45443
				at3g45640
				at3g45800
				at3g45840
				at3g45850
				at3g45890
				at3g45910
				at3g45940
				at3g46040
				at3g46120
				at3g46206
				at3g46210
				at3g46220
				at3g46340
				at3g46350
				at3g46820
				at3g46910
				at3g46920
				at3g46980
				at3g47080
				at3g47160
				at3g47190
				at3g47230
				at3g47290
				at3g47400
				at3g47460
				at3g47550
				at3g47570
				at3g47580
				at3g47590
				at3g47610
				at3g47740
				at3g47770
				at3g47780
				at3g47833
				at3g47940
				at3g48057
				at3g48230
				at3g48235
				at3g48540
				at3g48560
				at3g48630
				at3g48670
				at3g48720
				at3g48730
				at3g48760
				at3g48780
				at3g48790
				at3g48820
				at3g48900
				at3g49010
				at3g49070
				at3g49230
				at3g49240
				at3g49250
				at3g49310
				at3g49350
				at3g49400
				at3g49410
				at3g49480
				at3g49510
				at3g49520
				at3g49600
				at3g49725
				at3g49730
				at3g49870
				at3g49920
				at3g50040
				at3g50050
				at3g50120
				at3g50230
				at3g50360
				at3g50380
				at3g50674
				at3g50790
				at3g51050
				at3g51100
				at3g51150
				at3g51180
				at3g51260
				at3g51290
				at3g51300
				at3g51325
				at3g51390
				at3g51560
				at3g51700
				at3g51830
				at3g51840
				at3g52030
				at3g52040
				at3g52190
				at3g52200
				at3g52300
				at3g52310
				at3g52640
				at3g52680
				at3g52700
				at3g52750
				at3g52780
				at3g52830
				at3g52850
				at3g52870
				at3g53000
				at3g53030
				at3g53065
				at3g53290
				at3g53300
				at3g53400
				at3g53402
				at3g53480
				at3g53510
				at3g53520
				at3g53540
				at3g53580
				at3g53630
				at3g53760
				at3g53780
				at3g53810
				at3g54130
				at3g54170
				at3g54240
				at3g54250
[truncated: 1,429 more rows]

## Sheet: AllDMR AT IDs-3stresses
PSR DMRs	SA	glyphosate
AT4G16900	AT1G01350	AT4G00970
AT1G67520	AT1G01750	AT2G48070
AT5G41750	AT1G02210	AT2G48075
AT4G13690	AT1G03905	AT1G28323
AT4G37710	AT1G04080	AT1G24764
AT3G23450	AT1G04790	AT3G24542
AT5G26270	AT1G06580	AT3G10470
AT1G58280	AT1G06900	AT1G77960
AT2G18530	AT1G07880	AT1G43650
AT5G37840	AT1G08590	AT3G09000
AT4G20460	AT1G08860	AT5G63620
AT2G38823	AT1G08940	AT5G49050
AT1G21940	AT1G09160	AT5G39910
AT1G61480	AT1G11160	AT3G21590
AT4G23000	AT1G11310	AT3G27950
AT1G63750	AT1G12990	AT5G10740
AT5G26280	AT1G13340	AT5G05500
AT4G09780	AT1G13470	AT5G05510
AT1G67000	AT1G14370	AT3G53300
AT1G68850	AT1G15940	AT2G27740
AT5G20790	AT1G16090	AT5G37980
AT1G54095	AT1G16250	AT4G12000
AT5G39110	AT1G16650	AT3G57430
AT1G26250	AT1G16780	AT1G55940
AT4G04990	AT1G17400	AT1G07220
AT4G14090	AT1G17450	AT3G50790
AT3G17190	AT1G17600	AT3G09320
AT4G15270	AT1G18660	AT4G33790
AT3G04050	AT1G18870	AT5G46410
AT3G59570	AT1G19100	AT3G02370
AT5G24200	AT1G19394	AT5G03880
AT4G03140	AT1G20400	AT3G20890
AT2G07698	AT1G21450	AT4G01820
AT1G45015	AT1G22060	AT1G80810
AT5G41280	AT1G24220	AT2G20630
AT2G43880	AT1G24380	AT3G48120
AT4G10260	AT1G24530	AT1G01090
AT4G15990	AT1G26420	AT1G67930
AT2G41730	AT1G27470	AT1G32500
AT5G42930	AT1G28307	AT3G24180
AT1G20390	AT1G28370	AT5G14450
AT2G12200	AT1G28480	AT3G14930
AT3G45330	AT1G29080	AT4G17510
AT1G26240	AT1G29640	AT1G74360
AT2G07671	AT1G29724	AT1G34650
AT2G15780	AT1G30650	AT3G62770
AT2G04100	AT1G30790	AT2G34860
AT2G15220	AT1G30890	AT1G26540
AT1G64610	AT1G32000	AT1G05910
AT5G27845	AT1G32375	AT4G10800
AT2G20560	AT1G32380	AT1G16070
AT1G32970	AT1G32730	AT5G36223
AT1G71140	AT1G32850	AT4G39890
AT2G34210	AT1G33500	AT2G07708
AT1G69790	AT1G33730	AT3G22710
AT3G14205	AT1G33960	AT1G56430
AT5G07570	AT1G34310	AT1G17150
AT5G57610	AT1G34440	AT3G50380
AT1G61610	AT1G34470	AT2G47500
AT3G43110	AT1G35030	AT4G08750
AT2G05580	AT1G35040	AT2G44100
AT1G66360	AT1G35140	AT4G20095
AT3G45720	AT1G35210	AT4G24810
AT2G02720	AT1G35230	AT3G63180
AT5G38910	AT1G35240	AT5G20360
AT5G67340	AT1G35242	AT2G36350
AT5G52710	AT1G35260	AT1G14688
AT4G10060	AT1G35310	AT1G22760
AT1G57630	AT1G35350	AT1G54510
AT1G72890	AT1G35365	AT3G27025
AT4G39210	AT1G35435	AT1G17890
AT1G12240	AT1G35630	AT5G51590
AT1G32200	AT1G35710	AT1G40118
AT3G28210	AT1G35820	AT5G41700
AT1G32960	AT1G35900	AT4G28000
AT4G12120	AT1G36000	AT5G62640
AT1G68050	AT1G36030	AT2G45990
AT1G72330	AT1G36095	AT2G46000
AT4G08870	AT1G36150	AT2G22530
AT1G02520	AT1G36160	AT4G13310
AT2G47000	AT1G36272	AT3G59570
AT2G29940	AT1G36310	AT1G55750
AT2G46530	AT1G36340	AT5G21080
AT3G28930	AT1G36390	AT1G28960
AT2G14580	AT1G36622	AT4G35620
AT3G03640	AT1G36675	AT3G04250
AT1G67980	AT1G36920	AT5G47210
AT1G79400	AT1G36925	AT4G34180
AT1G47960	AT1G36980	AT1G77590
AT4G23600	AT1G37000	AT1G67626
AT3G21520	AT1G38950	AT1G27170
AT1G54040	AT1G40083	AT2G19806
AT1G62540	AT1G41820	AT5G24950
AT1G62560	AT1G42190	AT1G67970
AT5G14780	AT1G42470	AT1G32585
AT4G39640	AT1G42710	AT1G60505
AT2G32400	AT1G42970	AT4G14630
AT1G74590	AT1G43040	AT3G63280
AT3G09270	AT1G43080	AT1G08920
AT1G30560	AT1G43190	AT4G16520
AT2G05520	AT1G43310	AT1G70110
AT2G26150	AT1G43415	AT1G17970
AT2G34600	AT1G43580	AT5G53510
AT1G55020	AT1G43630	AT4G31100
AT5G27600	AT1G43650	AT1G68060
AT3G14720	AT1G43665	AT3G16810
AT1G54030	AT1G43730	AT5G65770
AT2G11810	AT1G43790	AT5G65780
AT4G37670	AT1G43810	AT5G39440
AT1G01010	AT1G43910	AT2G15160
AT1G62580	AT1G44080	AT5G26740
AT5G22300	AT1G44100	AT3G10915
AT1G06160	AT1G44170	AT1G59520
AT1G20860	AT1G44740	AT5G03520
AT2G22860	AT1G44910	AT1G18900
AT2G05620	AT1G45015	AT3G29160
AT2G16430	AT1G45063	AT1G06110
AT3G09910	AT1G46696	AT3G09350
AT1G07390	AT1G46912	AT5G13290
AT1G11720	AT1G47370	AT2G01760
AT5G20280	AT1G47400	AT1G62700
AT3G54670	AT1G47840	AT2G47700
AT4G01470	AT1G47885	AT2G44350
AT3G11570	AT1G47960	AT3G53000
AT1G30530	AT1G48390	AT5G54730
AT4G25960	AT1G48600	AT1G30550
AT2G04460	AT1G48690	AT3G56100
AT1G68440	AT1G49050	AT2G17820
AT2G35920	AT1G49260	AT1G10390
AT4G03380	AT1G49300	AT1G54470
AT2G15980	AT1G49710	AT3G28956
AT3G53360	AT1G50870	AT3G17090
AT3G27870	AT1G51620	AT1G06510
AT3G45070	AT1G51830	AT3G18620
AT1G43140	AT1G52360	AT5G02390
AT1G12730	AT1G52500	AT4G23470
AT4G03100	AT1G52890	AT5G41060
AT5G14120	AT1G52905	AT5G58740
AT3G55160	AT1G53850	AT2G42720
AT5G18030	AT1G54310	AT1G09420
AT2G17525	AT1G55020	AT3G54960
AT1G72180	AT1G55610	AT3G52700
AT1G21630	AT1G56670	AT4G35240
AT5G46460	AT1G58007	AT5G57490
AT3G46240	AT1G58430	AT2G42260
AT1G29450	AT1G58602	AT1G12160
AT1G50180	AT1G59500	AT1G72090
AT2G34100	AT1G59660	AT4G22220
AT1G57770	AT1G59865	AT1G27110
AT2G10560	AT1G60740	AT4G26160
AT5G26730	AT1G60995	AT3G49410
AT3G51870	AT1G61360	AT1G57570
AT3G28690	AT1G61380	AT1G17240
AT1G17600	AT1G61420	AT3G47610
AT1G19720	AT1G61850	AT1G51745
AT2G07676	AT1G62225	AT5G13940
AT3G09162	AT1G62760	AT1G48900
AT4G34730	AT1G62790	AT1G11070
AT4G00910	AT1G63290	AT3G19620
AT2G07687	AT1G63410	AT1G20200
AT1G63540	AT1G63480	AT4G34640
AT2G17930	AT1G64260	AT3G57290
AT5G15780	AT1G65350	AT5G39862
AT5G41780	AT1G65486	AT1G69650
AT5G66520	AT1G65950	AT1G49510
AT2G22070	AT1G66070	AT3G13700
AT1G16800	AT1G66235	AT3G13710
AT3G47110	AT1G66300	AT1G16858
AT3G46490	AT1G66310	AT1G16860
AT3G18840	AT1G66320	AT1G77850
AT1G03540	AT1G66640	AT4G11910
AT1G79710	AT1G66880	AT5G47300
AT3G05340	AT1G66890	AT3G12550
AT2G07675	AT1G66920	AT3G46980
AT2G07722	AT1G67000	AT3G09470
AT4G08290	AT1G67130	AT3G21820
AT5G10340	AT1G67290	AT1G65985
AT4G17140	AT1G67350	AT5G62570
AT1G24160	AT1G67520	AT1G68780
AT1G53800	AT1G67540	AT3G61350
AT1G74580	AT1G67623	AT3G10630
AT2G05790	AT1G67890	AT1G22950
AT2G07751	AT1G68640	AT2G44090
AT5G24350	AT1G69090	AT3G09510
AT5G37130	AT1G69960	AT5G27530
AT4G16920	AT1G70070	AT3G21430
AT2G07682	AT1G70790	AT1G62262
AT3G44755	AT1G72930	AT3G27380
AT2G07777	AT1G73180	AT5G54590
AT4G31210	AT1G73960	AT3G46820
AT1G73710	AT1G76660	AT5G47140
AT4G19530	AT1G77680	AT3G62725
AT2G19660	AT1G78130	AT3G49240
AT2G07721	AT1G79500	AT3G58930
AT1G47400	AT1G79560	AT3G59660
AT4G22460	AT1G80070	AT3G60790
AT1G34047	AT1G80280	AT1G02750
AT1G49990	AT1G80530	AT2G16960
AT5G20610	AT2G01021	AT2G40780
AT1G36240	AT2G01023	AT2G42190
AT3G14730	AT2G01310	AT4G02005
AT1G67120	AT2G01580	AT1G21835
AT3G54770	AT2G01600	AT4G16130
AT5G14880	AT2G01680	AT3G51180
AT5G14020	AT2G01870	AT3G44540
AT2G30600	AT2G02030	AT4G08395
AT1G22060	AT2G02490	AT4G10925
AT4G20430	AT2G02520	AT4G34490
AT4G36470	AT2G02955	AT5G35160
AT5G44410	AT2G03250	AT3G25585
AT5G45230	AT2G03330	AT1G16760
AT2G25730	AT2G03670	AT5G59660
AT3G14460	AT2G03840	AT3G52300
AT3G11964	AT2G03913	AT1G66260
AT2G05540	AT2G04020	AT5G16540
AT3G06530	AT2G04063	AT4G34370
AT3G48420	AT2G04100	AT4G34230
AT2G34290	AT2G04305	AT2G44760
AT3G09080	AT2G04495	AT5G59200
AT4G20362	AT2G04500	AT5G05310
AT4G05631	AT2G04740	AT3G19930
AT5G59650	AT2G04795	AT3G60920
AT3G54580	AT2G04940	AT3G58100
AT2G04795	AT2G05120	AT5G40060
AT4G36140	AT2G05210	AT5G27430
AT2G14760	AT2G05350	AT5G09850
AT5G06670	AT2G05370	AT5G12120
AT2G07673	AT2G05380	AT3G17620
AT2G15900	AT2G05420	AT4G39690
AT1G44835	AT2G05440	AT3G52200
AT4G19980	AT2G05540	AT5G02502
AT5G05400	AT2G05580	AT5G07380
AT1G44030	AT2G05760	AT5G03905
AT2G25900	AT2G05920	AT3G62220
AT2G01910	AT2G06005	AT4G26930
AT4G17460	AT2G06050	AT5G60170
AT2G28250	AT2G06255	AT3G14130
AT2G02120	AT2G06500	AT5G47720
AT1G24706	AT2G06541	AT5G56950
AT4G18600	AT2G06908	AT2G36110
AT5G06905	AT2G06925	AT2G31930
AT2G25160	AT2G07000	AT3G02070
AT5G28840	AT2G07040	AT1G67890
AT3G47930	AT2G07170	AT1G09220
AT2G13540	AT2G07310	AT3G51390
AT3G49290	AT2G07440	AT1G55050
AT1G80070	AT2G07521	AT2G17787
AT2G14170	AT2G07560	AT3G56660
AT1G20650	AT2G07768	AT1G73410
AT1G08430	AT2G07689	AT1G22882
AT4G26320	AT2G07715	AT1G12850
AT1G64950	AT2G07724	AT5G61200
AT3G21090	AT2G07732	AT1G50590
AT4G21760	AT2G07734	AT4G10310
AT3G02260	AT2G07827	AT4G10590
AT2G01950	AT2G07738	AT3G20860
AT3G18290	AT2G07739	AT4G05520
AT4G37610	AT2G07680	AT5G63040
AT1G06490	AT2G07750	AT1G32700
AT4G35090	AT2G09388	AT1G47710
AT2G22125	AT2G09838	AT1G17750
AT4G00450	AT2G09970	AT4G25310
AT3G27170	AT2G10020	AT4G18220
AT5G57180	AT2G10440	AT1G80880
AT2G18760	AT2G10560	AT1G61860
AT4G09680	AT2G10940	AT4G21065
AT5G45380	AT2G10965	AT1G56610
AT1G48300	AT2G11271	AT1G47270
AT1G01040	AT2G11520	AT3G27050
AT5G37630	AT2G11810	AT5G60820
AT5G13010	AT2G11890	AT1G35690
AT5G06640	AT2G12200	AT1G06500
AT2G24980	AT2G12290	AT5G39720
AT4G27030	AT2G12405	AT5G55590
AT5G46330	AT2G12465	AT2G46510
AT3G14270	AT2G12557	AT5G17260
AT5G47820	AT2G12875	AT5G03470
AT4G09600	AT2G12905	AT4G33540
AT3G60530	AT2G12940	AT5G08620
AT3G07160	AT2G12945	AT2G03140
AT2G31960	AT2G13100	AT3G59200
AT3G47340	AT2G13272	AT3G06180
AT3G42640	AT2G13500	AT2G31130
AT4G30110	AT2G13770	AT2G02250
AT1G71920	AT2G13790	AT4G06701
AT1G16710	AT2G13950	AT1G64300
AT5G13530	AT2G13960	AT5G39250
AT4G18120	AT2G14060	AT5G20080
AT2G17780	AT2G14110	AT2G39940
AT4G08480	AT2G14160	AT3G45443
AT2G16640	AT2G14365	AT3G59180
AT5G54280	AT2G14440	AT4G24450
AT4G37590	AT2G14560	AT4G35310
AT4G14760	AT2G14580	AT3G18460
AT4G02710	AT2G14610	AT2G29680
AT5G04950	AT2G14660	AT1G69770
AT1G32450	AT2G14720	AT3G15480
AT1G08090	AT2G15042	AT1G15860
AT1G60800	AT2G15110	AT1G53760
AT4G32850	AT2G15130	AT4G02580
AT1G79280	AT2G15300	AT1G69150
AT4G16370	AT2G15440	AT4G39500
AT1G34355	AT2G15535	AT1G22580
AT5G01180	AT2G15630	AT3G48630
AT5G04230	AT2G15790	AT5G56970
AT1G32060	AT2G16015	AT3G47570
AT5G52920	AT2G16030	AT3G06480
AT2G01918	AT2G16190	AT1G60525
AT1G74260	AT2G16668	AT1G60530
AT4G30710	AT2G17305	AT4G14240
AT1G67500	AT2G17787	AT3G51290
AT1G67710	AT2G17890	AT3G51300
AT3G27670	AT2G18520	AT5G66630
AT3G10710	AT2G18690	AT5G10030
AT2G39730	AT2G19090	AT5G10040
AT1G02500	AT2G19960	AT1G79530
AT2G38440	AT2G20010	AT1G62350
AT3G26030	AT2G20613	AT1G62355
AT4G15180	AT2G20820	AT1G01440
AT5G42400	AT2G21040	AT3G61400
AT1G62280	AT2G21270	AT5G39410
AT4G16340	AT2G22490	AT4G11080
AT3G13065	AT2G22890	AT2G37010
AT1G20840	AT2G22970	AT4G22290
AT5G63920	AT2G23200	AT3G13510
AT1G70290	AT2G23390	AT4G13640
AT5G01360	AT2G24120	AT3G10640
AT1G55860	AT2G24720	AT2G18915
AT5G40850	AT2G24990	AT1G33970
AT4G07400	AT2G25370	AT1G15880
AT1G16160	AT2G25410	AT4G34140
AT3G06290	AT2G25800	AT3G47780
AT5G13740	AT2G26140	AT3G59990
AT5G45105	AT2G26215	AT5G10810
AT1G36622	AT2G26260	AT5G13820
AT5G02180	AT2G26600	AT1G70590
AT2G45920	AT2G27610	AT4G25070
AT2G18150	AT2G27990	AT2G39445
AT3G47480	AT2G28755	AT5G50375
AT2G16676	AT2G29630	AT4G14600
AT4G27850	AT2G29890	AT1G48095
AT1G61370	AT2G30130	AT5G51570
AT2G17500	AT2G30200	AT1G54940
AT2G04495	AT2G31360	AT1G64250
AT2G47950	AT2G31830	AT1G17580
AT5G15480	AT2G31890	AT1G19140
AT4G01700	AT2G32240	AT4G39020
AT1G21930	AT2G33760	AT1G74530
AT1G26390	AT2G34120	AT3G51325
AT2G18690	AT2G34680	AT4G26020
AT1G03940	AT2G34790	AT3G14700
AT1G70130	AT2G35120	AT2G46340
AT2G20320	AT2G35280	AT4G33470
AT5G35050	AT2G35610	AT3G20560
AT2G42980	AT2G35890	AT4G04670
AT4G01350	AT2G36490	AT5G54760
AT2G22930	AT2G36700	AT1G60545
AT3G49980	AT2G38070	AT4G38520
AT4G00500	AT2G39140	AT4G30190
AT4G08450	AT2G39180	AT2G24140
AT4G28930	AT2G40116	AT1G31880
AT4G10500	AT2G41390	AT1G51805
AT3G14470	AT2G41460	AT5G44840
AT5G47980	AT2G41500	AT2G40950
AT2G14878	AT2G41920	AT3G23040
AT1G26410	AT2G44100	AT4G24230
AT1G21529	AT2G44240	AT5G36260
AT3G22850	AT2G45100	AT3G54250
AT2G36730	AT2G45900	AT1G11265
AT2G04400	AT2G47250	AT4G19400
AT1G61360	AT3G01175	AT4G19410
AT5G35425	AT3G01320	AT1G80910
AT1G02470	AT3G01540	AT2G16270
AT4G33770	AT3G03260	AT2G39830
AT5G25260	AT3G03470	AT5G35390
AT4G14368	AT3G04220	AT4G24100
AT5G63680	AT3G04380	AT1G01340
AT5G52700	AT3G05440	AT5G42965
AT5G45720	AT3G05540	AT1G31090
AT3G03790	AT3G09390	AT3G47580
AT4G02320	AT3G10180	AT3G47590
AT2G38250	AT3G11290	AT3G56440
AT1G74270	AT3G11980	AT5G43460
AT3G14700	AT3G13210	AT1G61010
AT5G45000	AT3G13750	AT1G43850
AT3G43250	AT3G14470	AT1G30490
AT1G13340	AT3G14610	AT1G52640
AT1G62760	AT3G14670	AT3G11530
AT4G05140	AT3G15390	AT5G46550
AT2G36724	AT3G15518	AT1G17400
AT2G18720	AT3G16680	AT4G08310
AT4G15540	AT3G17320	AT5G61580
AT5G58620	AT3G17400	AT3G29110
AT1G08590	AT3G18330	AT5G54320
AT3G25610	AT3G19350	AT1G09640
AT5G23950	AT3G20950	AT1G18360
AT3G09830	AT3G21295	AT5G66410
AT3G15518	AT3G21300	AT3G24190
AT5G15070	AT3G21490	AT1G23890
AT3G19970	AT3G21520	AT1G29400
AT3G26614	AT3G21900	AT5G25430
AT1G26420	AT3G22230	AT4G19045
AT4G38560	AT3G22400	AT2G16390
AT2G16230	AT3G22600	AT2G16400
AT3G30340	AT3G22790	AT3G13120
AT1G63530	AT3G22968	AT1G65240
AT3G29970	AT3G23450	AT4G15570
AT4G22217	AT3G23920	AT4G12720
AT5G17390	AT3G24340	AT3G61180
AT1G49800	AT3G24360	AT5G52545
AT4G32250	AT3G26210	AT5G57450
AT1G28180	AT3G26480	AT1G19450
AT5G25930	AT3G26510	AT5G19080
AT4G36430	AT3G26860	AT1G60650
AT3G44510	AT3G27180	AT2G29880
AT1G13470	AT3G27190	AT3G12950
AT4G39675	AT3G27530	AT1G26610
AT5G53048	AT3G27890	AT1G36150
AT1G33030	AT3G28020	AT1G71270
AT1G35625	AT3G28155	AT5G37600
AT1G26380	AT3G28210	AT5G24910
AT2G07678	AT3G28390	AT3G01280
AT5G27950	AT3G28410	AT5G33370
AT5G55410	AT3G28510	AT5G51660
AT3G63380	AT3G28530	AT5G37970
AT2G15830	AT3G28540	AT3G18680
AT5G14550	AT3G28820	AT1G75700
AT4G10720	AT3G28918	AT1G25260
AT5G26690	AT3G28960	AT2G30250
AT4G20210	AT3G29010	AT3G50360
AT1G61550	AT3G29075	AT4G08300
AT2G16870	AT3G29080	AT2G06255
AT3G10320	AT3G29255	AT1G54700
AT2G04070	AT3G29580	AT1G54710
AT4G15120	AT3G29590	AT1G10540
AT2G14290	AT3G29638	AT3G11070
AT5G53110	AT3G29720	AT5G22500
AT1G08310	AT3G29760	AT1G12050
AT1G55790	AT3G29770	AT3G16310
AT1G32950	AT3G29780	AT1G69250
AT1G43910	AT3G29790	AT5G35341
AT3G62590	AT3G29810	AT5G22355
AT4G22470	AT3G29970	AT5G56150
AT4G21390	AT3G30210	AT2G16970
AT2G22770	AT3G30220	AT5G56450
AT5G64000	AT3G30430	AT1G62800
AT3G21700	AT3G30520	AT1G34580
AT3G57240	AT3G30770	AT5G62420
AT3G48300	AT3G30778	AT1G01680
AT4G37370	AT3G30805	AT3G10820
AT3G56000	AT3G30845	AT5G21090
AT3G05690	AT3G31350	AT4G30600
AT4G39980	AT3G31400	AT5G63510
AT2G05710	AT3G31402	AT5G20350
AT3G51970	AT3G31900	AT3G14205
AT1G17290	AT3G31950	AT3G48230
AT5G20960	AT3G32036	AT1G02305
AT5G05730	AT3G32047	AT1G21250
AT4G04610	AT3G32050	AT2G20000
AT4G09030	AT3G32052	AT1G29590
AT2G22470	AT3G32090	AT2G17530
AT3G59140	AT3G32180	AT2G25270
AT3G13100	AT3G32260	AT4G33510
AT5G13320	AT3G32330	AT1G18490
AT1G61810	AT3G32410	AT1G05590
AT5G17860	AT3G33187	AT5G39620
AT5G58940	AT3G33293	AT3G06660
AT4G23700	AT3G33520	AT4G13494
AT1G29230	AT3G42050	AT2G40570
AT1G21250	AT3G42310	AT3G61730
AT1G01340	AT3G42385	AT1G52320
AT3G17690	AT3G42670	AT4G13350
AT4G04490	AT3G42728	AT1G05055
AT4G04510	AT3G42723	AT3G15340
AT4G04540	AT3G42780	AT5G21105
AT2G39770	AT3G42990	AT3G16840
AT2G04040	AT3G43120	AT4G16155
AT4G25640	AT3G43150	AT5G51470
AT3G11670	AT3G43160	AT5G61030
AT4G34200	AT3G43300	AT4G15396
AT4G00900	AT3G43340	AT1G51340
AT5G25250	AT3G43540	AT3G59765
AT4G15200	AT3G43750	AT3G11290
AT1G70140	AT3G43870	AT4G34400
AT5G39190	AT3G44100	AT5G24030
AT1G78360	AT3G44180	AT1G53840
AT3G47420	AT3G44200	AT3G06600
AT4G28490	AT3G44210	AT1G24095
AT4G37680	AT3G44235	AT4G32830
AT1G51760	AT3G44261	AT1G68910
AT1G51800	AT3G44600	AT5G07280
AT3G45140	AT3G44704	AT4G05140
AT1G17420	AT3G44800	AT1G02980
AT2G36530	AT3G44830	AT5G64630
AT3G46330	AT3G44935	AT5G16140
AT2G47275	AT3G45020	AT1G17840
AT3G59884	AT3G45190	AT2G33080
AT2G25680	AT3G45210	AT2G39840
AT5G20410	AT3G45430	AT3G05070
AT2G19900	AT3G45450	AT1G47400
AT2G22560	AT3G45670	AT2G13690
AT1G37130	AT3G45770	AT5G62530
AT1G31885	AT3G46000	AT2G29720
AT1G63020	AT3G46180	AT1G64980
AT3G61990	AT3G46620	AT4G27060
AT1G16370	AT3G46710	AT1G08740
AT1G73220	AT3G46904	AT4G28580
AT3G20660	AT3G46970	AT5G06310
AT5G39050	AT3G47040	AT4G25440
AT2G40180	AT3G47300	AT2G27810
AT5G43350	AT3G47470	AT3G46340
AT3G54700	AT3G47540	AT3G54610
AT1G53310	AT3G48120	AT5G39490
AT5G56630	AT3G48770	AT5G53810
AT2G26560	AT3G49140	AT5G44590
AT3G05630	AT3G49330	AT1G20110
AT3G26840	AT3G49500	AT2G33110
AT2G26010	AT3G50470	AT4G14420
AT2G18660	AT3G50480	AT5G46700
AT1G52940	AT3G50620	AT5G16440
AT3G53620	AT3G51580	AT1G07930
AT3G26090	AT3G52050	AT2G30290
AT4G21470	AT3G52170	AT3G57930
AT1G12210	AT3G54190	AT5G25410
AT1G11180	AT3G55410	AT5G51650
AT3G08720	AT3G55430	AT2G37680
AT2G26660	AT3G56960	AT3G04780
AT4G08390	AT3G57090	AT4G12790
AT5G66760	AT3G57880	AT4G08560
AT3G43190	AT3G59700	AT1G53580
AT1G66570	AT3G60050	AT3G55260
AT4G02050	AT3G60180	AT4G03460
AT1G22150	AT3G60960	AT4G22820
AT4G33030	AT3G62030	AT3G56480
AT1G74100	AT3G63380	AT3G53760
AT5G54810	AT3G63440	AT5G57620
AT4G23920	AT4G00140	AT3G22980
AT3G56040	AT4G00170	AT4G27730
AT2G36750	AT4G00380	AT1G28000
AT3G53150	AT4G00700	AT1G55220
AT1G24100	AT4G00770	AT3G21080
AT1G05620	AT4G00830	AT5G42970
AT1G21240	AT4G01460	AT3G14360
AT1G21230	AT4G01516	AT1G01110
AT1G80840	AT4G01520	AT4G32880
AT5G24380	AT4G02390	AT1G75760
AT2G47020	AT4G02520	AT3G06040
AT2G32500	AT4G02750	AT2G40935
AT1G74290	AT4G03090	AT2G31680
AT2G17033	AT4G03110	AT3G53780
AT1G29560	AT4G03190	AT3G05330
AT2G03140	AT4G03565	AT1G56650
AT5G28415	AT4G03570	AT2G41250
AT1G02890	AT4G03827	AT4G10510
AT1G12020	AT4G03830	AT5G43310
AT4G26680	AT4G03950	AT1G04830
AT5G44578	AT4G04110	AT4G01390
AT5G26670	AT4G04450	AT1G02970
AT4G08300	AT4G04460	AT1G28630
AT5G51150	AT4G04490	AT4G09990
AT2G15020	AT4G04540	AT3G43190
AT2G21045	AT4G04601	AT3G47740
AT4G21250	AT4G04650	AT3G16090
AT1G66180	AT4G04960	AT1G70410
AT1G68400	AT4G05080	AT3G45310
AT5G49152	AT4G05360	AT3G52030
AT5G28262	AT4G05370	AT3G52040
AT1G63100	AT4G05620	AT1G48400
AT5G17165	AT4G05632	AT2G45250
AT4G16008	AT4G06479	AT5G06940
AT5G25040	AT4G06490	AT1G56340
AT5G15360	AT4G06536	AT3G20960
AT5G19740	AT4G06639	AT5G46877
AT3G52490	AT4G06599	AT5G54520
AT1G50050	AT4G06688	AT4G14615
AT3G50370	AT4G06740	AT1G08490
AT2G26215	AT4G06746	AT3G13870
AT2G15880	AT4G07524	AT5G48640
AT3G63070	AT4G07526	AT3G45840
AT5G57100	AT4G07675	AT5G21040
AT3G53680	AT4G07868	AT1G26208
AT1G30870	AT4G07932	AT1G09195
AT3G04450	AT4G07990	AT4G29820
AT4G28410	AT4G08025	AT1G77530
AT5G28630	AT4G08073	AT4G17480
AT5G59070	AT4G08140	AT3G24715
AT3G01345	AT4G08190	AT5G45250
AT5G13770	AT4G08263	AT3G16180
AT5G67385	AT4G08267	AT1G05880
AT4G01330	AT4G08300	AT5G18120
AT1G67900	AT4G08350	AT5G61820
AT5G24155	AT4G08450	AT4G30490
AT5G27890	AT4G08470	AT4G13850
AT4G18250	AT4G08500	AT3G25120
AT3G46600	AT4G08593	AT3G09830
AT5G35170	AT4G08620	AT3G56450
AT5G04960	AT4G08670	AT5G05140
AT3G26490	AT4G08685	AT3G04100
AT1G17450	AT4G08691	AT3G02930
AT2G15960	AT4G08700	AT2G39805
AT5G10800	AT4G08850	AT3G22200
AT2G05632	AT4G08870	AT5G56020
AT1G78020	AT4G08895	AT3G56490
AT1G33640	AT4G08910	AT1G15160
AT1G64310	AT4G08940	AT3G21200
AT3G24190	AT4G09587	AT5G05840
AT4G02660	AT4G10150	AT5G22720
AT1G62310	AT4G10160	AT3G15260
AT2G16270	AT4G10210	AT3G13450
AT3G16180	AT4G10380	AT1G12880
AT3G18845	AT4G10490	AT5G06240
AT1G67870	AT4G10603	AT4G18700
AT5G38000	AT4G10620	AT3G03360
AT5G37010	AT4G10695	AT3G15020
AT2G32240	AT4G10850	AT1G60150
AT3G01310	AT4G10870	AT2G01905
AT4G38340	AT4G11070	AT5G41600
AT5G46450	AT4G11170	AT1G78550
AT3G22142	AT4G11230	AT1G62190
AT1G26270	AT4G11240	AT3G08740
AT1G09460	AT4G11670	AT4G11845
AT5G02860	AT4G11790	AT1G32550
AT4G15590	AT4G12230	AT3G59440
AT1G50732	AT4G12420	AT5G40710
AT5G52790	AT4G12430	AT1G67270
AT1G52870	AT4G12690	AT5G25754
AT4G20820	AT4G12810	AT4G24250
AT1G74770	AT4G13420	AT3G57790
AT1G27180	AT4G13820	AT1G12840
AT2G16140	AT4G13890	AT2G42070
AT5G44530	AT4G13920	AT3G22630
AT1G61760	AT4G14400	AT3G53400
AT3G07070	AT4G14980	AT3G53402
AT3G22275	AT4G15096	AT3G54440
AT1G35660	AT4G15200	AT5G48410
AT1G52320	AT4G15890	AT1G19940
AT3G22150	AT4G16015	AT3G16565
AT1G64720	AT4G16890	AT4G14030
AT4G04930	AT4G16960	AT4G15320
AT2G31970	AT4G17453	AT3G21940
AT1G20080	AT4G17590	AT4G23260
AT5G28080	AT4G17713	AT2G07787
AT5G36120	AT4G17810	AT1G68210
AT3G48290	AT4G17870	AT2G33030
AT3G26310	AT4G18150	AT1G68030
AT3G14630	AT4G18375	AT1G66970
AT1G24540	AT4G18470	AT2G04630
AT1G49720	AT4G19130	AT4G21530
AT1G76990	AT4G19900	AT4G20130
AT5G40820	AT4G20170	AT1G53420
AT4G01820	AT4G20480	AT1G14140
AT1G30410	AT4G21030	AT1G66040
AT1G19220	AT4G21670	AT3G55480
AT2G28470	AT4G22590	AT3G25090
AT3G25690	AT4G23060	AT1G04920
AT5G52100	AT4G23100	AT2G38880
AT3G42670	AT4G23130	AT1G52343
AT4G19020	AT4G23150	AT2G35170
AT2G28190	AT4G23210	AT1G15215
AT4G08920	AT4G23340	AT1G10417
AT2G26760	AT4G23440	AT1G59990
AT3G21870	AT4G24300	AT4G12330
AT3G01480	AT4G24680	AT1G21600
AT4G14140	AT4G25020	AT1G20640
AT3G05680	AT4G25515	AT4G29590
AT3G04340	AT4G25960	AT3G06030
AT5G19820	AT4G26350	AT3G23220
AT4G05520	AT4G26600	AT2G29650
AT4G13390	AT4G27370	AT1G23260
AT3G17320	AT4G28010	AT4G04760
AT1G50240	AT4G28980	AT1G73030
AT2G24720	AT4G29890	AT2G24650
AT5G24920	AT4G30130	AT5G10520
AT4G04330	AT4G30150	AT3G56830
AT5G64390	AT4G30770	AT1G32790
AT3G54590	AT4G31780	AT1G69570
AT5G55250	AT4G31800	AT1G69572
AT4G16480	AT4G32295	AT3G13460
AT1G05360	AT4G32375	AT2G20900
AT2G46740	AT4G32560	AT4G32960
AT4G10340	AT4G32870	AT5G09400
AT4G25560	AT4G33050	AT1G53110
AT3G58810	AT4G33300	AT2G28990
AT5G35407	AT4G34400	AT1G69510
AT3G60840	AT4G35770	AT1G71070
AT2G01530	AT4G37830	AT3G17590
AT3G08500	AT4G38050	AT3G12980
AT1G70760	AT4G38550	AT1G07800
AT2G23050	AT4G38560	AT2G02810
AT5G09660	AT4G39120	AT5G10330
AT2G34710	AT5G01550	AT1G50970
AT2G33770	AT5G01730	AT5G51090
AT5G26570	AT5G02030	AT1G63330
AT1G61520	AT5G02480	AT2G28550
AT1G50840	AT5G02860	AT1G23510
AT2G18470	AT5G04130	AT1G31540
AT5G02310	AT5G04260	AT1G54840
AT1G30510	AT5G04780	AT5G10100
AT3G55980	AT5G06050	AT2G44255
AT5G63780	AT5G07400	AT2G44260
AT4G11110	AT5G07410	AT5G65120
AT1G53160	AT5G08020	AT5G62540
AT3G02850	AT5G09290	AT2G25355
AT1G04110	AT5G09860	AT1G10310
AT1G12280	AT5G11680	AT5G53710
AT4G16890	AT5G11880	AT4G26790
AT2G29630	AT5G13310	AT4G26795
AT5G46700	AT5G13680	AT5G47390
AT1G70320	AT5G14260	AT3G09080
AT3G48260	AT5G14610	AT5G51770
AT5G55820	AT5G15170	AT3G09720
AT1G65730	AT5G15630	AT2G47060
	AT5G15780	AT1G47890
	AT5G16270	AT1G26530
	AT5G16715	AT4G16144
	AT5G17160	AT2G21790
	AT5G17790	AT5G57655
	AT5G17860	AT3G14120
	AT5G18570	AT5G43035
	AT5G18720	AT5G41280
	AT5G18840	AT2G13810
	AT5G19160	AT3G14010
	AT5G19240	AT2G30350
	AT5G19610	AT2G02380
	AT5G19820	AT1G18560
	AT5G20050	AT2G39170
	AT5G22520	AT2G42130
	AT5G22560	AT1G32140
	AT5G22608	AT3G59390
	AT5G23010	AT1G56260
	AT5G23380	AT1G32200
	AT5G23720	AT3G06230
	AT5G24210	AT3G06050
	AT5G24320	AT4G01037
	AT5G24370	AT3G10920
	AT5G24520	AT5G51320
	AT5G24780	AT1G35320
	AT5G25880	AT3G11170
	AT5G26040	AT4G13070
	AT5G26170	AT4G02790
	AT5G26240	AT4G10890
	AT5G26610	AT2G28360
	AT5G26600	AT3G46180
	AT5G26840	AT2G44470
	AT5G26848	AT5G39040
	AT5G27220	AT1G50050
	AT5G27247	AT1G60690
	AT5G27280	AT2G31020
	AT5G27440	AT3G10840
	AT5G27570	AT5G41530
	AT5G27606	AT3G43520
	AT5G27680	AT1G04940
	AT5G27944	AT1G04945
	AT5G27950	AT3G47833
	AT5G28040	AT3G10070
	AT5G28090	AT4G15520
	AT5G28150	AT5G54430
	AT5G28370	AT3G12200
	AT5G28410	AT4G18160
	AT5G28465	AT3G51870
	AT5G28491	AT2G43070
	AT5G28520	AT1G74310
	AT5G28642	AT3G26280
	AT5G28821	AT2G21150
	AT5G28885	AT3G58460
	AT5G28931	AT2G47310
	AT5G29231	AT5G46400
	AT5G29560	AT5G40290
	AT5G29807	AT1G78790
	AT5G31412	AT5G26570
	AT5G30510	AT2G37280
	AT5G32590	AT5G51400
	AT5G32597	AT1G29150
	AT5G32613	AT1G37150
	AT5G33355	AT1G10670
	AT5G33370	AT3G61220
	AT5G33393	AT2G44860
	AT5G33421	AT2G14210
	AT5G33806	AT4G13870
	AT5G34581	AT5G65050
	AT5G34829	AT4G24580
	AT5G34850	AT3G19780
	AT5G34882	AT3G19790
	AT5G34930	AT1G43245
	AT5G34940	AT5G24440
	AT5G35069	AT1G79640
	AT5G35160	AT4G39330
	AT5G35338	AT5G09410
	AT5G35360	AT5G07020
	AT5G35390	AT5G44800
	AT5G35450	AT4G02700
	AT5G35490	AT2G04540
	AT5G35603	AT3G29190
	AT5G35770	AT5G04740
	AT5G35920	AT3G16620
	AT5G35940	AT1G28480
	AT5G36080	AT1G34120
	AT5G36280	AT4G29420
	AT5G36300	AT2G28085
	AT5G36480	AT1G07830
	AT5G36890	AT3G26070
	AT5G37610	AT3G19420
	AT5G37667	AT3G25727
	AT5G37770	AT5G48030
	AT5G37790	AT5G13530
	AT5G38000	AT3G54800
	AT5G38010	AT3G61210
	AT5G38040	AT3G60100
	AT5G38190	AT3G03610
	AT5G38210	AT2G19000
	AT5G38250	AT1G53550
	AT5G38344	AT3G14520
	AT5G38450	AT3G18140
	AT5G38550	AT2G45690
	AT5G38560	AT5G10160
	AT5G38710	AT3G16340
	AT5G38830	AT2G37700
	AT5G38860	AT4G14710
	AT5G39200	AT4G20720
	AT5G39670	AT1G72700
	AT5G39680	AT3G51700
	AT5G39690	AT4G15010
	AT5G39860	AT3G05970
	AT5G39865	AT5G51140
	AT5G40030	AT3G49010
	AT5G42260	AT1G33070
	AT5G42530	AT1G18090
	AT5G42640	AT1G59510
	AT5G43110	AT3G24590
	AT5G43745	AT5G48770
	AT5G43810	AT5G48775
	AT5G44640	AT3G16480
	AT5G44660	AT2G26850
	AT5G44740	AT2G06020
	AT5G44840	AT1G06720
	AT5G44930	AT4G14820
	AT5G45020	AT5G25300
	AT5G45110	AT1G04470
	AT5G45190	AT3G28670
	AT5G45550	AT4G17180
	AT5G45573	AT1G65346
	AT5G45730	AT1G65350
	AT5G46700	AT1G10010
	AT5G47130	AT3G56370
	AT5G47220	AT3G55440
	AT5G47410	AT1G26690
	AT5G47860	AT1G01910
	AT5G47980	AT3G53810
	AT5G48410	AT3G04605
	AT5G48545	AT2G17520
	AT5G48740	AT2G38720
	AT5G48880	AT2G25370
	AT5G48960	AT2G41770
	AT5G49070	AT3G57680
	AT5G49470	AT4G36780
	AT5G50310	AT1G61820
	AT5G51590	AT4G11240
	AT5G51890	AT2G42670
	AT5G51980	AT2G24960
	AT5G52050	AT2G24970
	AT5G52150	AT1G65450
	AT5G52710	AT1G59680
	AT5G52980	AT1G12665
	AT5G53120	AT4G14070
	AT5G53450	AT1G17640
	AT5G54280	AT5G16900
	AT5G54440	AT5G18720
	AT5G54610	AT3G54510
	AT5G55010	AT1G30240
	AT5G55070	AT4G34900
	AT5G55460	AT5G21140
	AT5G56250	AT2G43465
	AT5G56380	AT1G47210
	AT5G57480	AT5G02320
	AT5G57940	AT4G23440
	AT5G58160	AT2G17610
	AT5G59010	AT1G40080
	AT5G59280	AT1G22060
	AT5G59670	AT4G03300
	AT5G60280	AT1G72300
	AT5G62970	AT3G51840
	AT5G65460	AT1G74240
	AT5G67340	AT1G78915
	AT1G06475	AT3G48780
		AT1G75670
		AT1G58602
		AT4G03030
		AT1G67480
		AT5G03190
		AT1G03445
		AT1G12970
		AT5G27620
		AT1G27770
		AT2G17840
		AT2G33560
		AT5G03280
		AT5G36940
		AT1G67670
		AT5G13440
		AT1G24706
		AT3G55930
		AT4G25500
		AT4G31720
		AT2G44065
		AT3G05570
		AT1G75920
		AT4G24770
		AT5G55520
		AT2G07698
		AT3G53630
		AT4G05475
		AT4G20650
		AT3G15400
		AT3G14000
		AT1G80150
		AT1G75730
		AT5G27360
		AT3G56050
		AT1G11300
		AT4G24690
		AT5G19960
		AT2G17360
		AT1G23950
		AT1G77350
		AT5G18490
		AT1G65090
		AT1G03040
		AT3G10986
		AT5G53310
		AT1G70970
		AT3G10380
		AT5G49340
		AT5G43140
		AT1G09870
		AT2G32900
		AT1G02270
		AT1G09660
		AT3G06710
		AT1G13040
		AT3G02570
		AT5G35690
		AT3G03010
		AT3G43840
		AT5G40850
		AT4G29520
		AT3G62190
		AT4G11160
		AT1G76050
		AT3G24730
		AT5G55490
		AT3G46350
		AT5G24680
		AT4G05595
		AT3G07640
		AT2G21720
		AT5G44690
		AT3G28490
		AT4G27800
		AT5G44280
		AT4G25515
		AT4G23400
		AT4G13330
		AT1G72640
		AT5G07940
		AT1G27480
		AT1G48110
		AT1G49005
		AT3G07730
		AT5G48680
		AT2G31030
		AT2G40820
		AT4G26730
		AT5G02670
		AT1G11593
		AT3G56850
		AT4G01610
		AT3G23710
		AT3G52190
		AT5G50840
		AT5G37630
		AT1G25540
		AT1G70490
		AT3G44310
		AT2G34750
		AT1G13730
		AT4G14970
		AT5G48515
		AT3G04490
		AT1G26640
		AT5G43900
		AT3G21230
		AT4G12830
		AT2G44280
		AT3G11680
		AT3G04580
		AT1G26680
		AT3G17920
		AT4G08039
		AT4G25550
		AT5G02480
		AT1G14190
		AT3G49290
		AT3G20740
		AT3G11880
		AT3G07880
		AT1G24460
		AT4G10955
		AT4G10960
		AT1G27430
		AT1G62040
		AT3G52050
		AT5G20310
		AT3G21870
		AT4G14370
		AT5G06265
		AT2G27320
		AT1G58110
		AT5G63420
		AT4G18905
		AT4G33680
		AT1G49180
		AT3G48900
		AT2G41760
		AT5G08190
		AT1G16240
		AT3G43444
		AT5G60920
		AT5G47510
		AT5G27890
		AT3G56420
		AT4G01000
		AT5G58170
		AT5G08270
		AT1G04390
		AT1G70430
		AT4G09830
		AT1G23460
		AT4G17950
		AT1G53265
		AT5G16715
		AT5G21900
		AT1G21870
		AT4G15350
		AT5G52890
		AT1G52670
		AT1G29750
		AT5G60300
		AT5G42570
		AT5G10630
		AT3G58020
		AT5G27710
		AT4G27750
		AT1G61040
		AT2G41700
		AT1G67280
		AT1G59453
		AT3G47940
		AT3G17000
		AT1G67210
		AT2G30505
		AT2G30820
		AT1G75330
		AT4G16444
		AT5G15320
		AT1G26940
		AT5G46910
		AT1G50160
		AT1G17760
		AT4G09425
		AT4G21150
		AT4G02550
		AT2G31470
		AT2G07743
		AT1G53640
		AT1G60440
		AT5G24900
		AT1G65550
		AT1G14560
		AT4G01533
		AT3G11010
		AT5G19400
		AT2G22630
		AT1G06790
		AT5G20590
		AT3G22380
		AT5G19920
		AT5G49615
		AT5G65687
		AT4G24500
		AT3G18730
		AT2G04390
		AT3G27730
		AT1G64110
		AT1G27410
		AT4G14713
		AT5G43530
		AT1G49170
		AT2G33340
		AT1G48830
		AT2G07721
		AT4G10603
		AT4G23140
		AT5G57100
		AT5G20165
		AT3G47080
		AT1G54115
		AT4G24430
		AT2G46710
		AT4G17140
		AT5G45070
		AT1G71697
		AT1G71700
		AT5G33390
		AT3G12300
		AT2G03810
		AT1G79529
		AT5G37840
		AT4G26010
		AT3G19260
		AT1G01020
		AT5G01140
		AT3G01160
		AT3G01300
		AT2G01130
		AT3G01320
		AT1G01320
		AT3G01350
		AT3G01360
		AT2G01280
		AT3G01410
		AT3G01435
		AT1G01520
		AT1G01540
		AT5G01550
		AT3G01640
		AT1G01690
		AT1G01700
		AT5G01700
		AT5G01720
		AT3G01770
		AT2G01630
		AT1G01790
		AT5G01770
		AT5G01800
		AT2G01720
		AT5G01850
		AT2G01790
		AT2G01800
		AT4G00830
		AT5G01960
		AT4G00893
		AT5G02100
		AT5G02130
		AT2G01920
		AT5G02170
		AT2G01960
		AT1G02290
		AT2G01990
		AT1G02420
		AT1G02430
		AT4G01290
		AT4G01320
		AT2G02148
		AT3G02590
		AT2G02160
		AT5G02620
		AT1G02740
		AT5G02660
		AT3G02800
		AT3G02830
		AT2G02340
		AT3G02850
		AT2G02370
		AT1G02860
		AT1G02870
		AT2G02470
		AT3G02940
		AT2G02498
		AT4G01540
		AT3G03050
		AT3G03060
		AT5G02990
		AT1G03060
		AT4G01720
		AT5G03160
		AT3G03260
		AT3G03300
		AT1G03200
		AT2G02780
		AT2G02790
		AT3G03370
		AT1G03270
		AT4G01860
		AT5G03360
		AT1G03380
		AT5G03415
		AT5G03420
		AT5G03440
		AT5G03450
		AT1G03470
		AT2G02980
		AT4G02000
		AT1G03590
		AT4G02075
		AT5G03620
		AT5G03680
		AT5G03720
		AT2G03240
		AT2G03260
		AT2G03270
		AT3G03900
		AT4G02300
		AT5G03830
		AT5G03860
		AT5G03970
		AT4G02460
		AT5G03990
		AT5G03995
		AT4G02480
		AT5G04020
		AT3G04240
		AT2G03750
		AT5G04180
		AT4G02630
		AT3G04350
		AT5G04240
		AT1G04370
		AT1G04425
		AT4G02710
		AT5G04320
		AT5G04380
		AT4G02800
		AT2G03970
		AT3G04630
		AT2G03980
		AT5G04480
		AT4G02880
		AT4G02930
		AT1G04700
		AT4G02980
		AT5G04620
		AT1G04750
		AT1G04780
		AT1G04850
		AT4G03090
		AT1G04880
		AT5G04800
		AT4G03140
		AT1G04930
		AT4G03165
		AT3G05040
		AT3G05050
		AT4G03200
		AT1G04970
		AT4G03220
		AT5G04960
		AT1G05090
		AT4G03320
		AT2G04280
		AT4G03380
		AT1G05160
		AT2G04300
		AT5G05080
		AT3G05310
		AT5G05200
		AT3G05400
		AT3G05410
		AT5G05260
		AT3G05420
		AT2G04530
		AT3G05470
		AT5G05400
		AT3G05545
		AT2G04690
		AT3G05670
		AT3G05680
		AT1G05620
		AT5G05630
		AT3G05740
		AT3G05750
		AT3G05770
		AT5G05700
		AT1G05740
		AT3G05790
		AT3G05810
		AT5G05800
		AT5G05820
		AT3G05910
		AT3G05930
		AT3G05932
		AT3G05940
		AT1G05950
		AT5G06100
		AT2G05120
		AT3G06140
		AT5G06160
		AT1G06148
		AT5G06180
		AT5G06210
		AT3G06250
		AT1G06250
		AT3G06340
		AT1G06290
		AT5G06400
		AT1G06430
		AT5G06440
		AT1G06460
		AT2G05390
		AT3G06440
		AT4G04120
		AT1G06490
		AT1G06550
		AT4G04190
		AT1G06630
		AT4G04223
		AT1G06670
		AT3G06560
		AT5G06670
		AT3G06630
		AT5G06750
		AT4G04310
		AT1G06820
		AT5G06780
		AT4G04320
		AT3G06730
		AT5G06950
		AT1G07040
		AT1G07080
		AT2G05760
		AT3G06940
		AT5G07070
		AT5G07100
		AT5G07140
		AT3G07040
		AT5G07180
		AT3G07070
		AT1G07300
		AT5G07210
		AT3G07140
		AT1G07420
		AT3G07180
		AT5G07270
		AT5G07290
		AT5G07340
		AT2G06000
		AT1G07570
		AT5G07420
		AT5G07430
		AT3G07370
		AT1G07650
		AT4G04700
		AT4G04710
		AT3G07560
		AT4G04745
		AT5G07630
		AT5G07650
		AT1G07880
		AT4G04810
		AT4G04840
		AT3G07680
		AT3G07690
		AT3G07740
		AT1G07980
		AT3G07770
		AT5G07790
		AT4G04930
		AT3G07960
		AT1G08190
		AT3G08500
		AT5G08055
		AT3G08505
		AT1G08220
		AT4G05090
		AT3G08670
		AT5G08200
		AT3G08850
		AT1G08620
		AT3G08980
		AT4G05420
		AT3G09010
		AT5G08550
		AT1G08720
		AT3G09110
		AT1G08810
		AT4G05540
		AT3G09210
		AT5G08720
		AT2G06950
		AT5G09225
		AT5G09290
		AT3G09405
		AT1G09060
		AT2G07050
		AT1G09190
		AT5G09560
		AT5G09600
		AT5G09630
		AT1G09245
		AT3G09760
		AT5G09660
		AT3G09810
		AT1G09450
		AT1G09460
		AT1G09470
		AT3G09960
		AT1G09490
		AT5G09900
		AT3G10140
		AT5G10060
		AT1G09800
		AT1G09840
		AT2G07773
		AT3G10440
		AT2G07749
		AT3G10450
		AT2G07674
		AT3G10670
		AT1G10300
		AT2G07707
		AT5G10790
		AT1G10490
		AT3G11020
		AT3G11030
		AT3G11040
		AT1G10522
		AT3G11200
		AT1G10620
		AT5G11080
		AT3G11270
		AT5G11110
		AT3G11310
		AT3G11350
		AT5G11180
		AT3G11397
		AT3G11402
		AT1G10760
		AT5G11290
		AT1G10820
		AT5G11310
		AT5G11340
		AT3G11510
		AT3G11520
		AT3G11540
		AT1G10920
		AT1G10940
		AT1G10970
		AT3G11670
		AT1G11050
		AT3G11730
		AT3G11770
		AT1G11160
		AT1G11180
		AT3G11920
		AT5G11750
		AT1G11290
		AT5G11830
		AT1G11340
		AT1G11350
		AT5G11900
		AT3G12120
		AT3G12170
		AT3G12220
		AT3G12240
		AT5G12200
		AT1G11720
		AT3G12480
		AT5G12260
		AT5G12290
		AT1G11785
		AT3G12560
		AT1G11905
		AT1G11910
		AT1G11950
		AT3G12770
		AT5G12860
		AT5G12960
		AT1G12140
		AT1G12150
		AT1G12240
		AT5G13120
		AT5G13160
		AT1G12300
		AT3G13062
		AT3G13080
		AT5G13190
		AT3G13200
		AT1G12470
		AT1G12480
		AT3G13230
		AT3G13235
		AT5G13340
		AT5G13420
		AT5G13430
		AT3G13330
		AT5G13500
		AT5G13520
		AT5G13560
		AT5G13570
		AT5G13640
		AT5G13740
		AT1G13030
		AT5G13780
		AT5G13800
		AT5G13870
		AT3G13772
		AT1G13270
		AT3G13900
		AT3G13930
		AT1G13540
		AT1G13560
		AT3G14050
		AT5G14440
		AT5G14460
		AT3G14075
		AT1G13630
		AT5G14580
		AT1G13820
		AT1G13970
		AT5G14800
		AT1G13980
		AT1G13990
		AT1G14010
		AT1G14030
		AT1G14130
		AT1G14170
		AT5G15020
		AT5G15090
		AT1G14340
		AT1G14360
		AT1G14380
		AT1G14390
		AT5G15170
		AT3G14680
		AT5G15260
		AT4G08090
		AT3G14840
		AT3G14860
		AT3G14900
		AT1G14650
		AT3G14950
		AT3G15000
		AT1G14690
		AT3G15010
		AT5G15540
		AT5G15610
		AT1G14780
		AT3G15150
		AT5G15680
		AT3G15160
		AT5G15740
		AT5G15780
		AT3G15290
		AT5G15840
		AT3G15410
		AT1G15150
		AT4G08330
		AT1G15340
		AT5G16280
		AT3G15750
		AT4G08450
		AT5G16500
		AT3G15950
		AT2G13125
		AT1G15780
		AT4G08550
		AT3G16060
		AT5G16660
		AT1G16080
		AT3G16320
		AT2G13370
		AT3G16350
		AT5G16880
		AT5G16910
		AT1G16280
		AT1G16290
		AT5G16980
		AT1G16330
		AT4G08840
		AT1G16520
		AT1G16610
		AT5G17270
		AT5G17300
		AT1G16670
		AT1G16700
		AT3G16785
		AT1G16750
		AT4G08960
		AT3G16850
		AT1G16800
		AT1G16830
		AT4G08990
		AT2G13820
		AT4G09012
		AT4G09020
		AT4G09060
		AT5G17620
		AT1G16980
		AT3G17040
		AT1G17000
		AT4G09140
		AT5G17690
		AT1G17050
		AT1G17070
		AT1G17130
		AT2G13950
		AT2G13970
		AT1G17220
		AT5G17880
		AT3G17320
		AT1G17280
		AT2G14080
		AT5G17920
		AT1G17350
		AT3G17365
		AT3G17380
		AT1G17370
		AT3G17410
		AT2G14170
		AT3G17465
		AT3G17500
		AT4G09455
		AT1G17450
		AT3G17540
		AT4G09490
		AT5G18245
		AT1G17550
		AT5G18330
		AT5G18360
		AT5G18400
		AT1G17720
		AT1G17745
		AT5G18420
		AT5G18440
		AT1G17790
		AT3G17900
		AT1G17820
		AT4G09740
		AT1G17870
		AT5G18540
		AT4G09770
		AT1G17920
		AT3G18040
		AT2G14520
		AT3G18070
		AT1G18040
		AT5G18660
		AT3G18160
		AT3G18200
		AT4G09950
		AT1G18130
		AT1G18180
		AT2G14670
		AT3G18290
		AT1G18270
		AT1G18370
		AT1G18410
		AT5G19000
		AT5G19010
		AT1G18470
		AT2G14820
		AT3G18520
		AT1G18540
		AT1G18550
		AT1G18610
		AT4G10420
		AT3G18750
		AT4G10465
		AT4G10490
		AT1G18810
		AT2G15042
		AT3G18990
		AT4G10613
		AT5G19473
		AT3G19045
		AT5G19490
		AT4G10660
		AT1G19100
		AT5G19560
		AT2G15230
		AT1G19170
		AT3G19170
		AT2G15290
		AT3G19190
		AT1G19230
		AT1G19240
		AT1G19270
		AT1G19310
		AT5G19770
		AT3G19290
		AT2G15350
		AT4G10920
		AT3G19330
		AT5G19860
		AT1G19410
		AT4G11010
		AT4G11020
		AT3G19450
		AT3G19460
		AT1G19485
		AT1G19520
		AT1G19550
		AT5G20060
		AT1G19600
		AT3G19540
		AT2G15560
		AT1G19650
		AT2G15620
		AT3G19640
		AT5G20220
		AT1G19835
		AT2G15820
		AT3G19840
		AT3G19890
		AT1G20010
		AT3G19960
		AT1G20060
		AT3G20000
		AT4G11600
		AT3G20130
		AT3G20150
		AT5G20830
		AT4G11730
		AT5G20852
		AT2G16365
		AT4G11750
		AT3G20300
		AT5G20890
		AT1G20460
		AT4G11820
		AT3G20410
		AT4G11830
		AT1G20560
		AT1G20570
		AT2G16485
		AT2G16500
		AT3G20480
		AT1G20650
		AT1G20670
		AT4G11960
		AT3G20550
		AT2G16595
		AT1G20750
		AT2G16630
		AT2G16650
		AT3G20700
		AT3G20710
		AT5G21910
		AT5G21920
		AT1G20840
		AT2G16710
		AT1G20860
		AT4G12130
		AT2G16750
		AT5G22000
		AT1G20980
		AT4G12490
		AT3G21160
		AT3G21170
		AT3G21180
		AT4G12545
		AT4G12610
		AT4G12640
		AT4G12670
		AT1G21330
		AT4G12680
		AT5G22510
		AT4G12690
		AT4G12710
		AT1G21410
		AT4G12910
		AT4G12915
		AT5G22760
		AT2G17440
		AT3G21500
		AT1G21630
		AT3G21540
		AT1G21650
		AT2G17550
		AT5G22860
		AT1G21780
		AT1G21810
		AT5G22910
		AT4G13200
		AT5G22950
		AT1G21930
		AT2G17800
		AT3G22030
		AT3G22057
		AT5G23120
		AT4G13400
		AT1G22120
		AT3G22190
		AT1G22200
		AT5G23260
		AT2G18030
		AT4G13495
		AT2G18060
		AT5G23310
		AT2G18070
		AT1G22240
		AT3G22235
		AT1G22250
		AT4G13550
		AT2G18150
		AT2G18180
		AT4G13610
		AT1G22460
		AT2G18250
		AT4G13750
		AT1G22620
		AT3G22590
		AT1G22651
		AT1G22670
		AT4G13885
		AT1G22750
		AT3G22810
		AT4G13990
		AT4G13992
		AT5G23955
		AT5G24000
		AT2G18750
		AT1G22970
		AT3G22955
		AT5G24080
		AT1G23030
		AT5G24150
		AT5G24160
		AT5G24180
		AT2G18950
		AT4G14310
		AT1G23230
		AT1G23340
		AT5G24320
		AT4G14400
		AT1G23360
		AT2G19140
		AT5G24390
		AT4G14480
		AT4G14490
		AT4G14500
		AT3G23330
		AT1G23670
		AT4G14590
		AT1G23700
		AT3G23470
		AT1G23820
		AT4G14720
		AT2G19520
		AT1G23935
		AT5G24750
		AT5G24760
		AT4G14790
		AT3G23633
		AT3G23670
		AT5G24830
		AT4G14940
		AT1G24267
		AT3G23870
		AT3G23900
		AT1G24340
		AT5G25080
		AT4G15165
		AT2G20050
		AT1G24440
		AT3G23990
		AT4G15233
		AT1G24540
		AT1G24570
		AT1G24610
		AT4G15310
		AT1G25097
		AT3G24350
		AT3G24360
		AT4G15540
		AT2G20610
		AT5G25520
		AT3G24460
		AT4G15560
		AT1G25375
		AT5G25580
		AT5G25590
		AT2G20805
		AT1G25500
		AT5G25820
		AT3G24660
		AT3G24670
		AT3G24760
		AT2G21100
		AT3G24840
		AT1G26240
		AT1G26260
		AT3G24880
		AT4G16090
		AT5G26080
		AT5G26090
		AT1G26370
		AT1G26380
		AT3G25060
		AT2G21350
		AT1G26440
		AT2G21380
		AT5G26200
		AT1G26500
		AT3G25160
		AT2G21450
		AT5G26240
		AT1G26710
		AT3G25490
		AT2G21600
		AT5G26340
		AT4G16370
		AT1G26761
		AT1G26762
		AT4G16380
		AT4G16390
		AT3G25510
		AT3G25570
		AT3G25572
		AT5G26710
		AT5G26700
		AT3G25610
		AT5G26690
		AT4G16530
		AT1G26910
		AT4G16570
		AT2G21920
		AT2G21930
		AT2G21940
		AT4G16660
		AT2G22120
		AT4G16730
		AT1G27150
		AT3G25855
		AT2G22270
		AT2G22290
		AT5G26940
		AT1G27360
		AT3G25990
		AT3G26000
		AT4G16915
		AT3G26040
		AT5G27100
		AT4G16950
		AT1G27470
		AT3G26115
		AT2G22490
		AT3G26140
		AT4G16990
		AT1G27540
		AT4G17050
		AT2G22600
		AT1G27600
		AT3G26250
		AT4G17210
		AT3G26370
		AT4G17230
		AT4G17280
		AT2G22795
		AT1G27850
		AT4G17360
		AT4G17370
		AT4G17380
		AT2G22830
		AT1G27940
		AT2G22890
		AT3G26560
		AT2G22930
		AT1G28040
		AT5G27650
		AT2G22990
		AT2G23050
		AT5G27720
		AT5G27730
		AT2G23080
		AT2G23090
		AT1G28180
		AT1G28200
		AT5G27820
		AT1G28230
		AT2G23190
		AT3G26850
		AT3G26900
		AT2G23310
		AT4G17840
		AT1G28320
		AT3G26934
		AT3G26990
		AT3G27000
		AT3G27020
		AT2G23420
		AT4G18030
		AT1G28510
		AT2G23540
		AT1G28540
		AT1G28590
		AT2G23660
		AT3G27310
		AT1G28920
		AT5G28120
[truncated: 1,681 more rows]

## Sheet: countchecks
G and SA	G not SA	SA not G	PSR overlappers		G and PSR not SA	G Only	SA and PSR not G	SA only	All 3	G and SA not PSR	PSR only
at1g07880	at1g01020	at1g01350	at1g01340		at1g01340	at1g01020	at1g08590	at1g01350	at1g17450	at1g07880	at1g01010
at1g11160	at1g01090	at1g01750	at1g05620		at1g05620	at1g01090	at1g13340	at1g01750	at1g22060	at1g11160	at1g01040
at1g17400	at1g01110	at1g02210	at1g06490		at1g06490	at1g01110	at1g13470	at1g02210	at1g47400	at1g17400	at1g02470
at1g17450	at1g01320	at1g03905	at1g09460		at1g09460	at1g01320	at1g17600	at1g03905	at1g62760	at1g19100	at1g02500
at1g19100	at1g01340	at1g04080	at1g11180		at1g11180	at1g01440	at1g26420	at1g04080	at1g67520	at1g27470	at1g02520
at1g22060	at1g01440	at1g04790	at1g11720		at1g11720	at1g01520	at1g36622	at1g04790	at3g17320	at1g28480	at1g02890
at1g27470	at1g01520	at1g06475	at1g12240		at1g12240	at1g01540	at1g43910	at1g06475	at3g29970	at1g30890	at1g03540
at1g28480	at1g01540	at1g06580	at1g16800		at1g16800	at1g01680	at1g45015	at1g06580	at4g08300	at1g32375	at1g03940
at1g30890	at1g01680	at1g06900	at1g20650		at1g20650	at1g01690	at1g47960	at1g06900	at4g08450	at1g32380	at1g04110
at1g32375	at1g01690	at1g08590	at1g20840		at1g20840	at1g01700	at1g55020	at1g08860	at4g08870	at1g36150	at1g05360
at1g32380	at1g01700	at1g08860	at1g20860		at1g20860	at1g01790	at1g61360	at1g08940	at5g15780	at1g36980	at1g06160
at1g36150	at1g01790	at1g08940	at1g21250		at1g21250	at1g01910	at1g67000	at1g09160	at5g46700	at1g43580	at1g07390
at1g36980	at1g01910	at1g09160	at1g21630		at1g21630	at1g02270	at1g80070	at1g11310	at5g67340	at1g43650	at1g08090
at1g43580	at1g02270	at1g11310	at1g21930		at1g21930	at1g02290	at2g04100	at1g12990		at1g44080	at1g08310
at1g43650	at1g02290	at1g12990	at1g24540		at1g24540	at1g02305	at2g04495	at1g14370		at1g44170	at1g08430
at1g44080	at1g02305	at1g13340	at1g24706		at1g24706	at1g02420	at2g04795	at1g15940		at1g52500	at1g12020
at1g44170	at1g02420	at1g13470	at1g26240		at1g26240	at1g02430	at2g05540	at1g16090		at1g58602	at1g12210
at1g47400	at1g02430	at1g14370	at1g26380		at1g26380	at1g02740	at2g05580	at1g16250		at1g59660	at1g12280
at1g52500	at1g02740	at1g15940	at1g28180		at1g28180	at1g02750	at2g10560	at1g16650		at1g65350	at1g12730
at1g58602	at1g02750	at1g16090	at1g32200		at1g32200	at1g02860	at2g11810	at1g16780		at1g66235	at1g16160
at1g59660	at1g02860	at1g16250	at1g32950		at1g32950	at1g02870	at2g12200	at1g18660		at1g66880	at1g16370
at1g62760	at1g02870	at1g16650	at1g50050		at1g50050	at1g02970	at2g14580	at1g18870		at1g67890	at1g16710
at1g65350	at1g02970	at1g16780	at1g50840		at1g50840	at1g02980	at2g18690	at1g19394		at1g76660	at1g17290
at1g66235	at1g02980	at1g17600	at1g52320		at1g52320	at1g03040	at2g24720	at1g20400		at2g05120	at1g17420
at1g66880	at1g03040	at1g18660	at1g54040		at1g54040	at1g03060	at2g26215	at1g21450		at2g05760	at1g19220
at1g67520	at1g03060	at1g18870	at1g55860		at1g55860	at1g03200	at2g29630	at1g24220		at2g06255	at1g19720
at1g67890	at1g03200	at1g19394	at1g57630		at1g57630	at1g03240	at2g32240	at1g24380		at2g07715	at1g20080
at1g76660	at1g03240	at1g20400	at1g57770		at1g57770	at1g03270	at3g14470	at1g24530		at2g13950	at1g20390
at2g05120	at1g03270	at1g21450	at1g61480		at1g61480	at1g03380	at3g15518	at1g28307		at2g14440	at1g21230
at2g05760	at1g03380	at1g24220	at1g61610		at1g61610	at1g03445	at3g21520	at1g28370		at2g15042	at1g21240
at2g06255	at1g03445	at1g24380	at1g62540		at1g62540	at1g03470	at3g23450	at1g29080		at2g17305	at1g21529
at2g07715	at1g03470	at1g24530	at1g62560		at1g62560	at1g03590	at3g28210	at1g29640		at2g17787	at1g21940
at2g13950	at1g03590	at1g26420	at1g66570		at1g66570	at1g03810	at3g42670	at1g29724		at2g22490	at1g22150
at2g14440	at1g03810	at1g28307	at1g67900		at1g67900	at1g04370	at3g63380	at1g30650		at2g22890	at1g24100
at2g15042	at1g04370	at1g28370	at1g67980		at1g67980	at1g04390	at4g04490	at1g30790		at2g25370	at1g24160
at2g17305	at1g04390	at1g29080	at1g68400		at1g68400	at1g04425	at4g04540	at1g32000		at2g25410	at1g26250
at2g17787	at1g04425	at1g29640	at1g71920		at1g71920	at1g04470	at4g15200	at1g32730		at2g26260	at1g26270
at2g22490	at1g04470	at1g29724	at1g74260		at1g74260	at1g04625	at4g16890	at1g32850		at2g34790	at1g26390
at2g22890	at1g04625	at1g30650	at1g74290		at1g74290	at1g04700	at4g25960	at1g33500		at2g41920	at1g26410
at2g25370	at1g04700	at1g30790	at1g74770		at1g74770	at1g04750	at4g38560	at1g33730		at2g44100	at1g27180
at2g25410	at1g04750	at1g32000	at1g76990		at1g76990	at1g04780	at5g02860	at1g33960		at3g01320	at1g29230
at2g26260	at1g04780	at1g32730	at2g03140		at2g03140	at1g04830	at5g17860	at1g34310		at3g03260	at1g29450
at2g34790	at1g04830	at1g32850	at2g07682		at2g07682	at1g04850	at5g19820	at1g34440		at3g11290	at1g29560
at2g41920	at1g04850	at1g33500	at2g07698		at2g07698	at1g04880	at5g27950	at1g34470		at3g16680	at1g30410
at2g44100	at1g04880	at1g33730	at2g07721		at2g07721	at1g04920	at5g38000	at1g35030		at3g18330	at1g30510
at3g01320	at1g04920	at1g33960	at2g14170		at2g14170	at1g04930	at5g47980	at1g35040		at3g24360	at1g30530
at3g03260	at1g04930	at1g34310	at2g16270		at2g16270	at1g04940	at5g52710	at1g35140		at3g28410	at1g30560
at3g11290	at1g04940	at1g34440	at2g18150		at2g18150	at1g04945	at5g54280	at1g35210		at3g29770	at1g30870
at3g16680	at1g04945	at1g34470	at2g18530		at2g18530	at1g04970		at1g35230		at3g30770	at1g31885
at3g17320	at1g04970	at1g35030	at2g22930		at2g22930	at1g05055		at1g35240		at3g43300	at1g32060
at3g18330	at1g05055	at1g35040	at2g23050		at2g23050	at1g05090		at1g35242		at3g44935	at1g32450
at3g24360	at1g05090	at1g35140	at2g24980		at2g24980	at1g05160		at1g35260		at3g45430	at1g32960
at3g28410	at1g05160	at1g35210	at2g25160		at2g25160	at1g05250		at1g35310		at3g45770	at1g32970
at3g29770	at1g05250	at1g35230	at2g26760		at2g26760	at1g05590		at1g35350		at3g46180	at1g33030
at3g29970	at1g05590	at1g35240	at2g33770		at2g33770	at1g05740		at1g35365		at3g47040	at1g33640
at3g30770	at1g05620	at1g35242	at2g36750		at2g36750	at1g05880		at1g35435		at3g48120	at1g34047
at3g43300	at1g05740	at1g35260	at2g39770		at2g39770	at1g05910		at1g35630		at3g48770	at1g34355
at3g44935	at1g05880	at1g35310	at3g02850		at3g02850	at1g05950		at1g35710		at3g51580	at1g35625
at3g45430	at1g05910	at1g35350	at3g05680		at3g05680	at1g06110		at1g35820		at3g52050	at1g35660
at3g45770	at1g05950	at1g35365	at3g07070		at3g07070	at1g06148		at1g35900		at3g59700	at1g36240
at3g46180	at1g06110	at1g35435	at3g08500		at3g08500	at1g06250		at1g36000		at3g63440	at1g37130
at3g47040	at1g06148	at1g35630	at3g09080		at3g09080	at1g06290		at1g36030		at4g00140	at1g43140
at3g48120	at1g06250	at1g35710	at3g09830		at3g09830	at1g06430		at1g36095		at4g00830	at1g44030
at3g48770	at1g06290	at1g35820	at3g11670		at3g11670	at1g06460		at1g36160		at4g03090	at1g44835
at3g51580	at1g06430	at1g35900	at3g14205		at3g14205	at1g06500		at1g36272		at4g04960	at1g48300
at3g52050	at1g06460	at1g36000	at3g14700		at3g14700	at1g06510		at1g36310		at4g10490	at1g49720
at3g59700	at1g06490	at1g36030	at3g16180		at3g16180	at1g06550		at1g36340		at4g10603	at1g49800
at3g63440	at1g06500	at1g36095	at3g18290		at3g18290	at1g06630		at1g36390		at4g10870	at1g49990
at4g00140	at1g06510	at1g36160	at3g21700		at3g21700	at1g06670		at1g36675		at4g11070	at1g50180
at4g00830	at1g06550	at1g36272	at3g21870		at3g21870	at1g06720		at1g36920		at4g11240	at1g50240
at4g03090	at1g06630	at1g36310	at3g24190		at3g24190	at1g06790		at1g36925		at4g12690	at1g50732
at4g04960	at1g06670	at1g36340	at3g25610		at3g25610	at1g06820		at1g37000		at4g14400	at1g51760
at4g08300	at1g06720	at1g36390	at3g27670		at3g27670	at1g07040		at1g38950		at4g15096	at1g51800
at4g08450	at1g06790	at1g36622	at3g43190		at3g43190	at1g07080		at1g40083		at4g23100	at1g52870
at4g08870	at1g06820	at1g36675	at3g45140		at3g45140	at1g07220		at1g41820		at4g23210	at1g52940
at4g10490	at1g07040	at1g36920	at3g47340		at3g47340	at1g07300		at1g42190		at4g23440	at1g53160
at4g10603	at1g07080	at1g36925	at3g48260		at3g48260	at1g07420		at1g42470		at4g24300	at1g53310
at4g10870	at1g07220	at1g37000	at3g49290		at3g49290	at1g07570		at1g42710		at4g25515	at1g53800
at4g11070	at1g07300	at1g38950	at3g49980		at3g49980	at1g07650		at1g42970		at4g30770	at1g54030
at4g11240	at1g07420	at1g40083	at3g51870		at3g51870	at1g07800		at1g43040		at4g32560	at1g54095
at4g12690	at1g07570	at1g41820	at3g54580		at3g54580	at1g07830		at1g43080		at4g34400	at1g55790
at4g14400	at1g07650	at1g42190	at3g54590		at3g54590	at1g07930		at1g43190		at5g01550	at1g58280
at4g15096	at1g07800	at1g42470	at3g59570		at3g59570	at1g07980		at1g43310		at5g02480	at1g60800
at4g23100	at1g07830	at1g42710	at4g01820		at4g01820	at1g08190		at1g43415		at5g09290	at1g61370
at4g23210	at1g07930	at1g42970	at4g02710		at4g02710	at1g08220		at1g43630		at5g15170	at1g61520
at4g23440	at1g07980	at1g43040	at4g03140		at4g03140	at1g08490		at1g43665		at5g16715	at1g61550
at4g24300	at1g08190	at1g43080	at4g03380		at4g03380	at1g08620		at1g43730		at5g18720	at1g61760
at4g25515	at1g08220	at1g43190	at4g04930		at4g04930	at1g08720		at1g43790		at5g24320	at1g61810
at4g30770	at1g08490	at1g43310	at4g05140		at4g05140	at1g08740		at1g43810		at5g26240	at1g62280
at4g32560	at1g08620	at1g43415	at4g05520		at4g05520	at1g08810		at1g44100		at5g28370	at1g62310
at4g34400	at1g08720	at1g43630	at4g10060		at4g10060	at1g08920		at1g44740		at5g28642	at1g62580
at5g01550	at1g08740	at1g43665	at4g13390		at4g13390	at1g09026		at1g44910		at5g33370	at1g63020
at5g02480	at1g08810	at1g43730	at4g15540		at4g15540	at1g09060		at1g45063		at5g34581	at1g63100
at5g09290	at1g08920	at1g43790	at4g15590		at4g15590	at1g09190		at1g46696		at5g34940	at1g63530
at5g15170	at1g09026	at1g43810	at4g16370		at4g16370	at1g09195		at1g46912		at5g35160	at1g63540
at5g15780	at1g09060	at1g43910	at4g16920		at4g16920	at1g09220		at1g47370		at5g35390	at1g63750
at5g16715	at1g09190	at1g44100	at4g17140		at4g17140	at1g09245		at1g47840		at5g38830	at1g64310
at5g18720	at1g09195	at1g44740	at4g20460		at4g20460	at1g09260		at1g47885		at5g39200	at1g64610
at5g24320	at1g09220	at1g44910	at4g30710		at4g30710	at1g09420		at1g48390		at5g39690	at1g64720
at5g26240	at1g09245	at1g45015	at4g36430		at4g36430	at1g09450		at1g48600		at5g44840	at1g64950
at5g28370	at1g09260	at1g45063	at4g37610		at4g37610	at1g09470		at1g48690		at5g48410	at1g65730
at5g28642	at1g09420	at1g46696	at5g04950		at5g04950	at1g09490		at1g49050		at5g48960	at1g66180
at5g33370	at1g09450	at1g46912	at5g04960		at5g04960	at1g09640		at1g49260		at5g49470	at1g66360
at5g34581	at1g09460	at1g47370	at5g05400		at5g05400	at1g09660		at1g49300		at5g51590	at1g67120
at5g34940	at1g09470	at1g47840	at5g06670		at5g06670	at1g09800		at1g49710		at5g51890	at1g67500
at5g35160	at1g09490	at1g47885	at5g09660		at5g09660	at1g09840		at1g50870		at5g52980	at1g67710
at5g35390	at1g09640	at1g47960	at5g13530		at5g13530	at1g09870		at1g51620		at5g59010	at1g67870
at5g38830	at1g09660	at1g48390	at5g13740		at5g13740	at1g10010		at1g51830		at5g59670	at1g68050
at5g39200	at1g09800	at1g48600	at5g24200		at5g24200	at1g10190		at1g52360		at5g65460	at1g68440
at5g39690	at1g09840	at1g48690	at5g26570		at5g26570	at1g10250		at1g52890			at1g68850
at5g44840	at1g09870	at1g49050	at5g26690		at5g26690	at1g10300		at1g52905			at1g69790
at5g46700	at1g10010	at1g49260	at5g27890		at5g27890	at1g10310		at1g53850			at1g70130
at5g48410	at1g10190	at1g49300	at5g28415		at5g28415	at1g10390		at1g54310			at1g70140
at5g48960	at1g10250	at1g49710	at5g37630		at5g37630	at1g10417		at1g55610			at1g70290
at5g49470	at1g10300	at1g50870	at5g37840		at5g37840	at1g10490		at1g56670			at1g70320
at5g51590	at1g10310	at1g51620	at5g38910		at5g38910	at1g10522		at1g58007			at1g70760
at5g51890	at1g10390	at1g51830	at5g40850		at5g40850	at1g10540		at1g58430			at1g71140
at5g52980	at1g10417	at1g52360	at5g41280		at5g41280	at1g10586		at1g59500			at1g72180
at5g59010	at1g10490	at1g52890	at5g41750		at5g41750	at1g10620		at1g59865			at1g72330
at5g59670	at1g10522	at1g52905	at5g41780		at5g41780	at1g10670		at1g60740			at1g72890
at5g65460	at1g10540	at1g53850	at5g42930		at5g42930	at1g10745		at1g60995			at1g73220
at5g67340	at1g10586	at1g54310	at5g45105		at5g45105	at1g10760		at1g61380			at1g73710
	at1g10620	at1g55020	at5g45380		at5g45380	at1g10820		at1g61420			at1g74100
	at1g10670	at1g55610	at5g46330		at5g46330	at1g10920		at1g61850			at1g74270
	at1g10745	at1g56670	at5g51150		at5g51150	at1g10940		at1g62225			at1g74580
	at1g10760	at1g58007	at5g53110		at5g53110	at1g10970		at1g62790			at1g74590
	at1g10820	at1g58430	at5g55250		at5g55250	at1g11050		at1g63290			at1g78020
	at1g10920	at1g59500	at5g57100		at5g57100	at1g11070		at1g63410			at1g78360
	at1g10940	at1g59865	at5g58940		at5g58940	at1g11265		at1g63480			at1g79280
	at1g10970	at1g60740	at5g63680		at5g63680	at1g11290		at1g64260			at1g79400
	at1g11050	at1g60995	at1g08590			at1g11300		at1g65486			at1g79710
	at1g11070	at1g61360	at1g13340			at1g11340		at1g65950			at1g80840
	at1g11180	at1g61380	at1g13470			at1g11350		at1g66070			at2g01530
	at1g11265	at1g61420	at1g17600			at1g11593		at1g66300			at2g01910
	at1g11290	at1g61850	at1g26420			at1g11785		at1g66310			at2g01918
	at1g11300	at1g62225	at1g36622			at1g11905		at1g66320			at2g01950
	at1g11340	at1g62790	at1g43910			at1g11910		at1g66640			at2g02120
	at1g11350	at1g63290	at1g45015			at1g11950		at1g66890			at2g02720
	at1g11593	at1g63410	at1g47960			at1g12050		at1g66920			at2g04040
	at1g11720	at1g63480	at1g55020			at1g12140		at1g67130			at2g04070
	at1g11785	at1g64260	at1g61360			at1g12150		at1g67290			at2g04400
	at1g11905	at1g65486	at1g67000			at1g12160		at1g67350			at2g04460
	at1g11910	at1g65950	at1g80070			at1g12300		at1g67540			at2g05520
	at1g11950	at1g66070	at2g04100			at1g12470		at1g67623			at2g05620
	at1g12050	at1g66300	at2g04495			at1g12480		at1g68640			at2g05632
	at1g12140	at1g66310	at2g04795			at1g12665		at1g69090			at2g05710
	at1g12150	at1g66320	at2g05540			at1g12840		at1g69960			at2g05790
	at1g12160	at1g66640	at2g05580			at1g12850		at1g70070			at2g07671
	at1g12240	at1g66890	at2g10560			at1g12880		at1g70790			at2g07673
	at1g12300	at1g66920	at2g11810			at1g12970		at1g72930			at2g07675
	at1g12470	at1g67000	at2g12200			at1g13030		at1g73180			at2g07676
	at1g12480	at1g67130	at2g14580			at1g13040		at1g73960			at2g07678
	at1g12665	at1g67290	at2g18690			at1g13270		at1g77680			at2g07687
	at1g12840	at1g67350	at2g24720			at1g13540		at1g78130			at2g07722
	at1g12850	at1g67540	at2g26215			at1g13560		at1g79500			at2g07751
	at1g12880	at1g67623	at2g29630			at1g13630		at1g79560			at2g07777
	at1g12970	at1g68640	at2g32240			at1g13730		at1g80280			at2g13540
	at1g13030	at1g69090	at3g14470			at1g13820		at1g80530			at2g14290
	at1g13040	at1g69960	at3g15518			at1g13970		at2g01021			at2g14760
	at1g13270	at1g70070	at3g21520			at1g13980		at2g01023			at2g14878
	at1g13540	at1g70790	at3g23450			at1g13990		at2g01310			at2g15020
	at1g13560	at1g72930	at3g28210			at1g14010		at2g01580			at2g15220
	at1g13630	at1g73180	at3g42670			at1g14030		at2g01600			at2g15780
	at1g13730	at1g73960	at3g63380			at1g14130		at2g01680			at2g15830
	at1g13820	at1g77680	at4g04490			at1g14140		at2g01870			at2g15880
	at1g13970	at1g78130	at4g04540			at1g14170		at2g02030			at2g15900
	at1g13980	at1g79500	at4g15200			at1g14190		at2g02490			at2g15960
	at1g13990	at1g79560	at4g16890			at1g14340		at2g02520			at2g15980
	at1g14010	at1g80070	at4g25960			at1g14360		at2g02955			at2g16140
	at1g14030	at1g80280	at4g38560			at1g14380		at2g03250			at2g16230
	at1g14130	at1g80530	at5g02860			at1g14390		at2g03330			at2g16430
	at1g14140	at2g01021	at5g17860			at1g14560		at2g03670			at2g16640
	at1g14170	at2g01023	at5g19820			at1g14650		at2g03840			at2g16676
	at1g14190	at2g01310	at5g27950			at1g14688		at2g03913			at2g16870
	at1g14340	at2g01580	at5g38000			at1g14690		at2g04020			at2g17033
	at1g14360	at2g01600	at5g47980			at1g14780		at2g04063			at2g17500
	at1g14380	at2g01680	at5g52710			at1g15010		at2g04305			at2g17525
	at1g14390	at2g01870	at5g54280			at1g15015		at2g04500			at2g17780
	at1g14560	at2g02030	at1g17450			at1g15150		at2g04740			at2g17930
	at1g14650	at2g02490	at1g22060			at1g15160		at2g04940			at2g18470
	at1g14688	at2g02520	at1g47400			at1g15215		at2g05210			at2g18660
	at1g14690	at2g02955	at1g62760			at1g15340		at2g05350			at2g18720
	at1g14780	at2g03250	at1g67520			at1g15560		at2g05370			at2g18760
	at1g15010	at2g03330	at3g17320			at1g15780		at2g05380			at2g19660
	at1g15015	at2g03670	at3g29970			at1g15860		at2g05420			at2g19900
	at1g15150	at2g03840	at4g08300			at1g15880		at2g05440			at2g20320
	at1g15160	at2g03913	at4g08450			at1g16070		at2g05920			at2g20560
	at1g15215	at2g04020	at4g08870			at1g16080		at2g06005			at2g21045
	at1g15340	at2g04063	at5g15780			at1g16240		at2g06050			at2g22070
	at1g15560	at2g04100	at5g46700			at1g16280		at2g06500			at2g22125
	at1g15780	at2g04305	at5g67340			at1g16290		at2g06541			at2g22470
	at1g15860	at2g04495				at1g16330		at2g06908			at2g22560
	at1g15880	at2g04500				at1g16520		at2g06925			at2g22770
	at1g16070	at2g04740				at1g16610		at2g07000			at2g22860
	at1g16080	at2g04795				at1g16670		at2g07040			at2g25680
	at1g16240	at2g04940				at1g16700		at2g07170			at2g25730
	at1g16280	at2g05210				at1g16750		at2g07310			at2g25900
	at1g16290	at2g05350				at1g16760		at2g07440			at2g26010
	at1g16330	at2g05370				at1g16830		at2g07521			at2g26150
	at1g16520	at2g05380				at1g16858		at2g07560			at2g26560
	at1g16610	at2g05420				at1g16860		at2g07680			at2g26660
	at1g16670	at2g05440				at1g16980		at2g07689			at2g28190
	at1g16700	at2g05540				at1g17000		at2g07724			at2g28250
	at1g16750	at2g05580				at1g17050		at2g07732			at2g28470
	at1g16760	at2g05920				at1g17070		at2g07734			at2g29940
	at1g16800	at2g06005				at1g17130		at2g07738			at2g30600
	at1g16830	at2g06050				at1g17150		at2g07739			at2g31960
	at1g16858	at2g06500				at1g17220		at2g07750			at2g31970
	at1g16860	at2g06541				at1g17240		at2g07768			at2g32400
	at1g16980	at2g06908				at1g17280		at2g07827			at2g32500
	at1g17000	at2g06925				at1g17350		at2g09388			at2g34100
	at1g17050	at2g07000				at1g17370		at2g09838			at2g34210
	at1g17070	at2g07040				at1g17550		at2g09970			at2g34290
	at1g17130	at2g07170				at1g17580		at2g10020			at2g34600
	at1g17150	at2g07310				at1g17640		at2g10440			at2g34710
	at1g17220	at2g07440				at1g17720		at2g10940			at2g35920
	at1g17240	at2g07521				at1g17745		at2g10965			at2g36530
	at1g17280	at2g07560				at1g17750		at2g11271			at2g36724
	at1g17350	at2g07680				at1g17760		at2g11520			at2g36730
	at1g17370	at2g07689				at1g17790		at2g11890			at2g38250
	at1g17550	at2g07724				at1g17820		at2g12290			at2g38440
	at1g17580	at2g07732				at1g17840		at2g12405			at2g38823
	at1g17640	at2g07734				at1g17870		at2g12465			at2g39730
	at1g17720	at2g07738				at1g17890		at2g12557			at2g40180
	at1g17745	at2g07739				at1g17920		at2g12875			at2g41730
	at1g17750	at2g07750				at1g17970		at2g12905			at2g42980
	at1g17760	at2g07768				at1g17990		at2g12940			at2g43880
	at1g17790	at2g07827				at1g18010		at2g12945			at2g45920
	at1g17820	at2g09388				at1g18040		at2g13100			at2g46530
	at1g17840	at2g09838				at1g18090		at2g13272			at2g46740
	at1g17870	at2g09970				at1g18130		at2g13500			at2g47000
	at1g17890	at2g10020				at1g18180		at2g13770			at2g47020
	at1g17920	at2g10440				at1g18270		at2g13790			at2g47275
	at1g17970	at2g10560				at1g18310		at2g13960			at2g47950
	at1g17990	at2g10940				at1g18360		at2g14060			at3g01310
	at1g18010	at2g10965				at1g18370		at2g14110			at3g01345
	at1g18040	at2g11271				at1g18410		at2g14160			at3g01480
	at1g18090	at2g11520				at1g18470		at2g14365			at3g02260
	at1g18130	at2g11810				at1g18490		at2g14560			at3g03640
	at1g18180	at2g11890				at1g18540		at2g14610			at3g03790
	at1g18270	at2g12200				at1g18550		at2g14660			at3g04050
	at1g18310	at2g12290				at1g18560		at2g14720			at3g04340
	at1g18360	at2g12405				at1g18610		at2g15110			at3g04450
	at1g18370	at2g12465				at1g18810		at2g15130			at3g05340
	at1g18410	at2g12557				at1g18900		at2g15300			at3g05630
	at1g18470	at2g12875				at1g19140		at2g15440			at3g05690
	at1g18490	at2g12905				at1g19170		at2g15535			at3g06290
	at1g18540	at2g12940				at1g19230		at2g15630			at3g06530
	at1g18550	at2g12945				at1g19240		at2g15790			at3g07160
	at1g18560	at2g13100				at1g19270		at2g16015			at3g08720
	at1g18610	at2g13272				at1g19310		at2g16030			at3g09162
	at1g18810	at2g13500				at1g19410		at2g16190			at3g09270
	at1g18900	at2g13770				at1g19450		at2g16668			at3g09910
	at1g19140	at2g13790				at1g19485		at2g17890			at3g10320
	at1g19170	at2g13960				at1g19520		at2g18520			at3g10710
	at1g19230	at2g14060				at1g19550		at2g19090			at3g11570
	at1g19240	at2g14110				at1g19600		at2g19960			at3g11964
	at1g19270	at2g14160				at1g19650		at2g20010			at3g13065
	at1g19310	at2g14365				at1g19835		at2g20613			at3g13100
	at1g19410	at2g14560				at1g19940		at2g20820			at3g14270
	at1g19450	at2g14580				at1g20010		at2g21040			at3g14460
	at1g19485	at2g14610				at1g20060		at2g21270			at3g14630
	at1g19520	at2g14660				at1g20110		at2g22970			at3g14720
	at1g19550	at2g14720				at1g20200		at2g23200			at3g14730
	at1g19600	at2g15110				at1g20460		at2g23390			at3g17190
	at1g19650	at2g15130				at1g20560		at2g24120			at3g17690
	at1g19835	at2g15300				at1g20570		at2g24990			at3g18840
	at1g19940	at2g15440				at1g20640		at2g25800			at3g18845
	at1g20010	at2g15535				at1g20670		at2g26140			at3g19970
	at1g20060	at2g15630				at1g20750		at2g26600			at3g20660
	at1g20110	at2g15790				at1g20967		at2g27610			at3g21090
	at1g20200	at2g16015				at1g20980		at2g27990			at3g22142
	at1g20460	at2g16030				at1g21330		at2g28755			at3g22150
	at1g20560	at2g16190				at1g21410		at2g29890			at3g22275
	at1g20570	at2g16668				at1g21600		at2g30130			at3g22850
	at1g20640	at2g17890				at1g21650		at2g30200			at3g25690
	at1g20650	at2g18520				at1g21780		at2g31360			at3g26030
	at1g20670	at2g18690				at1g21810		at2g31830			at3g26090
	at1g20750	at2g19090				at1g21835		at2g31890			at3g26310
	at1g20840	at2g19960				at1g21870		at2g33760			at3g26490
	at1g20860	at2g20010				at1g22120		at2g34120			at3g26614
	at1g20967	at2g20613				at1g22200		at2g34680			at3g26840
	at1g20980	at2g20820				at1g22240		at2g35120			at3g27170
	at1g21250	at2g21040				at1g22250		at2g35280			at3g27870
	at1g21330	at2g21270				at1g22460		at2g35610			at3g28690
	at1g21410	at2g22970				at1g22580		at2g35890			at3g28930
	at1g21600	at2g23200				at1g22620		at2g36490			at3g30340
	at1g21630	at2g23390				at1g22651		at2g36700			at3g42640
	at1g21650	at2g24120				at1g22670		at2g38070			at3g43110
	at1g21780	at2g24720				at1g22750		at2g39140			at3g43250
	at1g21810	at2g24990				at1g22760		at2g39180			at3g44510
	at1g21835	at2g25800				at1g22882		at2g40116			at3g44755
	at1g21870	at2g26140				at1g22950		at2g41390			at3g45070
	at1g21930	at2g26215				at1g22970		at2g41460			at3g45330
	at1g22120	at2g26600				at1g23030		at2g41500			at3g45720
	at1g22200	at2g27610				at1g23230		at2g44240			at3g46240
	at1g22240	at2g27990				at1g23260		at2g45100			at3g46330
	at1g22250	at2g28755				at1g23340		at2g45900			at3g46490
	at1g22460	at2g29630				at1g23360		at2g47250			at3g46600
	at1g22580	at2g29890				at1g23460		at3g01175			at3g47110
	at1g22620	at2g30130				at1g23510		at3g01540			at3g47420
	at1g22651	at2g30200				at1g23670		at3g03470			at3g47480
	at1g22670	at2g31360				at1g23700		at3g04220			at3g47930
	at1g22750	at2g31830				at1g23720		at3g04380			at3g48290
	at1g22760	at2g31890				at1g23820		at3g05440			at3g48300
	at1g22882	at2g32240				at1g23890		at3g05540			at3g48420
	at1g22950	at2g33760				at1g23935		at3g09390			at3g50370
	at1g22970	at2g34120				at1g23950		at3g10180			at3g51970
	at1g23030	at2g34680				at1g23990		at3g11980			at3g52490
	at1g23230	at2g35120				at1g24068		at3g13210			at3g53150
	at1g23260	at2g35280				at1g24095		at3g13750			at3g53360
	at1g23340	at2g35610				at1g24210		at3g14610			at3g53620
	at1g23360	at2g35890				at1g24267		at3g14670			at3g53680
	at1g23460	at2g36490				at1g24340		at3g15390			at3g54670
	at1g23510	at2g36700				at1g24440		at3g17400			at3g54700
	at1g23670	at2g38070				at1g24460		at3g19350			at3g54770
	at1g23700	at2g39140				at1g24570		at3g20950			at3g55160
	at1g23720	at2g39180				at1g24610		at3g21295			at3g55980
	at1g23820	at2g40116				at1g24764		at3g21300			at3g56000
	at1g23890	at2g41390				at1g24822		at3g21490			at3g56040
	at1g23935	at2g41460				at1g24851		at3g21900			at3g57240
	at1g23950	at2g41500				at1g24880		at3g22230			at3g58810
	at1g23990	at2g44240				at1g25054		at3g22400			at3g59140
	at1g24068	at2g45100				at1g25097		at3g22600			at3g59884
	at1g24095	at2g45900				at1g25098		at3g22790			at3g60530
	at1g24210	at2g47250				at1g25211		at3g22968			at3g60840
	at1g24267	at3g01175				at1g25220		at3g23920			at3g61990
	at1g24340	at3g01540				at1g25260		at3g24340			at3g62590
	at1g24440	at3g03470				at1g25375		at3g26210			at3g63070
	at1g24460	at3g04220				at1g25500		at3g26480			at4g00450
	at1g24540	at3g04380				at1g25540		at3g26510			at4g00500
	at1g24570	at3g05440				at1g26208		at3g26860			at4g00900
	at1g24610	at3g05540				at1g26260		at3g27180			at4g00910
	at1g24706	at3g09390				at1g26370		at3g27190			at4g01330
	at1g24764	at3g10180				at1g26440		at3g27530			at4g01350
	at1g24822	at3g11980				at1g26500		at3g27890			at4g01470
	at1g24851	at3g13210				at1g26530		at3g28020			at4g01700
	at1g24880	at3g13750				at1g26540		at3g28155			at4g02050
	at1g25054	at3g14470				at1g26610		at3g28390			at4g02320
	at1g25097	at3g14610				at1g26640		at3g28510			at4g02660
	at1g25098	at3g14670				at1g26680		at3g28530			at4g03100
	at1g25211	at3g15390				at1g26690		at3g28540			at4g04330
	at1g25220	at3g15518				at1g26710		at3g28820			at4g04510
	at1g25260	at3g17400				at1g26761		at3g28918			at4g04610
	at1g25375	at3g19350				at1g26762		at3g28960			at4g04990
	at1g25500	at3g20950				at1g26910		at3g29010			at4g05631
	at1g25540	at3g21295				at1g26940		at3g29075			at4g07400
	at1g26208	at3g21300				at1g27110		at3g29080			at4g08290
	at1g26240	at3g21490				at1g27150		at3g29255			at4g08390
	at1g26260	at3g21520				at1g27170		at3g29580			at4g08480
	at1g26370	at3g21900				at1g27220		at3g29590			at4g08920
	at1g26380	at3g22230				at1g27360		at3g29638			at4g09030
	at1g26440	at3g22400				at1g27410		at3g29720			at4g09600
	at1g26500	at3g22600				at1g27430		at3g29760			at4g09680
	at1g26530	at3g22790				at1g27480		at3g29780			at4g09780
	at1g26540	at3g22968				at1g27540		at3g29790			at4g10260
	at1g26610	at3g23450				at1g27600		at3g29810			at4g10340
	at1g26640	at3g23920				at1g27770		at3g30210			at4g10500
	at1g26680	at3g24340				at1g27850		at3g30220			at4g10720
	at1g26690	at3g26210				at1g27940		at3g30430			at4g11110
	at1g26710	at3g26480				at1g28000		at3g30520			at4g12120
	at1g26761	at3g26510				at1g28040		at3g30778			at4g13690
	at1g26762	at3g26860				at1g28200		at3g30805			at4g14090
	at1g26910	at3g27180				at1g28230		at3g30845			at4g14140
	at1g26940	at3g27190				at1g28270		at3g31350			at4g14368
	at1g27110	at3g27530				at1g28304		at3g31400			at4g14760
	at1g27150	at3g27890				at1g28320		at3g31402			at4g15120
	at1g27170	at3g28020				at1g28323		at3g31900			at4g15180
	at1g27220	at3g28155				at1g28465		at3g31950			at4g15270
	at1g27360	at3g28210				at1g28510		at3g32036			at4g15990
	at1g27410	at3g28390				at1g28540		at3g32047			at4g16008
	at1g27430	at3g28510				at1g28590		at3g32050			at4g16340
	at1g27480	at3g28530				at1g28630		at3g32052			at4g16480
	at1g27540	at3g28540				at1g28920		at3g32090			at4g16900
	at1g27600	at3g28820				at1g28960		at3g32180			at4g17460
	at1g27770	at3g28918				at1g29050		at3g32260			at4g18120
	at1g27850	at3g28960				at1g29150		at3g32330			at4g18250
	at1g27940	at3g29010				at1g29400		at3g32410			at4g18600
	at1g28000	at3g29075				at1g29440		at3g33187			at4g19020
	at1g28040	at3g29080				at1g29590		at3g33293			at4g19530
	at1g28180	at3g29255				at1g29650		at3g33520			at4g19980
	at1g28200	at3g29580				at1g29740		at3g42050			at4g20210
	at1g28230	at3g29590				at1g29750		at3g42310			at4g20362
	at1g28270	at3g29638				at1g29770		at3g42385			at4g20430
	at1g28304	at3g29720				at1g29830		at3g42723			at4g20820
	at1g28320	at3g29760				at1g29940		at3g42728			at4g21250
	at1g28323	at3g29780				at1g30110		at3g42780			at4g21390
	at1g28465	at3g29790				at1g30120		at3g42990			at4g21470
	at1g28510	at3g29810				at1g30240		at3g43120			at4g21760
	at1g28540	at3g30210				at1g30300		at3g43150			at4g22217
	at1g28590	at3g30220				at1g30490		at3g43160			at4g22460
	at1g28630	at3g30430				at1g30550		at3g43340			at4g22470
	at1g28920	at3g30520				at1g30820		at3g43540			at4g23000
	at1g28960	at3g30778				at1g30845		at3g43750			at4g23600
	at1g29050	at3g30805				at1g31030		at3g43870			at4g23700
	at1g29150	at3g30845				at1g31090		at3g44100			at4g23920
	at1g29400	at3g31350				at1g31210		at3g44180			at4g25560
	at1g29440	at3g31400				at1g31260		at3g44200			at4g25640
	at1g29590	at3g31402				at1g31280		at3g44210			at4g26320
	at1g29650	at3g31900				at1g31360		at3g44235			at4g26680
	at1g29740	at3g31950				at1g31540		at3g44261			at4g27030
	at1g29750	at3g32036				at1g31630		at3g44600			at4g27850
	at1g29770	at3g32047				at1g31640		at3g44704			at4g28410
	at1g29830	at3g32050				at1g31730		at3g44800			at4g28490
	at1g29940	at3g32052				at1g31750		at3g44830			at4g28930
	at1g30110	at3g32090				at1g31830		at3g45020			at4g30110
	at1g30120	at3g32180				at1g31850		at3g45190			at4g31210
	at1g30240	at3g32260				at1g31880		at3g45210			at4g32250
	at1g30300	at3g32330				at1g31970		at3g45450			at4g32850
	at1g30490	at3g32410				at1g32020		at3g45670			at4g33030
	at1g30550	at3g33187				at1g32050		at3g46000			at4g33770
	at1g30820	at3g33293				at1g32120		at3g46620			at4g34200
	at1g30845	at3g33520				at1g32140		at3g46710			at4g34730
	at1g31030	at3g42050				at1g32270		at3g46904			at4g35090
	at1g31090	at3g42310				at1g32350		at3g46970			at4g36140
	at1g31210	at3g42385				at1g32430		at3g47300			at4g36470
	at1g31260	at3g42670				at1g32490		at3g47470			at4g37370
	at1g31280	at3g42723				at1g32500		at3g47540			at4g37590
	at1g31360	at3g42728				at1g32550		at3g49140			at4g37670
	at1g31540	at3g42780				at1g32585		at3g49330			at4g37680
	at1g31630	at3g42990				at1g32590		at3g49500			at4g37710
	at1g31640	at3g43120				at1g32700		at3g50470			at4g38340
	at1g31730	at3g43150				at1g32790		at3g50480			at4g39210
	at1g31750	at3g43160				at1g32810		at3g50620			at4g39640
	at1g31830	at3g43340				at1g33070		at3g52170			at4g39675
	at1g31850	at3g43540				at1g33100		at3g54190			at4g39980
	at1g31880	at3g43750				at1g33200		at3g55410			at5g01180
	at1g31970	at3g43870				at1g33340		at3g55430			at5g01360
	at1g32020	at3g44100				at1g33360		at3g56960			at5g02180
	at1g32050	at3g44180				at1g33370		at3g57090			at5g02310
	at1g32120	at3g44200				at1g33390		at3g57880			at5g04230
	at1g32140	at3g44210				at1g33550		at3g60050			at5g05730
	at1g32200	at3g44235				at1g33720		at3g60180			at5g06640
	at1g32270	at3g44261				at1g33855		at3g60960			at5g06905
	at1g32350	at3g44600				at1g33890		at3g62030			at5g07570
	at1g32430	at3g44704				at1g33900		at4g00170			at5g10340
	at1g32490	at3g44800				at1g33910		at4g00380			at5g10800
	at1g32500	at3g44830				at1g33970		at4g00700			at5g13010
	at1g32550	at3g45020				at1g33990		at4g00770			at5g13320
	at1g32585	at3g45190				at1g34120		at4g01460			at5g13770
	at1g32590	at3g45210				at1g34220		at4g01516			at5g14020
	at1g32700	at3g45450				at1g34230		at4g01520			at5g14120
	at1g32790	at3g45670				at1g34250		at4g02390			at5g14550
	at1g32810	at3g46000				at1g34315		at4g02520			at5g14780
	at1g32950	at3g46620				at1g34390		at4g02750			at5g14880
	at1g33070	at3g46710				at1g34392		at4g03110			at5g15070
	at1g33100	at3g46904				at1g34550		at4g03190			at5g15360
	at1g33200	at3g46970				at1g34580		at4g03565			at5g15480
	at1g33340	at3g47300				at1g34620		at4g03570			at5g17165
	at1g33360	at3g47470				at1g34650		at4g03827			at5g17390
	at1g33370	at3g47540				at1g35130		at4g03830			at5g18030
	at1g33390	at3g49140				at1g35220		at4g03950			at5g19740
	at1g33550	at3g49330				at1g35280		at4g04110			at5g20280
	at1g33720	at3g49500				at1g35320		at4g04450			at5g20410
	at1g33855	at3g50470				at1g35430		at4g04460			at5g20610
	at1g33890	at3g50480				at1g35460		at4g04601			at5g20790
	at1g33900	at3g50620				at1g35490		at4g04650			at5g20960
	at1g33910	at3g52170				at1g35515		at4g05080			at5g22300
	at1g33970	at3g54190				at1g35530		at4g05360			at5g23950
	at1g33990	at3g55410				at1g35545		at4g05370			at5g24155
	at1g34120	at3g55430				at1g35620		at4g05620			at5g24350
	at1g34220	at3g56960				at1g35670		at4g05632			at5g24380
	at1g34230	at3g57090				at1g35690		at4g06479			at5g24920
	at1g34250	at3g57880				at1g35930		at4g06490			at5g25040
	at1g34315	at3g60050				at1g36140		at4g06536			at5g25250
	at1g34390	at3g60180				at1g36590		at4g06599			at5g25260
	at1g34392	at3g60960				at1g36630		at4g06639			at5g25930
	at1g34550	at3g62030				at1g37150		at4g06688			at5g26270
	at1g34580	at3g63380				at1g38213		at4g06740			at5g26280
	at1g34620	at4g00170				at1g38214		at4g06746			at5g26670
	at1g34650	at4g00380				at1g38215		at4g07524			at5g26730
	at1g35130	at4g00700				at1g38216		at4g07526			at5g27600
	at1g35220	at4g00770				at1g38217		at4g07675			at5g27845
	at1g35280	at4g01460				at1g38218		at4g07868			at5g28080
	at1g35320	at4g01516				at1g38219		at4g07932			at5g28262
	at1g35430	at4g01520				at1g38220		at4g07990			at5g28630
	at1g35460	at4g02390				at1g38221		at4g08025			at5g28840
	at1g35490	at4g02520				at1g38222		at4g08073			at5g35050
	at1g35515	at4g02750				at1g38223		at4g08140			at5g35170
	at1g35530	at4g03110				at1g38224		at4g08190			at5g35407
	at1g35545	at4g03190				at1g38225		at4g08263			at5g35425
	at1g35620	at4g03565				at1g38226		at4g08267			at5g36120
	at1g35670	at4g03570				at1g38227		at4g08350			at5g37010
	at1g35690	at4g03827				at1g38228		at4g08470			at5g37130
	at1g35930	at4g03830				at1g38229		at4g08500			at5g39050
	at1g36140	at4g03950				at1g38230		at4g08593			at5g39110
	at1g36590	at4g04110				at1g38231		at4g08620			at5g39190
	at1g36630	at4g04450				at1g38232		at4g08670			at5g40820
	at1g37150	at4g04460				at1g38233		at4g08685			at5g42400
	at1g38213	at4g04490				at1g38234		at4g08691			at5g43350
	at1g38214	at4g04540				at1g38235		at4g08700			at5g44410
	at1g38215	at4g04601				at1g38236		at4g08850			at5g44530
	at1g38216	at4g04650				at1g38237		at4g08895			at5g44578
	at1g38217	at4g05080				at1g38238		at4g08910			at5g45000
	at1g38218	at4g05360				at1g38239		at4g08940			at5g45230
	at1g38219	at4g05370				at1g38240		at4g09587			at5g45720
	at1g38220	at4g05620				at1g38241		at4g10150			at5g46450
	at1g38221	at4g05632				at1g38242		at4g10160			at5g46460
	at1g38222	at4g06479				at1g38243		at4g10210			at5g47820
	at1g38223	at4g06490				at1g38244		at4g10380			at5g49152
	at1g38224	at4g06536				at1g38245		at4g10620			at5g52100
	at1g38225	at4g06599				at1g38246		at4g10695			at5g52700
	at1g38226	at4g06639				at1g38247		at4g10850			at5g52790
	at1g38227	at4g06688				at1g38248		at4g11170			at5g52920
	at1g38228	at4g06740				at1g38249		at4g11230			at5g53048
	at1g38229	at4g06746				at1g38250		at4g11670			at5g54810
	at1g38230	at4g07524				at1g38251		at4g11790			at5g55410
	at1g38231	at4g07526				at1g38252		at4g12230			at5g55820
	at1g38232	at4g07675				at1g38253		at4g12420			at5g56630
	at1g38233	at4g07868				at1g38254		at4g12430			at5g57180
	at1g38234	at4g07932				at1g38255		at4g12810			at5g57610
	at1g38235	at4g07990				at1g38256		at4g13420			at5g58620
	at1g38236	at4g08025				at1g38257		at4g13820			at5g59070
	at1g38237	at4g08073				at1g38258		at4g13890			at5g59650
	at1g38238	at4g08140				at1g38259		at4g13920			at5g63780
	at1g38239	at4g08190				at1g38260		at4g14980			at5g63920
	at1g38240	at4g08263				at1g39510		at4g15890			at5g64000
	at1g38241	at4g08267				at1g39590		at4g16015			at5g64390
	at1g38242	at4g08350				at1g40080		at4g16960			at5g66520
	at1g38243	at4g08470				at1g40095		at4g17453			at5g66760
	at1g38244	at4g08500				at1g40118		at4g17590			at5g67385
	at1g38245	at4g08593				at1g40137		at4g17713
	at1g38246	at4g08620				at1g41650		at4g17810
	at1g38247	at4g08670				at1g41660		at4g17870
	at1g38248	at4g08685				at1g42560		at4g18150
	at1g38249	at4g08691				at1g42980		at4g18375
	at1g38250	at4g08700				at1g43245		at4g18470
	at1g38251	at4g08850				at1g43620		at4g19130
	at1g38252	at4g08895				at1g43670		at4g19900
	at1g38253	at4g08910				at1g43850		at4g20170
	at1g38254	at4g08940				at1g44000		at4g20480
	at1g38255	at4g09587				at1g44085		at4g21030
	at1g38256	at4g10150				at1g44820		at4g21670
	at1g38257	at4g10160				at1g44875		at4g22590
	at1g38258	at4g10210				at1g45120		at4g23060
	at1g38259	at4g10380				at1g45221		at4g23130
	at1g38260	at4g10620				at1g46120		at4g23150
	at1g39510	at4g10695				at1g46624		at4g23340
	at1g39590	at4g10850				at1g47210		at4g24680
	at1g40080	at4g11170				at1g47230		at4g25020
	at1g40095	at4g11230				at1g47270		at4g26350
	at1g40118	at4g11670				at1g47290		at4g26600
	at1g40137	at4g11790				at1g47380		at4g27370
	at1g41650	at4g12230				at1g47500		at4g28010
	at1g41660	at4g12420				at1g47530		at4g28980
	at1g42560	at4g12430				at1g47550		at4g29890
	at1g42980	at4g12810				at1g47640		at4g30130
	at1g43245	at4g13420				at1g47650		at4g30150
	at1g43620	at4g13820				at1g47710		at4g31780
	at1g43670	at4g13890				at1g47770		at4g31800
	at1g43850	at4g13920				at1g47860		at4g32295
	at1g44000	at4g14980				at1g47890		at4g32375
	at1g44085	at4g15200				at1g48095		at4g32870
	at1g44820	at4g15890				at1g48110		at4g33050
	at1g44875	at4g16015				at1g48200		at4g33300
	at1g45120	at4g16890				at1g48310		at4g35770
	at1g45221	at4g16960				at1g48400		at4g37830
	at1g46120	at4g17453				at1g48770		at4g38050
	at1g46624	at4g17590				at1g48810		at4g38550
	at1g47210	at4g17713				at1g48820		at4g39120
	at1g47230	at4g17810				at1g48830		at5g01730
	at1g47270	at4g17870				at1g48900		at5g02030
	at1g47290	at4g18150				at1g49005		at5g04130
	at1g47380	at4g18375				at1g49170		at5g04260
	at1g47500	at4g18470				at1g49180		at5g04780
	at1g47530	at4g19130				at1g49190		at5g06050
	at1g47550	at4g19900				at1g49270		at5g07400
	at1g47640	at4g20170				at1g49320		at5g07410
	at1g47650	at4g20480				at1g49500		at5g08020
	at1g47710	at4g21030				at1g49510		at5g09860
	at1g47770	at4g21670				at1g49670		at5g11680
	at1g47860	at4g22590				at1g49770		at5g11880
	at1g47890	at4g23060				at1g49790		at5g13310
	at1g48095	at4g23130				at1g50090		at5g13680
	at1g48110	at4g23150				at1g50160		at5g14260
	at1g48200	at4g23340				at1g50190		at5g14610
	at1g48310	at4g24680				at1g50220		at5g15630
	at1g48400	at4g25020				at1g50250		at5g16270
	at1g48770	at4g25960				at1g50400		at5g17160
	at1g48810	at4g26350				at1g50580		at5g17790
	at1g48820	at4g26600				at1g50590		at5g18570
	at1g48830	at4g27370				at1g50670		at5g18840
	at1g48900	at4g28010				at1g50710		at5g19160
	at1g49005	at4g28980				at1g50970		at5g19240
	at1g49170	at4g29890				at1g51080		at5g19610
	at1g49180	at4g30130				at1g51110		at5g20050
	at1g49190	at4g30150				at1g51160		at5g22520
	at1g49270	at4g31780				at1g51200		at5g22560
	at1g49320	at4g31800				at1g51210		at5g22608
	at1g49500	at4g32295				at1g51340		at5g23010
	at1g49510	at4g32375				at1g51370		at5g23380
	at1g49670	at4g32870				at1g51510		at5g23720
	at1g49770	at4g33050				at1g51538		at5g24210
	at1g49790	at4g33300				at1g51600		at5g24370
	at1g50050	at4g35770				at1g51610		at5g24520
	at1g50090	at4g37830				at1g51630		at5g24780
	at1g50160	at4g38050				at1g51720		at5g25880
	at1g50190	at4g38550				at1g51730		at5g26040
	at1g50220	at4g38560				at1g51740		at5g26170
	at1g50250	at4g39120				at1g51745		at5g26600
	at1g50400	at5g01730				at1g51805		at5g26610
	at1g50580	at5g02030				at1g51810		at5g26840
	at1g50590	at5g02860				at1g51860		at5g26848
	at1g50670	at5g04130				at1g51910		at5g27220
	at1g50710	at5g04260				at1g52110		at5g27247
	at1g50840	at5g04780				at1g52150		at5g27280
	at1g50970	at5g06050				at1g52180		at5g27440
	at1g51080	at5g07400				at1g52340		at5g27570
	at1g51110	at5g07410				at1g52343		at5g27606
	at1g51160	at5g08020				at1g52415		at5g27680
	at1g51200	at5g09860				at1g52510		at5g27944
	at1g51210	at5g11680				at1g52610		at5g28040
	at1g51340	at5g11880				at1g52640		at5g28090
	at1g51370	at5g13310				at1g52660		at5g28150
	at1g51510	at5g13680				at1g52670		at5g28410
	at1g51538	at5g14260				at1g52990		at5g28465
	at1g51600	at5g14610				at1g53110		at5g28491
	at1g51610	at5g15630				at1g53140		at5g28520
	at1g51630	at5g16270				at1g53265		at5g28821
	at1g51720	at5g17160				at1g53390		at5g28885
	at1g51730	at5g17790				at1g53400		at5g28931
	at1g51740	at5g17860				at1g53410		at5g29231
	at1g51745	at5g18570				at1g53420		at5g29560
	at1g51805	at5g18840				at1g53550		at5g29807
	at1g51810	at5g19160				at1g53580		at5g30510
	at1g51860	at5g19240				at1g53640		at5g31412
	at1g51910	at5g19610				at1g53705		at5g32590
	at1g52110	at5g19820				at1g53720		at5g32597
	at1g52150	at5g20050				at1g53760		at5g32613
	at1g52180	at5g22520				at1g53790		at5g33355
	at1g52320	at5g22560				at1g53840		at5g33393
	at1g52340	at5g22608				at1g54060		at5g33421
	at1g52343	at5g23010				at1g54115		at5g33806
	at1g52415	at5g23380				at1g54220		at5g34829
	at1g52510	at5g23720				at1g54320		at5g34850
	at1g52610	at5g24210				at1g54470		at5g34882
	at1g52640	at5g24370				at1g54490		at5g34930
	at1g52660	at5g24520				at1g54510		at5g35069
	at1g52670	at5g24780				at1g54560		at5g35338
	at1g52990	at5g25880				at1g54610		at5g35360
	at1g53110	at5g26040				at1g54700		at5g35450
	at1g53140	at5g26170				at1g54710		at5g35490
	at1g53265	at5g26600				at1g54790		at5g35603
	at1g53390	at5g26610				at1g54840		at5g35770
	at1g53400	at5g26840				at1g54940		at5g35920
	at1g53410	at5g26848				at1g54990		at5g35940
	at1g53420	at5g27220				at1g55050		at5g36080
	at1g53550	at5g27247				at1g55120		at5g36280
	at1g53580	at5g27280				at1g55220		at5g36300
	at1g53640	at5g27440				at1g55230		at5g36480
	at1g53705	at5g27570				at1g55270		at5g36890
	at1g53720	at5g27606				at1g55400		at5g37610
	at1g53760	at5g27680				at1g55490		at5g37667
	at1g53790	at5g27944				at1g55530		at5g37770
	at1g53840	at5g27950				at1g55710		at5g37790
	at1g54040	at5g28040				at1g55750		at5g38010
	at1g54060	at5g28090				at1g55940		at5g38040
	at1g54115	at5g28150				at1g56140		at5g38190
	at1g54220	at5g28410				at1g56160		at5g38210
	at1g54320	at5g28465				at1g56165		at5g38250
	at1g54470	at5g28491				at1g56260		at5g38344
	at1g54490	at5g28520				at1g56290		at5g38450
	at1g54510	at5g28821				at1g56310		at5g38550
	at1g54560	at5g28885				at1g56340		at5g38560
	at1g54610	at5g28931				at1g56430		at5g38710
	at1g54700	at5g29231				at1g56510		at5g38860
	at1g54710	at5g29560				at1g56530		at5g39670
	at1g54790	at5g29807				at1g56610		at5g39680
	at1g54840	at5g30510				at1g56612		at5g39860
	at1g54940	at5g31412				at1g56630		at5g39865
	at1g54990	at5g32590				at1g56650		at5g40030
	at1g55050	at5g32597				at1g56750		at5g42260
	at1g55120	at5g32613				at1g56900		at5g42530
	at1g55220	at5g33355				at1g56960		at5g42640
	at1g55230	at5g33393				at1g56970		at5g43110
	at1g55270	at5g33421				at1g57490		at5g43745
	at1g55400	at5g33806				at1g57570		at5g43810
	at1g55490	at5g34829				at1g57590		at5g44640
	at1g55530	at5g34850				at1g57800		at5g44660
	at1g55710	at5g34882				at1g58040		at5g44740
	at1g55750	at5g34930				at1g58050		at5g44930
	at1g55860	at5g35069				at1g58100		at5g45020
	at1g55940	at5g35338				at1g58110		at5g45110
	at1g56140	at5g35360				at1g58242		at5g45190
	at1g56160	at5g35450				at1g58520		at5g45550
	at1g56165	at5g35490				at1g59453		at5g45573
	at1g56260	at5g35603				at1g59510		at5g45730
	at1g56290	at5g35770				at1g59520		at5g47130
	at1g56310	at5g35920				at1g59580		at5g47220
	at1g56340	at5g35940				at1g59680		at5g47410
	at1g56430	at5g36080				at1g59720		at5g47860
	at1g56510	at5g36280				at1g59725		at5g48545
	at1g56530	at5g36300				at1g59780		at5g48740
	at1g56610	at5g36480				at1g59833		at5g48880
	at1g56612	at5g36890				at1g59900		at5g49070
	at1g56630	at5g37610				at1g59930		at5g50310
	at1g56650	at5g37667				at1g59990		at5g51980
	at1g56750	at5g37770				at1g60150		at5g52050
	at1g56900	at5g37790				at1g60200		at5g52150
	at1g56960	at5g38000				at1g60340		at5g53120
	at1g56970	at5g38010				at1g60440		at5g53450
	at1g57490	at5g38040				at1g60505		at5g54440
	at1g57570	at5g38190				at1g60525		at5g54610
	at1g57590	at5g38210				at1g60530		at5g55010
	at1g57630	at5g38250				at1g60545		at5g55070
	at1g57770	at5g38344				at1g60650		at5g55460
	at1g57800	at5g38450				at1g60690		at5g56250
	at1g58040	at5g38550				at1g60770		at5g56380
	at1g58050	at5g38560				at1g60850		at5g57480
	at1g58100	at5g38710				at1g60870		at5g57940
	at1g58110	at5g38860				at1g60985		at5g58160
	at1g58242	at5g39670				at1g61010		at5g59280
	at1g58520	at5g39680				at1g61040		at5g60280
	at1g59453	at5g39860				at1g61210		at5g62970
	at1g59510	at5g39865				at1g61230
	at1g59520	at5g40030				at1g61415
	at1g59580	at5g42260				at1g61450
	at1g59680	at5g42530				at1g61820
	at1g59720	at5g42640				at1g61860
	at1g59725	at5g43110				at1g61960
	at1g59780	at5g43745				at1g62040
	at1g59833	at5g43810				at1g62160
	at1g59900	at5g44640				at1g62190
	at1g59930	at5g44660				at1g62262
	at1g59990	at5g44740				at1g62270
	at1g60150	at5g44930				at1g62305
	at1g60200	at5g45020				at1g62350
	at1g60340	at5g45110				at1g62355
	at1g60440	at5g45190				at1g62430
	at1g60505	at5g45550				at1g62550
	at1g60525	at5g45573				at1g62630
	at1g60530	at5g45730				at1g62700
	at1g60545	at5g47130				at1g62800
	at1g60650	at5g47220				at1g62900
	at1g60690	at5g47410				at1g63010
	at1g60770	at5g47860				at1g63110
	at1g60850	at5g47980				at1g63120
	at1g60870	at5g48545				at1g63210
	at1g60985	at5g48740				at1g63300
	at1g61010	at5g48880				at1g63330
	at1g61040	at5g49070				at1g63680
	at1g61210	at5g50310				at1g63690
	at1g61230	at5g51980				at1g63770
	at1g61415	at5g52050				at1g63990
	at1g61450	at5g52150				at1g64000
	at1g61480	at5g52710				at1g64100
	at1g61610	at5g53120				at1g64110
	at1g61820	at5g53450				at1g64180
	at1g61860	at5g54280				at1g64250
	at1g61960	at5g54440				at1g64300
	at1g62040	at5g54610				at1g64330
	at1g62160	at5g55010				at1g64340
	at1g62190	at5g55070				at1g64370
	at1g62262	at5g55460				at1g64410
	at1g62270	at5g56250				at1g64520
	at1g62305	at5g56380				at1g64790
	at1g62350	at5g57480				at1g64980
	at1g62355	at5g57940				at1g65090
	at1g62430	at5g58160				at1g65140
	at1g62540	at5g59280				at1g65240
	at1g62550	at5g60280				at1g65260
	at1g62560	at5g62970				at1g65346
	at1g62630					at1g65380
	at1g62700					at1g65390
	at1g62800					at1g65450
	at1g62900					at1g65550
	at1g63010					at1g65580
	at1g63110					at1g65681
	at1g63120					at1g65960
	at1g63210					at1g65985
	at1g63300					at1g66040
	at1g63330					at1g66050
	at1g63680					at1g66090
	at1g63690					at1g66120
	at1g63770					at1g66173
	at1g63990					at1g66260
	at1g64000					at1g66290
	at1g64100					at1g66440
	at1g64110					at1g66450
	at1g64180					at1g66540
	at1g64250					at1g66610
	at1g64300					at1g66740
	at1g64330					at1g66750
	at1g64340					at1g66780
	at1g64370					at1g66783
	at1g64410					at1g66790
	at1g64520					at1g66900
	at1g64790					at1g66960
	at1g64980					at1g66970
	at1g65090					at1g67025
	at1g65140					at1g67080
	at1g65240					at1g67210
	at1g65260					at1g67240
	at1g65346					at1g67270
	at1g65380					at1g67280
	at1g65390					at1g67410
	at1g65450					at1g67450
	at1g65550					at1g67480
	at1g65580					at1g67626
	at1g65681					at1g67650
	at1g65960					at1g67670
	at1g65985					at1g67730
	at1g66040					at1g67820
	at1g66050					at1g67875
	at1g66090					at1g67930
	at1g66120					at1g67970
	at1g66173					at1g67990
	at1g66260					at1g68030
	at1g66290					at1g68060
	at1g66440					at1g68070
	at1g66450					at1g68210
	at1g66540					at1g68250
	at1g66570					at1g68700
	at1g66610					at1g68710
	at1g66740					at1g68780
	at1g66750					at1g68890
	at1g66780					at1g68905
	at1g66783					at1g68910
	at1g66790					at1g69150
	at1g66900					at1g69250
	at1g66960					at1g69310
	at1g66970					at1g69350
	at1g67025					at1g69390
	at1g67080					at1g69420
	at1g67210					at1g69510
	at1g67240					at1g69570
	at1g67270					at1g69572
	at1g67280					at1g69640
	at1g67410					at1g69650
	at1g67450					at1g69750
	at1g67480					at1g69770
	at1g67626					at1g70060
	at1g67650					at1g70080
	at1g67670					at1g70110
	at1g67730					at1g70380
	at1g67820					at1g70410
	at1g67875					at1g70430
	at1g67900					at1g70490
	at1g67930					at1g70590
	at1g67970					at1g70630
	at1g67980					at1g70650
	at1g67990					at1g70830
	at1g68030					at1g70960
	at1g68060					at1g70970
	at1g68070					at1g71010
	at1g68210					at1g71070
	at1g68250					at1g71090
	at1g68400					at1g71270
	at1g68700					at1g71320
	at1g68710					at1g71350
	at1g68780					at1g71692
	at1g68890					at1g71697
	at1g68905					at1g71700
	at1g68910					at1g71830
	at1g69150					at1g71930
	at1g69250					at1g71980
	at1g69310					at1g72080
	at1g69350					at1g72090
	at1g69390					at1g72260
	at1g69420					at1g72280
	at1g69510					at1g72300
	at1g69570					at1g72340
	at1g69572					at1g72590
	at1g69640					at1g72640
	at1g69650					at1g72700
	at1g69750					at1g72760
	at1g69770					at1g72770
	at1g70060					at1g72990
	at1g70080					at1g73030
	at1g70110					at1g73040
	at1g70380					at1g73370
	at1g70410					at1g73410
	at1g70430					at1g73470
	at1g70490					at1g73490
	at1g70590					at1g73600
	at1g70630					at1g73602
	at1g70650					at1g73670
	at1g70830					at1g73730
	at1g70960					at1g74160
	at1g70970					at1g74180
	at1g71010					at1g74240
	at1g71070					at1g74250
	at1g71090					at1g74310
	at1g71270					at1g74360
	at1g71320					at1g74410
	at1g71350					at1g74530
	at1g71692					at1g74630
	at1g71697					at1g74680
	at1g71700					at1g74740
	at1g71830					at1g75330
	at1g71920					at1g75670
	at1g71930					at1g75700
	at1g71980					at1g75730
	at1g72080					at1g75760
	at1g72090					at1g75920
	at1g72260					at1g76010
	at1g72280					at1g76050
	at1g72300					at1g76140
	at1g72340					at1g76150
	at1g72590					at1g76200
	at1g72640					at1g76260
	at1g72700					at1g76280
	at1g72760					at1g76310
	at1g72770					at1g76380
	at1g72990					at1g76550
	at1g73030					at1g76720
	at1g73040					at1g77000
	at1g73370					at1g77095
	at1g73410					at1g77270
	at1g73470					at1g77310
	at1g73490					at1g77350
	at1g73600					at1g77530
	at1g73602					at1g77590
	at1g73670					at1g77770
	at1g73730					at1g77810
	at1g74160					at1g77820
	at1g74180					at1g77850
	at1g74240					at1g77890
	at1g74250					at1g77920
	at1g74260					at1g77960
	at1g74290					at1g77980
	at1g74310					at1g78050
	at1g74360					at1g78510
	at1g74410					at1g78550
	at1g74530					at1g78610
	at1g74630					at1g78790
	at1g74680					at1g78915
	at1g74740					at1g79030
	at1g74770					at1g79150
	at1g75330					at1g79190
	at1g75670					at1g79440
	at1g75700					at1g79460
	at1g75730					at1g79529
	at1g75760					at1g79530
	at1g75920					at1g79610
	at1g76010					at1g79620
	at1g76050					at1g79640
	at1g76140					at1g79730
	at1g76150					at1g80150
	at1g76200					at1g80190
	at1g76260					at1g80300
	at1g76280					at1g80370
	at1g76310					at1g80490
	at1g76380					at1g80720
	at1g76550					at1g80810
	at1g76720					at1g80880
	at1g76990					at1g80910
	at1g77000					at2g01130
	at1g77095					at2g01280
	at1g77270					at2g01630
	at1g77310					at2g01660
	at1g77350					at2g01720
	at1g77530					at2g01760
	at1g77590					at2g01790
	at1g77770					at2g01800
	at1g77810					at2g01830
	at1g77820					at2g01880
	at1g77850					at2g01900
	at1g77890					at2g01905
	at1g77920					at2g01920
	at1g77960					at2g01960
	at1g77980					at2g01990
	at1g78050					at2g02148
	at1g78510					at2g02160
	at1g78550					at2g02250
	at1g78610					at2g02340
	at1g78790					at2g02370
	at1g78915					at2g02380
	at1g79030					at2g02470
	at1g79150					at2g02498
	at1g79190					at2g02780
	at1g79440					at2g02790
	at1g79460					at2g02795
	at1g79529					at2g02800
	at1g79530					at2g02810
	at1g79610					at2g02830
	at1g79620					at2g02980
	at1g79640					at2g03180
	at1g79730					at2g03240
	at1g80150					at2g03260
	at1g80190					at2g03270
	at1g80300					at2g03750
	at1g80370					at2g03810
	at1g80490					at2g03821
	at1g80720					at2g03822
	at1g80810					at2g03860
	at1g80880					at2g03955
	at1g80910					at2g03970
	at2g01130					at2g03980
	at2g01280					at2g04039
	at2g01630					at2g04140
	at2g01660					at2g04160
	at2g01720					at2g04180
	at2g01760					at2g04280
	at2g01790					at2g04290
	at2g01800					at2g04300
	at2g01830					at2g04390
	at2g01880					at2g04530
	at2g01900					at2g04540
	at2g01905					at2g04600
	at2g01920					at2g04630
	at2g01960					at2g04690
	at2g01990					at2g04970
	at2g02148					at2g05390
	at2g02160					at2g05845
	at2g02250					at2g05995
	at2g02340					at2g06000
	at2g02370					at2g06020
	at2g02380					at2g06950
	at2g02470					at2g07050
	at2g02498					at2g07674
	at2g02780					at2g07681
	at2g02790					at2g07696
	at2g02795					at2g07706
	at2g02800					at2g07707
	at2g02810					at2g07708
	at2g02830					at2g07743
	at2g02980					at2g07749
	at2g03140					at2g07773
	at2g03180					at2g07787
	at2g03240					at2g07815
	at2g03260					at2g11005
	at2g03270					at2g11235
	at2g03750					at2g11290
	at2g03810					at2g13125
	at2g03821					at2g13250
	at2g03822					at2g13370
	at2g03860					at2g13690
	at2g03955					at2g13810
	at2g03970					at2g13820
	at2g03980					at2g13970
	at2g04039					at2g14080
	at2g04140					at2g14210
	at2g04160					at2g14220
	at2g04180					at2g14230
	at2g04280					at2g14245
	at2g04290					at2g14300
	at2g04300					at2g14470
	at2g04390					at2g14520
	at2g04530					at2g14670
	at2g04540					at2g14700
	at2g04600					at2g14820
	at2g04630					at2g15160
	at2g04690					at2g15230
	at2g04970					at2g15290
	at2g05390					at2g15350
	at2g05845					at2g15480
	at2g05995					at2g15560
	at2g06000					at2g15620
	at2g06020					at2g15770
	at2g06950					at2g15820
	at2g07050					at2g16365
	at2g07674					at2g16390
	at2g07681					at2g16400
	at2g07682					at2g16485
	at2g07696					at2g16500
	at2g07698					at2g16595
	at2g07706					at2g16630
	at2g07707					at2g16650
	at2g07708					at2g16710
	at2g07721					at2g16750
	at2g07743					at2g16960
	at2g07749					at2g16970
	at2g07773					at2g17360
	at2g07787					at2g17440
	at2g07815					at2g17520
	at2g11005					at2g17530
	at2g11235					at2g17550
	at2g11290					at2g17610
	at2g13125					at2g17800
	at2g13250					at2g17820
	at2g13370					at2g17840
	at2g13690					at2g18030
	at2g13810					at2g18060
	at2g13820					at2g18070
	at2g13970					at2g18130
	at2g14080					at2g18180
	at2g14170					at2g18250
	at2g14210					at2g18750
	at2g14220					at2g18915
	at2g14230					at2g18950
	at2g14245					at2g19000
	at2g14300					at2g19140
	at2g14470					at2g19290
	at2g14520					at2g19520
	at2g14670					at2g19806
	at2g14700					at2g20000
	at2g14820					at2g20050
	at2g15160					at2g20610
	at2g15230					at2g20630
	at2g15290					at2g20805
	at2g15350					at2g20900
	at2g15480					at2g21100
	at2g15560					at2g21150
	at2g15620					at2g21350
	at2g15770					at2g21380
	at2g15820					at2g21450
	at2g16270					at2g21600
	at2g16365					at2g21720
	at2g16390					at2g21790
	at2g16400					at2g21920
	at2g16485					at2g21930
	at2g16500					at2g21940
	at2g16595					at2g22120
	at2g16630					at2g22270
	at2g16650					at2g22290
	at2g16710					at2g22530
	at2g16750					at2g22600
	at2g16960					at2g22630
	at2g16970					at2g22795
	at2g17360					at2g22805
	at2g17440					at2g22830
	at2g17520					at2g22960
	at2g17530					at2g22990
	at2g17550					at2g23080
	at2g17610					at2g23090
	at2g17800					at2g23142
	at2g17820					at2g23190
	at2g17840					at2g23310
	at2g18030					at2g23420
	at2g18060					at2g23540
	at2g18070					at2g23660
	at2g18130					at2g23920
	at2g18150					at2g24050
	at2g18180					at2g24140
	at2g18250					at2g24330
	at2g18530					at2g24390
	at2g18750					at2g24560
	at2g18915					at2g24615
	at2g18950					at2g24640
	at2g19000					at2g24650
	at2g19140					at2g24660
	at2g19290					at2g24690
	at2g19520					at2g24700
	at2g19806					at2g24765
	at2g20000					at2g24870
	at2g20050					at2g24960
	at2g20610					at2g24970
	at2g20630					at2g25050
	at2g20805					at2g25080
	at2g20900					at2g25270
	at2g21100					at2g25290
	at2g21150					at2g25330
	at2g21350					at2g25355
	at2g21380					at2g25430
	at2g21450					at2g25490
	at2g21600					at2g25500
	at2g21720					at2g25540
	at2g21790					at2g25690
	at2g21920					at2g25737
	at2g21930					at2g25760
	at2g21940					at2g26080
	at2g22120					at2g26120
	at2g22270					at2g26280
	at2g22290					at2g26320
	at2g22530					at2g26390
	at2g22600					at2g26420
	at2g22630					at2g26510
	at2g22795					at2g26540
	at2g22805					at2g26590
	at2g22830					at2g26610
	at2g22930					at2g26620
	at2g22960					at2g26650
	at2g22990					at2g26830
	at2g23050					at2g26850
	at2g23080					at2g26910
	at2g23090					at2g26920
	at2g23142					at2g27010
	at2g23190					at2g27070
	at2g23310					at2g27320
	at2g23420					at2g27360
	at2g23540					at2g27380
	at2g23660					at2g27450
	at2g23920					at2g27730
	at2g24050					at2g27740
	at2g24140					at2g27760
	at2g24330					at2g27810
	at2g24390					at2g27860
	at2g24560					at2g27880
	at2g24615					at2g27920
	at2g24640					at2g27950
	at2g24650					at2g28020
	at2g24660					at2g28085
	at2g24690					at2g28100
	at2g24700					at2g28130
	at2g24765					at2g28260
	at2g24870					at2g28290
	at2g24960					at2g28320
	at2g24970					at2g28360
	at2g24980					at2g28380
	at2g25050					at2g28550
	at2g25080					at2g28620
	at2g25160					at2g28900
	at2g25270					at2g28990
	at2g25290					at2g29140
	at2g25330					at2g29240
	at2g25355					at2g29400
	at2g25430					at2g29410
	at2g25490					at2g29510
	at2g25500					at2g29600
	at2g25540					at2g29650
	at2g25690					at2g29680
	at2g25737					at2g29710
	at2g25760					at2g29720
	at2g26080					at2g29880
	at2g26120					at2g29920
	at2g26280					at2g29970
	at2g26320					at2g30110
	at2g26390					at2g30250
	at2g26420					at2g30290
	at2g26510					at2g30350
	at2g26540					at2g30460
	at2g26590					at2g30505
	at2g26610					at2g30560
	at2g26620					at2g30615
	at2g26650					at2g30710
	at2g26760					at2g30730
	at2g26830					at2g30770
	at2g26850					at2g30820
	at2g26910					at2g30910
	at2g26920					at2g30950
	at2g27010					at2g30990
	at2g27070					at2g31020
	at2g27320					at2g31030
	at2g27360					at2g31060
	at2g27380					at2g31081
	at2g27450					at2g31130
	at2g27730					at2g31470
	at2g27740					at2g31600
	at2g27760					at2g31650
	at2g27810					at2g31680
	at2g27860					at2g31700
	at2g27880					at2g31810
	at2g27920					at2g31840
	at2g27950					at2g31865
	at2g28020					at2g31930
	at2g28085					at2g32010
	at2g28100					at2g32290
	at2g28130					at2g32320
	at2g28260					at2g32415
	at2g28290					at2g32580
	at2g28320					at2g32900
	at2g28360					at2g33030
	at2g28380					at2g33080
	at2g28550					at2g33110
	at2g28620					at2g33205
	at2g28900					at2g33220
	at2g28990					at2g33290
	at2g29140					at2g33340
	at2g29240					at2g33380
	at2g29400					at2g33560
	at2g29410					at2g33640
	at2g29510					at2g33845
	at2g29600					at2g33847
	at2g29650					at2g33980
	at2g29680					at2g34180
	at2g29710					at2g34370
	at2g29720					at2g34460
	at2g29880					at2g34470
	at2g29920					at2g34530
	at2g29970					at2g34590
	at2g30110					at2g34720
	at2g30250					at2g34750
	at2g30290					at2g34835
	at2g30350					at2g34860
	at2g30460					at2g35075
	at2g30505					at2g35170
	at2g30560					at2g35250
	at2g30615					at2g35620
	at2g30710					at2g35738
	at2g30730					at2g35740
	at2g30770					at2g36110
	at2g30820					at2g36180
	at2g30910					at2g36350
	at2g30950					at2g36370
	at2g30990					at2g36450
	at2g31020					at2g36500
	at2g31030					at2g36710
	at2g31060					at2g36900
	at2g31081					at2g36930
	at2g31130					at2g36980
	at2g31470					at2g37010
	at2g31600					at2g37020
	at2g31650					at2g37150
	at2g31680					at2g37230
	at2g31700					at2g37280
	at2g31810					at2g37370
	at2g31840					at2g37510
	at2g31865					at2g37680
	at2g31930					at2g37700
	at2g32010					at2g37810
	at2g32290					at2g38220
	at2g32320					at2g38300
	at2g32415					at2g38370
	at2g32580					at2g38590
	at2g32900					at2g38720
	at2g33030					at2g38880
	at2g33080					at2g39080
	at2g33110					at2g39110
	at2g33205					at2g39170
	at2g33220					at2g39445
	at2g33290					at2g39675
	at2g33340					at2g39681
	at2g33380					at2g39800
	at2g33560					at2g39805
	at2g33640					at2g39830
	at2g33770					at2g39840
	at2g33845					at2g39850
	at2g33847					at2g39940
	at2g33980					at2g39960
	at2g34180					at2g40070
	at2g34370					at2g40440
	at2g34460					at2g40570
	at2g34470					at2g40660
	at2g34530					at2g40770
	at2g34590					at2g40780
	at2g34720					at2g40820
	at2g34750					at2g40840
	at2g34835					at2g40930
	at2g34860					at2g40935
	at2g35075					at2g40950
	at2g35170					at2g41140
	at2g35250					at2g41250
	at2g35620					at2g41630
	at2g35738					at2g41700
	at2g35740					at2g41710
	at2g36110					at2g41745
	at2g36180					at2g41760
	at2g36350					at2g41770
	at2g36370					at2g42070
	at2g36450					at2g42120
	at2g36500					at2g42130
	at2g36710					at2g42190
	at2g36750					at2g42260
	at2g36900					at2g42460
	at2g36930					at2g42660
	at2g36980					at2g42670
	at2g37010					at2g42720
	at2g37020					at2g42750
	at2g37150					at2g43050
	at2g37230					at2g43070
	at2g37280					at2g43140
	at2g37370					at2g43330
	at2g37510					at2g43420
	at2g37680					at2g43465
	at2g37700					at2g43500
	at2g37810					at2g43810
	at2g38220					at2g43865
	at2g38300					at2g43900
	at2g38370					at2g44065
	at2g38590					at2g44090
	at2g38720					at2g44160
	at2g38880					at2g44220
	at2g39080					at2g44255
	at2g39110					at2g44260
	at2g39170					at2g44280
	at2g39445					at2g44350
	at2g39675					at2g44460
	at2g39681					at2g44470
	at2g39770					at2g44480
	at2g39800					at2g44560
	at2g39805					at2g44570
	at2g39830					at2g44650
	at2g39840					at2g44660
	at2g39850					at2g44760
	at2g39940					at2g44770
	at2g39960					at2g44860
	at2g40070					at2g44925
	at2g40440					at2g45140
	at2g40570					at2g45250
	at2g40660					at2g45690
	at2g40770					at2g45740
	at2g40780					at2g45770
	at2g40820					at2g45990
	at2g40840					at2g46000
	at2g40930					at2g46040
	at2g40935					at2g46240
	at2g40950					at2g46290
	at2g41140					at2g46340
	at2g41250					at2g46460
	at2g41630					at2g46510
	at2g41700					at2g46570
	at2g41710					at2g46572
	at2g41745					at2g46710
	at2g41760					at2g46830
	at2g41770					at2g46860
	at2g42070					at2g46900
	at2g42120					at2g46960
	at2g42130					at2g46980
	at2g42190					at2g47060
	at2g42260					at2g47170
	at2g42460					at2g47310
	at2g42660					at2g47500
	at2g42670					at2g47700
	at2g42720					at2g47760
	at2g42750					at2g47850
	at2g43050					at2g48070
	at2g43070					at2g48075
	at2g43140					at3g01160
	at2g43330					at3g01280
	at2g43420					at3g01300
	at2g43465					at3g01350
	at2g43500					at3g01360
	at2g43810					at3g01410
	at2g43865					at3g01435
	at2g43900					at3g01640
	at2g44065					at3g01770
	at2g44090					at3g02070
	at2g44160					at3g02370
	at2g44220					at3g02420
	at2g44255					at3g02570
	at2g44260					at3g02590
	at2g44280					at3g02610
	at2g44350					at3g02800
	at2g44460					at3g02830
	at2g44470					at3g02930
	at2g44480					at3g02940
	at2g44560					at3g03010
	at2g44570					at3g03050
	at2g44650					at3g03060
	at2g44660					at3g03300
	at2g44760					at3g03360
	at2g44770					at3g03370
	at2g44860					at3g03610
	at2g44925					at3g03620
	at2g45140					at3g03900
	at2g45250					at3g04100
	at2g45690					at3g04240
	at2g45740					at3g04250
	at2g45770					at3g04350
	at2g45990					at3g04490
	at2g46000					at3g04580
	at2g46040					at3g04605
	at2g46240					at3g04630
	at2g46290					at3g04780
	at2g46340					at3g05040
	at2g46460					at3g05050
	at2g46510					at3g05070
	at2g46570					at3g05310
	at2g46572					at3g05330
	at2g46710					at3g05400
	at2g46830					at3g05410
	at2g46860					at3g05420
	at2g46900					at3g05470
	at2g46960					at3g05545
	at2g46980					at3g05570
	at2g47060					at3g05670
	at2g47170					at3g05725
	at2g47310					at3g05740
	at2g47500					at3g05750
	at2g47700					at3g05770
	at2g47760					at3g05790
	at2g47850					at3g05810
	at2g48070					at3g05910
	at2g48075					at3g05930
	at3g01160					at3g05932
	at3g01280					at3g05940
	at3g01300					at3g05970
	at3g01350					at3g06030
	at3g01360					at3g06040
	at3g01410					at3g06050
	at3g01435					at3g06140
	at3g01640					at3g06180
	at3g01770					at3g06230
	at3g02070					at3g06250
	at3g02370					at3g06340
	at3g02420					at3g06440
	at3g02570					at3g06480
	at3g02590					at3g06560
	at3g02610					at3g06600
	at3g02800					at3g06630
	at3g02830					at3g06660
	at3g02850					at3g06710
	at3g02930					at3g06730
	at3g02940					at3g06940
	at3g03010					at3g07040
	at3g03050					at3g07140
	at3g03060					at3g07180
	at3g03300					at3g07370
	at3g03360					at3g07380
	at3g03370					at3g07560
	at3g03610					at3g07640
	at3g03620					at3g07680
	at3g03900					at3g07690
	at3g04100					at3g07730
	at3g04240					at3g07740
	at3g04250					at3g07770
	at3g04350					at3g07880
	at3g04490					at3g07960
	at3g04580					at3g08505
	at3g04605					at3g08670
	at3g04630					at3g08740
	at3g04780					at3g08850
	at3g05040					at3g08980
	at3g05050					at3g09000
	at3g05070					at3g09010
	at3g05310					at3g09110
	at3g05330					at3g09210
	at3g05400					at3g09320
	at3g05410					at3g09350
	at3g05420					at3g09405
	at3g05470					at3g09470
	at3g05545					at3g09510
	at3g05570					at3g09720
	at3g05670					at3g09760
	at3g05680					at3g09810
	at3g05725					at3g09960
	at3g05740					at3g10070
	at3g05750					at3g10140
	at3g05770					at3g10380
	at3g05790					at3g10440
	at3g05810					at3g10450
	at3g05910					at3g10470
	at3g05930					at3g10630
	at3g05932					at3g10640
	at3g05940					at3g10670
	at3g05970					at3g10820
	at3g06030					at3g10840
	at3g06040					at3g10890
	at3g06050					at3g10915
	at3g06140					at3g10920
	at3g06180					at3g10986
	at3g06230					at3g11010
	at3g06250					at3g11020
	at3g06340					at3g11030
	at3g06440					at3g11040
	at3g06480					at3g11070
	at3g06560					at3g11170
	at3g06600					at3g11200
	at3g06630					at3g11270
	at3g06660					at3g11310
	at3g06710					at3g11350
	at3g06730					at3g11397
	at3g06940					at3g11402
	at3g07040					at3g11510
	at3g07070					at3g11520
	at3g07140					at3g11530
	at3g07180					at3g11540
	at3g07370					at3g11680
	at3g07380					at3g11730
	at3g07560					at3g11770
	at3g07640					at3g11880
	at3g07680					at3g11920
	at3g07690					at3g11970
	at3g07730					at3g11990
	at3g07740					at3g12120
	at3g07770					at3g12145
	at3g07880					at3g12170
	at3g07960					at3g12200
	at3g08500					at3g12220
	at3g08505					at3g12240
	at3g08670					at3g12300
	at3g08740					at3g12480
	at3g08850					at3g12550
	at3g08980					at3g12560
	at3g09000					at3g12770
	at3g09010					at3g12950
	at3g09080					at3g12980
	at3g09110					at3g13062
	at3g09210					at3g13080
	at3g09320					at3g13120
	at3g09350					at3g13200
	at3g09405					at3g13230
	at3g09470					at3g13235
	at3g09510					at3g13250
	at3g09720					at3g13330
	at3g09760					at3g13450
	at3g09810					at3g13460
	at3g09830					at3g13510
	at3g09960					at3g13662
	at3g10070					at3g13700
	at3g10140					at3g13710
	at3g10380					at3g13772
	at3g10440					at3g13870
	at3g10450					at3g13900
	at3g10470					at3g13930
	at3g10630					at3g14000
	at3g10640					at3g14010
	at3g10670					at3g14050
	at3g10820					at3g14075
	at3g10840					at3g14120
	at3g10890					at3g14130
	at3g10915					at3g14360
	at3g10920					at3g14520
	at3g10986					at3g14680
	at3g11010					at3g14840
	at3g11020					at3g14860
	at3g11030					at3g14900
	at3g11040					at3g14930
	at3g11070					at3g14950
	at3g11170					at3g15000
	at3g11200					at3g15010
	at3g11270					at3g15020
	at3g11310					at3g15150
	at3g11350					at3g15160
	at3g11397					at3g15260
	at3g11402					at3g15290
	at3g11510					at3g15340
	at3g11520					at3g15400
	at3g11530					at3g15410
	at3g11540					at3g15480
	at3g11670					at3g15750
	at3g11680					at3g15950
	at3g11730					at3g16060
	at3g11770					at3g16090
	at3g11880					at3g16310
	at3g11920					at3g16320
	at3g11970					at3g16340
	at3g11990					at3g16350
	at3g12120					at3g16480
	at3g12145					at3g16565
	at3g12170					at3g16620
	at3g12200					at3g16785
	at3g12220					at3g16810
	at3g12240					at3g16840
	at3g12300					at3g16850
	at3g12480					at3g17000
	at3g12550					at3g17040
	at3g12560					at3g17050
	at3g12770					at3g17090
	at3g12950					at3g17365
	at3g12980					at3g17380
	at3g13062					at3g17410
	at3g13080					at3g17465
	at3g13120					at3g17500
	at3g13200					at3g17530
	at3g13230					at3g17540
	at3g13235					at3g17590
	at3g13250					at3g17620
	at3g13330					at3g17900
	at3g13450					at3g17920
	at3g13460					at3g18040
	at3g13510					at3g18070
	at3g13662					at3g18140
	at3g13700					at3g18160
	at3g13710					at3g18200
	at3g13772					at3g18460
	at3g13870					at3g18520
	at3g13900					at3g18620
	at3g13930					at3g18680
	at3g14000					at3g18730
	at3g14010					at3g18750
	at3g14050					at3g18990
	at3g14075					at3g19045
	at3g14120					at3g19170
	at3g14130					at3g19190
	at3g14205					at3g19260
	at3g14360					at3g19290
	at3g14520					at3g19330
	at3g14680					at3g19420
	at3g14700					at3g19450
	at3g14840					at3g19460
	at3g14860					at3g19540
	at3g14900					at3g19620
	at3g14930					at3g19640
	at3g14950					at3g19780
	at3g15000					at3g19790
	at3g15010					at3g19840
	at3g15020					at3g19890
	at3g15150					at3g19930
	at3g15160					at3g19960
	at3g15260					at3g20000
	at3g15290					at3g20030
	at3g15340					at3g20130
	at3g15400					at3g20150
	at3g15410					at3g20300
	at3g15480					at3g20410
	at3g15750					at3g20480
	at3g15950					at3g20550
	at3g16060					at3g20560
	at3g16090					at3g20690
	at3g16180					at3g20700
	at3g16310					at3g20710
	at3g16320					at3g20740
	at3g16340					at3g20860
	at3g16350					at3g20890
	at3g16480					at3g20960
	at3g16565					at3g21080
	at3g16620					at3g21160
	at3g16785					at3g21170
	at3g16810					at3g21180
	at3g16840					at3g21200
	at3g16850					at3g21230
	at3g17000					at3g21430
	at3g17040					at3g21500
	at3g17050					at3g21540
	at3g17090					at3g21570
	at3g17365					at3g21590
	at3g17380					at3g21820
	at3g17410					at3g21940
	at3g17465					at3g21960
	at3g17500					at3g21990
	at3g17530					at3g22030
	at3g17540					at3g22050
	at3g17590					at3g22057
	at3g17620					at3g22190
	at3g17900					at3g22200
	at3g17920					at3g22235
	at3g18040					at3g22350
	at3g18070					at3g22380
	at3g18140					at3g22421
	at3g18160					at3g22590
	at3g18200					at3g22630
	at3g18290					at3g22710
	at3g18460					at3g22810
	at3g18520					at3g22955
	at3g18620					at3g22980
	at3g18680					at3g23040
	at3g18730					at3g23220
	at3g18750					at3g23330
	at3g18990					at3g23470
	at3g19045					at3g23633
	at3g19170					at3g23650
	at3g19190					at3g23670
	at3g19260					at3g23680
	at3g19290					at3g23710
	at3g19330					at3g23810
	at3g19420					at3g23850
	at3g19450					at3g23870
	at3g19460					at3g23900
	at3g19540					at3g23950
	at3g19620					at3g23980
	at3g19640					at3g23990
	at3g19780					at3g24180
	at3g19790					at3g24270
	at3g19840					at3g24350
	at3g19890					at3g24460
	at3g19930					at3g24465
	at3g19960					at3g24542
	at3g20000					at3g24590
	at3g20030					at3g24660
	at3g20130					at3g24670
	at3g20150					at3g24715
	at3g20300					at3g24730
	at3g20410					at3g24760
	at3g20480					at3g24840
	at3g20550					at3g24870
	at3g20560					at3g24880
	at3g20690					at3g25060
	at3g20700					at3g25090
	at3g20710					at3g25120
	at3g20740					at3g25130
	at3g20860					at3g25160
	at3g20890					at3g25460
	at3g20960					at3g25490
	at3g21080					at3g25510
	at3g21160					at3g25570
	at3g21170					at3g25572
	at3g21180					at3g25585
	at3g21200					at3g25630
	at3g21230					at3g25727
	at3g21430					at3g25840
	at3g21500					at3g25850
	at3g21540					at3g25855
	at3g21570					at3g25990
	at3g21590					at3g26000
	at3g21700					at3g26040
	at3g21820					at3g26070
	at3g21870					at3g26115
	at3g21940					at3g26140
	at3g21960					at3g26250
	at3g21990					at3g26280
	at3g22030					at3g26370
	at3g22050					at3g26500
	at3g22057					at3g26560
	at3g22190					at3g26747
	at3g22200					at3g26782
	at3g22235					at3g26850
	at3g22350					at3g26900
	at3g22380					at3g26934
	at3g22421					at3g26990
	at3g22590					at3g27000
	at3g22630					at3g27020
	at3g22710					at3g27025
	at3g22810					at3g27050
	at3g22955					at3g27210
	at3g22980					at3g27250
	at3g23040					at3g27310
	at3g23220					at3g27380
	at3g23330					at3g27400
	at3g23470					at3g27410
	at3g23633					at3g27560
	at3g23650					at3g27680
	at3g23670					at3g27730
	at3g23680					at3g27950
	at3g23710					at3g27960
	at3g23810					at3g28005
	at3g23850					at3g28080
	at3g23870					at3g28100
	at3g23900					at3g28150
	at3g23950					at3g28220
	at3g23980					at3g28260
	at3g23990					at3g28315
	at3g24180					at3g28345
	at3g24190					at3g28460
	at3g24270					at3g28490
	at3g24350					at3g28520
	at3g24460					at3g28550
	at3g24465					at3g28670
	at3g24542					at3g28780
	at3g24590					at3g28855
	at3g24660					at3g28915
	at3g24670					at3g28925
	at3g24715					at3g28945
	at3g24730					at3g28956
	at3g24760					at3g29033
	at3g24840					at3g29090
	at3g24870					at3g29110
	at3g24880					at3g29160
	at3g25060					at3g29185
	at3g25090					at3g29190
	at3g25120					at3g29410
	at3g25130					at3g29515
	at3g25160					at3g29577
	at3g25460					at3g29636
	at3g25490					at3g29642
	at3g25510					at3g29644
	at3g25570					at3g29755
	at3g25572					at3g29820
	at3g25585					at3g30200
	at3g25610					at3g30290
	at3g25630					at3g30380
	at3g25727					at3g30510
	at3g25840					at3g30724
	at3g25850					at3g30803
	at3g25855					at3g30841
	at3g25990					at3g31422
	at3g26000					at3g31630
	at3g26040					at3g32030
	at3g26070					at3g32373
	at3g26115					at3g33528
	at3g26140					at3g33595
	at3g26250					at3g42148
	at3g26280					at3g42180
	at3g26370					at3g42680
	at3g26500					at3g42820
	at3g26560					at3g42835
	at3g26747					at3g42870
	at3g26782					at3g42875
	at3g26850					at3g42922
	at3g26900					at3g42950
	at3g26934					at3g43005
	at3g26990					at3g43100
	at3g27000					at3g43205
	at3g27020					at3g43220
	at3g27025					at3g43402
	at3g27050					at3g43420
	at3g27210					at3g43425
	at3g27250					at3g43444
	at3g27310					at3g43520
	at3g27380					at3g43546
	at3g27400					at3g43760
	at3g27410					at3g43770
	at3g27560					at3g43840
	at3g27670					at3g43860
	at3g27680					at3g43920
	at3g27730					at3g43930
	at3g27950					at3g43970
	at3g27960					at3g44035
	at3g28005					at3g44090
	at3g28080					at3g44130
	at3g28100					at3g44140
	at3g28150					at3g44160
	at3g28220					at3g44171
	at3g28260					at3g44310
	at3g28315					at3g44320
	at3g28345					at3g44325
	at3g28460					at3g44340
	at3g28490					at3g44370
	at3g28520					at3g44540
	at3g28550					at3g44560
	at3g28670					at3g44820
	at3g28780					at3g44850
	at3g28855					at3g44880
	at3g28915					at3g44910
	at3g28925					at3g45310
	at3g28945					at3g45410
	at3g28956					at3g45443
	at3g29033					at3g45640
	at3g29090					at3g45800
	at3g29110					at3g45840
	at3g29160					at3g45850
	at3g29185					at3g45890
	at3g29190					at3g45910
	at3g29410					at3g45940
	at3g29515					at3g46040
	at3g29577					at3g46120
	at3g29636					at3g46206
	at3g29642					at3g46210
	at3g29644					at3g46220
	at3g29755					at3g46340
	at3g29820					at3g46350
	at3g30200					at3g46820
	at3g30290					at3g46910
	at3g30380					at3g46920
	at3g30510					at3g46980
	at3g30724					at3g47080
	at3g30803					at3g47160
	at3g30841					at3g47190
	at3g31422					at3g47230
	at3g31630					at3g47290
	at3g32030					at3g47400
	at3g32373					at3g47460
	at3g33528					at3g47550
	at3g33595					at3g47570
	at3g42148					at3g47580
	at3g42180					at3g47590
	at3g42680					at3g47610
	at3g42820					at3g47740
	at3g42835					at3g47770
	at3g42870					at3g47780
	at3g42875					at3g47833
	at3g42922					at3g47940
	at3g42950					at3g48057
	at3g43005					at3g48230
	at3g43100					at3g48235
	at3g43190					at3g48540
	at3g43205					at3g48560
	at3g43220					at3g48630
	at3g43402					at3g48670
	at3g43420					at3g48720
	at3g43425					at3g48730
	at3g43444					at3g48760
	at3g43520					at3g48780
	at3g43546					at3g48790
	at3g43760					at3g48820
	at3g43770					at3g48900
	at3g43840					at3g49010
	at3g43860					at3g49070
	at3g43920					at3g49230
	at3g43930					at3g49240
	at3g43970					at3g49250
	at3g44035					at3g49310
	at3g44090					at3g49350
	at3g44130					at3g49400
	at3g44140					at3g49410
	at3g44160					at3g49480
	at3g44171					at3g49510
	at3g44310					at3g49520
	at3g44320					at3g49600
	at3g44325					at3g49725
	at3g44340					at3g49730
	at3g44370					at3g49870
	at3g44540					at3g49920
	at3g44560					at3g50040
	at3g44820					at3g50050
	at3g44850					at3g50120
	at3g44880					at3g50230
	at3g44910					at3g50360
	at3g45140					at3g50380
	at3g45310					at3g50674
	at3g45410					at3g50790
	at3g45443					at3g51050
	at3g45640					at3g51100
	at3g45800					at3g51150
	at3g45840					at3g51180
	at3g45850					at3g51260
	at3g45890					at3g51290
	at3g45910					at3g51300
	at3g45940					at3g51325
	at3g46040					at3g51390
	at3g46120					at3g51560
	at3g46206					at3g51700
	at3g46210					at3g51830
	at3g46220					at3g51840
	at3g46340					at3g52030
	at3g46350					at3g52040
	at3g46820					at3g52190
	at3g46910					at3g52200
	at3g46920					at3g52300
	at3g46980					at3g52310
	at3g47080					at3g52640
	at3g47160					at3g52680
	at3g47190					at3g52700
	at3g47230					at3g52750
	at3g47290					at3g52780
	at3g47340					at3g52830
	at3g47400					at3g52850
	at3g47460					at3g52870
	at3g47550					at3g53000
	at3g47570					at3g53030
	at3g47580					at3g53065
	at3g47590					at3g53290
	at3g47610					at3g53300
	at3g47740					at3g53400
	at3g47770					at3g53402
	at3g47780					at3g53480
	at3g47833					at3g53510
	at3g47940					at3g53520
	at3g48057					at3g53540
	at3g48230					at3g53580
	at3g48235					at3g53630
	at3g48260					at3g53760
	at3g48540					at3g53780
	at3g48560					at3g53810
	at3g48630					at3g54130
	at3g48670					at3g54170
	at3g48720					at3g54240
	at3g48730					at3g54250
[truncated: 1,559 more rows]
